# Supplementary material for: A multimodal cross-species comparison of pancreas development
Source: Research Square preprint supplement (doi:10.21203/rs.3.rs-4151759/v1), 2024-04-03
Supplement: Supplementary file 1 [file 2e37b968451b95b386183a6a.xlsx]

## Sheet: Supplementary Table 10
Supplementary Table 10: Antibodies and reagents for hiPSC differentiation used in this study
Sheet1: Antibodies used this study
Sheet2: hiPSC differentiation protocol and reagents used in this study

## Sheet: Sheet1
Sheet1: Antibodies used this study
Primary antibodies
Target	Species	Company	Catalogue #	Clone #	RRID	Dilution
Insulin	Mouse	Sigma	I2018	K36AC10	AB_260137	1:800
Insulin	Rabbit	Cell signaling	3014	C27C9	AB_2126503	1:400
Insulin	Guinea pig	Bio-Rad	5330-0104G	polyclonal	AB_1605150	1:800
Glucagon	Mouse	Sigma	G2654	K79bB10	AB_259852	1:500
Glucagon	Rabbit	Cell Signaling	8233	D16G10	AB_10859908	1:400
Somatostatin	Mouse	Santa Cruz	sc-55565	G-10	AB_831726	1:300
Somatostatin	Mouse	Santa Cruz	sc-74556	H-11	AB_2271061	1:300
Pancreatic Polypeptide	Goat	Sigma	SAB2500747	polyclonal	AB_10611538	1:300
Ghrelin	Goat	Santa Cruz	sc-10368	polyclonal	AB_2232479	1:500
Ghrelin	Goat	Santa Cruz	sc-293422	polyclonal	NA	1:500
GATA4	Goat	Santa Cruz	sc-1237	polyclonal	AB_2108747	1:100
PDX1	Goat	R&D Systems	AF2419	polyclonal	AB_355257	1:500
PDX1	Rabbit	Cell Signaling	5679	D59H3	AB_10706174	1:500
SOX9	Rabbit	Millipore	AB5535	polyclonal	AB_2239761	1:300
SOX9	Goat	R&D systems	AF3075	polyclonal	AB_2194160	1:300
CPA1	Rabbit	LSBio	LS-C173830	polyclonal	NA	1:1000
CPA1	Rabbit	Bio-Rad	1810-0006	polyclonal	AB_616925	1:1500
NKX2-2	Mouse	DSHB Hybridoma	74.5A5	74.5A5	AB_531794	1:500
NKX2-2	Mouse	abcam	ab187375	NX2/294	AB_2889166	1:500
Neurogenin 3	Rabbit	Aviva Systems Biology	OACD05949	polyclonal	NA	1:200
Neurogenin 3	Sheep	R&D Systems	AF3444	polyclonal	AB_2149527	1:200
NKX6-1	Mouse	DSHB Hybridoma	F55A10	F55A10	AB_532378	1:300
NKX6-1	Rabbit	Acris/Novus	NBP1-82553	Polyclonal	AB_11023606	1:500
NKX6-1	Goat	R&D systems	AF5857	Polyclonal	AB_1857045	1:300
E-Cadherin	Rabbit	Cell Signaling	3195	24E10	AB_2291471	1:200
E-Cadherin	Mouse	TaKaRa	M108	ECCD-2	AB_2895157	1:400
Beta-catenin	Mouse	BD	610154	14	AB_397555	1:400
Ezrin	Mouse	Abcam	ab4069	3C12	AB_304261	1:300
KRT19	Rat	DSHB Hybridoma	TROMA-III	TROMA-III	AB_2133570	1:500
Cytokeratin	Rabbit	Dako (Agilent)	Z062201-2	Polyclonal	AB_2650434	1:500
NFIB	Rabbit	Sigma	HPA003956	Polyclonal	AB_1854424	1:500
MEIS2	Rabbit	Sigma	HPA003256	Polyclonal	AB_1079356	1:500
CD326 (EpCAM), PE-Cyanine7 conjugated	NA	LIFE Technologies	25-5791-80	G8.8	AB_1724047	1:200
Secondary Antibodies
Target	Species	Fluorophore	Company	Catalogue #	RRID	Dilution
Goat	Donkey	405	Jackson ImmunoResearch Labs	705-475-003	AB_2340426	1:800
Rabbit	Donkey	405	Abcam	ab175649	AB_2715515	1:800
Mouse	Donkey	488	ThermoFisher Scientific	A-21202	AB_141607	1:800
Goat	Donkey	488	ThermoFisher Scientific	A-11055	AB_2534102	1:800
Rabbit	Donkey	488	ThermoFisher Scientific	A-21206	AB_2535792	1:800
Rat	Donkey	488	ThermoFisher Scientific	A-21208	AB_2535794	1:800
Sheep	Donkey	488	Jackson ImmunoResearch Labs	713-546-147	AB_2340746	1:800
Mouse	Donkey	555	ThermoFisher Scientific	A-31570	AB_2536180	1:800
Goat	Donkey	555	ThermoFisher Scientific	A-21432	AB_2535853	1:800
Rabbit	Donkey	555	ThermoFisher Scientific	A-31572	AB_162543	1:800
Rat	Donkey	555	Jackson ImmunoResearch Labs	712-165-153	AB_2340667	1:800
Sheep	Donkey	555	ThermoFisher Scientific	A-21436	AB_2535857	1:800
Mouse	Donkey	647	Jackson ImmunoResearch Labs	715-605-151	AB_2340863	1:800
Goat	Donkey	647	Jackson ImmunoResearch Labs	705-605-147	AB_2340437	1:800
Rabbit	Donkey	647	ThermoFisher Scientific	A-31573	AB_2536183	1:800
Rat	Donkey	647	ThermoFisher Scientific	A-48272	AB_2893138	1:800
Guinea pig	Donkey	647	Jackson ImmunoResearch Labs	706-605-148	AB_2340476	1:800

## Sheet: Sheet2
Sheet2: hiPSC differentiation protocol and reagents used in this study
Product	Company	Catelog number	S1 (anterior definitive endoderm) Day 0	S1 (anterior definitive endoderm) Day 1-2	S2 (primitive gut tube) Day 3-5	S3 (pancreatic progenitor 1) Day 6	S4 (pancreatic progenitor 2) Day 7-11	S5 (endocrine progenitor) Day 12-18	S6 (SC-islet) Day 19-20	S6 (SC-islet) Day 21-26
Y-27632	SantaCruz	sc-281642A	-	-	-	10 μmol/L	10 μmol/L	-	10 μmol/L	-
Activin A	Peprotech	120-14-300	100 ng/mL	100 ng/mL	-	-	5 ng/mL	-	-	-
CHIR-99021	Tebu-bio	24804-0004	5 μmol/L	-	-	-	-	-	-	-
FGF7	Peprotech	100-19-300	-	-	50 ng/mL	50 ng/mL	50 ng/mL	-	-	-
LDN	Tebu-bio	T1935	-	-	-	200 nmol/L	-	-	-	-
PdBU	Millipore	524390	-	-	-	500 nmol/L	-	-	-	-
SANT-1	Sigma-Aldrich	S4572	-	-	-	0.25 μmol/L	0.25 μmol/L	0.25 μmol/L	-	-
RA	Sigma-Aldrich	R2625	-	-	-	2 μmol/L	0.1 μmol/L	0.1 μmol/L	-	-
T3	Sigma-Aldrich	T6397	-	-	-	-	-	1 μmol/L	-	-
Alk5iII	Enzo Life Sciences	ALX-270-445-M005	-	-	-	-	-	10 μmol/L	-	-
BTC	Novus Biologicals	261-CE-250/CF	-	-	-	-	-	20 ng/mL	-	-
GSiXXI	Millipore	565790	-	-	-	-	-	1 μmol/L	-	-
MCDB131	Gibco	10372-019	1x	1x	1x	1x	1x	1x	1x	1x
Glutamax, 100x	Gibco	35050038	1x	1x	1x	1x	1x	1x	1x	1x
BSA fraction V, fatty acid free	Roche	10775835001	0.02	0.02	0.02	0.02	0.02	0.02	0.02	0.02
NaHCO3	Carl Roth	8551.1	43 mmol/L	43 mmol/L	29 mmol/L	29 mmol/L	29 mmol/L	35 mmol/L	16 mmol/L	16 mmol/L
Glucose	Sigma-Aldrich	G7528	8 mmol/L	8 mmol/L	8 mmol/L	8 mmol/L	8 mmol/L	25.5 mmol/L	8 mmol/L	8 mmol/L
ITS-X, 100x	Gibco	51500-056	0.002x	0.002x	0.002x	0.5x	0.5x	0.5x	-	-
Vitamin C	Sigma-Aldrich	A4544	44 mg/L	44 mg/L	44 mg/L	44 mg/L	44 mg/L	44 mg/L	-	-
Penicillin- Streptomycin, 10000 U/mL	Gibco	15140122	100 U/mL	100 U/mL	100 U/mL	100 U/mL	100 U/mL	100 U/mL	100 U/mL	100 U/mL
Heparin	Sigma-Aldrich	H3149	-	-	-	-	-	0.01 g/L	0.01 g/L	0.01 g/L
Trace elements A, 1000x	Corning	25-021-CI	-	-	-	-	-	-	1x	1x
Trace elements B, 1000x	Corning	25-022-CI	-	-	-	-	-	-	1x	1x
ZnSO4	Sigma-Aldrich	Z0251	-	-	-	-	-	-	1 μmol/L	1 μmol/L
MEM Nonessential Amino Acid Solution, 100x	Corning	15333581	-	-	-	-	-	-	1x	1x
