# Supplementary material for: A multimodal cross-species comparison of pancreas development
Source: Research Square preprint supplement (doi:10.21203/rs.3.rs-4151759/v1), 2024-04-03
Supplement: Supplementary file 2 [file 30051fc5c40286e7fca25d74.xlsx]

## Sheet: Sheet content
Supplementary Table 9: Differentially expressed genes of the pig endocrine progenitor subpopulations during 1° transition and 2° transition
Sheet1: Differentially expressed genes of the 1°NGN3 comparing to the rest of progenitors
Sheet2: Differentially expressed TFs of the 1°NGN3 comparing to the rest of progenitors
Sheet3: Differentially expressed genes of the 2°NGN3 comparing to the rest of progenitors
Sheet4: Differentially expressed TFs of the 2°NGN3 comparing to the rest of progenitors
Sheet5: Differentially expressed genes of the 1°PEC comparing to the rest of progenitors
Sheet6: Differentially expressed TFs of the 1°PEC comparing to the rest of progenitors
Sheet7: Differentially expressed genes of the 2°PEC comparing to the rest of progenitors
Sheet8: Differentially expressed TFs of the 2°PEC comparing to the rest of progenitors

## Sheet: Sheet1
Sheet1: Differentially expressed genes of the 1°NGN3 comparing to the rest of progenitors
Gene name	logFC	logCPM	LR	PValue	padj
FBLN1	1.91565e+16	7305791866537384	9758666865202162	1.78479e+16	1.67439e+16
NDUFA6	-1.11524e+16	785151555636682	4647296770298242	3110249022747278	1555124511373639
SNU13	306204029045444	8155929548167444	6967977392752589	4.03862e+16	7365014730905977
ST13	-274598795091084	9357301291406476	8168679058904722	3660975108917364	7021048154088095
TNRC6B	801075683129722	8050175455899605	3.25593e+16	711656955073901	2.76719e+16
ATF4	-1.3457e+16	7713999413465719	3.81289e+09	9984420010589776	9998942974100888
ENSSSCG00000000097	7054738600073222	8176211387192014	3744894634018292	8465538567825973	957316252295201
DDX17	-1.7129e+16	9030843220171118	2536657861322733	6145056310439763	8693865727011556
KDELR3	-8148187386018291	9425698983631244	7226953586639685	7181697487713082	529177709620964
POLR2F	384258591965187	8293386473225588	1176081362735859	9136408942607492	9735517725729296
EIF3L	-8142307324182085	9005649796288903	6549686956563251	1.04903e+16	6923493151196607
EIF3D	-2.69807e+16	765286706144566	3.07327e+16	5793252093801794	8468850450376919
RBFOX2	1.30473e+16	7512205150803432	4551258705354079	3.28946e+16	1618056542212249
TUBA1B	-2.26412e+16	1.15969e+16	7324283731499035	3.92097e+16	7222842954431126
GPD1	6973886692828636	7401187732887712	1731189767436308	1.88259e+16	4.95849e+16
SMARCD1	3.00805e+16	6630796227128511	1.01859e+16	9745395733495164	9947627725721368
TAMALIN	-3.61699e+16	6803797632897964	1.6615e+16	4.57864e+09	6944268642559719
KRT8	-8545029687395024	9826100894100628	6598717324319461	1.02052e+16	6835677991818277
KRT18	-1.24643e+16	8395348394308247	1.06552e+16	1.09763e+16	1.09469e+16
PCBP2	5183469191531827	8509814165119714	1.3794e+16	2.40203e+16	5799121724266563
HNRNPA1	-2.47188e+16	9932552424848908	8375109849278028	3601096019827104	6987201232500352
NFE2	-4.75653e+16	785850816532216	1043868704087811	3069234175713363	6461551842970001
COPZ1	3849327280957021	7249710612636241	4965843365028719	4.81005e+16	7872560446774518
PPP1R1A	3185036247972262	7.57175e+16	1790996718141468	2.31605e+11	3.76358e+16
BLOC1S1	-4590211107783514	754957108973183	3269275665185791	5674738735525403	8406075767152044
CD63	8315188578986511	937760043769985	6058073473344448	1.38429e+16	8569390511412316
ORMDL2	-5283281173635339	7503462214939624	1.00019e+16	3.17264e+16	6555697189494661
NABP2	-4.81124e+16	6981110928251295	6882868434839535	4067477006820458	7386148508175873
ENSSSCG00000000394	-7128932329313523	8940278340143653	4807795017495723	2.83313e+16	1.46933e+16
ATP5F1B	-7496929263022788	9857907587105432	6549339434416801	7980151033669934	9326795317256922
MBD6	3.48414e+16	7326327937654615	4.25029e+16	5144384677867802	8099290755812629
DCTN2	-5971910426084217	7.34178e+16	8628651713337989	3529381339890726	6929313957498513
CNOT2	-8030479062159537	7360163367098864	21767192725462	1.40113e+16	4.15996e+16
NAP1L1	4.94761e+16	9697195531125274	2.77838e+16	9554490449710352	3.32489e+16
ERGIC2	-8839938319903407	767259904917751	3492242927065342	8517582976859802	9580964782376292
SOX5	1.54202e+16	7309442443494488	6358305735921963	1.16833e+16	7594148570849407
ENSSSCG00000000576	3.61376e+16	8733355349851422	7447657117890978	0.00613622	0.697995
ENSSSCG00000000611	-3129798645821748	6.66142e+16	1.1318e+16	7365526262524548	9220857956722568
ATF7IP	1.96351e+16	7124045920298606	1.42678e+16	705633574954849	9055917535551354
TPI1	2.18792e+16	8424968627095001	3.71581e+16	5421438949304725	8287370595065584
MLF2	4.72897e+16	7173064303920538	6138672915972245	4.33335e+16	753266903766336
GAPDH	2.06843e+16	1.06928e+16	6623674965107949	4157253701857874	7423072253493692
ENSSSCG00000000697	-3988798039581903	8114688999734966	1.13955e+16	2.85747e+16	6319062642665672
FKBP4	4.09884e+16	7114953100793235	6061888645156681	4362263891779093	7545412207792015
ATP6V1E1	-8579542484136221	8052281644170979	5108548057081398	2.38082e+16	1.28961e+16
KIF21A	-4511570092988304	6846488844795447	3.937e+16	5303608926652694	8193679682843386
AMIGO2	-3241266075775109	8231434378874853	6888892113111122	1.04168	8.61756
HSP90B1	3538187829071466	898928658774265	1.16921e+16	2.79564e+16	6227750508793278
ARL1	-6564885438945837	7205145140089945	1.52486e+16	9017228565544328	9700223139444228
SLC25A3	-6596332631253223	10202944791823	5377706419842809	81661659857315	9422172799718962
SNRPF	8181136934081435	8348392432853213	5002439630337675	2.53116e+16	1.35094e+16
ENSSSCG00000000905	-3.89116e+16	8746364165790201	1.18774e+16	2.75786e+16	6201783612514343
ENSSSCG00000000908	-3192694221251611	8864630724734853	8982875469101306	3.43241e+16	6819859852884068
SSR1	1.36607e+16	7438745016123689	6942480326251306	7921761136257292	9326287528300124
DSP	5095418224319416	7281669279861161	8171470639704086	3660156198619666	7021048154088095
ENSSSCG00000001038	4325872868512724	8825613630677056	1401010877686299	2.36554e+16	5725119547622195
JARID2	-4042446693946716	7718395554701215	4398858527135703	5071775545348572	8054652262246424
DEK	7749597610655606	7989842047160559	2.68521e+16	8698364965111446	963543775806624
SCGN	2208523395277103	8884730273134819	3061346408587122	3.14901e+07	9.88137e+08
H1-3	-3.08373e+16	704949691630058	3152310801326301	5744877855683073	8431998143018703
TUBB	-2180069027457351	1049352467889646	7.2329e+10	9932143565002700	9998942974100888
DDX39B	-5.44453e+16	7373439117036667	1.05407e+16	918226549929287	9761520565837046
PRRC2A	5369407074004765	7018425774082966	9523948597125384	3.2911e+16	6685056110011978
BAG6	-8575929038947298	6874461580830163	1.81852e+16	1774901252757541	4.80702e+16
ENSSSCG00000001414	-8529347656989361	8313857652808363	4794208678402937	2855557109578112	1.47227e+16
RPS18	-2529170150997677	1260917671759925	8.71876e+08	9992549809119340	9998942974100888
PFDN6	-3609162239835412	7723932957361557	567479199320611	4512623577483241	7658605037276512
CUTA	6519620798057421	7233604429018388	1.24256e+16	2.64978e+16	6081467211612493
SNRPC	8268738774731634	7130805419969431	2.25039e+16	1335811612594652	4056106170411098
TAF11	7707277618311663	6816272533151845	9042203250223896	3416526018065479	6812049832568359
SRSF3	-2.26517e+16	972770260954235	6373343880617577	4246777053513947	7504013822713965
MTCH1	-1.1179e+16	8593318859400041	8183458541947886	7748264620676526	9293438044979946
FOXP4	-1.06752e+16	6882473395053581	2967649009626655	8632263242467128	963543775806624
MEA1	1833136488618296	7495810458916354	1.06277e+16	7444227347100044	9233722389162312
ENSSSCG00000001696	3.27297e+16	7912569201820042	6192933104338687	4.3131e+16	7522109175624809
HSP90AB1	-531304004820295	1.10616e+16	4432476223353819	3.52613e+16	1.70227e+16
CDC5L	1.0046e+16	7373999786873434	2523351411762759	1.12172e+16	3665371407342474
RCAN2	5.90169e+16	6889095438250995	7952235331880608	9289425895463104	9789667127818676
IREB2	-1.1971e+16	7307825959275538	4017179407208804	8411450613245632	9533022297676788
MORF4L1	-2.22101e+16	8839345396370891	3.71682e+16	9513865202543916	9862088342789
TMED3	2.73907e+16	7556514318900906	1.8328e+16	1.85954e+11	3.13366e+16
ZFAND6	-1.64153e+16	8527094006248133	2.3345e+16	6289771367874136	878538844228744
MFGE8	109439703317639	7142993225246778	3.61447e+16	5.72791e+16	2418746999019578
IDH2	-1.34937e+16	876199242285522	1.5705e+16	7.4028e+10	1.03639e+16
RCN2	-7655097021846612	853261306233818	4.59028e+16	3.21537e+16	1.59454e+16
TSPAN3	-5096229310161478	9016801087339166	2.38113e+16	1.22809e+16	3900725858521017
NPTN	8849269223363085	7.35139e+16	2.54724e+16	1104870422392922	3.63367e+16
ENSSSCG00000001930	-112131678113035	1.05435e+16	1.86489e+16	1.57135e+11	2697974351567623
PSMA6	-1787339332595339	7989433727626136	1.96188e+16	6578157615086988	8856775841769327
ARHGAP5	-6316794969851927	7586842073737541	1.38494e+16	9063185357391156	9700223139444228
HECTD1	-6521572496656147	7311091010724314	9683692378102036	3250872232682711	6662823720137989
PABPN1	2.90464e+16	9084715437462136	8871086403751394	3.46262e+16	6843936127927955
SLC7A8	3.69125e+16	7217438781797036	2828523447055339	1.04692e+09	3.02442e+10
ACIN1	-5656344403892963	7137766884076753	1.11e+16	2920823952267664	6376325088678152
MRPL52	-1.14296e+16	7202681395392759	2.31225e+16	9878677606849188	9975374555112776
OXA1L	-5803347323888979	7845657220386353	1.18849e+16	2756334772297322	6201783612514343
DAD1	1.2547e+16	9051014926933226	1.57835e+16	6911573906260308	9055917535551354
NR2F2	3.57707e+16	8303538737445743	5388422039442242	212.659	117285
ENSSSCG00000002266	1.3953e+16	7909563432062763	1109910651283284	7390186311949156	9220857956722568
ERH	-3.5838e+16	9681232812056018	1358303924722268	2438316426187387	5831453213746444
NPC2	2.64133e+16	7122371163319681	2.54558e+16	6138839856079683	8693865727011556
YLPM1	-47285260881716	6960479298751171	6817732468212189	4.08977e+16	7396745306607347
GSTZ1	-1552306389415926	6.32848e+16	2281760291230972	8799323562870617	965216973921262
AHSA1	-3029437419249344	7840072829310678	4896693966155192	4.84075e+16	7895249822385333
ZC3H14	-3.38959e+16	7203602705020477	4304032442176433	5117911487772419	8079734895378387
FOXN3	-1.13166e+16	717369244339491	4242474808926766	8368122458939782	9516836341199512
ENSSSCG00000002449	-6474996838630708	887852435496015	3561192859183081	5914522173109791	2.47868e+16
CHGA	-1.17127e+16	1.20565e+16	1.09704e+16	7404809441959345	9220857956722568
ENSSSCG00000002459	1.22379e+16	7435456239814185	5295907412809253	8179920077835651	9422439583329674
DDX24	-4297650526396918	7017568124916722	6280028777867557	4.28089e+16	7517155586826595
SERPINA1	-1.6042e+16	9295995675278812	2.93169e+16	9568195975231960	9900009479773828
GLRX5	5869517941393716	735232246981326	112070934629996	2897657646108957	6376325088678152
PAPOLA	-1938694998113092	8335709850970138	2.97574e+16	5854075423088431	848008326500817
HSP90AA1	-7516036642780031	1.01407e+16	7621061159216364	576905316878791	4485235381613907
ENSSSCG00000002547	1.24955e+16	7207004134814764	4187021898242582	837867358458779	9516836341199512
GSTA4	1.88803e+16	783204827187746	1708573436870524	6793509806022284	8959556410840984
ENSSSCG00000002639	-3203201438221368	9276011800085348	8317353416395085	7.51572e-05	0.00977044
TRAPPC2L	6158048388179226	7369101703490173	9138463854383514	3390959150744051	67744738247576
APRT	9940347152146760	7.07133e+16	3308871013465324	6890681669749434	2.72498e+16
MAP1LC3B	-8568627224150482	7551032751894654	2.51494e+16	8739953434376423	9641543041294024
GSE1	-1823558838271034	7.57318e+16	1.20238e+16	5252677452080473	5623454683992037
CMIP	1008519667454215	7615435290268032	2.64678e+16	8707631997194525	9639835909302940
TERF2IP	1084998001130513	8143165910252893	8234914324911613	7741388100222694	9293438044979946
KARS1	-1.03387e+16	8963783766553483	7292231516375658	787128464323898	9326287528300124
GABARAPL2	-5406076022789794	8568080964179511	2.56572e+16	1.09203e+16	3606813875657968
IST1	4.0399e+16	7191277768482284	5221190108152411	4.69939e+16	7818392470700721
PDCD5	1.60058e+16	7.68337e+16	7012085596012296	7911608952803394	9326287528300124
LSM14A	6771498985995463	7702449838524323	1.97737e+16	1.59668e+16	4.47069e+16
GPI	483513771598604	6941668062504564	6023288738352344	4376908322815217	7545412207792015
ENSSSCG00000002907	-1.84056e+16	9586969385639414	4.29349e+16	5123084653443218	8079734895378387
APLP1	861042249948768	7130585039041422	2.75566e+16	8681554404730631	963543775806624
SPINT2	4.35444e+16	8256581273739032	1.4431e+16	2.29638e+16	5617495788329911
ENSSSCG00000002963	-3.02673e+16	9275674349444262	1.04582e+16	3064713475460138	6461551842970001
ACTN4	9387195373240266	7184006360932678	2.68907e+16	1.01039e+16	3443646196689087
ENSSSCG00000002972	1.28825e+16	7261890141714135	5.22335e+16	2.22856e+16	1229083265596993
ENSSSCG00000003042	-638813054878398	7738788928569499	6646211989309707	4149332112875047	7423072253493692
ENSSSCG00000003046	5568600129424849	8718088815283648	2856412393852015	9101027449850268	324146183145352
ZNF428	-5049351270663066	7504700249146436	9378815037290148	3.32823e+16	6727352886215824
ENSSSCG00000003086	-4952165847344362	7241409526376696	8421241908936516	3.5879e+16	6976471387290364
APOE	-1.45153e+16	7047653710312222	7268845270698791	7016089597073924	5190765474257944
AP2S1	5442825312597753	7749243854730818	1.25661e+16	2.62293e+16	605036086712724
TMEM160	704345822028183	7147985888011128	1.82305e+16	1.76951e+16	4799562939460626
ENSSSCG00000003132	3.48933e+16	7916054238582642	6928208612940464	4052065553506634	7374759307382074
CYTH2	-4.27865e+16	8242901514158437	1476337921977041	2.24348e+16	5540217513322089
ENSSSCG00000003165	-3869873329901941	1.28568e+16	2.1559e+16	1.42023e+16	4184512953599616
PTOV1	-4446195097153747	8778845724091838	1.81343e+16	1.78098e+16	4.80916e+16
ASPDH	-1.48566e+16	8027588116324106	1.31009e+16	2.95158e+16	3.39669e+16
ENSSSCG00000003261	6996215624256767	8323174191154202	3.50577e+16	6115549748902929	2.51248e+16
SDF4	3.4018e+16	7.36303e+16	4.0596e+16	9491971791382202	9862088342789
RPL22	-3.0356e+16	1.14271e+16	9634081458930056	3263296890419391	6670080960464299
PARK7	1.08435e+16	919906437782217	1.29748e+16	718693722701045	9142416649164116
MAD2L2	-1.85843e+16	7.69732e+16	1338001631774473	2543195164530479	3.02524e+16
MFAP2	2165699863166438	698567286084103	1.02967e+16	1.33268e+16	1.28332e+16
ARHGEF10L	-3.59018e+16	6770642789608298	1.93589e+16	6599464364983492	8857688159491117
CAPZB	-8953692945783394	7895721964317889	3145713548088631	7612669711494023	2856713170086417
DDOST	-1057434383632355	8387649613056796	7745974904947328	7807698594603577	9311934103655642
HP1BP3	9095864902504198	7445577513597633	2623574161764708	8713259275172046	9640201751254178
EIF4G3	1.28489e+16	7962414696414927	821948446955007	4144297196338274	3412950632278578
CDC42	4854358255493448	8622791133401124	202620704431306	1.54606e+16	4407593131879525
ARID1A	9850972597213454	7924594350536439	4768234278182883	2.89895e+16	1.48715e+16
NUDC	2171466912584592	7.22301e+16	1.60202e+16	6889703769738715	9047085758242758
EPB41	-4195210573368455	7000351002849516	5820758342745647	939185283146564	982174791481784
SRSF4	547738421386354	7890586312053477	1.5232e+16	2.17136e+16	545838057088843
PUM1	1.34333e+16	7204837300607907	5.93844e+16	8074716024985104	9369670386487968
SNRNP40	-2896539386247337	728831447109516	2.1e+16	6467676246750146	883058572324476
EIF3I	-7633303597524624	8144120637684145	3.98874e+16	4.58054e+16	2.09859e+16
HDAC1	-1.00708e+16	7402599916729969	3921282452658209	8430276296977967	954766823926565
AGO1	-1.18691e+16	7705014629777352	6261322122440748	1.23402e+16	7912111482411466
SF3A3	-317232689709891	6880358046992668	2.45811e+16	9604575786657652	99038685165535
AKIRIN1	1.37797e+16	7.79917e+16	8926843300351073	765109259671944	9283408804427532
NDUFS5	-388954455558657	9264659746161448	1.43691e+16	2.3064e+16	5628030077553009
MACF1	8049829842483972	7218632599822907	2.17347e+16	1.40409e+16	4.16196e+16
HPCAL1	-2.90045e+16	7378354537492554	2.47778e+16	6.43337e+08	1.54062e+11
CAP1	-8099174907925044	7367347570215633	2.00652e+16	8873550633511664	96532349987993
ANKRD12	4.30921e+16	7084139916136185	6432299319708945	4.22544e+16	7488114545054664
MYL12A	5015770259429326	8791824279184969	1.5244e+16	2169552329863587	545838057088843
SNRPD1	3130434002052986	8774774328440772	9167154888342404	3383388580760943	6766777161521886
NOL4	-7238437509964516	7665503584835863	2.27806e+16	1.31216e+16	4.02414e+16
GALNT1	-1.33452e+16	7255385148494002	6120105597262615	980263268985962	9955798825638676
ADGRL2	4.46469e+16	6829187119351355	2.09902e+16	4.6165e+09	9.233e+10
FUBP1	-1.43794e+16	742415539959486	7909221258983745	9775637806046862	9955798825638676
SRSF11	-2209084390908851	7949193940006048	271784972893228	6021369030949314	860195575849902
DIRAS3	1.83008e+16	1.09741e+16	4.84959e+16	4.86184e+16	7907557268166479
SERBP1	5742471299566153	9527216934147628	3.98555e+16	4589214134500182	2.09859e+16
JAK1	-591705210241924	7769958567440281	1.29049e+16	2.55958e+16	5964499434040827
USP1	-2632493820645398	7084337187117006	2427729149679423	6222105038177306	8746057964867706
MAGOH	3.83885e+16	7961080016979087	6214956282631814	4.30492e+16	7522109175624809
CZIB	2.45243e+16	7.39286e+16	1.7878e+16	6724241304739925	8920433084394523
TXNDC12	4093855492674234	7111672321537173	5564243526077879	4557045235265467	7665270173921581
CMPK1	-62775915136313	8361554469659291	3253497199251421	712712404944245	2.76719e+16
LRRC41	4.07415e+16	6.71572e+16	3.246e+16	5688559986004786	8406075767152044
PRDX1	-3132000276979066	8194493273242838	7224282643481406	9322647455225172	9809869159496380
RPS8	-2.1739e+16	1.25905e+16	6621944076719144	4157863021976794	7423072253493692
HYI	-6460925500725542	7971386385142439	2.70431e+16	1.00078e+16	3436299885128118
ZNF606	-7134394807801228	7000225796440567	1.5329e+16	2156784194943832	5451871159441354
RPS5	-4908339052086116	1.17334e+16	3013943647155429	8255122377823394	3.0291e+16
QKI	1.78393e+16	7351220980150489	5546750418458248	1.8515e+16	1.05634e+16
MRPL18	6905074624930217	7673967227816086	2065948461613465	8857104617911737	965216973921262
WTAP	-808053307656784	7.20688e+16	2.11046e+16	8844943759849357	965216973921262
ARID1B	-625082238643904	8554307657493034	3506994116371798	6.11102e+16	2.51248e+16
PCMT1	2750323704253938	7635034328156911	2.59696e+16	6103293311778767	8678120177685433
CITED2	-6981520944614686	8282869946420034	2358534437637706	1.24599e+16	3.94121e+16
BCLAF1	-1411885197006268	7901810424605758	9635779092346808	7562449984677522	927071131244526
RPS12	-1.14722e+16	1.31914e+16	2.01687e+16	6533628912448565	8856775841769327
KIAA0408	-7276490363408713	8137323128287562	2.00784e+16	1.56487e+16	4422471992777785
ECHDC1	-1.75694e+16	8186450792374876	2.33347e+16	1.36121e+09	2.98481e+11
RNF146	-1.96899e+16	799888550728424	2.6074e+16	3.28586e+07	8.66705e+08
PKIB	-251070672290432	961933101477871	6697630982178848	2.7479	208.382
SERINC1	-5116989301649111	7.48376e+16	9327481540938828	3341498356669838	6727352886215824
ENSSSCG00000004253	1.61586e+16	7354449372077515	7808018582500633	5201490540479806	4080479648135021
SMAP1	-2.3853e+16	7686740392476765	2.46461e+16	9604053930510444	99038685165535
SYNCRIP	8917095757602167	7612643866413175	2754463770948501	8681838859901054	963543775806624
SLC35A1	1.67675e+16	7535614549727998	8102590740479698	9772912427510180	9955798825638676
ENSSSCG00000004324	6440127436592015	7065197543255318	1.52713e+16	9016500146476048	9700223139444228
SIM1	-2676703924691362	8180587627561291	4.23656e+16	75711.6	3.28084e+07
SEC63	-3.71423e+16	7514484446774074	5149085846393368	4.73022e+16	7858658738173757
SNX3	8946178351922979	794249570631923	3631208353650672	8488724488895799	957316252295201
GTF3C6	-1110555952947925	7865203505636506	5886416368380173	1.52581e+16	9192756405611464
RPF2	3434765257221072	7306078251820238	4.17335e+16	5182696589527583	8103017655475401
CD164	3.16301e+16	7774256622939911	464720174660199	4954262160321358	7985353771311832
SLC16A10	1724072094344264	782877145965919	9930534346522888	1625593363012429	1.53294e+16
HDAC2	-1162295982709445	89664673099744	1.27369e+16	3585165967386996	4027779049780452
RWDD1	-3.64597e+16	8036536562913197	6329421025463273	4262781807030376	7510419059821185
HMGN3	3651377055989229	9180099697110636	1288758638638682	2562768438142817	5964499434040827
PHIP	-5547833297407814	7996291319172641	2.01198e+16	1.56062e+16	4417294816350792
MYO6	-4845261279964247	6783402712824597	4.36672e+16	9473132165606864	9852057452231140
COX7A2	-2.41206e+16	9960601770715686	7969495921205461	372006959066833	7056945532647751
ENSSSCG00000004489	-6115543104923616	1366057728781681	4.2833e+16	3848860979355527	1.81946e+16
SETBP1	-1.29131e+16	7838537955517089	871371159637728	3158255423719195	2.72418e+16
ATP5F1A	1.28871e+16	936105145444008	1959232035891958	6580318399554008	8856775841769327
TCF4	1568089005730382	8288024873685286	1.58651e+16	6.80201e+10	9671613587951008
TXNL1	-2.21115e+16	7253183943458742	1.42631e+16	7056794883857306	9055917535551354
OAZ2	-2540690512442477	7328553312525346	2.15898e+16	6421834657862326	8812207105972734
ZNF609	552468777581745	7401024686086119	1104322056016136	2.9332e+16	6378035538655462
TPM1	2.571e+16	9061904152947112	4.47178e+16	227574	1.06201e+07
RORA	8905498326017353	9097211552215128	5465136491885188	1939953879618883	1.0965e+16
ANXA2	7680359713874717	6660176928355967	2.21175e+16	2.56455e+10	5.42731e+10
ENSSSCG00000004583	548411250363	8287714389682339	2.93451e+07	999956777678854	999956777678854
MYO1E	-5490949427036487	7373626705096764	1.05003e+16	3054993788049109	6453104643430253
SLTM	4798400089149319	7285722545249032	8640871306476366	9259382886597412	9783434065344424
ADAM10	2510347947459426	6933261166756125	1.80718e+16	9660914207328052	9906925260182964
TCF12	6034597949884424	8845782240393248	3.19561e+16	7383618218096316	2817229592648909
MYO5A	1.21378e+16	8191290462208913	1.12869e+16	7369007387903659	9220857956722568
MAPK6	-1.11368e+16	6780534899746127	2106169732880404	1.46706e+16	4284075023625356
SCG3	586134606039533	7.16167e+16	1.11092e+16	2918813504171597	6376325088678152
COPS2	6623065470870516	7357376001843028	1.48227e+16	903098048409402	9700223139444228
EID1	1.47494e+16	7933248022144576	1.04701e+16	1.21319e+16	1.19352e+16
MYEF2	1.62517e+16	7595562488705404	1.11145e+16	7388445827934709	9220857956722568
C15orf48	-1.23582e+16	8075742207105664	8817649771936583	2.98331e+16	2.61039e+16
B2M	3417329071529549	8456422477268704	5696330146307225	44.4021	26068.3
EIF3J	-1.62339e+16	7693057004313421	943274939883958	7587460878083045	92803620955048
PDIA3	2.4941e+16	845954744697221	4.47192e+16	503671444918329	8049557961590905
UBR1	-6097951468816591	7027656751671209	1.15561e+16	2.82379e+16	6275084506493803
RTF1	-4.86033e+16	7565551507449512	8289297985192179	3625821715528895	6990461358329013
IVD	6730282234905798	6.41952e+16	2.21916e+16	6375839793164337	8804270427586566
SRP14	1.98932e+16	8306499491409033	2994620483227869	5842198648179528	848008326500817
MEIS2	3.12924e+16	7398798826870573	2151006332409618	3.51977e+10	7.19773e+10
ACTC1	-4564999983763885	1.03241e+16	1693206896586839	1.04121e-22	6.31665e-22
SCG5	1.49256e+16	8648991026930194	1577633640574884	7.12886e+10	1.00578e+16
UBE3A	3707808416670467	7467811096977532	5035599420841295	4779400770283492	7862478081235228
NDN	3520044397860717	7454633999024731	4323453349497509	5108403664787825	8079734895378387
CYB5A	1.28783e+16	7939816487177398	8729554190752017	3130930410005394	2.71347e+16
VPS4B	6391219355578155	7.08516e+16	1373536292549883	2.41205e+16	5799121724266563
LMAN1	7322605326074697	7335396854053209	1.73447e+16	1.87841e+16	4954642776534871
HACD3	2277076785636801	7379383210342608	1.95265e+16	658569857242614	8856775841769327
RPL4	2792239195394239	7453059791725795	2.83329e+16	5945274700362074	856044300210362
ENSSSCG00000004963	1.0376e+16	7758245700616647	4749282506468755	8274848318035609	9496421904211908
RPLP1	-352382654243619	1371067097755496	1.88274e+16	1.70024e+16	467436448662722
RPL36AL	-4.93445e+16	936459972797644	281861314694011	9317687909147000	3280114505734534
KLHDC2	-2360451621071204	724799258722138	1801320732481584	6712597634516942	8920433084394523
RTRAF	-2904694807413383	971433582517881	1.11411e+16	2911899355106506	6376325088678152
PSMC6	-451115613744542	8541047879421564	1.77376e+16	1.82917e+16	4874215487312769
PSMA3	-1.447e+16	8229773517431015	1.68465e+16	9672604534065968	9906925260182964
AEN	-7335538784855549	7024077326470976	1.80475e+16	1.7914e+16	4.8283e+16
RPS6	-3.7795e+16	1.2489e+16	2018829792298739	1.55359e+16	4413968674108081
PSIP1	1.57984e+16	840628029313288	1.51877e+16	6967483421647003	9055917535551354
NFIB	856224727453921	7315036458187596	4404084800875679	32159.4	1.46325e+06
MPDZ	255600349078766	6656646549299846	8418064364294572	3.71511e+16	3130325001364684
PTPRD	4.68287e+16	6676129758987423	1.56268e+16	7.71545e+09	1.0638e+16
RFX3	-8844778103176406	9056516997926704	7308434534002753	68631691249542	5098354207108835
ENSSSCG00000005255	4266641383951424	713182975701839	6408461975065438	4234045428342053	7496072645508304
VPS13A	6696174286337846	6960674696858681	1.06736e+16	3015434336707293	6442811741176322
VCP	-4.84285e+16	750008554399225	7540819082878079	3851869437223696	7192043646177576
TPM2	5447077436557774	7348314518792704	3315275419401918	8.51956e+06	2.87141e+09
NANS	951326705832677	8622082334859686	7087251673474762	776342129459075	5.62925e+16
SMC2	3.33444e+16	6915754055388782	1.77682e+16	2.49515e+08	4018738196946361
NIPSNAP3B	-2.43068e+16	7409083970731737	2232019873012075	6366109208393463	8804270427586566
FSD1L	4.73364e+16	7057103776234117	7681389008954551	3.80793e+16	7137425486403337
RAD23B	8325971163278962	8038547159918341	352042207753561	6.0617e+16	2507339903662793
TXN	151151674684421	9199053566269016	1943733716139937	1.03955e+10	1.87324e+16
PTBP3	8885702802556816	7161591361280687	2470837025220966	1.15976e+16	3.74914e+16
ZNF618	5878433899742959	7.05744e+16	1.18661e+16	2.76013e+16	6201783612514343
AMBP	-5469981262858999	7876765676477723	1.53469e+16	2.1541e+16	5451871159441354
ENSSSCG00000005488	-1.56316e+16	7815668604543278	1.12737e+16	7370490644747275	9220857956722568
NDUFA8	-5956650690072707	7.52071e+16	1.31509e+16	2.51476e+16	593626569416414
STRBP	8315615930702923	7.28109e+16	2.22493e+16	8814256877685674	965216973921262
PSMB7	-4267578744819712	9004819363554796	1477267443053739	2.24203e+16	5540217513322089
CDK9	2.42754e+16	6845751688840055	8.46785e+08	9992657792188156	9998942974100888
SPTAN1	8018031200372275	6750938415311654	9282338972748104	3.35322e+16	6729050426610714
ENSSSCG00000005656	1.907e+16	9142990402516200	3.78415e+16	5384526012823575	8262931992697223
ZER1	-1.22568e+16	6.69764e+16	2.9869e+16	8627878153248958	963543775806624
MED27	-6710349002716137	7102361137217164	1674492109046044	8970394322671453	9694844220464396
BRD3	7418072957199776	7373255085970642	2.02912e+16	886726802415577	965216973921262
ENSSSCG00000005768	8577011725811587	7.5065e+16	2.2723e+16	1.31704e+16	4.02414e+16
TXNL4A	-2958470653123874	7088754102470008	3.29848e+16	5657487767399164	8406075767152044
SNRPA1	3648738604059116	7116478349969398	4727601205677877	4917201170030968	7962016129409575
MAMDC4	2.20228e+16	8490786064520101	4193427339337602	5172651895522024	8103017655475401
VPS28	5991819563850931	831287899325425	2.74418e+16	9760896209912436	3370935692986837
GPAA1	4535202479758254	6988164218911654	6023832097094748	4376701656290196	7545412207792015
CHRAC1	3.13107e+16	7381604293373586	2.17104e+16	6412553498082847	8812207105972734
ENSSSCG00000005959	3.93731e+16	7108577630404296	5712876519224371	4497476910618981	7653869073784212
MTSS1	1.45096e+16	8428496731061173	1134949011474891	754686859893781	7588564005561777
NDUFB9	-2.21417e+16	8356354777209651	3267107088250183	5676023913558677	8406075767152044
MRPL13	-1.03152e+16	7179137492236238	3.0584e+16	861171822606175	963543775806624
EXT1	1.59917e+16	8093944972394192	1.31134e+16	2.93188e+16	3.39669e+16
RAD21	5718509928975717	7745424732246638	1.31808e+16	2509374904364068	5931249773951434
EIF3H	-2.39463e+16	878391468093668	5318388653141193	4658347867385538	7782572512461817
TRPS1	8830394317798584	7.57665e+16	8922322160671321	3.44873e+16	6838373716469992
EIF3E	-3.39746e+16	8959674170377577	990387262133062	3196477426654797	6574485086933927
ENSSSCG00000006061	4722848577624464	812624601365574	1.34845e+16	9075552493012164	9700223139444228
YWHAZ	-2.04017e+16	8651846080741654	3214917554931347	5707125307388382	8406075767152044
PABPC1	-4.31615e+16	9606682855067914	2.34316e+16	1.25834e+16	3944504157502418
RIDA	-4026271140906591	7.11284e+16	5798557677509191	4463688609193531	7645486192634089
RPL30	-1.84929e+16	1016531421236376	4526891390775196	5010606837983353	8032978347580589
LAPTM4B	-3760697515208421	808071830622946	9885175128158176	3201049774254747	6575519852306592
MTDH	8808563598347119	7624554486828477	3.1214e+16	7727045172633337	2881807830777187
MTERF3	4296853871944829	7914635420659373	8096321957568575	3.68229e+16	7046364691801534
CDH17	1.81994e+16	6799034614587616	5811546069334408	1592129097627398	9438680643914868
RUNX1T1	-4270114800815233	9422728113924892	2.05759e+16	1.51449e+16	4379932461124006
ENSSSCG00000006156	-1.84294e+16	9904639208605532	2.39132e+16	1.00778e+09	2.29269e+11
PKIA	-2460884594875973	698779192026882	2017353351601448	7.07247e+09	1.34082e+16
NDUFB8	-2.16282e+16	8640872756451211	4.01917e+16	5261008716182176	81489666922992
ELOC	4406106280196744	8102326332288774	1302330967612296	2537878841697236	5944581070642174
KCNB2	-5157616005685246	767785858407374	1.07829e+16	2.99081e+16	6434131994171537
TRAM1	264429209416364	7048791020816338	2.28731e+16	6324667238353585	8804270427586566
ARFGEF1	-5721941188273005	7497684332866689	1.11016e+16	2.92046e+16	6376325088678152
CHD7	-9124170979170556	8161025478482383	4874404439858161	2.72578e+16	1.42555e+16
RAB2A	-2.79474e+16	8492664324873536	6710773261895145	4.12676e+16	7421648048174585
TOX	-2844148392227066	8900853504973249	7340542057168744	3915722108187764	7222842954431126
SDCBP	1.12144e+16	8105161317218878	8302030696260601	7732453562716377	9293438044979946
TCEA1	8254765235075137	7286838189537379	2.47783e+16	8749207527311371	9641543041294024
MPZL1	-8734015993069068	7689925980871866	3.31096e+16	6881931355388522	2.72498e+16
MGST3	9001105903159822	8126029618520718	4763813354193246	2906408783219221	1.48715e+16
PBX1	4189944094166655	8971266228973107	8876206275388779	4.45274e-05	0.000623383
RGS4	-2.22018e+16	7979258183564844	2.70395e+16	1.99343e+09	5.42113e+09
PFDN2	-3.14707e+16	8377516760486241	6651392955291082	414751420365219	7423072253493692
DCAF8	-2528506792194435	7830000109622496	3.37888e+16	5610507592069476	8404948711255952
ENSSSCG00000006395	9300184461110418	7630816583845772	2.77857e+16	955333339303066	3.32489e+16
CRABP2	2.06173e+16	8923483197476731	2.69391e+16	2.09963e+09	5.6196e+09
NAXE	-6292563582042979	7466092410055643	1.49788e+16	9025919286334676	9700223139444228
CCT3	-6587965147391137	8712521707273526	404698232018416	4425037964497003	2.04304e+16
LMNA	3098158784847474	7037090982427607	3.19519e+16	5718966474797088	8406075767152044
LAMTOR2	6746279614728606	7304825015008069	1.09308e+16	2.9579e+16	6378426997813947
SSR2	-5887460510189388	1.03751e+16	3.15597e+16	7564962777006688	2856479720778459
KRTCAP2	5285734828949513	867717567188029	2.32208e+16	1.27549e+16	3956164972747604
FLAD1	296446947520154	787417126124296	2.70373e+16	1.99569e+09	5.42113e+09
UBAP2L	4196500437077649	72091219117599	6110500066590933	4.34393e+16	7536651885469916
TPM3	9584219180185736	8343601873171059	6.82497e+16	8989188551306653	6268323051102724
ENSSSCG00000006559	3.78962e+16	6974908071052396	4097496181941749	5220966166208931	8113719296513558
S100A11	1.17477e+16	9693775176418464	1523302488351	9.5027e+10	1.2624e+16
S100A10	1.20974e+16	8058947457048205	7.07438e+16	781937157923337	5647323918335211
CSDE1	-7671054849933786	9062036233532618	6035912848956679	1.40177e+16	8648208320018815
CAPZA1	-4074790782119972	8190250519910503	1.29438e+16	2552415624180414	5955636456420966
RAP1A	9832588703585816	7151983184068973	3121982638967861	772427478970019	2881807830777187
GSTM3	395678187244829	7276497295074629	5701286623170185	4502077939383975	7653869073784212
GNAI3	7714285246755501	7464317023330726	2201728325654588	1378560955620362	4.12661e+16
PSMA5	-3862263675700817	7339250301934051	5013751522204843	4.78897e+16	7862478081235228
SORT1	1.67933e+16	6836279430091718	6329227149877159	979928973140135	9955798825638676
ELAPOR1	-5560532680480862	7.02964e+16	1.0938e+16	2.95632e+16	6378426997813947
DPYD	-4812657438706339	7188089210579931	5083881008045097	4.75837e+16	7858658738173757
PTBP2	-1374911612786468	8524177771824673	1286463215200886	7198397284753942	9142416649164116
CNN3	1.38309e+16	8735983949409757	1839860971592644	6679697963743493	8893233572796749
MTF2	-2.02013e+16	824938894336804	2.99665e+16	5840927476384993	848008326500817
RPL5	-1632418075212583	7961573231200631	1.63171e+16	6862539895407127	9024438301763708
EEF1D	3.48379e+16	9099870187786304	9414148703597104	331914238654092	6723378183542418
CNOT7	-9644995648123192	8064449707465661	6411043848886422	1.13413e+16	7398249344765499
VPS37A	-1487851438566063	7381474876535604	5.70408e+16	1.69255e+16	9803232613274416
SLC7A2	5313255539104754	8986049380614759	2152699933100201	1.42319e+16	4184512953599616
PCM1	2.85807e+16	739293399158626	2769203135754449	598726893692671	8579252704279825
VDAC3	5.71977e+16	7415977243564342	6748429311604465	9345283682253148	9809869159496380
POLB	-7168157710772557	7037739002317013	1.8615e+16	1.72452e+16	4.71264e+16
PCSK2	9276236202038036	7744728182760748	6628743725921113	0.389735	283.727
DSTN	-4.73094e+16	9084511525774012	1.51381e+16	21855884061371	5484109682634171
ENSSSCG00000007088	2520880106050156	7.61915e+16	2.00288e+16	6544882347599313	8856775841769327
ENSSSCG00000007098	1.06583e+16	7082910257397095	3547162834871548	5964735685544634	2.47868e+16
MRPS26	345207558393466	7669405755343478	3.86041e+16	5343880189459239	8235276837269954
ENSSSCG00000007188	-2461168971725494	8001031855928801	4102760351404955	5218294340764349	8113719296513558
ENSSSCG00000007203	1712578327151311	7405410131393086	1.09209e+16	7410465331506618	9220857956722568
NOL4L	3681112522063829	7662184385330156	6052820576661819	4365697491148344	7545412207792015
CHMP4B	-1.99132e+16	7683159377310917	1494453661001378	6990659506905758	9055917535551354
RALY	-523707485360544	8192424621948858	2.19913e+16	1380886919252351	4126788494317371
ROMO1	1765440242571821	8109262295423116	2.15467e+16	9629767312877236	9906925260182964
RBM39	-1.35046e+16	9199292857193520	2.00462e+16	6543485361140068	8856775841769327
SCAND1	-6686757971954385	9370578861149352	5212786238287212	2.24214e+16	1.22912e+16
DLGAP4	-1.70412e+16	6883242718886009	7092709727469753	7739813479202353	5.62925e+16
ENSSSCG00000007322	5043049339129776	7003393708221964	7949011292696935	3726222338942027	7056945532647751
ENSSSCG00000007336	-7339667682258126	7340168257154199	1.84401e+16	1744813234942161	4753832466459182
TOP1	-5388756221688761	8201663370139109	2.31276e+16	1.28316e+16	3.97169e+16
SRSF6	-6795220235757725	8272535075781406	3.81382e+16	5083127813273508	2234611743999465
YWHAB	1.85748e+16	9045291838931828	3508681022560778	5536221293597029	836187625353733
UBE2C	2883887276748069	7474897749915683	1984111132398873	8.41531e+09	1.56284e+16
PTPN1	1.68576e+16	6780724791179604	4318035051439573	8353860522776609	9516836341199512
RIPOR3	1512641247088569	7118314818056673	8160501855157798	7751340083670087	9293438044979946
ADNP	1.3976e+16	7108978003483808	627086730011793	1.22739e+16	7912111482411466
PFDN4	-5043665771960534	7953975709501227	1.65517e+16	1982562453294276	5132665241814484
GNAS	1.43707e+16	7414501549011716	6215598684753567	1.2663e+16	805848354777294
CTSZ	2428897435853582	7516440145607116	1.32136e+16	2779235285921445	3263360142178729
ENSSSCG00000007524	1359027959879187	1.11121e+16	3053592321255163	5805420071441018	8471080050740855
FSCN1	-1.07466e+16	731360429801268	2.64731e+16	1.03725e+16	3.49592e+16
KPNA7	-3577442221436248	7624571719232874	3.83613e+16	53567615518765	8248143844682936
ENSSSCG00000007609	2.18934e+16	8527622843966338	2.79845e+16	5968027812250978	8562003432997616
BUD31	4.32924e+16	7413529584746095	6797701194096557	4.09666e+16	7396745306607347
LAMTOR4	1.39523e+16	7985789936706544	1.19499e+16	7295789905156038	9206135810882212
GNB2	-3.23735e+16	9259281941525040	1.06164e+16	3028422502595348	6442811741176322
POP7	-6696512280430027	78697067869898	2.18456e+16	8824987108249522	965216973921262
CUX1	4269827106813321	7546226455800838	7006884957081293	4.02552e+16	7356205558357897
ENSSSCG00000007688	-7199171931250548	7840194143516255	2278984823072231	1.31138e+16	4.02414e+16
ENSSSCG00000007692	-524358408966496	7770737501887309	1.24679e+16	2.64166e+16	6070486154583986
BUD23	2.71304e+16	7424887902906809	2683414192349003	6044465383417517	8614664837760283
GTF2I	2.29075e+16	7786966321931027	2540264265953567	6142541082690899	8693865727011556
AUTS2	1.83077e+16	8588513034071617	2459020984874351	7.09111e+08	1.67608e+11
ENSSSCG00000007743	3.1176e+16	9417893402757444	1.11746e+16	9158124822485356	9747243963113068
BCL7C	-9524250867041504	7785112721769195	4103197181696454	4.28022e+16	1.99233e+16
DCTPP1	2936472796399357	707772735377831	2.87845e+16	5916051090224603	8538630439499427
RBBP6	9054743248809336	7116267917874525	2.65193e+16	1.03424e+16	3495474475977934
UQCRC2	1097782892876011	74765596155829	4.3911e+16	9832815966408808	9972778482085786
ZC3H7A	3.36523e+16	6596573094815325	1.46201e+16	7021926799502353	9055917535551354
RBFOX1	-7099701983818194	6999005905394304	1.63611e+16	2.0086e+16	5185330782663112
ROGDI	-884208269684643	6787996722468019	1.69538e+16	1.92893e+16	5038756603985016
PAM16	-8289544241099266	7472404081530937	2593283162772231	1.07318e+16	35880456416155
SNRNP25	6376499212889618	826602869648098	2468463313079816	8751554452866884	9641543041294024
HBZ	1.83101e+16	105897626206482	3.68625e+16	5437545043037334	8287370595065584
ENSSSCG00000007978	2460290337228484	983317370606925	6205450789335905	4308448033499466	7522109175624809
LUC7L	-5662380482284796	7358269500115527	1.01989e+16	3125443898334043	6508361435890113
ANTKMT	-1882988712539565	7446517074865258	1360587958229787	7122309719005449	9094072461256936
RNPS1	3.66735e+16	8384065982910313	9267338787799084	3.35713e+16	6729050426610714
ELOB	-1556553373621438	9659409023893938	2221563474804622	6374017789396542	8804270427586566
CHCHD5	-4886102231030486	6977396442867758	739139208839739	3899367597991175	7206612538012936
ENSSSCG00000008137	7235459113236129	710304783350421	1.67941e+16	1950026533984034	5070068988358488
MAP4K4	-4774772961533164	7640542885606443	6633422461162826	415382478584335	7423072253493692
TBC1D8	-1.64601e+16	6770830712863692	5.11112e+16	2.3773e+16	1.28961e+16
RPL31	-1.19795e+16	1124803509607047	2.39467e+16	6245914259479274	8758036660883999
EIF5B	-8149079257004068	8291285387056853	4915814558507206	2.66119e+16	1.39578e+16
ENSSSCG00000008183	-1.10303e+16	731569010887553	3590992304907181	8497016311588131	957316252295201
MGAT4A	2.76556e+16	7786795031239095	311761975788454	5766009739709594	8442588677611795
COX5B	1458909734924667	9289585205027172	2.38774e+16	6250928364004569	8758036660883999
ENSSSCG00000008222	1.41397e+16	7226263539857316	625577077424424	8024981155383459	934450780729232
RNF181	-6050844041687702	7335238992208103	1093075456220437	2957907904480754	6378426997813947
TMSB10	-4.18398e+16	1296320351019514	3006559310030149	8292814698863743	3.03681e+16
SUCLG1	-1.06777e+16	8332188614518135	6909586836574011	7926577711505864	9326287528300124
CCDC142	-1.51203e+16	8033463639181566	1563123129485932	6925746274377044	9055917535551354
CCT7	-9098292293583776	8017392223884908	4.99028e+16	2.54901e+16	1.35646e+16
ACTR2	-2.43994e+16	7185091934199912	2.04647e+16	6509955541064887	8856775841769327
RAB1A	-7886217924936253	8359514758079458	408345566837925	4330500770330006	2.01059e+16
COMMD1	2885442451943595	7668465118756699	2854650806863892	5931413780526426	8547247094661992
CCT4	-2.05814e+16	838264653268716	3.23452e+16	5695407532000393	8406075767152044
USP34	1.10839e+16	6881769036904919	2825846101128371	9275799803091204	3.27843e+16
PPP4R3B	-3676180539124827	7175181113796247	5018586158571732	4.78685e+16	7862478081235228
CFAP36	-3602131410659953	6928504651198291	3369226279309432	5616109483905914	8405690181503919
CCDC88A	-1.22669e+16	7.92033e+16	9089127653453940	7630471252802532	9283408804427532
EPCAM	1935587079197183	8641852727486402	1787194753714676	6724760204141524	8920433084394523
STPG4	2507292911660283	1.03911e+16	8576299332538166	3.54403e+16	6929370883973759
SOCS5	-4661745288699065	7628523537567424	8528129809435869	3557577752472063	6934641759329954
PRKCE	9653857050990704	6963599727137324	2.83972e+16	8661784389394652	963543775806624
LRPPRC	834340744889841	6655064547543705	7.63178e+10	9930297640907956	9998942974100888
COX7A2L	-1.2047e+16	9426808412540400	1.1919e+16	7299150535770896	9206135810882212
EML4	1135234338655204	7676673897913268	4759513272927329	2.91368e+16	1.48715e+16
SOS1	-8218088005967163	7358589934975625	1.37429e+16	2410761462697115	5799121724266563
SRSF7	2.02118e+16	8951774648690526	3.45038e+16	5569353020861327	8377043386750096
LTBP1	5035316326100201	7113832917119291	352685123284573	2.87239e+06	1.04555e+09
DPY30	-2994495945659402	802190891403322	5220636512348482	4.69963e+16	7818392470700721
PPP1CB	-2.1647e+16	8037292884011158	3.04824e+16	58087406062223	8471080050740855
HADHA	-3.4749e+16	7250471381876841	4.7033e+16	4928355691372975	7971655537182264
RAB10	3.46067e+16	7068254624760355	408979633307343	5224878579952688	8113719296513558
SF3B6	3.04583e+16	8111791488436175	4419649981230642	5061755561334299	8049557961590905
PUM2	4790733920500381	7.85229e+16	1.02849e+16	3105144184958697	6482105763913467
LAPTM4A	813228652119808	8723636044265694	5510393744579534	8144087707279987	9410945795079096
PDIA6	2895313619244848	8760469697720906	7256071517190295	3.94311e+16	7247408327651312
YWHAQ	-6887024763019634	9736182531547268	5661295584921078	8119316854852615	9406043533657484
KIDINS220	-9357301314672334	7106223506209666	3265154889716859	8566051028850615	9611721869610432
ID2	-7352743786883371	8753368764645097	2420272673852745	1.19774e+16	3.82437e+16
ENSSSCG00000008659	-2.42805e+16	8837226987406224	5293630202732285	4668747821269957	7788378583603411
ENSSSCG00000008686	1.96967e+16	8111913450070801	2.61854e+16	6088492139943562	866384338913001
LRPAP1	3716997676396592	7882030641461598	6079733688824085	9378498112201292	982174791481784
ENSSSCG00000008748	2523384115579976	8015135741694428	4.16692e+16	5185922328187634	8103017655475401
DHX15	-1.54437e+16	7005782161391589	741426785703473	7853978665719873	9326085272226364
PCDH7	8600649387535016	7.2305e+16	4.89003e+16	2693.09	1.28985e+06
KIT	-1.95647e+16	6558696104136741	5323487039646843	2.10399e+16	1.1715e+16
CPE	427323970897015	841409834344409	5801852349649362	259.661	15752.8
MSMO1	3352128522161952	7.07941e+16	3716377516890965	5421129038063053	8287370595065584
ENSSSCG00000008898	2.9194e+16	7128943328310804	1.52972e+16	9.18513e+10	1.23829e+16
CLOCK	-2.62335e+16	6812663986142899	1.5163e+16	968938422122881	991826731306886
AFP	6628880399977459	8629193324483227	1.79251e+16	1.80621e+16	4841386499235343
RCHY1	3.94797e+16	6736889605201598	2.1682e+16	6414736987909141	8812207105972734
SCARB2	-5308486430741959	6915760944351318	6506406988728002	4198837061127087	7458251934548727
SEPTIN11	1.6893e+16	7373072707693356	7449279323420722	6346185380302741	4873441937616451
CCNI	-3.77221e+16	9187895732601024	1.52654e+16	216632119490018	545838057088843
RPS3A	-1.81371e+16	1.26621e+16	4100925174019956	521922550916588	8113719296513558
ZNF827	1.52637e+16	6999948094630898	6156832655113066	1.30905e+16	819742482010743
ABCE1	6552328110091504	6890399210931771	8959947894441544	9245872725561104	9783423465419306
SMARCA5	-1794268763298755	7303125789082631	1.10663e+16	7393909923696506	9220857956722568
MAML3	-9195905439905200	8440934067219866	5698027450116048	1.6984e+16	9803232613274416
MGARP	5020138152338681	7868205287225821	1.02825e+16	3.10571e+16	6482105763913467
ENSSSCG00000009072	3529984569420628	7124247433920965	4152849172311446	5192992051246852	8103017655475401
ANXA5	3393401729952657	7157639669591856	3629296309845784	5468836782520454	8315190429563264
CASP6	-4.60506e+16	8226864889143654	1.55259e+16	2.12753e+16	5432620738474421
OSTC	4660936854169162	864961949105354	1.74932e+16	1.85962e+16	4933675853707557
ENSSSCG00000009146	-2.22169e+16	1.26725e+16	8134268829740297	3.67109e+16	7033036103989335
HADH	1.08335e+16	7614325196999078	3742351578410265	5304973506043453	2.29915e+16
CISD2	3.59933e+16	7.30548e+16	3.58668e+16	5492469186781255	833719259377972
PPP3CA	590991999179057	7881145359636297	1.75205e+16	1.8562e+16	4931796934634097
H2AFZ	1.24011e+16	1.01787e+16	1896538905631236	1.33111e+11	2352063364034381
ADH5	4.44462e+16	7667993111498726	8454637200781434	9267384795963620	9783434065344424
ENSSSCG00000009211	8963270118953802	70162914623766	2.3445e+16	1.25726e+16	3944504157502418
SEC31A	6715125982464507	7230243158861305	1.41058e+16	2.3496e+16	5694092032795466
HNRNPD	8683122298673613	8404245792423382	5699450709980146	1697022308386827	9803232613274416
XPO4	1470869043916312	773338806079257	9118055754695398	7626816520629593	9283408804427532
RPL21	-6236347378686402	1.15541e+16	5912830634174604	8078790300586189	9369670386487968
POLR1D	6163477022555841	8683079666865302	3.32537e+16	682185720915154	272275879838943
ENSSSCG00000009327	5594072811160167	1.05128e+16	4.66888e+16	3.07139e+16	1.54846e+16
ENSSSCG00000009341	-6314938197411261	6595860998644142	5.2751e+16	9421006185093400	9829972948730832
SUPT20H	2.12418e+16	7126079513591226	1421923561056584	7061111683484793	9055917535551354
ITM2B	3.11382e+16	82567567392181	5579407430920567	4550911403516605	7665270173921581
ESD	-3.52381e+16	8752319131758988	876357211844335	3492013546269515	6863352758326693
ZC3H13	5470846079767919	7120805779004536	105159944587651	3051390075191119	6453104643430253
TSC22D1	4.73275e+16	7648517662615333	892041926802796	3449245643801897	6838373716469992
DACH1	-1.67676e+16	9349137672166072	2878502603743094	5916014387365042	8538630439499427
RBM26	6732129619450128	7554085529219236	1.77935e+16	8938830727173621	968810294169614
NDFIP2	-4.8273e+16	6938605061072414	61599135342954	4.32541e+16	753266903766336
ARGLU1	7430306765842768	8307644445984023	3.71108e+16	5.40526e+16	2.33118e+16
LAMP1	3685807383228401	7692106577402798	5712111290594448	4497780469660202	7653869073784212
PSPC1	2.70263e+16	815573132786617	5358836567022442	4.64144e+16	7771311212359574
MPHOSPH8	6598789860860462	7037698129561403	1.35351e+16	2446659912674919	584249647789836
PPP2R2A	5920095437824114	7223934933885072	1.10811e+16	2924926581238856	6376325088678152
BNIP3L	-1.10282e+16	7508720024491758	4608855468011841	8300149058094088	9497343859089622
PBK	7907726091190083	7971990258331397	2.65261e+16	1.0338e+16	3495474475977934
FZD3	-1026404839791803	7426028694846766	4001354544591302	4546371278426724	2.08949e+16
HMGB2	239656866789239	8924152337830662	3985296374244476	273818	1.10744e+08
ADGRD1	-4713034676123861	8179631018434751	7930819141812071	0.000531389	0.0644752
RAN	-8445488090796148	1.04871e+16	1.02388e+16	7489820023884343	9244085272952274
RIMBP2	-4.86533e+16	6610513386620816	4394767407263078	9471445227823584	9852057452231140
AACS	-9007849868085072	6749353964469387	9666092072816444	3255272911485528	666433824398612
DENR	-3681698266726534	7494520494059866	2817733617173559	5955412415131499	8562003432997616
RSRC2	-5075731863462197	8043055822030139	1.81366e+16	1.7807e+16	4.80916e+16
ARPC3	1.46263e+16	8729529057214123	1.92316e+16	6609958668187059	8858707493446574
VPS29	7929944574209047	8116355710810598	3.94756e+16	4.69395e+16	2.13042e+16
PPP1CC	1.23e+16	7.933e+16	9113386696223812	7627405973826688	9283408804427532
ENSSSCG00000009851	-2620489432941391	9149207352519640	6563369286225116	4178561316209109	7437594854561952
MED13L	1.90096e+16	7484180055008972	8701737232054697	3179069286506535	2.7292e+16
ERP29	1255860686415672	8020663142798698	9528161725402806	7575670849274537	9278412480268948
DYNLL1	5134605548120816	9288973615450784	2.84934e+16	9141152537121992	3249394065930083
SRSF9	6233362097954503	8310412615244024	2.56874e+16	1.08994e+16	3.60672e+16
RNF10	-1.30303e+16	7188174344563742	5.13229e+16	8207770721820074	9448540615883956
EWSR1	-2.42922e+16	8201008595695967	4676561235155023	494067442084703	7971655537182264
THOC5	-1.13963e+16	6964080184596511	3934937629435661	4729289420375499	2.13195e+16
YWHAH	5138225396389949	8368448097479865	2.00097e+16	1.57198e+16	4.43567e+16
RAB36	1.23148e+16	1109730584798965	1.01163e+16	1469640068613732	1.40039e+16
ENSSSCG00000010058	-678799197398611	878214163255818	4168904255759398	8382136623594955	9516836341199512
MIF	4041415543670616	9991994826407756	2225297496089098	1.35767e+16	4089568322008658
SMARCB1	-5423200245540545	7710454567563421	1.31865e+16	2.50834e+16	5931249773951434
MAPK1	3.01419e+16	7093758993237219	3.30719e+16	5652358301538059	8406075767152044
ENSSSCG00000010104	-1.61977e+16	7879790712979238	1.42602e+16	7057077771160625	9055917535551354
ARID4B	-619878112808463	7936904022957114	2354156101170854	1.24949e+16	3.94121e+16
TOMM20	-3798861009875731	8529264771906249	1.27224e+16	2.59347e+16	6001416869560178
RET	-3618951140091841	7113145289464151	3.62059e+16	1.77528e+07	6.73126e+07
ENSSSCG00000010203	-3.08877e+16	8827075924220573	6874009227282203	4.0705e+16	7386148508175873
ENSSSCG00000010212	842544263783777	7308045064546953	227200526034178	1.31729e+16	4.02414e+16
CDK1	3825345514647696	6.74324e+16	1.43906e+16	1.48543e+16	1.87742e+16
JMJD1C	-5625892991718223	8058172506137929	2154703214556467	1.42134e+16	4184512953599616
HNRNPH3	4877520323637261	782694716818974	1176412048967161	2780876433181487	6210055347718167
PCBD1	-1.03986e+16	8138444746816955	8246395920386764	4083299467310818	3378002286593495
PSAP	-1.84753e+16	8468924991853637	2.84508e+16	9.61122e+07	2.82136e+09
CHCHD1	2.58959e+16	731636553547287	2.23993e+16	6360144759040436	8804270427586566
VDAC2	1.50436e+16	8489436428499738	1.77463e+16	6735624450769392	8920433084394523
ZMIZ1	1.03954e+16	7419535940938335	3.25124e+16	7136924417925947	2.76719e+16
PRXL2A	8051425029095979	7.29826e+16	1.78731e+16	1.81254e+16	4.8512e+16
GHITM	1.37427e+16	7745630724010236	2.82502e+16	928058566310571	3.27843e+16
GLUD1	2.10935e+16	7.48128e+16	1239291287780255	4309664314948138	4725053646509405
PRKG1	2556460335325387	7094142954522883	1.65062e+16	4.84913e+10	7285795312764342
A1CF	-7675643977552938	7722267912018163	2522792024621555	1.12212e+16	3665371407342474
RBP4	2.37085e+16	8430856968951769	3.30247e+16	5655139620582087	8406075767152044
TM9SF3	3745826746980119	7224646141017156	5041233337615172	4776939463957215	7862478081235228
PGAM1	4636563776725177	8106330151178165	1.14655e+16	2.84273e+16	629412878745135
MRPL43	-2.29032e+16	7358879874475745	1.25435e+16	7232128703344851	9166068412317292
DPCD	-2.4277e+16	715389207573043	2310566832851156	6307414183309913	8796546983619955
OGA	9316357180063684	6941550550047078	2.29708e+16	8795329252185449	965216973921262
NOLC1	4079067041250943	704075547532236	5599876609068384	4542652142171115	7665270173921581
SMC3	1.66946e+16	8377487044768527	2.15042e+16	6428438087650497	8812207105972734
FAM204A	2924738624725153	8129421887442655	5783319548059107	4.46967e+16	7645486192634089
EIF3A	-2099332858374171	7970487698172305	2.78147e+11	995792006356701	9998942974100888
PRDX3	471963142867491	8648623867454987	1.79391e+16	1.8045e+16	4841386499235343
TIAL1	5624681458723222	7364950943541206	1.06915e+16	3011364340552211	6442811741176322
BUB3	4287928079145504	7438310246381436	5569215982252214	4555032433633015	7665270173921581
FAM53B	6400556178213754	729328403091565	143661812228534	2.30687e+16	5628030077553009
CTBP2	-715393042368602	804015699056603	29976188514662	8338698927483854	3.04496e+16
BCCIP	-7841038760538396	7.31419e+16	1391048733182787	9061130366286668	9700223139444228
GLRX3	3443372549596606	7911866672198236	6882682303224847	4.06754e+16	7386148508175873
ZNF511	2.53499e+16	7021661684517854	2.11182e+16	6458423786593317	8827709229452704
NDUFAB1	-1.37429e+16	7933146576951533	1.12496e+16	7373199171361601	9220857956722568
UCHL5	1.47784e+16	7211513507844051	7993508775509592	7773853970973917	9305142718158328
RGS7	-153410547761546	6776306371934276	4449191571511877	3491777298862779	1.69468e+16
HNRNPU	2210695428274668	8962513063205646	4685811513996312	4.93641e+16	7971655537182264
KDM5B	-5534383241972199	7577878112116109	1233933998416958	2666433310265392	6095060022404163
ENSSSCG00000010954	-3.37599e+16	7230183744223327	3508546725473336	5536297189842023	836187625353733
DCTN3	1.73182e+16	7338541659393395	5.97165e+16	8069446392695704	9369670386487968
CHMP5	-806463128080309	8052325812317727	4527318374475609	3335784983697092	1.63202e+16
ENSSSCG00000011000	-5918984739812055	9488557665635346	4206969411938813	4.02582e+16	1.89328e+16
WAC	3404795561832869	6824476900264507	2.14839e+16	6430006064138346	8812207105972734
BAMBI	1.46404e+16	7531496577230467	6912558747726467	8559241840540448	6085085996009225
ZEB1	1.26557e+16	7805528890239894	655067241500271	1.04845e+16	6923493151196607
KIF5B	-2383227546018064	8083049600465102	3.75288e+16	5401358331627653	828177941327913
VIM	3562381379593681	963481274842632	8921206715389036	3.54679e-06	5.3793e-05
CACNB2	-2.05626e+16	7.90783e+16	2.10888e+16	6460719062434616	8827709229452704
ENSSSCG00000011068	3.21446e+16	7434149553527127	3292772822489092	5660849606656323	8406075767152044
KIAA1217	2.72769e+16	7070328891310592	188902431897277	1.38459e+11	2.42303e+16
COMMD3	7333686624704028	6980552505581558	151226967700957	9021273901519096	9700223139444228
ITGB1	1.49423e+16	843561173285275	1.48137e+16	1186674580028919	1.54268e+16
PARD3	-114932396887529	731532196326696	4563752489846522	3265544933545757	1.61065e+16
GDI2	2568894638533238	7685184045700931	2977597640030458	5852902678717243	848008326500817
PFKP	-2474964700349324	7932350128926656	3.03026e+16	3.69626e+08	1.1402e+10
ENSSSCG00000011171	5318481955236268	7.45554e+16	959383853227471	3.27342e+16	6670080960464299
TOP2B	4196779198122011	7721815060743967	8029494054731251	3702130062037047	7056945532647751
EIF1B	-2884051816050339	9145885863401536	8209123938211724	3649135383374267	7021048154088095
ENSSSCG00000011272	-4433585580843271	1.24798e+16	3.1515e+16	7585723518477962	2856713170086417
CTNNB1	256284006198798	8814337069449715	5757697599803309	4479752334042815	7648357643487733
HIGD1A	-4.52392e+16	7291986177084848	4522201215167687	5012825353120755	8032978347580589
DHX30	-9159283235714708	7381247888723894	2897125257380351	8873767843529744	3176337260794491
TMA7	2528288462132805	1.01273e+16	9149084836026388	9237978789696112	9783423465419306
UQCRC1	251362972720803	7925781472851929	3678212753151098	5441942614344519	8287370595065584
NDUFAF3	-1.14429e+16	7.10222e+16	4819111770214968	8262412990489728	9494113040165332
QRICH1	-4.03123e+16	8110507694335661	8579182466079072	3.54322e+16	6929370883973759
RBM5	1.29862e+16	7253154681064548	6587277531904798	7974436294465285	9326795317256922
GNAI2	-1.31405e+16	7.98952e+16	1.07723e+16	7427516387497207	9228070298616572
HYAL2	-3.64466e+16	7203499572057319	4295207390440834	5122242080176587	8079734895378387
SPCS1	3.59874e+16	8770509438332253	1099736002445896	294324048026521	6378426997813947
GLT8D1	-3.1266e+16	7.16198e+16	3.70551e+16	5427043236181147	8287370595065584
PTPRG	-8824558349290295	7499308941762419	2790082734426158	9484933032825152	3313354725478268
ENSSSCG00000011489	-3847058635252872	8128722772357468	1063399903162967	3024410248439176	6442811741176322
THOC7	1.07339e+16	7353307422419019	2.63669e+16	1.04421e+16	3509909370135125
SUCLG2	-3.87352e+16	7699196535052618	6020425998219172	437799741287273	7545412207792015
PDZRN3	2324352645017889	7128693138773496	1.96134e+16	6578595043941469	8856775841769327
SETD5	6937353316955529	7.25972e+16	1.52178e+16	9018216967192596	9700223139444228
BRK1	9958376669824176	8465311936517882	8386396551687428	7721278079483784	9293438044979946
SEC13	4.65814e+16	7.29055e+16	7537610939896094	3852880524737987	7192043646177576
LSM3	1.79979e+16	749158908986097	1.05532e+16	7452898459780953	9233722389162312
RPN1	6480598087345508	7750836077536244	113431440385256	2.86857e+16	6335917767154001
RAB7A	-3362210857815976	7443765167301958	2.17319e+16	6410899870847503	8812207105972734
TF	7289901426551714	735741644178094	1.7769e+16	1825308408370977	4874215487312769
ENSSSCG00000011676	-1.13563e+16	7176704529025642	4548137801393248	8311213361377052	9497343859089622
U2SURP	-2.57414e+16	7123358663242625	2542138596722481	6141234745546912	8693865727011556
COMMD2	2.27434e+16	7223458753558515	1552863822870738	693533839240298	9055917535551354
EIF2A	-3.94048e+16	7148911384976387	6126603618331103	4.33788e+16	7533339340228092
MBNL1	2.59128e+16	7143250945051146	1482658574782319	1.17862e+16	1.54268e+16
SERPINI1	-2510706276807696	7300621757622271	1821483959984442	1.97335e+11	3.29496e+16
SKIL	1.23031e+16	6795985282051353	2926547522854753	8713364489745934	3134056002240632
FNDC3B	2.39966e+16	7212837363197292	1.56783e+16	7.50787e+10	1043078563590483
TBL1XR1	2.04445e+16	6919384812695662	9481928741464416	2075056983684434	1.90738e+16
NDUFB5	3102955941863522	8595225168064111	7972371622766756	3.71921e+16	7056945532647751
PEX5L	-1.03135e+16	6985676528439966	3.17527e+16	7476105546610959	283533490474181
TTC14	4162620490006596	7313601283619634	5096760802183693	4.75279e+16	7858658738173757
FXR1	-9315224357278	7599601584876938	3.29765e+16	6937889388439993	2733107940900603
DNAJC19	-1.09219e+16	7795041973069621	4013818157113391	8412106489048857	9533022297676788
IGF2BP2	124637372650437	838858066240388	1148205595670172	7027135140564965	7185048289791144
AHSG	-6018963988808406	9472728593062026	4487066242835347	983099917505792	9972778482085786
FETUB	1.17814e+16	7751083257181513	6489034522087567	7989271373408539	9326795317256922
LPP	9731085760750564	7532759838538538	3359670310654872	6681144295987948	2702151693044014
PAK2	2.94729e+16	7056909523053005	2929693933263008	5883239268124626	850476208736046
PCYT1A	8327920124804437	7276126481141708	2.44134e+16	1.18175e+16	378185161418939
ZNF148	728687986560253	7.43902e+16	1.91443e+16	1664716763227221	4.61977e+16
COX17	2.33826e+16	8107714603744657	3.27807e+16	5669531346823355	8406075767152044
CD47	1.93934e+16	7776224560248541	147809515611224	1.20749e+16	1.55861e+16
BBX	1.50457e+16	7595212668454313	6215545697312113	1.26633e+16	805848354777294
ALCAM	6089999085776526	7590817155898911	1480899065207623	2.23634e+16	5540217513322089
RPL24	-2.975e+16	1.20502e+16	1.31809e+16	2.50935e+16	5931249773951434
TFG	3.32578e+16	716144079981704	3.57633e+16	5498236405223625	8338991881255832
NIT2	5250025674059683	7356076026259198	958202230212885	3276402405854441	6670080960464299
CLDND1	3.84821e+16	7038153356731795	4.88583e+16	4.8456e+16	7895249822385333
CADM2	-2.12476e+16	6807652508006528	6794789356165673	914243097354084	6350848996887148
ROBO1	2.19023e+16	7198278991698903	1.20944e+16	5057478232732963	5446515019866267
ROBO2	7521605201165623	7114876925746763	3.11744e+16	2.35862e+08	7.53102e+08
HSPA13	4.48925e+16	7323242150620311	6945316136887092	9335823378311672	9809869159496380
APP	1.04845e+16	8159529894749994	6945199468916471	8404446511879689	6022083721110643
ATP5PO	-1.9448e+16	9341478126383496	443315580291454	5055264919252649	8049557961590905
ENSSSCG00000012046	-5550134772298637	7515508115209047	1.14833e+16	2838990435031479	629412878745135
ENSSSCG00000012061	-1.34506e+16	7290815932787373	6697698788845088	7957902318570703	9326287528300124
TTC3	-5422248322880094	7878091875405162	1.42553e+16	2.32495e+16	5649407913305318
PRPS2	7901780135327063	7.03492e+16	2.11127e+16	8844722976099554	965216973921262
TMSB4X	1.3773e+16	1177114548763612	2977345984012223	5853061218616727	848008326500817
RBBP7	1.70494e+16	7092915439444303	9830881900537824	7538686341815748	9270546717638284
SMS	-7661993686430961	9058363830788672	3924710421378749	4.75814e+16	2.13296e+16
ENSSSCG00000012178	3.4917e+16	7567713315680128	4.91735e+16	4831544230940042	7895249822385333
ENSSSCG00000012238	3.71262e+16	7117525912195745	2.38686e+16	1.03139e+10	2.31744e+11
ATP6AP2	5629743735425065	716318677368467	1.00212e+16	3167979002564372	6555697189494661
USP9X	5125227618950665	7430941375605545	9545454068882004	3285649955135499	6681433428320233
DDX3X	5052112997901858	7760309678415721	1182554514904197	2.76837e+16	6203514789545858
FUNDC1	1.46021e+16	7108935093853102	730089412027203	7870051097962527	9326287528300124
PLP2	-8098992698113213	7.18538e+16	2.04212e+16	1.52996e+16	4379932461124006
MAGED1	9055638190417360	8034863363367695	5217784754852654	2.2357e+16	1.22912e+16
SMC1A	-1.31662e+16	7257553517522095	6834151547612066	7937670144672452	9326287528300124
HUWE1	348305974924906	7.17303e+16	4.27277e+16	5133282862550674	808880935917076
ENSSSCG00000012382	-5663952188316652	7091612165127678	1230582660000029	2672937545008669	6096173348265386
OGT	-2.6063e+16	7435150557121017	1.91392e+16	6617603236212832	8862426703390254
RPS4X	-4.31872e+16	1207473289979774	2.09603e+16	1.47682e+16	4.29362e+16
ENSSSCG00000012427	-1.19903e+16	1289595513173756	2.26747e+16	6339467885236586	8804270427586566
ATRX	-4.79653e+16	8219835867689508	1909672954451764	1.67e+16	4626168300045617
MAGT1	-1.02231e+16	7182822072333804	3.5306e+16	8509558143594375	9577857650798864
ENSSSCG00000012452	1.35662e+16	7481855912744906	5924422814678248	1.49324e+16	9028910470611112
TSPAN6	5101132050412032	8569170084841119	2.21187e+16	1.36953e+16	4.1131e+16
ENSSSCG00000012517	3427845236897826	1.13706e+16	5.97193e+16	109.396	737.41
ENSSSCG00000012520	2.37757e+16	7154300617176565	1.8033e+16	9661277500219942	9906925260182964
ENSSSCG00000012523	-2.51262e+16	807687410164404	3789983829340833	5381397728521895	8262931992697223
BEX1	-4.7863e+16	9487580467865688	2.56296e+16	1.09393e+16	3606813875657968
ENSSSCG00000012527	8811020963241277	7.25611e+16	2047694445313173	1.52437e+16	4379932461124006
BEX3	6327364696505244	9698376810352216	440330790241554	3.58693e+16	1.72248e+16
MORF4L2	2.66391e+16	8813696587778011	5916213594504122	4417928330836193	7592662476035761
DCX	-5816702963631012	8216406168234478	2.58868e+16	1.0763e+16	35880456416155
SLC25A5	1.33473e+16	9209137275528468	1.703e+16	9670827085647326	9906925260182964
PGRMC1	1.92118e+16	8485406960533016	1.26731e+16	3.70964e+16	4116794195139789
GRIA3	8838405950071634	7.78195e+16	3.17444e+16	7479862130725233	283533490474181
THOC2	-7782224263546316	7674619042169305	2.75481e+16	9867576305908240	9975242732938388
SMARCA1	2.08625e+16	6951618693690258	8640424392632085	3.28785e+16	280933518747076
ENSSSCG00000012703	6870908327526513	8431677791695147	3578195408921481	849966487916503	957316252295201
ENSSSCG00000012757	566149009627721	7667921961453424	1304531718245206	2533871093794108	5942841998331542
BCAP31	9410635779493268	7628965663959322	322716547832911	7242594685422028	2786791189739554
SSR4	-2.73765e+16	1.04671e+16	1.18733e+16	9132304198641020	9735517725729296
VBP1	2.13606e+16	7390749841439212	1725888906387748	6778211536546487	89523548595897
CHID1	518649249669391	7076666735071734	9541135922377264	9221873991593686	9783423465419306
RPLP2	4.01493e+16	1.15578e+16	270944993888671	8692556286496037	963543775806624
TALDO1	-2.47977e+16	7985807528000199	4.16712e+10	9948494312155368	9998942974100888
MRPL11	-2932470714203219	7556450204822018	1.94123e+16	6595069481636037	8857688159491117
SF3B2	-757266894760404	745355873946789	2.14615e+16	1.42928e+16	4.19498e+16
ENSSSCG00000012961	6039177001181538	9499192834645536	4333854374176804	373615508754967	1.77112e+16
DRAP1	9327286301592782	7.3519e+16	2.8954e+16	8883272888705472	3176337260794491
FIBP	-2871678403423166	7191532584671284	3014838025017965	582953701778377	848008326500817
CFL1	-3164512175566158	1.07013e+16	1.10878e+16	2.92348e+16	6376325088678152
RNASEH2C	5734188580195996	7903342262553345	1.61354e+16	2.03995e+16	5243944274781231
TRMT112	1.38636e+16	9293737276061676	1.80065e+16	6713177118797001	8920433084394523
PRDX5	-4.65084e+16	8262045967701253	1.71658e+16	1.90134e+16	4986234393286495
OTUB1	-6888614443165275	7331723034136551	1.67452e+16	1956539852673739	5079746835757781
COX8A	3.06159e+16	1008592888784586	1.32766e+16	2.49222e+16	5921474169777964
ENSSSCG00000013052	3.2193e+16	7626643226687765	3.95942e+16	5291925880862285	8182927020534714
EEF1G	-2.13003e+16	1.15944e+16	738854075430682	39002820604081	7206612538012936
PRPF19	1259036426048607	844559609152377	1.12463e+16	7373573452670259	9220857956722568
SERPING1	-4.3439e+16	7.65104e+16	8395047890462541	3595384398033505	6983564145593362
ENSSSCG00000013232	-4190500801816026	8536649686077077	1.4847e+16	2230400681002637	5540217513322089
CELF1	2341623254398686	791596590891852	2856960923877043	5929918692793597	8547247094661992
MDK	-1.24828e+16	1.18887e+16	2024116574517793	6.8268e+09	1.30787e+16
CAPRIN1	-1921867390120973	819075114151424	2759553166349349	9581052369974740	99038685165535
QSER1	5107384366779919	7132659599742646	9271730796445724	3.35599e+16	6729050426610714
EIF3M	-2.33221e+16	8067779399460553	3252460818002736	5684718676275244	8406075767152044
ENSSSCG00000013318	1.57119e+16	7392249164480827	6576850588941991	1.03314e+16	6887568716071384
PAX6	625444867868008	82689354668097	1.71252e+16	8958833654326706	968810294169614
ELP4	3.55427e+16	7494355949915755	4561517310288943	4.99428e+16	8029672470653658
IMMP1L	3153383376385198	7586430021340899	3984852304595166	9496664201626124	9862088342789
HTATIP2	-9039028259964140	7.36279e+16	2.82305e+16	9291995909447056	3.27843e+16
LDHA	2.38523e+16	7202369570703604	1434951172580505	1.51819e+16	1.90559e+16
ABCC8	1.73571e+16	7135057551907773	9058482848064272	2614788502685392	2344293140338627
RPS13	2.47742e+16	1.04925e+16	6632966937301896	4153984933958438	7423072253493692
ENSSSCG00000013391	-8431056562393369	8354655873328802	5688662765765779	1.70749e+16	9803232613274416
COPB1	2.29305e+16	6958828630442352	1.41682e+16	7066142082029685	9055917535551354
TEAD1	-3.5815e+16	7719550145859372	5141016981890254	4733686328489133	7858658738173757
USP47	1.0034e+16	7217997609274911	323939836383651	857165688890143	9612085975231424
EIF4G2	2912994526563842	7332867812741728	2.58916e+16	6108659882712038	8678970325164643
SBF2	4875601400730889	6780997222507688	3206052202054619	5712441566184064	8406075767152044
PTBP1	7875484673774636	7556708016647646	2.32527e+16	1.27288e+16	3956164972747604
DAZAP1	7278390803784497	9655238434876368	6814892429164443	9791733106862644	9955798825638676
ENSSSCG00000013453	3.89354e+16	7115272645845703	5342499648816816	4648255459578741	7775574390104144
OAZ1	-2.9049e+16	1033857232148397	8038433151847677	3.69947e+16	7056945532647751
LSM7	3611157812975317	7.68194e+16	5003221387525968	4793586114125002	7862478081235228
SAFB	6556890635687951	7208084543815426	1.4786e+16	2.23994e+16	5540217513322089
MICOS13	1291661132270434	7353166234732357	3.38886e+16	6563836835141858	2672524170013016
RANBP3	-3.32244e+16	6935568414431049	3.24315e+16	5690261629200916	8406075767152044
KHSRP	9850971465501520	7124511224536704	3229738994885293	7231221282868155	2786791189739554
TRAPPC5	-6070764463450585	8196083747676681	2.91506e+16	8644318127196041	963543775806624
ELAVL1	-8800620374686527	8302418067125283	5943545690579442	1.47713e+16	899121009645819
RPS28	-4.95541e+16	1.18905e+16	3278352412523807	7019936781696058	2.75946e+16
RAB11B	2.20139e+16	7558627736593433	1.44298e+16	704045127835928	9055917535551354
HNRNPM	-8819101309780962	9216116648388444	7937632721880416	4841713252719647	3.86488e+16
PRKCSH	-2.76495e+16	7760673110616029	2732065245921067	9583142252574708	99038685165535
SMARCA4	-4805481308020342	7.97157e+16	1.43174e+16	2.31481e+16	5639137836391828
ILF3	1.62413e+16	7921778438184503	1.43511e+16	7048151597073611	9055917535551354
EIF3G	-5652739044608147	8767089562710412	2334549173352002	1.26532e+16	3956164972747604
WDR83OS	-1.93699e+16	840153032827933	3.13628e+16	5754625929440146	8436245054047753
PRDX2	-1.98116e+16	9896674834766688	4691305887408692	49338741047804	7971655537182264
CALR	1.85578e+16	8434037954374837	2.47002e+16	6191940812821989	872914971288615
STX10	-1506351171792498	6991566319879129	1.18704e+10	9991306954744240	9998942974100888
ENSSSCG00000013754	-2.45659e+16	7614699669364135	1634951717789952	5.26696e+10	7691715506790956
NDUFB7	1.00883e+16	8450654225141854	86640251823093	768492637835385	9293438044979946
TPM4	2623414302858852	936200940036984	6045081016579552	7.54403	528.082
FAM32A	-1.23654e+16	7547021055174045	5.29231e+16	2141977000354143	1.18492e+16
SMIM7	4.00962e+16	771977373896918	5549830015565058	4.56289e+16	7668010559206017
RPL18A	-3.76592e+16	1.24298e+16	2349727181316853	1.25305e+16	3944504157502418
CCDC124	-6725982840108166	6854143654330298	1.11517e+16	2909615515420626	6376325088678152
ENSSSCG00000013906	-1.27695e+16	1.18476e+16	2.23582e+16	636324101446568	8804270427586566
GUK1	-1.61773e+16	7945952017475133	9655048524037912	7560091278482396	927071131244526
ARF1	4503777763107897	8928144350230507	1887777579019423	8907174619007523	9684024974070308
TBC1D9B	3.83228e+16	6879612774161414	3.20426e+16	57135187493649	8406075767152044
SQSTM1	-9244250492001844	7254279623086942	2.30821e+16	1.28692e+16	3.97656e+16
CANX	9132313335173548	818288109806053	5781845658225354	1619252956716622	9537347512052596
HNRNPH1	216844238847325	949740627223458	5844190191204977	4445854006737383	7633447445530224
ENSSSCG00000014031	5427012377356013	8165703904940576	1.73976e+16	8950634488394219	968810294169614
LMAN2	1444963467721244	7146770340538298	5449986129978068	815410396698486	9416541383193176
CLTB	7158535021174057	7719671845983018	1.90094e+16	1.67973e+16	4.64606e+16
ENSSSCG00000014071	-6276738079331904	1.09181e+16	4757493733040793	2917099462964227	1.48715e+16
NSA2	1.90342e+16	8166679935339715	2744537544208898	6003596826913173	8583304183018049
TBCA	407575088005691	9385360147804244	1452942098836596	2.28056e+16	5599638514680102
RPS23	4238293874928031	1.17989e+16	2483417402238075	8747809692694232	9641543041294024
VCAN	1822054251506546	7270150614957433	6155183937591389	1.31027e+16	819742482010743
RFESD	1396107531005302	7108907299203771	6984612277145336	7915609569046893	9326287528300124
RASA1	2.33946e+16	7136294108869036	1.96756e+16	6573522222864445	8856775841769327
CETN3	4886116630663491	7529079167502335	8084494246749339	3.68579e+16	7046364691801534
NR2F1	7531139919655282	6833801283344942	2.37444e+16	1.10016e+09	2.44181e+11
ELL2	-1.42481e+16	8945793958391896	1.81336e+16	2.05936e+10	3.38444e+16
CHD1	-1117157002191079	6837304646462078	2.58334e+16	8723077371414435	9641543041294024
PAM	2717481403894833	7295312485570452	1.81292e+16	2.06414e+10	3.38444e+16
MAN2A1	3273049473790282	6787193113304093	1.42414e+16	1.60798e+16	1.97738e+16
APC	9801448943805520	7.10455e+16	3.09271e+16	7864381542626454	2921056001546969
LMNB1	3.98872e+16	7188238399857329	5668307305043425	4.51521e+16	7658605037276512
HINT1	6517159594613539	9379275385019236	4.70501e+16	3.00747e+16	1.52358e+16
ENSSSCG00000014280	-188521923802598	6.97244e+16	1.02915e+16	7483591489941361	9244085272952274
UQCRQ	4961843057073317	8890000508012132	1.24052e+16	2.65371e+16	6082814584942275
PPP2CA	-3267040875950197	8778920798989722	9466536457816812	3305725481673092	6707269093249751
MACROH2A1	-4789504311842881	8386596595143756	1.82784e+16	1.76383e+16	479130750070165
CXCL14	-1.36799e+16	7653529345432095	3.21015e+16	7318281872546788	2804057475375822
ENSSSCG00000014343	-1846219729981377	8705443666997708	3.13231e+16	5757041954465555	8436245054047753
ANKHD1	3.2878e+16	7166840667097627	3.68416e+16	5438689492246983	8287370595065584
NDUFA2	8090315763769824	7931684041089718	3742114209106985	5305727128216082	2.29915e+16
CSNK1A1	-1312937998378674	8039840555517968	1.09901e+16	7402574064417605	9220857956722568
ENSSSCG00000014540	8181960599677257	1.25357e+16	8947611997090732	7648442199085879	9283408804427532
PSMD13	-9003243311349848	7523074867396445	2.14753e+16	8834916262383917	965216973921262
RPL27A	-3.42098e+16	1.23867e+16	1.54474e+16	2139130012745362	5450042623488277
HBE1	-2.08297e+16	1.1953e+16	5285004565900309	9420464107619508	9829972948730832
ANAPC15	-6391394136366066	7620769618448823	1.34096e+16	2.46865e+16	5873127590390976
STARD10	-1.76652e+16	7.39105e+16	1.03725e+16	1.27905e+16	1.23823e+16
SPCS2	-1.80572e+16	8676395583290912	2.21037e+16	6382511088017744	8806800743132899
RPS3	-2.30862e+16	1.21496e+16	8315684343804506	3618193916275816	6990461358329013
RSF1	-2.90755e+16	7540610521902452	328101091059791	5667793795893226	8406075767152044
CREBZF	-2239686996085839	7315238474119699	1.46086e+16	7023041809612237	9055917535551354
PICALM	638949556765849	714299363189124	1351961889641062	2.44935e+16	584249647789836
PRSS23	5272673485277253	7306268292807553	8776152822364605	3488556672481241	6863352758326693
MTMR2	-1.1916e+16	6877093931221353	3.60974e+16	8493144676555034	957316252295201
CCDC82	1611447763815545	7403185900328418	709070267430378	774848607617224	5.62925e+16
RDX	5985024494028751	7326519814495529	1206067301982682	2.72112e+16	6153770334868411
SDHD	-6780749931519947	7908962999004835	2.30024e+16	8794507937626497	965216973921262
NCAM1	866920276819721	7731289520120605	331305617496047	6873155838588306	2.72498e+16
REXO2	7663774130520611	7354894356073633	1.66486e+16	1.96949e+16	5106080263420779
ENSSSCG00000015083	-1077761903395089	8074091832514839	7336701439509321	6756069981917921	5098354207108835
DDX6	-6519182233735553	7720883128602042	1.94933e+16	1.62659e+16	4533531745581818
HSPA8	-7815556069254405	9921315672015346	7864492048736938	5041498706917334	4006780631698492
ARHGAP32	-1056126378456305	7055248328146086	4140943046152616	4185784415727697	1.95337e+16
SRI	9000090423595222	8267843136175289	4963093171731902	2.58938e+16	1.36997e+16
AKAP9	8449100254812048	8293894648318542	5598944990556043	8129509054089684	9406043533657484
COL1A2	6702963879631962	9404297500677222	1579575849778726	3.16161e-21	1.43853e-17
SLC25A13	2714636841539336	8867902275605605	620786886937593	4307550241225559	7522109175624809
TSPAN13	-3568921046035994	7711203416598062	509036758043711	4755561336994173	7858658738173757
TOMM7	-3331155031102901	8211586821206081	8822725549161656	3475799995982317	6853690132922879
CACNA2D1	-1.32001e+16	1.00991e+16	2001871600125928	7.66879e+09	1438886114756432
PDIA4	-9799520046055002	8131400979473257	6843373866043531	7936310544367308	9326287528300124
PRRC2C	3340985948107522	8070614775438159	7441086604416134	3.88348e+16	7206612538012936
CACYBP	1.00236e+16	7846408849734261	5.03574e+16	822442549079981	9461728440743144
QSOX1	-1.02289e+16	8044982000502012	6757487519793749	9335511262961552	6425565675772014
GLUL	2295799167895867	7638375679625587	1.92967e+16	9649617691176120	9906925260182964
ARPC5	1017696335715271	7631841526844304	2663193464543129	1026943663255717	348701019986083
TPR	625130713869389	7098783630117206	1.39599e+16	905947187148897	9700223139444228
CENPF	3.65808e+16	6.86486e+16	1.87041e+16	1.52654e+11	2646009363295708
PROX1	-2.20488e+16	7950883541994663	256905466844273	4.00785e+09	9.99219e+09
MBD5	-3.37044e+16	7.6321e+16	4.41469e+16	5064144981330542	8049557961590905
UBXN4	-6570773276942394	7408050182656287	1.44687e+16	2.29031e+16	5610180202893003
MGAT5	-1.03563e+16	6981582361301641	3313784294994958	6870111627741218	2.72498e+16
ACTR3	3577170640055052	7340844535341419	4138579351206214	5200178363513884	8103017655475401
NIFK	4.14036e+16	7.19557e+16	5631676738381877	4.52987e+16	7662315023078186
SPCS3	9418752691083412	8285926649675108	575846973631074	1640935723578267	9602903591358348
NSD3	5600705524263518	7513523534054084	1.03436e+16	3.09137e+16	6482105763913467
ZNF703	-1.55496e+16	6816695928669699	5003378973258669	2529788379980761	1.35094e+16
GTF2E2	4517830450694929	7073537588757966	7224803573203484	3953315102830248	7253057950757109
DUSP4	-3.51203e+16	7631416410431519	332251340003493	8.20827e+06	2.81869e+09
TNKS	-1.06294e+16	7740609009047581	4574222675928274	32456468058362	1.60518e+16
WDR33	3.35841e+16	7731428907053557	4.94533e+10	9943890802084802	9998942974100888
PRPF40A	-1.11085e+16	8201468988524784	9941762617614576	1.61571e+16	1531556222963505
ARL6IP6	1.00415e+16	7497366611314066	3210292765488505	7317638876275924	2804057475375822
ACVR1C	8128840899591943	7121655086126759	4.05378e+16	1.92846e+06	7.97681e+06
BAZ2B	-8901671633761464	7425251335593355	2545521791360227	1.10607e+16	3.63367e+16
RBMS1	21841481868333	7580768784066864	1.2803e+16	3.46058e+16	3911961506128067
GCG	798418456531397	1.49395e+16	2664320241362329	6.80069e-45	1.23773e-40
SSB	-2.1685e+16	8928190525421975	4452640638175773	5045925977463026	8049557961590905
DYNC1I2	2344234573248667	7613187436086835	2.15835e+16	6422317394612866	8812207105972734
OLA1	-944988079015522	6944833014585072	2.37862e+16	8774302165687875	965216973921262
ATP5MC3	1909802490690793	891829094357206	3327709405283241	5640319953913605	8406075767152044
HNRNPA3	4355977512490953	8815544038159468	1720864636608277	8956315481597934	968810294169614
ENSSSCG00000016002	-3.24986e+16	7261282905083172	3473441432872364	555620410113671	8369677952589417
NEUROD1	-1.37295e+16	8184025050911941	1.13668e+16	747679983730252	7573769055687695
DNAJC10	1729163265564168	6872824209097865	5937019277817975	1.48261e+16	8994483567273466
ZC3H15	-2.07393e+16	7.77787e+16	1.88681e+16	6640169465638671	8868520499018978
ITGAV	1.6993e+16	6852564360325732	4333528712598083	3736869910405803	1.77112e+16
COL3A1	5496231691867341	9690291939239080	1552799340339816	1.21624e-19	4.42712e-18
COL5A2	2257243080901186	7.39644e+16	1218541141718919	4816471501984653	5217844127150041
GLS	1.13725e+16	7828082339344355	582936580384647	1.57608e+16	9374073163511736
STAT1	861080377996771	7304070024788355	1.76036e+16	1.8458e+16	4911340466965509
PGAP1	-1.5311e+16	7502373993622466	8401711984045956	7719255870517672	9293438044979946
SF3B1	1.09697e+16	8261571637875937	8213698186549134	7744220587769292	9293438044979946
HSPD1	4146439850721016	8175394981565452	1.19031e+16	2752671297234969	6201783612514343
HSPE1	1.14793e+16	9615044582798776	1395759276317543	7087029620257725	9064226218460336
MOBKL3	-3.50359e+16	7084062104332974	4.45019e+16	5047099411739894	8049557961590905
SPATS2L	4712083617203204	6586433534464072	1626936514740011	5.49451e+09	793651972823619
BZW1	-4.85425e+16	8486487919943777	2073797330181952	1498480155411466	4349655315548434
CLK1	3.12483e+16	7953889010434703	6146746551028738	433033129341633	753266903766336
NDUFB3	648696913859491	8515043301539707	3.33456e+16	6783853640378708	2713541456151483
CFLAR	-1.40849e+16	7581885321908872	7853122911274523	5.0733e+16	4014524167019039
EEF1B2	-5371320786657579	1.08098e+16	3.67423e+16	5.52597e+16	2.36086e+16
MAP2	-687504590552132	808503460672049	2.69701e+16	1.00537e+16	3.43888e+16
FN1	1.87433e+16	8351874242827442	1.85172e+16	1.68374e+11	286393543286689
ARPC2	3885144556437728	9578484505249716	1.47243e+16	9034189469656000	9700223139444228
AAMP	-1.08085e+16	729148137321623	3554593170442806	5938086268907258	2.47868e+16
VIL1	-8304297913725389	6921599447318424	1962661383114019	1.61229e+16	4.50748e+16
CUL3	5255241826323549	6964511006497275	8310829163241503	3.6196e+16	6990461358329013
ITM2C	1.91123e+16	7217257466635991	8915331693406857	2.82786e+16	2.51059e+16
HES6	-3.36995e+16	8556569325641656	6940356535794048	0.0802435	6.95444
NDUFA10	-7940740090689913	6938251320305223	1.8263e+16	8925005149135149	9685708084615516
RHEB	9701554135861768	7641671335410602	2964986178611709	8508518502398706	3081368957212392
SMARCD3	-1.05074e+16	6.9972e+16	3.7426e+16	530418162516944	2.29915e+16
TCAF1	4.47998e+16	7.26192e+16	5590855861695028	4546289085597634	7665270173921581
FMC1-LUC7L2	2.12758e+16	7.5078e+16	1.7126e+16	6789942763849547	8959556410840984
TRIM24	-4127436844172747	6.78148e+16	3469855510448375	5558245167914612	8369677952589417
PTN	2262179080165038	9177651170666264	5080106604024248	9431789979194948	9829972948730832
EXOC4	7801809745007473	7927207713376781	3380732886170804	6596271726501259	2679735388891136
COPG2	-1.93979e+16	7395691651732417	1.04588e+16	1.22067e+16	1.19442e+16
MEST	-1.65129e+16	8727526552154492	2.18177e+16	2.99822e+09	6.20086e+10
KCP	3535584805240636	7152820183586274	2273816044154516	1.85644e+09	3.97497e+11
ATP6V1F	-4.01956e+16	8162066334020109	1193147900589934	2746955058684451	6201783612514343
SND1	-8486040488901049	7751412891881223	3295069542093976	8559568743328924	9610373296026304
ARF5	-9766681587213588	9155283127310832	7842581220801669	5102968993214229	4020521024956666
FAM3C	1.34489e+16	7321658785738849	4867157515897322	2737255188577055	1.42745e+16
IMMP2L	1.89141e+16	7166580919843167	1.13634e+16	7490540824306511	7573769055687695
SEPTIN7	8145877677727981	8665510983675862	3954106620349797	4675713104242077	2.13042e+16
SCRN1	-1.55332e+16	7743998905295319	1.04008e+16	1.2596e+16	1.22592e+16
ENSSSCG00000016687	-3.25028e+16	7705288804392403	3339740584090381	7.51241e+06	2.62934e+09
TAX1BP1	9537378060420754	8050542137247907	6072102744862584	8053599353629488	9369670386487968
CBX3	-606844828215459	8749533391033722	3066717346571167	7991068344982542	2950049571575705
CYCS	-1.13024e+16	9012616531656156	1.28376e+16	3.39718e+16	3.86429e+16
MRPS24	4.27373e+16	7290227005449802	6800300897324793	9342777947736508	9809869159496380
ENSSSCG00000016737	2.09859e+16	1.15166e+16	6476536047450112	4.20953e+16	7467194419812792
H2AZ2	-2413625246327964	9455269453464088	6726913253830347	9346325891520176	9809869159496380
TMED4	-3.06005e+16	7832816920883529	2.97134e+16	5856848716546852	848008326500817
ENSSSCG00000016768	3797858719606186	7.27537e+16	5312087399888696	4.66099e+16	7782572512461817
CTNND2	-1.52919e+16	7732918349085192	9675783555328936	1.86713e+16	1.74265e+16
TRIO	1538439097200174	7416215881520873	7385372763456864	6.57564e+16	4986530042944845
BRIX1	-1202946315174735	6877121161955976	260449032796357	1.06561e+16	357167160298059
NIPBL	1.01094e+16	7275938275291678	3373038420365551	6627142638276375	2686280534891537
PAIP1	-8330894648798243	7194737277568559	2.56294e+16	8728086764978649	9641543041294024
ISL1	1.36138e+16	813283049274444	8848925911414195	2932614177609655	2.57843e+16
MOCS2	-5977293200911443	7412256902239711	1.30796e+16	2527638573763071	5942841998331542
NDUFS4	1.04838e+16	871622471019367	1.0158e+16	7499413326922577	9247244075202636
GPBP1	-4.87075e+16	7658787564438655	1054492596822135	3044746655995934	6451034824112456
RAB3D	-1.10534e+16	7053114219710242	4339378071905894	372405243817893	1.77112e+16
PDE4D	2.45136e+16	7820890573089105	2.05045e+16	5.94912e+09	1164237359251988
MAST4	-1736704087441322	9074316791908728	2.42444e+16	8.48555e+08	1.97996e+10
PIK3R1	1.07269e+16	7447994588708011	3.92759e+16	47499961159418	2.13296e+16
MAP1B	2870870334623009	873363882497477	7402581727498292	3.89578e+16	7206612538012936
CPEB4	-17006642383667	6.98946e+16	9368669366487924	7595415870419926	9283408804427532
RPL26L1	-1.18091e+16	8676960100847124	1.27478e+16	7210610645799875	9151542102758560
ENSSSCG00000016990	-7548528481756335	8025565587120541	3.88718e+16	4865613749390944	2.15986e+16
ENSSSCG00000016998	633266413866472	1.03788e+16	6154627528916233	1.31069e+16	819742482010743
CCNG1	-5335458652317991	8332240366217246	2.04387e+16	1528204457503126	4379932461124006
SPARC	5553166495696909	7827474410012436	5087117787270756	986.313	5128.83
MARCHF6	4643383933095263	7741958841780472	996213831205959	3.18228e+16	6559180806780648
ENSSSCG00000017106	2.13021e+16	6420487618014697	4.71035e+16	8281823742178371	9496421904211908
NDUFS6	3.08439e+16	7844146209555036	5039026963015197	9434088149802124	9829972948730832
H3-3B	-6975285312354663	1.2396e+16	7310822480130309	6854054867136526	5098354207108835
GRB2	-1.51697e+16	7.83911e+16	1.06159e+16	1.12122e+16	1.10904e+16
SUMO2	-6214543013833205	1090784882576415	588108083165536	1.53044e+16	9192756405611464
TTYH2	2393031084631145	6731362493131122	1.1134e+16	7386240744096249	9220857956722568
RPL38	-5788622488737868	1.14586e+16	5565401155980654	8135017132305574	9406436582462608
COG1	-41444375535329	6886295395348144	4.45672e+16	5043972563111413	8049557961590905
ABCA5	-5904439834476413	6878033697361243	8860312627564202	3.46555e+16	6843936127927955
PRKAR1A	979697754589298	8459067043411295	8170669325046023	7749977390838153	9293438044979946
PRKCA	-1.46049e+16	7590026183460706	6422053412789121	1.12712e+16	7378971446122735
PSMD12	-1.31918e+16	6.81757e+16	2.48243e+16	1.15124e+16	3730511444439377
NOL11	9884121126194644	7462651259165364	357596637012097	850012672367607	957316252295201
PSMC5	-1.37874e+16	7830910936656757	6769510016109457	9272828980181284	6416938685904919
HEXIM1	-2.99696e+16	7106389541046302	3.38317e+16	5608025125526807	8404948711255952
ITGA2B	4713119781699244	7302233801049725	785923556419003	3753356058105277	7086211644970544
PSME3	-1.08696e+16	6.83693e+16	2.52046e+16	1.12378e+16	3665371407342474
ENSSSCG00000017386	3943358607829062	8041422124907907	9011485328003556	3.42474e+16	6812049832568359
DNAJC7	1.98541e+16	7588816415926959	1.32478e+16	7158765399344419	9123916685438964
ACLY	2.88785e+16	819664473210735	5993146998338461	4.3884e+16	755617886424818
EIF1	-2762020818753567	9999209691035276	6262730541480295	4287256867651651	7517155586826595
ENSSSCG00000017448	8938716618924601	7494936729815967	2321496848598157	1275971889562002	3956164972747604
TOP2A	4813816231619334	7414275405504903	3847644925513419	554184	2.19264e+08
ENSSSCG00000017509	-2.00672e+16	1188835240508127	6379552850461767	4244521893326666	7504013822713965
NPEPPS	4902151811628366	705780638798907	7971066750104652	3719598364214032	7056945532647751
KPNB1	8897378458951558	8713743809205763	6917803450513116	7925373410755897	9326287528300124
CBX1	-7330980457291992	7661396764537642	2.38563e+16	1.22456e+16	3896312426368169
ATP5MC1	8491777398094744	9045049869224360	6679112263256967	9754919514774156	662904962265614
PHB	-4822811168161212	7.81215e+16	4318198083064848	5110973444635168	8079734895378387
LUC7L3	8986197353115083	8425652521735168	5838901610394533	1567560937844799	9353970186483718
NME2	4700293858056261	9405630798910964	2.57483e+16	1.08575e+16	3.60672e+16
SRSF1	-2.73924e+16	7568231784728752	2763047199549016	5991335267659152	8579252704279825
TAF15	7749078852845214	741013998142523	2.14391e+16	1.43136e+16	4.19498e+16
TMEM98	3.91086e+16	8248790052108015	1.17952e+16	2.77454e+16	6203514789545858
PSMD11	2.64196e+16	725064574461044	2504003088018738	6167933486901778	8708796699892346
ZNF207	-2.65728e+16	8501414302172211	6284656861271121	4.27919e+16	7517155586826595
NF1	-4099568120470279	7547147028063307	6603789368560213	4.16426e+16	7423072253493692
WSB1	1.18201e+16	6843752087430321	2400351766270556	1.21308e+16	3866558761402494
PAFAH1B1	-3.05102e+16	7017185264485064	2.96386e+16	9565835093074276	9900009479773828
CTNS	-4979454127469993	86552888799155	2.23176e+16	1.35199e+16	4.08065e+16
TAX1BP3	-9262177137199440	7603127048193587	3.33485e+16	6782658909778957	2713541456151483
ANKFY1	-2.57167e+16	7160620838366217	2.04925e+16	6507748757231486	8856775841769327
CAMTA2	8263565988782817	7331550851233112	198196916743363	159183112705918	4.46399e+16
PFN1	3.80268e+16	9062627968265426	1.34604e+16	2.45972e+16	5859550997629916
ENSSSCG00000017913	6997060520774789	8481139895776543	423625054461807	983578976667252	9972778482085786
ENSSSCG00000017928	4.63366e+16	7799463489672242	1.05544e+16	3042581776361759	6451034824112456
GPS2	1.63085e+16	7422582533682558	8926306832484798	7651161102550162	9283408804427532
TP53	-1346531847329301	6813331438521523	3682875929636862	5497395026597592	2.35973e+16
ENSSSCG00000017971	3684620175012966	7423132696390659	4.98962e+16	4799567663874912	7862478081235228
UBB	-7658187968426321	1.18464e+16	9464875621023440	7583483806203727	92803620955048
ENSSSCG00000018055	-1.75445e+16	8194579843165227	1646669787014916	4.95122e+11	7326189760154614
ENSSSCG00000018063	8391537380281812	8491593569160434	5845491414190007	1.5617e+16	9349658523442208
ENSSSCG00000018067	-50440306959972	7728093225475426	9287015327511380	3.35201e+16	6729050426610714
ND3	1520511661580973	837210101298644	1.63438e+16	5.28277e+10	7691715506790956
ND5	5424196958461767	1.10185e+16	4701474209712249	3013675705587116	1.52358e+16
ND6	-304143370046559	8187729326366721	5768127980959186	4.47564e+16	7648357643487733
SNORD83A	-3626259521572849	8192064283777448	9365002713115104	3331795104926565	6727352886215824
ENSSSCG00000018197	1880354220360975	7184295568263105	1.12239e+16	7376089930730539	9220857956722568
KMT2C	-1162309421228062	7485209404182242	4237657168949669	3.95367e+16	1.86417e+16
GOLGA7	3.32027e+16	7.9011e+16	5654725997737833	4.52064e+16	7660668325430213
ERBB3	-2.0509e+16	1.25707e+16	6946258351304033	4045954052900436	7371007383662456
ENSSSCG00000020790	-3.0906e+16	8901547233742537	8523915097210848	3558766705062734	6934641759329954
ENSSSCG00000020808	-1.88098e+16	7.71407e+16	1.07673e+16	7428089553556746	9228070298616572
FAM20C	-2.04101e+16	7501418183566463	1.3332e+16	2.6092e+16	3.0836e+16
RPS16	-7342459290346905	1189693117640816	8521602276758777	7703494462771237	9293438044979946
ENSSSCG00000020830	-3793130131001747	1.17252e+16	1728220778791334	1886382801116944	4.9613e+16
TAF13	3838944530976678	7346274154695923	5010425285028042	9435693813974046	9829972948730832
SDHB	8985504782408225	7711537112890943	3.59291e+16	8496620388572361	957316252295201
SMDT1	-5795187726279508	8845040957371314	3.01773e+16	8235891836294641	3028146089304293
CSRP1	-2.05465e+16	831271517800412	2.41638e+16	8.84787e+08	2.03837e+11
UBQLN1	4.86838e+16	7181389199419227	7992076409719677	3713303774683757	7056945532647751
BRWD1	-2186450249463591	7419097470251852	1852348583027525	666912554592299	8892167394563987
CKS2	6723247691360513	792392649911007	2481464945876291	1.15195e+16	3730511444439377
POLR2K	1.56297e+16	7761288827284884	9620768480979436	7564289175264401	927071131244526
FKBP3	8039412357262015	7543031163169741	2017851128855906	1.55459e+16	4413968674108081
CKB	-1.977e+16	7779042260041071	1.1487e+16	7008494795064549	7185048289791144
CDA	3.85284e+16	7265987814831806	2.56963e+16	3.99584e+09	9.99219e+09
PCSK1N	1.84903e+16	8255312430589804	2.06481e+16	5.51931e+10	1.09186e+16
CNOT4	6683380076590787	6993357683886703	1.30557e+16	2531979615733839	5942841998331542
SOD1	853781750352533	8633338753579356	479626536618899	2852149883618511	1.47227e+16
CHD3	3580462523573518	7437444630263487	4.78063e+16	4893010196593044	7936968411585864
STRAP	1.65737e+16	8178887793601108	2010343709122384	6538872239070039	8856775841769327
HIST1H2BD	20160414368086	6716553667348034	404734917774943	4424076349617549	2.04304e+16
SNF8	-2558467678424749	7944936232775082	4.14811e+16	5195378036104245	8103017655475401
POLR2E	-3589911072164033	7773048966303277	6188148915046061	431488020843533	7522109175624809
ENSSSCG00000021560	-5037386591067161	8630435662319767	1.87341e+16	1710848270157792	4696446231805704
MESD	3130547361014343	7697276179697766	2521779015911605	6155457078366925	8697928480301089
ENSSSCG00000021591	4.69833e+16	9548851847082666	2730967510000004	8687421809590193	963543775806624
RPS21	9668443431092182	1.09552e+16	1.52727e+16	6959426176484856	9055917535551354
HPN	1679762952340723	7329547294073942	7600164720576696	7827908145010911	9323817293141268
UNC5C	8178134373901075	715229075678102	4159743988254874	1.1214e+06	4.74639e+06
GNB1	1079798366079212	7973683744934703	6836738620634719	9791399634039300	9955798825638676
GPX8	7647970396611569	7142848244551174	3.26934e+16	1.079e+07	3.57052e+09
TUSC3	7478236482114465	8259344409414528	3.90389e+16	4817454704930384	2.14896e+16
ENSSSCG00000021991	1.31784e+16	7825614180062381	685706559339005	8829142733743502	6.22831e+16
DDC	2418354356854594	7196437306137541	1.60912e+16	6.03652e+11	8650760921140697
REEP5	1.1904e+16	6830797144880771	2790266331697062	9483846402300740	3313354725478268
RHOA	-2.25119e+16	7888348864537763	2.70607e+16	6029251375256706	8606460786640945
PHLDB2	1.5607e+16	675108086326041	3.94937e+16	4.68888e+16	2.13042e+16
CHTOP	-4255182593099175	7542135019589861	6859350351163693	4075504770471759	738786721340498
CHURC1	-5295620915350399	6.88865e+16	7455132497988416	3879004910333792	7206612538012936
RBPJ	-8818464129604155	7248573913633573	2.90534e+16	8646559016004189	963543775806624
FNDC3A	1.01538e+16	7748695026610658	4499869963470337	3389743117412059	1.65398e+16
ENSSSCG00000022164	2.50671e+16	6908097829194776	1471425475567194	701281135955337	9055917535551354
ENSSSCG00000022176	-7520534748228335	9720715248768488	6624524791626081	1.00584e+16	6805309862694485
UBE2V2	7518808384699045	7761661792134925	2.21911e+16	8815798515495804	965216973921262
UOX	728875245283096	9612194603862856	5661945402778388	1733688282354416	9922366899009552
NOP58	-4.98392e+16	7478637210955514	7780646744827464	3777336853732649	7105094567996256
BRD4	1.6338e+16	7581570041628609	7531738119640519	7837464123691888	9326085272226364
ENSSSCG00000022295	7688010991564843	7603700420878978	1.85607e+16	1.7308e+16	4722710506725373
ACTR10	7826257354515485	7.43012e+16	1.70135e+16	1921117225152901	5030839352198964
MAT2A	-4853981724231402	7.85432e+16	1226549768422156	2680790767542738	6106432036204985
ENO1	7818948938045182	876343573378877	5489473831349875	1.91313e+16	1.0847e+16
NUCKS1	1181663900009583	9344720795402024	1.52704e+16	9.31652e+10	1246770179338314
SLC3A2	-4384473188116014	7662336556029938	7813136581066082	3767396773430424	7105094567996256
ZNF644	1.36089e+16	7749395287475004	8664740922751601	7684833485494235	9293438044979946
CALM3	1.2461e+16	7956495014258287	8136349011887413	4338655577914372	3525157657055427
BEX4	-6474006292581647	9196040466250556	4539547047260939	8312785037104268	9497343859089622
TIMM17B	-5878384486997571	8296335563701842	2746549764302937	9746453932402378	3370935692986837
CLTC	1.06309e+16	7870201168227067	5506423077302668	1.89468e+16	1077596790380256
ZNF638	2655645313682	7459722355507041	2.39339e+16	6246842840460186	8758036660883999
PRDX6	1032134016804984	7248345493307779	3346200108825374	6736034202072512	2710719662257178
ENSSSCG00000022757	-1724586238815066	7849812926409117	1121043315748107	7377609862144174	9220857956722568
NOP53	6192323280412283	821524383810604	2960674664467261	8531233683390155	3081368957212392
PLEKHO1	4432936869841606	6.48645e+16	1.6056e+16	6886414718089765	9047085758242758
PNN	-1338509388614841	823969795037671	1.41827e+16	7064713609119682	9055917535551354
ENSSSCG00000022842	-2.34092e+16	6878979767723594	1.09062e+16	7412151203673142	9220857956722568
PJA2	2.06626e+16	7324155275700691	1.24082e+16	4274435791760924	4714832206669625
ENSSSCG00000022864	-8739746253045416	7.89167e+16	3343520429662669	6747011027486272	2710719662257178
SNW1	-2382307194652619	7300760501326599	1.86087e+16	666193145589203	88890874264835
PHF6	-8803118135854254	7073521822078626	3059519005840933	8026542608785776	2.95715e+16
UCHL1	1.99776e+16	8582697952222265	2.53272e+16	6147805049815315	8693865727011556
NFASC	-1.77986e+16	6842477185091744	6196359948220667	1280133202137339	8117917867212393
MCCD1	-2.01627e+16	7326822174404602	1.26972e+16	7215919629677525	9151898066908080
SCG2	4686619799109881	7.56819e+16	3439965283968626	4.48803e+06	1.60161e+08
UBXN1	-6473956928755921	7794331107061541	1.53739e+16	2.15007e+16	5450042623488277
BZW2	-3.08278e+16	7524016086799439	2.74594e+16	6002665759752664	8583304183018049
KHDRBS1	-1488374723209857	8886169055960444	1.73657e+16	6768821340702235	8946445054522925
TARDBP	3.56792e+16	7462239240033851	4.78574e+16	4890690883433999	7936968411585864
IGF2BP1	8432589019732736	7358800810014749	2.30103e+16	1.29288e+16	3988212604947164
RPS27L	4.9882e+16	8529889398022949	2024792000719093	1547501105093965	4407593131879525
LYPLA2	-8124093377814101	7327904133646827	2.32365e+16	1.2742e+16	3956164972747604
NFIA	4.95347e+16	8731995342139314	9581239824960040	1.26302e-06	0.000208973
NONO	-6420879193040586	9223626511789172	4619293987329922	3.16142e+16	1.57207e+16
NDUFA1	2117538018732356	836103225091537	3378039096946659	5610995980316473	8404948711255952
SRRM2	5280350502099469	7898530753236723	1.5105e+16	2.19063e+16	5484109682634171
ENSSSCG00000023322	-2390916669976669	7631641607645259	1.96315e+16	9.39085e+09	1.70913e+16
ENSSSCG00000023324	1.11332e+16	7081965857122092	3872444458004827	4.9085e+16	2173592892803555
PNRC2	-1.27288e+16	773560165756579	7312304293979677	7868427499484869	9326287528300124
UBL5	-1667732891761464	9828626120016722	3699060167467222	5430555015156892	8287370595065584
ISCU	1.5701e+16	7403811998484944	6348090095452674	8010764925527224	934450780729232
TIA1	-5277164189461927	7279222175066432	1.06406e+16	3022920284289335	6442811741176322
SNRPE	-4660490232265496	9784968488643118	2.90294e+16	8647110963399534	963543775806624
TIMM8B	-344474783111213	839445854107173	8798628984859502	3.48239e+16	6859257622739913
PARP1	3.49685e+16	724164056397749	4.15619e+16	5191310808674676	8103017655475401
CTSB	8188454527434939	7069877774287367	2.2488e+16	1337177858377285	4056106170411098
SON	-5383564307308967	926053961899819	2.97102e+16	8476840855679571	3079411248969425
TTR	3.22295e+16	8871325047675262	5847060806461506	20.6351	12950.3
HNRNPR	4.38816e+16	8636606991433627	1.63442e+16	8982719688629124	9700223139444228
MRPL27	2594449781226395	7294832640113862	2.46292e+16	6196983969625791	872949754235212
AZIN1	-5179877574760695	7474414892995305	1.03317e+16	309414803762521	6482105763913467
RPA3	4085140334350471	8425972663740978	1217570861937383	2.69838e+16	6131081737976604
ATP5ME	-2.0707e+16	9022684463869452	4.34383e+16	5098462816372515	8079734895378387
P3H1	4533708115300908	7671201803453181	8456547272175672	3.57785e+16	6964361543573236
H3-3A	-1.01068e+16	1.17761e+16	1.17634e+16	6040673880828144	6354928591391458
PHF21A	1591872487191156	7371810301443412	8544597804435696	3.46549e+16	2.93358e+16
RSL1D1	-9380295386072516	7406113188611075	2223274707234218	1.35944e+16	4089568322008658
GTF2H5	1.2794e+16	7949468445666153	8955138848850844	2.7669e+16	246851022057004
PAFAH1B2	1.54027e+16	6997053646293132	7600197527225838	7827903574588031	9323817293141268
GPX4	1.21087e+16	839609770746506	8254087049814629	7738831816237265	9293438044979946
VAT1	-3358963181870682	6912496507430809	3.09841e+16	5777775608235728	8453015761245196
SNORD12C	-6694864898786994	7981591638327573	1.95812e+16	1617141972967486	4.51411e+16
KPNA3	-1.74753e+16	671734651865436	3648712406990508	5.61126e+16	2.39168e+16
CCT5	-4.91503e+16	85071130240577	1.48873e+16	2.22413e+16	5537511460285995
ENSSSCG00000024144	3608008191751684	7642225182975804	5381517033606366	4631997314579766	7762647433273642
AIMP1	-1.82955e+16	7863940427350196	1.75363e+16	6753892821095777	8933201260460985
TASOR	8445262731541145	7103057699643692	2.05005e+16	1.52202e+16	4379932461124006
ALKBH7	3151087592957457	6776306769566658	1.2892e+16	7195546925397821	9142416649164116
RPL11	-3.39596e+16	1.26124e+16	1.79358e+16	1.8049e+16	4841386499235343
TMEM50A	1.23354e+16	8003797309998818	1.02224e+16	7491772405277255	9244085272952274
NDUFA4	-6879729750765817	91272281222049	4.37659e+16	3643584993292936	1740505167399775
COX5A	4.97141e+16	86547123696462	2203808868365154	1376701965038987	4.12661e+16
BNIP3	-4.18143e+16	7442678400525449	4048016695918957	5246198353603826	8132948043917345
NOVA1	1.98233e+16	7.92921e+16	2.43397e+16	6217631979609568	8746057964867706
PPP2R1A	-1.50572e+16	7489255484986656	7137688299815426	7893424892342954	9326287528300124
SNORD35B	9529854349755356	7117640999152744	3321643494516824	8553835809128765	9609864921366884
UQCR10	2831977623674251	8604024092221808	6502063494831672	4200389138962882	7458251934548727
ETV1	1.07411e+16	6981569587720977	3198503160476078	7370570001432214	2817229592648909
ANKRD17	2.47108e+16	7946067541648861	2951941037542234	5869110918570394	8491082568996914
UPF3A	-2.46153e+16	6992965182676586	1.98468e+16	655960255981341	8856775841769327
RRBP1	8246790337790295	7287253806908539	1.69481e+16	1.92968e+16	5038756603985016
MRPL17	-3490749161563336	7838271584657	5967784790838977	4398098288001149	7565726733612561
SNRPG	-115092655345599	9595802388933498	1.56547e+16	6923560054830089	9055917535551354
ATXN10	8776886900809771	7.86503e+16	4.38616e+09	9983289791635138	9998942974100888
ENSSSCG00000024974	378276575565332	1.17997e+16	2.36733e+16	8777190272165455	965216973921262
RSL24D1	2.47609e+16	7688725211905529	2.80471e+16	5963924254286951	8562003432997616
CDK4	1.29179e+16	7994053865245232	1.06618e+16	7440283527635236	9233722389162312
PLD3	1.77945e+16	7156218613678857	9368423390504012	2207553147722303	1.99888e+16
ZSWIM6	-7313039382959822	7.11301e+16	2044182655450943	1.52789e+16	4379932461124006
ENSSSCG00000025281	-8189985235079699	8551264463662841	6009566516787419	1.42285e+16	8719161929180785
NDFIP1	-5.99573e+16	8020395042110719	2.1067e+16	8845966892827714	965216973921262
ZNF146	-5481973498155192	7991108490416017	1.42143e+16	2.33168e+16	5658207397379901
PIK3C2A	1.65309e+16	6964979146651587	7810778270303631	7798782521804453	9311934103655642
MIB1	-1.64789e+16	8110390039693364	1.84593e+16	667455126344889	8892886749251083
MDH2	-1.08296e+16	7386193422581056	4393914613894114	3606741047758498	1.72744e+16
RPL27	-1.64844e+16	1.11423e+16	3.55411e+16	5510660292272411	8343928229563884
SNORD33	6839609283566677	7064412306212213	1.64233e+16	2.00006e+16	5170603767698396
POLR2G	-1.68239e+16	8401183781030854	2.19845e+16	639157704982704	8812207105972734
CXXC4	-4.72912e+16	8041517711087675	1.21812e+16	2697301236436862	6131081737976604
CDH1	-1037761904894878	6970935665196264	3306103549978557	690229699034732	2.72498e+16
SNRNP27	-5571090243826613	7768804084081596	1.46997e+16	2.25351e+16	5557439565028572
EEF2	-6684405175393068	1.07839e+16	6596845905278889	102159583174427	6835677991818277
REV3L	-1.25453e+16	7647431550609044	570652913009842	1.69019e+16	9803232613274416
SNORD15-1	729952281227265	7717782386985746	2.06478e+16	885742567504675	965216973921262
KDSR	-2.47605e+16	904360732087821	4919851436958679	23132.6	11694.8
MDH1	7532695216218377	827670613162522	4217891735696666	8372791002272196	9516836341199512
SLC10A3	1.20573e+16	7391422997545271	472693402630775	2.96938e+16	1.50957e+16
CALM1	2.20641e+16	9652885242925452	5812501853805228	445822705002499	7645486192634089
SFRP1	4014065427078396	8707490161777132	5.51605e+16	1110.77	6317.49
SPAG8	6.43833e+16	7.07812e+16	1428712014859279	9904632133130138	9992478094399584
HEPACAM2	1.59512e+16	8891413684650182	2.29736e+16	6317197420526905	8803445103643927
PDHB	2029624065949644	7202684514660748	1496568374400341	6988635126172623	9055917535551354
ZNF277	-4.5496e+16	7731860776637942	984190483746022	3.21166e+16	6589886129626241
URI1	-4972864367091844	7113771577167982	9148148337957184	9238017672058352	9783423465419306
IGFBP5	3.94371e+16	780675410507309	2.74169e+16	1.63993e+09	4.5918e+09
RPL18	-268976657244334	1.215e+16	1.08327e+16	2979668127320835	6417746735767952
PTP4A1	-1.14394e+16	812571631414858	9432278185452332	2131992737132102	1.94986e+16
MCCC1	6618460383323845	7166875189122138	1.55209e+16	21282739486441	5432620738474421
EIF4H	-4.57054e+16	7706354418014441	9608957906497616	3269612871387143	6670080960464299
SLC38A5	-1409251767125062	7.09171e+16	8113022664120003	4394838405091495	3.53921e+16
ENSSSCG00000026064	9970912409019346	8391278418608836	6753593605292664	9355906066371340	6425565675772014
TXNDC15	1.50434e+16	7127282562410228	7019340560070924	8063392179664378	5800542990904809
ZBTB20	7181243335358672	7.98124e+16	2.99571e+16	8348536974557733	3.04496e+16
ACAT1	-9465572602097640	759019012640684	2.58851e+16	107641369248465	35880456416155
NRXN1	2.67087e+16	7337195663746172	1.4293e+16	1564432958149522	1.93692e+16
SRP19	-5854712729651166	8800115729791557	2.90831e+16	8812403922228257	3.16343e+16
STMN1	-7450022388576815	9573082826231454	6830472190340561	8961557104347758	6268323051102724
PPP2R5E	4.57622e+16	7123959713446901	7745571836441014	3788109327885963	7114921544636174
ENSSSCG00000026414	-1.68456e+16	984280041127391	3670829145666581	5445986391043098	8287370595065584
RPL7L1	5640991050778384	802371455847015	2039126672781019	1532976361393402	4379932461124006
ENSSSCG00000026488	-9499497921111944	7665905315757869	3.76521e+16	5232924740142915	2.28439e+16
TIMM50	-1.7983e+16	7001746736728534	1.065e+16	1.1007e+16	1.09469e+16
EIF2S2	1.73311e+16	7685333413607213	1.21703e+16	7271952291053365	9197326733646368
DDX46	2.3239e+16	7341132668435833	1.88504e+16	6641644747342235	8868520499018978
CARHSP1	-1.40612e+16	882058371095973	1.6633e+16	4.5355e+11	693664132712828
PHF14	1588861464572609	7347604354224123	894493838265078	7648783204385884	9283408804427532
HIPK2	-739022489612541	7887562913340167	2534983076305028	1.11348e+16	3.65141e+16
CCT8	-4870257579251286	8670683769915126	2.18856e+16	1.3904e+16	4139075523286461
DHX9	4778320986635512	792256902259095	1.35887e+16	2.43734e+16	5831453213746444
GMPR2	2.20408e+16	7213866288603052	1770349732458968	6739338181891467	8920433084394523
ENSSSCG00000026960	4.68138e+16	7539927655394027	4519738581003292	5013990880687664	8032978347580589
A4GALT	-3.00552e+16	672803188671575	1.18554e+16	5749580586102118	6.11944e+16
KRAS	8710048277143173	7203179263636221	2853733556689908	8658517234473142	963543775806624
ENSSSCG00000026981	5146967246512175	750532593902597	7793225726748583	3773484012273237	7105094567996256
FAM162A	-4.05045e+16	8023108955317145	1147092680981353	2.84159e+16	629412878745135
ATP5IF1	4209176477230787	918328704193562	1.83594e+16	1.75427e+16	4.77247e+16
UQCRFS1	1.18957e+16	8160303625952004	1.05415e+16	745425937967038	9233722389162312
SCP2	2.97529e+16	812391856454511	5792862410805566	4.46592e+16	7645486192634089
ODC1	-1022480271383112	702536854556326	3624247038617591	5694333377348181	2410159708552021
MAP2K2	-786683944878273	7560401960096151	2.45352e+16	1.17262e+16	3770610868878516
PCBP1	6434535310286947	8343959340470844	3.24915e+16	7146030505277703	2.76719e+16
CNIH1	-6514935906414185	7188861814831808	1.37514e+16	9066491046831184	9700223139444228
PSMB1	4341743944506889	8658762697558181	1.50352e+16	2.20131e+16	5503263114636555
TNPO1	1.09331e+16	7105554920250032	3933961605573299	4.73203e+16	2.13195e+16
NDUFA11	-6927772354632692	7539894561656543	1.05928e+16	3.03379e+16	6442811741176322
PTCH1	-9648871286464468	7820714938586371	3.41002e+16	6480184697877496	2650322730367875
NCBP2	-4812708304923088	81646233799583	1774866127601051	1.82781e+16	4874215487312769
CSTB	9559480001893128	8089518402624742	2239070676084994	1.34562e+16	4074917371177296
RPS17	-5011642875025948	1.25147e+16	380465015169942	5.11105e+16	2.24147e+16
CBFA2T2	-2371965388497258	7048085568521952	1.44839e+16	1.41361e+16	1.79914e+16
WWOX	1894329528269579	7479554275332038	1.16843e+16	6303122036335013	6518001196664615
QPRT	-1.03834e+16	729032433824359	3.72955e+16	5.34577e+16	2.311e+16
FBXO22	5569405897586615	760667360471152	1.28063e+16	2577821604760876	5984228725337748
ENSSSCG00000027491	-4.23755e+16	7176583451033868	6772803175064517	4.10525e+16	7403028942451217
ENSSSCG00000027538	-1.12244e+16	8857737281993737	1109155838106446	9734321709107198	9941899837584232
RPL29	2.91735e+16	1.17333e+16	1.38978e+16	9061557058476036	9700223139444228
FOXP1	1.79816e+16	881185070468309	2587135978336251	3.64944e+09	9.3549e+09
YTHDF2	-6256638430255652	7526996474979549	1.34527e+16	9076637366194242	9700223139444228
SS18L2	-3.28837e+16	8023193632948326	7437641882126345	3.88458e+16	7206612538012936
DLL1	-3156125135291478	6828111437027402	1705087319669267	3.63916e+10	5660921342798834
ENSSSCG00000027746	28017046505283	8679683750483026	7246422816212059	3946253655331016	7247408327651312
SLC29A4	2.13252e+16	6505345973197135	6759063395874254	7948776676731648	9326287528300124
ENSSSCG00000027840	-443486830627365	8339629761422147	1.60436e+16	2.05287e+16	52622772946873
ATP2B1	2.79959e+16	7871121944582253	2.79563e+16	596988041564504	8562003432997616
ENSSSCG00000027907	-6727789697654423	7936184913693921	2342087527835092	1.25921e+16	3944504157502418
LSAMP	3255524405776261	907120274044488	7230844167597552	0.184058	18.6103
MRPL50	-3.33941e+16	7178367497251077	3.46702e+16	5559857497077255	8369677952589417
ENSSSCG00000028035	3977313190535323	7466491128617386	5714214144132369	4.49695e+16	7653869073784212
ENSSSCG00000028092	-1.28657e+16	8219396087703116	1.29735e+16	9712673956557320	99365186064836
GPBP1L1	1.1153e+16	6829653595704298	2.18e+16	9882197979597988	9975374555112776
CAPZA2	1370444530352697	7652868446712286	5692845685707324	1.70342e+16	9803232613274416
SNRPN	-8842926270651914	8784618474387411	6.26044e+16	1.23464e+16	7912111482411466
NAA20	2964987994578238	7.41811e+16	2981118121129164	5850685734146502	848008326500817
SLIRP	-2801788390838136	8228994795290415	62766463149754	4.28213e+16	7517155586826595
TAF7	4.49484e+16	7781138194787804	9313492819823064	9231183600044648	9783423465419306
RPN2	2.30278e+16	7190803475273061	1220657138087109	7268047665218864	9197326733646368
XPO1	2.7734e+16	7279167920359307	1532197630642207	6954772325147158	9055917535551354
ZFP36L1	1.97153e+16	7.76055e+16	1.38328e+16	1998224449919575	2440784227418541
SNORD58-1	-2.59017e+16	7400796289509955	2.4956e+16	6173849598986453	8710392457484762
MRPL9	-1.2504e+16	6941498021333078	4290764219515619	8358992749518456	9516836341199512
ACTG1	-6349603638366069	1.21978e+16	6063373699692285	1.38014e+16	8569390511412316
ENSSSCG00000028414	2.44274e+16	924379473773301	6178702748520948	937347029385603	982174791481784
EIF4E	1.10216e+16	7.51329e+16	4464913197141954	8326505205532507	9501090579353708
ENSSSCG00000028423	-1.26908e+16	8849045078365096	1.41233e+16	7070581768142019	9055917535551354
PCBP4	-2.07871e+16	7778819916589446	1.74878e+16	2.89161e+10	4.57629e+16
C16orf72	5775517772551667	6980627188163641	1.04088e+16	3.07618e+16	6464947602958543
SNORD33-1	-2.36332e+16	1.06381e+16	902578463648581	3420912699051178	6812049832568359
YBX1	1.61002e+16	1050742067037215	3928820125013812	5307883706633161	8193679682843386
RFC2	7733033140518855	725026725030308	2050738123567084	1521324178581412	4379932461124006
RBM8A	4.13019e+16	8285934906428738	1.38805e+16	9062138224467314	9700223139444228
KRT10	3495081469958225	7.49199e+16	4.14344e+16	5197727034799825	8103017655475401
ILF2	-2603836910571675	8850588528186524	6098122294728856	4.34859e+16	7537547642200005
TM2D2	1.43007e+16	6811923171349416	3509574306750055	6101513124738677	2.51248e+16
MMADHC	1.75315e+16	7733747894363524	8725592801344373	7676950976306841	9293438044979946
RAB18	6876684880382364	7640947464655144	1.74469e+16	1.86545e+16	4.93477e+16
PDE3A	3908214374234766	7.64585e+16	2.60031e+16	3.40868e+08	8.86258e+08
RBM25	-2.39673e+16	8197777545178775	4054618288222953	5242819359511839	8132948043917345
CEL	-6522735146240215	7595624808152859	7326031455885959	0.011363	12.1651
ENSSSCG00000028695	1.55073e+16	7154343069437999	8087306455599341	7761177290128785	9299106430569052
USP3	62182888471764	6980435036264174	1031087071627578	3.09903e+16	6482105763913467
CCDC181	-1.38678e+16	7761667332370717	6615183491952084	1.01113e+16	6815759832536747
RPL26	-3476092676550709	1.2714e+16	1.73757e+16	1874473341678721	4.95144e+16
SAP18	-1.18449e+16	8897060804595618	1.05094e+16	7458006545092637	9233722389162312
CAND1	2079054337973058	7014242508486035	1.43744e+16	7045870897212745	9055917535551354
IPO7	5643374570945732	6762214834084867	5117769717816087	4.74371e+16	7858658738173757
LGI2	6462711643507776	8592996123447936	3074139295752465	8608185834648509	963543775806624
PNKD	8399348196862112	800678091358188	4192220678793776	4.06099e+16	1.9049e+16
MRPL55	7663237961039837	7962466051923921	3.54761e+16	5963132457339398	2.47868e+16
SSRP1	1.32725e+16	6982451470893014	4.80744e+16	2833711980705219	1.46933e+16
IDI1	-3.73618e+16	8330177550201906	7447884580317163	3881312687038859	7206612538012936
PAFAH1B3	5809773792618489	7551962724652973	1.25445e+16	2627039360094706	6052166627053627
KMT2E	-6701045026413972	759042632710571	1.89178e+16	1.69002e+16	4.66742e+16
ADI1	-1091505992091477	7777961972597827	4.62454e+16	3151769166828549	157156709140492
HIGD2A	-2897675085995499	8731656939599942	8178823888332786	3658000339008793	7021048154088095
SEC11A	-3839169861124624	8496829743975931	1.23538e+16	2663625209021486	6095060022404163
UBC	-1.84186e+16	8030288537815702	2327956490643962	6294586004803748	878538844228744
AKR1A1	-1.11667e+16	7904089424503964	6833170057837951	8948031665183726	6268323051102724
CHMP2A	209178026761843	7415758827499515	1456382795962734	7027389168736582	9055917535551354
DNMT3A	1.23439e+16	7300656170729771	4528175709268957	3.33411e+16	1.63202e+16
RIOK3	-4.78633e+16	7371355872623045	8564006455469299	3.54748e+16	6929370883973759
NASP	3152914058290984	8085580907754833	6200815588279308	4.31017e+16	7522109175624809
SEC62	2.30427e+16	8217733712117008	3827227516154843	5361496559164595	8248456244868607
TMBIM6	-3.60422e+16	8427956791211125	1.06756e+16	3014968510556624	6442811741176322
OLFM1	-3.59283e+16	6588961164367513	1374429441745212	2094560758202417	2507960907847631
RACK1	9620306651446376	1.10337e+16	1116453739512977	7382786208720623	9220857956722568
RNF7	-3230605062553813	8046231456805067	4638715273205918	9456995708487412	9846528712498334
SELENOM	-1.70562e+16	9476448528302932	3265003843790257	1.10337e+07	3.58596e+09
RPS9	-1.82378e+16	1.21991e+16	5480473648491913	4591166391707137	7708415897515674
ENSSSCG00000029830	-4.35119e+16	1.23498e+16	2.90106e+16	8647546282676783	963543775806624
ENSSSCG00000029857	8435459644831441	7207331938922941	2.45472e+16	1.17172e+16	3770610868878516
PCGF3	2.1819e+16	7638264078839535	1.96138e+16	9646752430386132	9906925260182964
MED28	5070317656442086	7126042092489686	8883861266620268	3459150272511364	6843936127927955
C18orf21	1.53871e+16	7051425271921516	8230896302058355	7741924228093456	9293438044979946
HNRNPUL1	2.69429e+16	7374329074941525	1.95796e+16	6581359143275781	8856775841769327
ZBTB16	1.61358e+16	6804151146489305	5318057373815033	8176184691828409	9422439583329674
SELENOF	3.43998e+16	8572194348204889	1.03131e+16	3098510634124291	6482105763913467
DPYSL2	-2.40252e+16	7058896053571831	2120246220100649	6451851331623835	8827709229452704
SLC25A39	-7361280406460909	6706821528918656	1.06587e+16	9177717262361284	9761520565837046
NBR1	-7953306699014554	7399727911343306	1.88662e+16	1.69584e+16	467436448662722
TRA2B	-9466907947710014	8991399447514041	7753625738638537	7806643855354224	9311934103655642
PFN2	5472917543854914	8721348060772423	1.98695e+16	1.5866e+16	4.46301e+16
ZFAND5	1.1437e+16	7104757704525121	4.47568e+16	8324518354350101	9501090579353708
NUTF2	1.17757e+16	8312850558207451	1.02645e+16	7486782909184969	9244085272952274
NDUFB10	3958622457510029	8122265124547344	1.10656e+16	2928318779899982	6376325088678152
METTL9	2433860149006267	727229821651773	2.06437e+16	6495746384745957	8856775841769327
ENSSSCG00000030478	1.674e+16	7204492102062706	1.04145e+16	7469104808409663	9241176581444994
FBL	-2838028927342796	6821638961210546	1.44984e+16	7033760758616294	9055917535551354
HSD11B1L	3.29689e+16	1.19404e+16	1809236374130041	8930009981310352	9685708084615516
IGF1R	109100707849292	8462874764746376	7312280007306057	6848497887621138	5098354207108835
SSR3	3843938964487146	81294490339758	102570963449931	3.11168e+16	6487132233060209
METAP2	192272129290206	7764151019742833	1.68201e+16	9672860542497320	9906925260182964
FNBP4	-1158556505015862	751823320984589	3353602490401286	985389281292809	9975242732938388
UBE2V1	-1768198242945014	7698058095700197	1307580210595276	7176473878685049	9140085695736032
PCNA	1.12363e+16	7467153065021968	3635143150094828	5657173932980144	2.40562e+16
ARID2	-2.60699e+16	681642676861751	1.43791e+16	7045407619269357	9055917535551354
FUS	1.72572e+16	8608508135857857	2.13407e+16	9631540598377036	9906925260182964
ENSSSCG00000030849	2.28043e+16	1.13092e+16	8296368235762532	3623775662698877	6990461358329013
APOA1	-6562620486753296	7739604815646666	2.0413e+16	1.53078e+16	4379932461124006
XBP1	-1.45817e+16	867359144326874	1935350134095085	1.0862e+11	1.93812e+16
ENSSSCG00000031023	-2507593509782178	1043021849184551	7037122496679714	4.91314e-05	44.7096
BABAM1	-1.03766e+16	6959205982194579	3.2512e+16	7137097794760609	2.76719e+16
RPS7	-1.08758e+16	1.29636e+16	1.89874e+16	6630216149563355	8866269942840048
PPIG	7855525134512542	7340671151084039	1.59946e+16	8993600660033381	9700223139444228
SIVA1	1.09945e+16	7968966616668703	4.44362e+16	350319210909808	1.69569e+16
ENSSSCG00000031152	9508584062292916	7428499759656527	3.0991e+16	7833555320310898	2915556376884629
PRELID1	5572688944919939	7620529935746874	1.01091e+16	3146846159578498	6537968048439345
STRADB	-6462946730589935	7058526184346605	1.54097e+16	2144741153529912	5450042623488277
MRPL57	-1.04182e+16	8198032152248892	8295176513535285	9770230257130822	9955798825638676
ENSSSCG00000031299	5554097405870265	7193631986901864	1.01418e+16	3139029770739943	6529181923139081
MARCKSL1	-1.37447e+16	1.10665e+16	2.81918e+16	1.09871e+08	3.12444e+09
ENSSSCG00000031381	1.32977e+16	7101143417394872	5443482052204371	1.96415e+16	1106733303231056
UBE2E2	1.26788e+16	686595847317811	3.12359e+16	7716672092828065	2881807830777187
KDELR2	8012853176472765	7189649030705357	2.10433e+16	1.46883e+16	4284075023625356
KMT5B	-8486362867859851	7683139282319747	2.03902e+16	8864526300941503	965216973921262
ZKSCAN1	-3.65704e+16	7087646131077295	5054551639239651	4771129273008666	7862478081235228
CYBA	8841120755244004	7.68889e+16	3183502814333558	74385110433043	2.83224e+16
MFF	-4.85864e+16	7763504820956486	1.09359e+16	2.95676e+16	6378426997813947
SYT13	-2.84642e+16	777097443895123	2.48795e+16	6.10284e+08	1.48096e+11
NUDT3	-2.18045e+16	1.13101e+16	7912139910562539	3737332935485827	7068341435251074
ZCCHC17	-5160439547397153	7818509443940033	1.37786e+16	2404668002029071	5799121724266563
ENSSSCG00000031661	-9245166917434164	7694436671179188	1988015646763512	1.58549e+16	4.46301e+16
SRP9	-6249656228899896	7498958446707613	1.45147e+16	2282929548292657	5599638514680102
MACROH2A2	-4.20596e+16	823746249548829	1.48154e+16	2.23534e+16	5540217513322089
PSMG2	1.55787e+16	6788678018532977	4679766775659466	8287323296056676	9496421904211908
MGST2	-1.88318e+16	7851362706683243	1.69296e+16	680738253042587	8971351343501146
ENSSSCG00000031773	-1136409837287227	8086307332736022	8526332225867561	7702875112841985	9293438044979946
YAF2	-3.94329e+16	7030025760096773	4893306654987746	4842260312264358	7895249822385333
ARL3	-7583882454205363	82375336126244	4921071250223556	2.65311e+16	1395564506760663
ARF4	-6037259826061663	8728710706686332	250992457341175	1.13131e+16	3.68335e+16
RAB3C	1162801143410055	7221466982449507	4170713276146776	4112848157208685	1.92426e+16
TM9SF2	-362238604244711	7677564722478207	5.75256e+16	9395419296537286	982174791481784
CADM1	-1959806116741809	8835186800168277	2.69092e+16	6039412142583661	8614208541929674
ENSSSCG00000031838	-2141115000007106	1263872603368991	7128615480626426	3.98495e+16	7296396130247959
SMIM19	-260658027472216	7031300369707419	2.33231e+16	6291384017275036	878538844228744
HSBP1	3718950764603387	8796065349042106	1.1647e+16	2804929499432734	6240796685779433
NDUFB4	4784054204763221	8743215573690723	1.5377e+16	9013120998493882	9700223139444228
CYC1	-2.58986e+16	8295432413360366	4.44977e+16	5047299238439872	8049557961590905
NEDD8	-4.76603e+16	8709445991525255	2186978614469013	1.39182e+16	4139075523286461
TP53BP1	-1.01071e+16	7277767558744976	3859391470777765	4.94683e+16	2.18525e+16
TAOK2	-1.5395e+16	6979130352792334	7112931203127637	7896995446811618	9326287528300124
ENSSSCG00000032003	-3.86335e+16	1.0362e+16	2283939344930644	8798754733260614	965216973921262
RTN4	9935366382169774	8219865012535882	6165475018519673	1.30267e+16	819742482010743
EIF4B	-4.0174e+16	8086659828648607	8180593656887751	3.65748e+16	7021048154088095
PSENEN	1.0413e+16	7273326730195682	3594546835172933	5796943144397138	2.44223e+16
ENSSSCG00000032060	5425702772417381	7179433559970365	7958362442849833	3723411870140273	7056945532647751
ENSSSCG00000032067	-1.80845e+16	7.56506e+16	7071648536088926	7902964209944984	9326287528300124
ENSSSCG00000032073	1847046445449852	7214509472906666	7772937512383837	7803984037502572	9311934103655642
NDUFS3	1.94882e+16	743479031404996	1.4742e+11	9969365045612568	9998942974100888
MRPL37	-3180790352604776	7426115276202904	3884476183651593	5331165300761026	8222644785919548
DDX5	-1.011e+16	7.40055e+16	389434611679525	4844889550260591	2.15592e+16
RPL7	-9642311604984228	1.28371e+16	1.45231e+16	7031347142534236	9055917535551354
ENSSSCG00000032129	2.54663e+16	1.01815e+16	940671032689202	3321053289562986	6723378183542418
DUT	1.85858e+16	8261648715433077	1.30908e+16	2.96744e+16	3.39669e+16
ATP5MD	-5087429267702664	9161247934305236	2.72473e+16	9880507803516504	3405781098939401
ENSSSCG00000032166	-2.31954e+16	888387244500341	4.82915e+16	487104763553908	7915452407751005
CGGBP1	1.00276e+16	7751300807478907	422965976929377	8370554384173157	9516836341199512
DBI	3290170615885745	8084801086407499	6806582187926353	4093601609844276	7396745306607347
EIF1AX	-3.2316e+16	7584889070721303	4425010352569026	505917775843297	8049557961590905
ENSSSCG00000032242	5598654921501434	7813245368920234	9966460375842598	3.18123e+16	6559180806780648
TLE5	-8389357794344769	8061822877500374	329082801766134	9855266576390200	9975242732938388
RAB11A	2.5836e+16	8393665222886282	5237767755184856	4.69235e+16	7818392470700721
C5orf15	8479392390107345	7.14837e+16	2.54879e+16	8731574291131788	9641543041294024
SELENOH	-5321090259433319	8229858181880719	2.15385e+16	1422124667707666	4184512953599616
NDUFB2	-3.44619e+16	825383032640911	9668516689983364	9216713561364036	9783423465419306
RAB5C	-7188701262208547	7027337308845363	1.80311e+16	1.79337e+16	4.8283e+16
ENSSSCG00000032573	-3570080985219937	7387445810935921	4887557288159582	4.84483e+16	7895249822385333
MGST1	802874794590942	7425867839377673	2041116004228316	8863947228516372	965216973921262
SRSF5	4295325381949815	8053227158410792	1.17968e+16	2.77421e+16	6203514789545858
ENSSSCG00000032594	-6152367615287114	6947720444434927	1.10629e+16	2.92891e+16	6376325088678152
RAP1B	9252589192442532	7768170155219062	2.33178e+16	1267568008388967	3956164972747604
CHIC2	1.93294e+16	7399686824862611	1.3983e+16	7084499825188862	9064226218460336
CXADR	6278196161876884	8027549680376294	2.35634e+16	1.24775e+16	3.94121e+16
SREK1	3212506555670754	7444812915293769	3202057590524314	5714840175417313	8406075767152044
SWI5	-2659348552010459	7294993411251978	2.64892e+16	6067792119687917	8641143707223795
ENSSSCG00000032808	2341433408203851	678786377696667	8301993729024641	3960158015841188	3310127024332064
ATP6V1G1	-2882665890276069	9753132076059356	9902005296375548	3196933682382706	6574485086933927
BPNT2	1.73328e+16	6714922676128726	5888764781347003	8082627750981379	9369670386487968
PSMD7	-1.09155e+16	7080824851795956	4.31084e+16	835521266479236	9516836341199512
MANF	2.07461e+16	8741684650555085	3.61638e+16	9520470111004352	9862088342789
ENSSSCG00000032916	8427833715082053	7772828476059994	3.14839e+16	7600180093197156	2856713170086417
SRRM1	-8772212030876119	7749406931716976	3412468018835713	6470560472341853	2650322730367875
ZNF664	1.28292e+16	7908718453318276	8123506407494633	4369496646756971	3.53444e+16
RNF187	671111643501208	7377941425286176	1.62251e+16	2.02743e+16	5226514210654005
SLC7A5	-2.86382e+16	6415356298151189	940184374687368	2.16767e+16	1.97258e+16
WFDC2	-1.18936e+16	7340391118448703	3349435690189068	6722805655036884	2710719662257178
ENSSSCG00000033019	-3.08567e+16	1.16147e+16	1.06473e+16	3.02139e+16	6442811741176322
CIAO2B	-4366679992384079	7294278200375932	6557673517518734	4180582162756526	7437594854561952
ANAPC13	6061620011176502	7.9117e+16	1.86957e+16	1.71525e+16	4.70143e+16
DYNLT1	4460111591403911	8570275392218734	1.74389e+16	8949397631978572	968810294169614
MRPL12	3712502793434644	7652903668367393	5797313367315038	939307645162952	982174791481784
TMEM30A	7971381344170061	7054857792018991	2.05387e+16	1.5182e+16	4379932461124006
RPS15	-1.86959e+16	1.3017e+16	6079285144167417	4355688288047138	7542676198140621
ENSSSCG00000033262	2.74428e+16	1.23778e+16	125668867185178	9107424315199276	9716009527352100
DNAJB6	-1.26756e+16	8099704514836546	1.17289e+16	6153663122186418	6436590162286943
ATP6V1D	-7687364647630209	7519067439055688	2.25031e+16	1.33588e+16	4056106170411098
EIF2S1	3.29278e+16	7084534249878586	3682495118301006	5439599836425107	8287370595065584
ENSSSCG00000033310	-2.77449e+16	1.33285e+16	1.15303e+10	9991432366120412	9998942974100888
RPL37	-2798132586130226	1.18832e+16	1.28116e+16	2576833083133705	5984228725337748
PSMA7	-2938641319819262	8884993867729035	6734566984909911	4118490343249369	7414097353821811
CUEDC2	-3779103015838727	7576675269293431	4867149670305657	4.85396e+16	7901801101271951
ATP5MC2	2.59719e+16	9804615559648216	9070879987598256	9241232716459086	9783423465419306
MRPL20	4858814007334139	7871623341473193	1209895839853399	2713527515236474	6150211802902096
ENSSSCG00000033385	-247641482620001	626574883624997	6739041307195492	9792895114372180	9955798825638676
SARAF	3.51918e+16	7939440389792495	7390305386988999	3.89972e+16	7206612538012936
PDAP1	-5685413853090482	7244736242836028	1.27811e+16	2582502956174823	5987459083105959
ENSSSCG00000033497	1.62212e+16	7338070340846708	9314525412765204	7602160605923514	9283408804427532
SNRPD2	1.41569e+16	1.01772e+16	2812365428491108	5958918858704325	8562003432997616
BPTF	1.52652e+16	7202270818392039	7523208031587113	6090911313218206	4697228216125904
UBE2K	-4.06293e+16	7621228329801196	7006351107008633	4025703701167289	7356205558357897
ENSSSCG00000033653	-1.21797e+16	8157941764604445	1.11832e+16	7380685309410847	9220857956722568
TUBB2B	-2.15599e+16	1.03809e+16	5913314995184484	147.356	957.813
SLC25A6	-2.85903e+16	1.11779e+16	1.17416e+16	2785475468807237	6212702638761239
CD79A	-1.41799e+16	1.11231e+16	3203935003048888	5713712616138166	8406075767152044
RAB26	-7047774415540249	815865052725293	2960335807310786	8533021727665085	3081368957212392
MRPL41	-6851283392612566	772642825566532	1.92909e+16	1648582974262539	4587799714308595
ENSSSCG00000033697	-3172129536470428	1.22269e+16	1232558505765387	2.6691e+16	6095060022404163
GPX1	1.15586e+16	7.92034e+16	732593451229908	6796661569789546	5098354207108835
SLC35B1	-2033455654043116	722283261880175	9155165825733214	7622137341955483	9283408804427532
HMGN1	-1.20457e+16	1.0417e+16	2.16724e+16	6415472742030095	8812207105972734
ENSSSCG00000033734	2409735375758844	9179777062362092	633563382257625	4.26051e+16	7510419059821185
INS	5618476134767497	1.34095e+16	1345786300366753	4.0823e-16	1.0614e-12
ENSSSCG00000033744	-1.74441e+16	7.22486e+16	115588373432704	7338694042734096	9220857956722568
FKBP2	9635260946663228	7893286693978456	5.01125e+16	2518309603935554	1.35094e+16
GNAQ	1.44641e+16	7536819318085579	6265580144952373	1.23106e+16	7912111482411466
PELI2	-1.60981e+16	7593811516208869	1015598024955003	1.43834e+16	1.37778e+16
ENSSSCG00000033807	7167033928357314	7.05848e+16	1.60849e+16	2047044548178938	5254754693491773
CBFB	-1.19934e+16	778230002586643	6677917980088287	976145768610904	662904962265614
CFDP1	4778414762578403	8193590239081637	1.56027e+16	2116259615496397	5417148382845911
LGALS1	4294818469954102	9128655278289688	9830838779582062	3.58046e-07	6.51644e-06
ZNHIT1	-1991165177677814	8029609968608641	2.17072e+16	9628392582856644	9906925260182964
ENSSSCG00000033987	1.67602e+16	8516790267105732	1999458048361129	6547645943468106	8856775841769327
MRPL40	8990754423801645	7427660948012641	2.81205e+16	9355866819837096	3287196450213034
ENSSSCG00000034019	8618841746655571	9990837129452206	8937687922732973	7649708241512778	9283408804427532
TMEM11	-9679424795073582	7.24725e+16	3.54704e+16	5965173696763384	2.47868e+16
ERGIC3	3.19255e+16	7172167963813538	3.59781e+16	5486281535238349	8334751581079962
ARHGDIA	-1524281040814649	7327715611788091	6691943281358848	795876051478473	9326287528300124
ATP5F1C	354390623676732	8333514890598575	922662384267896	3367768867853159	6742947568198845
MRPL33	-1.08888e+16	7402415398857423	3200119465729223	8580250350307909	9615797806379552
PPIB	1149955581171647	9214649513624398	1.27115e+16	363416407193472	4057778288908706
GID8	-5400018706133444	7055074059856576	1.0431e+16	3071012277015962	6461551842970001
RPL35	-1.09716e+16	1.21784e+16	1.9905e+16	6554888346780368	8856775841769327
ENSSSCG00000034230	1.03153e+16	874846477228178	9272786148684476	7607374724894851	9283408804427532
TMEM59	1.12016e+16	9050650410406004	1198852386994338	7291589907473992	9206135810882212
SELENOW	8251309410059457	8806614078120308	6259121989612265	8024463159905794	934450780729232
LSM4	3.56819e+16	7618988095883363	3429755741853313	5581166791166782	8387880726609036
NBEA	4.41655e+16	7352031079404333	66106970059548	4161825525961461	7423072253493692
ATP2A2	8267828531884124	7309202116122188	2220350256848569	881547006584143	965216973921262
ENSSSCG00000034387	501090791364785	7000732884955882	7446372242584607	388179447073002	7206612538012936
ENSSSCG00000034415	-421444332463749	8715313472561814	1.53811e+16	2148990752988424	5450042623488277
ENSSSCG00000034448	-3.45708e+16	1.16679e+16	1.86784e+16	8912923754482591	9684490288452726
NDUFB11	-1.43531e+16	7742350117238194	7194747530123324	7885220798334724	9326287528300124
NEUROG3	-5.22942e+16	1.05864e+16	1905074672207224	2.46356e-29	2.24184e-24
NUDT21	1.56733e+16	8172374508183918	1.54665e+16	6941165745553199	9055917535551354
ENSSSCG00000034610	2.32669e+16	850269648937522	2.91661e+16	6.64329e+07	2.01513e+10
RPS27A	-2690375085046266	1.33193e+16	1.10088e+16	2.94073e+16	6378426997813947
MRPS15	-9698998077286012	8007021426682089	5181855287273226	2.28239e+16	1.2437e+16
ENSSSCG00000034709	1.60447e+16	8295746604348423	2.04256e+16	6513072599162647	8856775841769327
SUPT4H1	-1.86221e+16	7031539910785157	1.14909e+16	9729583097811876	9941899837584232
VPS25	1.15591e+16	7762196425075874	6282477108839524	8020857257042141	934450780729232
QDPR	-9647006105877508	7861692672811429	2.56892e+16	1.08982e+16	3.60672e+16
RAP1GAP2	-1.75866e+16	6888010236842268	6702226836908879	9629257496310056	6588439339580564
GADD45GIP1	-2.88765e+16	875034236425539	7126961566153223	9327214460740854	9809869159496380
PET100	-4277813070203136	7286525068730851	3395587853836428	5600840101168935	8404948711255952
MAML2	3.09502e+16	8677942854338944	4899719382440972	256.329	1.26086e+06
MYDGF	1.03918e+16	7.46207e+16	3.23138e+16	7223969633622687	2786791189739554
SH3BGRL3	-1.18753e+16	9548305693969178	1.51618e+16	9.86774e+10	1.3014e+16
STX8	2606390689458927	7077724958100092	2.48193e+16	9602666094099884	99038685165535
CXCL12	1.00257e+16	8902226545819543	1.22011e+16	2.29579e-12	5.22293e-11
PSMB4	1.96761e+16	7975891925107619	2.35051e+16	6278038859405198	8782498634986519
NREP	-7076808231714045	104329798255472	7.6141e+16	5791375355380595	4485235381613907
ENSSSCG00000035007	-1.52881e+16	1.21472e+16	3480711089175239	555207064664731	8369677952589417
CNIH4	-1.06581e+16	769189575963522	4.98526e+16	2.55641e+16	1.35646e+16
C1QBP	1.98589e+16	7756086339258477	1.86486e+16	9655548780430796	9906925260182964
WBP1	-1.24661e+16	7282517960138702	6015174508409126	1.41834e+16	8719161929180785
PHF5A	55658889896821	7815715729300604	1295004777551533	2551276783959292	5955636456420966
GADD45G	-2.93195e+16	7561246021179457	2.20935e+16	2.59689e+09	5.43256e+10
ZNF292	3104021862483751	7327835860949884	3281220104924674	5667670144022636	8406075767152044
ENSSSCG00000035293	-1187285876758828	1.05278e+16	1.35947e+16	7123439147098103	9094072461256936
VKORC1	7824865296108485	7191221778790815	1842386840298138	892031132535882	9685708084615516
ENSSSCG00000035376	-5892720742501548	71282362348775	1.27745e+16	9100111900308980	9713902439039500
IGFBP2	-1330667263476838	1.11982e+16	2.51492e+16	5.30614e+08	1.30502e+11
HDGFL3	-4146323764269975	7.55932e+16	6834412402028563	4084042581716232	739597761067019
SEC61G	-54312320224851	1.00542e+16	3757704070370549	8462949141588895	957316252295201
YTHDC1	-1.23702e+16	768682510633076	5892092499174373	8082096631525337	9369670386487968
ATP5F1D	5406120025886155	7958619346703161	1.68141e+16	1.94737e+16	5070068988358488
ANKRD39	3459116508740887	7094414574489954	4182812347344571	5177959229727177	8103017655475401
ENSSSCG00000035544	7294028294237865	8292960599943761	3627670108401793	5.68263e+16	2410159708552021
ENSSSCG00000035578	7012487507486772	7722053714053755	2.19638e+16	1.38336e+16	4.12739e+16
DNAJC12	-1413804340168032	7274361650782071	6137185392260385	1.32368e+16	8250324519514592
UBE2D3	1.59819e+16	9194242772336896	2.375e+16	6260178938630738	8764250514083033
CCDC115	-1.09321e+16	8127152571052601	8802328083448547	3.00846e+16	2.61981e+16
HBP1	4.52747e+16	6746754363405405	2.5715e+16	6120847620394386	8689502862026351
G3BP1	-920430139464991	8248258220186594	6958668931115772	7919395128144784	9326287528300124
TMED10	1.61302e+16	8102010804917013	1.42362e+16	7059435902251767	9055917535551354
SFPQ	161037393985815	8992914821051382	22276583367087	6369405248695482	8804270427586566
ENSSSCG00000035728	2.46161e+16	8016889593452602	3816150525045744	5367401525507728	8250566534141947
SSBP2	3.13464e+16	7488768209052667	2.12008e+16	4.13602e+09	8.36396e+10
ENSSSCG00000035762	8630836603498748	7407513964623454	2492276161394172	1.14406e+16	3718200161705833
ENSSSCG00000035768	1.25329e+16	1.26692e+16	2.23977e+16	6360265340861825	8804270427586566
ERRFI1	7195862233916994	7463007241127336	1.31121e+16	2521760450720955	5937468460349717
BTG1	-344850292802489	9473349077105448	1.21587e+16	2701718436185295	6131081737976604
RPL32	-5683715066390176	8798231890257679	2873784332958275	9003294004632059	3.21294e+16
PDX1	-1927465079543761	8045766590192189	2.23946e+16	6360494682399185	8804270427586566
TXNDC17	-7099269995382279	836863928313855	3.71853e+16	847088278046299	957316252295201
PBRM1	-8327774675502605	7631699899824091	2681978846492683	9869338294367620	9975242732938388
ENSSSCG00000035836	-6886102854059772	8934029211893519	4.57844e+16	8305681685985392	9497343859089622
SUMO1	-3130095141267324	8948614085968707	8588266474014943	3540672543695302	6929370883973759
PTPRF	-9245411394056552	734722591962964	2.7104e+16	8692328435930508	963543775806624
C12orf49	-5834412833328785	7242400193918178	1.32523e+16	2.49656e+16	5924041724062836
RPL7A	-4.99866e+16	7455393474017109	7251903663536943	3.94447e+16	7247408327651312
HMGB3	-3.32424e+16	8156915797450125	8321494319783722	3616517338519676	6990461358329013
PSMB2	-1383581199092885	8322205136102284	9726304971194022	7551391365209627	927071131244526
LSM6	6345899850997898	7.22994e+16	1385117800566893	9063124762136524	9700223139444228
TPPP3	-1.66758e+16	6.70199e+16	4932383439545416	263579391666827	1390476790822102
ENSSSCG00000035992	2.06116e+16	7.19667e+16	1.18229e+16	5850816630145924	6190980387712548
RPL10	-1.60341e+16	1.04223e+16	2.42626e+16	6223156628848175	8746057964867706
RPLP0	-5074169696755811	1281364221684853	3.40288e+16	6508271681379646	2655841807199766
PEG10	8512261587330567	8181940980451836	3.17149e+16	7493385105389071	283533490474181
AP1S2	7436571138985906	735602606354619	1466714301683051	2.25865e+16	5562570649301504
TCF25	-1182462373868684	7431381328672057	464916224570938	3.10687e+16	1555124511373639
ENSSSCG00000036114	-2.55215e+16	943193454805924	7649200489107648	3.81793e+16	7148802308193873
COL1A1	580388213936184	855923748350187	1.02856e+16	3.60448e-09	7.28905e-07
ZNF250	6251162437652498	7121948960087233	1376375511963405	2.40719e+16	5799121724266563
MAD2L1	2377896730983813	6725648633510245	6493297270307904	1.08282e+16	7114554471155528
SRSF10	2.46295e+16	7985914165332958	3.56129e+16	5506638436101586	8343928229563884
RPS25	-3205251537736536	1.21122e+16	1.09833e+16	2946323789483104	6378426997813947
RFXANK	-5261822683075512	7261984841113028	1.06034e+16	3031375932651892	6442811741176322
ENSSSCG00000036350	-1.22778e+16	1.03657e+16	2.25502e+16	6348789325577533	8804270427586566
ACOT13	1.70207e+16	6865767538657196	6669474138244297	7962114633995826	9326287528300124
SLC8A1	1.16917e+16	744064276352565	4457338837265397	3.47516e+16	1.69112e+16
CCDC50	-3759160548884656	7167310490293794	5217614836593221	9424164364690624	9829972948730832
GPX3	1.74235e+16	8164666198571867	1.70573e+16	3.6268e+10	5660921342798834
REEP3	-2.94982e+16	7.48112e+16	1.92334e+16	6609808360337542	8858707493446574
PCNP	4.52596e+16	8063789282237696	1.31119e+16	2521792922994688	5937468460349717
EFNA5	6.63204e+16	8373343144539112	6824984814308233	1.44038	11.3978
SRSF2	4.52044e+16	915911960231244	2.13036e+16	1444066226445038	422540278477487
PSMD8	-1615397577198567	8068201840408024	1.57543e+16	6914287051036339	9055917535551354
SORBS2	3429780691450564	7565888365141243	4.60272e+16	4974970250294231	8005699253347038
ACTN1	-1.69689e+16	6982500004738978	8290855159727473	7733938530434468	9293438044979946
RPH3AL	-5493488807029181	7569282676594973	1.00307e+16	3165677303013242	6555697189494661
UBE2D2	-5515472689064673	8131507583107249	2233675120743728	1350323238587849	4.08065e+16
TPD52L2	-1.23564e+16	6930753245005873	3252819993614663	7130068902317696	2.76719e+16
ENSSSCG00000036716	-8605284436791323	1.17159e+16	1.00202e+16	7515868398983944	9260977594495640
TSPAN31	-3.56093e+16	7276828082737594	498995480406281	4799418321913919	7862478081235228
CAMTA1	2.45736e+16	7914199292133385	3.18916e+16	5722597733791969	8406075767152044
MTMR7	-9030310311638656	7328655757742841	2.16361e+16	1.41313e+16	4.18193e+16
TCEA2	-2.19744e+16	7.14451e+16	1.67198e+16	6826138664579858	8989560325278829
SNX4	2.88324e+16	6836789331641123	1.23024e+16	7257770549732778	9192165901540472
SLC25A36	7867107203312973	7485989669111293	2.26514e+16	1323141615927719	4.0337e+16
SELENOT	1.20206e+16	832060701839744	1.13166e+16	7365681706352037	9220857956722568
PSMA4	-3.1759e+16	8326253666135212	7513773570545541	3860405014633728	7198706072370272
NOP10	3.70142e+16	8463202763297536	85605615626495	3.54845e+16	6929370883973759
RAC3	1.57843e+16	7100191496139224	7666564514962807	5625346176403896	439404722792064
PSMG4	-5683437595176579	7581015033793842	9017443372871226	3423144204514548	6812049832568359
SESN3	1.88752e+16	7009104142815351	8265039602942784	4041577955658552	3358754282784732
ID1	2567145204100803	9150829892706234	6764049266945917	4108274303228423	7403028942451217
ENSSSCG00000037030	842419789802976	1.2059e+16	8669845211550609	7684171142753378	9293438044979946
TUBB4B	1.04431e+16	7596654333054764	3933807956109591	4732466930909804	2.13195e+16
GADD45A	-1.5609e+16	867229124726119	1.43236e+16	1.5392e+16	1918725151959646
ENSSSCG00000037071	-9149194220436136	7488697413770955	1.98464e+16	1.58903e+16	4.46301e+16
EVL	-1.27584e+16	7275498475452957	5322775925835937	2.10485e+16	1.1715e+16
ZNRF2	-2.3054e+16	6747473960922454	714178301487927	7.53082e+16	5526653455998851
CDKN2AIPNL	8601252742004082	8312744309456168	5324864545460193	2102324275105738	1.1715e+16
CLTA	-7847495429441013	8398364105875093	4736600859663742	8277116943278334	9496421904211908
ENSSSCG00000037143	-4.53541e+16	8246609072554824	1.72592e+16	1.88933e+16	4961879710703664
POMP	-5777440342390803	8506813807215094	2.82255e+16	9294880556409048	3.27843e+16
TAGLN3	-3119301851033968	9106377027356348	7126174001934496	0.312844	2.99671
TRAPPC3	2.74168e+16	6958103262964427	2.00077e+16	6546590418481759	8856775841769327
PPP4R2	4.97607e+16	7289455244444579	872578818270886	9255763152462942	9783434065344424
RPRM	-1.65438e+16	8056160194629854	1.45549e+16	1.36136e+16	1.74484e+16
RPSA	-4.31343e+16	1.17907e+16	1.86162e+16	1.72438e+16	4.71264e+16
HNRNPDL	4764363778650853	9904847736317286	3.06679e+16	7990734033983427	2950049571575705
MAX	-3.96355e+16	7367572701721074	4.72856e+16	4916761775191381	7962016129409575
PTMA	-1545160498100788	1.26432e+16	3.98081e+16	528081766517409	8172694005626567
ELAVL4	-1.62445e+16	697868238319549	8081973303692411	4470773684018955	35844969625174
TMEM33	2.08909e+16	6820003593210694	6850582705390984	7935248462659608	9326287528300124
ATP6AP1	-1.14036e+16	7084511515026591	4815756856302969	8263008272319718	9494113040165332
TMCO1	4241006888600387	7216540983944189	4353735072341105	5093639610024331	8079734895378387
CST3	1.06871e+16	1.15521e+16	4.64891e+16	3.10732e+16	1555124511373639
TIMM17A	-1.60922e+16	6.88277e+16	509604013742884	2.39805e+16	1.29509e+16
PLPPR3	-2.00258e+16	7440492833113047	1.37711e+16	2.06485e+16	2494993910764448
SERP1	4907763665422173	7666758666368695	1.06527e+16	3020172321474449	6442811741176322
SNORA70-32	1.53818e+16	8840876493624481	2.06313e+16	6496730853182853	8856775841769327
ENSSSCG00000037479	-894798251361832	7776541849548275	2.69435e+16	8696171696054501	963543775806624
GSN	-3.78189e+16	1.1373e+16	1.39445e+16	3.52093e-17	1.06802e-13
DYNLRB1	-4.6633e+16	863739650935839	2.04785e+16	8862088475560743	965216973921262
PNISR	1.47068e+16	8910569391544868	1904121652147861	6625737972024539	8866269942840048
AP3S1	1.42394e+16	7405892778242468	5312709549046094	2.11704e+16	1.1747e+16
PSMB3	-5591464545845416	7095045865692118	1.18309e+16	2767286291991244	6203514789545858
ARID3A	-1.24867e+16	7287840034631748	575853459327482	1640875151976656	9602903591358348
ENSSSCG00000037645	-2.26067e+16	7013678743400699	1685725333440963	4.0299e+11	6215612124440936
RAB5A	-8659870450467622	8025521134246304	4043542330507652	4.43407e+16	2.04304e+16
ANAPC16	6064597005559246	8382945960837763	2.83657e+16	866251967690246	963543775806624
SINHCAF	-1.53054e+16	7498686103046018	6868033020763553	877511842936813	6214286202898831
ATP5PB	1.21891e+16	9340995282373768	1.51708e+16	6969083516079212	9055917535551354
MARCKS	-8584113222668768	9787163483220656	9692297908106262	7555539013270306	927071131244526
NDUFA5	-4671779989480526	7678924463062538	7331647197182056	3.91859e+16	7222842954431126
KCNAB3	3385198699873511	713211275647828	3523476461004891	5527871836531546	836187625353733
RBM14	-5.75402e+16	8497069736852891	2.89507e+16	8648928944488805	963543775806624
CPSF6	-2.10443e+16	7363521947072976	1.50521e+16	698038066028732	9055917535551354
SBK1	-3.64377e+16	6986054478895557	4.23865e+16	5150146343969293	8101353799502259
ECHS1	4.2819e+16	8956539404561903	1746348765780406	1.86336e+16	4.93477e+16
ENSSSCG00000038144	1.46768e+16	7251172671978825	6937974776441439	8438460211298083	6022744150808828
TMED7	7380403757370548	754340794260079	1.54202e+16	2143170653648324	5450042623488277
EDF1	-1.21063e+16	7744963062006823	6037378765528145	805906126364587	9369670386487968
ZNF326	7475154250010521	7161350539816937	2.01444e+16	1558090121127079	4417015608179569
ENSSSCG00000038304	-3969533476402649	7965687188882368	1.00173e+16	9202756087375692	977759257386092
POLE4	9458479642010958	8469462601112047	6503486182261264	7987081647708139	9326795317256922
RANBP1	2744172107254671	861024037596606	6264311493761305	428667421607179	7517155586826595
PIGK	469023075879111	7011638868037262	5.84317e+16	9390685703817012	982174791481784
NME1	8741781029589237	7475031814050484	2460931343935413	1.1671e+16	3.76616e+16
ENSSSCG00000038359	7178668571914705	7.90805e+16	2.56947e+16	1.08945e+16	3.60672e+16
ENSSSCG00000038364	-3881996968697964	8086828716026348	1.00448e+16	3.1623e+16	6555697189494661
UQCC3	7569690043104547	7260810338192305	1615073555953329	2037800804322459	5243944274781231
COX4I2	-1.29695e+16	7312172663685327	2.70145e+16	1002568812639028	3436299885128118
PTK2	-709708723949071	6962587851416361	1.5284e+16	2.16353e+16	545838057088843
ATP5PF	1.1389e+16	943947384141101	1.44788e+16	7035665394267845	9055917535551354
STMN3	2.15661e+16	7393959865200194	1.35758e+16	7125355675688128	9094072461256936
PERP	-8788887923169807	7429468647154787	2.94838e+16	859634484141483	3.09809e+16
TMX1	-5459263904690764	7486727105984926	9333469782926722	333994722444033	6727352886215824
PAXX	-1.29209e+16	7840065957428777	7403967915637422	7855433363913746	9326085272226364
HYPK	-4.94189e+16	985576887327196	3.25967e+16	7100332977086855	2.76719e+16
ENY2	-4.20483e+16	8467703828474614	1.45696e+16	2274137837103607	5593149815579141
VAPA	5570788228723272	7.22703e+16	1074308821760741	2999742092593525	6442811741176322
AURKAIP1	5559584888840797	7258486143115698	5696431421366648	4504007570342248	7653869073784212
PFDN1	2763807044473387	7837880201996863	3885538095807363	9502967857024688	9862088342789
MSI2	5612445636032786	7878989887298164	1.49854e+16	2.20896e+16	5508235563982025
RPS29	4153026394753763	1.20745e+16	2609912023743277	9871105583528592	9975242732938388
DDAH2	-7494583281622534	8006175247039225	3.90796e+16	4805788657529996	2.14896e+16
FAM162B	-1.8063e+16	8637395530863845	2891673469542567	7.55573e+07	2.25433e+09
ZFP36L2	1865247527550894	7554114561394307	861223793934181	3339117695402705	2.83981e+16
SCOC	-5168956940868047	787941629022235	1.36144e+16	2.43288e+16	5831453213746444
RBIS	-6500979304459171	73418629639203	1.49829e+16	2209347231707076	5508235563982025
SKP1	2.08197e+16	942628793766234	5037191035263198	4.77871e+16	7862478081235228
FMC1	-4547471191007205	7146339006144961	7775309200709255	377897337462658	7105094567996256
ENSSSCG00000038702	-9534530706486106	7113343394982806	353424803942764	6011358624156041	2.49218e+16
TMEM223	4316165824311445	7867276835324286	7903288618957673	3740007034146585	7068341435251074
ADRM1	-2.36642e+16	6.94958e+16	1.50475e+16	6980816457247968	9055917535551354
BTF3L4	-6663324284845805	8387555791787108	3675880070495508	5520510219837849	2.36086e+16
PUF60	-7685985635311772	7955504220603632	2271413358076917	1.3178e+16	4.02414e+16
NDUFV2	-6309441730981661	8110948331501847	2635094033109067	1.04526e+16	3509909370135125
SMIM5	-4609700198960228	719608409148644	7084401594587675	9329221546982968	9809869159496380
CFAP61	-1.00844e+16	950412934344368	1.17081e+16	6222935229309856	647185263848225
TM2D1	2.26587e+16	7218410654524153	1.3288e+16	71546463149533	9123916685438964
RPL23	-2797029806631177	1.27927e+16	1.26851e+16	2.60047e+16	6006165787652123
DCTN6	-4303344810319955	7570768039895188	7129823002949988	3984555347828217	7296396130247959
DNAJC8	1584608580181	7383330569697838	5358804296607911	816933443843765	9422172799718962
SEC61B	-8726996789845173	102134550358612	1.1354e+16	7361493180358099	9220857956722568
ENSSSCG00000038947	2563087142850922	8921287770119113	5433906424649475	4.61031e+16	7733421905652456
UBE2B	-5243712544469658	8352208502353228	1.91404e+16	1.66515e+16	4.61977e+16
CAMLG	-3534666818584463	702096812829393	4215064616830575	5161863047835185	8103017655475401
KRT7	-3495622551616402	7002137860860026	3543170120096245	2.64152e+06	9.81137e+06
PPP1R12A	1.49139e+16	7.61474e+16	7974441555016587	7776440700175173	9305142718158328
CRK	-2845871861742014	9848393607526852	1.04944e+16	3.05636e+16	6453104643430253
CLIC4	3.77535e+16	7258652585107023	3.22531e+10	9954686967552946	9998942974100888
LSM2	2854031669342104	7267881109100037	3016486643104076	5828506976813229	848008326500817
RPL36A-HNRNPH2	-9418110069004972	1.09457e+16	1.29261e+16	7191994070037195	9142416649164116
ENSSSCG00000039071	281859810431165	8051119815646114	4.54922e+16	5000067906508947	8031883133138821
RPL6	-3.85219e+16	1.2666e+16	1.68891e+16	1937450198019083	5051804241253196
SMARCE1	-4.34705e+16	811872925787317	1.36173e+16	2.43238e+16	5831453213746444
MEIS1	1.59032e+16	8231864797372365	1.64927e+16	4.88388e+10	7285795312764342
RAB25	-1.2521e+16	7563614011351963	5014570612251168	2513486220409303	1.35094e+16
CBX5	-1.14757e+16	7989094659169708	8223619682469474	7742895513640597	9293438044979946
POLR2I	-5486503476358999	7695872608128623	9998823873751612	3173389683486152	6555697189494661
TGIF2-RAB5IF	2663200779248259	7669929206076329	3065066804027679	5798317791425868	8469452953768121
ENSSSCG00000039222	-6186698474693156	9469070743618074	4404088006769822	3585289008022975	1.72248e+16
POLR2D	-3.5364e+16	7625108501576184	3.30186e+16	5655498093670721	8406075767152044
PSMC4	-4561745437387141	7.23127e+16	7961113407444413	3.72259e+16	7056945532647751
CD81	-8130507940634991	8270623238400248	519561739025859	2264391024124706	1.2376e+16
COX6A1	-1.63552e+16	9413774725022066	3206466910079375	5712192663187442	8406075767152044
ATP6V0B	9565926481739148	7630510111320201	3.54933e+16	5.95693e+16	2.47868e+16
ENSSSCG00000039273	-1.42641e+16	9163289761136992	2117098902145857	6454304980468882	8827709229452704
H2AJ	1.76597e+16	7309903550690517	6662113367721867	7963214735702413	9326287528300124
YIPF5	1.23009e+16	7551663978562796	5601740310066372	8129050834939312	9406043533657484
RFX6	-2338568857246213	7453288398527651	1311761433464478	2.92532e+16	3.39669e+16
H1-0	3.44469e+16	8009491602342342	7565268111298975	384417638539153	7190545756847466
MCRIP1	-1.36951e+16	7606565245580705	7454987493586351	7848238285147079	9326085272226364
ENSSSCG00000039460	-2394413565859747	1.19931e+16	7998115605147404	9287384464947356	9789667127818676
SERPINH1	5848860163887947	7543675079325568	6348015567681804	4.256e+16	7510419059821185
NDUFC2	2673373841634157	8578216820345311	5631276559702827	4.53003e+16	7662315023078186
ENSSSCG00000039506	1.01307e+16	1.04638e+16	1.57581e+16	6913937129362053	9055917535551354
ID3	1.84867e+16	8546947899929084	2.02429e+16	6.82045e+08	1.30787e+16
ENSSSCG00000039544	-2696392857072676	1.21185e+16	9351876526584806	3335185349526375	6727352886215824
ENSSSCG00000039582	224745561823174	9058259260098552	5123519122910185	4.74122e+16	7858658738173757
SSBP3	5466961921780718	7569152725837403	6.81912e+10	9934113087695768	9998942974100888
ENSSSCG00000039612	-3262907073968012	7671934610062437	4.63928e+16	4957939429440863	7985353771311832
PIN1	-6337279346108805	8083433623993415	2276921163790051	1.31312e+16	4.02414e+16
ENSSSCG00000039635	3.82989e+16	6875987456382321	3640806325389434	95188556574293	9862088342789
EIF3F	1.65084e+16	70598591745734	9897173892459642	7530670942197808	9266951396078440
FAU	-2860881086613676	861982117308055	6974949953020788	4036266944326441	7365014730905977
CHGB	-7464879436837706	1.18201e+16	2756678081268717	9684915105295402	3.35744e+16
STOML2	-5374900848150009	7231465072795428	1.10825e+16	2924624692574114	6376325088678152
SLC6A11	-1.99937e+16	6795291743198699	7394636871885321	6.54186e+16	4981669730567437
DCXR	-1.56372e+16	6801730237360838	4.65879e+16	8291106816369629	9496421904211908
PTP4A2	2556012753754266	7885770159458056	6.74107e+07	9993449049389844	9998942974100888
MARCHF5	-1.25809e+16	7140410035310267	5782579483858454	1618577084780139	9537347512052596
PNRC1	-2.3873e+16	7.3168e+16	1950612193040604	6587371732610788	8856775841769327
HSPB1	1165026600650476	8562359569359334	1.201e+16	7289260957952182	9206135810882212
ENSSSCG00000039963	8404170288433317	6802956989439832	1.51116e+16	2.18961e+16	5484109682634171
TMEM147	359785745020304	8049130938189283	7726665999997695	3793933803682441	7118514971857776
NKX2-2	-245645250213068	8381990400486353	4328936649325659	47214.2	2.09585e+06
APEX1	6340159951862535	6871833260172729	6636865487548778	4.15261e+16	7423072253493692
ENSSSCG00000040118	-9367635261306966	1.01097e+16	9644174148627828	1.89953e+16	1754896485190973
AP3D1	1.22605e+16	6658577626335985	1271359372556304	2595118173815308	6001416869560178
FLRT2	-2214800860989425	894855095301466	3833134631266587	596960	2.31163e+08
C12orf57	3.91272e+16	8929982447876919	1.28264e+16	9098295656803598	9713902439039500
ENSSSCG00000040203	-1298908203029265	9011741058048716	8194445381503984	4.20188e+16	34447875853134
RPL35A	-2809624797474693	1.2186e+16	1.2057e+16	2721859955807182	6153770334868411
COX7C	-8481921552599578	8973568029125522	6618286755946379	796977828856556	9326795317256922
SSNA1	162014559394923	7055982822885798	9527232307582344	9753762335720574	9950587136217178
TMED5	1.6702e+16	7422760136503117	9174862846015048	2.45362e+16	2210685111995386
CDKN1C	-1.12817e+16	697927435328211	3.69444e+16	5459408955768825	2.34897e+16
RPS20	-4.71852e+16	1.3391e+16	3823299552368116	5.05446e+16	2.22739e+16
PDLIM7	990175532017545	7439412183623919	2.44906e+16	1.17595e+16	3774656342287092
ISYNA1	1756850803342924	7274144147742228	965613083458415	1.88721e+16	1.75241e+16
C11orf58	4029985162659121	8777061858616886	1430012685460658	2.31762e+16	5639137836391828
AKR1B1	-2.06209e+16	7209299125366356	1.64098e+16	6854108509145436	9019868030834920
STRN3	-4.36748e+16	7402553776990317	6.55172e+16	935487508119456	9813183082290546
REX1BD	8848987722792624	7431805996799441	2.69426e+16	1007100129693611	3.43888e+16
TYMS	2503753369803383	7209507379646092	2.23063e+16	6367159596889305	8804270427586566
DBN1	-1.66435e+16	8160590609315756	1.77492e+16	2.52021e+11	4023496905336006
SURF4	-2232995388929245	7315366985672188	1.77371e+16	6736423142321388	8920433084394523
DYNC1H1	1.17333e+16	6948042989271261	4.07547e+16	8400121427436718	953130984908655
ENSSSCG00000040769	-2.40361e+16	7.19899e+16	1.79303e+16	6719732815201929	8920433084394523
CRYBA2	2.46144e+16	8293160058576124	2.32819e+16	1.39912e+09	3.03143e+11
MRPS21	920224566236294	7800011783044004	3365060758445981	8544519930935937	9605328149662388
CTSD	1.95098e+16	719100997904139	1.23629e+16	9719513844027832	9937929885466660
NOL7	-2.83847e+16	7783361201019658	1.94856e+16	658905191744817	8856775841769327
ENSSSCG00000040854	1.917e+16	7593836172593729	1.5265e+16	6960155989915663	9055917535551354
ENSSSCG00000040857	5650880460746721	8370087984418092	2440549361022233	1.18235e+16	378185161418939
CNBP	6231530445636152	8544285296925558	2.9732e+16	8465411576770689	3079411248969425
LAMTOR5	394201523381962	7196662842417979	5587342370219955	4547706876962526	7665270173921581
SNX6	1.96449e+16	7835389336744895	2.03062e+16	9640575640855564	9906925260182964
TPT1	-1996626858560031	1.18313e+16	4.32908e+16	5105654145000111	8079734895378387
CSTF3	-17517802316526	7505384591992375	9979748462654848	75207279586069	9260977594495640
ENSSSCG00000041063	-1.27222e+16	7073969994587186	6548143899629825	1.04994e+16	6923493151196607
ENSSSCG00000041220	-3831060401754898	8793369736177715	1.12422e+16	2.89011e+16	6375758032260185
MED21	3189726363283911	8707018786345218	885464721605866	3467092917554711	6843936127927955
ENSSSCG00000042272	-3.73216e+16	7474130013549455	509683153495879	4.75276e+16	7858658738173757
APOBEC2	-2.16943e+16	7318824800862739	1.37664e+16	2.07002e+16	2494993910764448
ENSSSCG00000042464	-2.53224e+16	7363345051997525	1.53162e+16	9.09345e+10	1.23508e+16
HNRNPA0	-4.82608e+16	9316370509842322	2715216664700808	993954740208893	3419655249868025
ENSSSCG00000042973	130491000199224	7782311995507241	7920668133226283	7783753837549306	9307773971313888
ENSSSCG00000044115	-4.47047e+16	9100247708246782	1.8833e+16	1.69959e+16	467436448662722
ENSSSCG00000044572	-9424010065429826	7385196137509824	2.79687e+16	9444857983396572	3.31207e+16
ENSSSCG00000044599	-7827824440517748	8112074345934598	2354633134423982	1.24911e+16	3.94121e+16
ENSSSCG00000045321	1.72269e+16	1.07529e+16	2.51188e+16	9600278075434426	99038685165535
ENSSSCG00000045485	1.42088e+16	942290848703379	2.40159e+16	6240911698963598	8758036660883999
ENSSSCG00000045739	-1126953710862918	7.96668e+16	7405070065410047	7855277651388749	9326085272226364
UFM1	7419223258969913	80887736866627	2682824260790432	1.01436e+16	3.45071e+16
ENSSSCG00000045989	8816859796271863	7.15113e+16	2098449462099168	1474485976513059	4.29362e+16
PSMD2	-1.03896e+16	884224590687101	8299830708645114	3964877424749395	3310127024332064
GNG10	5650433689351629	8565174947327764	2.65046e+16	1035198210193465	3495474475977934
ENSSSCG00000046598	-1.21203e+16	6798244727394041	3085097503012688	7901252939465842	2928774002001595
ENSSSCG00000046891	-6004590232899549	733180163906291	1.29542e+16	255051878348851	5955636456420966
ATP5MG	-1.83812e+16	1.05158e+16	361278785634056	9520708361692458	9862088342789
CPNE1	9611943336160966	774452357405233	2.77144e+16	95960074462558	3.33296e+16
ENSSSCG00000047961	-1595665758106018	7253199760213123	890049328886182	2.85094e+16	2518788367166613
ENSSSCG00000048263	-1.62123e+16	7.97449e+16	1.55966e+16	7.83955e+10	1.07278e+16
RALA	-1.29672e+16	6972293023662909	5364052815406889	2.05559e+16	1.15469e+16
ENSSSCG00000048661	-7369188235170757	804335417976705	3.76486e+16	5234017230257692	2.28439e+16
SELENOK	4.24729e+16	808175430964269	1128637342026284	9153940417620360	9747243963113068
ENSSSCG00000048856	-2.35203e+16	1.49371e+16	8171883722610573	9279705709667328	9789667127818676
ENSSSCG00000049283	1.68024e+16	7159503974189454	8159766215776106	4282989191586276	3495533779680279
ENSSSCG00000049534	-2536086362131331	9608935321664252	5343784676633588	266.905	142873
ENSSSCG00000049656	8208997126404335	6739077276929564	8511178337677894	9264946082385136	9783434065344424
ENSSSCG00000049691	-2.27087e+16	7723659051678708	1971641787866575	8.98263e+09	1.65135e+16
ENSSSCG00000049877	-6529560998110783	6.81551e+16	9620140773648272	3266799535962298	6670080960464299
ENSSSCG00000049882	1336126495569006	6850736099598725	3680842607733936	9846931071164736	9975242732938388
ENSSSCG00000049934	-2.02074e+16	702630156166848	1.23683e+16	4366780603032943	4759006405700573
ENSSSCG00000050251	6189825327030976	6596656569860404	4.19469e+16	5172019845382996	8103017655475401
ENSSSCG00000050320	4551125360410113	7594212792072593	8335652931653224	3612436092083036	6990461358329013
ENSSSCG00000050649	-7813899127144893	9766125929191596	7402656826723931	6.51276e+16	4980347278827555
ENSSSCG00000050687	6392461239597774	7205158535332312	1.25012e+16	2635304705172145	6063532949953608
ENSSSCG00000051070	6749373864294754	1010622681717445	5978282997421881	1.44831e+16	8845380372380146

## Sheet: Sheet2
Sheet2: Differentially expressed TFs of the 1°NGN3 comparing to the rest of progenitors
Gene name	logFC	logCPM	LR	PValue	padj
ATF4	-13457037088396	7713999413465719	3.81289e+09	9984420010589776	9998942974100888
NFE2	-4756526894111088	785850816532216	1043868704087811	3069234175713363	6461551842970001
MBD6	3484135911675952	7326327937654615	425028616657218	5144384677867802	8099290755812629
SOX5	1.54202e+16	7309442443494488	6358305735921963	116833054936144	75941485708494
FOXP4	-1067515500053576	6882473395053581	296764900962665	8632263242467128	963543775806624
CDC5L	1.0046e+16	7373999786873434	2523351411762759	1121719582873288	3665371407342474
NR2F2	3.57707e+16	8303538737445743	5388422039442242	2126.59	117285
FOXN3	-1131661096758488	717369244339491	424247480892676	8368122458939782	9516836341199512
SIM1	-2676703924691362	8180587627561291	4.23656e+16	75711.6	3.28084e+06
HMGN3	3651377055989229	9180099697110636	1288758638638682	2562768438142817	5964499434040827
SETBP1	-1.29131e+16	7838537955517089	871371159637728	31582554237191	272418240339759
TCF4	1568089005730382	8288024873685286	1.58651e+16	6.80201e+10	9671613587951
RORA	8905498326017353	9097211552215128	5465136491885188	193995387961888	1096495671088933
TCF12	6034597949884424	8845782240393248	3.19561e+16	738361821809631	2817229592648909
MEIS2	3.12924e+16	7398798826870573	2151006332409618	3.51977e+09	7.19773e+10
NFIB	856224727453921	7315036458187596	4404084800875679	321594	1.46325e+06
RFX3	-8844778103176406	9056516997926704	7308434534002753	68631691249542	509835420710883
TRPS1	8830394317798584	7.57665e+16	8922322160671321	3448731146078516	6838373716469992
MTERF3	4296853871944829	7914635420659373	8096321957568575	3682290144682584	7046364691801534
PBX1	4189944094166655	8971266228973107	8876206275388779	4.45274e-06	0.000623383
MTF2	-2020126279341178	824938894336804	2996646242595306	5840927476384993	848008326500817
ADNP	1397599976939096	7108978003483808	627086730011793	122739050144142	791211148241146
CUX1	4269827106813321	7546226455800838	7006884957081293	4025524463875403	7356205558357897
GTF2I	229075271378296	7786966321931027	2540264265953567	6142541082690899	8693865727011556
CLOCK	-262334688604836	6812663986142899	15163043789603	968938422122881	991826731306886
TSC22D1	473275163947274	7648517662615333	892041926802796	3449245643801897	6838373716469992
DACH1	-1676763552024034	9349137672166072	2878502603743094	5916014387365042	8538630439499427
KDM5B	-5534383241972199	7577878112116109	1233933998416958	2666433310265392	6095060022404163
ZEB1	1.26557e+16	7805528890239894	655067241500271	104844528584657	69234931511966
SKIL	1.23031e+16	6795985282051353	2926547522854753	871336448974593	3134056002240632
BBX	1.50457e+16	7595212668454313	6215545697312113	126633312893574	805848354777294
DRAP1	9327286301592782	735190286213385	2.8954e+16	888327288870547	3176337260794491
PAX6	625444867868008	82689354668097	171252303770028	8958833654326706	968810294169614
TEAD1	-3581500171637979	7719550145859372	5141016981890254	4733686328489133	7858658738173757
SAFB	6556890635687951	7208084543815426	1.4786e+16	2239938666021332	5540217513322089
NR2F1	7531139919655282	6833801283344942	2.37444e+16	1.10016e+09	2.44181e+10
CREBZF	-2239686996085839	7315238474119699	1460859517910815	7023041809612237	9055917535551354
PROX1	-2.20488e+16	7950883541994663	256905466844273	4.00785e+09	9.99219e+09
BAZ2B	-8901671633761464	7425251335593355	2545521791360227	1106073645755913	3633671543819066
NEUROD1	-1.37295e+16	8184025050911941	1.13668e+16	7476799837302	75737690556876
STAT1	861080377996771	7304070024788355	1.76036e+16	1845800483189235	4911340466965509
HES6	-3.36995e+16	8556569325641656	6940356535794048	0.0802435	6.95444
ISL1	1.36138e+16	813283049274444	8848925911414195	29326141776096	25784337213766
GPBP1	-4870751483541685	7658787564438655	1054492596822135	3044746655995934	6451034824112456
NME2	4700293858056261	9405630798910964	2.57483e+16	1085754701092201	3606716800694717
CAMTA2	8263565988782817	7331550851233112	198196916743363	159183112705918	4463994840135142
TP53	-1346531847329301	6813331438521523	3682875929636862	549739502659759	23597308840584
RBPJ	-881846412960415	7248573913633573	290533548710729	8646559016004189	963543775806624
NFIA	4.95347e+16	8731995342139314	958123982496004	1.26302e-06	0.000208973
SON	-5383564307308967	926053961899819	2.97102e+16	847684085567957	3079411248969425
PHF21A	1591872487191156	7371810301443412	8544597804435696	34654916355028	293357896586749
ETV1	1.07411e+16	6981569587720977	3198503160476078	737057000143221	2817229592648909
CXXC4	-472912262018258	8041517711087675	1.21812e+16	2697301236436862	6131081737976604
ZBTB20	7181243335358672	7981243359954957	2.99571e+16	834853697455773	3044957373485986
FOXP1	1.79816e+16	881185070468309	2587135978336251	3.64944e+08	9.3549e+09
GPBP1L1	111530481552903	6829653595704298	2180002107134	9882197979597988	9975374555112776
YBX1	1610021927185025	1050742067037215	3928820125013812	5307883706633161	8193679682843386
ZBTB16	1613578379504107	6804151146489305	531805737381503	8176184691828409	9422439583329674
ARID2	-2606988717679773	681642676861751	1437911995090932	7045407619269357	9055917535551354
XBP1	-1.45817e+16	867359144326874	1935350134095085	1.0862e+11	1938119795285
ZKSCAN1	-3657039393323464	7087646131077295	5054551639239651	4771129273008666	7862478081235228
CGGBP1	1002760953782671	7751300807478907	422965976929377	8370554384173157	9516836341199512
BPTF	1.52652e+16	7202270818392039	7523208031587113	60909113132182	46972282161259
NEUROG3	-5.22942e+16	1.05864e+16	1905074672207224	2.46356e-29	2.24184e-24
HBP1	4527465908054098	6746754363405405	2571502552985127	6120847620394386	8689502862026351
PDX1	-1927465079543761	8045766590192189	2239461399931519	6360494682399185	8804270427586566
CAMTA1	2457356136179974	7914199292133385	3189160750533539	5722597733791969	8406075767152044
MAX	-3963551493280488	7367572701721074	4728560509786148	4916761775191381	7962016129409575
ARID3A	-1.24867e+16	7287840034631748	575853459327482	164087515197665	960290359135834
MEIS1	1.59032e+16	8231864797372365	1.64927e+16	4.88388e+10	7285795312764
RFX6	-2338568857246213	7453288398527651	1311761433464478	2925323060523	33966876187246
PIN1	-6337279346108805	8083433623993415	2276921163790051	1313123178103975	402414442936767
NKX2-2	-245645250213068	8381990400486353	4328936649325659	472142	2.09585e+06

## Sheet: Sheet3
Sheet3: Differentially expressed genes of the 2°NGN3 comparing to the rest of progenitors
Gene name	logFC	logCPM	LR	PValue	padj
GTSE1	690250302441237	4585733277083973	1387061352767354	5.10694e-17	1.35874e-16
CDPF1	-4.88883e+16	5744267234526641	4852826730997194	2.76009e+16	5235998309033371
FBLN1	2.04213e+16	5381139653725771	6951378667052359	0.0758822	0.00906065
KIAA0930	-750826551664411	6013996704111064	9676320164580034	1866581003617882	4793158748577437
NUP50	-3.87073e+16	6879594612974249	7531710847632144	6062231123504425	1.37694e+16
RTL6	4173923498200665	5762785577146133	3099238480495286	7832892635996017	1.2855e+16
SULT4A1	2.80102e+16	3736031658237657	2.30842e+16	1.55058e+10	6.83789e+09
TSPO	1.0847e+16	5302940860118723	1979327368243181	8.62858e+08	3.42367e+11
TTLL12	2.21968e+16	53047329684706	7145185970970029	3.97948e+16	4.94504e+16
TTLL1	-8814353742803855	6093799486081513	1.89172e+16	1.36513e+11	5.26351e+10
PACSIN2	6060603095834332	465468326425125	2.44283e+16	1.18063e+16	1.82151e+16
ARFGAP3	-3.984e+16	6003192311675358	4939380202449241	2.62514e+16	5.02161e+16
POLDIP3	1.03311e+16	5.56278e+16	1.54009e+16	6947333693103624	7633019814972659
NDUFA6	-4342793354491905	7877972063595634	1.3637e+16	7119165303223182	7779983699516021
NAGA	4.96189e+16	5448590819355287	5549983354110804	1.84809e+16	3704260447933905
SNU13	-2321600972293305	821803323254102	3973920632032133	4621006053774442	8182792271969545
XRCC6	1.2566e+16	5924788142760817	4834594153774852	9445667622138140	9612527722550106
PMM1	2.89283e+16	5389426741331738	1.74539e+16	1.86458e+16	2.66689e+16
ACO2	-1.37757e+16	6755852100448468	9372970917077340	9228740224259386	946794917087219
L3MBTL2	949800618612621	5166580192996995	1.34091e+16	7142271498516635	7792452756251261
EP300	2090885042172258	547169047393605	1014913349877978	3.13729e+16	4083694540345178
ST13	-3185897379467178	884668775397256	6924407355395175	8502716485771672	1.86391e+16
SLC25A17	7305656334792464	597227603718262	9679310403889474	9751805465580816	9820728230768684
SGSM3	-6862098379805998	5219500609137064	7245368428525418	7108412739948941	1.58868e+16
ADSL	-3149993622722183	5451102200528454	1.79565e+16	1802390949986225	2592984243058487
TNRC6B	-2.58045e+16	7506763067901287	3.98636e+16	4587002401673395	8124823038544145
ATF4	-2384975288272099	7994016645625769	3.28646e+16	6985335214433178	1165798266396292
TAB1	-3338446173015336	5412062876949689	2055961909320553	1.51611e+16	2.24407e+16
DNAL4	-4.95867e+16	5614241556790865	3.92222e+16	4765197628747205	8403313310100957
SUN2	1.04792e+16	6024953048297989	2.44536e+16	7.61217e+08	3.51398e+09
ENSSSCG00000000097	-6487943769677064	7457150805081246	2.66868e+16	2.39251e+08	1.18097e+10
DDX17	-426219867480153	8737601601981842	1.44776e+16	1.41834e+16	4565459692931291
KDELR3	-5114921499633415	877594498304181	2.34176e+16	1.30377e+10	5.80542e+09
ENSSSCG00000000107	-1.38135e+16	591477465664926	2.90665e+16	6.99367e+06	3.66368e+08
PICK1	-2.45227e+16	5313562685356303	8331946403931152	3.6135e+16	4582061468054367
POLR2F	1.03164e+16	8097160117017358	7303959143256069	392754887352797	4897596922804618
EIF3L	-4923240000338361	7827751716905219	1.55852e+16	7.88687e+08	2.67569e+16
ANKRD54	1.47985e+16	5239082102389131	2.87556e+16	5917911901462339	6721993111103015
TST	1.63503e+16	6068295897022745	7365596593006103	3.90765e+16	4880378468907015
KCTD17	7024246129008481	4964176965780015	7842694034062537	5102650549983272	1.18031e+16
IFT27	6477151177992813	6730897304255884	1074354837949453	1.04643e+16	2.8395e+16
EIF3D	-4.99127e+16	7.10131e+16	103324301158089	1307129929008436	3.46335e+16
RBFOX2	-5065112880131387	6641936687861883	8813422663527673	2.99023e+16	7315272260400565
RTCB	-713960318140097	6297416722803475	1.77223e+16	2.55609e+11	9.39774e+10
PRDM4	4.28668e+16	5300877826321418	2.43051e+16	1.18994e+16	1.83279e+16
PWP1	2.72712e+16	6277089580533712	3.1948e+16	7387258867119663	1223956171988922
CKAP4	-1.20698e+16	5477395292498558	1.99192e+16	8.07867e+09	3.22142e+10
ADCY6	1.45894e+16	4999713203749353	195325442004588	65852077087715	7324258773398588
DDX23	3.18772e+16	5363412781437658	2.10725e+16	1.46602e+16	2182017823194385
TUBA1B	3.46683e+16	1.2021e+16	7509786022401574	6136466133388657	1.39183e+16
ENSSSCG00000000194	1.3757e+16	4909947970671808	1.7983e+16	2.22881e+11	8.26555e+10
MCRS1	-6618610459902536	5438521564256665	8210087838418744	4165813441271531	9842002868619400
GPD1	8670828092681344	7776641506240463	646536045463597	0.0892928	0.980386
SMARCD1	-1.36693e+16	5974715356748282	3.15659e+16	1.9279e+08	1.07774e+08
RACGAP1	3694124634584594	5328869279012381	2.56868e+16	8.266e-43	5.521e-41
ACVR1B	-5485951951316707	4773167133803626	1876778689398151	8910342947224686	9238861412937368
TAMALIN	-3.3946e+16	739424184920475	2368188944225999	1.94244e-37	1.13227e-35
KRT8	-1.64255e+16	1005151725100186	2.16886e+16	4.32152e-33	2.21677e-31
KRT18	-1.594e+16	903457014690901	1.67684e+16	2.37112e-23	8.39979e-22
ESPL1	4724577292735794	4337424359615427	7440429221599098	0.00636505	0.0803399
MYG1	-2.27124e+16	4731441411635349	5481932759981198	4.59057e+16	5529724961500202
AAAS	9013229448279184	5181624222473737	1.15505e+16	6773269135921556	1.91745e+16
PRR13	-7007412852647785	6235358150872721	1.48844e+16	1143030854328647	3752746460806597
PCBP2	1.62521e+16	8510983524523374	2.01124e+16	1.56137e+16	2.29833e+16
MAP3K12	-5307991341645019	4708039697044277	1.08165e+16	2983280209106897	3915021019401029
TARBP2	-9408857691431844	5191652171203746	1.27151e+16	3627160992790326	1082744706041507
ENSSSCG00000000278	-8791103893108563	5595827616312221	1.58017e+16	7.03392e+10	2.40541e+16
HNRNPA1	-8726830928671997	950168919505626	8475446112074533	0.000337816	0.000509665
NFE2	-1233955403703689	7257530485013895	4214727510473058	84651.8	609874
COPZ1	9593550491609680	6.72696e+16	331947746662296	5645144288669957	6491510971834965
PPP1R1A	1135620391663413	6632477178436835	2062607148205251	5.58306e+10	2.27293e+11
BLOC1S1	-6151880912788952	8447597011128693	2.48565e+16	6.17604e+08	2.88215e+09
CD63	2.66227e+16	9279470754709796	5294859818390588	2.13885e+16	4198137362164593
ORMDL2	-5159568743415923	7.16717e+16	1.1384e+16	7408114220878266	2.07972e+16
DNAJC14	-8942380725199607	6088501384876594	1427877153305417	705525224703527	7721160165214226
ENSSSCG00000000377	9118814278425748	7300054947751656	4.73847e+16	5833.54	474077
ESYT1	-1.2077e+16	5737716253086758	1.83671e+16	1.82174e+11	6.86595e+10
NABP2	-3564520204302571	6674909821380606	4412889923250582	3566836654003952	6536312267926077
ENSSSCG00000000394	-8378250549421349	8326421198057476	5545198226152955	9.57701	90.9745
TIMELESS	3737780528550952	5.02516e+16	1.94983e+16	2.59824e-29	1.11066e-27
BAZ2A	-4.75424e+16	6406331529754229	6557009291082105	104471803067923	2242628728729569
ATP5F1B	-3209000981372153	9582144541470904	1.04984e+16	1.19479e+16	3.19454e+16
PTGES3	4.72273e+16	656767846240199	5248839931626192	2.19614e+16	4295806763608888
MBD6	-2.19838e+16	6476108934264821	1.95649e+16	1.61889e+16	2.36724e+16
ARHGAP9	-6019215684821898	5.60737e+16	1.23595e+16	1.0333e-12	2.31663e-11
DCTN2	-1.07019e+16	7005570247471063	6212481042150504	4305838604912192	5257862718472096
DTX3	-166933443491858	3829523261749412	5194002448747961	2.2665e+16	4411891996537545
ATP23	7744822433645102	5087585540402345	1045523980922606	1.22302e+16	3.25665e+16
USP15	1798513520258876	6446964096144729	1108716164480228	9161412607953794	9422142502144364
MON2	4148381570033718	5118292296379784	1.47409e+16	2.24701e+16	3113782841896741
RXYLT1	-7580360579359041	5.65988e+16	1.10135e+16	9044848379758586	2504126416710365
ENSSSCG00000000473	6132002423597188	6267626448789296	1640025351726355	5.12784e+10	1.78791e+16
GRIP1	-2.37064e+16	5375779895397245	4621147303165465	4966373061056022	5874263801418781
MDM1	6916238964056883	4963945296682611	3.23412e+16	721192012021361	119800082411424
NUP107	9981138045271000	5516102028727089	2310419694547079	6307522979010923	7073074036624352
MDM2	1.24253e+16	5524174708342327	3368662739120154	5616436773600227	6471265515242526
ENSSSCG00000000500	2448500517896121	734603502646077	3.40629e+16	6494834563736389	1.09477e+16
CNOT2	-5218193498595791	6365566293051167	6554401486310727	1.04625e+16	2.24517e+16
ZFC3H1	-3758905289620851	5.40689e+16	2.65254e+16	1.03385e+16	1629151261605684
TMEM19	-6639056403663526	6390383350925127	1.02744e+16	1.34886e+16	3.56213e+16
TBC1D15	1.0171e+16	4999680122029066	1.11317e+16	7386499184121543	800578647203978
PHLDA1	-2.33749e+16	4784530087414495	2597922722263786	3.45111e+09	1.67134e+09
NAP1L1	4775931793075044	8655507548166225	1686941504417868	4.00416e+10	1.424e+16
PKP2	1.00746e+16	5193315065656296	1158237581850608	6657982314406992	1886477357489069
ENSSSCG00000000530	-6730038792151906	6807504267366415	1.72605e+16	3.25886e+11	1.1726e+16
IPO8	5039362783116464	4948776802815131	3125148431526142	7709285064922258	1.27009e+16
ERGIC2	1.29251e+16	6932570760436445	9375069545021688	3329198149289637	4.28737e+16
MRPS35	7019493131730498	5214914453278039	9342111770960316	7598721490976397	8184408012567553
FGFR1OP2	-1908115900319906	458715168030909	2257081275725028	6347246114761174	7108915648532514
RASSF8	342102887752099	4737734276472688	7259790719310999	3.9419e+16	4911667269716361
SOX5	-399548575074603	7721416079831476	6754795672748369	9349605241662984	2.03219e+16
C2CD5	1.18742e+16	5060727807066626	2.36033e+16	1.18382e+10	5.29704e+09
ENSSSCG00000000576	-1.35779e+16	5232971665610995	1.16158e+16	6539372874324101	1.85451e+16
GOLT1B	-9619344938280322	545501057592343	1.60159e+16	6.28139e+10	2.1619e+16
AEBP2	2.45025e+16	5040453622344319	9647456174752254	3259941120237839	4211715184961722
PLEKHA5	-64696647637454	605912715826692	1.1151e+16	8398663347743496	2.33227e+16
DERA	1.16399e+16	5480547949967196	2.8534e+16	9.20687e+07	4.77625e+08
EPS8	5748939458394201	4.58023e+16	1.47516e+16	2.24533e+16	3.11288e+16
ERP27	-3224640807260129	4992519632742063	8191399194659201	3.65432e+16	461886142627151
ENSSSCG00000000611	278775875597866	6336842721042271	26898754804633	1.00988e+16	1.59609e+16
ATF7IP	-821373924445575	6331111153331567	2.24867e+16	9621783532325136	9731052998307378
LRP6	1359284770934656	6054767283858301	6400697187392455	4.23686e+16	5195394454523989
MAGOHB	4333022017383357	6488629839211242	9490320743060548	2065587075043838	5247442284144648
GABARAPL1	-1919358826799875	5925415890079205	7511540295584354	3861111039851637	483072077805438
RIMKLB	-1.55753e+16	5357712367978759	343233357752041	5579687860105894	6438178614180132
CDCA3	6568522446499735	6057692122736565	5823667919056833	1.14619e-112	4.08299e-111
USP5	-2.6977e+16	5.79947e+16	1.81121e+16	1.78363e+16	2.57176e+16
TPI1	6229562077205671	8276677498165725	3742999764226602	540669691489704	6279250247839127
MLF2	2510455264228952	6878442651742465	2378417631211093	1230221024234274	1887575306865318
COPS7A	-7334099907676916	6113584380172874	1.57572e+16	9683359800852772	976607615564203
NCAPD2	4103177852940175	5078493920223401	1.89709e+16	3.68085e-28	1.49377e-25
GAPDH	266044631930079	1.05191e+16	6659913714315678	9860568990346984	2.13056e+16
ENSSSCG00000000697	-3213599577129724	7295088788114412	5897792497735516	1515987355316453	3.11655e+16
ACRBP	-1.13002e+16	5724398414325912	2.56391e+16	4.11614e+09	1.97107e+10
LTBR	3.17028e+16	5028281209036755	1.03553e+16	3088642188363931	4026097522217834
NDUFA9	-1.6388e+16	6606310992150793	1.14172e+16	2.8529e+16	3.78576e+16
C12orf4	8336404129507203	5054929208651994	1040239050875796	1.25852e+16	3342853531224798
RHNO1	3243156012017756	5470467515576114	1.4989e+16	1.83195e-19	5.46348e-18
FKBP4	6212203544096079	738626935181595	1.61578e+16	5.82794e+10	2.0134e+16
DDX11	1.53462e+16	4.49609e+16	1671377875809764	4.34642e+10	1.53212e+16
WASHC1	2351852892932858	5428413000173922	1.27972e+16	2.57951e+16	3.48941e+16
WNK1	2200869658160616	5.78804e+16	9913888268760864	3194031698279098	4.14075e+16
ERC1	-6948435995685179	5983774069868869	1.06421e+16	1.10544e+16	2979446832857495
IL17RA	-2.48011e+16	4443684320503646	2.30137e+16	1.60848e+10	7.07378e+10
CECR2	-1320763415447104	4825340572249099	1.34913e+16	2.39666e+16	7420286719835701
ATP6V1E1	-838349974680608	7961992311225258	5.52671e+16	105.217	99.8003
ENSSSCG00000000769	1280185939923851	6072567889250514	3658974149284754	1.45797e+07	9.19223e+06
KIF21A	-3593829819576946	6660404329880036	4.45828e+16	8327730035565791	8789696294328865
SLC2A13	2.04226e+16	4806020682998734	326745602919317	5675817080193464	6511764103767812
CNTN1	3227741374621925	6517765907986472	2.04787e+16	1.88512e-30	8.69598e-30
PDZRN4	-2.74831e+16	5242515044686067	5194561835558146	570.592	5074.39
PPHLN1	-4.15774e+16	5214630473846177	2.22058e+16	1361819343288917	2055068399427756
TWF1	8665881154775146	5669410767390045	1.89522e+16	6633150630683674	736735871192512
SCAF11	3.70122e+16	6265000495199597	4113706715620161	4253703636829058	7612265620806007
SLC38A2	9130002130556444	5446222460508914	1.36358e+16	2.21907e+16	6927314208203734
AMIGO2	-5136783604315225	6359829338982671	4047808441339612	4.42287e+16	7879816775169549
CHST11	-1533943658133094	462389603828972	1.51927e+16	6967006606207926	7646772742041291
WASHC4	-1.85757e+16	5529913763824915	6.47341e+10	9935804915099884	9951324760328092
APPL2	-4109176252328744	5598006654100493	3.13122e+16	7680609474590139	1.26602e+16
KANSL2	1.58441e+16	573836906238206	5958929477871484	4401493570864644	5351228057714087
TXNRD1	4486478740380855	5587466075353786	4787792711784844	2.86621e+16	5.4149e+16
NFYB	1258516081055835	5458408210563012	343601497895623	5577577094783901	643806018573436
TDG	-5390874878556109	5673980199270153	6201228785398033	1.27662e+16	26811874381332
HSP90B1	7751325372775684	887217130050802	6.36783e+16	1.46492	15.8667
NT5DC3	-1.15375e+16	5940048431201599	1823679438861843	1.95074e+11	7.31469e+10
NUP37	1148448339987164	5065339945215945	1662601805833824	4.55222e+10	1.60027e+16
CHPT1	2.67304e+16	5318301575975736	1036744456178523	3.0858e+16	4.02381e+16
ARL1	4947985655059605	6533181563996201	1.15059e+16	6937555394866189	1960493838337682
GAS2L3	4090255429751726	4102786702661314	770059176515593	0.0170446	0.0223956
SCYL2	-1160814869620301	5312448117158995	2.33813e+16	6287111436772053	7055238082698974
APAF1	-3136436740830751	500126174122301	1079979158591275	2.98702e+16	3.91833e+16
SLC25A3	-2514892506750501	932626898391347	9202089273278360	2417390660008344	6043005423771346
ENSSSCG00000000887	1500084712172282	4319599743767699	1.96424e+16	9.33718e+09	3.67978e+10
NEDD1	1.21395e+16	4914291203345173	180726140330367	2.12638e+11	7.91774e+10
LTA4H	-5351108517205267	5.0239e+16	2486989739439995	1.14791e+16	1780455961953817
SNRPF	3106701669338344	8207862668611725	6638397540279033	9980366815156548	2.15179e+16
VEZT	4.52491e+16	6115910447534814	5328356902783046	2.09812e+16	4138147426044404
NR2C1	-4485610405378029	4901459830655709	2454639157830238	1.17178e+16	1.81004e+16
ENSSSCG00000000905	4706735218519919	848047332274238	1.80087e+16	6712982782056617	7435353963737303
ENSSSCG00000000908	-3.49181e+16	8320591261588577	1.08324e+16	9973741623825634	2.7225e+16
DCN	3.46029e+16	463980009752473	1.00846e+16	1.49517e+16	3917878224357956
LUM	2.62652e+16	4.54084e+16	1.09018e+16	960705586787085	2.63926e+16
CEP290	8913975970909879	6246541176089998	2028750409741595	6.66344e+09	2.68211e+11
TMTC3	198907612444204	5156382721475687	7055598980391613	4.00922e+16	4.97332e+16
LRRIQ1	2710007122784239	5007176201552974	8408626787123711	4.73649e-05	7.01395e-05
METTL25	-3811241461808198	5.32356e+16	1689372181596278	193683750125155	275243839938496
CSRP2	3.1709e+16	4977479250104113	8617244629307747	0.000164909	0.000251762
DYRK2	-251069022921776	5998967605564268	1.56736e+16	2.10591e+16	2.95407e+16
LMF2	1.68124e+16	5126528129818225	4594652268942025	12152.5	95259.3
NCAPH2	2.23982e+16	5228464511646687	7453536050022225	0.00595618	0.0753275
PPP6R2	-1.01386e+16	5553105027715034	2.30283e+16	6313140234513068	7076897759387726
CRELD2	9196439037430792	5455728387685263	2.04796e+16	6.02709e+09	2.44284e+11
EXOC2	-493156856403313	5479591965235861	4523545175651019	3343148831834395	6174040987823197
GMDS	-1048744655468539	5790561499590634	2215239819619748	2.51841e+08	1.07869e+11
ECI2	-4.83327e+16	6547451614119332	6003516621908853	1427739244571215	2.9598e+16
PRPF4B	4659012365711839	6624731004884172	1.21822e+16	482465265584482	1.40617e+16
SLC22A23	-4.03432e+16	4973201679123931	2.00678e+16	1.56598e+16	2.30352e+16
BPHL	-1.62691e+16	7157594810642837	1.13161e+16	2.87433e+16	3805533028678912
WRNIP1	3646033708914533	5134660095756786	2103312184900922	1.4698e+16	2185111535150594
SSR1	1517087492712452	7159244620283894	124315163245911	2648645208022734	3.56938e+16
DSP	-3162269960284233	6029752525384765	1853874851912522	1.73333e+16	2.50997e+16
ENSSSCG00000001038	-7322197082003746	880661911907518	2041436608207519	6.23599e+10	2.52272e+11
C6orf52	-1.41817e+16	7.75209e+16	51022094434167	913.321	7924.51
PAK1IP1	-5894887934481139	5602712269711537	7472160776074611	6266030191171033	1.41528e+16
PHACTR1	7998278266870972	4949847109493699	4020268735961373	4495654955683835	7987292761386741
TBC1D7	-2.86267e+16	5951941038325383	2587841304851679	8721976120299105	9089325732257384
RANBP9	1.67167e+16	5.19661e+16	5018819961181862	478674354628926	5706004762745256
JARID2	-1.6839e+16	7329091880210445	1.24954e+16	5.20789e-14	1.17996e-11
MYLIP	1.12691e+16	5.5709e+16	2.69548e+16	2.08269e+09	1.03601e+10
ATXN1	1.67904e+16	6129034367065238	8646795247234073	0.00014202	0.00217335
DEK	1.72787e+16	8352470337377719	1.85555e+16	2.96853e-27	1.16774e-24
CDKAL1	-1816313879689384	5272770511626195	6058225677836759	9379596194226736	9575236023316804
DCDC2	-2.55801e+16	7254600631518383	1.9811e+16	1.59275e+16	2.33754e+16
TDP2	-1128550428287781	5.92064e+16	2.21449e+16	2.52824e+10	1.08218e+11
GMNN	1.56246e+16	6460122391929961	1.07198e+16	4.02769e-10	8.09578e-09
SCGN	-2.05344e+16	1.02709e+16	6293982130476863	4275761392288792	5232095810564071
H1-3	-3.05016e+16	7453391835722996	1.67387e+16	1957405874958009	2777359254310855
TRIM27	-7213538609579072	5873382734233865	1.31372e+16	2894879684793291	8813850208401986
ENSSSCG00000001229	2.45309e+16	6947450543851313	231777917320402	1.27903e+16	1.94986e+16
POLR1H	-4735249491513532	5695835013402262	5340630441009525	2083393715135916	4111640659110955
ENSSSCG00000001341	-1.14258e+16	6673311038070114	5503456204904769	118.429	11183.6
ABCF1	1.50785e+16	5342881268269498	4.56627e+16	4.99205e+16	5897015395191485
PPP1R10	-9302681187740900	5861495809783293	1960305156746429	65794415996899	732038513572994
MDC1	-4.96673e+16	490590949701596	2.01401e+16	1558531248637346	2.29467e+16
GNL1	751373447887531	5783343544218542	1.05159e+16	1.18355e+16	3.16864e+16
TUBB	6688251615553293	1.05123e+16	3438835643112826	4.51416e+06	2.72037e+06
DDR1	-3.16078e+16	6993833692499815	4774301224271362	2.88876e+16	5.44625e+16
TCF19	7642597061265309	5870585027282681	5196324653987986	5.08749e-100	1.30484e-97
ENSSSCG00000001396	-8167330075070349	5.15002e+16	7604317696900393	5822869419783967	1.32964e+16
ENSSSCG00000001398	-1.93454e+16	4936321522996409	4621494256793639	4.96621e+16	5874263801418781
DDX39B	-5492644211849621	7472192916586032	1.57357e+16	7.28372e+10	2484214943527368
NFKBIL1	2.49984e+16	5295723374997594	1.00277e+16	9202346312044528	9449943073803574
PRRC2A	2757746275567262	641665600154152	3134501068981457	7665183691377979	1.26412e+16
BAG6	-7560394941418564	6316568827126726	1.21693e+16	4.85834e+16	1.4147e+16
GPANK1	-4.56368e+16	5527330320052134	4569111076506706	3.25535e+16	6.03448e+16
ENSSSCG00000001414	-3264740756022112	7980864659781037	7983959426754694	7775149053793519	8329569519205563
NEU1	-6647115550230905	4891979116700745	4388195702001761	3618859125971892	660897884241862
EHMT2	-7584151877388465	5180292741904665	9384625351690978	7593432294579825	8181664908896965
NELFE	9201915901787088	6215012466511569	3654678859015713	1.49045e+07	9.37859e+06
EGFL8	-6648890607367572	6468521485250417	8276534616252206	4016070432457432	9533892489047408
AGPAT1	1.98012e+16	5824918288879379	8078394873889518	3687597787961535	4650841269946767
RNF5	-4.23235e+16	6739507438525413	4.60692e+16	3184325003522297	5925099223036845
BRD2	-4.98e+16	704143189980101	1307448473050581	7176610024434521	7827253525544166
SLC39A7	-2410842082687027	6147083609174595	1.19956e+16	9127865041451914	9399047799227504
HSD17B8	1.02633e+16	6304520016642823	4.93567e+16	2134.1	179108
RING1	2.28679e+16	5957298313026838	1.75546e+16	1.85192e+16	265470978208534
HMGCLL1	3039867577589236	4772503552424682	8916685005647537	3.62879e-06	5.75936e-05
PRIM2	2197361529655016	4986220227519756	5.30906e+16	3185.2	28725.1
DST	-1.60879e+16	5735681608542063	6669306965932371	4141237568806215	5101559133753208
RPS18	-1.14212e+16	1.13686e+16	1.10415e+16	2933569398970697	3864813434600392
PFDN6	2596845930638232	7692170449788958	4061028998475841	4388375059060682	782487788617828
ZBTB22	-2162053161865986	5584830788255023	9220274897594792	3.36943e+16	4.33049e+16
PHF1	3397400485027011	6153620431107571	2.57928e+16	4.85411e-42	3.34673e-41
CUTA	-1.4766e+16	7311114899910572	1.31036e+16	2.5233e+16	3430015650499899
LEMD2	5091486694628546	5037381936974628	3.87747e+16	4893816545900626	8587616774032515
GRM4	-893431163906933	5434754635457145	3834075126026306	5022069089215413	8776644044712245
ILRUN	7832260814360736	5392795534589342	6639214781568915	9975789435498092	2.15152e+16
SNRPC	-270687296582183	7529758540321283	3828938759262712	9843882510977160	988705743427092
TAF11	7335079866638849	6195921685358586	1.94392e+11	9964821473876656	9972597985093976
TCP11	-2380476944057325	5961934050121723	1.43663e+16	9045945960850136	9335775351838732
RPL10A	-3573842142439999	6356926787928659	4947061542224731	2.61351e+16	5003046205352958
FANCE	-6091702537445046	5373963144236017	5320714210793369	2107337239625432	4151227766659991
FKBP5	-9320149629422264	6311656007654763	2.49411e+16	6174901756866878	6953542336675522
CLPS	-310117522145315	8218407787803113	2.32828e+16	1270420913598879	1938124886508687
LHFPL5	2717858297236248	5144685974225681	1.29208e+16	255665534110789	3.46581e+16
SRPK1	33378188251633	6284419981602314	3.49353e+16	6160897052674493	1045070685231451
MAPK14	7315132523643663	5.33932e+16	1.14661e+16	7087661199629068	1.99851e+16
KCTD20	-487937459823327	5326122785805152	3682103922422055	5499940790467898	949276456217501
SRSF3	3495100782131453	9237440977889692	1.62983e+16	6864245797732673	7568967163381238
MTCH1	3655464020936959	8248271669644753	7.10808e+16	7.67373e+16	1.70138e+16
CMTR1	3952078220676795	5576585566513641	3.66597e+16	8481596271357391	8906528242027464
NFYA	-1.84257e+16	5471169599294126	4228122799766858	5155370965354189	6040979281771027
FOXP4	-8676588885710436	6164580339286394	2.29397e+16	1.67168e+09	7.32658e+09
GUCA1A	-2175997817471907	483293203014708	3.18354e+16	1.67808e+08	9.47171e+07
MRPS10	-3987861125119216	6135529568219512	5508980491288895	9812743972962736	9860415977846272
UBR2	-1.43209e+16	5876046865544326	39803334938685	5281066687821045	6162138264172731
CNPY3	887557270569497	5952830230976538	2.76588e+16	1.44714e+09	7.33524e+08
PPP2R5D	8750948280863958	5021442351098378	6337909325149861	1.18184e+16	251508947106855
MEA1	3.58249e+16	7266910865584459	7.78604e+16	5265146621128386	1.21396e+16
RRP36	1703397533646421	6091817587840761	7537380507124531	3852953163114642	4824279570765687
ENSSSCG00000001658	-2.55153e+16	5887620063899748	1.63107e+16	8983757688468372	9289094368956332
KLC4	-7387264154095899	5.41143e+16	7.57242e+16	5926826268412908	1350011013607942
PTK7	1595661779533203	503887549815008	3433471108584385	9532740334119062	9671508073160036
XPO5	5251051730956581	4980880693063648	4223093808338064	3987738770537976	7194536014825409
POLH	2.73606e+16	5128748129732576	9847569659286716	3.29038e-09	5.86054e-07
RSPH9	-3753426741332278	4926942696884374	1.56003e+16	2.11661e+16	2.96649e+16
MRPS18A	-60344585635838	6131240396119382	1.31308e+16	717080061490334	7822247965763902
VEGFA	1789573689744146	4747096845611103	4176069053776577	1.03157e+06	734934
ENSSSCG00000001696	2.04959e+16	782438809042032	2.33896e+16	1.26174e+16	1927170027793968
TMEM63B	-6050780297526727	5609912101068872	7643536345281337	5697610763737988	1304287048093109
SLC29A1	1.39457e+16	5575809305043586	4597728360672958	11963.2	93890
HSP90AB1	-1.34402e+16	1.07207e+16	2134224738290583	2.46154e-32	1.21411e-30
SLC35B2	45054562814675	6094075556475163	6602839669039742	1018162581471749	2190022969606459
CDC5L	2.23272e+16	7264478835296698	2.67284e+16	1.02074e+16	1.61126e+16
SUPT3H	8669282409793854	5184527037211357	1.45914e+16	1.33522e+16	4319581348866899
RCAN2	-9197862022086716	6420890136029343	2.65348e+16	2.58836e+08	1.27274e+10
SLC25A27	8443245366886721	5182483817649493	6560970895694851	9795649064933214	9849412232139214
PLA2G7	-2.45604e+16	4870924486731146	370024350029513	1.17982e+07	7.47529e+06
TNFRSF21	-3142889300593996	4909243264816791	4568715455254131	138730	1.07953e+06
PAQR8	1.38718e+16	5.35166e+16	2.15102e+16	3.5196e+10	1.47117e+11
IREB2	-4.86354e+16	653029421773316	8005102617907863	4664571913907529	1.08642e+16
WDR61	3443101889854072	6731762733198832	7002062981072598	8141583667718461	1.79271e+16
CIB2	9632078467351888	5443988266200077	1873239172567319	1.50406e+10	5.75762e+10
ADAMTS7	-2654636780013265	4834780662278673	3323924623576323	8.14892e+06	4.7544e+07
MORF4L1	1.42176e+16	835928630552854	1.2878e+16	2.56454e+16	3.47356e+16
CTSH	2.2976e+16	5917541682154601	6219065291343178	4.3034e+16	5256883379337399
TMED3	3206274785373427	7048439780930772	5085681510371684	2.41242e+16	4660570319295671
ZFAND6	-5392756561027109	8284309496624326	2.34833e+16	1.26005e+10	5.61851e+10
FAH	2064687550948161	6.30102e+16	1.6496e+16	1.99013e+16	281817985597752
STARD5	-3.06991e+16	5310091755112565	7034316907238087	0.0498351	0.604051
BTBD1	-8190013593995718	5485177658035969	1483854296806797	7000830989742638	7673389454056375
IQGAP1	8758738178939119	5595712852605633	2.1296e+16	3.93556e+09	1.63226e+11
FURIN	-1.47993e+16	5142325159988639	1955563100930147	9.77123e+09	3.82965e+11
MAN2A2	977662318483979	5551522653791578	2504721449851291	5.59435e+08	2.62023e+10
HDDC3	6692908005930949	4419620580570374	1.6275e+16	8984866387440295	9289094368956332
MFGE8	-3.00219e+16	6617569814309015	1497920113960248	1.92496e-20	5.71427e-18
ABHD2	-3004828041699472	5625901108734312	1312168562532941	2.52002e+16	3.42702e+16
FANCI	2.15558e+16	4888538514756063	3.10214e+16	2.55193e+08	1.39854e+08
POLG	1.48385e+16	4659201952552688	1861838717544437	1.59673e+11	6.0761e+11
MESP1	1485300683785488	6734477787417031	1013591804196209	7.67288e-09	1.43855e-06
MESP2	1.63837e+16	4861109311917486	2.80484e+16	1.18316e+09	6.05462e+08
ENSSSCG00000001850	-8079692706888186	5419088468866371	1.07623e+16	1035881839268525	2.81325e+16
IDH2	-4622744274707683	8547000610936113	1726982847262712	3.24296e+11	1.16754e+16
CIB1	-2.07058e+16	6899915185274072	2620324833826965	1.05503e+16	1.65846e+16
ETFA	-5463517170724019	6986323841244048	1.31654e+16	2.8516e+16	870274749906955
SCAPER	8695996597968435	5.95253e+16	1.84354e+16	1.75761e+11	6.64494e+09
RCN2	-1135584981081028	7532252104373739	7774278154262332	0.0117371	0.156138
TSPAN3	-4308998682076966	8603841981190444	1.64911e+16	4.88785e+10	1.71262e+16
HMG20A	3.00415e+16	5087640313231778	1.44927e+16	2286449228626714	3.1589e+16
SCAMP2	1.74005e+16	5132120642600437	3904167021985625	5320804467109799	619745653825759
CLK3	-6932288135873436	4873876476519161	5252542024783708	2.19147e+16	4289293992755277
UBL7	-2.15302e+16	6141215623429657	1.38608e+16	2.39069e+16	3278950639233354
NPTN	4.3385e+16	7397438432206824	9960166982308636	1599635452354948	4.15594e+16
ENSSSCG00000001924	-3238528253889703	6378975644508051	3.6885e+16	5478895693243051	9460429720347066
ENSSSCG00000001927	3.52783e+16	6067396612583772	4542616361932936	3.3061e+16	6.11443e+16
ENSSSCG00000001930	-9441337257075524	1.03651e+16	8694978229130133	0.000111312	0.00170749
SEC23A	1.97284e+16	4978246158602056	3750336481151191	5402732022377549	6276420264642572
MBIP	-6907615276343807	6232533731833456	1638424692623943	5.17132e+11	1801635378396467
PSMA6	-572291107587765	7791279193309628	2.43865e+16	7.88171e+08	3.63318e+10
NFKBIA	-1.05912e+16	5541197604051092	1.08916e+16	9660277391931578	2.65048e+16
SRP54	-3130656305674024	5625205689631802	2238546533834379	1.34607e+16	2037061626827602
BAZ1A	-2631263934083185	5801125791548257	7945551478690271	0.000493206	0.00674294
CFL2	-7212924736005464	5266442529107469	5830609568258945	1.57497e+16	3221271250207589
EAPP	-5998515177986361	6349956518759178	1.31996e+16	2.80006e+16	8561758263482883
NPAS3	-2680185770162833	5900005262391324	8368375097496994	927112132297053	9493201840128880
ARHGAP5	-4242076316354288	7439739010329033	1039946530274072	1.26052e+16	3.34677e+16
HECTD1	-2.47867e+16	6636222080281082	2.25129e+16	1335026523079377	2.02321e+16
AP4S1	8817302092262487	4779426134648435	6.54322e+16	105284483576591	2.25856e+16
SCFD1	-2476117828019367	558983327413029	9440006243735262	3312511027456158	4.26845e+16
G2E3	2311714199955996	4893308565967466	4962747328961656	18589.2	15683.4
STXBP6	-2492243475388222	5083681342114042	6223878726796332	4301613192813436	5256707412296503
SDR39U1	831443137310593	4759302768098835	7291989625519911	6926272778450734	1.55013e+16
DHRS1	-5763797593515325	5407399460190638	55173416961358	1.88289e+16	3763422271100261
IPO4	-244962887411478	6774194789738174	2.56501e+16	8727577880833735	9090518091602648
PSME2	-4.13009e+16	6443458321776831	7502866576394283	6160086678246261	1.39669e+16
EMC9	1.64001e+16	5742024689221903	8403047522242818	4.87206e-05	0.000716506
PSME1	-9420880969213384	5567507232324876	1.58675e+16	6903797530380777	7603426617107788
ENSSSCG00000002008	4247567760058816	5113413004209326	1.93009e+16	1.64748e+16	2400834073046628
THTPA	-3.28816e+16	5418217370944814	2.12855e+16	884003886373588	9177588792896828
ENSSSCG00000002020	-4555215157030415	541397794248639	3.91036e+16	4798926976191337	84488522161831
PABPN1	-2.51934e+16	8285705835734454	4777812856507277	2.88287e+16	5.44179e+16
SLC22A17	9800900451107732	585730729207643	1913855107565487	1.21564e+11	4.71265e+11
SLC7A8	429791874513751	5887313600352575	3240018096354749	718598445027333	1.19431e+16
ACIN1	-4015026594461571	6705892880924147	6009679142440712	1.42276e+16	2950435421476256
C14orf119	-255545527510661	5184733802293353	1.11535e+16	2909219641869168	3842207279848631
MRPL52	2.14564e+16	6.90962e+16	2.86218e+16	8656553376013305	9047403463243248
OXA1L	-6763545271374205	7000837221278102	2.42803e+16	8.32876e+07	3.82277e+09
ENSSSCG00000002045	827579866893527	4907102320371244	4905283431015306	8247196850214874	871330140114974
DAD1	-1676130220492635	9015956573014742	2.88613e+16	8934508522105684	1441188774382188
PNP	1451347080957419	5617735815060276	6.06283e+16	6.89368	71.9907
PARP2	1.99239e+16	5023843746092082	5.08712e+16	98.6282	8500.06
TTC5	-7355554903624034	519201157409012	8230075428747895	412018173375586	97521614163317
KLHL25	-1.27198e+16	7020371802469746	1036708977080492	3.08588e+16	4.02381e+16
ENSSSCG00000002259	-9480241027741626	5855134486057786	2.55483e+16	6132403712905234	6926364736154371
SLCO3A1	2.73154e+16	5390873014444857	1.08206e+16	2.98237e+16	3914625502095919
ENSSSCG00000002266	-5760962342525836	7120854894622843	1.5521e+16	8.15925e+10	2.7612e+16
MTHFD1	1.3071e+16	5971347893513304	4047573262745154	1.99073e+06	1.38145e+07
PLEKHG3	2.11786e+16	4275709698218828	2258592716031628	2.00951e+10	8.7002e+09
FUT8	6814417103728646	5993323108175199	1.5761e+16	6913665997082932	7607761519357433
GPHN	-1.3373e+16	6074653086215324	3.18147e+16	5727234540196672	6555158852876993
ARG2	-5.1224e+16	5.57887e+16	374735283155907	8465041287601951	8897050824699878
VTI1B	-2468719072710272	643573767986926	2.6823e+16	8699064984264455	907713450739336
ENSSSCG00000002296	-1.03347e+16	6079875909621441	238013513849869	1.06807e+10	4.82969e+08
ERH	-2797273522320465	9401349705274702	740498396729563	6504342339621936	1.46593e+16
SUSD6	-1.23583e+16	6.34087e+16	3726838788045258	102940	6.5742e+07
COX16	-3.14147e+16	5616697017271971	2223966233893515	1358835809592343	2.05201e+16
MAP3K9	-7851092414425068	4.589e+16	4406288972605369	3580665553097017	655417479739651
PCNX1	2.14889e+16	5157000369120843	7890427987901489	3.7439e+16	4.71165e+16
PSEN1	-4.97361e+16	5234201503035824	3.70171e+16	5435684955300085	9399571718819888
ACOT4	9427312089265472	5949910041223274	1.63317e+16	5.31672e+11	1.84674e+16
MIDEAS	5079853998351457	5.64472e+16	7166599280050515	7427344333100721	1.65123e+16
ZNF410	1.29225e+16	5645259213562642	4051402503359265	5244464860708653	6126345178878463
NPC2	-1.39312e+16	6992039155147632	5912603264706059	14.789	1505.19
ISCA2	-7789005937343343	607071159014616	1.46917e+16	1.266e+16	4.12061e+16
YLPM1	-3366116947658863	6187681972266893	2.56983e+16	1.08919e+16	1700071942317707
DLST	4968173331143093	5484931088856938	5121797436219747	2362713157939907	4578336889909545
EIF2B2	-5475548049104961	5681531721779752	797233479169357	777672671620216	8329569519205563
ACYP1	3145103675741318	4764201278981481	1.00473e+16	9201568829476782	9449943073803574
NEK9	1.77946e+16	4915434002280123	3.43435e+16	9532680748002956	9671508073160036
FOS	2807725595955242	9956841507293020	6529241448146395	1.06115e+16	2.27483e+16
ENSSSCG00000002386	-6563410883787695	5216431372742629	3773017034620395	5.20856e+16	9063036472301976
GSTZ1	-4.38988e+16	6092476678327914	6776487005888665	7946193647610907	8458000276972301
POMT2	-6155672657419864	6115924242392772	9858784730340796	1.69023e+16	4378883547587242
AHSA1	-1741238470332488	7518079416332142	1910436381571401	8900677057428402	9232688807472276
CEP128	227452506091922	435094852724974	2631340260174511	2.90267e+09	1.41968e+10
GTF2A1	8545730071384919	5503752902338779	9422657302181392	7588711760626212	8179327586003575
SPATA7	-4.59218e+16	4862189829762234	2023469681708013	1548848803176998	2.28415e+16
ZC3H14	6274297080909104	6.65772e+16	1.85e+16	9656922334223184	9749198305507852
FOXN3	-1059659940369444	6378151127418091	2847886150385214	9.47271e+07	4.91019e+08
PSMC1	-3364016628345537	6392522892136657	4777560233174034	288329433268751	5.44179e+16
TTC7B	1.48524e+16	5.1569e+16	3.68293e+16	5439361750309948	6311470782299563
PPP4R3A	-3.26639e+16	5929282168002069	2.72894e+16	9854470498095544	1.56534e+16
TRIP11	-2.57918e+16	5995215392069281	2108011630957325	1465296020951167	2181443716354512
CPSF2	2.32016e+16	5419374434356385	82082096438773	3649402444605354	4614566108389849
ENSSSCG00000002449	8902886175762076	893666477130967	5113445313975529	4745573972950682	5668154007572371
LGMN	1.23137e+16	5287559592391738	3.30613e+16	8.92998e+06	5.18181e+06
CHGA	-2993647708216204	1.23838e+16	3825387134639529	5048168478558201	8819228401641671
ITPK1	-633219780823789	5374090220454152	7320431268483598	6817505043663506	1.52846e+16
ENSSSCG00000002459	1.14301e+16	763834131902819	1.06253e+16	6.49074e-09	1.27274e-08
ENSSSCG00000002460	1.97323e+16	5368907513174346	5.18162e+16	609.48	53977.7
BTBD7	1.71803e+16	5444761785284641	6219736574942019	4303148067644891	5256883379337399
DDX24	3515107497338041	6.75905e+16	6614541216752341	1011493936109944	2.17714e+16
SERPINA1	-2.43073e+16	7661476072911333	1.49256e+16	2.52058e-19	7.44791e-18
GLRX5	-1.88436e+16	7002512673727491	2.17046e+16	1406840300763418	2.11108e+16
PAPOLA	-6907708420031108	7750098289689168	3.20486e+16	571315770300649	6543902678041731
VRK1	2.89163e+16	5646991528851854	1.5534e+16	1.17995e-20	3.70874e-18
BCL11B	-2280753040914343	5.06633e+16	40835418768466	1.65604e+06	1.15923e+07
SETD3	-8179291182887939	5383166849380637	1.19872e+16	535673367393793	1.54718e+16
CCNK	2599313090210276	5206075322292767	7279126481289104	3.93561e+16	4.90574e+16
SLC25A29	-1.81233e+16	5465065108601309	447555437626295	22323.4	1.69594e+06
RCOR1	6344889361012561	5580512567214324	7967148273788638	7777431016319993	8329569519205563
CINP	-5975772916361846	6095159048871059	8052856175029328	4543197187504365	1063562627465425
HSP90AA1	3883972122314975	1.02538e+16	1.49946e+16	1.07818e+16	3.56357e+16
PPP2R5C	6770344538835925	6440581331436224	1.2752e+16	3.55633e+16	1.06358e+16
ENSSSCG00000002547	-4.74566e+16	7168861358523669	1052655923317441	1176710893014843	3.15298e+16
NUDT14	1125164584126167	6889857289530113	6669000667772794	0.0317742	36.0595
CEP170B	2.47061e+16	4898396833194254	8261762144602578	3633805520318299	4602640412884156
CDCA4	1.12761e+16	6478977332309012	5.32604e+16	2921.32	26494.3
TMEM14A	-1.54569e+16	5816747958046979	6915550933094465	4.05636e+16	5017240819674089
GSTA4	-1.243e+16	7740112572596336	8315150648460724	7.59994e-05	0.0111258
CILK1	-2.48037e+16	4734879260806601	6840416946724144	4.08198e+16	5042127593913439
FBXO9	1.2032e+16	5609023089907945	4.07138e+16	176234	1.22944e+07
ENSSSCG00000002637	-1849265665411566	5.20305e+16	3313757161405584	8.58634e+06	4.98692e+07
ENSSSCG00000002639	-4.02049e+16	8051421315691078	2.89061e+16	7.96597e-50	6.38473e-48
DEF8	4455254906228779	4988193104174701	3.07964e+16	7927811110690398	1.29809e+16
TRAPPC2L	4.79542e+16	723703806591968	1.75171e+16	2.84738e+10	1035588370375485
APRT	6032369268208978	7196838143027904	1.68307e+16	4.08671e+10	1.45014e+16
ENSSSCG00000002651	2596671270194985	4708028093423279	341759830537642	5.03465e+06	3.00859e+07
MAP1LC3B	-3265981503502449	7362049490703137	7558448524776153	5972939061834023	1.35955e+16
ZCCHC14	1.24744e+16	5287829745951343	3.01794e+16	5827596689570721	6648852308456844
GSE1	-1.66292e+16	7042622169690087	8433779334905103	4.17066e-05	0.000621913
KIAA0513	-5329397222196571	5408858979462135	5224912245882751	2.22656e+16	4.34602e+16
CIBAR2	-2.00229e+16	4431456705370424	1694670371452945	3.8444e+10	1.36946e+16
USP10	8942660725645263	5.50339e+16	1.84078e+16	6678921327142677	7405368070143324
HSDL1	-4922214755032129	4861837906437202	2.10098e+16	1.47205e+16	2.18711e+16
CMIP	-2.8383e+16	7170123721316661	2660567156593604	1.02864e+16	1.6217e+16
TERF2IP	-1.05847e+16	824336269517696	7534692588422618	0.00394863	0.0505361
KARS1	-3351033296392728	784997778845804	6119425698675485	1.33704e+16	2792545725443679
GABARAPL2	-5735259619941777	8552250002340589	2037159871895207	6.37692e+08	2.57486e+10
EXOSC6	100341026879852	4723386948955116	1.12676e+16	7887192260565432	2203602473845122
ENSSSCG00000002722	-6684924651943163	513961754276184	6132921663730071	1.32687e+16	2.77583e+16
AARS1	-5484140765180977	5415312700681228	5536295869512559	1.8626e+16	372984693821893
AP1G1	1.87811e+16	5588713634601391	6361687964821243	4251015460598424	520976894750709
ZNF821	-145607540102928	4996103516359815	1983493912315481	8.44253e+08	3.36024e+11
IST1	-9484579664923944	6755574897452369	5127347514725216	4.73957e+16	5664519678111666
ZFHX3	8075208594360518	5715041128154301	1.59612e+16	6.46555e+09	2.22409e+16
NOB1	-1.56147e+16	6022166998187497	4.04801e+16	1.98626e+06	1.37983e+07
NFAT5	691874454570004	5673224377946085	1.24186e+16	4250701247127991	1.25313e+16
ENSSSCG00000002759	2.07556e+16	5187038236027469	5158166688957024	4.72632e+16	565394426556309
TERF2	3219869096035274	4883601618782152	1.09901e+16	9165076995532656	9423744980012092
PRMT7	-4.59666e+16	5502347391849836	4.17552e+16	4101191484526054	7367281300536098
CENPT	5438570696377249	4884302850974915	1.50672e+16	1.23593e-19	3.72056e-17
THAP11	3563206889506976	5002167118809359	1.32885e+16	2.49011e+16	3391368199074981
ATP6V0D1	5.27976e+16	6824056127836824	1.18968e+16	7301562917693193	7930168297085898
TMEM208	-1.75721e+16	6389074802170373	1.36096e+16	9071292201038882	9354263831507126
CNOT1	2.31597e+16	5810674751353246	1.58883e+16	2074930788645088	2.91828e+16
CFAP20	-1.12446e+16	6764612467384902	5912257064066004	4.41946e+16	5371028774191927
MMP15	-1.19844e+16	4973076396941108	1345513792922317	2443361314738692	7548576165336045
KATNB1	8785399238302889	5182080649066222	1.13733e+16	735933508702146	798174164038931
ADGRG1	-2.35386e+16	6136598839748047	6224337590093444	3.03528	32.169
ARL2BP	5174643671915699	5238835382646321	3117568336581657	7745228455218223	1.27405e+16
RSPRY1	-1.00839e+16	5148236055054022	9104696096065768	2.54954e+16	6343676826471873
AMFR	-1.63707e+16	5.08711e+16	2502333443700593	6169108204314875	6950680338440868
TOX3	-3565401729124297	5.93612e+16	3.875e+16	4.90104e+16	8597930700890177
N4BP1	4357237577097236	5305083987899426	3814877691409934	5079931383615424	8870511991215169
PHKB	-5.69619e+16	5.77886e+16	8558123894867009	7698717071533979	8265936681626904
DNAJA2	-4.3742e+16	5974178463330002	5.70884e+16	1687965820387011	3.4175e+16
SHCBP1	5646473019490153	4.87111e+16	2.00884e+16	1.33935e-29	5.92269e-29
POP4	-549185813035035	5182050385989754	3943257142966411	4705957738694985	8312562264603925
CCNE1	2603418835181993	4484253307596825	5.3658e+16	238.615	21857.1
ANKRD27	-8355585966259762	4829847473159507	6218254334825287	1264397191250272	2.66075e+16
PDCD5	544512416989377	7719881627889282	2543061808214548	4.58582e+08	2.17648e+09
PEPD	-7491717239036216	6611245677701978	2.52722e+16	4.97837e+06	2.35235e+09
LSM14A	-5432054870633932	7056234202985042	1.44766e+16	1.41915e+16	4.56577e+16
GPI	7464603500783542	6746060493002723	1.46147e+16	1.31884e+16	4.2709e+16
GRAMD1A	-7420515736778662	5089523316763865	5938344195306575	1481493042755884	3.05445e+16
LSR	424039545367292	6549855975515518	5919755843671494	1.4972e+16	3083863689960831
USF2	-3.01406e+16	6122674981774445	2739714639058408	9788224467042100	1556213619704288
ENSSSCG00000002891	2503191031639064	5556030232692513	611519971319332	5.28341	55.5365
LIN37	-3469417776284871	5163019999850912	1.50463e+16	2199609452690263	3.0561e+16
RBM42	-4.65825e+16	6793036846176286	1.14029e+16	7332830342894526	2059841745104582
ENSSSCG00000002907	-4266851771162831	9218019391017368	2195364505948625	6393933469384289	7152460119625271
ENSSSCG00000002913	2382704646487939	5189636998876146	1.0687e+16	4.7545e-10	9.49715e-09
APLP1	4.47573e+16	7111997139246653	6253820470357649	1.23926e+16	2614715487426986
TBCB	2312699861602751	6451164787156841	1947039349994462	1.62906e+16	2378312505968748
ZNF260	-8039161243359847	6014687451673649	1.18331e+16	5818798489919525	1666374985143546
ENSSSCG00000002935	1.10096e+16	586853594596667	2.16787e+16	6414993940190651	7171014843881182
ENSSSCG00000002937	-3.0813e+16	519469918197368	1.52032e+16	2175717814143327	3027890108724668
YIF1B	1.02515e+16	538201847082379	2.50586e+16	5.56143e+08	2.60672e+09
ENSSSCG00000002953	-3450450909379337	704836568658246	5.97792e+16	1.44861e+16	2.99636e+16
SPINT2	7887576595762034	8754330162938585	5966707967931786	4398510945991318	5350955523948123
CATSPERG	-3.78888e+16	5287740270776188	2.4654e+16	1.16378e+16	1800451649138628
FAM98C	-4.37005e+16	5376666353485349	3.55015e+16	5953992297934631	1.01643e+16
ENSSSCG00000002963	-8829390761207556	880716485904753	4.17014e+16	5184305640066093	6069338645993023
ACTN4	2.57751e+16	6546877962324843	2.80276e+16	8670439339455123	9060439544424096
ENSSSCG00000002972	1.04773e+16	5.78145e+16	2615905307000594	3.1442e+09	1.53196e+09
SNRPA	4.56647e+16	5692562684384843	4530045693188942	3330472846436963	615772545886788
B9D2	-2504865376414693	5822485086877467	1.44298e+16	2.29658e+16	3169539775066968
ENSSSCG00000003042	-2.95546e+16	6718842920079289	2.83649e+16	9214513981815076	1.47968e+16
ENSSSCG00000003046	-3.13307e+16	8092085743361618	3489246951195774	6176867683072605	1.04723e+16
XRCC1	6653338156545137	5160680494946618	8292706921159699	3980461033097906	9452857831193988
ZNF428	-8986672514811256	6997690473775195	2.88587e+16	5911273337695622	6718022800656562
ETHE1	-3.11353e+16	5.79194e+16	2.52459e+16	1.12084e+16	1.74565e+16
ZNF283	-3176547883966882	5.50263e+16	2.14576e+16	1.42964e+16	2.13929e+16
CLPTM1	2.28926e+16	6141555024849547	1.52921e+16	2.16231e+16	3012764990368958
APOE	3867802218390883	5168664462974345	5510418429524755	4578923099063317	5522959915574489
TOMM40	-5.23883e+16	5733740005747345	694066854859976	7922026115915236	8442085998877928
ENSSSCG00000003090	-2.37253e+16	5775143649178397	1.00128e+16	3170006039427673	4.11709e+16
FOXA3	-1.40178e+16	5830889233454755	4352759980383823	4180.22	3.08087e+06
PPP5C	3.40043e+16	6.36306e+16	4501318638045591	3.38687e+16	6242220915918764
CCDC61	-4588906030116804	5444014791877776	4077446059412942	434592998529229	7766472426336166
STRN4	3.16841e+16	5171312643357827	1811996328839097	1.78269e+16	2570986107698928
AP2S1	5399568893427876	7595110655358721	2.21541e+16	2.51622e+10	1.07847e+10
ARHGAP35	-1.18583e+16	5.6949e+16	2.39898e+16	6242797065588053	7015214648536733
TMEM160	-3.04537e+16	6274274904943462	2.5985e+16	1.06965e+16	1678152219576315
ZC3H4	-9202498810236600	562465231308204	1.02616e+16	1358284064855742	3.58556e+16
SAE1	7773342529934771	6229010144075372	2273714092202982	1.85743e+10	8.07994e+09
NAPA	3.76519e+16	6127687881676203	5.43867e+16	1969562782164041	3909856519887254
LIG1	2.45488e+16	4992906296378625	5.67024e+16	5.07011	491.081
ENSSSCG00000003132	3.38921e+16	7646667781000248	8246312314659132	7739868027650272	8300390331709908
CYTH2	-9778249238492186	8107352799870268	5570081260439361	84.3834	806.358
BCAT2	-9309654945388188	6063583004598391	245370014372051	7.28964e+08	3.37482e+09
DHDH	4.24059e+16	5911726654540201	4347281332535163	3.70681e+16	6748443254588594
RUVBL2	7138772120937692	6154201101446489	1769876430254544	2.58795e+11	9.50396e+10
FTL	-2.0466e+16	7126351725126159	1.49645e+16	2.21218e+16	3072238521555466
GYS1	1.55975e+16	4992630054868395	3.09886e+16	9556067454611364	968774601828659
PPP1R15A	-5418876127439053	6001811821989788	4527578424778058	3.33528e+16	6161280065306579
LIN7B	-3.2014e+16	5745445002299056	2.70269e+16	1.00179e+16	1.58643e+16
ENSSSCG00000003165	-3.88369e+16	1.16069e+16	1501745010304591	1.06522e+16	3.5298e+16
ALDH16A1	4158944314464555	5433919249871959	3.62128e+16	570448610914197	9794934716190692
PIH1D1	1.03862e+16	5509544519236842	2308516110254824	1.54982e+10	6.83789e+09
SLC17A7	-6092868145957952	4980440978202903	7915734007546861	0.000573553	0.0077751
IRF3	-2.13467e+16	5662346881327981	1.14365e+16	2.84883e+16	378114235519337
FCGRT	117052341436594	7550651159338851	3.7365e+16	979645	6.27521e+07
IL4I1	1.508e+16	513948888221319	3988658655702166	269145	1.84376e+07
PTOV1	-2800091074832018	8153151007286198	5946093294276352	1.47499e+16	3.04301e+16
MED25	-5851455149765388	6872567944272074	1977785428567601	8.69847e+09	3.44713e+10
FUZ	1.15751e+16	5268611951193135	2548966854225796	6136480812628502	6928776305645963
AP2A1	1.84012e+16	5.91466e+16	1.07683e+16	2.99408e+16	3.92678e+16
NR1H2	-1062638392755642	5376755311250049	1805625351727023	2.14473e+11	7.9768e+10
POLD1	3457806021981376	4848756367731929	1.45299e+16	1.84716e-17	5.26401e-17
ASPDH	-1.09379e+16	7543621200299643	5977399472288118	10.64	1100.38
HAS1	1.72584e+16	5031154059943563	3.47179e+16	5557144161585776	6421410770244729
ENSSSCG00000003261	617628472261512	8330556067630548	2567733345694421	4.03539e+09	1.93675e+09
PRPF31	-2796588999074948	5816315753836696	2.22646e+16	1356645861890424	2049673248454618
CNOT3	3610710700269177	5364158018940077	1761066366769448	8944265494258181	9260557136958414
LENG1	-2.43121e+16	5200800429667238	1.02191e+16	3.12067e+16	4063720685065556
MBOAT7	-3.28773e+16	5323001212482158	1.86062e+16	1.72553e+16	2.50092e+16
TSEN34	1.04772e+16	6413217950060349	366345577708854	5450030112222937	632041835405561
HSPBP1	2.53873e+16	5276440619600758	1112968188229841	2.91438e+16	3.84664e+16
GALP	-6135460194255234	6531430278150282	1.22229e+16	4.72059e+16	1.37771e+16
PEG3	5954201454123377	5807061487916409	8499443502359783	3.55255e+16	8521869878758378
ACAP3	-1.26548e+16	518567195235078	1.62597e+16	5.52257e+09	1.91306e+16
SDF4	2304400122021127	6922605032204655	3.23592e+16	7203997219562298	1.19699e+16
UBE2J2	-7984400139064638	5034065764508846	8198909273148328	419155806891781	9891891916783584
PUSL1	-1688375651224713	5290213756531992	3476459126337484	3.7208e+06	2.25712e+08
INTS11	6736751002229896	5283825110624973	7.54088e+16	6031447507888767	1.37092e+16
ENSSSCG00000003348	-2681512017155548	5438379306216913	9533036747332524	3.2888e+16	4243866509261764
CCNL2	-5074833280753133	5573238179862739	4777132446973269	2884010733216707	5.44179e+16
TPRG1L	1.97797e+16	5625702753412008	1042700420226371	3.07194e+16	4012486394833697
WRAP73	1.22473e+16	5421692214151956	2.95435e+16	5.46752e+07	2.89494e+09
RPL22	-1.52341e+16	1.06247e+16	1.85477e+16	1.7323e+16	2.50904e+16
ESPN	-1.57307e+16	4942427420157041	1872498310035939	1.50991e+11	5.77314e+10
ACOT7	-21678136307615	5679409749139182	8693166071709904	3.51145e+16	4.47711e+16
DNAJC11	-5260822126602265	4934677211162468	3.35635e+16	6694616914646585	1.1243e+16
PARK7	-1.79771e+16	9045124613266934	3.25724e+16	7110865681868529	1.18397e+16
CLSTN1	1.41961e+16	6071794061486836	5170413461310641	4.72106e+16	5648715896655687
KIF1B	-2.37416e+16	5592788928311574	1259030351567061	2618347116258194	3.53375e+16
PGD	-4.15877e+16	5453143998128638	2.87391e+16	9002618662287996	1.45001e+16
CENPS	2.74246e+16	5924878734669239	1794970358652089	6.24078e-26	2.3819e-23
PEX14	-4.05546e+16	52682971781977	1.99297e+16	1.58031e+16	2.32087e+16
MAD2L2	1244760706706493	7.21463e+16	6239583272606559	4.2958e+16	5250605891957577
ENSSSCG00000003421	-5221040729051993	5666440096410979	6312047758274897	1.1992e+16	2.54528e+16
PLOD1	3167010971591721	5554244938010609	2328673930052716	8787137784875191	9145622345116614
FHAD1	9385639832925704	5440693911884738	1.83077e+16	6687422187183347	7413511594782093
CTRC	-1137353126763772	4908519108562762	1.05609e+16	1.15507e+16	3.10017e+16
FBLIM1	-2.10854e+16	5691617129418506	558933535075311	76.5108	732.22
PLEKHM2	-8189188626740644	4.64454e+16	5.93343e+16	807551251397348	856853234050347
FAM131C	1.56144e+16	5377884979107393	5.37721e+16	2251.51	20682.9
ARHGEF19	-1.93974e+16	5021499127901424	2.31324e+16	1.51224e+10	6.68722e+09
SPATA21	-6186128964586679	6064756539716845	1.09149e+16	7411153657495527	8025724920091424
NECAP2	3112337674341776	5.34507e+16	2.06132e+16	1510789338563863	2236707743909372
MFAP2	-1075496197849378	6246039925752381	1.82406e+16	1.94681e+11	7.30422e+10
RCC2	-6151842985520991	604887969689426	7794971805997717	523918280364279	1.20884e+16
ARHGEF10L	-737135538889746	5769370800819589	1.27458e+16	3.56808e+16	1.0661e+16
UBR4	-5787272799288556	5305368655080596	3717312056436601	5385099560021518	9322153989972456
AKR7A2	-4478081241483953	5847574937752058	4.76606e+16	2902614258742355	5467904737699722
CAPZB	-519624533224851	7.50892e+16	1.53493e+16	8.93531e+10	3.00279e+16
DDOST	67184233596362	8061322622327614	2.29856e+16	1.63219e+10	7.16824e+09
PINK1	-3817015701999136	528679907446569	2046898252434408	1.52517e+16	2255909300914833
HP1BP3	3.00048e+16	7701668280077239	681547931291985	9037104441845080	1.96894e+16
EIF4G3	-4131762003312354	6846559913726738	7591275183781711	5865144846402399	1.33816e+16
ECE1	2990260506893322	5464779290638191	1.64639e+16	1.9945e+16	2822184520124885
HSPG2	4615366454285112	4375220324111224	1.21597e+16	2.70152e+16	3.62313e+16
CDC42	-2823353090770587	8252755771537881	5592453247432033	1.8038e+16	3626116112538702
KDM1A	-1.14118e+16	6.45353e+16	3891980312225798	4.41578e+06	2.95862e+07
LUZP1	-6159758062510878	5771766126918757	5517431274040103	1.88279e+16	3763422271100261
MTFR1L	-1.31758e+16	5.72011e+16	3332930882827398	7.78012e+06	4.55165e+08
ARID1A	-4.23675e+16	7297905283941714	1.14288e+16	7231249388713648	2.03452e+16
NUDC	9651316059526608	7629011983787821	5319390900262461	3021.94	27329.6
KDF1	5588315637895568	5193922684597174	5.71536e+16	1.68171e+16	3.407e+16
WASF2	3.2419e+16	6450221673746603	3030153382403526	8173028997228018	133347231374621
RPA2	2.12066e+16	6788204551920267	1.41544e+16	1.2236e-16	3.36726e-15
EPB41	-9490311958479484	6722437853166113	3806907002479939	682840	4.46773e+06
SRSF4	7643651939287527	7662775732692468	4596857941593413	4.97771e+16	5885500124899337
PUM1	-7660938162059132	639141510635507	1.60781e+16	6.07818e+11	2.09534e+16
SNRNP40	2.42462e+16	6.67648e+16	3.059e+16	861158190166092	9010682629479408
ADGRB2	3.01016e+16	4.1759e+16	5.03439e+16	12903.2	110167
EIF3I	2.28133e+16	7565667942036766	2985274947032581	8402501605532825	1.36501e+16
HDAC1	1.25152e+16	6.88277e+16	695414680036599	4.04329e+16	5003968003747601
TXLNA	9913973985358524	4889026849143381	9427933060035594	2137050201040002	5409698337571454
ZMYM4	-2.53831e+16	5254222012155204	1.09818e+16	2946664744310937	3876490426861249
CLSPN	4174760716143908	5083478578917101	2.09514e+16	1.75375e-32	8.39183e-31
AGO1	-564912127273572	7143196964822793	1.4738e+16	1.23534e+16	4.02901e+16
MAP7D1	1.89559e+16	5231499258548099	5970611297151152	9384089702202556	9575236023316804
SF3A3	1268336760640269	6449797334248468	4952125685241171	9438981009626940	9612527722550106
UTP11	-7120036252709145	6580260435984513	2.29097e+16	1.6979e+10	7.43642e+09
RRAGC	2678332070302483	7162236877514281	4025673484917137	4.48127e+16	7963946450999662
AKIRIN1	-1.94374e+16	7075428696996354	2166307930886175	1410645529508181	2.1158e+16
NDUFS5	-2.31398e+16	8868803170816118	5102855606748647	2.38865e+16	4624401060247829
MACF1	-184496021192251	6846415766747181	1897208431735642	8904465458527384	923426047550988
HPCAL1	-3554349195636441	7.04604e+16	2.59688e+16	2.0066e-42	1.41388e-40
TRIT1	-1.06514e+16	5.76161e+16	2.28914e+16	1.71417e+10	7.50255e+08
RLF	-5486707240984895	5142839217879873	4792130984932219	2.859e+16	5.40287e+16
CAP1	-4063625346585488	6857718035418998	8935109627434201	7650037287281282	8227447012084464
CEP192	2.02324e+16	5981780193677628	4311045816270518	511447444070197	6003171619369619
RALBP1	6829739102981017	6769811620317519	2.84376e+16	9.6768e+07	5.00384e+07
ANKRD12	6189912156487523	7148022969452106	2.28651e+16	6325261947862327	708676910880539
EPB41L3	1.98478e+16	5039172253393385	4429349595502478	282654	2.11479e+06
MYL12A	2308971764558797	8620538643695568	4583377011200009	3.22835e+16	5.98964e+16
NDC80	6984567379436793	5672379459208404	4.33645e+16	2.61589e-80	4.19327e-79
ESCO1	-568586210945265	5064758351117546	3.52003e+16	606312904634916	1031761768715255
SNRPD1	4002461740738392	8573954399036367	1.41035e+16	1730254362280227	5478711590588056
GATA6	-2.22735e+16	6445923591700184	1.04898e+16	1.28589e-08	2.49097e-07
OSBPL1A	-9557957774611202	6402066755144929	2.46948e+16	6.71638e+08	3.12521e+08
HRH4	3041300167360594	5057454853651646	1.53351e+16	2.15587e+16	3005749729205512
SS18	2687048826140218	5989778616406665	1955945847043509	1.61948e+16	2.36755e+16
CHST9	1.10658e+16	6393616557759481	2.6482e+16	2.66008e+08	1.307e+10
RNF138	-3091019756339911	6182599044749918	2.86074e+16	907655642829708	1.46008e+16
NOL4	-1.46593e+16	8035433116554817	121182066768823	3.48624e-12	7.6817e-12
MAPRE2	1346564549765763	6682430497620318	9951724788420222	1.94462e-07	3.4927e-06
ENSSSCG00000003741	2.4131e+16	5.2396e+16	9296396598363900	3349565767495555	4309272813238663
GALNT1	5330172176175416	6538841269480804	7166076732115201	7429508232337583	1.65123e+16
CELF4	1911813313767937	5072927671633073	269565317971696	2.08083e+09	1.03589e+08
PIK3C3	-2.87574e+16	5079867938821552	8153051717317901	3.66556e+16	4631250628825788
SSX2IP	1.07322e+16	5549785240662768	2813955289057243	1.12875e+09	5.79005e+08
DNAJB4	6338798804347453	5408463219111008	9257526462012964	2.3453e+16	5874232773115487
MIGA1	1793582378416664	5628435885282559	7471195003236755	3873897492046402	4.84577e+16
FUBP1	-2316992491859694	7299052386505657	3.25116e+16	7137278381304737	1.18745e+16
ACADM	8794632938882369	5097139245551966	1.27456e+16	7210845111617754	7855239357066436
CRYZ	7935148723553122	5427800240624754	1196143437933824	5431304352815319	1.5666e+16
ZRANB2	-6597144623925312	5397583991543596	7685221909428025	5567483351837007	1.27678e+16
PTGER3	5125595588741931	535632234818008	3131763914729607	4.43895e-54	4.06608e-52
CTH	-3.87449e+16	5420792579892639	2919165011624017	8753314857386028	1.41559e+16
SRSF11	-1.1662e+16	7339798200199343	9103459987305084	3.40023e+16	4365689056372078
WLS	-4030642230786766	6209103570781212	3.29987e+16	692852087630819	1.15747e+16
DIRAS3	-1.14481e+16	1.11615e+16	5.34249e+16	2686.66	2447
SERBP1	-2.24426e+16	9254440949873404	5209688101055608	2246136381598083	437890741222466
LEPROT	-6453537485823884	5747734045657499	4.69e+16	3.03386e+16	5688045483161362
DNAJC6	5702209258169617	5201730460554738	6154137290430512	1.31105e+16	2749004513389649
JAK1	-8791064917461378	8247361578561671	366430692724029	1.41862e+07	8.95298e+06
ROR1	-5302097799475595	6066116405630011	8591506448799242	3.37735e+16	8165737627483792
ALG6	1.22832e+16	4.64327e+16	1.04977e+16	1.19521e+16	3.19454e+16
DOCK7	7542419874962204	4970968549550993	7527367354514581	6076864565085832	1.37929e+16
USP1	2047475076529828	7287553594426181	2.60126e+16	1.61046e-42	1.14736e-40
CYP2J34	-3332661038590863	5795693756117051	2343044815005335	1.25843e+16	1922823298657316
LRP8	-1.19071e+16	4813579671964318	9651355976455024	1.89212e+16	4.84709e+16
MAGOH	-3079623066213701	7301040276378272	4518801593954933	3352430599742787	6187618021171776
CZIB	-4.01036e+16	7.35589e+16	993582627127676	7526011071164279	8128142662675654
ECHDC2	3.63684e+16	6182832291290859	4682244926468773	3047589697607169	5708777429464554
TUT4	1.82673e+16	6255886230991012	1.01263e+16	3142738836061722	4087069184088836
ORC1	5059791042045346	4611834831099814	1.01814e+16	6.09792e-09	1.15339e-06
TXNDC12	-4.22247e+16	6421963595185272	5524777098423414	1874899159000685	374979831800137
NRDC	-5881207769688782	5418573426565135	5663530883720952	1.73212e+16	3496966417646043
CDKN2C	3.60352e+16	5803318562486751	2032014191784903	4.18059e-31	1.88774e-28
FAF1	1.07054e+16	508757001822127	1.00758e+16	1.50232e+16	3933096818554851
CMPK1	-4964480090981593	7722776818101846	1.61653e+16	5.8048e+10	2.00744e+16
MKNK1	-1.03141e+16	5.50918e+16	1.21866e+16	4813413142548763	1.40353e+16
LRRC41	1.50952e+16	5662428672765829	5606407091836125	454002206257018	5484291911303691
ENSSSCG00000003909	-1431871235596054	5151585779623545	2518680816664711	5.20369e+08	2.44799e+08
PRDX1	-3074778689364204	7818433635957402	6063794170659554	1.37981e+16	2.87251e+16
TOE1	1.73043e+16	4640129924289707	3584237247454125	2.13944e+06	1.32542e+08
UROD	-2.60648e+16	572883117768608	1.75227e+16	1.85592e+16	2658061787553551
BTBD19	1455522106780034	5254865714718769	4.46287e+16	238176	1.79668e+06
RPS8	1.39745e+16	1.16121e+16	1.20073e+16	2.73176e+16	3654510347188819
KIF2C	3417903697478298	4830153237210533	1384620381361488	5.77488e-17	1.51137e-15
HYI	2696372788526339	7153226922940012	3.77353e+16	520696811938679	906272518499134
MED8	-3871149434293329	6115717472050837	503161051539845	2.48887e+16	4792391221732849
CDC20	5548507066888594	6990735896002643	6521297810782453	7.69001e-129	3.79295e-125
C1orf210	6944450967842472	588003126201962	1.33758e+16	2548914251148829	7849970306612052
PPIH	-2.71419e+16	6172675291284255	2718609377420023	9918439297844284	1.57277e+16
ENSSSCG00000003965	-3575318836691901	6175617423577737	3.84669e+16	4984427242763508	8718708149730915
PPCS	-7688297115886731	556627905977359	1.14602e+16	7110360473419902	2003147247608454
GUCA2B	-9371123243901324	4978132613520786	1.0665e+16	1.09185e+16	2947758066133194
NFYC	2404561162177162	6398499934837533	2688314439623235	1.01087e+16	1.59726e+16
ENSSSCG00000003986	-1061131077325538	5320488390436254	163285171449429	6861497743330546	7567238309294024
ENSSSCG00000003987	-6082651227624913	528464072767258	4528838609385783	3332822854075619	6.16029e+16
ENSSSCG00000003989	8125724177011798	5155987975617799	8713555171694765	7678507906436071	8250132057122367
ZNF606	-1061033349152277	5.97989e+16	2.36591e+16	1.15e+10	5.14931e+09
RPS5	-4.22846e+16	1.05018e+16	9181101552624868	2.44527e+16	6107931056508537
ENSSSCG00000004017	-2.21833e+16	4715774301890308	2.13793e+16	3.76818e+09	1.56588e+10
AFDN	6703699489356868	5026675089931611	5816271790497044	1.58786e+16	3243497059972031
SFT2D1	-2.13694e+16	6050638171222175	1.47423e+16	2.2468e+16	3113782841896741
CEP43	2532731034042544	5134248644626514	4237627426952244	5150654552641071	6038569045851359
ENSSSCG00000004024	-1.65115e+16	5287004721746146	2146990121061733	3.59426e+09	1.50042e+11
QKI	1.219e+16	5956152520133507	3.64657e+16	5459311528296006	6330037164454609
AGPAT4	-6202542104779358	5024494220032419	4861338561084166	2746501944390908	5216401204808798
MAP3K4	4.92523e+16	4941684815762766	3364430846811562	6661859990790489	111938800474184
IGF2R	2.99807e+16	4666634926781827	6.02834e+16	9381125370287038	9575236023316804
MRPL18	-223701550188772	7030326561804227	31903327354916	7407493290481411	1226358042307431
TCP1	-1220756465585848	4741345581079363	1528214188966519	6958535597882406	764009079685308
ACAT2	1.08958e+16	6693625687169079	662704132717117	4156069029128725	5115791574785312
WTAP	-7459394710204356	6815515491924135	2.40255e+16	6240223199185575	7013551472949677
EZR	1.00923e+16	7076552286421399	563029817465771	6.21211	599.881
TMEM242	-3.39759e+16	500827501041234	1.5331e+16	2156478977141846	3005944174224678
ARID1B	-3790701400254988	7865411839233282	1.05197e+16	1181094680855731	3.1634e+16
SCAF8	-3.23311e+16	5895227515662679	1.68221e+16	1.94631e+16	2.76406e+16
CNKSR3	-3.93092e+16	5096699175300977	6816010945905903	0.150745	1.74472
RGS17	-1.04709e+16	633027542816115	3461758656096123	4.01265e+06	2.42727e+08
FBXO5	45089554977699	4798073094826973	1349568700023671	3.37419e-15	8.38579e-15
ENSSSCG00000004082	1.21774e+16	4711260889931194	1.64051e+16	5.11487e+10	1.78436e+16
ARMT1	-9359213288894732	4604233086271445	3.65704e+16	8483424487575334	8906528242027464
LRP11	-3.84911e+16	6006864081460384	3255868476334811	8568069558807293	8973940217424431
PCMT1	3681783673970849	7415094347961931	7734059765369084	5418877305715844	1.24671e+16
KATNA1	361891515165028	5532634973868447	2718356448936099	8690428503005085	9073933815546100
LATS1	-3.8663e+16	5.9525e+16	3446629293577441	6338090231490355	1.07286e+16
TAB2	-7419914283853074	5.80699e+16	7932612688624197	7782127079261982	8333166137646598
STXBP5	220401572527025	5.1663e+16	4547956012352743	15424	1.19443e+06
SHPRH	-7588378889766244	4923647088511457	6.24784e+16	1243449324491623	2.62183e+16
UTRN	1.09491e+16	6283178496430553	3377214835525788	6.19596e+06	3.66499e+07
PLAGL1	4786363514746686	5120156491399979	2.14842e+16	1.20657e-32	6.04419e-32
PEX3	6340950381025123	4867457573109829	2781271188611912	9537244327181784	1.52349e+16
AIG1	1.10454e+16	5870405272648724	3.54302e+16	2.64353e+07	1.62049e+08
HIVEP2	1.35335e+16	4231266961648135	4936776596735577	2.6291e+16	5.02768e+16
VTA1	1.00625e+16	606011842895375	3437869711181687	5576514242499239	6437992315971393
CITED2	-7102215435859165	7806975382887832	1722850216805611	3.31427e+10	119182506342866
ABRACL	-1.03027e+16	5652962235665494	1973679238067968	8.88738e+09	3.51765e+11
CCDC28A	1.90188e+16	4620086911847581	2.30734e+16	6309798280035457	7074388279697036
NHSL1	-918656569976962	5220283307206451	1.05816e+16	1.14218e+16	3.06943e+16
ENSSSCG00000004150	-2.15542e+16	5492694709818795	4.97569e+16	4805702917780585	5722222304328526
BCLAF1	-1.47114e+16	7.53799e+16	1601836206854311	2.05643e+16	2.89799e+16
MTFR2	6150962884656754	4329163945350839	99990753226571	1.5311e-07	2.79699e-06
AHI1	1374028019708457	6102191857723926	6873652863965809	4070619928088237	5031967414478846
HBS1L	-8664756006045888	6123264694858342	2310749538618369	1.53192e+10	6.7696e+09
RPS12	-1.61532e+16	1.19816e+16	21244716985662	1.44963e+16	2.16198e+16
STX7	3483944384440994	6147823683115681	3382624607352639	6588705508697511	1.10913e+16
ENPP1	-1.49758e+16	4827106649777779	1.64697e+16	4.94347e+11	1729270373634277
MED23	-4.11848e+16	5.20012e+16	209283950511446	1.47991e+16	2.19698e+16
PTPRK	-7877029427158593	7019006220438475	1.76749e+16	2.62067e+11	9.5981e+10
KIAA0408	-1.48507e+16	7765515033892887	9509487324541418	1.81476e-06	3.103e-05
ECHDC1	-2214153641361647	8517070146016174	143426228920259	4.74285e-17	1.328e-15
RNF146	-1.61319e+16	7684311261788032	1.28646e+16	8.10448e-16	1.90351e-12
NCOA7	2.63997e+16	5729961417073356	1.54159e+16	2.14382e+16	2.99462e+16
HDDC2	-2.11425e+16	544446359947504	7103422709759819	3993302096451941	4959336246842891
PKIB	1.00116e+16	7.47431e+16	1666642429484713	4.45628e+11	1.56912e+16
SERINC1	-5362431742619523	6517873637417494	8806335061990987	3001864065009457	7338144256515683
HSF2	-1851875488585571	585600935963237	8253550422760618	3636191150885838	4603209804438301
FAM184A	2.06925e+16	4551286377421042	2.19101e+16	2.85731e+10	1.21171e+11
ASF1A	-4.96531e+16	6185674299653542	6386551246433928	1.14988e+16	2.45033e+16
ENSSSCG00000004252	-3.5362e+16	5407920606551499	6947053189480448	0.0775647	0.924433
ENSSSCG00000004253	-1.0426e+16	7073565105301371	3349439140738224	7.14698e+06	4.20041e+08
ADGRB3	41898660828679	428495883759724	8089402376675595	0.000238153	0.0334876
LMBRD1	-1.14154e+16	5646087707367048	3.32735e+16	5640529516765362	6489341922764917
FAM135A	-1.67467e+16	5369576812039408	5221766205033989	4699146716727589	5631949298627533
SMAP1	-3.82643e+16	7258063037358955	7730361122472328	5429988802169846	1.24882e+16
SNX14	-5665701365960554	6036434954685743	8512057760628544	3528008835726062	8472506612238018
SYNCRIP	-7923999170475123	7.31008e+16	3.12559e+16	2.26164e+08	1.24906e+08
SMIM8	-5712949145879784	5968382678490977	9679073595762248	1.86379e+16	4.7879e+16
RARS2	-4.33039e+16	5414706392613734	3.54058e+16	5988439849122607	1022035568607244
SLC35A1	4843413828025578	6992017684388754	9550915951428784	7572868684429128	8167743314475958
ORC3	-6536422593234054	5489910508992284	7742633656511179	5393208613864626	1242142731038074
AKIRIN2	-1.10284e+16	6790480994363803	3.14596e+16	2.03638e+08	1.13344e+09
RNGTT	-1.48311e+16	5288759607021806	2939625358303246	587692362428742	6687282037077362
PM20D2	6268305759676669	5997497295338926	1.34738e+16	7135694815021485	7786602306657209
UBE2J1	7137964886225522	5310703724094793	1.07701e+16	1031522663396797	2803342121008538
ENSSSCG00000004324	-2871623248788899	6229773373882506	2.50256e+16	1.13662e+16	1767213348404853
CASP8AP2	1.53303e+16	5702897169082778	4.73532e+16	5927.98	48053.3
MAP3K7	-3.50599e+16	4808936051540818	1.30267e+16	2537258901316633	3445341820254606
UFL1	1.85245e+16	5.94545e+16	6331999065751024	4.26184e+16	5219044594318608
MMS22L	3445326278559355	4344759951525487	6070646917562231	6.62521	69.2999
FAXC	7385987272630075	5263996696882863	9920782124096306	7527823584023621	8128731024041673
CCNC	4533869054423117	6170736564867124	6843685688066437	7936264591117108	8451640683979887
SIM1	-1.15527e+16	7097932754147531	4249069275271182	71019.4	513969
ASCC3	1.76994e+16	5.54034e+16	8167835430462071	0.00160138	0.0022971
GRIK2	8461333574170381	4589294303612437	7.58027e+16	5901060571811696	1.34558e+16
HACE1	2.23983e+16	472404907102419	5153608765086712	4728273370492319	5654175466541729
SOBP	1.413e+16	5055524286191434	3.55318e+16	2.50915e+06	1.54254e+08
SEC63	-2.48913e+16	6.90845e+16	3.26424e+16	7080565978957143	1.17985e+16
SNX3	-9712640193989694	761388849697264	6406588724448907	4.23472e+16	519377286828537
ENSSSCG00000004387	-7086529469184552	6019214430539909	1489620202676902	1.13591e+16	3735119815612272
SESN1	-1308520144562199	618058605497522	5062952086751622	4767470449574518	5686201734127941
CEP57L1	1.95678e+16	442504355746154	2.42963e+16	8.25996e+08	3.79934e+10
AMD1	3075989420295132	6262526186387663	3.99734e+16	4.5572e+16	8080965113429726
GTF3C6	-9769847114057608	6773315796922945	4262853062396849	66186.9	480080
RPF2	-1.73847e+16	6.62119e+16	5.13482e+16	773.531	678.507
CDC40	-142550059746348	5789440062446746	4167733297640783	5185514968743143	6069646217521182
ENSSSCG00000004404	-9469580977260338	5.48908e+16	1.58092e+16	7.00608e+10	2.39845e+16
CD164	2552146530757869	7344239980520893	3.89449e+16	4.84446e+16	8510328202587848
SLC16A10	-1.40936e+16	7107264847795338	5473722946544105	137.772	12972
TRAF3IP2	-1.25566e+16	5097866591272939	1.59386e+16	6.54313e+09	2.24837e+16
FYN	-4780329846157441	6803153277129001	9433267948508728	2.13084e+16	5398246360953709
TUBE1	2467939727830741	4507756049484371	5789190804888311	27.6924	275.292
HDAC2	-6977077321876769	8334036394201341	3377426003551743	6.18924e+07	3.66439e+07
NT5DC1	1.63725e+16	4946027314803185	3700566587231941	1.17786e+07	7.4703e+06
TSPYL1	-1.99389e+16	6248737111268664	1302866911010506	2.5369e+16	3445341820254606
RWDD1	1.39597e+16	7478843524053646	1.10909e+16	2.9228e+16	3.85474e+16
RIPPLY2	7226008330685796	4777561860898983	5108687733032458	2380632009189052	4610272559021505
PGM3	-7748684224638736	6430644536130953	1.88893e+16	1.38527e+11	5.33475e+10
BCKDHB	-9712621108932472	5552214158796487	1492447868422948	1.11902e+16	3.68712e+16
TTK	5694592795137195	4805017876770357	1.81069e+16	2.83109e-25	1.10018e-23
HMGN3	1.49586e+16	9037297622699600	1.68079e+16	1.94819e+16	2.76612e+16
PHIP	4.59406e+16	7744624876267556	1.48866e+16	6996215219026304	7672264748485832
MYO6	-7789582804843894	6824922040848142	3393660049441749	9535454086866658	9672730834518116
COX7A2	-4.53176e+16	9906443568373794	2201083509178715	2.71116e+09	1.15739e+10
ENSSSCG00000004489	-8493617751550318	1.28171e+16	6400242208911055	12.4266	135.05
SETBP1	-2.10472e+16	7254458073303372	114442489413225	2.84719e+16	3779751375554353
SIGLEC15	-8641602476010851	5.20396e+16	1.07334e+16	1.05218e+16	2853875866052
HAUS1	1.0371e+16	659297931239551	3.61518e+16	1.82534e+07	1.13632e+08
ATP5F1A	-2918024894426042	922282922908615	9699816067935724	1.84286e+16	4741752647766751
SMAD2	-2.19944e+16	6295708164022011	1279235009287305	9099486811144608	9375761409816192
DYM	-7719851895239918	5289834061715062	1.10469e+16	739610568509551	8014843612106204
ACAA2	7933154581784886	4.76992e+16	4489940286846849	3409486855025614	6276666584675347
MBD1	6401451324949	571449722101817	1190769203126207	5590262026261366	160738834584699
CXXC1	1.04338e+16	6.07328e+16	3.45273e+16	4.20312e+06	2.53531e+06
SKA1	5382441592603703	4831490097953437	170893718412343	4.72033e-24	1.69088e-22
SMAD4	-4.11484e+16	6820408620518287	5925560445619382	8076763796943695	856853234050347
C18orf54	3011597445756306	4.46046e+16	3698318707460865	1.19152e+06	7.542e+06
TCF4	2.23501e+16	7625303743019614	2.90657e+16	8821945378444747	1.4252e+16
TXNL1	3679170798865954	6.95505e+16	9092992451608596	7629982613229183	8212766244086876
ONECUT2	-1213458280371993	4456772636835811	1469948180204117	2.25354e+16	3.11869e+16
NARS1	-8504673528832256	5955913592096894	1.25077e+16	4.0527e+16	1.19972e+16
SPG21	-4590361156750934	6.33228e+16	8387906352174905	3.77726e+16	9010332795385548
OAZ2	-2919021576054422	6816255569100275	3058834734363323	8029923602764504	1.31347e+16
ZNF609	-3.74502e+16	6821265271877172	6272211708630799	1.22646e+16	2.59369e+16
PCLAF	7283284313351758	8687482604004954	5.05429e+16	6.26187e-97	1.43397e-93
CSNK1G1	3.64568e+16	4664488753845883	9256874096947776	3359860620243196	431991704371353
HERC1	-4.75518e+16	6338231193097378	8831973174538987	2.95998e+16	7246812721620654
TPM1	2149742897599716	6874776082110466	1.56585e+16	2108108324644198	2955869358761994
ENSSSCG00000004572	1.45119e+16	538088173788161	3917021889844398	3.8842e+06	2.61887e+07
ENSSSCG00000004573	1.50579e+16	5313640934667495	4374551806839011	373972	276895
RORA	2.48975e+16	8306756569939186	2.94493e+16	8614751243954469	1.3963e+16
ANXA2	4.09041e+16	854790648451303	48536539929061	1.45297e-91	2.82317e-89
ENSSSCG00000004583	-196405434251585	7823483378345143	2354107960836153	1.24953e+16	1.9124e+16
MYO1E	-9206403665482880	7.05926e+16	3.11349e+16	2.407e+06	1.32251e+08
CCNB2	5165020187987478	5380861399927272	2.71037e+16	6.74472e-46	5.0879e-44
RNF111	-2.93326e+16	5653272163847928	1.60627e+16	2.05017e+16	2890433889606944
SLTM	-185545329860866	673876878789329	1.75309e+16	1.85489e+16	2657895601621216
ADAM10	298506144385442	5597414562152696	2.11292e+16	1.4606e+16	2.17546e+16
TCF12	-3379737201546788	7790284114063036	4628525423268076	3144457772344947	5861123033801104
MNS1	3592714833480216	6351327655718363	4214213631260293	4008664293609441	7228221442807575
TEX9	5169671365916093	5289708381406377	5442080557740718	1965724109565015	3904413803485629
RFX7	-1.85679e+16	5475320808116784	631274559526311	4268881822302353	5226669895856919
CCPG1	820600055061482	6680060620034584	3705183002902519	5427218855601175	6300801611825952
RAB27A	1.06937e+16	5278912638525386	1.46241e+16	7021540539979091	7688203200537215
ONECUT1	-1588934150779351	5557617312374351	2.37721e+16	1.08441e+10	4.8932e+08
FAM214A	1534473851942313	5.46934e+16	3.28215e+16	5667122174870237	6506282432456215
MYO5A	2840643430908257	7621072469320293	5681624497133562	1.71435e+16	3466541896609611
GNB5	-1.0017e+16	5790351115402264	1.9812e+16	6562426463545727	7306525175248342
MAPK6	-1098451481237183	5547068345303297	220023708608879	2.72314e+09	1.16096e+11
LEO1	-2.60474e+16	5673639232112551	1.35311e+16	2.44735e+16	3341324485260991
TMOD3	5873699465291734	5658519045882164	888785599748675	2870736351017064	705721317022837
LYSMD2	1025909302482908	4776327881144438	1.37369e+16	2102869574817435	6580575750966029
SCG3	1598979986965204	7153479716824568	1.18714e+16	2759062679519699	3687184222817905
TRPM7	-218174344133993	610753930945467	1.5773e+16	2091493204362145	2937711813005493
USP8	1.65147e+16	6086331620796912	8138352648144913	3669887774329834	4634886824700196
GABPB1	-3.80594e+16	5301433654058456	2.48558e+16	1148936856521331	1.78162e+16
GALK2	1520421775147795	5472305288713393	535597374571319	4642630663911911	5578813309033578
COPS2	-2.17898e+16	6173800644937129	1.64271e+16	1999535304839217	2827750413460313
SECISBP2L	-3.04241e+16	5210758869316641	15198161991968	2.17647e+16	3027890108724668
EID1	6699334589727859	7801868352363887	3430465669345088	4.71253e+06	2.82664e+08
MYEF2	3626666103901637	7115828210243356	5485399453871427	1.91759e+16	3824451424775829
C15orf48	-7040311573410423	919877763582748	1.08631e+16	9810139332871696	2.68585e+16
GATM	2.75053e+16	5093174707135225	1.21762e+16	2698284653003817	3621055084776156
SPG11	-1.54109e+16	4554693614670091	1.68229e+16	6816903253445618	7529712947647424
B2M	775065370615636	7905646709755099	3.32783e+16	798698	4.66416e+07
EIF3J	-2.56294e+16	738967472204103	3.13734e+16	7651858198425107	1263226435847111
WDR76	3334337791184511	4946349494603111	1.30381e+16	3.38185e-15	8.0912e-14
PDIA3	8432600930764774	7977750646013997	46070003007607	114102	89659.7
ENSSSCG00000004703	1698868288137672	4771373811179835	2.91885e+16	6.5668e+06	3.44851e+08
MAP1A	1.58674e+16	5083495513687669	3.95793e+16	5292700122927035	6172570605348882
TMEM62	-1.89134e+16	5130438721955299	3746468142332967	930834	5.98647e+07
UBR1	-7890954147163945	6462120339694781	250726055685881	6165643027325731	6947997028332616
TTBK2	-3961295043908772	5088408280764938	2.12601e+16	1448171928372065	2160464961545296
ZNF106	-1.03839e+16	5790328571881949	243383445960705	8.08142e+08	3.71989e+09
TMEM87A	-8273776478491489	57806050985387	8405928681432602	3739992903175621	8934737144248167
MGA	-2.15303e+16	5590925102685381	1073171894995764	3.0023e+16	3936759346495016
RTF1	-4940163317652903	722500629562249	1.49218e+16	1.12058e+16	3.68848e+16
NDUFAF1	-2.02962e+16	4770872234213294	3.0113e+16	5831748001361178	6652404943022215
OIP5	3.75708e+16	4355823111871541	3060280254227381	3.16636e+07	1.7162e+09
CHP1	6662441921003409	4993692628978134	5686342644317206	1.70975e+16	3458323759783736
INO80	-1.25086e+16	5047408906834855	1.6372e+16	6857547628707524	7565850247557643
SPINT1	-2.10871e+16	575886681553991	5846708624309804	206.72	207.432
ZFYVE19	-3834822541170691	5444143197178554	2.02343e+16	1.54889e+16	2.28415e+16
RAD51	3.74137e+16	4.76127e+16	9444217823690684	2.52357e-07	4.28073e-06
BAHD1	2804400588524839	4.69983e+16	8404211233353411	3592763571193073	4564454134830589
IVD	1.89903e+16	6.19431e+16	1395933189550773	3.26698e-17	8.7648e-16
ENSSSCG00000004782	5189053147648857	5232779427973546	2.90768e+16	3.38316e-50	2.78113e-47
SRP14	-6058997618244089	743918226318362	230199514328981	1.60329e+10	7.06064e+09
RASGRP1	-1.39989e+16	563565731381943	3.71679e+16	1.08382e+07	6.90117e+06
FAM98B	-6378888950009235	5.20624e+16	5711431058641294	1685479403725832	341354830596653
MEIS2	1.43095e+16	8545986039947822	4.43553e+16	27386.9	2.05146e+06
ACTC1	-5128513291299992	9536639693773988	1939530164810092	4.36032e-28	1.83937e-26
ENSSSCG00000004806	4843035739828478	4892819976049697	1.80618e+16	3.55224e-25	1.36389e-23
SCG5	1.6172e+16	9442272709808734	1.25784e+16	3.42825e-14	7.90716e-13
LRRC28	4.3263e+16	5366120346414392	1826352241156492	1.76559e+16	2551490567682922
SELENOS	-2611937849206649	5827345226722097	1.46902e+16	2.255e+16	3.11954e+16
CACHD1	-2885654772036545	4367003538206322	3.28637e+16	5664628669568174	65045843533795
UBE3A	-5186877370686995	7226733619616332	1.65054e+16	4.85122e+10	1.70164e+16
NDN	1.05865e+16	6341794340100982	3.30977e+16	5650842076308654	6493941339763982
MPHOSPH10	-933829644608906	5518821016875829	1.35168e+16	2.36443e+16	7333293556352534
FAM189A1	6689369899824157	6.13453e+16	1.55351e+16	6934735093622906	7621789753224215
TJP1	610860188825452	5.20653e+16	4177615681576974	8380470529478456	8830248484575444
ZNF516	-7215092333553835	5456786294121852	5.97015e+16	1.455e+16	3008533439539887
TSHZ1	1.59254e+16	6159147527826877	9964756009931848	1.82079e-07	3.28871e-06
CNDP2	2.2759e+16	5811031950201585	1535800334793942	2.15244e+16	3002272208706598
FBXO15	7918521026221429	5164405623966529	1.1641e+16	6451440378503934	1.832e+16
CYB5A	-1.47663e+16	7381026129266023	1.18789e+16	2.75756e+16	3.68594e+16
VPS4B	-2.1855e+16	6.36475e+16	1.45465e+16	2.27783e+16	3147726652328003
RELCH	520528250427453	5515322506065993	5277265660668107	9816723685356228	9862869362347876
RNF152	1869116973858373	5412434526514821	650842178086845	0.717645	7.93369
LMAN1	7959009478078299	7195478805406543	4.54072e+16	16004.9	123494
ENSSSCG00000004912	1.23343e+16	7950714944628896	1.20227e+16	5.64163e-13	1.22624e-10
NEDD4L	-4.39101e+16	6043402796896796	4466807166458063	3.45595e+16	6353084929943972
ATP8B1	-1464965371367349	5.35172e+16	2.45971e+16	6199264572476921	6974852507233202
CLPX	-2.07124e+16	5301694320386005	7811706288566409	3767833588407311	4.7362e+16
HACD3	5393635246327999	7036915909771982	2155356438958925	3.44083e+10	1.44012e+10
INTS14	3.07272e+16	6165469865304502	2.00735e+16	8873320663545099	9209409532963932
MEGF11	-3.05239e+16	5.64063e+16	9518342778163596	1.73537e-06	2.98316e-05
TIPIN	1.275e+16	5281429693713885	3205039377033703	1.50225e+08	8.51671e+07
MAP2K1	-6615121414667549	5565948988919651	7867597621520694	7790997694742521	833730901256842
RPL4	-3134453332473537	7177591400860514	4.59695e+16	3.20288e+16	5954449947317442
ZWILCH	2.30133e+16	5084188060511105	9408932814261334	3.01601e-07	5.06248e-06
AAGAB	4.07177e+16	5566807345441057	418923237634413	4068151379828067	7318508321236247
C15orf61	1.06882e+16	605499119111121	4388002282227881	349134	2.59403e+06
MAP2K5	-5926379344648235	5512474570868947	708250238424597	7784023379075484	1721559196967826
PIAS1	1.83812e+16	6710679540174452	1.58899e+16	2074709263109363	2.91828e+16
ENSSSCG00000004963	-2003344200631235	730586518914383	2.74468e+16	9757875100308976	1552543303801021
KIF23	4413943095773862	593508483962113	2.38996e+16	6.51227e-39	3.86636e-36
RPLP1	2.51701e+16	1.25914e+16	5353288489215302	8170260130418019	8651974889552492
UACA	2.38954e+16	4968314419228959	8652503777192937	3.52274e+16	4487044354950691
LRRC49	-4865602162329281	6252828982556752	6094537015163036	1.356e+16	2827545020332327
ENSSSCG00000004983	6982455256555045	5086507275156511	6456738303975115	1.10532e+16	2.36008e+16
GEMIN2	2.02581e+16	5701086837039392	7886936486658058	3.74495e+16	4712057882343272
TRAPPC6B	-2.05511e+16	610250620184928	1.47111e+16	2.25171e+16	3.11862e+16
FBXO33	-1.04895e+16	5808702137094598	1.62703e+16	9678248482440808	9763519394180376
KLHL28	-7254742467781079	6006696429248476	8816484760346587	298521201381892	7305793676567525
MIS18BP1	1.2752e+16	5406074195270948	2.79557e+16	1.24123e+09	6.34669e+08
FANCM	1922253185126117	4446043485934851	1871315563711473	1.51931e+11	5.80214e+11
RPL36AL	-4.44398e+16	8815275975342947	1.26695e+16	3716750581767127	1.10717e+16
DNAAF2	7453126082470449	5205225193301132	1.09902e+16	915936910587074	2528190904298028
KLHDC2	-2698167059159834	6809332671243301	2687420901163877	1.01143e+16	1597761800416812
NEMF	-6307005621110996	6514091507722371	1.48587e+16	6998894883526854	767257890120947
ARF6	3378560587443772	6835199868852338	7299664330228233	6896749394592818	1544062748538029
NIN	6152321643334393	5758262507416581	5887633352700075	1.52476e+16	3.13257e+16
RTRAF	-1.24565e+16	862801680330695	9435928967671864	2.63149e-07	4.45201e-07
GPR137C	9305864499771280	4747181785134343	1.13831e+16	7411606916168639	2.07979e+16
ERO1A	1.4385e+16	4.90578e+16	3.01422e+16	4.01493e+08	2.15609e+09
PSMC6	-4903429128115942	8045994269023135	1.73678e+16	3.07999e+10	1.11513e+16
GNPNAT1	-1.64985e+16	6020386377653777	9062533428613246	3411104753596058	4376115343981462
FERMT2	-4.78065e+16	6.32548e+16	6239034924461894	1.24965e+16	2633390697264796
CDKN3	4737299569489652	679285244812777	3217441393323407	6.03939e-57	5.77979e-55
MAPK1IP1L	-5463484787760801	6.66497e+16	1.44588e+16	1.43257e+16	4604322580880645
DLGAP5	5.56804e+16	5.74062e+16	4.16011e+16	1.80153e-77	2.68638e-75
FBXO34	-1.18862e+16	473299083107412	5805401589346738	1.5977e+16	3261529548795933
KTN1	4.28731e+16	7412186609432025	7737018128849726	78089340836384	835350105844001
EXOC5	-5239945112899173	6.02916e+16	4498383413868398	3392691286772389	6251131187007057
CCDC198	5766837819457696	5343743853537948	7045194010982136	7947821536416075	1.75427e+16
PSMA3	-2747942456943406	793158399259155	5309329322259963	2.12115e+16	4172032802216283
ARID4A	7531509426258887	6309690041567277	2621230481076254	3.05867e+08	1.49369e+10
DAAM1	-4589669280735186	6624192703704771	1.01783e+16	1.42102e+16	3.73732e+16
PCNX4	9401411758497868	5591940632709229	2.03504e+16	6.4481e+09	2.60196e+10
DHRS7	6023098091741104	518996115219078	467632268599268	3058114479163809	5725147457050612
PPM1A	982256795162518	6234689081124595	3.78626e+16	5383396692752781	6256722783021721
MNAT1	-6380876455290496	5793611747535129	7954793170975995	4796018942168321	1115417970880786
ENSSSCG00000005094	-370453982140962	6139117993340011	4624566239637786	3.15172e+16	5872440592569379
HIF1A	3356872627198437	6385700100404229	4260732595520986	3900309762924814	7050686833908629
AEN	-1.65456e+16	6400684421450682	728433057035091	0.0140363	1.73078
ENSSSCG00000005103	-2425604822350317	53760482740548	1.15e+16	2.8355e+16	3768691237307609
MRPL46	-3287682128408266	5.38349e+16	2064622053106208	1507522995317551	2.23394e+16
SYNE2	1566452564819596	7532089848400433	1.36901e+16	1.26768e-15	3.2384e-14
IFT74	6271838694786311	5498350111263918	4491108759301007	3407157289088	6274179361755387
PLAA	-901454523472033	5622178959564424	1.88528e+16	9653668956110534	9749198305507852
MLLT3	1.9133e+16	5706822646491074	9040754646797052	3.41691e+16	4380096867948076
SLC24A2	1.20491e+16	4988368926164073	1.51835e+16	9.75546e+10	3259615650810321
RPS6	-3030320271062869	1122498690198349	7837301960843083	5117893678390828	1.18341e+16
DENND4C	-9843446389067484	6073610662653251	1.50186e+16	6983576149015343	7661024853291082
RRAGA	-7024298675025832	6324826013540075	1.83078e+16	1.87938e+11	7.06364e+09
SH3GL2	3.20852e+16	5298717884500686	1.29225e+16	2.55634e+16	3.46581e+16
CNTLN	1.25258e+16	6077120993217086	2.81914e+16	1.09889e+09	5.64591e+08
PSIP1	5050717500286225	809724007097911	1972328550773294	8.95041e+08	3.53823e+10
SNAPC3	-1.73315e+16	5421084801921864	431650882800579	50310.4	369097
NFIB	-3.6185e+16	6276761168263337	3689007336861099	5477220458590964	9460429720347066
MPDZ	1094645656602663	5345767760965229	2548072363937949	4.46825e+08	2.1254e+10
PTPRD	2.00851e+16	4746102425861083	2.97228e+16	4.98448e+08	2.65012e+09
UHRF2	5080052115353912	5927128510525222	8782429078877623	3041459168334255	7426441807829109
RANBP6	-3196203482956926	6005368350140211	19997331742775	1.57327e+16	2.31212e+16
KIAA2026	2.28709e+16	5.74864e+16	110210289415593	2.93805e+16	3868332868811595
PLGRKT	9112698417254782	5646310567769541	2195375023182202	2.79301e+09	1.18837e+10
CDC37L1	2.35366e+16	5703460186914114	1481373575755084	2.2356e+16	3100724713863694
GLIS3	-1.35508e+16	6636553699773358	4.52941e+16	169561	130519
RFX3	-1.5109e+16	8523108311392244	8807347547951943	6.30677e-06	9.91152e-05
VLDLR	1.86069e+16	461700293221964	3.21154e+16	1.45282e+08	8.24377e+07
SMARCA2	3.36465e+16	546555506482744	2.20559e+16	1.37511e+16	2.0706e+16
PGM5	9832014097201228	424564118440981	212337027994465	1.45067e+16	2.16268e+16
PTAR1	-1.41636e+16	5852672187171449	4001660643656017	251813	1.73243e+06
ENSSSCG00000005255	3486358718821366	7133766418799846	5.3409e+16	2083077152320899	4111640659110955
OSTF1	11805228842718	5489358958004193	1.55021e+16	8.2414e+10	2787122048155177
VPS13A	-9575726865219658	6239834517697597	2108208661417037	4.40022e+09	1.81559e+11
CEP78	2.12544e+16	4.93037e+16	6867107638244028	1.16335	13.5625
TLE1	7488481987584589	503359920693861	7492764303187261	619473901097823	140256590884154
DNAJB5	2244698307610771	512400868152785	5770932106470728	4474539503874854	5422403662214305
VCP	4.90702e+16	7300315744005556	1.63371e+16	6860713792825605	7567238309294024
ARHGEF39	5167269071896342	5.21504e+16	3134931434047342	3.78687e-55	3.51905e-52
TLN1	1.5177e+16	5395736375837856	4763772483309223	4.90068e+16	5810494085542816
CREB3	-1.27994e+16	6046861940903544	3812269386651579	9507670361670052	9651687820291038
RNF38	-9373348309009316	5432956376686945	1.34787e+16	2412817977743049	745949318866366
MELK	5934311649172104	4263016645107037	1.00462e+16	1.20692e-07	2.22379e-07
ZCCHC7	-4997007991846329	512901310741104	3.73107e+16	5340930760383311	9255688658264268
GRHPR	4043711934241901	5981212321081011	4.28208e+16	3851620986251615	6972499651000948
EXOSC3	-5447304239178875	4909180690318735	2.58017e+16	1.0821e+16	1692158626471616
IGFBPL1	-2034376163056771	7973559227173619	3141062417914754	2.08835e+07	1.15735e+09
NCBP1	-1.3617e+16	6079007261478051	3635369609306139	1.64567e+07	1.02947e+08
TSTD2	-810160165036368	4.99648e+16	8059360829653262	4526915096867493	1.06053e+16
XPA	-8861255554193386	6429795638300489	2.92686e+16	6.30091e+07	3.31431e+08
NANS	7318609094180225	8620417657305262	3839055346935396	579120	382029
TGFBR1	-4806584945562004	5593251142999445	4841035337593013	2.77902e+16	5.2688e+16
ALG2	-5.15651e+16	5584690037796162	5.76763e+16	8102069981576753	8592536010894829
RNF20	-6100613315756953	5543188543858125	5978894619530612	1.44781e+16	2.99636e+16
SMC2	41474809321462	7690858483499421	8021239807044077	1.86325e-161	1.19471e-157
NIPSNAP3B	-1945679168066942	6.8405e+16	1.70116e+16	1.92137e+16	2.73531e+16
SLC44A1	1.36932e+16	5140996685658992	2762794196296312	5991502513720938	678634766260001
FSD1L	9891226676372204	6688791328230196	5436037918994394	4609430237687352	5545999184612476
RAD23B	-2.10575e+16	747072680339759	258392448632517	1.07954e+16	1.69049e+16
ENSSSCG00000005440	2.32366e+16	5356358860368511	1.1051e+16	2931498539275895	3.86288e+16
TMEM245	-2.06297e+16	6234150364973364	1.40153e+16	2.36468e+16	3.24884e+16
EPB41L4B	4.23056e+16	5.05544e+16	2.48276e+16	1150998337371887	1783687370789343
TXN	1.37435e+16	990635479921871	2.27126e+16	2.52377e-35	1.40717e-33
ECPAS	2.48803e+16	5358261208599068	1.14567e+16	284456552862404	3778610766425802
PTBP3	7561977523044854	6521546525482724	2.26358e+16	1.95806e+10	8.48889e+09
HSDL2	3.05506e+16	5.1417e+16	1.66407e+16	1.97054e+16	279414595980432
ENSSSCG00000005478	9425188996264584	6069580006883754	3460982203938174	4.02868e+07	2.43468e+08
RGS3	8279243109009463	5.54315e+16	1.67196e+16	4.33302e+10	1.52824e+16
ZNF618	-9138736536377006	7186074512664826	4511329728423668	185958	1.42287e+06
AMBP	-8928875139423121	6097558118299389	1.55514e+16	8.02923e+10	271967284743813
KIF12	-8965750115657134	5846041499841336	1.35472e+16	7128244705511565	7782445947852912
COL27A1	-2688418993033083	4587588460840067	6052837973961811	4365690899755621	5318565322287021
MEGF9	-5895623153426067	4744331438985671	1938287140704098	8892744231491951	9226581879017216
PSMD5	2480311445596119	5418756394878998	1.39028e+16	2383583630469257	3270605229738685
ENSSSCG00000005508	-3660722167116158	5485913099761712	2420590217358786	1.1975e+16	1842216280113264
PHF19	1.88083e+16	4516705967393119	1.59163e+16	6.62044e+10	2.2725e+16
RAB14	-6086685874123339	4667485548264286	3.65788e+16	5580458641549715	9618790540219564
ENSSSCG00000005518	-5232044671150349	4909265410115262	2193741074978721	1.38572e+16	2.08427e+16
DAB2IP	-1435188749379741	4611455232671525	1.09663e+16	7405284495395327	8022078760681675
NDUFA8	-3275544855485801	7752270140017651	6676684929058078	9768212805761748	2.11386e+16
RC3H2	-312155297001296	5546995975283643	2103630265470332	1.4695e+16	2185111535150594
STRBP	3946570448006107	6376720639835634	6691939490371272	968497839493981	2.09798e+16
DENND1A	1.19127e+16	4800971083465521	1.06582e+16	1095865680898999	2957361425052349
PSMB7	-1.47085e+16	8183981822448233	1.89255e+16	1.68914e+16	2.45429e+16
ARPC5L	2.85356e+16	6807435354044408	5023339788941962	2.50079e+16	481244259495928
RABEPK	1264130431064005	5581040027959189	1.98917e+16	8.19557e+08	3.266e+10
PPP6C	-4798662617281693	5745993023335243	3703808599083093	5428841577144976	9390270351403718
HSPA5	7205150509922136	5915829610476179	9264157428937328	2.33682e+16	5.85758e+16
GAPVD1	2688321878318715	5289750205447958	1277627783120879	2583405752265853	3493209127694781
PBX3	-4.53511e+16	5869952019098502	4903726206659714	2.67988e+16	5114106225977914
SLC2A8	-2.58135e+16	4774606331923082	2.60765e+16	3.28155e+08	1.59525e+10
STXBP1	-3.61714e+16	6040728207429737	4072584060197198	4358455115313823	778313721284012
CDK9	-1.35157e+16	6277508421161321	7207405024440021	3959011183172521	4.92805e+16
AK1	5660791020855637	5933767392900204	1.08081e+16	1010552805254401	275261877115175
ST6GALNAC4	-1.75107e+16	6018957272427728	5702542914827796	430.213	4192.29
FAM102A	7123643736739714	5662684702295341	9988282903010416	7519702891064778	8123981152123279
CIZ1	4.42726e+16	5536423403589215	4854719334091186	2.75706e+16	5.2318e+16
ENSSSCG00000005643	9435884466633508	6502783926250506	2635808515645266	959054494494598	9717853063684200
TRUB2	504706397747524	5380886726930168	4714986417671987	299008018285489	561251654587156
SLC27A4	6169772963518607	6492799463107646	1.71264e+16	3.49734e+11	1.25349e+16
URM1	-3765153855887204	5963325757060243	2.06787e+16	1504319023564335	2.23022e+16
ODF2	1.22197e+16	5247971864374632	278397527695927	1.3179e+08	6.69603e+07
GLE1	452009197285225	4.86195e+16	2.26263e+16	8804330683381776	9158560730344572
SPTAN1	7122185437088123	5892932035585885	9707462167473856	1835212749411986	4723959915387256
WDR34	1.1253e+16	6357657354533519	6135574690907773	4.76399	50.2413
ENSSSCG00000005656	5896366588007174	846813894311831	2.99055e+16	5844756640163856	6662503035863226
ZER1	-3742870449877606	5711037520263229	3269641590631297	7057304045181463	1.17689e+16
SPOUT1	1.0518e+16	4908174647550424	1.18912e+16	5640102941941858	1.62099e+16
SH3GLB2	-1573703517576534	4856431843147704	2.4535e+16	6203685537258182	6978602046473591
CRAT	1.14757e+16	5013368182507596	9923086388594684	1.63218e+16	4236693524665425
PTPA	4.55271e+16	5255139789213927	2.78337e+16	9524765312257594	1521873789738243
FNBP1	-3216876450452896	6017243422278581	3.29762e+16	8559017840742903	896592425989928
FUBP3	-3.198e+16	5465102968475507	1.97903e+16	1.59492e+16	2.34019e+16
EXOSC2	3612094695667887	4900038759549157	1.76321e+16	1.84225e+16	2.64143e+16
PRRC2B	-1.73368e+16	6072351400791821	5361485769307563	4640332786328739	5577097249473266
MED27	-6332007716348121	6459257949535382	1514132376759911	9.97557e+10	3.32277e+16
BRD3	-7810367839455742	6918433159257473	3320881167975914	8.27746e+06	4.82501e+08
CAMSAP1	5500899721423078	5144378323680639	3.4127e+16	6469660571572956	1.09167e+16
MRPS2	-2.50566e+16	5853381174096363	1.5079e+16	9022683012142602	931617447244096
ENSSSCG00000005768	7892440559615779	6942267329283227	4.12191e+16	1.36088e+06	959952
HDHD2	1.89273e+16	5567682039648531	6.6639e+09	9934867222120282	9951324760328092
TXNL4A	-2.01716e+16	677633873911355	2.18255e+16	1.39583e+16	2.09701e+16
TM2D3	-1.79549e+16	5127760221413564	4.73993e+16	4.91156e+16	5820167599374746
SNRPA1	3.73071e+16	6589747378458749	511066035290313	2.37793e+16	4606424913878842
MAMDC4	-4.17161e+16	8183315999055004	9546352550264828	2.00347e+16	5105826132884296
FBXW5	-4009484923619535	5207066194598494	2632014152710667	1.04729e+16	1647095791949801
TMEM141	-1.27955e+16	6824441478731409	8007715433968194	0.00360072	0.00498656
ARHGAP39	-2.42059e+16	659296530481625	2062263691308713	1.50986e+16	2236707743909372
LRRC24	-782759178202348	546175620643558	1.1306e+16	7725875616385663	2.15947e+16
GPT	5782711792208125	5550994771280998	7660436490817236	5644484732577843	1292587003760326
VPS28	-1.45472e+16	8188686542902623	1.4596e+16	2.26994e+16	3138169469895799
ADCK5	-2.4146e+16	5256072843801348	871894077682903	3.50431e+16	4471575436087944
ENSSSCG00000005908	3.83274e+16	5.36006e+16	3181242941770554	744880482698085	1.23256e+16
FBXL6	7745343612524389	4943993662710132	5722062691692058	1.6753e+16	3396158052495716
GPAA1	7471791046464075	6.62867e+16	2.37707e+16	1.08524e+10	4.89351e+09
SHARPIN	-4234140273652294	5451016518810117	2.48049e+16	1.15266e+16	1785663494955414
HSF1	2.20743e+16	5.37159e+16	1.03655e+16	3086262343392585	4.02381e+16
DGAT1	1.61399e+16	4763680229731809	3094259527739685	2.65774e+08	1.45157e+09
MROH1	-1194306312860701	5641108659512472	2822997975322903	1.07723e+08	5.5435e+08
EXOSC4	2.12196e+16	5434251306993742	7702131732538611	3801511135546076	4774787345959146
CHRAC1	2770192199190816	7210705156941702	3.66785e+16	5547153562874224	9566527338663132
TRAPPC9	-4740485444433592	5612162146857007	3056159412956294	8043157142191812	1314959806112542
AGO2	-1.1725e+16	6023243463894258	3021355488460138	5825467105681614	664760546033645
NDRG1	-1.15601e+16	5379210554501042	2.01781e+16	7.05548e+10	2.82572e+11
PHF20L1	-6895969344668967	63598994264648	1.42826e+16	1.57313e+16	5023352431699481
EFR3A	3.98751e+16	5169904211980776	2.28644e+16	1.30509e+16	1982995883288174
ENSSSCG00000005959	-6103570090777511	5877431700063362	9980632964684412	1.58195e+16	4115002953588715
WASHC5	6648072415795652	4.76858e+16	3.59048e+16	5.81115e+16	9949557557146260
SQLE	6544984083240362	640954872065783	1.22307e+16	4701004810625237	1.37262e+16
MTSS1	2029555930672649	8332577731409774	1.33335e+16	7.63851e-16	1.86229e-13
NDUFB9	2577535034052486	8084914109312544	4561494455517087	3.26985e+16	6054373892422412
ENSSSCG00000005982	7080728696798193	5338521820466164	1.09752e+16	9234103076898380	254443785685743
ATAD2	5553401301119209	6553987443298547	6447808939560781	3.04909e-126	1.39649e-124
MRPL13	9454670569628384	6566084240062837	3304355628985256	565402725356322	6494737146156819
ENPP2	2226976775713003	6830334549662919	2.31939e+16	2.25123e-36	1.28883e-34
MAL2	1.37086e+16	4825665891173995	2.19369e+16	2.81762e+09	1.19646e+11
EXT1	-3366620607013253	665539801109986	2.97954e+16	8629553814238593	9026541444844676
SLC30A8	3.77759e+16	536757928386699	2.38737e+16	7.41548e-39	4.36221e-37
RAD21	1422977490710225	7871870013349126	1.43195e+16	5.32935e-17	1.48573e-16
EIF3H	-2.27688e+16	8034587795234387	2997117297960301	8341281110928865	135643658339528
TRPS1	9662435931729132	5579390359883731	2.52097e+16	5.14226e+08	2.42086e+10
SYBU	1.9566e+16	4697971820791656	4480608985000519	217545	165468
EBAG9	4633576523177655	5037711532624346	3003485601344762	8308558756080994	1.35283e+16
EMC2	-2.76029e+16	6664585914639385	2.89848e+16	8866287971348885	1.43128e+16
EIF3E	-139940397716569	7798435750252689	7530913609053638	3854992491327261	4825856043630402
OXR1	-4058244846682676	5722188193174143	4136631806889232	4.19646e+16	7516115887234161
LRP12	3.39878e+16	579539596600972	2.54201e+16	1.10853e+16	1.72774e+16
BAALC	-1947388925378232	4813309090341532	2.14822e+16	3.57133e+09	1.49182e+11
NCALD	1.12258e+16	5357519822298132	2.69401e+16	2.09855e+09	1.04309e+10
ENSSSCG00000006061	-4.15184e+16	8183058797784419	1.27795e+16	3.50447e+16	1.05003e+16
YWHAZ	-4513632129741197	8546228549258226	169273990824863	3.88369e+10	1.38269e+16
PABPC1	-3.02246e+16	8465642768928713	5760047410595176	1639462946450852	3332985546177192
ANKRD46	-3066683862145114	6.76873e+16	5245118325823383	2200843154697904	4.30369e+16
RNF19A	-2.99072e+16	6326580440730038	3248447355577058	714911489484795	1189108293275358
VPS13B	-6585701320891609	54152325967287	7816102872517315	5178273754479121	1.19608e+16
STK3	-2747622691715101	5619234391543219	5858327758088131	19.4866	1961.51
RIDA	-1.40258e+16	7289594850147382	5426581545083931	1751.22	16297.3
RPL30	-1388297767928305	1003901593948598	1.39274e+16	906056083228412	9346254191860646
LAPTM4B	-2.63629e+16	7676975613672816	3.17099e+16	7495714139670573	1.24e+16
MTDH	758291073570052	7279771945724355	3796495051528126	9508688702554348	9651687820291038
CPQ	1659063624291904	4590385338178998	1701164196270051	3.71513e+10	1.32578e+16
SDC2	-4.8573e+16	6993837357981131	5.50518e+16	8144950699234181	8633728530912477
MTERF3	1.01299e+16	804585844800756	5769104209691456	4475258917722723	5422403662214305
CCNE2	315306741638566	4877086397116822	9607348135750948	1.10698e-06	1.91836e-05
INTS8	-3025978090669581	5552138389758599	1.66695e+16	1.96667e+16	2789888853939797
DPY19L4	-579771866070389	5336716105858422	5.85753e+16	1.55106e+16	3.17946e+16
ESRP1	-1242264367735535	6626109533923831	5.91525e+16	145.915	1487.45
VIRMA	-2824585622724581	5326978052913194	1.53793e+16	2.14926e+16	2.99915e+16
GEM	9163462911241672	5417034007085973	1.95395e+16	9.85417e+08	3.8598e+09
CDH17	6809197103663255	5095086610571717	2911157686224854	8796870817600057	1.42151e+16
TMEM67	4.01114e+16	5112453405924927	2029555428836371	1542657270569837	2.27653e+16
RBM12B	3872907245988453	6208007869658994	3300442427366601	6926122601578052	1.15747e+16
RUNX1T1	-1.63622e+16	904675233358785	1.56963e+16	5.21357e-21	1.67147e-18
CALB1	4423394707464231	5471364632148661	2.74815e+16	1.01295e-46	7.82533e-45
DECR1	8701941877865548	558206514788277	1.80634e+16	2.13665e+11	7.95135e+09
NBN	3384862816636089	5267920718806613	2248598991014343	1.33735e+16	2.02626e+16
CPNE3	-5090287326565321	6424042980839319	9978696810373696	1583617259003959	4.11766e+16
RMDN1	-2.47194e+16	5569878315486229	1.39598e+16	2.37398e+16	3258817128651163
WWP1	2484915159626375	4936146390299363	5684816401050803	4.50863e+16	5456451068562274
E2F5	-1707258542508785	5152363981042403	3122713761112055	2.29535e+08	1.26441e+09
LRRCC1	-9264563703736296	593518774561991	2.07053e+16	6490872011005443	7241947335056013
FABP5	-1.10587e+16	5.11412e+16	1.03403e+16	7477837660110048	8087012156624327
ZBTB10	-5943587226016652	5322045954561983	5.91817e+16	1.49855e+16	3084653351973431
ENSSSCG00000006156	-2162360198821379	9765894539452968	3.46261e+16	2.7633e-61	2.90464e-59
ZC2HC1A	-5134228587826878	6636817597398046	1.28664e+16	3.34535e+16	1.00706e+16
PKIA	-8517981858730219	6343874166806225	2.3745e+16	1.09979e+09	4.95214e+09
NDUFB8	1.43529e+16	8323830803249175	1.88948e+16	16926009323245	2457644288511027
ELOC	3218942205189032	7686460262030652	7225978322258907	71856001620282	1603691898326656
UBE2W	-3853669042662776	6139766943452034	5046757521997915	2.46721e+16	4753524422009371
STAU2	3.57091e+16	6074016582189791	4662606498176313	3.08264e+16	5766004359900977
TERF1	-7184058297296727	6459469428103744	1709875362888825	3.54856e+11	1.27043e+16
KCNB2	-1.58204e+16	8059026605220318	939146007283649	3.29435e-08	5.51524e-06
LACTB2	-1.11156e+16	5646095542459149	2512960302272045	5.36036e+08	2.518e+10
TRAM1	4500189791117894	6386332723221609	945959522681616	2.10047e+16	5329735039798918
NCOA2	2124097571303308	5763939663185136	1.10611e+16	2.92929e+16	3860756863544025
ARFGEF1	-5550375328243522	6816636008091452	1.17119e+16	621018489270069	1.76819e+16
CSPP1	7457677126055721	6176831516293172	1323935798723788	2741317857453743	8394140449853582
COPS5	-6951344613629576	6580521283851537	2.22586e+16	2.38285e+09	1.02337e+10
ARMC1	-6745761598437966	6046635698820504	1360889383269856	2.25116e+16	7020656400521072
CHD7	-1.15737e+16	7945421961397598	8140183896439609	0.00184186	0.00262445
RAB2A	-9655277758771372	8650847348205117	992793181416296	9206309244033458	9452498778661734
TOX	-1.37512e+16	8745397387131417	1.23573e+16	2.66296e+16	358716826271357
SDCBP	-96623530807872	8250044125711801	6405709733225241	0.120865	131.801
UBXN2B	-7988779722954408	5596308967590789	9377984031071732	2.19607e+16	5.54378e+16
PENK	2.21124e+16	4.22298e+16	2.99172e+16	8626782969826461	9025115418914548
LYN	-8435990036974749	4745315584518713	6558188562390621	1.04403e+16	2241893530944281
TMEM68	-7154838385114662	5730140535968711	1.13092e+16	7712197194637809	2.15753e+16
LYPLA1	-4.58182e+16	610552296948186	6.96526e+16	831072713579814	1826821473936842
TCEA1	1.01297e+16	712660338670796	6424371708078951	4.2283e+16	5186882796686174
ATP6V1H	-8105306892498078	5622626124311028	1.35764e+16	2290443465758119	7118915900359215
ST18	-1.6304e+16	5729962533837255	3743841646099734	94345.4	6.05548e+07
PCMTD1	-689013594932884	5.90243e+16	1.37302e+16	7109781485459424	7772876195185989
MCM4	2.87465e+16	5785001172418146	7702421027019128	0.0168875	0.0222346
PRKDC	1687414376542408	4514843217377322	1.93625e+16	6599166723757018	733469527348414
KIFAP3	7221219098216891	6147256746180016	2.08861e+16	4.87419e+09	1.99957e+11
SLC19A2	1901417129246842	4745928378998071	3.75299e+16	900233	5.8013e+06
NME7	-4.96654e+16	5.90062e+16	6850697619678263	8860666768425804	1.93444e+16
ATP1B1	-3174466936653521	9062794540577284	4.29427e+16	8358331303473856	8811841551771517
TIPRL	6423924135228939	5.66921e+16	1.04555e+16	1.22286e+16	3.25665e+16
DCAF6	-2218158266550859	5027326552265273	5175210324270179	4.71901e+16	564731166366064
MPZL1	-3690996470661634	7980777442619578	6768614148529817	9277484910665540	2.01788e+16
CD247	9180071267578524	4.92865e+16	1.12584e+16	7926223298571067	2212579181124845
POU2F1	2704526566035324	6379453099487737	3.34385e+16	6745654363785836	1.13156e+16
TADA1	6204447990681109	5331768985594763	5296773271026046	2136496746044095	4197064073417506
ENSSSCG00000006324	-6104518277208195	6590173343996193	1.51709e+16	9.82056e+09	3276244368598308
MGST3	-4.26597e+16	7646262984730863	1.17943e+16	594122244384398	1699157819354487
PBX1	-4.29607e+16	7297510704973229	8228085918623098	4124700901050049	9759255416063806
NUF2	4559263456190222	6253849177163627	3371981199235008	2.60062e-59	2.64686e-57
RGS4	-3.13204e+16	849813414858254	3914408817340372	4.01973e-71	5.36969e-70
ATF6	1.81588e+16	581755771341165	7930905632085672	3731672400922957	4.69996e+16
MPZ	-5163930207100552	4507458740974251	3.18004e+16	5728096545955987	6555158852876993
NDUFS2	-4775282744777704	6732343510909815	6663563497913813	9840394372764720	2.12733e+16
B4GALT3	-7510516946935288	5757701682143723	1.579e+16	6910975815385233	760725404271908
PPOX	2608749311132496	523569767309376	1.2419e+16	9112668223414624	9384906625206324
UFC1	-4.11623e+16	6103921801401281	5475217351583675	1928796202294254	3.84201e+16
PFDN2	-6682694402246997	8027647252372459	3421224445513581	4.9417e+06	2.95856e+06
F11R	-8733774632548903	5405765836762377	1.26508e+16	3754047655854218	1.11646e+16
TSTD1	9149160476157968	6318336831165965	2544285120645052	4.55683e+08	2.16593e+10
USF1	-9040239767195868	5.01077e+16	1.00523e+16	1.52156e+16	3972422530309885
NCSTN	-4693146192259249	5236439387293521	3.00763e+16	8287344100874851	1.34972e+16
COPA	2.45617e+16	5572342364222736	1.18059e+16	2.77236e+16	3.70033e+16
DCAF8	-8070259471455828	7292159528737905	2704692397005499	1.98576e+09	9.90871e+08
IGSF8	-1.36214e+16	5538867939699976	2.84747e+16	9.49322e+07	4.91684e+08
ENSSSCG00000006395	2.21641e+16	6375304820986075	1395793616441914	3.29002e-16	8.78984e-16
IGSF9	-7501121062266683	5606780977510714	5621503292339014	9810841610445456	9860415977846272
PRCC	-8071111111964948	5789761608304471	1.46622e+16	1285988813693498	4.17296e+16
HDGF	1.15146e+16	6854740505425098	892088913543145	3.55249e-05	5.66631e-05
MRPL24	-6332925312732222	6460945656783963	1.41688e+16	7066088910894169	7730380838876202
ISG20L2	3618818878702933	5183527246378246	2173437899873573	1404120248352842	2107988534872026
IQGAP3	5597918487828349	4783338115584435	1.78533e+16	1.0133e-24	3.84454e-24
NAXE	4566356588387629	6914080781886261	1.22388e+16	4680578387502101	1.36791e+16
CCT3	-2.38152e+16	8237188641818097	4491300665120039	3.40677e+16	6274179361755387
LMNA	-2834928723588928	7149020179596164	3.61411e+16	5729123828413753	9830115597481666
MEX3A	-2413970913768378	6731372359776958	1.37715e+16	8.41086e-17	2.17461e-15
LAMTOR2	5427807920306164	7505513394158818	2.05592e+16	6502444876068234	7251074181799916
SSR2	-3788177308301945	9629224744580676	1.01477e+16	1444787317059363	3.79205e+16
ARHGEF2	-2400782031216957	5846744563553036	6.22927e+16	2.96027	31.4259
ASH1L	5566876916786617	6767868962795726	1.91567e+16	1.20411e+11	4.67642e+11
ENSSSCG00000006510	-3.46216e+16	5502814889811049	2.64743e+16	8707472553297758	9081378336328112
RUSC1	-2.36575e+16	4.8064e+16	5336013147205527	4650967147816159	5585690457351041
SCAMP3	-4741622794116937	5160062691317171	3599354756496682	5780200177620342	990450121296142
MTX1	4917212522480375	5340049214769957	5222558819107319	2229572076812065	435058312736426
KRTCAP2	7053368508908907	8474615707174497	4.10121e+16	1.5129e+06	1.06135e+07
PMVK	3.34898e+16	5555128481112458	2816152844236834	9331983061163376	149629095744385
FLAD1	2272393040204072	7853352670516813	2.73476e+16	1.98348e-45	1.51406e-44
PBXIP1	-1.07684e+16	582403354132153	2564864479010147	6125443533811504	6919722328893475
UBE2Q1	2.24977e+16	5553456820331976	1.20977e+16	2713781087408717	3635818509681583
HAX1	-4477185064798515	6.08923e+16	4237606019938273	395378810650605	7135291117060735
UBAP2L	-2996509931368601	6334235578912523	3.70122e+16	8474402362862373	8902009821538915
C1orf43	4.51474e+16	6.25992e+16	6989386421276421	8199445713146842	1804215714231213
TPM3	8119596376196277	8040133159446505	4.67545e+16	8046.05	64328.3
ENSSSCG00000006559	-9728913222709304	6848530819378213	4.35953e+16	5090822214014789	5979547909189014
ENSSSCG00000006564	-3.06522e+16	6603660459431645	3435223886274846	6381993466825188	1.07972e+16
S100A11	-1660622675467558	7864317816836667	1100935563798573	9.34734e-11	1.921e-08
S100A10	6440509203806902	7930170979750491	8971368348795252	2.74243e+16	6778901201679873
CELF3	-1842762022541883	7007340278521419	1.24966e+16	5.17785e-15	1.17732e-11
SNX27	-1.69717e+16	5135710391213385	3.39457e+16	5601425504526647	6457450617588073
POGZ	-2.66058e+16	5563386614767017	1.55535e+16	2.12347e+16	2972710254414906
PSMD4	-3.24361e+16	6972161010581841	5773722792934096	1626753784298301	3312399258469579
SCNM1	403804826658834	5407974059803213	3.60477e+16	5761401364208609	9877568328156576
SEMA6C	6435121457054264	5.87701e+16	1.00203e+16	7515862754102988	8121286144136899
PRUNE1	7167294429072509	5.70936e+16	1.52802e+16	9.26833e+10	3108185368733949
MINDY1	2.38483e+16	6007064422299124	1063095862535068	3025101511072417	3.96018e+16
CERS2	-1.33032e+16	5870017458533005	5218106500921138	9424137281521444	9602346774052996
ADAMTSL4	2374346819844588	4837206319179488	3817582908222761	9507327813957246	9651687820291038
OTUD7B	-5652095901729718	5.18609e+16	5076640842333818	2.42503e+16	4683523598386281
SF3B4	1.15015e+16	668645850661396	5283396070521142	4673057607855956	5608018974653264
BOLA1	2.01161e+16	4.68613e+16	4635281619577114	4959796817153379	587190125398587
POLR3C	2.08088e+16	4633105077234942	1.98676e+16	6557918013149903	7302773584633063
ENSSSCG00000006694	7448581777129358	5213970762149944	8755955132344145	3.08593e+16	7520701133412844
PRKAB2	9465463519915920	496179322022882	1.45269e+16	1381693099652154	4.46543e+16
ENSSSCG00000006704	1.06434e+16	5085373247338221	1783451817690369	2.40972e+11	8.87995e+10
TENT5C	1.03289e+16	516069345787099	1.54907e+16	8.29115e+10	2.80247e+16
MAN1A2	1.39287e+16	480758536331789	2.1861e+16	2.93131e+10	1.23899e+11
ATP1A1	3683295879604535	6901457811440954	5705471507415007	1.69121e+16	3422994372854464
SIKE1	-8331971083974488	5.76817e+16	1.31424e+16	2.8869e+16	8793730770718772
CSDE1	-6093358143222468	8168826405508328	2.3829e+16	1.05282e+10	4.7708e+09
DENND2C	-3587423541136496	6998488493432783	6.74064e+16	9424056583675372	2.04768e+16
TRIM33	-6403203440178578	5.20389e+16	589381805666137	1.51941e+16	3.12259e+16
MAGI3	6496745147951495	5.54156e+16	6325849542430834	1.1899e+16	2.52805e+16
CAPZA1	-3.08468e+16	6.89413e+16	4.28458e+16	3845961445627806	6966502574588566
ENSSSCG00000006777	-4.64038e+16	4755644590854137	1.53175e+16	2.1585e+16	3008112290959376
ST7L	1588358453293346	5834451004398326	4.52702e+16	5010546597883261	5911246510695026
RAP1A	9642394411029124	7040142985850254	3.86733e+16	5340214417595761	6217805492214277
WDR77	-1.13937e+16	5886330803270485	2524697078022551	5.04387e+08	2.37979e+09
RBM15	6404586772972914	5487752227593323	8875970645806019	2.88949e+16	7095895228336796
AHCYL1	5694410402805373	6022721208358088	6.336e+16	1183112291411957	2516959526388012
GSTM3	1.35987e+16	7008365930887826	1.00981e+16	9.28563e-09	1.7308e-06
GNAI3	-4.5573e+16	6.94245e+16	1.06022e+16	1129530861884808	3039258030384133
CYB561D1	-7534724179592608	4970172627335622	6890862964500968	8663743317545726	1.89468e+16
SYPL2	-1061700072534414	5302244715521664	1.67862e+16	4.18356e+10	1.48123e+16
PSMA5	-4.09519e+16	729816500852134	1022964999851569	1.38201e+16	3639195391951622
SORT1	3009106948065986	6289343996171142	3241796795500237	7178187492806283	1.19332e+16
SARS1	1.94108e+16	6407320845217555	1.05247e+16	3.04938e+16	3986966582007244
ELAPOR1	-1.56122e+16	7013156878509749	7913494288792567	0.000580092	0.00784715
CLCC1	-1.1611e+16	5091736364631744	1.58862e+16	6.72687e+10	2.30533e+16
STXBP3	-2602953295566951	5326608191446127	1.31044e+16	2523145993217186	3430015650499899
CDC14A	-9508244088614020	5114955071162414	9648251908536478	1.89532e+16	4853347919588182
RTCA	-1.06053e+16	5696502985706531	2.33357e+16	1.36054e+09	6.03723e+09
DBT	-1.12221e+16	5458993017015375	2002352769514524	7.64952e+09	3.0579e+10
TRMT13	-2.01922e+16	5732357963507087	5.31603e+16	30.7405	27761.7
MFSD14A	3.32715e+16	596962750551551	3.66351e+16	5.56164e+16	9588937071042718
AGL	4918044373203917	4657917566589766	276573359469322	9630253005675768	1.53414e+16
DPYD	-1.47841e+16	7656263552386224	662502053414034	4.15678e+16	5115791574785312
PTBP2	-569681715840298	7712854661140663	1.26765e+16	3702751261941402	1103767600723769
ALG14	5066060878592225	556687000389115	5185743994231615	2.27729e+16	4.42887e+16
CNN3	-1.12836e+16	7882598956740205	683892418661204	1.34208	15.5895
SLC44A3	-1.16777e+16	4800108316482568	9711347632788848	1.83134e+16	4715875938515279
FNBP1L	-9598865082276286	7069306385249454	412688909905321	1.32664e+06	936826
CCDC18	7559558749502978	5061678787668513	8215560166191857	4153269211166106	9823224707486932
MTF2	-625343759757758	7536489332502934	2391471463469141	1.00699e+10	4.57606e+08
RPL5	-1.24802e+16	6851280352473704	4.39469e+16	5073788595957508	5965567627307599
RPAP2	-4.17872e+16	574362180273101	3.32131e+16	6838743144284466	1145456594432359
GLMN	1.45086e+16	5247640481209883	3.55861e+16	5508137023709305	6376272719989902
LRRC8C	1.23889e+16	4513115037030716	7199916313069345	7290698070205734	1.62432e+16
KYAT3	-1.97066e+16	5348334009393734	7423521813199585	3.88908e+16	4.86098e+16
GTF2B	-6729320189878477	6218385602175458	1.02241e+16	1.38616e+16	364863916461873
PKN2	-1.22808e+16	6689277848194902	3.45908e+16	4.06831e+06	2.45631e+08
SH3GLB1	-1.96365e+16	6150807682386281	1.23503e+16	2664318077262428	3587328633558778
ZNHIT6	4554280391362816	5280922197586542	1882144168436847	1.70091e+16	2.46914e+16
CCN1	-1.93882e+16	4958476652358342	1905909351295991	1.26732e+11	4.89818e+11
EEF1D	6.34995e+16	8674484902657499	1.85582e+16	9656383896786900	9749198305507852
ENSSSCG00000006959	3314504049480969	5.37621e+16	2.27093e+16	1.31821e+16	2.00103e+16
TRMT9B	2.33389e+16	4238025528708321	3.29174e+16	9.61592e+06	5.55972e+08
DLC1	2437407209594817	5059728870566923	9770691524709316	4.85125e-08	8.49897e-07
MICU3	7809029635887038	5.09953e+16	1.0236e+16	1.37729e+16	3628256472506385
ZDHHC2	1.41672e+16	580635596794329	3.19372e+16	571985029033108	6549228582429086
CNOT7	-5386802858892387	760879345499449	1711069881501511	3.52631e+11	1263167567748809
VPS37A	-1.67527e+16	6988625007472758	9090144553363324	1.51009e-06	0.000245754
SLC7A2	7104147706032281	6810700758329801	1.2831e+16	3.40923e+16	1.02437e+16
PCM1	313964978669867	7249323974609038	7234985869611629	7149637300240299	1.59678e+16
ASAH1	2.84466e+16	5234545001130636	8314811339079853	9273451268744012	9494071456999296
FRG1	-6787832537155923	5920241467175581	5580963749633494	1.81567e+16	3646130356161606
INTS10	-2184298529665917	4821937027015335	2.99999e+16	5838828868840881	6658113232617415
GPAT4	1171090622333589	5.53437e+16	3.25378e+16	5683936885277973	6517418331259364
ENSSSCG00000007023	-2390820702559966	4957405144538792	5026211842352595	4.78351e+16	5703206399054155
VDAC3	1.71403e+16	7060976240710796	1817931248261731	1.7756e+16	2564218347605315
POLB	-9146578765979598	6527290059685779	2.59296e+16	3.54103e+09	1.71149e+10
PSD3	-9411882708901276	5039509619454599	1.11664e+16	8329364432248422	2314033134297092
PRNP	-1.4744e+16	714221859212315	884833355406478	925057061390877	9481243410547160
GPCPD1	-1.02746e+16	6168913394891643	2.79188e+16	1.26513e+09	6.45349e+08
TRMT6	-2.12491e+16	6260411302273629	899360514286343	2.45984e-05	3.953e-05
PLCB1	6856861048262662	5.19738e+16	5.01099e+16	2518694972301451	4.84545e+16
PLCB4	-3307264126193975	5746164723214398	2215411711647233	1366386058311465	2.0606e+16
MKKS	8536370320997505	6110781397001171	2.36969e+16	1.12764e+10	5.06332e+09
ESF1	-3278778945487783	6612010078742339	4593166563418794	3209965786131816	5963711956212991
FLRT3	1.47464e+16	4176586698781189	1.15562e+16	6752351116529033	1.91237e+16
PCSK2	3692166754419452	7193514046574853	3.71942e+16	7.0679e-68	8.39248e-66
DSTN	-2.3883e+16	923943636350682	6494740487410066	1081940882323644	2.31401e+16
ENSSSCG00000007088	4142628306991163	6777983982697599	7.61513e+16	578805471348585	1.32263e+16
MGME1	1.53481e+16	489640634692628	3.17524e+16	1.75133e+08	9.85049e+06
DZANK1	9274699914593780	5270211146197433	9399642696316572	2170277331807892	5485147123197557
POLR3F	-6428345231217105	5296752642066255	3.9672e+16	4.63947e+16	8208691449154455
SEC23B	-1.35698e+16	5911693582792936	5502297642684795	4.58224e+16	5524088966464097
ENSSSCG00000007098	-4957386431941334	6.44236e+16	8621945774387164	3.32137e+16	8051650588482716
KIZ	-1.30855e+16	5.05437e+16	1.64675e+16	6848878845277954	7558521713583862
XRN2	-770476326376815	6874829936574342	2.70298e+16	2.00346e+09	9.98924e+08
FOXA2	-9475062085285144	7.30465e+16	5249673802491662	430.964	38648.1
NXT1	7601862515919743	6140772692987593	2.01906e+16	7.00967e+09	2.81088e+11
PANK2	1311664540157386	5338459262048992	3.00111e+16	5838129001989709	6658113232617415
CDC25B	2.03534e+16	4.29177e+16	2.09482e+16	4.7186e+09	1.93822e+11
ATRN	2.14794e+16	4762732569966615	5362481366038452	9416239172438228	9597349479204248
DDRGK1	-2.48834e+16	6116180421945448	1.22383e+16	2686099046774488	3.60923e+16
MRPS26	2.70154e+16	7144062309575187	436727251229769	366355872020494	6681097415800363
PTPRA	1.254e+16	5294423045007077	2.49914e+16	6171355918687186	6950770094962627
PCED1A	4146213903722949	5248108094625801	3366894641525379	6651902842859278	1.11828e+16
IDH3B	1.95005e+16	6199988868712594	1.1993e+16	2.73462e+16	3.65757e+16
NSFL1C	-2759879347866915	6408002576672932	2313471158987497	1.28257e+16	1954475520664142
ENSSSCG00000007188	-6180848143029292	7803890325625812	2.6359e+16	2.83494e+08	1.38867e+09
FAM110A	5434503362544132	5098791919624925	4565565297303603	326209067755788	6.04202e+16
ENSSSCG00000007203	-315859022847072	6874845620247012	5.95594e+16	1.46678e+16	3028987103680632
RBCK1	2575859581076745	5791893461088172	1.6112e+16	2.04323e+16	2.88255e+16
DEFB115	-2.35585e+16	4263854427770748	1.46238e+16	1312462803367755	4252837761659524
HM13	-1.67055e+16	5623957576188976	5799118987925347	4.46347e+16	541016264610808
TPX2	5819466782826137	6832612285877824	8801229957026567	2.0554e-178	1.46436e-174
POFUT1	3228249919490679	5434087883870443	2.30603e+16	1288726000088318	1.96185e+16
TM9SF4	2860545266172653	4933914170550989	9783885682391542	3.22597e+16	4176240159300059
KIF3B	5117153075913922	5043091900009501	3.11532e+16	7755910966960794	1.27548e+16
ASXL1	9184543693297	4700224803325667	7401458120586888	6517103030404296	1.46829e+16
NOL4L	-1.56679e+16	6.88044e+16	1.45705e+16	2.274e+16	3143107413827071
MAPRE1	2.46332e+16	630155006790543	1.49149e+16	2219858669233662	3082229057411485
E2F1	2.8589e+16	5169378732942141	6967049498035162	0.0700867	0.843144
CHMP4B	-5843566232194438	7324811188701445	1729282413715458	3.20394e+10	1.15479e+16
RALY	9349546391104796	8259866082574597	6.96118e+10	9933430331245856	9951324760328092
AHCY	1871882363491297	4810147387695952	4.7292e+16	6116.28	49517.2
ITCH	-6759592964055421	5800270962453923	8195737239985354	4198892825144317	9905555847985782
MAP1LC3A	5321940048195249	7155944910635433	1.28647e+16	7198387397413081	7845667175286873
PIGU	-1547359495393589	4973273216672397	1.9776e+16	656534615512699	7308506865742058
NCOA6	1.4717e+16	5171603568643593	3852639321190532	5347994456232859	6225733560886908
GSS	-1.50996e+16	6698802902861207	6434537654352458	10.4413	114.249
TRPC4AP	-4.66769e+16	5537060178580984	2.65375e+16	8705946548782899	9081263912607116
ROMO1	-7668024487262819	838931297339139	5255271845181202	4.68493e+16	5618779888588795
RBM39	-2608716444175392	8794235992172963	5862467570893792	1.54671e+16	3.17157e+16
ENSSSCG00000007311	7104077951400716	5262074907766521	1.04461e+16	1.22906e+16	3268655915263118
SCAND1	-9372288300670704	9165863135248728	6655478278171617	0.00340303	3.85517
AAR2	-4658154096607221	5183342726514306	3.25663e+16	7113500819544201	1184106107344689
DLGAP4	-3051962473672743	6673763260883854	1924293545379993	9.37719e-29	3.85427e-26
ENSSSCG00000007322	-2.39547e+16	6360667101124748	2.11868e+16	1.45512e+16	2.16831e+16
RBL1	2.09637e+16	4793282683381365	4.54822e+16	154032	1.19426e+06
ENSSSCG00000007336	-4.7176e+16	7217980394455185	1.14873e+16	7007152726527406	1978417581791886
CTNNBL1	2106519211816333	5318435333815871	8596627833304575	3.53833e+16	4.50375e+16
RPRD1B	1.77361e+16	5139999390128094	5306700331239043	4.66325e+16	5598348291453508
FAM83D	5132892753913611	4293943492700874	8420538067581667	4.45955e-06	0.000661913
TOP1	-6254461016708576	7.99403e+16	2.10963e+16	4.36766e+10	1.80331e+11
CHD6	-9852869051725534	6094660105239111	2069206881275835	5.3939e+09	2.20151e+11
SRSF6	-5851306992928458	7822411177404147	2.45255e+16	7.3333e+07	3.39013e+10
IFT52	-1.30775e+16	5341440642217663	3.07818e+16	9557550095245426	968774601828659
HNF4A	1.29354e+16	6054123108315093	5849736762955695	4443693755162675	5392309681700052
YWHAB	-2.83236e+16	85413350289002	5319986174810948	2.10822e+16	4151687033032275
UBE2C	7324307245797481	8727062883849241	1.03624e+16	2.38489e-211	5.09731e-209
CTSA	8127585753227592	5138641422220138	8019162106581835	46284979175553	1.08116e+16
PCIF1	-2.4242e+16	5587766067443611	1371515499610025	2415516705074125	3306638153914451
NCOA5	-2633055830562185	5475616452894736	8806257199215377	3.4803e+16	444713162509735
TP53RK	-516878008593992	5583309845132067	5345982577457109	2077007432654038	4101561952010377
ZMYND8	-5412907251684459	5819144958428123	7472067774620417	6266353881000393	1.41528e+16
NCOA3	-2551307633122275	5155526008309401	1.00861e+16	3.15237e+16	4098331682976035
B4GALT5	-1.88474e+16	5495095754607257	4.9556e+16	19279.3	162230
SLC9A8	-4939826252846403	5265686272656155	4193464106430259	4058009660693788	7302822886435185
PTPN1	2.39256e+16	6087074467182402	2.08088e+16	1.49154e+16	2.21281e+16
RIPOR3	-1.05578e+16	6322825057705062	1.82149e+16	1.97328e+11	7.38625e+10
BCAS4	-6217522054662174	6309648537148555	1.22907e+16	7259030801176561	7894319114169625
ADNP	-6122340291111688	6.40163e+16	1.45142e+16	1.39103e+16	4491094140928881
MOCS3	-9385040334639204	4642562694083736	4931139108596774	2.63769e+16	5039596014361301
ATP9A	6548974192000862	5.91632e+16	1.00399e+16	1.53182e+16	3995948107595539
PFDN4	-5574807808854757	6965410882860964	830872073242221	394551712814207	9380295078104172
FAM210B	9534230270897960	5128406840651687	166574387257158	4.47744e+11	1575704196031123
ENSSSCG00000007493	4.87051e+16	5238183386212248	1.72731e+16	1.87397e-23	6.75052e-23
RTF2	-1.87382e+16	6138817326006887	1229747780389145	2674560943842801	3.59826e+16
RAE1	-4.2849e+16	5.29658e+16	3119384565074416	7736599846255346	1.27314e+16
RAB22A	-1.87761e+16	5288311256770146	6089405375377055	9378004965495144	9575236023316804
VAPB	3.70053e+16	6474637554841238	5588584151183795	9811396169519638	9860415977846272
ENSSSCG00000007516	-4.57751e+16	5305657333041624	3.18955e+16	7411033407565323	1.22663e+16
GNAS	3.7685e+16	6849733685371047	4406285496539089	358067285016843	655417479739651
NELFCD	-102720584250421	6334477599712301	4147089322959374	9486534033606272	9636827665317400
CTSZ	-6115287729798333	6168075354056563	2031750653647439	1.54043e+16	2.27377e+16
ENSSSCG00000007524	3.35662e+16	1.11988e+16	1795216754053542	2.26526e+10	8.39588e+10
PDGFA	-1.19748e+16	4994619371634372	1.08591e+16	9831211061645508	2.68932e+16
SUN1	4991595359752945	6816763108732351	9914924989744776	1.63944e+16	4250739047181776
ZFAND2A	4121834078766748	4749994054433872	2.3131e+16	1.28288e+16	1954475520664142
PSMG3	1.38345e+16	6831385833029505	6492282813500143	4.20389e+16	5162866309133114
TTYH3	-9836824882671026	6038550421942158	1.51278e+16	1.00473e+16	3.34145e+16
IQCE	5833070155985819	5131166417632284	3861902591913392	4.93943e+16	8658178352203416
SDK1	2379360969313211	4630564605825732	4543157426363627	158066	1.2211e+06
WIPI2	-1226701366723361	6177942751437576	5493926916066929	4.58566e+16	552567781071071
ACTB	1.10282e+16	5811628712605291	1.81601e+16	6700011136575975	7426183475838402
FSCN1	-2850220006633951	6623271487560509	1290914339455171	6.47651e-16	1.53238e-12
NPTX2	-8855610451017687	6580197021043814	1.81139e+16	6703961219621052	742927745250781
TMEM130	4601785496317175	4800594665346578	2.13237e+16	1.44218e+16	2.15393e+16
TRRAP	-3834569772387877	5120068738621118	1814510105454847	1.77968e+16	2568381166609356
KPNA7	-1.2458e+16	7915054454161804	8097034161119296	3682079503330008	4.64662e+16
ENSSSCG00000007609	1.74137e+16	8190189829622422	2787506683399383	9500193830717428	1.5187e+16
BUD31	-2.04089e+16	7.43323e+16	2.53975e+16	1.11012e+16	1.7298e+16
LAMTOR4	-2.23235e+16	7.59944e+16	3712076704381878	5402014053419624	9346388049251652
GPC2	-6016482396017215	5006794305069277	8435188842209007	4.14103e-05	0.000618935
PPP1R35	5954564343153932	5944592275275175	1.16785e+16	6322808396317277	1.79627e+16
AGFG2	-7497979498192512	5.75913e+16	914058873789306	2500006453851966	6230097699999536
GIGYF1	2405804703216985	4697384656421357	6847148937064667	4.07968e+16	5040250572399426
GNB2	-7108828936482338	926047699821433	6479903925940391	4.20832e+16	5167321569976762
TFR2	867265267464266	4990378733148249	951604285815159	2.03683e+16	5.18055e+16
POP7	-3581480123418867	682474938474952	6623888293878277	1.0062e+16	2166470681022585
CUX1	-1.17762e+16	6706448906514095	4.7912e+16	4888210568801559	5800001141220503
LRWD1	4702770695276042	5436262049983088	5157292767808566	2.3149e+16	4.49247e+16
ENSSSCG00000007688	1.98453e+16	7694520497449432	2.78473e+16	8674683357101122	9061920769914042
ENSSSCG00000007692	-4617125673700047	6762381220198244	1.14115e+16	7299068490740756	2.0518e+16
TBL2	35413759740673	5440903279131626	2.49545e+16	1.14175e+16	1.77348e+16
MLXIPL	-2923604004558281	7231928121273717	4.07194e+16	4.36011e+16	778313721284012
BUD23	-4.92553e+16	7380336181183211	1.57597e+16	7.19168e+10	2455434861890799
ABHD11	2409319043045321	7173466414040514	2811306759208369	9360210173998158	1500441690891905
METTL27	3.17952e+16	4114318463473009	4609742799568018	112516	8856.59
CLDN4	-1.93328e+16	6973706792431087	5.87596e+16	178.163	1799.02
GTF2I	-3.59757e+16	7202294386779268	7729453251648582	5432719785013915	1.249e+16
AUTS2	-6047124968718449	7291815014839036	1888003933376696	1.39202e+11	5.35751e+10
SBDS	1.81979e+16	5954028681133908	5504146576106486	4581483147568656	5524088966464097
TMEM248	1611595866951645	5359726705603927	491701176853951	4831694282766503	574676752756424
TPST1	-2.72135e+16	463667061346196	7882049529830981	3746434607553726	4.713e+16
ENSSSCG00000007738	9605667909879892	4514492995236523	6.42829e+16	1.12316e+16	2.39658e+16
GUSB	4960119049844132	4846483954026306	2718465250505491	9919335002082252	1.57277e+16
ENSSSCG00000007743	682105853933231	927806927669704	4815858488950475	4.87705e+16	5788899704171155
PHKG1	1.1231e+16	4063458147986176	3775711436939588	5200178220671045	9053364852278778
ENSSSCG00000007749	-3054962192301772	6820962709616801	5.44553e+16	1.96184e+16	3899358048114372
BCKDK	4725490149114521	608510121307157	824629974538604	4083515823717312	967609144925181
BCL7C	-1.70097e+16	7014881702464513	1.20677e+16	4.49688e-13	9.84096e-12
PHKG2	4.49796e+16	5190155512883135	3197982567232085	7372916732173021	1.2219e+16
PRR14	-133875184827853	4.78839e+16	1.51492e+16	9689526474850486	9770285226724534
CD2BP2	2782103505570475	5963307826673172	2.60849e+16	1.06293e+16	1669570373587766
DCTPP1	-8260186838565787	6392771669380596	2.14115e+16	3.70537e+10	1.54178e+10
TUFM	-4.48841e+16	6200331710796477	7082706856491205	7783135242244389	1721559196967826
XPO6	2151295599818589	5167061765350804	8306269522692418	3.62091e+16	4.58931e+16
GTF3C1	-5445726569357454	5226111082830229	4654328872062321	3.09753e+16	5.7888e+16
ENSSSCG00000007826	-2.45122e+16	5.95416e+16	1.90222e+16	1.6783e+16	2.44241e+16
RBBP6	4543346093942323	6880927146747139	1.22467e+16	4660726034668928	1.36273e+16
UQCRC2	-6133328014666685	7108903173042354	2.4495e+16	9605268467711848	9725087859619198
CRYM	-2.25333e+16	6102903880852131	1.34587e+16	2.46002e+16	3.3536e+16
LYRM1	-4.61312e+16	5918607111543059	5855994375672613	1.55241e+16	3181221793169645
REXO5	1.63064e+16	4.74592e+16	2882795734819165	7.9101e+07	4.137e+08
XYLT1	6668155704935598	5121293284671309	6812111398347653	7940923388645784	8453793917980535
ZC3H7A	5146800009532211	547540298500843	6215625107223232	1.26628e+16	2.66322e+16
TXNDC11	241534898461731	5109103342830555	7011583160624504	4.02395e+16	4988699111661425
USP7	5825533668881769	5881345243936105	995469826583495	9748300668464544	9818740792679024
RBFOX1	2482924237323253	5.85109e+16	1.01732e+16	6.35803e-09	1.19905e-06
UBN1	-1809357985684004	4848886242572709	3373265357884616	5613764761091902	6469349325686785
PPL	-1.84073e+16	5217784618953198	386174101397194	515570	3.43642e+07
MGRN1	-3.47015e+16	4086110767686555	1.91255e+16	9889659985189402	9923708892806644
ROGDI	-1.16857e+16	7074384196628614	5447927942380406	1570.96	14705.1
ANKS3	4.55797e+16	5361340706914923	4518849207831272	3.35234e+16	6187618021171776
ENSSSCG00000007940	4.01316e+16	5010905361943991	2.36856e+16	1.23801e+16	1.89725e+16
CDIP1	6548229961009722	5351245593370049	8959690031366385	764690240140145	822545515815905
HMOX2	-1.1668e+16	6.50902e+16	6515548475812469	4195573289460557	5155618231510366
NMRAL1	-2716698401894459	5669347446049782	1.20975e+16	2.71382e+16	3635818509681583
ENSSSCG00000007944	1.98413e+16	4730730061434186	4592984326125026	12256.5	958.395
PAM16	-382603275713035	6582425122217349	5.8664e+16	1.54326e+16	3.16652e+16
CREBBP	-6831259060632938	586678314484101	1.3558e+16	7127148606310346	7782445947852912
TRAP1	-4096689437640564	6280048474188931	6156033015902684	1.30965e+16	2.74696e+16
CLUAP1	5935745512459677	4627557036492106	1969523569563595	1.60498e+16	2350116479918875
SNRNP25	7758064854758107	8141823142103805	5976501036027176	106.887	1103.64
POLR3K	-2.93073e+16	6718959174716647	300240120716977	8314120907453383	1.35339e+16
ENSSSCG00000007978	-704916766841387	5270697268419409	2.93454e+16	8670362251468593	1.40357e+16
LUC7L	-2990892709048252	6470051675789172	2.89621e+16	8878825087333142	1.43291e+16
FAM234A	4.85847e+16	5093646639698236	2583020555241191	1.08015e+16	1.69049e+16
NPRL3	-1.73144e+16	5199201872197728	4990521217170141	4799169079993227	5715503740883464
ENSSSCG00000007982	4806958296017801	5821673531303099	5419363210027251	1.99146e+16	3949661469190179
MRPL28	-1.72699e+16	543825882680485	4393697833790071	5074267910064822	5965567627307599
NME4	1.28545e+16	4.71569e+16	1.18507e+16	5763952818561447	1.65214e+16
DECR2	1620016479009089	5875451973143155	5947029165427047	4.40606e+16	5355767596612745
JMJD8	1.17669e+16	5370822551342381	3.27896e+16	1.02691e+08	5.91603e+07
WDR90	1.62018e+16	5141900833103127	441732069491703	30056.7	2.2462e+06
MCRIP2	5284510772214065	4989084949461857	3142729781832596	7626606390734596	1260030924436749
RPUSD1	-2.5611e+16	5.17362e+16	1.11369e+16	2912801600920196	3845353894399897
ANTKMT	2186826655606852	6994909225280361	1.63386e+16	2.01169e+16	2841812097621646
STUB1	4.31704e+16	6428067595131477	7546095309132747	6014025375678657	1367929432736841
LMF1	-4.45978e+16	6298003016884652	5058320463735463	2.4508e+16	4.72696e+16
ENSSSCG00000008012	-1.39833e+16	7378431276323696	9514596718524774	1.76852e-06	3.03202e-05
MRPS34	5.28352e+16	6224730469718261	7166160124593368	7889326779281284	841843290210544
JPT2	2.77183e+16	5899757402123742	2152285594473735	8833635296733331	9177133752860356
BAIAP3	-6098047097594272	5372033589785038	6269364636954755	1.22843e+16	2596229212436276
TSR3	1110917294322607	5220499582004764	2.30442e+16	1.58322e+10	6.97706e+09
GFER	1.26015e+16	5932738410507863	4.31273e+16	51292.1	375868
TRAF7	-4189426981271525	5802145393792744	4569292346821031	3.255e+16	6.03448e+16
MLST8	-3032455675687386	4962528098250615	708001547420265	400108049064088	4.96611e+16
RNPS1	3005642110487743	8238831956263823	6495307346671362	1.0816e+16	2.31401e+16
ENSSSCG00000008057	5821810634623787	561314366224824	9332394438417592	2251379792821644	5667784543216482
KCTD5	-2.0638e+16	5282421920516404	3848584188318919	551523	3.66084e+06
ELOB	-3.72195e+16	9501478285398632	1.49791e+16	1087083521765877	3591128048203402
IARS1	-2830034771311792	6046256665456353	1.3672e+16	2.42294e+16	3.31538e+16
CENPP	2.25366e+16	4.68634e+16	5.52165e+16	1079.59	10225
ASPN	2244794815018598	3911412842626734	2.07259e+16	5.2993e+09	2.16704e+11
CARD19	1361152246390582	5480412146655642	4714971618894951	6576.62	529765
FAM120A	2.06037e+16	6266388530314517	1.75302e+16	1.85497e+16	2657895601621216
PHF2	4.36425e+16	4917466494011309	2.21082e+16	1.37046e+16	2.06595e+16
CHCHD5	-1123254570946025	612762504497668	3044556798065141	5811024994855583	6632305494306514
ZC3H6	1.07718e+16	5409250202505636	2.56524e+16	4.08794e+09	1.95904e+09
ZC3H8	-1216578063373307	637966839136067	4.05054e+16	1.96071e+06	1.36356e+07
MRPS5	753050077416907	6075093869724623	1137734709699636	7358883228101002	798174164038931
ARID5A	-4601873270764966	4872492415557371	5.4053e+16	1951.5	18082.4
NCAPH	3349839768633936	5003814745574946	440472714677135	32054	238989
SNRNP200	-3.49127e+16	6611506252695195	4188875264311397	4069008447474613	7318508321236247
RANBP2	4.13751e+16	5.9039e+16	2883143880278194	8951110315637824	1442865002512403
ENSSSCG00000008137	-7693259552326185	6917003983314736	2.65948e+16	2.50912e+08	1.23568e+10
GCC2	-6403431679382148	7257830095949989	2463805142556082	6.91723e+08	3.21634e+09
UXS1	7455748906590649	5680113975379356	9043471962062192	2.63634e+16	6539359061957074
NCK2	-8490734982760482	5.34457e+16	1.00646e+16	1.51144e+16	3950816343536337
MAP4K4	-1088173073406934	7081604316108085	5056823253434688	11509.3	985.282
TBC1D8	-9871808894723512	5763127406812594	1.8184e+16	2.00553e+11	7.49822e+10
RPL31	-1.99482e+16	1070878985569098	3585915765963227	5.82713e+16	9971591119406072
CHST10	493246249955156	5406642278524359	4247687540976868	3930381449082597	7101044195975659
REV1	-2949407208324486	6201031829884559	2241921017217564	1.34314e+16	2.03358e+16
EIF5B	-4911061400595647	8028038632285062	1963809341243019	9.35847e+09	3.6859e+11
TXNDC9	-6170200540739992	6872030278182267	1.53107e+16	9.12e+10	3.06165e+16
ENSSSCG00000008183	1.09424e+16	7198906086128096	6352211179935772	4254466161729858	5211009938684211
MGAT4A	-8023148579228684	7394983662522447	2957079669903706	5865857360755226	667943125504573
TMEM131	-6224167142345675	5942459846278095	7607161431881693	7826933645881193	8369963064941663
ACTR1B	3878211272125325	5542389375111566	3.8032e+16	5.11547e+16	8922846070135144
COX5B	-1.82842e+16	9108872948205096	345806883825132	6294378856927377	1.0663e+16
RPIA	-3256381972592135	5403417158011244	2126861796989984	1.44737e+16	2159768346703746
ENSSSCG00000008222	3802846960804868	7610152716491838	8517212233469786	3518029952055518	8458045763996993
RNF181	-1.09057e+16	6860719802212034	5644925744133147	4.52456e+16	5471796156591243
TMEM150A	-2.62008e+16	5529882368186315	7676272985896688	0.0192782	0.252784
ELMOD3	-1.06034e+16	4.84264e+16	1.06345e+16	1109966614121967	2990380642752123
KCMF1	-2.17332e+16	530849562252341	7653144122337086	3.8167e+16	4.789e+16
TMSB10	-1.05683e+16	1.22702e+16	9967709723254208	1.79384e-07	3.24918e-06
SUCLG1	-2.2125e+16	8203779140348521	4440510066050685	8331017264983128	8791640695185647
ENSSSCG00000008250	1.90282e+16	5117089467852166	387772084912973	475042	3.17619e+06
AUP1	1665925727486526	6.0394e+16	699558175711589	4.02932e+16	4.99247e+16
CCDC142	5300379102326571	6618215416167215	1.26766e+16	7218088268830157	786045889601545
DCTN1	8754644303479436	5.3115e+16	1.31783e+16	2.83211e+16	8651506714117746
RTKN	1.03359e+16	5475059291651705	1.68001e+16	6818941601230111	7530667162777724
WDR54	6327566704082178	5.89913e+16	1.34341e+16	2.47088e+16	7624304011515779
ENSSSCG00000008287	3635081735560019	5073784516935976	1.99788e+16	1.57519e+16	2.31442e+16
MTHFD2	2.66122e+16	4627797682213871	1.79027e+16	2.32491e+11	8.59211e+10
TET3	-1.30743e+16	4581843781679956	1.04577e+16	1221398869246688	3.25503e+16
DGUOK	-2.32317e+16	5606524292711641	1.04758e+16	3.06064e+16	4.00017e+16
TPRKB	1.73137e+16	5820978081205554	8230657238087238	3642853423691204	4.60982e+16
DUSP11	-3.26808e+16	5410507248021155	1.90667e+16	1.67334e+16	2436294546584485
CCT7	-1565575037841369	7991982493747383	1408659262254556	2352790908725148	3.23389e+16
PRADC1	2.98046e+16	6603412546322303	3.5257e+16	6042448672104054	1.02906e+16
SPR	-4.37088e+16	5.15894e+16	2.64675e+16	1.03762e+16	1.6339e+16
EXOC6B	-7426700428755728	5.8377e+16	1.3483e+16	2.40729e+16	7449580598183114
NAGK	-3300257410697534	5774413186470923	2802799732238203	9409986102272248	1.50616e+16
ENSSSCG00000008317	-5207997394855185	5758732797377871	7.08592e+16	7769175963654298	1.72016e+16
MXD1	-4764758385236129	5083313455181685	3261647796102695	7091782944530353	1.1811e+16
ENSSSCG00000008335	-1.17423e+16	5579783443450273	2900827349378403	5901675166671706	6708588056877959
ANXA4	6587738571872488	7294964120897101	2194757910757405	2.802e+09	1.19062e+10
AAK1	6900426128390869	6393997791404902	1642817680292619	5.05285e+11	1763685003573306
GFPT1	4902454488588734	576109504404445	5840968900499991	1.56572e+16	3204404149823559
APLF	-2357527077853655	4909497067527328	3301381870326498	9.15062e+06	5.30025e+06
PNO1	-3.36722e+16	5.43676e+16	2.20962e+16	1.37152e+16	2.06633e+16
ACTR2	-5060458949646745	6473662670127743	6513993045238564	7985491266725163	8488556034854401
RAB1A	-6319940615896756	8037606955184163	3.08458e+16	2.79366e+06	1.52191e+09
AFTPH	7594392628651833	566298313732241	1.40491e+16	707793016808928	774201437014474
UGP2	1.1302e+16	6.03839e+16	3133319241982093	5756427444827377	6582880823298224
EHBP1	5220255860643889	5.27482e+16	3.21169e+16	7311376369015138	1.21264e+16
COMMD1	-2.02746e+16	6927696728636333	2052499315859876	1.51957e+16	2.24814e+16
CCT4	-4989982210233134	7820800520297918	1.63837e+16	5.17282e+11	1801635378396467
FAM161A	2.88815e+16	4842381433120491	1.04405e+16	3068809893819017	4009211295673908
USP34	-2.61465e+16	6271127811990705	2.68935e+16	86973720073091	907713450739336
KIAA1841	-8485713975015514	5520693527828267	1087765604597557	7415413263748958	8028981737108801
PEX13	-5940074631894342	49360482933791	4636290049226492	3.13026e+16	5839752287732123
PAPOLG	-3606218662346477	5435725648048774	2.6017e+16	1.06749e+16	1675174083903454
BCL11A	-3456015208218634	4423536563012625	2.85329e+16	5932294854926498	6734751170288368
FANCL	2.11913e+16	4722757625644102	3242311934326875	1.24002e+07	7.08017e+07
CCDC85A	1.24668e+16	4.56926e+16	8186422003754055	4220508237783067	9952886657103724
PPP4R3B	-1.71259e+16	7225506340142983	1.79233e+16	1.80642e+16	2596452869304883
CFAP36	-4.1841e+16	7045043018717201	1.20417e+16	7285825267191893	7916744892939235
MTIF2	-7754935223981259	5510610277735907	1.14477e+16	7158188488286723	2.01574e+16
CCDC88A	2.75738e+16	7481205519452548	3928022734796933	4748774755590949	8376655772448188
PSME4	-2663754142359952	4884482135376746	93120680626929	3.3455e+16	4.30576e+16
ERLEC1	5552904969679938	6562515906455335	1.28109e+16	3.44601e+16	1.03396e+16
ASB3	2477363901190822	5108935543189788	9819399356542746	9210645232393512	9453923039876292
PPP1R21	4905034519973634	5.29387e+16	4935539902581466	2.63098e+16	5.02978e+16
MSH2	3584458047660148	5460063284000493	2.99897e+16	8331732967871908	1.35523e+16
EPCAM	2.75153e+16	9150346784572940	5904554472673599	1.51018e+16	3.1066e+16
STPG4	5651725158670396	1.10456e+16	2.70834e+16	1.94868e+09	9.73886e+07
SOCS5	-586937607492264	7105440692078117	2.00009e+16	7.74066e+09	3.0924e+11
PIGF	2.73199e+16	5557850067625218	1.48238e+16	2234022062141119	3.09921e+16
PRKCE	9287372116649476	618308249756079	3.33599e+16	765870	4.48471e+07
SRBD1	6792336911032898	516664866500011	747513592845298	6255684229068821	1.41437e+16
PREPL	440734888373421	6156112526717267	7174111493511985	7396306949936794	1644992027852748
ENSSSCG00000008451	3.85542e+16	653111862743454	7375668331804235	6.61122e+16	1.48637e+16
LRPPRC	1.53998e+16	544234788664615	5095556903714176	4.75331e+16	5673536901865618
COX7A2L	3928277905469318	9172838951848012	8323851973731845	3.91279e+16	932321926678071
EML4	-2.3029e+16	7282249534493151	2646123021267533	1.03803e+16	1634135582467099
PKDCC	-8008123718986941	6087179525530074	1.86019e+16	1.61056e+10	6.12146e+10
THUMPD2	-5265600477557504	5579646275760842	4.86479e+16	2.74101e+16	5209060561258837
MAP4K3	-2.05036e+16	5775659491399398	9015231083091156	3.42374e+16	4.38621e+16
SOS1	-2.25174e+16	6776358063805198	1.74797e+16	1.86132e+16	2.66402e+16
ENSSSCG00000008480	3212637441445048	6.83835e+16	4245240711612308	3936048956476897	7109280537726723
GEMIN6	1209292520804222	5422734485246993	3.10303e+16	5774942797374839	6595819953111413
SRSF7	4837176016202056	8861584341432637	1.51967e+16	6966625643356125	7646772742041291
ATL2	7783116058591855	5300998380195796	6828462422880932	9791525903859508	9848355152242692
QPCT	4966681324733596	4166231216208133	5637187831669385	59.9821	580.099
CEBPZ	-868162985880246	5633642003702961	1.45053e+16	7033081028906738	7699524595757214
PRKD3	-2078367241787787	5561355051871091	9329856915987538	3340882948960943	4300690919240628
EIF2AK2	1.24531e+16	5395525890044158	2.22635e+16	2.3768e+09	1.02145e+09
GPATCH11	-3201556672562829	5754449010455198	1.75243e+16	1855713701348173	2658061787553551
HEATR5B	5.89095e+16	5160773214266724	6.08545e+16	8051504591101573	8548807325408724
CRIM1	2.47e+16	4709778061394373	4.15425e+16	1.15333e+06	817146
FAM98A	-702300788591337	5.01526e+16	5862786365030482	1.54643e+16	3.17157e+16
BIRC6	1809048093879721	5883899597084173	8542509344622307	3.55353e+16	4519080745345299
MEMO1	-5243997603228429	5.54463e+16	5454543946182142	1.95175e+16	3882910250751182
DPY30	-4017054708988974	796550971300818	1.20246e+16	525027643923219	1.51917e+16
SPAST	-5101795715395349	5389123415869407	4312688634868133	3782912886990826	6869452685184134
SLC30A6	333789989983772	4651085997240131	6263564391751331	428694954165226	524378490291383
YPEL5	-1.57757e+16	624182589347548	58717148425305	182.048	1835.36
PPP1CB	-4.02532e+16	7742055809970301	1.23181e+16	4485881324522649	1316936832965378
SUPT7L	2.12636e+16	4628260306834519	1.80406e+16	6710246829658302	7433673578398243
SLC4A1AP	6438607346089972	5272504490556431	6883999821183906	7930332885714448	8448129998870417
PREB	-8089344858237274	6137978794125121	2.13251e+16	6442315345649893	7196537630018661
KHK	7882866441642703	5213427988915092	1.24268e+16	4.23211e+16	1.24822e+16
EMILIN1	7233124305275523	4781642963940473	4.37484e+16	8343223737667297	8800255075822127
HADHB	8888551858466077	6154586321732757	2152804349302535	6426597627891734	7182733831277984
HADHA	-8670133278753571	6534561011859189	2336484519228943	6288316538151066	7055238082698974
RAB10	-4.34608e+16	6738807910763267	8605233363395499	3.35198e+16	811666255678429
ENSSSCG00000008576	1.33143e+16	4870488176979609	1875424819963717	1.48692e+11	5.69541e+10
ADCY3	8292531892833396	5868263809118824	2.00792e+16	65408192965498	7286263608317811
NCOA1	4.87988e+16	5733818843164437	654949311018278	7980127849461195	8484261278518518
ITSN2	7931962588188967	5318471303803828	1.20625e+16	5144762237627046	1.49104e+16
SF3B6	-1.60682e+16	7287422226484906	1.29826e+16	2545310890108216	345284496378346
ATAD2B	-1.03957e+16	5360001985957257	1.55944e+16	7.8488e+10	2664186065880425
PUM2	-1.81596e+16	723600377644329	1326381118247948	2.4945e+16	3396631284286442
LAPTM4A	3866067879359653	7999056168508046	1.03269e+16	1.31106e+16	3470897860594486
WDR35	2340089733558105	5.44869e+16	1.14769e+16	284033745488811	3773776162607244
RDH14	-4210264168061772	5204125468271316	315788378211348	8589551648158442	8992033496815008
GEN1	4785513738585069	5132420589771872	1.76821e+16	2.39682e-25	8.93513e-24
SMC6	9029096733289296	6064794840047847	1.76802e+16	2.61332e+11	9.58066e+10
DDX1	-586835781872858	6.31675e+16	901186527303006	2.68233e+16	6650839169939199
ROCK2	3685377619469837	6112114970005246	4.28498e+16	3.84506e+16	6966502574588566
PDIA6	1.29402e+16	839479062812477	9017875066385628	9243446185364088	9475493512836344
YWHAQ	1816764865687658	9447327514163660	5277214954916902	2.16063e+16	4236681352307244
IAH1	2.01885e+16	6338666413236545	1717918007201181	1.89961e+16	2.71035e+16
ASAP2	-1457024368839495	6095599409620915	3856620502801188	529275	3.5241e+07
KIDINS220	-2.36307e+16	6583721687736039	1.76514e+16	1839848592696776	2638584025133466
ID2	-1.14076e+16	6096679665800678	2.05112e+16	6506260579797248	7254067612182221
ENSSSCG00000008659	4200692718796431	8020437967562025	1.41431e+16	1.69419e+16	5375122194419502
ENSSSCG00000008677	6269897957641331	5454716187086568	4.34238e+16	1.94283e-81	3.19422e-78
SLBP	1.81397e+16	6507920783629442	1474480816864407	6.26296e-19	1.80892e-18
ENSSSCG00000008686	-1.01858e+16	785238476660619	2.36594e+16	1.14985e+10	5.14931e+09
MXD4	-9036944197148136	5708386353706648	1.6968e+16	3.80161e+10	1.35497e+16
RNF4	3943872481559266	5757832481328736	4.56829e+16	325690303118859	6035624923693999
ADD1	1.61474e+16	5345936213569357	4503659780568814	5021612084501632	5918856008423614
MFSD10	-1.03133e+16	5298560195826884	1.79959e+16	6714082883661726	7435353963737303
HTT	1.79305e+16	4939825132103566	39813585889019	528053550559809	6162138264172731
RGS12	-9961963892327696	5.54191e+16	2310501680338639	9616623055364140	9727368201766032
LRPAP1	3891297640140814	7442730592827254	8695006897335844	7680909204573182	8250961604912589
LYAR	1.21219e+16	5266958474129609	3172248900866337	1.77851e+08	9.97707e+07
BOD1L1	4589377211446531	5491928428060674	3.73169e+16	5.33894e+16	9254732793404116
FBXL5	-6001531421094177	6298547835580186	1197665015278421	5387133972545893	1.55526e+16
NCAPG	4830301636093242	5850984036308135	2295860782962959	7.33859e-37	4.12763e-35
ENSSSCG00000008748	-3.69889e+16	803209089517812	7534657676729495	7837055447610801	8377992585875368
PACRGL	1.31326e+16	5169477673416966	2947702512324728	5871797329322292	6682634802203503
ADGRA3	-4940389410963976	5.21032e+16	365714371716477	5.58293e+16	9620458275359924
GBA3	5277562838944099	461048588011848	1.57706e+16	3.58886e-20	1.16221e-18
DHX15	6628934937475305	6.82983e+16	2543507655578816	6140280945343671	693159884182106
TBC1D19	1.08808e+16	5510609394561527	1.95093e+16	6587112986378805	7325107261300884
STIM2	1.56682e+16	4708788181147129	2.05465e+16	5.82006e+09	2.36491e+11
RELL1	1032876999407543	5.22121e+16	1.21434e+16	4926174460924094	1.43315e+16
PGM2	-2.06377e+16	5900611395098661	6209432937654607	3.27393	346.41
FAM114A1	9966955546121184	4966932101769234	1107911351750576	8730552832391666	2.42129e+16
KLHL5	548896440565687	4394475353493164	2.12415e+16	8841229877374254	9177588792896828
RFC1	7158028910922795	6267838151327865	1961419347839372	9.47626e+09	3.72543e+11
N4BP2	559637331800503	515295465059746	4631287665140764	3139399359400211	5855098514390388
RBM47	1.44823e+16	5.26635e+16	4513815078455397	183613	1.40661e+06
LIMCH1	-1099019270960551	7001027719867035	4451821847190729	9468030403730836	9628709111613342
SLC30A9	-2054126842782165	5822799801108327	7857757862369326	3.7538e+16	4720415298373194
ATP8A1	2929663565332168	5389329553056221	1.1985e+16	2.73621e+16	3.65893e+16
GNPDA2	-2554622214616739	5038670145389897	8393749876294248	3595755858536636	4.56554e+16
SLAIN2	-1.08405e+16	5143274603332708	1.46671e+16	1282634599038947	4.16418e+16
ZAR1	-5626124606222742	4219886693121883	1158691379925278	2.81737e+16	3.74792e+16
FRYL	2.17132e+16	511370193065291	7632379332049659	3823171154598302	4794465993365442
OCIAD2	2.10376e+16	5345391491207715	686918482355437	1.15116	1.34449
KIT	-2.95447e+16	7574126963689263	1540287917881193	2.28264e-19	7.03667e-19
ENSSSCG00000008845	4.69874e+16	4813820897481038	2.46635e+16	1.16307e+16	180005514762753
MAP9	6895680825461946	5118121822224627	3.91163e+16	4795302889112957	8447110473898978
CPE	2409023054442037	9075271562552052	1.4476e+16	2.42316e-18	6.87492e-18
ENSSSCG00000008855	-1.291e+16	6002698828949212	3.2181e+16	1.40459e+08	7.98428e+07
MSMO1	5708179314406062	6855027080234306	2139903240939705	3.72959e+09	1.55085e+11
GUCY1A1	1.11222e+16	6837480266160366	3561820168778897	2.40034e+07	1.48275e+08
GUCY1B1	2.26162e+16	5.38339e+16	9193272799400452	8.96736e-07	1.47433e-05
ETFDH	2885637991768633	5575000684012574	2092553337066848	1.48019e+16	2.19698e+16
PPID	-8687125184228335	6140214403651527	1945060311839962	1.03235e+11	4.02888e+10
NAF1	8809731328451999	506667620887797	1.15883e+16	7335434409249832	796120606501522
TMA16	-3970965927461963	5068717578186775	2.20533e+16	1375342698983849	2.0706e+16
ENSSSCG00000008892	-1.23471e+16	6068893752700039	3.83914e+16	578883	382029
ENSSSCG00000008898	3.02889e+16	8732179741174921	1653798792025488	7.55661e-23	2.61908e-20
ARL9	-6301484048701354	5740558012820596	8104173512974455	7758906162719444	8318024797752396
SRP72	521557353796005	5839107060884445	6126459448339073	1.33173e+16	2.78509e+16
PAICS	-1.13801e+16	5.70042e+16	2.06476e+16	5.52061e+09	2.24893e+10
CLOCK	-1.79157e+16	6084709225251741	7082235507317609	4000341815151047	4.96611e+16
CENPC	8179072118845054	5660968510846448	1.38226e+16	2.00902e+16	630226777055567
UBA6	3.23733e+16	5432070339026023	2.29592e+16	1.29715e+16	1972793913761444
GRSF1	-3271885540017418	6007772776238304	3363880822955684	666408502342157	1.11947e+16
ENSSSCG00000008942	-5424570559554074	5722798653672926	5201857321247436	2.25628e+16	4397339367040335
SLC4A4	1.14572e+16	7161622858079355	2982527397022391	4.72788e+07	2.52206e+09
COX18	-3.89647e+16	5076554931826071	1.7034e+16	1.91844e+16	2732345196781305
RCHY1	-3978004865831169	5929894017724502	3.69161e+16	5468692697745587	9451551907801808
CDKL2	-7762839657939276	6.25524e+16	8913754931206757	2.83031e+16	6966575461141228
USO1	-1.74933e+16	6.1775e+16	1173353332427756	2.78713e+16	3716950126352734
SDAD1	-3.73261e+16	5323149054580567	1698944853901784	19242602503214	2.73881e+16
SCARB2	-1.1795e+16	7164419477913468	714081369858339	0.0290472	0.354763
ENSSSCG00000008981	-2.28086e+16	5834328491856462	663744653371099	3.72902	4.21701
ENSSSCG00000008984	-2630106371180415	5061715368785977	8664655246323356	3519356628157304	4.48437e+16
SEPTIN11	2.16036e+16	5827400335502428	1.21229e+16	2708795432207488	3630601235642645
CCNI	-631557811293182	7875485732442615	2.29465e+16	1.66576e+10	7.30839e+09
CCNG2	-1.2853e+16	6164899278215386	3.8114e+16	667312	437506
CNOT6L	-3698894342908585	6499828463670822	4765952637114902	2.9028e+16	5467904737699722
ENSSSCG00000008990	-9106898903215336	6295448585345613	2.52976e+16	6149872973576249	6938762186621663
SFRP2	-3.26754e+16	5312725700043349	6744324276070002	2.1684	24.8282
TMEM131L	-5346449268272089	5704455944984855	4660339405971731	3.08671e+16	5771938657566079
MND1	3119737850959952	555645907890587	1.38553e+16	5.51606e-17	1.44955e-14
ARFIP1	-2.97776e+16	6339605173402706	3675413388578619	8479664921464141	8906078865917784
RPS3A	-1.3578e+16	1.15911e+16	8037245568802742	3.69982e+16	4663505658276648
LRBA	1.15493e+16	6846483787475442	4.23467e+16	515212220571535	6038569045851359
PRMT9	-7176062927647063	4959620714237297	4613305807935776	3172481912416462	5904776203893861
ZNF827	3.56669e+16	6418922512720285	4565489033446406	3262235919397054	6.04202e+16
SMAD1	-6829222067317898	5.40117e+16	7079719411011862	7796121690234039	1.72316e+16
OTUD4	-4292300237323095	5.2746e+16	284442874218699	916911773523471	1.47349e+16
ABCE1	-5941936779513128	6055448045194908	4426841142908664	353779258082791	6488651609916636
SMARCA5	-6539936485881795	7103096805838963	2.49138e+16	6176828572162286	6954490747094746
ZNF330	-2184592153601016	564191801168682	1125217407986912	2887977783462962	3.82124e+16
MAML3	-6336354663908645	7533997922035576	1266307637309576	3729480462238313	1.10967e+16
NAA15	3477550482124564	5768644116580449	3355420013951971	8546583119444398	8958752813777584
MGARP	4.79513e+16	7675254661396795	1.79015e+16	2.32639e+11	8.59265e+10
JADE1	1.65566e+16	4915159066862059	3894962331346034	434884	2.926e+07
ENSSSCG00000009072	7302670025216705	6637673507473831	1.73575e+16	3.09672e+11	1.11992e+16
PLK4	2.09683e+16	5495361508857736	65942976787128	0.464159	52.0313
BBS7	4682658404765576	664867443209081	5972587565203056	6.6076e-117	2.64799e-113
EXOSC9	3126347996364121	5511665092684886	2.19463e+16	8822299216653362	9171300677234332
ANXA5	4.62632e+16	6978197929180812	4963043560979891	2589459273598251	4966680485286265
SEC24D	7422922346315921	5065265239429745	9443402218823284	2119100277631349	5372744555228236
NDST3	2373802844285756	4634222442793161	3.89355e+16	4.38041e+06	2.93799e+06
CAMK2D	3.16603e+16	5072405576298396	971266388277435	3243645482968414	4196580879094728
ENSSSCG00000009126	3247331001989474	5413061017406473	2.3578e+16	1.24658e+16	1.90902e+16
AP1AR	1.36741e+16	6578012640422693	1.06349e+16	6.1822e-10	1.21596e-07
GAR1	-6696612992753795	5.38417e+16	6854328335949393	8842679167732096	1.93183e+16
CASP6	-5556698093431305	7777385225510907	2.0657e+16	5.4937e+09	2.24046e+11
OSTC	1.06431e+16	7334870538918101	514110905661699	473364671097006	5658490438243853
ENSSSCG00000009146	-6241334282566467	1.1899e+16	2.26598e+16	1.93373e+10	8.3891e+09
HADH	2295456318648312	804195959635462	3.0608e+16	1.56055e-52	1.37072e-51
TET2	-5209707619020187	5447765585727909	2.9821e+16	8418990034850155	1366647192492638
CISD2	1.07073e+16	7163462628264194	8210753126000677	0.00128881	0.00186122
PPP3CA	-2.71639e+16	6647632948149354	2.58612e+16	8722398066288035	9089325732257384
LAMTOR3	2.19766e+16	6269300323974043	1.64624e+16	1994719314598562	2822184520124885
DNAJB14	1.92175e+16	5533660119751891	9033258636086252	3418914875120304	4.38179e+16
H2AFZ	2.57002e+16	1.06098e+16	522600801116832	1.15002e-100	3.07247e-97
TRMT10A	-3.06999e+16	5758021314488371	22315171907519	1.35221e+16	2043982395759089
ADH5	-775653410246524	7445531324781559	385404388471361	536309	3.56723e+07
SMARCAD1	-3068732418407147	577934494935622	2.03725e+16	1.53487e+16	2266601476258802
ENSSSCG00000009211	3.09158e+16	6710544120230865	5268722463597744	2171194123990381	4252198143868761
PKD2	1.32526e+16	5.20158e+16	3378013503940196	6.17057e+06	3.65672e+07
DMP1	1.40083e+16	6012835849914045	5447647094123571	4604647567577609	5541479017137317
KLHL8	-3.22291e+16	5138233890682224	1.71314e+16	1.90578e+16	2.71734e+16
ARHGAP24	157635343345398	4834866972237883	2.14457e+16	3.63985e+08	1.51747e+10
WDFY3	4402712079977041	5649520247296114	4310743158224668	3787241351248375	6875365669367095
NKX6-1	9089730433393752	6354254385091332	309487055366615	2.64939e+08	1.44824e+09
COQ2	2.81523e+16	5.44447e+16	1.81614e+16	1.77773e+16	2.56615e+16
COPS4	-1.28521e+16	6622345350728226	6298552957238517	4274083973362507	5231041503569459
LIN54	2019255834917603	468141723628153	4354668552727227	41396.5	305448
SEC31A	-1.56316e+16	6506194253914148	7161429963480366	3974119979704292	4942335533694432
ENOPH1	2731367704586444	5713320276563069	1.57215e+16	2.09895e+16	2945606574873935
HNRNPD	4204083151043025	774496430838285	9763496568808116	1.78011e+16	4.59874e+16
PAQR3	-2.09236e+16	486043388566168	3.40833e+16	5593490620105099	6451783028622756
CRYL1	7993816223930379	6424651357471065	3175839158068058	1.74593e+08	9.82873e+07
IFT88	-6536953088146457	5972965120788504	5542750746405481	1855739112944561	3717275598937996
XPO4	-2.3829e+16	7458405507184676	3.42488e+16	6422082164710215	1.08569e+16
MIPEP	-5619072466551464	5296512804543004	3194285246663794	7389606609650133	1.22403e+16
ENSSSCG00000009293	578790478097816	4830409777361317	3193629981912238	8581675352533122	8985255120908292
CDK8	-6206502345801077	5129717435258084	5350196350750552	2071993723376268	4092921674149301
RPL21	5.50603e+16	1.07441e+16	2.34277e+16	9613957463382654	9727368201766032
GTF3A	6533309049206704	5207266924607542	7859449128267865	5055579314839376	1.17111e+16
POLR1D	-2664391124042806	7820491316498443	5194020294873449	2.26647e+16	4411891996537545
CDX2	-4656505801642772	5.11562e+16	2.60423e+16	1.06579e+16	1.67332e+16
PAN3	4.59122e+16	5.45322e+16	4.18452e+16	4079483103636142	7331178716512035
ENSSSCG00000009327	1.23683e+16	1.09114e+16	1.63301e+16	2.15038e-21	7.29536e-21
HSPH1	1.11428e+16	6645262107978363	2.18571e+16	2.9373e+10	1.24071e+11
ENSSSCG00000009341	-716323025834626	6281734394315723	1.78852e+16	2.34638e+11	8.66148e+10
PDS5B	6201615679505965	6528011950213469	1.5152e+16	9.91917e+10	3.30742e+16
RFC3	4261407835547995	7390326609763054	9166839430175068	2464398066329408	6150922694162773
CCNA1	4463201015223484	4378756239280055	1065482837512093	5.59135e-10	1.10996e-07
SMAD9	2.51432e+16	3966456474388068	2.66546e+16	2.43274e+09	1.19898e+10
EXOSC8	6890563218665169	5.65467e+16	1.12e+16	8179519968172785	2.27536e+16
SUPT20H	-4692135568417529	6790909333925723	628933778059916	1.21466e+16	2.57214e+16
ALG5	4497070020856012	5480664698204599	4017534146339198	450295045878825	7998038321814475
POSTN	-1.87233e+16	5876315541804714	6629803670452304	1.00286e+16	2.16074e+16
COG6	-3.24134e+16	5650203210569562	2039756789878332	1.53234e+16	2.26339e+16
FOXO1	1.86707e+16	6087100751052616	5939191124468565	129.199	132.125
MRPS31	-1.12321e+16	5643290490423307	2534798945428065	6146353656403662	6936011905114446
SLC25A15	1.23381e+16	4710569755420923	1322941179650946	2755902820269607	8434772736786979
CKAP2	7256825754581573	6519018113606936	7313540010871498	4.54759e-146	2.42993e-143
INTS6	-7182694342252224	5140389814742189	6.33531e+16	1.18358e+16	2.51711e+16
RCBTB2	-5839187922586302	5093719806156474	4888287780060821	2703948954589371	5150052115872279
ITM2B	4908892534114859	8319871379708992	1.16277e+16	7331081901057545	7957829211034532
SUCLA2	2602773399442483	6137483499254485	2572948415706387	1.08705e+16	1.69756e+16
ESD	-7087924144617441	7945837333856964	3304722948436806	8.99471e+06	5.21466e+07
CPB2	2195736989116865	4675095114320049	2581335236593885	3.76078e+09	1.81582e+10
ZC3H13	-3553110141698816	6.6378e+16	5259160762823998	218315436415296	4274316269602681
ENSSSCG00000009419	-3079971093655748	5100574562124564	1.14135e+16	2853677822940262	3.78601e+16
TSC22D1	1.48573e+16	7393998204507818	1.52834e+16	2.16361e+16	3.01392e+16
AKAP11	2.55289e+16	5659914663905208	1.47875e+16	9032126473803804	9324423595239092
NAA16	-6972891199409375	5717806641448807	1066766490087404	1.09025e+16	2945318689898519
ELF1	-1.20653e+16	5604784733214789	332493717997588	5641943730146919	6489341922764917
PCDH17	6521660652311061	5153403939681683	2007342088734692	1565393611681882	2303190417187753
DIAPH3	5752995443863348	490872211599717	1.88917e+16	5.47866e-28	2.20938e-25
TDRD3	2872103171912959	5010065914346747	1.13751e+16	2861792946683941	3.79373e+16
DACH1	-8306621377364386	9516614012049708	48473674758611	3347.53	276246
COMMD6	-8303415033375903	5759422654047579	9083211060613928	2.57967e+16	6408688443033126
UCHL3	-9851084758787288	7000526289033997	4215176491887688	84457.7	609159
FBXL3	-6324305906549817	5002473926146167	5249141316802941	8187833855598552	8663430805626718
MYCBP2	5860297117115499	5658374001055937	7519124454315552	610473448963844	1.38512e+16
SLAIN1	-7718821186204846	5709194226799011	4440201220243118	3.51021e+16	6447285298102357
RBM26	-2.74096e+16	6793930013418185	3872300651000394	4.90892e+16	8609405719546233
NDFIP2	-2.20298e+16	6492580522412761	2.24148e+16	1.34352e+16	2033675094849138
TGDS	-4.16005e+16	4938693684234682	1.95259e+16	1.62308e+16	2.37102e+16
GPR180	2.50936e+16	4859678572310606	5016559775150751	14130.3	120324
CLDN10	-1.13542e+16	6875254397845676	1.16282e+16	6495765958607019	1.84377e+16
ENSSSCG00000009501	3112597464553759	4645481253472737	4538774691624763	5004993344721667	5906868640963616
MBNL2	-2030122154468086	569882682286678	1.04109e+16	3.07569e+16	4015746489458712
IPO5	3.97154e+16	6255966298687128	4951855048126644	2606268886611604	4992947744533494
STK24	3.0962e+16	4941211591193406	1181841730670996	9134304918488192	9402659036337498
UBAC2	7036300704499426	6640436797407318	1.32189e+16	9709970284303318	9786282531114882
PCCA	-6347064758610699	5397262738137255	7505703171038469	7841112236780525	8380932099055963
ENSSSCG00000009523	1331310920092873	5793588114160617	4.74107e+16	4.91104e+16	5820167599374746
TMTC4	-1.34703e+16	6560652145594177	4.10681e+16	1.47013e+06	1.03248e+07
TEX30	2012909519639424	5513327803172686	1.07834e+16	2.92309e-10	5.91258e-09
EFNB2	1.93192e+16	3.84743e+16	1.424e+16	1.60917e+16	5128219899031152
ARGLU1	1.80273e+16	7.54366e+16	1.68972e+16	8965749794767051	9281302499846032
ABHD13	-2.60707e+16	5158282611981214	1.00418e+16	9201783830995048	9449943073803574
COL4A2	2.25615e+16	5426273794563051	6.04885e+16	9380075413317684	9575236023316804
GRTP1	103621659456469	6145791043130436	3.36901e+16	6.46272e+06	3.81574e+08
LAMP1	3677657917031609	7354373353818534	1.05846e+16	1.14033e+16	3065745657424764
PCID2	-1.62556e+16	5415272424732439	4.57814e+16	4.98647e+16	5893689164246733
TFDP1	1906339055494207	5596963458473604	7449050345550035	3.88094e+16	4851744210707315
TMCO3	260893145457449	616890735803282	1.83796e+16	8921601663945106	9244555570332260
PSPC1	390726069626872	7230841966082891	7991939377186238	4698605859088605	1.09356e+16
MPHOSPH8	713010039549369	686435334329085	1.94251e+16	6594021784268231	7331518585179105
AUH	3789487685035268	5715275540757981	2.48343e+16	1.15051e+16	1783623724187655
NFIL3	7897952208017596	4894699772645272	8856325172810916	2.92075e+16	7161701214467404
SPTLC1	-5299399048791811	5045580133672179	2.46368e+16	1165052116094375	1.80138e+16
ENSSSCG00000009610	-247008702259896	5126859497263919	8763324513672792	3.49208e+16	4.45952e+16
XPO7	-442275015300907	5254693110585256	3300043553254623	692780463375315	1.15747e+16
REEP4	1.52284e+16	582822784194283	7594256157710154	0.0292037	0.00377529
POLR3D	-8654844181097779	5.31503e+16	8648395032700643	3273495867298488	794460844099845
CCAR2	-5949469414905189	513687646496649	3526948776237983	6.03788e+16	1.02873e+16
BIN3	-3.78825e+16	5.83005e+16	3.99289e+16	4569264053127672	8100116424842309
EGR3	-1934270099525783	4813310344363469	1.04256e+16	7467802629643011	8077522007636806
KCTD9	1.62265e+16	4764302503388951	2316818604230103	1.48433e+09	6.56833e+09
CDCA2	4872443147699147	462241635918817	1.09201e+16	1.46662e-09	2.99489e-08
PPP2R2A	-4845009994033726	599456933129241	6253820009387097	1.23926e+16	2614715487426986
BNIP3L	-3242237276401415	6687980587569301	4275794271077896	3865889213833912	6994379695006502
CLU	-3.55023e+16	8148604780196585	7739313375158105	540313420052207	1.24398e+16
ENSSSCG00000009670	5.36325e+16	4502471830407203	1.12908e+16	2.26048e-10	4.76783e-10
PBK	9736779281889056	8913882588597357	4.05508e+16	1.91573e+06	1.33373e+07
ZNF395	-2.20467e+16	6173236710354779	1.82373e+16	1768697149311874	2555404714147755
FZD3	-6117321330213598	6.91728e+16	1.28701e+16	3338691109882224	1005527825108728
EXTL3	1.20254e+16	4300077559512154	9725758193986192	1.81703e+16	4686572294417559
HMBOX1	-1016956941933493	6028788446770515	2822436830699302	1.08036e+09	5.55514e+08
PINX1	-3721251930505342	5074690173612991	1.65543e+16	1982214643029739	2808210404575053
HPGD	2.73131e+16	4651452350629445	4.68064e+16	78.3572	62803.3
HMGB2	3879903615809553	978496716362601	5236328581835863	6.85758e-101	1.91177e-98
GALNT7	6199888487303781	4907842354660602	4061642030445412	4386782296802277	7824213654268762
MFAP3L	4284613884774642	5794969783536284	2.83902e+16	9200008871206	1.47772e+16
CLCN3	4956528418770293	5841292897277403	6739035992286505	943255826135024	2.04883e+16
SPOCK3	-1.10582e+16	4.93833e+16	8953232859494973	2.76979e+16	6833356119361358
CHFR	-2893010717076208	5521851415311768	1.81346e+16	1780938817195891	2.56962e+16
ULK1	-1273868939556691	577507656442477	3.01843e+16	3.92878e+08	2.1116e+08
SFSWAP	-4417805219291502	5381349588958594	3554146959630347	5939683056623338	1.01479e+16
ADGRD1	-4454672883318945	7.73814e+16	4344462099169853	1.75058e-81	2.95388e-79
RAN	2.23329e+16	9930890810018908	3928287090762696	4748028277823755	8376655772448188
STX2	1.73382e+16	5196811310615411	5.04674e+11	9943318424954354	9957294665126866
RIMBP2	1.5507e+16	6016932051018028	807873666993034	3.6875e+16	4650841269946767
AACS	-5974431831897531	5.92261e+16	9720090848859964	1.82265e+16	4697266953209194
NCOR2	1.26354e+16	5301625114578868	3.15883e+16	5740922016659461	6568663806356257
GTF2H3	-2546771423144036	5.85975e+16	1.77251e+16	183072358135109	262667254500407
DDX55	-3.15313e+16	5814439334758885	1787760179227762	1811993011103921	2603293566479575
C12orf65	8525264421891041	5515563704502538	1721909046693567	3.33072e+10	1.19645e+16
CDK2AP1	-1445343364692321	6858119906912598	6440229115285669	10.144	111.185
SBNO1	-9080405622406394	5520762403805989	1.46952e+16	1263646267809933	4119217015351952
MPHOSPH9	112055211384641	6327654078584791	5061577969113092	11233.8	964.274
ENSSSCG00000009782	6243474394094887	5717462924422851	1.09784e+16	9218149824073886	2541133992775656
DENR	-512168574691203	7.6025e+16	1732466482090725	3.15071e+10	1137518878717384
RSRC2	-3.44887e+16	7.76969e+16	9285176867962512	2310156150360294	5.79527e+16
ZCCHC8	3.09253e+16	536142594254059	1.59714e+16	2.06309e+16	2.90609e+16
MLXIP	-1.27829e+16	5222875156086816	179221338229206	2.30129e+11	8.51465e+10
DIABLO	4.88001e+16	6696211249971619	1423660448680282	1612041374639228	5132278696219827
BCL7A	-1.58247e+16	6.20222e+16	5844069401618633	20.9512	209.905
RHOF	9083568012512636	6209369151981436	2.82231e+16	5952426318946277	675043465813292
TMEM120B	-2.38354e+16	4753522283930508	3.43519e+16	4.59941e+07	2.76396e+06
IFT81	-1489947214191373	5458639140088912	4.76655e+10	9944914331217762	9957337709520344
GPN3	1.51775e+16	566121389814875	5697045355872292	442.409	430.459
ARPC3	2.00455e+16	8387149359705662	4254477040249219	3914699948924423	7074705770153157
FAM216A	2295070612901733	4656356015998086	4780378647213696	47108.1	38527.7
VPS29	4754611886583644	7681256888547374	1.70114e+16	3.71558e+11	1.32578e+16
TCTN1	7300086897053855	4952252798799346	5.42163e+16	1.98888e+16	3945756954689922
PPP1CC	4780000570193351	7460287324593798	1.43346e+16	1530293637929286	4896328745709871
ATXN2	-5163315121689966	5849328707350015	5415888626892418	8159783575143775	8645163959653319
CIT	3591407615503198	4724254686152705	9926061513669306	2.21367e-08	3.96482e-07
PRKAB1	-8730034807476688	5260754803054375	1.03006e+16	1.32985e+16	3.51628e+16
HSPB8	-8550347917066772	6266133854360953	1.58834e+16	6.73658e+10	2307421335009426
SUDS3	-2573766417071284	4856630787073674	7618956376346269	3.82736e+16	4797855004209393
TAOK3	5556500513506409	5194873816760381	5.3037e+16	2128013475347552	4182962110339823
ENSSSCG00000009851	-2.62363e+16	9216916120749256	7.14879e+16	7501475547246203	1666070703461817
WSB2	-3678329405026505	5.52339e+16	3.09118e+16	8604374041619769	9004610144420754
RFC5	213282244430146	5395189087711171	8731601055580005	9.24961e-06	0.00143814
TESC	-4686042981081909	6476302830612171	2.15636e+16	8.09714e-34	4.12054e-33
MED13L	563643361219748	6.24349e+16	1.34807e+16	2.41026e+16	7455189667572634
PLBD2	1.33117e+16	4901814484626878	2.36808e+16	1.1371e+10	5.09865e+09
[truncated: 4,414 more rows]

## Sheet: Sheet4
Sheet4: Differentially expressed TFs of the 2°NGN3 comparing to the rest of progenitors
Gene name	logFC	logCPM	LR	PValue	padj
ATF4	-2384975288272099	7994016645625769	3.28646e+16	698533521443317	1165798266396292
PRDM4	4286681333327917	5300877826321418	2.43051e+16	1189938821271574	1832785904874689
NFE2	-1233955403703689	7257530485013895	4214727510473058	8465.18	609874
BAZ2A	-4754239763526255	6406331529754229	6557009291082105	104471803067923	224262872872956
MBD6	-2198375238700797	6476108934264821	1.95649e+16	1618893005293094	2367238757112729
SOX5	-399548575074603	7721416079831476	6754795672748369	93496052416629	203219216303535
AEBP2	2450246559962482	5040453622344319	9647456174752254	3259941120237839	4211715184961722
NFYB	1258516081055835	5458408210563012	343601497895623	5577577094783901	643806018573436
NR2C1	-4485610405378029	4901459830655709	2454639157830238	1171780941382092	1810035990397971
ZBTB22	-2162053161865986	5584830788255023	9220274897594792	336943182212194	4330486438854656
PHF1	3397400485027011	6153620431107571	2579282729223549	4.85411e-43	3.34673e-40
NFYA	-1842568471860202	5471169599294126	4228122799766858	5155370965354189	6040979281771027
FOXP4	-8676588885710436	6164580339286394	2.29397e+16	1.67168e+09	7.32658e+09
CDC5L	2232715555592789	7264478835296698	2.67284e+16	1020735717130687	1611264750921212
MESP1	1485300683785488	6734477787417031	1013591804196209	7.67288e-09	1.43855e-06
MESP2	1.63837e+16	4861109311917486	2.80484e+16	1.18316e+09	6.05462e+08
HMG20A	3004146963262374	5087640313231778	1.44927e+16	2286449228626714	3158899920071922
NPAS3	-268018577016283	5900005262391324	83683750974969	927112132297053	949320184012888
FOS	2807725595955242	995684150729302	6529241448146395	106115201115647	227483452901534
FOXN3	-1059659940369444	6378151127418091	2847886150385214	9.47271e+07	4.91019e+08
BCL11B	-2280753040914343	5066330558285388	40835418768466	1.65604e+06	1.15923e+07
ZFHX3	8075208594360518	5715041128154301	1.59612e+16	6.46555e+09	2224092106525
NFAT5	691874454570004	5673224377946085	1.24186e+16	4250701247127	12531262711073
TERF2	321986909603527	4883601618782152	109901229111226	9165076995532656	9423744980012092
CENPT	5438570696377249	4884302850974915	1.50672e+16	1.23593e-18	3.72056e-19
THAP11	3563206889506976	5002167118809359	1.32885e+16	2490106282165472	3391368199074981
USF2	-3014057438424586	6122674981774445	2739714639058408	978822446704209	1556213619704288
FOXA3	-1.40178e+16	5830889233454755	4352759980383823	4180.22	3.08087e+06
ARHGAP35	-1185829913297924	569489638822794	2398981213654547	6242797065588053	7015214648536733
IRF3	-2134665371483436	5662346881327981	1.14365e+16	2848830118206358	378114235519337
NR1H2	-1062638392755642	5376755311250049	1805625351727023	2.14473e+10	7.9768e+10
PEG3	5954201454123377	5807061487916409	8499443502359783	35525511830819	85218698787583
CENPS	2.74246e+16	5924878734669239	1794970358652089	6.24078e-26	2.3819e-24
RLF	-5486707240984895	5142839217879873	4792130984932219	285900343717784	540286768027832
GATA6	-2.22735e+16	6445923591700184	1.04898e+16	1.28589e-08	2.49097e-07
NFYC	2404561162177162	6398499934837533	2688314439623235	1010866957336321	1597259470290905
PLAGL1	4786363514746686	5120156491399979	2.14842e+16	1.20657e-32	6.04419e-32
HIVEP2	1.35335e+16	4231266961648135	4936776596735577	262910229454871	502767787433532
HSF2	-1851875488585571	585600935963237	8253550422760618	3636191150885838	4603209804438301
SIM1	-1155270986912548	7097932754147531	4249069275271182	71019.4	513969
HMGN3	1495860219371461	90372976226996	1.68079e+16	1948188650337621	2766117277671573
SETBP1	-2104721126911556	7254458073303372	114442489413225	2847192630057318	3779751375554353
MBD1	6401451324949	571449722101817	1190769203126207	5590262026261	16073883458469
CXXC1	1.04338e+16	6.07328e+16	3.45273e+16	4.20312e+06	2.53531e+06
SMAD4	-411484210422882	6820408620518287	592556044561938	8076763796943695	856853234050347
TCF4	2235013466069759	7625303743019614	2.90657e+16	882194537844474	142520316872229
ONECUT2	-1213458280371993	4456772636835811	1469948180204117	2253538698753034	311869289745758
RORA	2489748856765465	8306756569939186	2944928480763973	861475124395446	13963039680545
TCF12	-3379737201546788	7790284114063036	4628525423268076	314445777234494	58611230338011
RFX7	-1856788162103247	5475320808116784	631274559526311	4268881822302353	5226669895856919
ONECUT1	-1588934150779351	5557617312374351	2377213422294857	1.08441e+10	4.8932e+08
MGA	-2153028065024393	5590925102685381	1073171894995764	3002300874042518	3936759346495016
MEIS2	1.43095e+16	8545986039947822	4435530421018044	27386.9	20514.6
TSHZ1	1.59254e+16	6159147527826877	9964756009931848	1.82079e-08	3.28871e-07
HIF1A	3356872627198437	6385700100404229	4260732595520986	390030976292481	705068683390862
NFIB	-3618497011540489	6276761168263337	3689007336861099	547722045859096	946042972034706
GLIS3	-1.35508e+16	6636553699773358	4.52941e+16	169561	1.30519e+06
RFX3	-1.5109e+16	8523108311392244	8807347547951943	6.30677e-05	9.91152e-05
CREB3	-127994014476451	6046861940903544	38122693866515	9507670361670052	9651687820291038
XPA	-8861255554193386	6429795638300489	2.92686e+16	6.30091e+07	3.31431e+08
PBX3	-45351118523486	5869952019098502	4903726206659714	267988099177881	511410622597791
HSF1	2207431301370789	5.37159e+16	1.03655e+16	3086262343392585	4023813368408551
TRPS1	9662435931729132	5579390359883731	2520971257830312	5.14226e+08	2.42086e+10
MTERF3	1012992315568781	804585844800756	5769104209691456	4475258917722723	5422403662214305
E2F5	-1707258542508785	5152363981042403	3122713761112055	2.29535e+08	1.26441e+09
ZBTB10	-5943587226016652	5322045954561983	5.91817e+16	149854884457224	308465335197343
TERF1	-7184058297296727	6459469428103744	1709875362888825	3.54856e+11	1270427532681
NCOA2	2124097571303308	5763939663185136	1.10611e+16	2929286048212988	3860756863544025
ST18	-1.6304e+16	5729962533837255	3743841646099734	94345.4	6.05548e+07
POU2F1	2704526566035324	6379453099487737	3343851367971	674565436378583	1131560050181712
PBX1	-4296067286582515	7297510704973229	8228085918623098	412470090105	97592554160638
ATF6	1815880084764303	581755771341165	7930905632085672	3731672400922957	4699957461150658
USF1	-9040239767195868	5010774845365424	1.00523e+16	15215642131068	39724225303098
ASH1L	5566876916786617	6767868962795726	191567449758014	1.20411e+11	4.67642e+09
MTF2	-625343759757758	7536489332502934	2391471463469141	1.00699e+10	4.57606e+08
GTF2B	-6729320189878477	6218385602175458	1.02241e+16	13861642241127	36486391646187
FOXA2	-9475062085285144	7304645662112351	5249673802491662	4309.64	38648.1
RBCK1	2575859581076745	5791893461088172	1.6112e+16	2043230752761827	2882551284204364
E2F1	2.8589e+16	5169378732942141	6967049498035162	0.0700867	0.843144
HNF4A	1293538676217757	6054123108315093	5849736762955695	4443693755162675	5392309681700052
NCOA3	-2551307633122275	5155526008309401	1.00861e+16	3152366166630974	4098331682976035
ADNP	-6122340291111688	6401630318152908	1.45142e+16	1391034460992	4491094140928
CUX1	-1177618571596177	6706448906514095	4791202958086131	4888210568801559	5800001141220503
MLXIPL	-2923604004558281	7231928121273717	4.07194e+16	436011055341885	778313721284012
GTF2I	-3597569783504706	7202294386779268	7729453251648582	54327197850139	124899961496985
ZC3H8	-1216578063373307	637966839136067	4050542678882008	1.96071e+06	1.36356e+07
ARID5A	-4601873270764966	4872492415557371	5.4053e+16	1951.5	1808.24
KCMF1	-2173324646087321	530849562252341	7653144122337086	381670490947911	4789001896210381
TET3	-1.30743e+16	4581843781679956	1.04577e+16	12213988692466	32550330630132
MXD1	-4764758385236129	5083313455181685	3261647796102695	709178294453035	1181104214034509
BCL11A	-3456015208218634	4423536563012625	2853289987673619	5932294854926498	6734751170288368
CEBPZ	-868162985880246	5633642003702961	1450533459295648	7033081028906738	7699524595757214
PREB	-808934485823727	6137978794125121	2132505040129668	6442315345649893	7196537630018661
NCOA1	487987671561618	5733818843164437	654949311018278	7980127849461195	8484261278518518
MXD4	-9036944197148136	5708386353706648	1.6968e+16	3.80161e+10	1354969584173
CLOCK	-179157014507167	6084709225251741	7082235507317609	4000341815151047	4966110744481091
SMAD1	-6829222067317898	5.40117e+16	7079719411011862	7796121690234	172315519744159
TET2	-5209707619020187	5447765585727909	2.9821e+16	841899003485015	1366647192492638
NKX6-1	9089730433393752	6354254385091332	309487055366615	2.64939e+08	1.44824e+09
LIN54	2019255834917603	468141723628153	4354668552727227	41396.5	3.05448e+06
GTF3A	6533309049206704	5207266924607542	7859449128267865	50555793148393	117111179793172
CDX2	-4656505801642772	5.11562e+16	2.60423e+16	1065789296852544	1673320512100518
SMAD9	2.51432e+16	3966456474388068	2.66546e+16	2.43274e+08	1.19898e+10
FOXO1	1.86707e+16	6087100751052616	5939191124468565	129.199	1321.25
TSC22D1	1485728307327846	7393998204507818	1.52834e+16	2163613144246753	301392298086252
ELF1	-1206532469672644	5604784733214789	332493717997588	5641943730146919	6489341922764917
DACH1	-8306621377364386	9516614012049708	48473674758611	3347.53	276246
MBNL2	-2030122154468086	569882682286678	1.04109e+16	3075691049552672	4015746489458712
TFDP1	1906339055494207	5596963458473604	7449050345550035	3880941368795667	4851744210707315
NFIL3	7897952208017596	4894699772645272	8856325172810916	29207499494435	71617012144674
EGR3	-1934270099525783	4813310344363469	1042564913933787	7467802629643011	8077522007636806
HMBOX1	-1016956941933493	6028788446770515	2822436830699302	1.08036e+09	5.55514e+08
MLXIP	-1.27829e+16	5222875156086816	179221338229206	2.30129e+11	8.51465e+10
PATZ1	-1278010952701086	6010254918474086	3703291272104189	1.16152e+07	7.37393e+06
ARID5B	3259554757528741	5651178652255801	2493973623760974	1142828588318257	1774719522474367
EGR2	-9444894270475624	4654460714258726	7.89608e+16	49542082477584	114845926553244
TET1	-1026898316682076	5405776786874547	1.59342e+16	6.55838e+10	225240229157
LCOR	1729801904117979	6051294111217564	7324945835391965	3920757900363827	4893119546869258
TCF7L2	-1650044585457721	5598847300525571	50099354395212	4790638926259111	5708525700645497
AHCTF1	1.15263e+16	5117175060748897	2.02692e+16	6.72749e+09	2.70449e+10
KDM5B	-2.0853e+16	6574403683766936	6.26827e+16	2.42839	259.082
TOPORS	-2043992186809775	6000300764271172	8226521081357099	3644058911509161	4610439175334795
ZEB1	1732565956784718	7232587765702215	1363477809060246	2429356551613158	3322027832933292
UBP1	4536856405659387	5275293684472539	3.14145e+16	763261071793361	126069809179264
TMF1	3149915789549703	5463141998937077	2018205086055268	1554227666168237	2289914475062209
MITF	4586159218302612	5047391412692661	2244896601612229	1340558690624648	2030184002570573
NR2C2	2790807313106073	5244506702870181	1.2522e+16	2631324147896407	3549021968092504
MECOM	-1807759850298819	5692300483306037	5388468004184634	2126.09	19586.9
SKIL	-7378697507049	5220026202142484	9484448754726	9754315667366212	9821713577128166
BBX	3274113833012526	7039042674390914	7577814142052102	59091052945443	134693150190608
BACH1	-744607489044247	5092521295322862	696776313050762	7918067277600443	8439269844410578
DEAF1	5181291743681143	5383723684028575	5953169405000855	146908497750282	30327665408075
NPAS4	3.30889e+16	4144820891500066	3828120557800046	612497	4.03217e+06
DRAP1	-1269861830231889	7420026789063512	9242713744839596	3363559425169776	4323805740615198
RELA	-2504449509611771	5698164884996078	1.56619e+16	2107612840909673	2955820983358011
EHF	-1.22068e+16	5232126367476036	1.38697e+16	1959344854233	6158489806541
PAX6	1055384122241316	8985852435245864	7254114032334193	3943745869264675	491291894628254
TEAD1	-1260313556580588	6867812525735516	5723177593925666	4493393677407171	5442319656126706
MBD3	2475237229122093	6639977873644822	2861968418838812	906964493828564	1459336595841595
TCF3	-2196536370724231	6273161467225148	8614381754430698	1.67314e-06	0.000254826
DOT1L	2584468303716305	5130099818905502	6216083831256967	4304502280226031	5257232118249392
SAFB	-3057691701553427	7319198553555087	6670631663780448	98014444270546	211962433950334
SAFB2	-828366915531101	6055895900203128	2069032614355848	6492054995358887	724200706858754
SNAPC2	840484162863817	5074353148086639	844267457635918	7713857077512436	8280805555166539
DNMT1	1.93627e+16	6542131787737663	1657539369345878	6.26061e-23	2.18168e-21
JUNB	-4537187049218888	765613220070483	5808990910101752	159444407209497	325591572938629
NFIX	-3.00717e+16	547596243088371	7275449425823878	0.00146823	0.180351
RFX1	-399603827928004	4984062923218977	2043349657044482	1528726902121251	2258570713456559
AKAP8	2678653859096272	5881038283872792	1.52002e+16	2176172157789304	3027890108724668
AKAP8L	-356932296416526	6623603060270921	5587120729091401	180930129800635	363561263642015
GATAD2A	-1169560637313705	4.64194e+16	640080857988234	8002696093520506	85040250831378
MXD3	3.86972e+16	6607754891544586	4477643605179677	2.21134e-83	3.93864e-81
SMAD5	-3578039443559752	5868440575871423	1.70819e+16	191221022698122	2725292726251074
EGR1	-371280977201606	881833216540337	597915288275689	8068257415238584	8562341368174413
NR3C1	1.59451e+16	5444495437025645	6484229000443273	0.811389	0.893922
CREBZF	1768279755281784	7096746256417684	2153058967437856	1422861547275011	2131134837918097
ETS1	-1.3927e+16	5825250552971902	2778237422172455	1.35757e+08	6.88668e+08
ZBTB44	-1659996248527755	5.58182e+16	5112110320388865	4746150790183415	5668154007572371
DMTF1	-2397889205578417	5755263450679662	9682454439214504	3251181502396434	4204634084987078
ZBTB37	-33110179993079	5208837284410989	1.56821e+16	2104675942139143	2952993903937896
PROX1	-2.28105e+16	7.71594e+16	1869988668356798	1.43695e-27	5.72279e-26
ATF3	-4732697111288838	6817775671867085	5644571608456552	175094935614624	352942070783078
IRF6	-9803775860102224	5283377824454813	1.47611e+16	1220295330147	3981950970434
IRF2	4072940635695835	5.33832e+16	3498160152548923	614370472024295	1043258333320917
NR4A2	6219203619442788	7070718285039244	1872539258275827	1.50959e+11	5.77314e+10
BAZ2B	-4005566159991067	6729723609813064	7849403979667109	50837464533598	117678636313875
SP3	2114223213144061	5982321699045087	1512477651465776	2187614076767741	3040091343787333
NFE2L2	-1.07884e+16	5854331974929479	2.08253e+16	5.03131e+09	2.06271e+11
NEUROD1	-1.12491e+16	8228229001410968	4366686680164285	38930.7	2.87917e+06
STAT1	313522458814855	7040951876698367	268191809552718	8699156510906456	907713450739336
ATF1	3182958443191333	5099261703308899	1.09235e+16	2959517000795947	3891003282571993
HES6	-30128851742965	8493407489006513	3045588398126643	3.3464e-53	2.89961e-51
MNX1	-6806034911446	5740409161331186	10263534568331	9744427423447356	9816381561530944
CREB3L2	215130709263713	5213458164265256	7037928921215268	4015121548962594	497968266381976
CHCHD3	6339149363256362	4792392207520055	2568141073085471	1090357931514078	1701064490722206
NRF1	493789424544679	6131667852866436	5249494469236774	219531480607353	429550153693728
JAZF1	9622996827228918	6390251595362972	2551505542362686	4.38944e+08	2.09102e+09
ISL1	-1606980375498946	8880948125440211	7152328919632035	0.0274005	0.33529
GPBP1	1372578621661506	6962563935341638	9479125995384656	330251196857894	425727920034744
SOX9	-1.31668e+16	5803846939954217	2.25067e+16	2.09407e+10	9.05408e+09
MLX	-4383003291630303	5174928042922733	1.09959e+16	2943551973197705	3873989922311307
STAT5B	-4773101245683547	6002669825645563	5.96265e+16	146120218000945	301843697751953
NFE2L1	3574933091497698	622191091813573	5280722889649381	215627935922494	422944730845834
NME2	649264948732081	8697927709413907	2670894964087473	6052908787684003	6849850184721114
VEZF1	-7978181103103015	6480324764209927	2044310206414802	6.14306e+09	2.48827e+11
SGSM2	5897856355406063	4994186548929147	5.76084e+16	163872512244967	333254217733819
CAMTA2	8455786499644433	7588340426824545	5095484726064695	94.5153	8189.62
TP53	-1368557769248377	6319364748557492	5438479812524841	1648.33	15384.4
PRDM2	-5566875277540771	5.61403e+16	5402919622973453	201030950290929	398457636248976
ARX	-5241616613678726	713114447677274	3836979864233479	1.94922e-72	2.45067e-68
ZBTB8A	3267265273571613	625144352054818	3.41362e+16	646603885767493	1091346174135606
PRDM16	-3.01025e+16	4808302228278965	3.98743e+16	270841	1.85339e+07
SMYD3	-210286390373607	5.96241e+16	111951397159151	9157354135326724	9421847675820756
ZBTB38	4771890670477955	5238423348341211	3931780823159047	473817443535953	836716454958009
RBPJ	-1.07109e+16	7101937595481552	3547059233616029	2.5893e+07	1.59029e+07
TBPL1	-1364162260103568	6353972302337405	4.98072e+16	16962.4	143676
HNF1B	-1.21358e+16	5626728119695996	2537311112184581	4.72458e+08	2.23902e+09
SALL2	563350718604652	4735082645496863	214132038275174	8836589018800581	9177588792896828
NFIA	-1724519243698996	7589135109224488	1.08631e+16	1.9546e-09	3.9787e-08
FOXJ3	-3450918255053337	6062786507974392	2255735805712272	1331201681563345	2017887749925335
IKZF5	-1562392817146412	5867986998170274	5099709405428587	4751514359697272	5672446485641204
SON	-2531648217440825	8965124433481376	5879666126810321	153167258670681	314576701664447
ZBTB1	3943681973113946	4928651304935024	2228109428132484	1355195810203424	2047965009433032
PHF21A	1332469585731282	622176394892572	4936024062205124	4823247392466873	5739915048347735
TGIF1	-3595416275233477	499852944967224	6996921988736453	4028871392102939	4992466133934529
CTCF	3425281452648571	6471974153590461	4865211766846937	274034352112613	520906056125883
LYL1	-2622569228684244	5761113980187367	7796748737278416	0.0104751	0.139929
ETV1	-9298433222425628	6937257765924088	1630801716889178	5.38357e+10	1867935649421
NR5A2	-203780610840789	4942967456412199	3.11382e+16	2.40294e+07	1.32141e+08
KLF12	5078580323622759	5590015773256235	6700098264024756	96407597934822	208980905327274
MAZ	1.61865e+16	6751616884634518	1546166415115409	1.69813e-19	5.26009e-19
TEAD2	-4040203590216174	638637953997765	1.78377e+16	1.09608e-25	4.13417e-23
CXXC4	-1636694620175814	7426578665102104	6775385166602881	4104356177983166	5065857904374987
KLF13	261634382502927	5316757479525802	110702767470982	9162049048794464	9422142502144364
SREBF2	6543814658268329	5560752516291996	1.07319e+16	10530143387693	28549378182617
ZBTB17	-1.13051e+16	4.97514e+16	1341534590688025	2495741371736	769360272864
ZBTB20	-528070146928392	8049758582805467	1485978098511324	6998789587706009	767257890120947
ZBTB40	-8701853627416752	5327440855251352	858833725567741	33832278387633	81768778372221
RORC	-1.08215e+16	5241654351367908	1.46889e+16	1267933882586	4122714023905
MYNN	-5621334776153143	5407384756894047	4486304916223638	341674529113859	628822353811156
MSANTD4	-9097172884905884	5479025184985112	1311366417880988	2931497602792	8916870317412
NFE2L3	3587908319206738	4.76144e+16	6364197721012523	425010230866272	5209645575061244
KLF10	-1.43359e+16	5881411779906403	2.35265e+16	1.23203e+08	5.49742e+09
FOXP1	-146914586450402	7981872623334415	974512179761824	3235574265567529	418782845999576
GPBP1L1	-1438630552675143	6401023166389986	5612898262328354	45374101835175	5482169605561374
THYN1	7723559533111546	7395889848244963	2.53749e+16	4.72032e+08	2.23866e+10
DR1	-9797218101586248	6162083153426558	2749425886495694	1.57562e+09	7.94874e+08
YBX1	-1782380025088549	9779520212704906	3788430695572948	516080127767865	89945794488925
MEF2A	-1915202561496926	6753356210193402	1.85769e+16	1728912694134477	2504696835695949
ZBTB7A	-2640368476957071	5163174482604721	7595823600996585	3834592535851643	4805043451217654
NFATC3	-3114150939871797	5959203080712452	1.89885e+16	1682071628159703	2447343607842073
ELF2	3899301305511837	6726885225460594	6.02789e+16	140815767825032	292393362465708
MAFF	-28593889138672	4347041801220078	1945816637505	9888704672030882	9923708892806644
TCF7	-5667654349057824	5628506384094766	5495153241941118	190692564597817	380554224774729
ARID2	-1320746589151981	6094408816654753	5715618655331287	4496389393151419	5444919506871936
XBP1	-2277172759460048	7596937988953671	2765983645990648	962874838986207	1534141174469391
TFCP2	-3387506650037116	5220109794776739	1.52223e+16	2172828239741423	3025445097333769
NR4A1	148296114786573	4790451530168806	1544165311886907	8.50919e+09	2870117958958
HES1	-2215761103036177	5267660753357397	3505644257728445	3.20286e+07	1.95588e+07
ZKSCAN1	-4095660106284095	7029624121070097	7908783776902492	49195333107507	114165934088069
FOSB	938213065909852	6523399030620885	3655212534120558	1.48638e+07	9.36214e+06
C11orf95	-5206832000606438	5341422554242125	4423818423777777	354406430505475	649829577466716
TCF20	1443825761099505	508016027833957	3094807991375905	5779989625895047	6600408456142305
CGGBP1	-3532126019331252	7295565585187938	59124425483854	15034312102387	30937101797338
ATMIN	-7890461351446997	5066569772789326	7007176532740024	81183612872011	178882929805957
KIN	-5490451406729976	5789112515179599	779915789724022	52270589086472	120647594392535
THAP7	1027515268703064	5.6545e+16	276013566332395	5993260509859987	6787139948643983
MBD4	-6963332572328429	6029740244752733	9731722173402622	18111470981394	46751510439896
ASCL2	-2991446224925287	5896474715978438	7482944679935866	0.00513185	0.0652886
BPTF	-796678638688432	6780171890897291	3502747997502649	5539576138147164	6406883513311619
NEUROD2	-5564437755465579	4797672015937704	5905844509754971	153.058	1552.86
REPIN1	-8611752577156858	5259022250826064	1.00139e+16	15536614974718	40463353053572
SOX6	-1445223874519161	5863844188335061	3412499536730209	5.16831e+07	3.08559e+07
CREB1	236223389751102	6195715418397808	157392837256953	9001623175531643	9301207744240402
SPEN	-2478977178715135	6292826396459549	1.97489e+16	1599297734452856	2345539129302771
NEUROG3	-5255169684863464	1.08387e+16	5784048613501084	8.3379e-113	2.81382e-110
MECP2	-602252391319412	5.62912e+16	6810037741548099	90646848927507	197389856838514
IRF8	2358558778414799	6177350700107059	219246756267392	1386869775638807	2085508677625711
KLF6	7108346847837833	5009058634679193	4162852398529797	413197642894346	741512254754702
ZBTB18	-2.00277e+16	6351470231551879	8806385164411344	6.33753e-06	9.93551e-05
MAFG	947215489471029	4333246576167945	2.43803e+16	1184250668154738	182621820207027
RFX2	1729716401646534	5071197686905216	4101248259349397	5219061554469485	6104455068817647
PLSCR1	4258153090243004	5208483600155207	3.34361e+16	674665326239034	1131560050181712
TERB1	-4618297397675432	6001549867669353	4354962133054515	369012795991703	672381371951919
ZBTB45	3614034670511464	5249850824777391	1413790899263602	1.32938e-16	3.64273e-16
HBP1	-1.17269e+16	6239147780068325	2855821010467828	9.09235e+07	4.72751e+08
PDX1	5057572426013048	7927305275604082	2157491182764872	3.40274e+09	1.42511e+11
FEV	-1.8677e+16	8084535210582638	1.42951e+16	6.02593e-19	1.67265e-15
TGIF2	-2.31861e+16	4678638135756212	2.37489e+16	1.09757e+10	4.94564e+09
THRB	2.11231e+16	5308540326275479	6970205757355922	0.0689741	0.83132
HHEX	1.33026e+16	5455124652911525	8315654898119348	39304830003945	93549662969174
ZBTB5	-104590703490305	4408275476370763	5368005692863612	20509413972107	405883834534414
ZSCAN2	-93799630258634	5598982917208608	21107888018532	96335542495053	973527972384996
KLF3	-5027011387417909	5980444337482598	6111184831876116	134329049071187	280194490125065
NFIC	-2796430028965391	6807675397602396	2800139744764941	94256091346282	1507909325629642
RBSN	-667781771825987	4955180730564918	5192968591056088	226784460425679	441317742109091
CAMTA1	-1151789827386777	743920860005153	9954269729520132	3184195824472141	4131336225519095
CSRNP2	-9983323264999708	539455381245879	9694989386060876	1847711497967	47504114374357
MAX	-6912976406581712	6427258123807839	1886929727954885	1.39988e+11	5.3813e+10
YY1	331210076422692	624058365587025	3.72993e+16	534455062027011	925945922106781
SLC2A4RG	1938022826204968	5015535915990147	6.31204e+16	19.4452	20.8849
ARID3A	-2612284057711367	545856674047281	1091188737667732	2962079730754272	3893574258629847
TFDP2	-1.51258e+16	6234257612378172	5727826460791863	3.78313	372.047
PKNOX1	1.01887e+16	5293691093716227	1.75919e+16	2.73754e+11	1000175622797
CXXC5	-2930057457151204	6180292592247183	2.72034e+16	990766475596787	1572084791271121
ATF2	-5445004020091521	5852575889117164	6314149564990853	119778181730863	254310497105395
THAP5	-8377800845043653	5.53241e+16	1.31505e+16	2874449763716	8759967625928
CENPA	7658702784925574	5463430371424469	4639445158334514	6.66046e-88	1.25608e-86
NKX1-1	-2842127900890205	475905178660946	8215938770012778	3647145654735432	4613434195731621
ETS2	-1040105993535977	5420680929422068	8998673134799969	2701756941046	66876557257404
MEIS1	-6358478503342871	7335599686464869	1.38913e+16	1936885456686	6096862812114
PCGF2	1486804989223798	5941293767533423	7190212549008299	3964651430397152	4932352536225561
RFX6	-1969536326736009	7413179403410504	1.62871e+16	2.66954e-22	9.009e-21
PIN1	1005367377253119	8018234697810552	9385974259569538	3326388090171619	4284612381313865
MYCL	-4854355196071522	4804227658820899	5806892533237023	253.093	252.777
NKX2-2	-2205328003762125	8562628378175864	2983154393587074	7.6698e-52	6.47089e-52
E2F3	2597008561115225	4603940365041008	4074328229921399	1.73599e+06	1.21255e+06
ARNT2	-1.18511e+16	5582354770341963	1.64767e+16	4.92526e+09	1723839383605
HMG20B	-4529858880963585	5.90443e+16	579122779225653	161063364814414	328583612850788
EEA1	8906643810634597	5236003925298601	1.08065e+16	10114548462574	2753905933844

## Sheet: Sheet5
Sheet5: Differentially expressed genes of the 1°PEC comparing to the rest of progenitors
Gene name	logFC	logCPM	LR	PValue	padj
FBLN1	-1.91565e+16	7305937799377436	9746701334328244	1.79645e+16	1.68533e+16
NDUFA6	1.11523e+16	7851515250282824	4647333471403204	3110182520474443	1.55509e+16
SNU13	-3062040391771315	8155929548807157	6967972888315807	4038619487287641	736501750186724
ST13	2745988311264838	9357300858816136	8168677322341966	3660975618417215	7021049131211097
TNRC6B	-8010755799801129	8050175607889722	3255915832324124	7116617172482095	2767190092728996
ATF4	1.34523e+16	7713998866871528	3.80939e+10	9984427168910816	9999651191641896
ENSSSCG00000000097	-7054739828002099	8176211378177886	3744893349922418	8465538827635948	9573147013314448
DDX17	1.71291e+16	9030841821522284	2536659258909264	6145055335281905	8693865598960063
KDELR3	8148187695821001	9425698782604988	7226951251901877	7181706827948137	5291783978488101
POLR2F	-3842582341901324	8293386463909954	1.17608e+16	9136410180143760	9735519044415484
EIF3L	8142307516647521	9005651236807573	65496833541842	1.04903e+16	6967997968537781
EIF3D	2698065206922376	7652864719178522	3.0733e+16	5793231045071536	8468819680345538
RBFOX2	-1.30473e+16	7512197805108223	45506544369594	3290616684573215	1.61863e+16
TUBA1B	2264117863089541	1159687429730983	7324284354567894	3.92097e+16	7222842583465937
GPD1	-697388615585851	7401166493208479	1.73119e+16	1.8826e+16	4958501290371843
SMARCD1	-3.01338e+16	6630752880398953	1.02217e+16	9744948804751608	9947171522517064
TAMALIN	3.61732e+16	6804496753348693	1.66464e+16	4.50358e+10	687888763999204
KRT8	8545030078843887	9826101461987112	659872131984933	1.02052e+16	686087890984629
KRT18	1.24643e+16	8395348591540936	1065517489069776	1.09763e+16	1.09763e+16
PCBP2	-5183469006366207	8509813436765546	1379402078289198	2402030213964087	5800953293804679
HNRNPA1	2.47188e+16	9932552481981794	83751147586519	360109461190833	6987198500717655
NFE2	4756514003447643	7858510373509133	1.04389e+16	3.06919e+16	6457711600963029
COPZ1	-3849248951946615	7249652289905512	4945037127697418	4.81925e+16	7887623860795546
PPP1R1A	-3185048165973848	7571767748408296	1.79088e+16	2.31744e+11	376584248046176
BLOC1S1	4579706189933713	7.54977e+16	3.25487e+16	5683288146360339	8406069614573988
CD63	-8315188273200255	9377598412868236	6058071282525574	1.38429e+16	8569401142548123
ORMDL2	5283332976315455	7503461786180999	1000137038620016	3172773508006408	6555684744942932
NABP2	4.82213e+16	6982608873854713	6935393099927158	4.04963e+16	7367381961433175
ENSSSCG00000000394	7128932581252458	8940279400927853	4807792103274715	2833132195762967	1.47323e+16
ATP5F1B	7496933326425821	9857907757738656	6549350143881227	7980149417983162	9326786370497836
MBD6	-3484133587705907	732629969320094	4255803051418725	514165632614429	8094995253964195
DCTN2	5970325772842097	7341775682951526	8629690868917312	352909145470539	6928744819378435
CNOT2	8030451757859527	7.36017e+16	2.17676e+16	1.40109e+16	4.15821e+16
NAP1L1	-4.94761e+16	969719535760595	2.77838e+16	9554486531292276	3324888238422934
ERGIC2	8839960029045654	7672599097227808	3492347567815951	8517561024964998	9580940089886464
SOX5	-1.54202e+16	7309549031746913	636144652200266	1.16626e+16	7580717582904593
ENSSSCG00000000576	-3.61376e+16	8733354257851659	7447652853869205	0.0613635	0.069801
ENSSSCG00000000611	3.12172e+16	6661459971822818	1.12869e+16	7369007010856977	9219656965595468
ATF7IP	-1.96343e+16	7124401166629135	1.42675e+16	705636430498817	9054773756742872
TPI1	-2.18792e+16	8424968359163543	3715804247019886	5421440591202685	828736816534559
MLF2	-4731234468543866	717308814926715	6173409939961889	4.32037e+16	7524474048189241
GAPDH	-2.06843e+16	1.06928e+16	6623681357661226	4157251451749338	7423243285553447
ENSSSCG00000000697	3.9888e+16	811468898354445	1.13956e+16	2857461711067555	6319052629578311
FKBP4	-4098852145569281	7.11528e+16	6063209086953583	4.36176e+16	7545380213525085
ATP6V1E1	8579542368354793	8052281583875407	5.10855e+16	2380821452800056	1289611620266697
KIF21A	4.52501e+16	6847095239038593	3.98647e+16	5277886319219384	8165753124685733
AMIGO2	3241266032057152	8231434586055446	6888884196470646	0.104173	8.61791
HSP90B1	-3.53819e+16	8989284998842157	1.16921e+16	2795646016436717	6227754895856579
ARL1	6549665268186709	7205165592426672	1.52056e+16	9018609165663052	9701079895717936
SLC25A3	6596327862437583	1.02029e+16	5377706148953898	816616603109695	9418518489604848
SNRPF	-8181136993538929	8348392402875936	5002436101227282	2.53117e+16	1.35095e+16
ENSSSCG00000000905	3891165761896404	874636392694136	1.18774e+16	2.75786e+16	6196671033667913
ENSSSCG00000000908	3192694110559956	8864630273505226	8982867659609612	3432415078704889	6819864021007531
SSR1	-1366103372349007	7438742319663824	6938353576277063	7922364743612585	9324771086614342
DSP	-509601204758387	7281830107375135	8178615956341018	3.65806e+16	7021049131211097
ENSSSCG00000001038	-4.32587e+16	8825611144481792	1401009302262095	2.36555e+16	5725125926070198
JARID2	4042430577457053	7718398353907912	4.39886e+16	507177446490871	8054650546364619
DEK	-7749520782839382	7.98984e+16	2685150687180249	8698379762931914	9629593168209296
SCGN	-22085233882729	8884725946268276	3061344570045402	3.14904e+07	9.88147e+08
H1-3	3.05638e+16	7051799443602694	3.09997e+16	5776817836726844	8451614519970142
TUBB	2180101160039967	1.04935e+16	7.23312e+09	99321425256896	9999651191641896
DDX39B	5453986079819915	7373418833676692	1.06045e+16	9179803162464888	9758902894676456
PRRC2A	-5369375667826768	7020036150378931	9521197156679872	3.2918e+16	6686475417088555
BAG6	8575426873515307	6875129127021481	1.82006e+16	1.77307e+16	4.80205e+16
ENSSSCG00000001414	8529349930082627	831385768047817	479420426270285	2855564429434485	1.47646e+16
RPS18	2529200364200985	1.26092e+16	8.71896e+08	9992549724223772	9999651191641896
PFDN6	3609148302039834	7723934460071826	5674860992954252	4.5126e+16	7658383984023903
CUTA	-6515500831105753	7233689652061805	1.24301e+16	2648912087872215	6079470365608363
SNRPC	-8266233938480472	7130306166129872	2.26131e+16	1.32642e+16	4036927085985236
TAF11	-7705700884996254	6816570365738144	9044639711352832	3.41588e+16	681206420787483
SRSF3	2.26517e+16	9727702302124100	6373345217014337	4246776567927718	7504012964687813
MTCH1	1.1179e+16	8593318136222912	8183463299040739	7748263983861902	9303305922830334
FOXP4	1.06756e+16	6883240824818121	2.96984e+16	8631763906313624	9629593168209296
MEA1	-1.83312e+16	7495807547080879	1.06263e+16	744439954406	9233721183770076
ENSSSCG00000001696	-3272969991660495	7912569044139046	6192944830911069	4.3131e+16	7522044675291581
HSP90AB1	5313039953938168	1106160857192071	4432478996837476	3.52613e+16	1.70227e+16
CDC5L	-1.0046e+16	73740104870095	2523270212580872	1.12178e+16	3.65988e+16
RCAN2	-5896198689882825	6889899785938413	7940689543386004	928994055641897	9790209503579922
IREB2	1.19788e+16	7307918362319132	4024024053507347	8410115909241087	9533072482656008
MORF4L1	2.221e+16	8839343036501042	3.71679e+16	9513866786679184	9862090552008988
TMED3	-273907246086156	7556524207282339	1832699059790484	1.86052e+09	313532861874564
ZFAND6	164152549039154	8527093993969336	2334501634298628	6289773015415205	8785386809175254
MFGE8	-1.09432e+16	714283649580685	3618476193443344	5714118790638181	2.41292e+16
IDH2	1.34937e+16	876199402562071	1.5705e+16	7.40285e+10	1.03223e+16
RCN2	7655097962277086	8532612990864203	4590281635547482	3215373042649395	1.59454e+16
TSPAN3	5096230329460578	9016800319767512	2.38113e+16	1.22809e+16	3900728652498334
NPTN	-8849276278622878	7351381427812184	2.54746e+16	1.10472e+16	3627930981416773
ENSSSCG00000001930	1.12132e+16	1.05435e+16	1.8649e+16	1.57133e+11	269794106526729
PSMA6	1.78734e+16	7.98943e+16	1961873433360184	6578160745938626	8851753351459944
ARHGAP5	6317394883093748	7586849763535858	1385145034462898	906311559430601	9701079895717936
HECTD1	6520179297992145	7.3111e+16	9685167265609484	3250503817759427	6659908500094825
PABPN1	-2.90464e+16	9084715869524192	8871081609589955	3.46262e+16	6843767927359156
SLC7A8	-3.69319e+16	7218148280228521	2.83082e+16	1.03456e+09	2.98873e+10
ACIN1	5662241863474898	7138121819985534	1113970255977904	2912205285268507	6371087086572571
MRPL52	1053618272574807	720302622384649	1.9432e+16	9888779381671932	9982018011449204
OXA1L	5803336087822709	7845655761492172	1.1885e+16	2756319995383394	6196671033667913
DAD1	-1.2547e+16	9051013992798592	1.57835e+16	6911574857441871	9054773756742872
NR2F2	-3577066593301663	8303538688881195	5388416277486329	2126.65	117288
ENSSSCG00000002266	-1.3953e+16	7909563419168271	1.10991e+16	7390182908294327	9219656965595468
ERH	3.58379e+16	968123237669519	1358304046304844	2.43832e+16	5831452709064592
NPC2	-2640950631204198	7122188576489245	2546123609703981	6138459349296148	8693865598960063
YLPM1	4.72901e+16	6961135682254109	6812528427434732	4091556458320459	7396682358723088
GSTZ1	1.56634e+16	6328420344566447	2.3325e+16	8786149817226159	9652614996484032
AHSA1	3.02944e+16	7840070722993292	4896799011152393	4.8407e+16	7903612824000994
ZC3H14	3392622841661838	7203615331918768	4318870625453044	5110644452317662	8074743647555587
FOXN3	1126807087986435	7173687796096207	4219741382675335	837243924543219	9512163385852208
ENSSSCG00000002449	6474997595270214	8878524284797109	3561190591442136	5.91453e+16	2.485e+16
CHGA	1.17127e+16	1.20565e+16	1.09704e+16	7404809937354285	9219656965595468
ENSSSCG00000002459	-1.22374e+16	7435448333942283	5.29516e+16	8180047024793904	9422585813370192
DDX24	4295456740134379	7019158158265336	6268650109833502	4.28508e+16	7517154416582094
SERPINA1	1604196582950764	9295997516164098	2931685795729555	956819604893051	9900009556028156
GLRX5	-5869476898978535	7352322767409125	1.12074e+16	2.89758e+16	6371087086572571
PAPOLA	1.9387e+16	8335709854141438	297573476464172	5854076471200148	8480099636293478
HSP90AA1	7516036287273078	1.01407e+16	7.62107e+16	5769024943136057	448521057217584
ENSSSCG00000002547	-1.25303e+16	7207046148682691	4224840331540092	837146996804427	9512163385852208
GSTA4	-1.88804e+16	7832050040718458	1.70863e+16	6793455803604199	8959485190260611
ENSSSCG00000002639	3.2032e+16	9276014785101940	831734979845295	7.51586e-05	0.00977062
TRAPPC2L	-6157975851707863	7.36904e+16	9137729803290592	3391153139798601	6774861376985131
APRT	-9947401463536640	707206000248644	3298728340082923	6933353919839616	2.73315e+16
MAP1LC3B	8567001324897407	7551031675162736	2513792811104487	8740238578890969	9641546692247684
GSE1	1.82356e+16	7.57316e+16	1202366639820966	5252926981922844	5623721827705633
CMIP	-1008524541175439	7615433855477974	2.6467e+16	8707650931931171	9633978376954508
TERF2IP	-1.085e+16	8143165910349001	8234926737353176	7741386444240457	9303305922830334
KARS1	1033872705376786	8963783869143107	7292232443387903	7871284511191409	9324771086614342
GABARAPL2	5406076142061687	8568081140532028	2565720356276381	1.09203e+16	3.60681e+16
IST1	-4055060465664328	7191284950912367	5230536626388966	4.69542e+16	7818392581137351
PDCD5	-1.60058e+16	7683376030167025	701204627208587	791161467308537	9324771086614342
LSM14A	-6771500840470209	7702444013774461	1.97739e+16	1.59666e+16	4470636518668635
GPI	-4834615938626236	6941596660193031	6023281848934237	4376910943301632	7545380213525085
ENSSSCG00000002907	1.84056e+16	9586969456693768	429349165399155	5123084757557193	8079735059578935
APLP1	-8614467126024657	713042225054791	2.76072e+16	8680355943354096	9629593168209296
SPINT2	-4.35444e+16	8256581229293532	1.4431e+16	2.29639e+16	5617501694085074
ENSSSCG00000002963	3026730621331309	9275674895218996	1.04582e+16	3.06471e+16	6457711600963029
ACTN4	-9383911596241720	7184134089121961	2692493840852359	1.00822e+16	343625221528175
ENSSSCG00000002972	-1.28802e+16	7262172791804691	5238009109073405	2.20985e+16	1.21877e+16
ENSSSCG00000003042	6387476639586762	773880438513579	6645243484406009	4149672074951728	7423243285553447
ENSSSCG00000003046	-5568600267476628	8718088800342386	2.85641e+16	9101035985424616	3.24146e+16
ZNF428	5049274166439456	7504692730433086	9377886938774632	3.32847e+16	6728395165483618
ENSSSCG00000003086	4952495471689109	7241260902529324	8430066580103088	3.58538e+16	6971577639434232
APOE	1.4517e+16	7049369482814829	7283399770465135	6959469749816947	5.14888e+16
AP2S1	-5442815317867574	774924166103669	1.25663e+16	262290704371178	6050083375345561
TMEM160	-7043582986515855	7148111511896535	1.82507e+16	1767109014125254	4.79305e+16
ENSSSCG00000003132	-3489326862776085	7916054538762267	6928224764213681	4.05206e+16	7367381961433175
CYTH2	4278654625239291	8242901613757262	1.47634e+16	2.24349e+16	5540221920849566
ENSSSCG00000003165	3.86987e+16	1.28568e+16	2.1559e+16	1.42023e+16	418451589890808
PTOV1	4446195017674089	8778846480153328	1.81343e+16	1.78098e+16	480916644461629
ASPDH	1.48566e+16	802758781676097	1.31009e+16	2951605100591967	3.39675e+16
ENSSSCG00000003261	-6996216271537341	8323174171227981	3.50576e+16	6.11556e+16	2512487457593773
SDF4	-3402482269927337	7.36302e+16	406374092506552	9491712997855856	9862090552008988
RPL22	3035604758118373	1.14271e+16	9634083449575056	3263296390618229	6670555135168591
PARK7	-1.08435e+16	9199064717805652	1.29748e+16	7186938098042654	9142415949219856
MAD2L2	1.85843e+16	7697316576787846	1.33801e+16	2543071393582886	3.02509e+16
MFAP2	-2.16568e+16	6982831719431401	1.02646e+16	1.35607e+16	1.30585e+16
ARHGEF10L	3.59257e+16	6771086030086818	1.94331e+16	6593363795930953	8851753351459944
CAPZB	8953700887590135	7895721468157932	314570704736574	7612700045519344	285672455316396
DDOST	1.05744e+16	8387649537570072	7745982823573927	7807697502656484	9311932801333420
HP1BP3	-909880271258057	7445575733628755	2624938360168283	8712927696959956	9633978376954508
EIF4G3	-1.28489e+16	7962414339450254	821945971184525	4144353737248713	3428510818996663
CDC42	-4.85436e+16	8622790800988954	2.02621e+16	1546061591267616	4.4076e+16
ARID1A	-9850973021942512	792459471859905	4768222176984472	2.89897e+16	1.48715e+16
NUDC	-2174066456209935	7223503997273378	1.60961e+16	6882734835802401	9043187284499728
EPB41	4.16883e+16	7001885537537038	5728647241411089	939667460410072	9823060183494148
SRSF4	-5477388644334978	7890586715117872	1.52323e+16	2171311843385489	5458270103538108
PUM1	-1.34092e+16	7204899782277849	592865158578908	8076272055430093	9369028483069132
SNRNP40	2.89245e+16	7288359136869973	2.09873e+16	6468667463756832	8831939072796275
EIF3I	7633307871443848	8144120636442386	3.98873e+16	4580562115250473	2098585973844786
HDAC1	1007081662335692	7402601635996055	3.92148e+16	8430236326979286	9547622971438892
AGO1	1.18691e+16	7705011522539016	6.26142e+16	1.23395e+16	7912129272140048
SF3A3	3.24839e+16	6880884293034715	2584800803613785	9594522705906764	9903338448282368
AKIRIN1	-1.37795e+16	7799172884807179	8926780574190474	7651100606603923	92834107083078
NDUFS5	3889545294321553	9264659382297640	1.43691e+16	2.3064e+16	5631781551832635
MACF1	-8049398523283864	7219096166813561	2174856129788044	1402826343769558	4.15821e+16
HPCAL1	2900457242677077	7378464653861297	2.47791e+16	6.42905e+08	1.53959e+10
CAP1	8098909838793084	7367339141776297	2.00644e+16	8873574981598384	9653261486257656
ANKRD12	-4309194865924572	7083656064653637	6432482561454298	4225369984611902	7487997441084383
MYL12A	-5015768731321568	8791820631888328	1.5244e+16	2.16956e+16	5458270103538108
SNRPD1	-3130434068938064	877477420940058	9167149112442196	3383390102535624	6766780205071248
NOL4	7238454041760408	7.6655e+16	2.27811e+16	1.31212e+16	4024157358685722
GALNT1	1.31559e+16	7255405446638107	5959144609775091	980524487646423	9958451827658984
ADGRL2	-4464941087875792	6828529280796109	2.09539e+16	4.70472e+08	9.40943e+09
FUBP1	1401897531678175	7.42415e+16	7475556143550222	9781873863023632	9955840348287992
SRSF11	2.20908e+16	7.94919e+16	2.71783e+16	6021380138912787	8601971627018268
DIRAS3	-1.83008e+16	1.09741e+16	4849599433790941	486184214228245	7914626743250499
SERBP1	-5742471308145702	9527216555961316	3985548569621685	4.58922e+16	2098585973844786
JAK1	5917030774551811	7769957490366577	1290501649352081	2559555236601315	5964505094426851
USP1	2635152294029323	7082346768282439	2.42909e+16	622112809203666	8746054716807158
MAGOH	-3838856772303055	7.96108e+16	6214935816574991	4.30493e+16	7522044675291581
CZIB	-2.45233e+16	7392809021474005	1.78752e+16	6724478318533781	8920287439150334
TXNDC12	-4093203287978838	7110848562337991	5564429527289021	4556969918595225	7665143485991969
CMPK1	6277591553758622	8361554497571689	3.25349e+16	7127134852255576	2767190092728996
LRRC41	-4.07442e+16	6715681567290471	3.25581e+16	5682730367795396	8406069614573988
PRDX1	3.13201e+16	819449326560935	7224303015686662	9322646502469148	980748709190863
RPS8	2173902279637746	1.25905e+16	6621939193833581	4.15786e+16	7423243285553447
HYI	6460926585237909	7971385962401717	2.70431e+16	1000773620788529	3434519205153728
ZNF606	7138147368657136	7001099294181768	1.53185e+16	2.15836e+16	5455845608066402
RPS5	4908339066223511	1.17334e+16	3.01394e+16	8255123594964116	3029097770732801
QKI	-1.78391e+16	7351216424631514	5547628201758026	1850574678899361	1.05581e+16
MRPL18	-690511655761059	7673964203716855	2.06602e+16	885708462221815	9652614996484032
WTAP	8048942025356678	7206934688935953	2.09897e+16	884806894963982	9652614996484032
ARID1B	6250822081197984	8554308642124983	3506991251572005	6111034125113084	2512487457593773
PCMT1	-275033700945638	7635032646015216	2596963012581024	6103288766673274	867811371511356
CITED2	6981525284960247	8282869966414008	2.35853e+16	1.24599e+16	3941210944331093
BCLAF1	1.41189e+16	7.90181e+16	9635788943844780	7562448778128503	9270628095429092
RPS12	1.14722e+16	1.31914e+16	2.01686e+16	6533630081296791	8851753351459944
KIAA0408	7276445421499781	8137323575186562	2.00781e+16	1564910131859414	4422572111776605
ECHDC1	1.75694e+16	8186450878890456	2333470186369661	1.36122e+10	2.98484e+11
RNF146	1.96899e+16	7998885069760022	2.6074e+16	3.28583e+08	8.66696e+09
PKIB	2510706721735679	9619332053615814	6697630528080369	2.7479	208.383
SERINC1	5116785877304374	7483754381911664	9325483740909700	3342016060218237	6728395165483618
ENSSSCG00000004253	-1.61594e+16	7354443276600782	779009674645163	5253338246216522	4121153279359513
SMAP1	2.38523e+16	7.68674e+16	2.46452e+16	9604061736933176	9903338448282368
SYNCRIP	-8916893504572404	7612648294616387	2.75429e+16	868188116508476	9629593168209296
SLC35A1	-1.6792e+16	7535608373090118	8126020307841486	9772584428471872	9955840348287992
ENSSSCG00000004324	-6440024339581078	706705235355355	1.52666e+16	9016651599723778	9701079895717936
SIM1	2.6767e+16	818058774170209	4.23655e+16	7571.31	3.2809e+07
SEC63	3.71417e+16	7514482749186813	5148568348406581	473043894210362	7851712901901741
SNX3	-8946108436448967	7.9425e+16	3631139975029063	8488738546841885	9573147013314448
GTF3C6	1110553958871974	7865202155741403	5886499572881503	1.52574e+16	919273274043143
RPF2	-3.43457e+16	7306071075658625	4174456330616849	5182143833698556	8102549837450165
CD164	-3.16301e+16	7774260075865465	4647317430779695	4954208497734565	7985286638385198
SLC16A10	-1.72407e+16	7828777104678668	9930705020027958	1.62544e+16	1.5328e+16
HDAC2	1.1623e+16	8966469220384152	1.27369e+16	3585185113365272	402780055945975
RWDD1	36459820711607	8036536605082794	6329421187954742	4262781747653547	7510418955207604
HMGN3	-3651376492259417	918009814133053	1.28876e+16	2.56277e+16	5964505094426851
PHIP	5547834165120353	7996291217955293	2011981576816436	1.56061e+16	4417288963629837
MYO6	4872743502085306	6783617022382105	4421450987666109	9469845407216872	9850145399930568
COX7A2	2412056851576336	996060175403077	7969501466220313	3.72007e+16	7059982927334572
ENSSSCG00000004489	6115543151117252	1.36606e+16	428329478314545	3848867184531848	1.81946e+16
SETBP1	1.29131e+16	7838534645308363	8713897776293527	3.15793e+16	2.7239e+16
ATP5F1A	-1.28871e+16	936105154251154	1.95923e+16	6580319161988482	8851753351459944
TCF4	-1568089012442887	8288024830086234	1.58651e+16	6.80207e+08	9671691981938492
TXNL1	2.20632e+16	725339068281155	1423281358943549	7059774127372473	9054773756742872
OAZ2	2.54293e+16	732853906157262	2.16558e+16	6416754357789141	8812222988995712
ZNF609	-5524677443130005	7401024473289577	1.10433e+16	2933168590638352	6371087086572571
TPM1	-2.571e+16	90619004480989	4471780899436589	22757.8	1.06203e+07
RORA	-8905498787064192	9097212383343252	5465134149701965	1.93996e+16	1.0965e+16
ANXA2	-7680363702634375	6660208978799911	2.21461e+16	2.52664e+09	5.34708e+08
ENSSSCG00000004583	-54888853532	8287714409127977	2.94937e+07	9999566684028904	9999651191641896
MYO1E	5490981550988294	7.37367e+16	1050072199274179	305490459308263	6453101966549638
SLTM	-4799325434711947	7.28578e+16	864828879961993	9259065989594012	9783454605241944
ADAM10	-2.50949e+16	6934259037631486	1.80652e+16	966097591392217	9906960164793324
TCF12	-6034598058909691	8845781714393281	3.19561e+16	7383627426128485	2.82315e+16
MYO5A	-1.21378e+16	819129044044819	1.12869e+16	7369007947767462	9219656965595468
MAPK6	1.11336e+16	6780593145916603	2.10875e+16	1.46459e+16	4.27846e+16
SCG3	-5861380611908836	716269030415402	1110690708386129	2919318531508342	6371087086572571
COPS2	-6623790235368465	7.35737e+16	1.4824e+16	9030940150803716	9701079895717936
EID1	-1.47494e+16	7933249893604694	1047016788411069	1.21318e+16	1.1935e+16
MYEF2	-1.62517e+16	7595558936232042	1.11145e+16	7388439043315066	9219656965595468
C15orf48	1.23582e+16	8075742200887644	8817626784433173	2.98334e+16	2.61043e+16
B2M	-341732909416785	8456421577852712	5696328088740215	44.4026	2606.86
EIF3J	1.62337e+16	7693062554529695	9432612306537956	7587477865320481	9280382872905428
PDIA3	-2.4941e+16	84595468695615	4471920847691597	503671413462166	8049503935321825
UBR1	6070888286767018	7029534606735892	1.14485e+16	2.8463e+16	6302030780926104
RTF1	4861094344560138	7565554572141342	8287033881883707	3.62648e+16	6991725224953832
IVD	-6706474394439215	6419445414503183	2.221e+16	637444709991836	8802347285167994
SRP14	-1.98932e+16	8306499472693657	299461578992523	584220159389363	8480099636293478
MEIS2	-3.12925e+16	7398770266700846	2.15096e+16	3.52055e+09	7.19933e+08
ACTC1	4565063203322042	1032407244277666	1.69205e+16	1.10367e-22	6.69561e-22
SCG5	-1492558121197379	8648987206774526	1.57763e+16	7.12889e+09	1.00578e+16
UBE3A	-3.70786e+16	7467811746180931	5035386672107074	4779493755029313	7865973733149332
NDN	-3519999041199277	7454631581446859	4.32298e+16	5108633040437848	8074743647555587
CYB5A	-1.28783e+16	7939817751774436	872957383595475	3130896675871561	2713443785755353
VPS4B	-639191512340472	7084273165409472	1.37137e+16	2415772543984224	580806608989602
LMAN1	-7322579626277465	7.33538e+16	1.73468e+16	1.87815e+16	4953958102740035
HACD3	-2.27705e+16	7379389505262087	1.95273e+16	6585636013927149	8851753351459944
RPL4	-2.79229e+16	7453058756641263	2833178053742431	5945348096628599	8560548683436748
ENSSSCG00000004963	-1037618335826027	7758248892256409	4749569410529375	8274797030367607	9496422557298466
RPLP1	3523826563326072	1.37107e+16	188273391944157	1700237450472396	4.67437e+16
RPL36AL	4934449852498323	936459972641381	2.81861e+16	9317695629872716	3280117223668925
KLHDC2	236738034056844	7248285003530395	1.80487e+16	6709547315947287	8920287439150334
RTRAF	2.90469e+16	971433610811876	1114111763208741	2911898858163643	6371087086572571
PSMC6	4511156478300595	8541048021568448	1.77376e+16	1.82917e+16	4.87422e+16
PSMA3	1447003665805044	8229773480143752	1.68465e+16	9672604719349874	9906960164793324
AEN	73303156744385	7.02547e+16	1.79963e+16	1.79757e+16	4839614552493678
RPS6	3.7795e+16	1248903526473176	2.01883e+16	1.55359e+16	4411553353544332
PSIP1	-1.57984e+16	8406280058009562	1.51876e+16	6967486428114262	9054773756742872
NFIB	-8562249103979097	731502413354464	4405571503429889	31916.1	1.45218e+06
MPDZ	-2555984411221554	6656670013361781	8422316454074547	3706432773253433	3123012799685763
PTPRD	-4682952350443779	667615775337218	1564953299632319	7.62314e+10	1.05107e+16
RFX3	8844777785857396	9056520111323120	7308430660748943	6.86318e+16	509836519648981
ENSSSCG00000005255	-4.26464e+16	7.13155e+16	641581192721695	4.23139e+16	7491367926399457
VPS13A	-6696901912958683	6962113660840484	1.06637e+16	3.01766e+16	6442726964376668
VCP	4.84575e+16	7500087880164894	7533812192316847	3854078236947698	7194279375635703
TPM2	-5447041520018809	7348224894757392	3.31389e+16	8.5806e+06	2.89198e+09
NANS	-9513266972983656	8622080398800737	7.08725e+16	7763430205382837	5.62926e+16
SMC2	-3.3344e+16	6913458237149205	1769351651103376	2.5951e+11	4143048328484674
NIPSNAP3B	2.43069e+16	7409084117894995	2.23213e+16	6366027815769073	8802347285167994
FSD1L	-4.73835e+16	7058844267035782	766594822317157	3.81273e+16	7146405946729252
RAD23B	-8325973770185344	8038547063665794	3.52041e+16	6061741533068635	2507356725042026
TXN	-1511516729849454	919905139882226	1943732312891892	1.03956e+11	1.87326e+16
PTBP3	-8881798655941461	7161773399012779	2.47417e+16	1.1573e+16	3.74119e+16
ZNF618	-5878398135679478	7057937920586464	1.1885e+16	2756318435395393	6196671033667913
AMBP	5470002391563371	7876764401526784	1534728299216388	2.15404e+16	5452512335561082
ENSSSCG00000005488	1563165827385775	7815662365916258	1.12739e+16	7370465955649823	9219656965595468
NDUFA8	5956554389754161	7520706725001626	1.31494e+16	2515024381466094	5936892833032803
STRBP	-8316205679183056	7281037713993164	2226834439241987	8813754492256426	9652614996484032
PSMB7	4.26758e+16	9004820818374252	1.47727e+16	2.24203e+16	5540221920849566
CDK9	-2332272150689818	6846326202835893	6.27903e+08	9993677535067388	9999651191641896
SPTAN1	-8016664132387845	6750949511175509	9296866834192878	3349443534297031	6729055946937686
ENSSSCG00000005656	-1.907e+16	9142989729374016	3784150912626423	538452675504454	8262933131687236
ZER1	1.22573e+16	6697613841165274	2989612256030584	8627261388448635	9629593168209296
MED27	665390579924212	7103330664487615	1641508056394647	8980529396969889	9701079895717936
BRD3	-7418889547002165	7373250782123534	2.02764e+16	8867677073693022	9652614996484032
ENSSSCG00000005768	-8576951384526562	7506507104010192	2.27203e+16	1.31727e+16	4024157358685722
TXNL4A	2958772545141499	7090379406250867	3293124849292135	5660642025545954	8406069614573988
SNRPA1	-3.65834e+16	7116036759798153	466383114775638	4946558276452762	7985286638385198
MAMDC4	-2202277738338912	849078602587483	4.19343e+16	5172652775565384	8102549837450165
VPS28	-5991819527061096	8312878998939576	2744180491717956	9760910880758776	3.37094e+16
GPAA1	-4.54119e+16	6987598673061119	6021502327255441	4377587889657543	7545380213525085
CHRAC1	-3.13106e+16	7381591722508716	2.17077e+16	6412765456795637	8812222988995712
ENSSSCG00000005959	-3937228255359872	7110126286987631	5708839849017511	4.49908e+16	7646591819996417
MTSS1	-1.45096e+16	8428496204590335	1134948354596556	7546895291922671	7588590846021691
NDUFB9	2.21417e+16	8356354763233027	3.26711e+16	5676023537927809	8406069614573988
MRPL13	1.02328e+16	7180065128369033	3.01803e+16	8620818258383373	9629593168209296
EXT1	-1599172164785278	809394511073498	1311341475336327	293188792381863	3.39675e+16
RAD21	-5718498835299185	7745422719991189	1.31809e+16	2.50936e+16	5931203268072651
EIF3H	2.39463e+16	8783915489315595	5318384479613751	4658349617377653	777816174644709
TRPS1	-8830473680088539	7576662336316636	892135224025461	3.44899e+16	6838287398310549
EIF3E	3.39746e+16	895967580296829	9903860612118684	3196480360670626	6574484153578862
ENSSSCG00000006061	-4722825802008432	8126246047536624	1.34843e+16	9075557680043164	9701079895717936
YWHAZ	2.04016e+16	865184644753918	3214911566793397	5707128895006115	8406069614573988
PABPC1	4316154128764386	9606683370663972	2.34316e+16	1.25834e+16	3.95132e+16
RIDA	4.02623e+16	7112467192155512	5798552689532968	4463690564705675	7645487088438493
RPL30	1.84929e+16	1.01653e+16	4526894774847592	5010605237875128	8040150381085226
LAPTM4B	3760697428618821	8080718292254982	9885181932186528	3201048108810889	6575516431191668
MTDH	-8808561913319558	7624555428651635	3121457838985331	7726762695618533	2886050766227113
MTERF3	-4.29685e+16	7914636830466691	8096300316333838	3.6823e+16	7046523402253063
CDH17	-1.81991e+16	6798775425104905	5820171057310606	1584340406397097	9392506643787348
RUNX1T1	427011493801254	9422728746276562	2.05759e+16	1.51449e+16	4.3818e+16
ENSSSCG00000006156	1.84293e+16	9904639799392272	2.39132e+16	1.00778e+10	2.29269e+11
PKIA	2.46029e+16	698607040531508	2004040805240311	7.58229e+10	1437475663817959
NDUFB8	2.16282e+16	864087215833727	4019169566946599	5261009176000662	8148967404528684
ELOC	-4406106058912944	8102326362286195	130233248096346	2.53788e+16	594457460901942
KCNB2	5157606609071846	7677854463890137	1.0783e+16	2990778805003658	6426466853726869
TRAM1	-2653113851714438	7046748302046529	2.28876e+16	6323584254920261	8802347285167994
ARFGEF1	5721717620052561	7497679781727515	1.10994e+16	2920941901859426	6371087086572571
CHD7	9124166268503484	8161025524449753	4874386467737677	2725812919372052	1425568825648602
RAB2A	2794740590023953	8492664062262762	6710767810987104	4126764438959224	7421651461369355
TOX	2.84415e+16	8900856549898473	7340538028095227	3.91572e+16	7222842583465937
SDCBP	-1.12144e+16	8105161374389306	8302043607418394	7732451847751327	9303305922830334
TCEA1	-8257032948513088	7286860397510826	2.48047e+16	8748547371569179	9641546692247684
MPZL1	8734012829348771	7689924993754116	3.31103e+16	6881616670616475	2.72866e+16
MGST3	-9001107040355436	8126029637309717	476380937186027	2.90642e+16	1.48715e+16
PBX1	-4189944057274634	8971264413872225	8876200843921626	4.45286e-06	6.23401e-05
RGS4	2220184027499959	7979257559772946	2.70395e+16	1.99345e+09	5.42013e+10
PFDN2	3.14707e+16	8377516775591825	6651390639499937	4147515015958921	7423243285553447
DCAF8	2528515005973586	7829997562660555	3.37896e+16	5610459773930504	840494939344497
ENSSSCG00000006395	-9300176222099972	7630826267092635	2.77853e+16	9553553885698688	3324888238422934
CRABP2	-2061730919172601	8923478451676141	2.69391e+16	2.09966e+09	5.61967e+06
NAXE	6292474998238871	7.46609e+16	1.49775e+16	9025961727339676	9701079895717936
CCT3	6587965486030407	8712522787808991	4046979991361924	4425044069558215	2.04647e+16
LMNA	-3098689149036575	703796559271341	3195216858846015	5718952360760466	8406069614573988
LAMTOR2	-6747779956035246	7.30495e+16	1.09511e+16	2953418244785612	6371087086572571
SSR2	5887459378245808	1.03751e+16	3.15598e+16	7564948558055458	285672455316396
KRTCAP2	-5285735374893988	8677175078044494	2322081304844766	1275492619169966	3.95713e+16
FLAD1	-2.96447e+16	7874175471317655	2703763754560786	1.99532e+09	5.42013e+10
UBAP2L	-4.19707e+16	7209142145323456	6121398030775377	4339832721841008	7529547715682208
TPM3	-9584219167696176	8343601852820969	6824968532667033	8989213982956882	6268340785050393
ENSSSCG00000006559	-3795595286971534	6973426623180613	4.08925e+16	5225156717014386	8114151215841453
S100A11	-1.17477e+16	9693774243819984	1.5233e+16	9.50269e+10	1.2624e+16
S100A10	-1.20974e+16	8058947556928102	7074369771013363	7819432004248145	5.64737e+16
CSDE1	767105506139924	9062037010721848	603590944425004	1401772733458635	8648224999643105
CAPZA1	4074791033094643	8190250544228764	1.29438e+16	2.55242e+16	5955638948250042
RAP1A	-9828319395862356	7151975743704621	3131223670853301	7680606955062247	2.87628e+16
GSTM3	-3956023519117802	7276678639213926	5707210849792389	4499725186382507	7646591819996417
GNAI3	-7714285399784248	7464316343274368	2201648893126211	1.37863e+16	4126791059988252
PSMA5	3.86215e+16	7339251221590043	5014274909096258	4788735657323878	7865973733149332
SORT1	-1678292267608189	6.8367e+16	6327264651373454	9799320844288380	9957992147741404
ELAPOR1	5560116651515463	7031610521279763	109303163306383	2.958e+16	6371087086572571
DPYD	4773937788567034	7.18838e+16	504027543762537	4.77736e+16	7865973733149332
PTBP2	1.37491e+16	852417738360917	1.28646e+16	7198396733643986	9142415949219856
CNN3	-1.38309e+16	873598403181608	1.83986e+16	6679699197643323	8897067064318978
MTF2	2.02013e+16	8249388956140217	2.99665e+16	5840927846396078	8480099636293478
RPL5	1.63242e+16	7961572690876033	1631709459962234	6862537258982127	9024434834788636
EEF1D	-3.48379e+16	9099869739853814	9414140722781186	3.31914e+16	6723372818902229
CNOT7	9644995806782616	806444963481936	6411045967419403	1.13413e+16	7398240517882762
VPS37A	1.48747e+16	7.38149e+16	5707665587889507	1.6891e+16	980327316919577
SLC7A2	-5313255599425587	8986052125232233	2.1527e+16	1.4232e+16	418451589890808
PCM1	-2858184930500668	7392878248095734	2769758373513529	5986902456003348	857927801064999
VDAC3	-5716785820509825	7415924039809981	6740671216304062	9345659281000972	980748709190863
POLB	7167708433239406	7.03909e+16	186239523079107	1723486106526188	4.71228e+16
PCSK2	-9276236292467620	7744728914133836	6628826803531268	3.8957	28.3607
DSTN	4730955564542805	9084509600306084	1.51382e+16	2.18557e+16	5484094606014679
ENSSSCG00000007088	-252085850502239	7619155063114695	2.0028e+16	6544946409096557	8851753351459944
ENSSSCG00000007098	-1.06582e+16	7081325083787452	3.54476e+16	5973390766815203	2.485e+16
MRPS26	-3452074552855465	7669407603989192	3.86039e+16	5343886706576808	8235286880584073
ENSSSCG00000007188	2.46117e+16	8001031771873665	4102768069278959	5218290425337828	8114151215841453
ENSSSCG00000007203	-1.71258e+16	7405424135552473	1.09212e+16	7410429587351065	9219656965595468
NOL4L	-3681111534871027	7.66218e+16	6052948256069413	4.36565e+16	7545380213525085
CHMP4B	1.99135e+16	768315971537964	1494521615553528	6990594429524232	9054773756742872
RALY	5237074668754877	8192424652937966	2.19913e+16	1.38089e+16	4126791059988252
ROMO1	-1765433684051896	8109262298820184	2.15466e+16	9629768467858316	9906960164793324
RBM39	1.35046e+16	9199293418490552	2004613862764031	6543486857957123	8851753351459944
SCAND1	6686757713978255	9370579839406494	5212783179523748	2.24214e+16	1.22913e+16
DLGAP4	1704271661847044	6883802807400048	7099904221500175	7708807106787653	5.62926e+16
ENSSSCG00000007322	-5042933452419517	7004604694871852	7952396091231213	3.7252e+16	7062367247946467
ENSSSCG00000007336	7339379874761129	7.34014e+16	1.84535e+16	1.74325e+16	4749571834659927
TOP1	5388755764070577	8201663398821058	2.31276e+16	1.28316e+16	3970240797706976
SRSF6	6795220076375883	8272535083161042	3813818781869639	508314344303061	2.23462e+16
YWHAB	-1.85748e+16	9045291165650764	3.50868e+16	5536222558097581	8363413392917896
UBE2C	-2.88389e+16	7.47491e+16	1.98391e+16	8.42428e+09	1564508464940956
PTPN1	-1.68299e+16	6780927262420695	430870428676462	8355614615974452	9512163385852208
RIPOR3	-1.50929e+16	7117951777198402	8137257634579265	7754458837875614	9303305922830334
ADNP	-1.39767e+16	7108544515847879	6260522728604979	1.23458e+16	7912129272140048
PFDN4	5043665687717912	795397545820148	1.65518e+16	1.98256e+16	513265236049865
GNAS	-1437071340496854	7414502855554948	6215481076425353	1266379352442801	8059659148055544
CTSZ	-2428893379949863	7516462572276261	1.32125e+16	2.78085e+16	3265254396362357
ENSSSCG00000007524	-1359027985137729	1.11121e+16	3053594275226512	5805418860523047	8471086859234765
FSCN1	1.07498e+16	7313578341469637	2645118505217668	1.03868e+16	3.50725e+16
KPNA7	3.5775e+16	7624582459263488	3836148605886822	5356749452966011	8248125215226852
ENSSSCG00000007609	-2.18934e+16	852762243817471	2798448283916235	5968029397188767	8561947307963397
BUD31	-4.32922e+16	741353177898707	6797802411262417	4.09662e+16	7396682358723088
LAMTOR4	-1.39523e+16	7985789851265086	1.19499e+16	7295789164270259	920613548651522
GNB2	3.23736e+16	9259282075501266	1061636084315551	3028423285081173	6442726964376668
POP7	6696482974742968	7869705005962569	2.18457e+16	8824983068762595	9652614996484032
CUX1	-4.26983e+16	7546223607043117	7006669691569412	4025596736716545	7356112110652114
ENSSSCG00000007688	7199140090277201	7840194623962874	2.27901e+16	1.31136e+16	4024157358685722
ENSSSCG00000007692	524357527145291	7.77073e+16	1.24681e+16	2641629154858195	6070410431618579
BUD23	-2713044520521762	7424874409605872	2.68338e+16	6044486368458318	8614694745962521
GTF2I	-2290745850025134	7786965225308893	2540297629333972	6142517824403232	8693865598960063
AUTS2	-1830771985197115	8588512774834928	2.45902e+16	7.09115e+08	1.67609e+11
ENSSSCG00000007743	-3.1176e+16	9417893018690372	1.11746e+16	9158124536832512	9747243659084896
BCL7C	9524257161257400	7785105808230356	4103255142293925	4.28007e+16	1992259240829204
DCTPP1	-2.93964e+16	7076404217897534	2880599837871014	591466428739824	8538580062449942
RBBP6	-9054613679822392	7115394283455214	2620782082849552	1054724448954749	3.54169e+16
UQCRC2	-1.09703e+16	7476559865544151	4384645474211357	9832938811335208	9972778060913884
ZC3H7A	-3.36107e+16	6596546542613941	1.46077e+16	7023131247895823	9054773756742872
RBFOX1	7101182507786837	7000173320449788	1.63478e+16	2.01043e+16	5190054992734449
ROGDI	8842504805143644	6788234638743465	1.69678e+16	1.9271e+16	5032021830216143
PAM16	8289531036673108	7472393170339365	2593145876584041	1.07327e+16	3588222054648872
SNRNP25	-6376487697083111	8266028703004997	2468450099884567	8751557766809437	9641546692247684
HBZ	-1.83101e+16	1.05898e+16	3.68626e+16	5437541259461666	828736816534559
ENSSSCG00000007978	-2460290312309467	9833174710535614	6205452969929279	4308447223754284	7522044675291581
LUC7L	5662342309878053	735827193004393	1.01993e+16	3125366188003615	6508199613462905
ANTKMT	1.88297e+16	7446528584089172	1.36049e+16	7122406736528705	909800708255691
RNPS1	-3667349564517031	8384065900948162	9267328224874398	3.35713e+16	6729055946937686
ELOB	1.55655e+16	9659408501969744	2.22156e+16	6374017994787772	8802347285167994
CHCHD5	4.88765e+16	6.9786e+16	7400064820180949	3896588017011719	7206612226363192
ENSSSCG00000008137	-723751165353061	7102104065382222	1.67835e+16	1.95144e+16	5073746884602574
MAP4K4	4.77479e+16	7.64054e+16	663335259297448	4.15385e+16	7423243285553447
TBC1D8	1.64603e+16	6770977225190382	510896298648825	2.38025e+16	1289611620266697
RPL31	1.19795e+16	1.1248e+16	2.39467e+16	6245913510860805	8758037561411494
EIF5B	8149081600937418	8291285404692365	4915808756349779	2.6612e+16	1.39579e+16
ENSSSCG00000008183	1.10258e+16	731569984853867	3589342556024788	8497357484553844	9573147013314448
MGAT4A	-2.76559e+16	7786799543162785	311776086881532	5765923470771828	844925983639672
COX5B	-1.45891e+16	9289584695151276	2.38774e+16	6250929006743698	8758037561411494
ENSSSCG00000008222	-1407941838263947	7226246189501871	62157072137492	803118520829951	9351731976394824
RNF181	6050508969448753	7335239498782978	1.09318e+16	2957674364280819	6371087086572571
TMSB10	4.18398e+16	1.29632e+16	3.00656e+16	8292828453158015	3.03681e+16
SUCLG1	1.06777e+16	8332188598340478	690960063590218	7926575688310785	9324771086614342
CCDC142	1.51203e+16	8033463714289905	1.56312e+16	6925744728644954	9054773756742872
CCT7	9098295832598264	801739210167307	4990271405334344	2.54902e+16	1.35638e+16
ACTR2	2.44475e+16	7185106156865162	2.0595e+16	6499603966068935	8851753351459944
RAB1A	7886220409411671	8359514752108941	4083452887439973	4330507896839891	2010592952104235
COMMD1	-2885442284814655	766846721422046	2854649677654848	5931414511530873	8547248148049239
CCT4	2.05814e+16	8382646572487022	3.23451e+16	5695410585591213	8406069614573988
USP34	-1108405776470854	6880864254739984	2819354677330773	9313384049023142	3280117223668925
PPP4R3B	3675678317977386	7175179392916951	5029625239050519	4782012991785197	7865973733149332
CFAP36	3.6014e+16	6929416918282099	3367063136641053	5617365981127822	8406069614573988
CCDC88A	1.22669e+16	7920326323186429	9089147212879918	7630468779552491	92834107083078
EPCAM	-1.93559e+16	8641854726274252	1787195247377138	672475977810606	8920287439150334
STPG4	-2507293447865121	1.03911e+16	8576314360129882	3.54402e+16	6929374768037079
SOCS5	4.66175e+16	7628517539879193	8528138662553029	3557575255617872	6934644212895741
PRKCE	-965508561271905	6964582869750566	2.83515e+16	8662851818760443	9629593168209296
LRPPRC	-820931781431339	6655035396406164	7.35896e+10	9931554814156896	9999651191641896
COX7A2L	1.2047e+16	9426807828387424	1.1919e+16	729915027859421	920613548651522
EML4	-1.13523e+16	767667506656524	475957894170999	2913567469538438	1.48715e+16
SOS1	8218356841652904	7358574878010563	1374282992753125	2.41077e+16	5803714395822903
SRSF7	-2.02118e+16	8951772867134261	3450377873709489	5569356497300142	8377048615773768
LTBP1	-5035431276647758	7112560432803549	3521633779145188	2.95038e+07	1.09251e+09
DPY30	2.9945e+16	802190909729736	5220636356258361	4699627188881462	7818392581137351
PPP1CB	2.1647e+16	8037292841940102	3048229756245733	5808745274903839	8471086859234765
HADHA	3.47318e+16	7.25033e+16	4655968982015889	4950198060090744	7985286638385198
RAB10	-3468093014832859	7067924861112639	4.09584e+16	5221809268910522	8114151215841453
SF3B6	-3.04583e+16	811179155500187	4.41962e+16	5061768980693351	8049503935321825
PUM2	-479072524697413	7852289529895131	1.02849e+16	3.10513e+16	6481994468207606
LAPTM4A	-8132279617987581	8723633532650107	5510379766955964	8144090018209571	9404977051485672
PDIA6	-2895314293671584	876046798816191	725606918042498	3943108742333587	7247411229145228
YWHAQ	6887022778233386	9736182204916874	5.66129e+16	8119317095447961	940006993210033
KIDINS220	9351708728821200	7106863505535407	3259231007931218	856733832334135	9611407762638976
ID2	7352774361694969	8753367515078054	2420285260544359	1.19773e+16	3.82433e+16
ENSSSCG00000008659	2.42805e+16	8837227499260782	5293625535933844	4.66875e+16	7788381859644761
ENSSSCG00000008686	-1969665718712615	8111913476465139	2618544935803121	6088489460495462	8663839576310979
LRPAP1	-3716773023805803	788202999788746	6079060716670526	9378532440855356	9821017860964756
ENSSSCG00000008748	-2.52338e+16	8015135929561097	4.16693e+16	5185918149962115	8102549837450165
DHX15	1.54524e+16	7003347484274816	7354589386846841	7862422411470423	9324771086614342
PCDH7	-8600653120770422	7231040237697644	4892481383738931	2659.65	127383
KIT	1.95698e+16	6558647040518058	5336620832597132	2.08819e+16	1.16939e+16
CPE	-4273239701556345	841409756184235	5801850364966713	259.664	15752.9
MSMO1	-3.35525e+16	7077681776070051	3715090232843936	5421828680297838	828736816534559
ENSSSCG00000008898	-2919892811032299	71322064621697	1.52595e+16	9.37044e+10	125398543991039
CLOCK	2642490860323764	6812996429644117	1.53957e+16	9687011843283188	9915838894699328
AFP	-6628880805760896	8629195346569935	1792506963948366	1.80621e+16	4.84139e+16
RCHY1	-3.94511e+16	673686283248861	2.16808e+16	6414828963184666	8812222988995712
SCARB2	5299699494334329	6915498379032543	6462824849544035	4.21445e+16	7475923748514078
SEPTIN11	-1.68939e+16	7373049252857679	7.44301e+16	6368317118419576	48904376183644
CCNI	3.77221e+16	9187896458941356	1526541139017917	2.16632e+16	5458270103538108
RPS3A	181370515883385	1.26621e+16	4.10092e+16	5219226909852844	8114151215841453
ZNF827	-1526369182259481	6998517463236561	6145642089440971	1.31736e+16	8221289802217256
ABCE1	-655805340339838	6891020356686871	8974212919321989	924527443806687	9782790393768434
SMARCA5	1.79127e+16	7303172308379155	1.1071e+16	7393375087665501	9219656965595468
MAML3	9195906554987876	8440934593584101	5698023814097167	1698402527297309	980327316919577
MGARP	-5020154854910701	7868208317067627	1.02827e+16	3105658888064304	6481994468207606
ENSSSCG00000009072	-3.54062e+16	7123550126004341	4159663617497882	5189566444614963	8102549837450165
ANXA5	-3391531263705725	7159570467419647	3620794601231212	5473536186577951	8322335722282265
CASP6	4605051767743127	8226864929450079	1.55259e+16	2.12754e+16	5430744331862644
OSTC	-4.66094e+16	8649617292661892	1.74932e+16	1859618088437146	4.93368e+16
ENSSSCG00000009146	2.22169e+16	1267246801666991	8134261986379849	3671092289579768	7033039965300187
HADH	-1.08335e+16	7614337958514623	3742280525583294	5305199079290448	2.29914e+16
CISD2	-3.60062e+16	7305632435915392	3.59213e+16	5489435997392131	8332588419727839
PPP3CA	-5909919861125157	7.88114e+16	1.75207e+16	1.85616e+16	4.9317e+16
H2AFZ	-1240113419748069	1.01787e+16	1.89654e+16	1.3311e+11	2.35203e+16
ADH5	-4444462055494672	7667990251596659	8454186869995883	9267404252437974	9783454605241944
ENSSSCG00000009211	-8961399872568768	7014127672125934	2329544248258619	1.26939e+16	3.95713e+16
SEC31A	-6714617599592979	7.23021e+16	1.41096e+16	2348967819390872	5692571812638332
HNRNPD	-8683122310990117	8404245766193721	5699447618496041	1697025297490519	980327316919577
XPO4	-1.47088e+16	7733388222645545	9118255054652224	7626791363334	92834107083078
RPL21	6236347278989485	1155407930339267	5.91283e+16	8078790214151363	9369028483069132
POLR1D	-6163477080344373	8683081061627346	3325370215705523	6821865404278114	2.72866e+16
ENSSSCG00000009327	-5594072991350484	1.05128e+16	4668888722727656	3.07138e+16	1.54845e+16
ENSSSCG00000009341	6353520891322684	6595816657857867	5346920435367775	9417085260138044	9829626893993038
SUPT20H	-2.12617e+16	7125755231793129	142672848571058	7056381660330995	9054773756742872
ITM2B	-3.11382e+16	8256756656321105	5579381790535769	4550921764143887	7665143485991969
ESD	3523808078900483	8752318562933407	8763570697727996	3.49201e+16	6863353526109605
ZC3H13	-5470914772522799	7120522346799101	1.05181e+16	3.0509e+16	6453101966549638
TSC22D1	-4.73276e+16	7648524914612841	8920580282229765	3449202105301694	6838287398310549
DACH1	1.67676e+16	9349139411413752	287849981021874	5916016186126031	8538580062449942
RBM26	-6732112329988758	7554086633569415	1.77931e+16	8938843905391991	9688107136203582
NDFIP2	4829788705468995	6938445790148149	6157833755076705	4.32619e+16	7525803470257386
ARGLU1	-7430306307691186	8307644407437598	3.71107e+16	5405271823538084	2.33118e+16
LAMP1	-3.68579e+16	7692107424462711	5712163802809307	4.49776e+16	7646591819996417
PSPC1	-2702632782049243	815573132712577	5358830464819893	4.64144e+16	7764172718464544
MPHOSPH8	-6605987291916787	7036503246505635	1.35e+16	2.45279e+16	5850686852460998
PPP2R2A	-5920368403895042	7223984287646513	1.11035e+16	2.92006e+16	6371087086572571
BNIP3L	1.10278e+16	7508719397944322	4608261262115021	830025696695797	9497452867174824
PBK	-7907735213848817	7971991247246434	2652611741438137	1.0338e+16	3.50197e+16
FZD3	1.02658e+16	7426045359906957	3985778338761614	4.58859e+16	2098585973844786
[truncated: 1,283 more rows]

## Sheet: Sheet6
Sheet6: Differentially expressed TFs of the 1°PEC comparing to the rest of progenitors
[truncated: 74 more rows]

[truncated: 2 more sheets: Sheet7, Sheet8]
