# Supplementary material for: A multimodal cross-species comparison of pancreas development
Source: Research Square preprint supplement (doi:10.21203/rs.3.rs-4151759/v1), 2024-04-03
Supplement: Supplementary file 3 [file 318afa9b5aa3959daa8ccabc.xlsx]

## Sheet: Sheet1
Supplementary Table 10 Improved genome annotation for Sus scrofa
showing UMI counts for 37 genes of interest before and after gene extension
Gene symbol	Ensembl 101	Ensembl 101 + iso-seq	Gene extensions
ADRA2A	17	18	13738
ALDH1A1	73689	72881	15
ARX	28753	28726	1881
CCK	10928	10924	2441
CCKAR	74958	74912	467
FEV	84	72	39490
FOSB	84043	83987	30362
FOXP2	15240	30404	8847
FZD8	27	27	8466
GHRL	67	67	26
GP2	87	75	161
GUCY1A2	325	326	356
IAPP	31	31	336
IGFBP7	31370	31308	4836
JUNB	978	152292	3112
KCNJ11	27413	27345	19848
KRAS	74999	83349	742
KRT18	438939	438228	478
KRT8	910911	927926	144
LMO2	6210	6191	152
MAFA	2	2	1517
MNX1	119	76	31386
NKX6-2	66	66	70
ONECUT2	7774	29552	6030
PARVB	8471	8662	48
PCSK9	23406	24495	2084
PPP1R14C	1865	1743	280
PTF1A	785	549	27133
SHH	4	4	769
SLC2A4	228	229	631
STMN2	20077	20057	109
STX1A	6122	6833	394
TEAD3	10276	10260	3617
TMEM190	69	69	56
TXNIP	459739	656317	851
WNT9A	1436	1435	2
ZNF385B	2091	3587	1052
