# Supplementary material for: A multimodal cross-species comparison of pancreas development
Source: Research Square preprint supplement (doi:10.21203/rs.3.rs-4151759/v1), 2024-04-03
Supplement: Supplementary file 4 [file 5838cbcc2572ca02da6e2f25.xlsx]

## Sheet: Sheet content
Supplementary Table 6: Differentially expressed genes and enriched pathways of the pig and human beta subclusters
Sheet1: DEGs of pig Beta,0 vs Beta,1
Sheet2: Enriched pathways of pig Beta,0 vs Beta,1
Sheet3: DEGs of pig MEIS2-positive vs MEIS2-negative cells
Sheet4: Enriched pathways of pig MEIS2-positive vs MEIS2-negative cells
Sheet5: DEGs of human MEIS2-positive vs MEIS2-negative cells
Sheet6: Enriched pathways of human MEIS2-positive vs MEIS2-negative cells

## Sheet: Sheet1
Sheet1: DEGs of pig Beta,0 vs Beta,1
Gene_name	logFC	logCPM	LR	PValue	padj
GTSE1	2.49926e+16	-5455494645659699	5596414819939645	1.79973e+16	4322504903508047
TTC38	-1138489906896552	3401933605648057	3.10605e+16	2.50104e+08	2.1182e+09
CDPF1	-1.23304e+16	5527356479679242	1.7003e+16	1.92248e+16	3037584918203746
PPARA	-4899900401560855	3.90366e+16	995485511533796	1.60426e+16	5321281427253568
TRMU	-2.58966e+16	3.5951e+16	3820191819705121	8450382425031415	8981664928155111
FBLN1	1.26906e+16	2122180304473694	2150981872845517	3.52022e+09	2.09354e+11
KIAA0930	1.42855e+16	5640538243434998	2345909957972087	5.94518e-38	4.7219e-37
NUP50	2528904447638476	6118888949538015	6769908165379299	9270760519185084	2448384271347762
PHF21B	-1.63702e+16	1.08005e+16	1263635256671414	3783173902022509	1.4829e+16
ENSSSCG00000000021	-1.05644e+16	2315482781961826	1.68417e+16	4.06305e+11	1.98601e+16
RTL6	-1.00841e+16	5196713097957308	1.13911e+16	9150039434751444	9454852033169496
PARVB	2.26185e+16	5229436940880926	2.55518e+16	4.30669e+09	2.99902e+10
SULT4A1	4658430653358566	2.93474e+16	8477462483487846	3.59573e+16	1.08136e+16
ENSSSCG00000000028	-3679711392312589	2.7226e+16	3.67869e+16	8478996671500788	9000154439447933
SCUBE1	3.09895e+16	1.06699e+16	7630581047066478	3.82373e+16	5147790885635268
MCAT	8705023679586145	4375917662362834	5.38197e+16	9415181393756756	9626306657257976
TSPO	-3.41406e+16	3573753963546881	1697547967624429	8.36992e-24	4.52212e-22
TTLL12	-4406618657172804	4443031841118852	1.3984e+16	1.84376e+16	7846216067162261
TTLL1	3141739174641054	5.23644e+16	4313349969756002	3781442672968928	8113313529878884
PACSIN2	-1.18208e+16	3.91742e+16	6577424588154665	0.505647	9.01223
ARFGAP3	-1.35676e+16	5735052215914813	1633047013733985	2.01282e+16	3.14473e+16
CYB5R3	-5718026724548801	6510427596527973	1347300753486988	2.45751e+16	3.67634e+16
POLDIP3	-2612623866477795	4931530899894308	6.13728e+16	1.32361e+16	3320096849774402
SEPTIN3	-7294428980642498	2.15356e+16	8320524485273356	3919959982216876	1.16564e+16
NDUFA6	6282098460344373	7.9108e+16	8930013646766197	3.39236e-06	8.68756e-05
CYP2D25	-9603304159898922	2513607144384714	1808315929313737	2.11464e+11	1.09348e+16
NAGA	-1.30309e+16	5604590007367855	1.41037e+16	2.34995e+16	3.54902e+16
SNU13	1.10748e+16	7957012631836227	1.77153e+16	1.83192e+16	2.92453e+16
XRCC6	-5548278743656216	5375443834002552	3.14709e+16	2.02447e+07	1.73332e+09
PMM1	3432191405178631	5892228251755045	1.09363e+16	9429697766345952	3.33239e+16
CSDC2	4512139188316421	3885850470266942	1.38047e+16	2028292546832991	8530410455018692
POLR3H	-4.43967e+16	3994591396239805	8753523977682597	3.09004e+16	9474631319029196
ACO2	1.27966e+16	6.25224e+16	2238992809770263	1345686087555237	2281642864634974
L3MBTL2	1.6437e+16	4.25155e+16	2213883740719665	1.36774e+16	2.31062e+16
CHADL	1.1063e+16	3543637226656376	4.45194e+16	5046260039801456	6303710356307755
EP300	-3.72696e+16	4988567249921012	1.31446e+16	2883543276465226	1.17074e+16
ST13	-1731128650670044	8843726510305345	617175707615889	8038015594953628	8689935790543766
SLC25A17	-2891442066666706	5630210945894378	1.05827e+16	1.14148e+16	3947315311429689
MRTFA	-5227567528691833	417069840130523	1.6694e+16	4.39192e+11	2.12685e+16
SGSM3	-1.90847e+16	4850924983488569	3.69485e+16	5458076225826512	1.10217e+16
ADSL	2886031773412111	4699366798668974	8868552791928416	2.90125e+16	8970766527062279
TNRC6B	-4197870543873821	7319365812820101	3.14749e+16	2.0204e+08	1.73156e+09
FAM83F	-1.71669e+16	3.86958e+16	1.47793e+16	2.24099e+16	3.42316e+16
ATF4	-3.70518e+16	7073119409592029	1568642692080836	7.47587e+09	3456187485392425
TAB1	-4697678886872807	4838361163367678	1696718376536291	3.80315e+11	1870642875473965
APOBEC3B	-853777393613647	4148580411141429	39626142883868	307539	3.33789e+06
NPTXR	694521389554852	2.62132e+16	6761038896894435	9316950240436160	2.45795e+16
DNAL4	-1.37986e+16	5183790827757344	1.83135e+16	1.75969e+16	2833084740598266
SUN2	-1.18751e+16	4.39485e+16	7466970019461907	0.0556436	1.14033
GTPBP1	-3053007945989497	3.93844e+16	5.26048e+16	2.1815e+16	5.09322e+16
ENSSSCG00000000097	-1.50947e+16	7049188273061218	4702827646501451	8283174208389633	8857209795358936
DDX17	-3885532111947044	8417938663942849	2.30939e+16	1.54276e+10	9.7612e+09
KDELR3	-2605597735028828	8836708058214404	9221066298303684	2392461679172045	7577007908954464
KCNJ4	4585309757761455	-1.59001e+16	2.76608e+16	598933127481621	7118552135815279
ENSSSCG00000000107	-5087086263796167	4.3892e+16	1.60229e+16	6.25806e+10	2931712525112542
TMEM184B	6787579284474266	3.11566e+16	1.59066e+16	6.65475e+09	3102368550843331
PLA2G6	-4603672789653711	3.46271e+16	6364718360697493	1.16412e+16	2977227219952395
BAIAP2L2	4427552135105465	3.58693e+16	9518410745666144	203420671544585	6574077018696648
SLC16A8	3.78682e+16	1124989567792923	1270904816287251	259597005603221	3836524088125119
PICK1	-2.43603e+16	4507650790659219	5.28677e+16	2.1488e+16	5.02591e+16
POLR2F	-5.44093e+16	7817709489299233	6424056842534256	4228410042977528	5546521064793032
C22orf23	3688684463503013	2104489813857851	2.48452e+16	8747532888912528	9180408439650412
MICALL1	-6029600874455536	2002876044270589	4572054607078522	3249756708596604	7142254128113042
EIF3L	-2927048519447054	7591375324484029	1591424933990071	6899472321837524	7844343655047809
ANKRD54	-6504346789077522	506179494020313	3.13594e+16	2.14423e+08	1.8304e+09
GALR3	-3747561643307924	-9106736918171112	2.54606e+16	1.1057e+16	1.95193e+16
TST	-2.09288e+16	4.64515e+16	1.50831e+16	1.14083e-18	5.38691e-17
KCTD17	5962207208291685	4127983349486332	2.51965e+16	5.17751e+08	3.55799e+10
NCF4	-5022392288545768	1.5073e+16	2.62037e+16	1.055e+16	1879472959535844
IFT27	-5.71763e+16	6108381509614762	4209702581417858	5164533009765077	6405031763927546
EIF3D	-1.80787e+16	664006478638401	4842571306183107	2.77655e+16	6258186228727745
FOXRED2	-5591491068702862	2860527692222246	770200023183461	5515966568357032	1.57033e+16
ENSSSCG00000000144	-2819162904035962	2.24633e+16	1.43752e+16	2.30541e+16	3.49911e+16
ENSSSCG00000000145	-401327185854222	3639529263419716	477344771311304	2.89019e+16	6464799040563746
MYH11	-1305490168675243	8669676126097045	4957539015341749	2597715176827399	5.91201e+16
RBFOX2	-1.20334e+16	595267717179856	1.58606e+16	2.07889e+16	3.22442e+16
FBXO7	-1534823902781354	4480362110981527	1511198738045116	2.18956e+16	3366078987332827
RTCB	-1709598512883857	5380901135522851	3030721944964654	8617949772787187	9089985577355396
PRDM4	-5778546337145178	4441956705086523	2.37037e+16	1.12367e+09	7.27239e+10
PWP1	1535540852974831	567008132437321	3.16554e+16	8587861429841589	9068238680512178
BTBD11	6229237466549263	6167483141115577	1.15616e+16	2822626595223234	4089783049068721
CRY1	-4.75425e+16	3.50102e+16	1.00157e+16	1.55214e+16	5172287400427212
RIC8B	-6616660924587445	4237838217969533	2.52485e+16	5.03999e+08	3.47457e+10
POLR3B	-458637473939854	2836127193968443	5614080839131523	1.78167e+16	4286908157226779
CKAP4	-7117106678593443	4.06238e+16	2469345159500675	6.72122e+08	4.52854e+09
ADCY6	-6616709275361112	3.96427e+16	2510577045150906	5.42702e+08	3.71464e+10
DDX23	-4.74788e+16	4.78856e+16	1.1886e+16	5655780205464147	2108986842085127
CCDC65	4.37584e+16	3509606430777618	1044718874574905	1.22836e+16	4206403768192851
PRKAG1	-3.4383e+16	3.1828e+16	2.9369e+16	8657656928047308	1.60429e+16
LMBR1L	-2.63623e+16	3.33381e+16	2.72464e+16	9881053585663068	1.78362e+16
TUBA1B	2.24933e+16	9705367296878692	3424721793812976	6422706395201734	1.25991e+16
ENSSSCG00000000194	-3907456074398822	1.71492e+16	1968635139166806	1605928087895795	26317553099633
PRPH	-3.28742e+16	3.14787e+16	8070022031331035	0.000262693	0.00591832
C1QL4	-1.76851e+16	-7240652988645696	2.06497e+16	8857373562198977	9259442460326122
DNAJC22	-763496440547899	4455701203314106	3.09149e+16	2.69587e+07	2.27427e+08
SPATS2	-6075036195833838	3866470500043261	1692629847120785	3.88595e+10	1.90776e+16
MCRS1	-4839213763282254	4342831780545485	1.30086e+16	3100655292104689	1.24452e+16
KCNH3	3.03609e+16	1.52905e+16	9277924535819436	9232648518293	9505089135223692
PRPF40B	-1.70823e+16	4127792551113399	157515671356283	2094597114508306	3242063876834365
FAM186B	-1.25865e+16	7977859731896342	6.83522e+16	893775290296597	2370530681414865
FAIM2	3.47697e+16	3.36711e+16	529256941838862	2141659897803646	5.01243e+16
ENSSSCG00000000207	1788044515950884	1.52027e+16	1138850609924198	7357636732454106	8187027508802797
NCKAP5L	-433335834790581	2351822396307146	4.10149e+16	4284549682008442	8999904176650274
AQP5	-9854051612605164	-5708880499927942	2963672756494078	5861688266418341	7012299387222886
GPD1	6970078262138752	8465558819853083	7913047366639665	0.000581406	0.127488
SMARCD1	-1.38722e+16	464410974202828	1147274138107771	2.8412e+16	4.11105e+16
ASIC1	592172393774529	448707429909469	367810106870664	1.32171e+07	1.33059e+08
RACGAP1	-1.4181e+16	3.14497e+16	3845770958428278	559531	5.90902e+06
POU6F1	-2.17713e+16	1.32268e+16	3545482861174314	5515496792589758	6723344982112601
BIN2	-6205768228563212	1748621274117547	4071105219229688	4362272325962925	914533068215193
SCN8A	-1.01556e+16	2379424219594266	2468159314631322	6193260554735164	7282584816869793
ACVRL1	-274800160923249	931617435877156	3030551426915622	5819734297508871	6978667246497298
ACVR1B	-5270637519909132	3.94384e+16	1176368206714464	6039763129842814	2.2362e+16
TAMALIN	-6559938087578994	4132508132524969	2463365551157387	6.93303e+08	4.66214e+10
KRT84	3.93245e+16	3590862142766142	8811655863361163	3.47883e+16	4797373328910323
KRT8	-317155509011299	9145980721334212	1.20431e+16	5198498465149421	1.95967e+16
KRT18	-2544360014040906	8319063516577584	9862402183396576	1.68691e+16	5567568464534196
ITGB7	-8362177378256438	-2.81852e+16	5897512392310187	4.42515e+16	5736082052821345
CSAD	-6779255300540406	2933846293296456	1614904086011082	6877880245814532	7827023178383192
SOAT2	-1.30211e+16	1.58591e+16	3093789936599566	7859156264544964	1.48311e+16
SPRYD3	-1.33326e+16	4484263570517212	1277718631927276	2.58324e+16	3.82229e+16
TNS2	-1.48202e+16	2422829345926622	2.23384e+16	2.2859e+09	1.40554e+09
MFSD5	-4446056170283384	4162956946524597	1.38634e+16	1.96585e+16	8298188660040057
MYG1	2.72857e+16	4133691202639869	5.1431e+16	2.33389e+16	5397823317843297
AAAS	-2.07504e+16	3.6582e+16	2488364581425701	1146908464728223	2.01006e+16
SP1	-6775960938588971	1.8092e+16	4551847430778792	3288324807627369	721413926418759
PRR13	6329103078134549	6352341649437126	5886371711081484	4429466005832672	5739988466956849
PCBP2	-3444545330804012	8079454573377934	2.03733e+16	6517242060429521	7544644472830655
MAP3K12	-3774546105629632	3391502485805647	3.45125e+16	6320394883970389	1.24342e+16
TARBP2	-5321721292944055	4833934994532524	2.49029e+16	6.02929e+08	4.10044e+09
ENSSSCG00000000278	-7797379952387313	4972461947560672	4179419828085507	1.01404e+06	1.15741e+07
HNRNPA1	2.39536e+16	8400080408461651	1.04178e+16	1.24805e+16	4264488740016571
NFE2	1.1527e+16	5971183860717253	1.40316e+16	2.36195e+16	3.5637e+16
COPZ1	-3.0402e+16	6.56321e+16	1367693094360701	2171051389457614	9064455110780518
ZNF385A	-1.31468e+16	1358161092613004	1.26359e+16	3784152850884378	1482943937812466
ITGA5	-6897672620892844	1.96745e+16	5784267385288527	1.61702e+16	3948066517516661
PDE1B	-1.59921e+16	1.09402e+16	2329792958182253	9615027137973686	9754252323443198
PPP1R1A	1.45414e+16	8293395696643355	2.27281e+16	2.33469e-35	1.75714e-33
TESPA1	9708228934449788	6973075313083938	4785746279742385	2.86962e+16	6428115251027085
ENSSSCG00000000332	-1.81553e+16	-3539105353509541	3.96384e+16	4648765076310922	9648538787357748
BLOC1S1	-3120704393271786	7684659099640338	1.75511e+16	6752594261716185	7731926793826631
CD63	3.05796e+16	946738533738053	1.81875e+16	2.00188e+11	1.04041e+16
RDH5	-4606592837845548	2.34128e+16	4480125938253806	3.42912e+16	7471665366759524
GDF11	-1726133441418526	2598474662136713	3.9987e+16	2.55657e+06	2.80652e+07
SARNP	-3.54752e+16	3680814869899816	6401573913823141	1.14019e+16	2.92385e+16
ORMDL2	-2.22401e+16	6598108561382625	614699439470008	1.31636e+16	3304311152707516
DNAJC14	-2800725016220216	5231479837295121	6141773504312763	1320248334371787	3312633577361734
ENSSSCG00000000367	-9116703707642816	2.1922e+16	1.18659e+16	571710179737268	2.13001e+16
DGKA	-6868129032729344	2.48109e+16	7700817277922003	5519582774248617	1.57084e+16
PMEL	-1.59707e+16	5081556212446183	7631895069955979	5734501794862784	1.62123e+16
SUOX	-3311813285252574	4182807877617688	3.85137e+16	4.97055e+16	1.02131e+16
ENSSSCG00000000377	-3019950358052633	6147884997548362	1.28297e+16	7202043981053592	8073272010747987
ESYT1	-1.04618e+16	3643322485572669	3.73647e+16	979805	1.00279e+08
SMARCC2	-4013359272266414	4236214266527333	1.01455e+16	1.44655e+16	4865578933427011
RNF41	-4.63191e+16	4247007932048393	1307208296520386	2.9973e+16	1.2115e+16
NABP2	-3.15645e+16	6277203511647203	1.49295e+16	1116038646270224	4967697848261186
SLC39A5	-6449193563558087	2.81588e+16	807958030310875	4.47668e+16	1.30992e+16
ANKRD52	-2.84001e+16	3.20195e+16	2.86664e+16	9043365150310872	1.66111e+16
PAN2	-605499675176145	368886858413329	1101655395508546	9030179134459534	3.21693e+16
ENSSSCG00000000394	1.08522e+16	7704566467744368	1.38209e+16	239745105400682	3604989709497892
STAT2	-8008119473838975	3.70214e+16	3127115786152448	5760209995529043	6932282611056704
TIMELESS	-8989313837526091	216154918844941	1.05237e+16	1.17856e+16	4055737547854353
GLS2	5844114438799812	1.77791e+16	3.45763e+16	8524863662315187	9033263155241454
RBMS2	-4869117134639962	4515051920543563	1.28781e+16	3324497874426846	1.32236e+16
BAZ2A	-2573492514997601	5877524804888179	6702602863606277	9627227000012312	2.52935e+16
ATP5F1B	2757168577880175	895220711765581	1.4125e+16	1.71057e+16	733375390999309
PTGES3	1340104912241376	5765901478471504	2339053502060885	126166191917091	2165379722855072
NAB2	1.68705e+16	1.45122e+16	2.24227e+16	2.18774e+10	1.35243e+10
RDH16	-3.4567e+16	4.56816e+16	1.76482e+16	2.65772e+10	1.34644e+16
MBD6	-4000556693181459	6265308990557907	2015555928695872	7.13924e+09	4.02073e+10
B4GALNT1	1.60261e+16	-5359297709299701	2997434354246204	8339648687184775	1.55691e+16
ENSSSCG00000000435	-9556354915246060	2496935402159161	6844918096785019	888937747582117	2359957190323134
KIF5A	3.82726e+16	2950351791311559	2.71565e+16	9936851548978094	1.79219e+16
DCTN2	-1.1603e+16	6.60236e+16	2556709982490786	1.09827e+16	1.9412e+16
DTX3	2.07787e+16	1.96491e+16	6535792672888254	4188358974160576	550956853302225
ATP23	1.82131e+16	4368095363615814	1.73202e+16	8952956381335485	9314915781092748
USP15	-3.04028e+16	6093982105697678	1.20059e+16	530321861787641	1996526275209697
MON2	-4605056210929019	4812869433265947	1.85813e+16	1.62811e+11	8.59698e+10
RXYLT1	-6224870780868731	4153383175146665	1.2433e+16	7243852433641831	8103842444100802
XPOT	-3.52588e+16	4384507386409438	87138069158741	3158090295899122	9664361905152942
LEMD3	-5334967033533451	468613698811312	2064849410690709	5.51806e+10	3.17012e+10
ENSSSCG00000000473	2.09512e+16	6.33467e+16	4596703157849138	3203350047992909	7054656028259364
IRAK3	-1.58973e+16	2.56495e+16	3223735235917521	1.36442e+08	1.20028e+09
HELB	-7721309791913518	2402671045512968	834241756298608	3873002708217182	1.15327e+16
GRIP1	-6895916365650099	5084501545753666	1.40434e+16	1786368755993957	7626471515867191
MDM1	-3038598705651625	3.81719e+16	3347729902894466	672977623525445	1.30735e+16
NUP107	-3741462299958375	4427984912684781	1.11631e+16	8343888073942972	2.9966e+16
MDM2	-1.20943e+16	480814544606262	1.26787e+16	2.60167e+16	3.84099e+16
FRS2	-2509278396158939	3905333143894148	4202594828149136	4.03622e+16	8575469264348465
CCT2	-2.2206e+16	3.279e+16	1.68036e+16	194877260246321	3.06956e+16
ENSSSCG00000000500	5.55113e+16	6889455044620048	4094119224398378	5222681412801121	6455778107267254
CNOT2	-2928186700381744	5539904356803722	8441595166152148	3.66734e+16	1.10001e+16
PTPRB	-1.98726e+16	1.04796e+16	2.37591e+16	6259512515950182	7333969966852576
ZFC3H1	-1.19404e+16	495754365203572	1.16692e+16	2.80036e+16	4064350397243752
TMEM19	-1.97433e+16	6130067445944091	5143605484887736	2.33321e+16	5.39699e+16
TBC1D15	1976631680351751	4449771785040978	3.26006e+16	709866314453989	1.36516e+16
CAPS2	-1296607115601078	4303026106540024	480893032292963	4880180879314908	6156486418898582
PHLDA1	4198563064383178	3.28129e+16	1.56788e+16	5.6956e-21	2.86191e-19
NAP1L1	2.4275e+16	8331305310127274	6351700471855317	1.17269e+16	2995595729279238
BBS10	-7625206709056479	1.83389e+16	6.01684e+16	1416997889491276	3522059219120586
PKP2	4215553891871536	4150632402143096	1.24647e+16	724048269072054	8101650274269202
ENSSSCG00000000530	-7990160902989967	5846500346887879	6810468207049067	1.55042	28.6711
BICD1	-4300120711077449	3.91553e+16	6666410941046899	9824684164974108	2574879717120942
IPO8	-4088735253812159	4398806419904884	7572869774742276	5925336665793895	1666500937254533
ERGIC2	1614360455309315	6488029043570459	3.63014e+16	5.67422e+16	1.13914e+16
FAR2	-1.40411e+16	3.64022e+16	9691416388345022	3248943450096535	4.55322e+16
KLHL42	-2.00138e+16	4614731188379881	3.03423e+16	8617158012266061	9089985577355396
MANSC4	5260151319958082	1383249046391708	2.61458e+16	8715447274715066	9156399498915828
MRPS35	3759917345084032	4695069791649319	1.21722e+16	4.85074e+16	1.84716e+16
PPFIBP1	-1356059127865226	42077175510059	7932249531192662	0.000527556	0.11642
ARNTL2	6495557459111313	2837810091191249	1.42369e+16	7059369705633589	7964327261459764
TM7SF3	-1.85493e+16	3551609503552323	1.31049e+16	2523058643592087	375096314347534
FGFR1OP2	-1.57466e+16	4216689963072851	1.35755e+16	2.43962e+16	3654660760311126
ITPR2	-1.79977e+16	3005787496050285	553826839042408	99.2065	150.911
RASSF8	-2978089547600723	4361542624948255	5.18002e+16	2284804522565637	5306374605365685
SOX5	-9987954679350644	7286828910033305	1.66448e+16	4.41505e-24	2.34856e-20
C2CD5	571715922454782	4946289405448926	2.91734e+16	5891112903648739	7035779287255631
ENSSSCG00000000576	-2470150928168164	3.59039e+16	973635845428349	5.76974e-08	1.59617e-05
GOLT1B	-3005141934440136	3.8096e+16	5314119099177278	2.11533e+16	4962255088128174
RECQL	-7810000483036293	3280263742765986	1.72971e+16	3.19668e+10	1.5972e+16
PYROXD1	-1.89648e+16	385549957031431	1.8705e+16	1.71417e+16	2.77276e+16
AEBP2	166922099452218	4619766897530799	2.14828e+16	9883058036550848	9925852302853616
PLEKHA5	-6327095703789115	5140798272236459	3628767087579078	1.70237e+07	1.69304e+08
DERA	7154135686727128	4606519230254268	367073252769087	5446039342605494	6662667099111906
EPS8	9984241930739484	414473987598989	437710593927929	3691.23	4.3754e+06
PTPRO	-2.31978e+16	-205445929863795	1.91796e+16	1660819849492259	2.70371e+16
RERG	-1.58724e+16	-1382624328528965	1336108108927513	2.47721e+16	3.69748e+16
ERP27	1.34582e+16	4.00244e+16	4502544777079928	194491	2.38071e+06
ART4	-4.3961e+16	3.36916e+16	6613006616080241	4.16101e+16	5482381377495986
ENSSSCG00000000611	-5779668287863946	5652228150851951	2.78973e+16	5973748909144994	7107874521858057
ATF7IP	-3.35163e+16	5596486621266246	9362927512660962	2.21418e+16	7083985352330912
FAM234B	4.1721e+16	4060232210343114	1.32297e+16	2755434675878209	1.12269e+16
BCL2L14	1.16799e+16	-4.49101e+16	1.66082e+16	1.97493e+16	3100559118822137
LRP6	3040314560618782	5559526483178426	9955812101240204	1.60342e+16	5319539811712285
YBX3	-1.80167e+16	1.07702e+16	911702478010102	2.53241e+16	7958820593801787
STYK1	5716789099374598	-3.5638e+16	2.48841e+16	8746562906346599	9180408439650412
MAGOHB	-1783801295708845	5.30571e+16	2.29304e+16	1.29956e+16	2219585552148111
GABARAPL1	-1.04255e+16	6105953551017442	1.1955e+16	2742221616589309	4001999109493788
CD69	-1.75406e+16	787551886455231	5378859826344677	2038219437873938	4808200384855916
CLEC2B	-7321481823088927	-3530508959880428	1.26551e+16	2.60611e+16	384459221934492
ENSSSCG00000000657	-956000932121803	-7551160834205114	4891870231882112	8249556081163459	8830575682184475
A2M	3.91672e+16	1013045329211896	1.32747e+16	2.49257e+16	3.71685e+16
PHC1	-4.26553e+16	3.75906e+16	8615415439202724	3.3333e+16	1011953626695036
A2ML1	-1.47791e+16	-1.43565e+16	3.33235e+16	6792989004393098	1.31621e+16
RIMKLB	-1197281060252644	4102724655442319	6088713106326935	0.604427	1002.63
AICDA	-1.48486e+16	-6681648064920979	1.12229e+16	7376201790299501	8200802338782861
APOBEC1	-1.0313e+16	-3.41682e+16	1.03882e+16	3080962220153413	4.37436e+16
CLSTN3	1.54219e+16	3650034713109131	9585741389685652	3.27546e+16	4.58232e+16
GPR162	-1.81334e+16	2648705954881549	4.34163e+16	44248.9	522349
P3H3	-5037869640491053	2.79069e+16	6808136376210187	9074342215564276	2.40056e+16
GNB3	-8873863932183143	-1.62534e+16	1.04236e+16	3.07274e+16	43655597103646
CDCA3	-3022560726974601	5129243462725606	3.86777e+16	5339983290941966	6563118592268758
USP5	-1.87751e+16	4.98155e+16	2.47854e+16	1.15409e+16	2019575241670402
TPI1	-5.75998e+16	7699914501445595	3280015669169547	5668382141034833	6858165405457027
LAG3	2842223383272972	-8568996779709223	296709010046	9956538643111292	9972827868882340
MLF2	5.06621e+16	677027278620867	4826728919021035	4872140944774852	6148828389314013
COPS7A	383337382207649	6085383777723442	2518485448229928	6157764574836764	7255980252527379
PIANP	1904787164450469	1992665544175724	8417681978517278	3715892425297943	1112830685491052
NCAPD2	-1.84932e+16	2.3999e+16	8277062865674227	3.62937e+16	4948744178591184
GAPDH	3595266886585316	9974295125475748	2.45115e+16	7.38665e+08	4.92491e+09
IFFO1	-1509412560494707	336666871608304	1.00575e+16	3159229938814487	4461596853119279
ENSSSCG00000000696	-1.6534e+16	3538579710863475	9548666232184840	3.28484e+16	4.59083e+16
ENSSSCG00000000697	-4312662504311706	6363773336279912	2.44894e+16	7.47201e+08	4.97462e+09
ACRBP	-4.45624e+16	496063018859978	1.89725e+16	1.32619e+11	7.12277e+10
ZNF384	-7521514039048652	2108570536965775	8666276984174152	3.24153e+16	98880937192161
ENSSSCG00000000703	-8741845461764053	1.72194e+16	9116057740608198	2.53375e+16	7961577252394998
TAPBPL	-8816560724916891	7035209433733581	5.27164e+16	8184022452992006	8789319923607327
LTBR	-1.61471e+16	4631160108060774	1.09078e+16	1.56032e-09	4.9434e-09
SCNN1A	-6577716182253593	9623343452046442	2.93411e+16	8672662523303123	1.60655e+16
TNFRSF1A	-1.75042e+16	3578415363143802	8253326256320693	0.00103907	0.0240058
PLEKHG6	-5567683074150505	1.87697e+16	2504186911057978	1.13544e+16	1.99504e+16
VWF	-2.97587e+16	-2.87812e+16	1.39729e+16	2.37178e+16	3.57541e+16
NDUFA9	3.77052e+16	6253519935505389	2.53634e+16	4.74852e+09	3.2881e+07
AKAP3	6957233419130347	4081349152989926	407420895387544	5232814681702187	6464594727197849
DYRK4	-2.02272e+16	9498708172847328	2684004459604008	6044067903663096	7163847762852174
C12orf4	-4.29285e+16	4190783786779649	1.32141e+16	2778553218096535	1131577616112802
PRMT8	2884703053755476	2.43046e+16	1.37462e+16	9.55653e-17	4.03693e-14
CRACR2A	-3875016164111562	215559953284153	2.91141e+16	879549821298845	1.62424e+16
TSPAN11	8419509523411378	1.11212e+16	4996795745483103	2539429006861917	5801571968884563
TSPAN9	-51582036974252	1.98456e+16	3.76803e+16	5.22412e+16	1.06369e+16
TEAD4	-1.94382e+16	-8761441533242448	8193221116763005	3.65378e+16	4972597438554773
TULP3	-3308861424793601	3.59858e+16	4707149119248261	3003742420629936	6685974508531183
RHNO1	-883509915147137	3121723082865658	1.30179e+16	3085283362092856	1.24095e+16
ITFG2	-6291567763481409	3273392363155817	1.3028e+16	3068709764842758	1236033996227534
FKBP4	-3.51053e+16	6938854065760581	2.3022e+16	1.60155e+09	1.00961e+11
DDX11	-4176077955954097	4437009409550246	1.23754e+16	4.35025e+16	1.68034e+16
WASHC1	-1639798671498672	5197324356056556	3.06612e+16	7994028952213096	1.50461e+16
IQSEC3	492057916272307	27289387352484	4249872441436244	3.92533e+16	837388164779628
CCDC77	-8816898112306286	1.67579e+16	7943177089964832	4826901585037871	1.39701e+16
WNK1	-3495247332337302	5296709019075223	1211998312725068	4988435510190769	1.89041e+16
RAD52	-6680244490999497	3.18048e+16	1.36748e+16	2.17357e+16	9072765908432956
ERC1	-1.18146e+16	5186571577850967	1.11976e+16	3.61645e-11	1.17161e-08
ADIPOR2	-9015309469247992	298365793817995	1839751517197854	6679790818967186	767303840857045
HDHD5	-305023766415469	2694511358865675	1.54513e+16	2138561759822674	3.29767e+16
IL17RA	5394947958572276	2632918406951153	8649949023210688	3.27071e+16	9967239351735356
CECR2	-950185245789468	3.04873e+16	2005945795934798	7.50713e+10	4.2104e+11
ATP6V1E1	4743371111769978	7403713052160297	5127319617226884	4739585963218778	6032550334249733
ENSSSCG00000000769	2419342717070391	5303027418548138	5120764986887042	2364119261875753	5456755789263239
MICAL3	-9513112169960368	2.98048e+16	2.24302e+16	2.17915e+09	1.3476e+11
USP18	-1.60639e+16	2187474240545495	2.42057e+16	8.65746e+08	5.71472e+09
ENSSSCG00000000777	2.35506e+16	1.12018e+16	5619307656198509	4534833521854297	5842022861578416
CPNE8	27837025406289	7739058934336446	8686274823457484	0.00011632	0.00289289
KIF21A	4439771214011502	6161791097396821	2.01932e+16	7.00006e+09	3.95043e+11
SLC2A13	-4.61923e+16	3824363537666081	5670810014927808	1.72495e+16	4.16788e+16
LRRK2	-1.29617e+16	5778654013029402	5331356017846468	2.09451e+16	4923231288820915
CNTN1	-1.59639e+16	761686819013885	1078572511812533	2990171144280821	4275363298208216
PDZRN4	-302258677863152	2.14733e+16	5303559825238487	3275.58	47222.8
PPHLN1	6614650307300621	4.32206e+16	2.23899e+16	6360852389739544	7420922692558115
ADAMTS20	1.95762e+16	4234092461049251	1.00386e+16	1.53293e+16	5.11818e+16
TWF1	2.28386e+16	5523684037349555	5714400215002872	1.68263e+16	4083377753223683
IRAK4	-1.47219e+16	2.42573e+16	4222275970656497	9481906866066128	9664391625930572
PUS7L	-2668538777555635	2.3629e+16	1.06314e+16	3.02501e+16	4.3134e+16
NELL2	-2568091610256996	1.47045e+16	1.89022e+16	1.37597e+11	7.37633e+09
ANO6	-1136514113215804	2.83639e+16	2.39505e+16	1.2172e+16	2.10627e+16
SCAF11	-2.74873e+16	5655219255356753	9412821372118218	2.15473e+16	6905326233702367
SLC38A2	-9589175888498588	4582917870886696	4774988479685571	4842.13	62653.2
AMIGO2	7543513376831666	5210674055136175	828368301295094	8.9114e-05	0.00206713
PCED1B	-1.66463e+16	3.3387e+16	5604573442787322	4540760302972434	5848123622449342
SENP1	5361574065150179	1.88502e+16	3990428591695405	8416678391524904	8950543103469595
CHST11	-5178718231274825	4248877522115143	4892704669	9982351239554274	9989256005942048
SLC41A2	-2.72954e+16	3.4127e+16	1.95429e+16	1621251275816229	265081735496563
ALDH1L2	-1.37293e+16	2.54177e+16	4.34137e+16	5099657342175644	634832750396513
WASHC4	-2.16934e+16	5237439530222525	4411052691375366	3570680007454201	7730268801466292
APPL2	-6029544655864787	5280146579796689	318515564596367	1.66416e+08	1.44858e+09
KANSL2	-5912230549724062	4895886297156214	3073233772033097	5793273313690849	6958948768495584
TXNRD1	-2.41289e+16	4618971643627561	4381920784049722	3632204397747585	7839830030705025
NFYB	2435727923813526	4753698622015267	4211221535965175	4015740889252803	8538279573929441
HCFC2	-2.51796e+16	3.61737e+16	2682767730301534	1014392873940932	182324133719595
TDG	-6199470338032375	4668920088390974	1.83765e+16	1.81281e+11	9.49949e+10
HSP90B1	3.73688e+16	846439246110195	1.79663e+16	2.24855e+11	1.15545e+16
NT5DC3	8805013322754936	3.81917e+16	3.18998e+16	5722103539816169	6900017521326038
ENSSSCG00000000854	-8195934266713582	5273103324514034	2559863247234162	8728844406749829	9167006770598484
PAH	2158876526164965	3683551359764219	2.2946e+16	7.81888e-37	6.12538e-35
NUP37	6444384003917073	4146244859499279	1.70002e+16	967111529632209	9792707369256284
GNPTAB	424037752851781	2.83409e+16	4.46186e+16	3465979887351517	7531034210603049
SYCP3	1.34934e+16	-4.55681e+16	3250351285737791	7140815212504706	1.37112e+16
CHPT1	-4426430637162356	4333714546767379	1323405016270705	2.74909e+16	1.1209e+16
SPIC	-6214946137279007	2.50286e+16	7670657424141905	5612600402630095	1.59258e+16
UTP20	5975620471310488	2770923141132051	8946623776510846	2779828833570771	863716422329047
ARL1	3675400231761893	6588996398927216	2.13284e+16	3.86953e+09	2.28395e+11
SLC5A8	-5114036542549619	-2590201792922296	8094894872901298	4.43901e+16	1.30047e+16
GAS2L3	9165827938809138	2.28917e+16	2906897222439755	8820141328379974	1628093989446598
SCYL2	-1485283339835169	4549136867754371	1.20352e+16	2726184919070372	398252221394964
APAF1	1510550994411908	3.45942e+16	7517664673152602	3859175324418304	51853910208378
SLC25A3	317915278164507	9231061350211098	1.46354e+16	1304421702608518	5724906555757018
ENSSSCG00000000887	-6974774014087705	1.77132e+16	5428036138984542	1.9816e+16	4691962114748649
NEDD1	-5637339759535049	3.6876e+16	1101349639600936	9045086808932508	3.22091e+16
LTA4H	1.40508e+16	4497707492072647	1772544995835812	8940850659416016	9309222564793996
AMDHD1	1.17868e+16	4255244096216495	1.01221e+16	8.22561e-09	2.37071e-08
CCDC38	-6159497730136106	1.89748e+16	4985260257499526	2556413945780909	5.83496e+16
SNRPF	3157958828354701	7305493411049676	1.71357e+16	3.48025e+11	1.72419e+16
NTN4	-1.00428e+16	3526709037030044	3322868440019682	8.1933e+06	7.41268e+07
VEZT	2.9925e+16	5939666523224264	1.27468e+16	7210714395967567	8076984361712602
FGD6	-1438148207156553	3833086754198358	8324677079831346	3.6156e+16	4935830079994429
NR2C1	-2.3903e+16	3784086429453914	1.83739e+16	1752566172746009	2.82479e+16
ENSSSCG00000000905	2.06088e+16	8239459414987278	6.73311e+16	9463926461396236	2.49176e+16
TMCC3	4425664197530441	3205646428461034	4182803438015279	4083609862155691	8655886849619153
ENSSSCG00000000908	-5533519397517413	7711153059694732	4997643762548769	4796036715080001	6081924161506872
CRADD	3.84558e+16	5319310595683405	1773865189373665	2.53425e+11	1.28995e+16
DCN	-753704035696589	1.3812e+16	1.80735e+16	1.78826e+16	2868645193687577
LUM	2515591846074124	7084939150391035	1.748e+16	6758802385061704	7733657871744591
POC1B	-335792801458039	2.67417e+16	2.664e+16	1026424577653155	1839761616791855
C12orf29	-635645049808237	3730392122549561	1.70293e+16	3.68075e+11	1816661223558256
CEP290	-8538246719310852	5571013239620008	9188867236875966	3.37767e+16	4.69432e+16
TMTC3	-4.26771e+16	4667395281981876	1.12628e+16	790751816403788	2858348900108911
LRRIQ1	1273672314761245	3720900391793502	7083456813187006	9329266170730440	9564959904186572
ACSS3	-1.79182e+16	2.89362e+16	5.02901e+16	1326.17	18011.5
PPFIA2	5558082067219466	2.09386e+16	764385167940058	5696614848635202	1612699686534621
METTL25	-7729002354203388	5329907344853142	5.03547e+16	12832.3	174421
SYT1	6682836633062703	1.4585e+16	1.70189e+16	1.92041e+16	3.03566e+16
E2F7	-7804079171616174	1.2754e+16	1.47554e+16	9033172610308444	9374916375503908
CSRP2	-8391000715314965	3603445445762784	2188051007029398	2.90166e+10	1.75612e+11
ZDHHC17	-7377266739184589	4468466280116554	359643387968962	5487043554064114	6698346836252113
TBC1D22A	-2626504906113321	3824978897403457	4001441772163345	4546136009053187	9470887721024016
DYRK2	-1.02173e+16	5353496095231609	7986769939548975	0.00400338	0.0089145
LARGE1	1.09746e+16	3.76781e+16	2.171e+16	3.17133e+10	1.90778e+10
ENSSSCG00000000960	-1.64834e+16	-5243811134681001	5925630073946184	4414297275793134	5727652905841653
LMF2	3.23306e+16	4.59565e+16	1.0046e+16	1.52683e+16	5102404396482493
NCAPH2	1.44911e+16	3356744584588383	8115543003736292	9282186291041756	95327422670781
SBF1	1.01552e+16	3225981757090564	2.43052e+16	6220107037743015	7299213235888939
PPP6R2	4609397048217503	5536654975059185	2498227771930317	9601365135030356	9746092004573248
HDAC10	1993706689611925	3015739829317934	1.15893e+16	2.81687e+16	4083843935794051
TUBGCP6	-4.43118e+16	3465550513461437	8625135366127434	7689980001163368	8434787699498278
SELENOO	-4256422291233916	3248801170347037	4877204635234705	2721365699231222	6153599819765168
TRABD	-2850428732675269	4202777930933639	602077330787502	1.41385e+16	3.51473e+16
PANX2	7065339225719014	1.64531e+16	6656494036335417	9879510134280496	2584953860309189
ALG12	-7183453830314931	4237785441550965	2625693627676764	6083604377505144	7198333203782862
CRELD2	2.34636e+16	455872664238478	2390639576685194	1.22064e+16	2.11073e+16
EXOC2	-2.37202e+16	4909884116959304	5161085245775161	2309845979928038	5355556299013269
GMDS	3.42791e+16	4715881303376042	6809340080016064	9068227198559018	2399307580091567
RPP40	-1.38285e+16	3204328467244295	7512745151036171	9309289796625764	9549765469010478
CDYL	-5737747316641907	2424118462812386	5127288263453245	235524969905628	5439926100674751
ECI2	5454123369373984	6259580832803206	3746961536007558	92848.2	953749
PRPF4B	-1.82043e+16	6192245601563799	3364037168552432	6663452471820742	1.2972e+16
SLC22A23	-1074339010343017	4032869995300874	5.1391e+16	756.85	105111
ENSSSCG00000001005	-3.07621e+16	1.41578e+16	9601351055602680	1.94434e+16	6323975179670733
BPHL	1.3941e+16	6644880189602808	2791849162692941	9474483947464846	1.72432e+16
RIPK1	-2.22293e+16	3.06152e+16	1.31226e+16	2519862065867466	3748150746977283
WRNIP1	-2900747682963686	4.43849e+16	5102152001767048	2.38962e+16	5508233843543198
SERPINB1	-2322096670915537	2.85005e+16	1.78493e+16	8937180133115025	9306898005250844
ENSSSCG00000001021	-940708709181296	2.94881e+16	2140679110974761	3.71453e+09	2.19924e+11
SSR1	3856865307095509	6826908880582273	2.01551e+16	7.14096e+09	4.02073e+10
RIOK1	-1843408931315505	3.02773e+16	8823696008494863	9251611637758936	9516653331947196
DSP	-1464490443458532	4923239248050542	8049762317466528	0.00291055	0.00654873
BMP6	1.624e+16	101104900512458	2585785233787027	3.67507e+08	2.58424e+10
SLC35B3	9151361505007568	4578649178826777	4738472417186719	5833.55	74475
ENSSSCG00000001038	-2.75735e+16	8293458839526606	1.49206e+16	1.12131e+16	4986004204113374
C6orf52	-1.56499e+16	7055039591574499	8647106441120276	0.000141797	0.000349124
PAK1IP1	2.27001e+16	4719847058757715	3.7881e+16	5.16184e+16	1.05333e+16
ELOVL2	762937163159042	3.30359e+16	1654146169472041	4.75978e+11	2.28573e+16
HIVEP1	1.39844e+16	3.58726e+16	8561821365336719	3548093036820915	4.86719e+16
PHACTR1	5929930565812727	5195058044743574	1.92926e+16	1.1214e+11	6.10079e+10
TBC1D7	-581011533205931	5155562891864511	3.5453e+16	551560050490804	6723344982112601
RANBP9	-4891399881990474	4096675701920705	9134516116444516	2.50832e+16	7891723114410052
MCUR1	-2536810058494211	3.88984e+16	2447838917496333	1.17687e+16	2.05193e+16
JARID2	-501232908063711	6069262897073606	3.15148e+16	1.97929e+08	1.69885e+09
DTNBP1	-3.95824e+16	3824528784215596	6125684835115214	1.33232e+16	3.33718e+16
MYLIP	-2088318723806874	5719558801618876	4532491733598568	3325716085467016	7283191452734945
ENSSSCG00000001064	9824632740796798	4951147507958799	1.11364e+16	4.92546e-10	1.58674e-08
ATXN1	2.03526e+16	6784044786540342	825407592133305	4066060052035091	1.2041e+16
STMND1	7401078242136779	1767567993689412	908868307468694	2.57196e+16	806692105477607
FAM8A1	-2760641869896684	3548688646407265	3.17992e+16	7454830577259995	1.41924e+16
TPMT	-2042896609802654	3404039453895781	1.49827e+16	2209384065236745	3386582565310859
KDM1B	-3473087829652452	3.38688e+16	4842541099532803	2.7766e+16	6258186228727745
DEK	2.34538e+16	6988748989457036	1.18247e+16	5845160277215673	2172554181104424
CDKAL1	-2.10195e+16	4515313878220769	3.19252e+16	7397593946988912	1410683023637463
DCDC2	-1.56904e+16	6816482254303526	1.15727e+16	5.45382e-12	1.82873e-09
MRS2	-4073124301934218	3.57443e+16	4009108213044829	4.52551e+16	9432474703120092
ENSSSCG00000001088	-4.37237e+16	9932373220533184	1.44824e+16	2288101946858463	3480313922346272
GPLD1	-1667384503558052	1.896e+16	3635733511560728	5465283543055531	6678542389716541
ALDH5A1	-811433958674561	4632405751018663	5860119106460848	4439654450582444	5749732826554586
KIAA0319	4.06115e+16	3.19872e+16	5110609353651791	2.378e+16	5485848299677758
TDP2	-1.46258e+16	5335936884732249	1.48606e+16	2228284856715355	3.40919e+16
GMNN	-5659145405188871	5.1594e+16	3.15295e+16	1.96431e+07	1.68977e+09
RIPOR2	-6878363087402852	1.20841e+16	3031504549223044	8166225970273798	1.52984e+16
CMAH	4078120136705805	2.36163e+16	8512206103589675	2.80503e-06	0.000678999
CARMIL1	6178307991820828	2992426969468461	8960321201892286	2759063807559608	8583477386875423
SCGN	1.05353e+16	1.04259e+16	4371910448767768	379053	4.49002e+06
ENSSSCG00000001105	7903170554463764	-4251487633168986	471355498846167	4.92364e+16	6192193921158441
BTN2A2	-2.47241e+16	4.45741e+16	8362012805575592	3.83146e+16	1.14208e+16
H1-3	-1.15063e+16	6109506563638156	7940728800872797	0.00505393	0.0111672
ZNF322	-4.56464e+16	4001734370189651	1.35519e+16	2320595908842063	963746276840794
ZNF184	-4945345960071301	2960053059714771	7783698200054173	5271976537773271	1509093433458268
ZNF165	-283474895541154	2.54649e+16	1.92232e+16	1.65601e+16	2.69691e+16
ZKSCAN8	-1.01382e+16	8417933434321058	4906438555664331	2675675590632461	6.06461e+16
ENSSSCG00000001202	-6924376435438468	3.97578e+16	2.36226e+16	1.17202e+10	7.54849e+10
ZSCAN9	-1.22888e+16	2.98063e+16	3199014362033374	1.54957e+08	1.35293e+09
ZKSCAN4	-1.47828e+16	211750877431475	3990623652188674	5275738881424575	650224253585187
NKAPL	-1010478331526115	3191893001919047	3.01177e+16	4.06601e+08	3.34979e+08
ZSCAN26	-1.01589e+16	3.42212e+16	3.46117e+16	4.02489e+06	3.80521e+07
ZSCAN12	-1537523568183832	2324480589825466	3.04158e+16	3.48683e+08	2.90037e+08
ZBED9	-1524765033697636	8438855733979255	9948246240727066	1.61003e+16	5337829725205293
TRIM27	-2.24339e+16	476509442428821	4642724660805488	3118545280097161	6899631309688647
ENSSSCG00000001229	-2.21498e+16	6761807043715548	4858147298964454	2751586888650062	6.21216e+16
TRIM26	-3.63044e+16	1.99057e+16	2186086834038111	139262728865361	2344854564277547
GABBR1	2577315699701857	4213916101772487	3.59797e+16	5785004033227183	1.1564e+16
POLR1H	-1.76672e+16	4944671822244219	3.31958e+16	6845913374906779	1.32498e+16
ENSSSCG00000001297	1.33236e+16	-4.30162e+16	3.78378e+16	517517227449628	1055551410070336
ENSSSCG00000001341	-1011037821308024	5417224761407729	8513375083286016	2.7885e-05	0.000675946
TRIM39	2139122125218957	3.45498e+16	194116393625389	1635422114432111	2668707140558657
ABCF1	-2.0604e+16	4937362230959365	4.17013e+16	4.11425e+16	8706592487717411
PPP1R10	-2.3072e+16	5420269808801293	5620609562360624	1.77505e+16	4275145649348537
MDC1	-4209883260500758	3919779459150871	9593458777696512	1.95272e+16	6345227744174459
GNL1	2.78451e+16	5404430167542818	9892312077554748	1.65971e+16	5484097150236675
DHX16	-5444001977015747	2877237317556338	7.46614e+16	6287014349147492	1.7542e+16
TUBB	-1485147426582606	7713159348453487	3.47076e+16	6.24626e+16	1.23202e+16
DDR1	-6712284292401112	6594217068790174	6280743086992056	2.27937	391.675
VARS2	-2974663953990664	4054707481700122	1.32766e+16	9082675591673720	940744674414042
TCF19	1.3661e+16	1.22598e+16	1.65033e+16	4.85651e+11	2.32829e+16
ENSSSCG00000001393	-4.28518e+16	1325499305987676	1.24711e+16	2.64105e+16	3887342358510703
ENSSSCG00000001396	-7453949809550884	4125946296703901	3223655483440505	1.36498e+08	1.20028e+09
ENSSSCG00000001398	-252151728722278	3.61937e+16	9696919851152024	7.04142e-08	1.94486e-05
DDX39B	-6524565091927988	6375408904752065	6523590314996497	93562586399266	9581409248908792
ATP6V1G2	-3045462575127912	3089990517688664	32387126115963	719171284149774	1378438287624706
NFKBIL1	-2999588180845184	4801800351076272	7232584070595554	7159208525067157	1.96136e+16
ENSSSCG00000001407	-1.28801e+16	4239737182624156	7420690828063776	7.03437e-05	1.43987
PRRC2A	-1.63722e+16	602478588925022	3.59503e+16	5795255941677162	115764066011597
BAG6	-2.32757e+16	5405332884949186	6648898241808981	9921715743729386	2594065091674393
APOM	9666646329205086	1.07711e+16	5299060875443704	2.13369e+16	5000569877137452
GPANK1	-2.41296e+16	5153887932286011	5778637840265432	1.62221e+16	3957439439193475
ENSSSCG00000001414	1.83667e+16	757354291963208	6855140422459742	8838660978429428	2350112958396038
LY6G5C	-435000201742824	9974213218471632	1.27687e+16	2584825013060532	3.82399e+16
NEU1	-4.81098e+16	5195430165049468	1.77287e+16	2.54752e+10	1.29594e+16
SLC44A4	-2.26522e+16	3.18305e+16	8159394821494189	0.00167125	0.00382016
EHMT2	-5461659293330123	4499959297939339	2.25437e+16	2.05415e+10	1.27487e+11
NELFE	5.16612e+16	5699446656646319	2946234007329185	5872728662696988	7021120872751289
SKIV2L	-1044028964144198	3.4451e+16	5233072205743214	4694343153237761	5991193283008266
DXO	3.73435e+16	3.07201e+16	5479775684141042	8149157247327184	8762782307535242
STK19	-4.34063e+16	4127034588302697	1211692522511499	4996622442446806	1.89268e+16
C4A	3028269510178976	-4208919966074409	5339991403445943	8172493785302436	8782449831006827
ATF6B	-2.26546e+16	2308764161186271	8475254354327948	3.57253e+16	4889639084446852
FKBPL	-42928331253089	2414930106483201	3.75416e+16	5.26763e+16	1.07067e+16
PPT2	-4.03597e+16	2.95765e+16	4248924972663422	3927518488168928	837653522380788
EGFL8	-1.44739e+16	5396204247444135	1.28304e+16	9.63026e-15	3.74667e-12
AGPAT1	1598187958859402	5846765996039814	2974205647056662	846016493900445	1.57361e+16
RNF5	-7484973638634766	6255421747800056	8059190408640937	3693295448044251	501322933415042
AGER	-2810234440559017	2196312518268241	1.86682e+16	6656928590284004	7656978393856434
NOTCH4	-5180285793279202	3676043454517184	7642881795086929	5699678586888879	1.6133e+16
ENSSSCG00000001441	5.08505e+16	537741667606414	9955527092155360	1.90765e-08	5.41652e-07
ENSSSCG00000001444	-1.4628e+16	591786835701016	7837169451303006	5118268860091792	1.4712e+16
SLA-DRB1	-6393621490393284	7353247861930269	5706477681925879	4.50002e+16	5806092238851598
SLA-DQB1	1.47625e+16	4868983333452354	3.81633e+16	8451155215543454	8981664928155111
ENSSSCG00000001458	-4405192583709629	-1.80252e+16	539419892373223	2.02038e+16	4771340808111462
HLA-DOB	-3463497357499017	2507065504332335	2.12622e+16	8840668457306637	9247370326010796
PSMB9	-6857900074410034	2506301519598989	8301198256986599	3961892960096601	1.17608e+16
SLA-DMB	-6276890217016096	1361281185241944	3.66632e+16	5552276092721346	1.11831e+16
SLA-DMA	-2076411034315749	2.77337e+16	6473518009724545	1.09494e+16	2.82588e+16
BRD2	-4.25968e+16	6418218031821281	2023154662045495	6.86121e+09	3.88096e+10
SLA-DOA	1.49247e+16	2.16679e+16	3.40304e+16	9534813061121636	9702001600450548
RXRB	-3908308868536137	3.89639e+16	5977036426870006	1.44933e+16	3591554943409146
SLC39A7	9668250725480948	6048750889167997	9259748533288724	3.35911e+16	4673792584464054
HSD17B8	1.23946e+16	6979698692988061	1.85728e+16	1729391980745928	2.79266e+16
RING1	-1.05478e+16	5609486687379343	9372462425189044	3.32987e+16	464210282706324
HMGCLL1	5800393316289579	6247117015215244	5.26124e+16	4063.18	5792.3
LRRC1	-9496823402721884	2.37004e+16	8056032272142891	4535239520380792	1.32573e+16
GCLC	8278664060420852	1.76523e+16	8307338786682521	3.94852e+16	1.17332e+16
PRIM2	-4.83609e+16	2969390356010702	4542388434373045	3.30654e+16	724672687162961
ZNF451	-1812583629578728	4204865614824846	2182400586710162	1.39597e+16	2.34864e+16
DST	3315489593223573	5470818241372109	1.29154e+16	3258861292210917	1.29955e+16
COL21A1	-1850981051437067	-3256738079633	2.78159e+16	597910147577932	7111788401315154
VPS52	-1.1985e+16	4603650238573984	8073556997239342	3.68903e+16	5008306049990987
RPS18	-5.55911e+16	1121279222982478	1.11691e+16	2.90586e+16	4179109847700861
B3GALT4	1431655544651363	4818705830855049	1.9311e+16	1646383053922352	2683507843233567
PFDN6	2779347054908672	753632232252794	1319886987795552	2801179818013856	1.14025e+16
RGL2	9151146245148320	1.93309e+16	1.52818e+16	69585634883612	7891744536547034
ZBTB22	-3953285887413678	4746652508052233	8441051933719594	3668439843190883	1.10015e+16
DAXX	-4769663839956133	3610469719928821	1.07093e+16	1066007046091431	3715395639916241
PHF1	-5749125937454621	3689907000695159	1.61077e+16	5.98404e+10	2.81712e+16
CUTA	2474730142228224	7690617772720756	1082951208877994	998949581607738	3509355083369214
SYNGAP1	4056124153160849	4462019967624896	1.17917e+16	7313042372028359	8152289308436687
ENSSSCG00000001516	-7529458045229038	3772098031839183	2147798430147493	3.57914e+09	2.12639e+09
ENSSSCG00000001517	6946947317379459	2358263223691809	2.6507e+16	1.03504e+16	1851264769813149
ITPR3	-4.64037e+16	1.64852e+16	2.56545e+16	1.09221e+16	1.93268e+16
LEMD2	1.29107e+16	463415946800122	1004062617204184	3.16329e+16	4465507699686397
ENSSSCG00000001521	-9415769691637696	1.78645e+16	2.16239e+16	1.41425e+16	2.37222e+16
GRM4	-2.22848e+16	4904029707130838	1.35381e+16	2.44614e+16	3.66191e+16
ILRUN	6782974928495278	5.43143e+16	5038482772884434	4.77814e+16	606683789606792
SNRPC	-2.73559e+16	6900488350890628	1.30005e+16	3114077466808562	1.24833e+16
UHRF1BP1	-1.02933e+16	1.10971e+16	4097433703953554	4.29484e+16	9020410979896204
TAF11	-1.79677e+16	5812675749181518	3.11775e+16	7744345891905317	1.46578e+16
ANKS1A	2.10033e+16	3482562431602063	1.86226e+16	1.72364e+16	2.78468e+16
TCP11	2.96127e+16	594202190215678	1313554173751298	2.89746e+16	1.17584e+16
SCUBE3	-4.81725e+16	1.64587e+16	2893531516510433	8893578344544839	1.63884e+16
DEF6	-2.2273e+16	4962841988303602	4314031457951823	3779928282497469	8112959395870968
PPARD	-1802558225460907	2.30213e+16	7366816411374053	3.90726e+16	5231229439189108
RPL10A	1.18989e+16	6126654716012623	2.26709e+16	1.32147e+16	2.24998e+16
TEAD3	-4533684009833381	2657097254050781	3101887045900442	7820159894642542	1.47802e+16
FANCE	-9701626502799542	4969880187550913	7154260383138746	3.97648e+16	5299185307874483
FKBP5	3837345975931274	5650925783425166	8778690325906524	7670097314514351	8421080852061081
ARMC12	209317204645101	6510877591304044	3122992751764165	2.29205e+07	1.94694e+09
ENSSSCG00000001551	-1379550506418762	6667659400131017	8750226980884701	7673768461950273	8423689152664985
CLPS	-332321941850652	7363425138663985	8830584024858238	2962235707019547	9134752623095706
LHFPL5	7825879371305698	4488063140050447	5303930383860125	466441664864505	5963740425771323
SRPK1	876132864190243	5605987539930425	791673825744887	373594476798574	5056340013163527
SLC26A8	-1.34101e+16	1.01985e+16	4.13131e+16	838934777334885	8931811531191013
MAPK14	-3.81748e+16	5039237622004088	1.23394e+16	4435067465392103	1.70965e+16
BNIP5	-1.30552e+16	6216063202893114	9733828926437216	7550474786443904	8336121837387397
ETV7	256962447109134	3069655131229454	2347712413106204	125467004859615	2155955960872846
KCTD20	-1.04618e+16	4798385056192599	1.08745e+16	2970369473006935	4252372943539706
STK38	-6775870677225228	4130692787776835	2855232264671882	9.12004e+07	7.13499e+08
SRSF3	-1.7771e+16	8218658794259603	7078748030276644	7800349061214668	2.11183e+16
CDKN1A	4801367171049068	1.22203e+16	2.23281e+16	1.74089e-34	1.28773e-32
PI16	-7083726547841396	1.56177e+16	5507434599217113	1.89358e+16	4515198416640858
MTCH1	1831446681181562	7897022982453487	5560181399113791	1837351035112147	4.40305e+16
FGD2	-8561612969901873	4339653525099396	2.13301e+16	1.44158e+16	2.40822e+16
PIM1	-8498310245749968	213418774993183	5215943499584384	223806996670913	5211881620893373
TMEM217	-1.34021e+16	2400697718362878	3.21761e+16	5705513577483445	6886438496317795
TBC1D22B	-3684808128994012	3023415548998637	3788435544196483	5.16079e+16	1.05324e+16
CMTR1	-4428297932016263	508338825819667	1.90007e+16	662911083967211	7633132370507002
MDGA1	-3856244064732408	2.84603e+16	3.55888e+16	5922786443454281	1.17843e+16
GLP1R	76899117068608	1814468735433722	1.29194e+16	3.25195e+16	1.29709e+16
KCNK17	9446649617824252	4206625861716514	4.17719e+16	5180775218370478	6421016891170371
MOCS1	-5264834706530206	2.42351e+16	3843206750801418	4.99479e+16	1.02543e+16
LRFN2	-6290594814059437	1.84337e+16	512879633771944	2.3532e+16	5.43666e+16
NFYA	-3626325776343054	4144144291587727	7646331669447663	5688788519150371	1.61152e+16
FOXP4	1718657598821616	5556293003991849	352936424496236	6029090196611473	1.19617e+16
MDFI	1940483736898988	-8966390335799472	5.13991e+16	8206464589416534	88071665565218
TFEB	-1.80634e+16	3043197162525033	4967782060794306	1811.83	243200
USP49	9404757148015248	345983888590764	2.65076e+16	6066538040267909	7185045569270025
GUCA1A	-3003646331510323	2.73476e+16	8372355122067455	5.69033e-05	0.0134715
MRPS10	-6452023779044004	580617375210687	5812050272395517	4.4584e+16	576753621765414
TRERF1	-3204609420087603	3.51777e+16	3779956993596029	5186999382530771	1.05771e+16
UBR2	-1.7173e+16	5434749129591878	2.89812e+16	886830563875786	1.63523e+16
BICRAL	-2694908790380396	4.5785e+16	5549162625980953	1.84895e+16	4426546147267267
PTCRA	-4355278447052423	1302247509041038	1.82316e+16	1.76937e+16	2.84576e+16
CNPY3	-4800218520145241	6341176036605715	3.13731e+16	2.12906e+08	1.82015e+09
PEX6	-2.28513e+16	3.74912e+16	2.57181e+16	1.08783e+16	1.92686e+16
PPP2R5D	-4856902132059734	3892897503508784	9468922092101764	2.08982e+16	6730674646014659
MEA1	1.46638e+16	6911227271567473	4221463155154045	3991572682434605	849213124080489
RRP36	-1.02383e+16	6079058455473088	1.52992e+16	2.16125e+16	3327601477032451
CUL7	-2.40338e+16	3.8704e+16	2.30184e+16	1.29221e+16	2209192521684083
ENSSSCG00000001658	2.68042e+16	5752063205180723	9590798345052964	1.95555e+16	63532303612641
KLC4	-7014542232021238	511317336647898	3326541172252063	8.04e+06	7.28546e+07
PTK7	-2013937026723735	4670522209745943	1.64227e+16	1.34933e-21	6.96278e-21
SRF	-5498076945434978	3.42668e+16	1.06158e+16	1.12123e+16	3.88929e+16
TTBK1	1.02581e+16	7431617443823835	4682162974652316	3.04774e+16	6767291178420999
ZNF318	-3.04294e+16	4089567107038982	4.96606e+16	2.58494e+16	5886828948821574
CRIP3	-3.87714e+16	4.59675e+16	5997291651932093	4386813804876779	5702295491896168
LRRC73	-2629367281377597	3.9807e+16	3601515018541276	5772694073989312	1.15461e+16
XPO5	-1.13822e+16	4463246013913121	6067081775356087	9379143812957662	9597750518382322
ABCC10	-1.37239e+16	2912013559996578	3.93374e+16	5305310554465464	6529350714525298
DLK2	-2.17185e+16	1.85711e+16	6394270465115692	4.23918e+16	555620878784293
POLH	-7814066489430824	3.93797e+16	1526961289963856	9.32039e+10	4.2173e+16
TJAP1	-4.59256e+16	4129858855188242	8701073159794745	3.18023e+16	9723474105871492
GTPBP2	-6319241116629055	2.32383e+16	7516361684352546	7839617905428133	8552175112352294
RSPH9	-5.10464e+16	5.04743e+16	2.49684e+16	6172978219245898	7269239387335986
MRPS18A	-3361096070541142	6063842265728953	1.4742e+16	7010133349984473	7933836499357501
VEGFA	-2272369362869808	5.38691e+16	4394299462850695	3.60593e+16	7791894879436945
ENSSSCG00000001696	-2924177625761506	7288669459046451	1.47579e+16	1.22232e+16	5387917876178623
TMEM63B	-4702351423619186	4.99222e+16	2.21438e+16	2.52975e+09	1.54499e+11
SLC29A1	-2.68045e+16	4.55399e+16	4726753327883925	2969689179369312	6618724040660816
HSP90AB1	4976002283633715	1.03041e+16	3200918795023595	5715524339743763	6895044375943228
SLC35B2	-2709034858407464	5745974152491604	9912699818325484	1641421523947039	5.43097e+16
NFKBIE	-7005413476015184	2632149272761941	1.13364e+16	760035466444299	2.75599e+16
AARS2	-638429467066092	2.62381e+16	5925128375022123	1.49265e+16	3681416422631623
CDC5L	-1.25431e+16	7044336948946964	2787739304497149	9498814661655912	1.72713e+16
SUPT3H	-3.33447e+16	5003775172811947	9945563753587308	1.61237e+16	5.34306e+16
ENPP5	1366746468973221	3.98138e+16	1.301e+16	2.54031e+16	3.76945e+16
RCAN2	-1.62753e+16	5304457595541622	1326023741712075	1.10461e-15	4.49008e-13
CYP39A1	3.26599e+16	3588656355533537	5.54499e+16	1853369305205809	4434655001419147
SLC25A27	4.01538e+16	5157584966516087	1.29271e+16	3238582687962857	1.29236e+16
PLA2G7	-5824166761757952	2411312706351465	3546789903939863	5966076575672106	1185716441209741
ENSSSCG00000001724	-2.57649e+16	-2411376601252096	3.16897e+16	7504980036663797	1.42784e+16
ADGRF5	1.60453e+16	1.76322e+16	5902696065657677	155.526	2502.8
ADGRF1	-8669337166508738	-5825912771386956	6656654461145273	7964031013609755	8638059593039936
TNFRSF21	-1.05961e+16	1.26612e+16	5921426719678411	1.49578e+16	3687048043747696
CENPQ	-1.34911e+16	2.88739e+16	2984820183657562	4.6723e+07	3.8237e+08
MMUT	-376785461681346	3.76072e+16	6611839064044979	1.01303e+16	2.64299e+16
PAQR8	-7576175644841346	4447998932769658	3.3978e+16	557382	5.1787e+07
CHRNA5	7266300424381408	8247301677384528	3.77497e+16	5202494224067196	1.06025e+16
CHRNA3	-547919058567583	1.17674e+16	2.1095e+16	1463874260777774	2436930916588459
HYKK	1.55184e+16	1.10412e+16	2.26682e+16	633994723247417	7403549735869118
IREB2	-2.04023e+16	5.93909e+16	567330452805211	1.7225e+16	4163191803816424
WDR61	1.83198e+16	6.61376e+16	5284341643682637	2.1518e+16	5.03206e+16
CIB2	-7693228681465248	5062257611325164	3.06402e+16	3.10592e+07	2.60109e+09
ADAMTS7	-3233555303955808	3.21174e+16	3.75259e+16	8463983335037947	8991409252513235
MORF4L1	4.99808e+16	8108079016721836	3.58491e+16	5493454757482423	6704411042714173
CTSH	-2.63184e+16	5184467935455425	3.23434e+16	7210941657873414	1.38136e+16
RASGRF1	5290915949573066	3444865599732831	1.2643e+16	2.47578e-13	9.39871e-13
TMED3	1.78589e+16	7578822691206392	3827939408667678	3.06678e-69	5.68343e-67
ZFAND6	-190684399827176	8240732890777807	5458354988417635	1.9475e+16	4627756204766724
FAH	-5439796716575243	6686123623506778	2773419960397554	5984486824323176	7115738559310794
ABHD17C	-5747932204031534	2.87075e+16	6699699420886063	7957604099088688	8634653920950415
IL16	2.96169e+16	1.48602e+16	1.03182e+16	9190913976226108	9476841303036612
STARD5	-1.67506e+16	2171846851557501	2.53018e+16	4.9024e+08	3.38921e+09
TMC3	-5057679654419562	-7174904456955608	1.3842e+16	7098565631015777	7995567951421041
EFL1	2.92772e+16	3.53159e+16	442754790816311	8333419192275082	8886127561644561
SH3GL3	9902634136600456	1.37466e+16	7909531138117478	4917501310327346	141988834115416
BNC1	843380210291136	-6220539652606619	7187388902711156	7886276873875214	8586769974176468
TM6SF1	3653423214901878	2400957179448442	1.87844e+16	1705115043422205	2761997911032115
BTBD1	2.02889e+16	5168962909350685	2.81568e+16	8667406949638895	9123168363077216
HOMER2	-1672515354885878	411282564474313	8153777858461291	0.00171943	0.00392509
WHAMM	-5308310516322126	3234323798566162	7521926099020364	609524729590136	1.70788e+16
AP3B2	2.65743e+16	3.62662e+16	2.51719e+16	1126113523851275	1.98127e+16
CPEB1	6358663424696472	3436161771898728	1.60809e+16	6.06938e+11	2.85418e+16
PDE8A	1801139713967141	3.92973e+16	1.13409e+16	2.86904e+16	4139638729743072
IQGAP1	1263438064553743	5.59127e+16	1.6572e+16	1.97982e+16	3.10569e+16
BLM	-6922068157910989	1.65999e+16	5216569025889038	2237264995160432	5210711106971628
FURIN	746727167607525	4379723441536645	3668547583965329	138810	1.39254e+08
FES	-1.94596e+16	1.8479e+16	2.70012e+16	2.03333e+09	1.49234e+10
MAN2A2	-6988164497997666	4726248280203093	4450018137260967	5047181202129432	6304404117893952
HDDC3	-34575217690451	4323444375162525	82546623680411	406474669383055	1.20392e+16
RCCD1	-7427358005438341	3817687865644862	2126820260676922	3.993e+09	2.34798e+11
UROC1	-7975772789937292	-6382668637027761	5082273922685876	8216377808158664	8812026852745151
ZXDC	-2790976984563908	4340951410404007	448156995206561	3.42622e+16	7467243374573777
SLC41A3	-3.52141e+16	2584941480639798	2496444807932156	1.14104e+16	2002623093161359
CFAP100	-5.60005e+16	3.62051e+16	8630278095192256	7689311008736386	8434787699498278
MFGE8	3269673327284678	3974500461066539	2.97124e+16	8475698916800663	1575991701705248
ABHD2	-3.42909e+16	4373277505219914	8076272145208762	448486112333869	1311667766175841
FANCI	-105389851932081	3071258095639118	2416711200274341	8.83278e+08	5.8193e+10
POLG	-1.02232e+16	3.87062e+16	3.44527e+16	4.36735e+06	4.10645e+07
KIF7	-1.52914e+16	2.099e+16	2.25219e+16	6350915245326576	7413368956279088
PLIN1	-4.82761e+16	6419491924831876	970967676652629	3244389616753188	4.54814e+16
WDR93	-5043875825148645	2095598334852835	3.93107e+16	4740180004705769	9802856057247892
MESP1	-8543907280704391	6088280697879362	7809127957708161	0.000983873	0.0213296
MESP2	-1.22692e+16	3.78135e+16	3.13046e+16	2.20556e+08	1.87903e+09
ANPEP	-1.06543e+16	3.50975e+16	2.99391e+16	4.45841e+07	3.66431e+08
ENSSSCG00000001850	-7466532942961082	4900575161831036	3.88113e+16	466810	4.94801e+07
IDH2	-3.56322e+16	7270619840905991	2084003974469438	4.99282e+09	2.89276e+09
CIB1	9563321698502232	6.14279e+16	1278104472121444	2582517743162272	3.82156e+16
ETFA	3200815406741957	6.2942e+16	1108674487525434	7391587108477214	8209434451256914
TMEM266	-8856175377851233	1.07652e+16	455484746280569	3282568767792409	7202428098396203
SCAPER	-3314688325244096	5532759890797718	1.24365e+16	4210188267575592	1.63172e+16
RCN2	-461120619373706	6510787858427496	2.70618e+16	1.97051e+09	1.45012e+10
PSTPIP1	5344735008137663	1.27339e+16	3390929052772412	6555600115961646	1.28001e+16
TSPAN3	1.29149e+16	833564824740261	3891494654489504	4.85312e+16	9998033609117062
PEAK1	-1.10972e+16	2584919689809826	1.82688e+16	1.91819e+11	1.00121e+16
HMG20A	-5.00279e+16	4931579281731964	2.54575e+16	6138718524437694	7240509266643557
LINGO1	-2.55947e+16	3167531811358021	7969403490973005	0.000437118	0.00970842
SNX33	-2.3856e+16	2806743405683966	1.04757e+16	1.20956e+16	4149443729420592
SNUPN	-2480212666850469	4363111859270105	420459896932617	4.03145e+16	8568510370596304
PTPN9	-4.699e+16	380459411165134	1.21744e+16	7271505216798958	8123041170124884
ODF3L1	-8559058821721606	-611796348148034	275002882804805	599995368731086	7126262959189765
SIN3A	-3732128445637382	3.64627e+16	726380702866542	7035798802981469	1932462029791006
MAN2C1	4271459982906065	4448954238171488	1.37052e+16	7112291971621477	8005806931797086
NEIL1	-4.28147e+16	3.8662e+16	1.10513e+16	8862664303075709	3162484870880121
COMMD4	1.927e+16	3.05917e+16	8247384655024916	3.63798e+16	4955398025994969
C15orf39	-1621821507731344	2.57558e+16	3.6295e+16	5468723855638502	6682272644589123
SCAMP5	-3.35479e+16	4.5551e+16	9128051387842596	2.5172e+16	79138795919673
RPP25	-5306688328219419	4447700365143079	1742295437414245	2.99191e+11	1.50074e+16
SCAMP2	-8297426560463963	525063172442084	6304225387722128	20.2319	348.698
CPLX3	-2912437056841812	3487814760683635	1.24047e+16	8.22625e-14	3.06882e-11
ULK3	-1.734e+16	4861238728444829	3.04504e+16	8098390809837555	1520101999646594
CSK	-5141276810779734	4257626670753948	1.67867e+16	4.18262e+11	2.0404e+16
EDC3	-316517120155174	3.551e+16	3.60038e+16	5776640857679387	1.15526e+16
CLK3	-1.39418e+16	3.89353e+16	1.18184e+16	2.76982e+16	4032279068058479
ARID3B	1.95297e+16	3.74995e+16	2240339644431751	1.34451e+16	2.28078e+16
CYP1A1	-7508045599864289	1.32468e+16	2.5603e+16	1.09578e+16	1.93799e+16
UBL7	-3852083651871781	5746471771438508	1.9384e+16	6597394729219781	7608303657283568
STRA6	151086710772737	-4.96865e+16	2.39469e+16	8770200105363782	9195984596699204
PML	-5718300429871526	3.18242e+16	1.08426e+16	9919039484318396	3488870316576073
STOML1	-3.15285e+16	3.02023e+16	3084083321673109	7906180326095871	1.49003e+16
LOXL1	-8934603001549652	7554641308949754	2698184134238388	1.00463e+16	1.80887e+16
CD276	-1.91973e+16	4269404039212654	2050423521720294	1521638558589655	2.51765e+16
NPTN	2754699247248682	7368631837793309	1.85046e+16	1.69499e+11	8.92004e+10
HCN4	-8150147607286405	3.2214e+16	1.54841e+16	8.32026e+09	3.80371e+16
NEO1	-1.17755e+16	4.41993e+16	9076059719913524	3.4075e+16	4727007045190672
ENSSSCG00000001924	-1.97219e+16	5751278668858962	5681274727182491	1.71469e+16	4147164160840161
ADPGK	-1.24142e+16	4220889820882384	8754152200497369	3.4946e+16	4.81374e+16
ENSSSCG00000001927	3.87831e+16	6135092520364843	2.50223e+16	5.66706e+08	3.87125e+09
ENSSSCG00000001928	-3035641003815674	2508529834750835	1.39902e+16	2368874531620525	357165187231911
ENSSSCG00000001930	5677746762194635	1.00376e+16	861936003426642	0.000163155	0.00399996
ENSSSCG00000001931	-6121074593818806	4236624639499596	1.34813e+16	2.40954e+16	996124214866346
ENSSSCG00000001932	-1.04419e+16	258897775863251	2179355152680613	3.03619e+09	1.83352e+10
SEC23A	-4.54339e+16	4942077888277115	1.8131e+16	2.0622e+11	1.06861e+16
SSTR1	1235272429939346	1.42718e+16	2.01614e+16	7.11756e+10	4.01017e+10
MBIP	-9229061270947256	5.92111e+16	7338321059121959	3916438669407952	5239448922397427
BRMS1L	-1.20549e+16	3695810998540309	6606156057706203	4.16343e+16	5484041977533274
PSMA6	6880255834115288	69725135187567	98564302270	9920787676367908	9949652348105956
NFKBIA	-1.11962e+16	4379008990670569	5.12806e+16	800.638	11074.6
SRP54	2.61153e+16	5134759174384043	8079100580243459	7762283126287199	8491998837219745
BAZ1A	-9505429258812512	2.9108e+16	1.45999e+16	1.32919e+16	5823214952204844
CFL2	-1.449e+16	4414591551163575	1.2126e+16	27081786184143	3.96462e+16
EAPP	-983838926270061	6003556119301678	1.20251e+16	2728210751818246	3.98514e+16
EGLN3	-3.04747e+16	2.42594e+16	1.08298e+16	9987862455094956	3509355083369214
NPAS3	-9231394258892742	5139880368078568	5.48947e+16	1271.6	19124
ARHGAP5	784713225814056	7295559352161124	8584737793869976	3.54166e+16	4.8621e+16
NUBPL	-320069255441219	3060555450792342	2.6338e+16	1.04611e+16	1.86798e+16
ENSSSCG00000001970	-6579133685812724	3.03117e+16	1.38822e+16	7094548069314667	7992959971051637
HECTD1	-2794843271691073	5860922625133374	9098995621923580	2557498950272543	8027407468211123
AP4S1	-2.24801e+16	4560298791704638	4771939226998041	2892722457286015	6468094389118378
SCFD1	5511780111104763	5426942622287358	3828644563028063	5360742006819652	6582998823479637
G2E3	-7623928402111269	2.99544e+16	1.81029e+16	2.09286e+11	1.08327e+16
PRKD1	-1.40573e+16	2022403652983326	1.30817e+16	2981925934454494	1.20614e+16
STXBP6	-1027541867742449	2.33754e+16	1.28325e+16	3406464306679227	1.35029e+16
GZMH	-4251870115450105	-7548694461610537	2.8831e+16	8951348868099412	1647197285305289
SDR39U1	-5969193180562101	4302004482809705	1.64234e+16	5.0657e+11	2.41715e+16
KHNYN	-1.21192e+16	4107628401343431	1.03585e+16	3.08789e+16	4.37967e+16
CBLN3	-9486489576326712	-8754262821827126	1018616163213932	3.12847e+16	4.42542e+16
NFATC4	3867535630616309	2698402801920528	5089628034509027	2.40694e+16	5543703617896716
ADCY4	-1.53534e+16	1.8109e+16	1.64958e+16	4.87585e+11	2.33691e+16
CIDEB	2.15467e+16	3000220453871405	1.29505e+16	5.25725e-14	2.07818e-12
NOP9	4267978314348315	2.25543e+16	3016876857616129	8240201576473892	1.54085e+16
DHRS1	-3.95958e+16	5917503910237477	2.52851e+16	6150744555604049	7250398906766691
TINF2	-4.45642e+16	3.9435e+16	9962866906229516	1597291315440853	5301235474990006
IPO4	-2114869344935815	5956625852166251	5927443480324527	1.49069e+16	3677635373361778
REC8	-5043065980321977	3440459680767532	3876533630244878	4896555501520657	1.00839e+16
ENSSSCG00000002003	-5010201634048891	3.36946e+16	945095287891121	2110394336451693	6788474503311857
PSME2	-3496200903485109	6162641908602684	9820147019126512	1.72611e+16	5680623875581306
EMC9	5.56085e+16	5.80645e+16	4.64445e+16	495553756194945	62177077490338
PSME1	-6797784180272898	5443832765896083	5749999755053659	4482788718750948	5791668933108889
ENSSSCG00000002008	-6011367605100689	4242379955764653	1.68288e+16	4.09071e+11	1.99783e+16
PCK2	-6187151292966838	3.77551e+16	1.68535e+16	4.03782e+11	1975430127554225
CPNE6	-3483531695164532	4.73718e+16	3541147191575176	5517930785337521	6725234218604921
CARMIL3	2861038139196035	7632075784515199	4.54227e+16	500334461154726	6260537562074708
DHRS4	-4673074521519182	3404068897113163	7272942693065019	7000102396367036	1924190826178403
JPH4	1.63857e+16	1.26105e+16	2.64881e+16	2.65162e+08	1.90023e+10
AP1G2	-8264542351689259	1.93309e+16	8314099575587491	393385005354441	1.16957e+16
THTPA	-2664559905094154	5009226399938514	5126904783402939	2.35577e+16	544039911368936
ENSSSCG00000002020	-1.16959e+16	4625660632035522	9718430734047320	3.24221e+16	4546003985559419
PABPN1	-2004779695013175	7.76729e+16	894302465989627	7649027323638393	8405307927029801
SLC22A17	2.05332e+16	7033578067494829	6713935801257474	956623597449644	2.51563e+16
EFS	-2.38179e+16	2.07508e+16	2730914594413496	1.73389e+09	1.28698e+10
SLC7A8	1.25767e+16	6920840318736556	1.15699e+16	2820913456700194	4.08799e+16
ACIN1	-2921660286210636	6.06395e+16	9849683974150968	1.69861e+16	5598686655408738
C14orf119	-3543982586448582	4.76553e+16	7039411137404272	7907638166254498	8599163593627124
CDH24	-7467504713159481	1.67362e+16	3819276316424917	5066611698548511	1.03771e+16
MMP14	-3431805651070843	208258946726449	4558307883299274	14630	18179.4
MRPL52	4.7513e+16	6805648929692866	38579243086813	5345194123627881	6568586147645386
SLC7A7	-1710562027133929	2.66991e+16	7306004427621033	3.92689e+16	5249758418116215
OXA1L	-1813997511289819	6882102593968984	5801822343832267	1.60096e+16	3913274656330706
ENSSSCG00000002045	2.23143e+16	4.73839e+16	4388656969053753	3617880146862299	7813546184905314
DAD1	2.76275e+16	862238655500308	173203509056969	3.15787e+10	1579392084874073
ABHD4	-1050705158805159	3076376548640373	2648417141225834	2.65706e+08	1.90255e+10
CHD8	-3.93253e+16	4495894686137654	1.00846e+16	1.49516e+16	5009548618931749
RPGRIP1	-1.19444e+16	-7762106103432724	1.17885e+16	2.77591e+16	4038388248403506
OR6S1	-7600463813496134	2.10872e+16	1.53312e+16	2156452075188644	3320805174756637
RNASE10	635200660241997	-5010610552224615	1.82253e+16	8926110880961439	9300617921127524
PNP	1.09244e+16	4714409319788357	8426009659523519	3.58654e+16	4904574516061223
OSGEP	1.73085e+16	3.42752e+16	1.64691e+16	1.9938e+16	3123947373551267
TEP1	-1.56762e+16	2.58286e+16	677830764028684	4103346949479325	5427506453484724
PARP2	1.22311e+16	4097789907424758	1.11899e+16	2901350794106226	4176113323569468
CCNB1IP1	-2821069902214617	1.28477e+16	7517378866316378	3.85927e+16	51853910208378
TTC5	-4707741276095835	460531794446635	1.20699e+16	5124159855768682	1934608874352097
ENSSSCG00000002170	-2.27334e+16	1.29748e+16	2.80967e+16	5960678395483265	7097222255347432
ENSSSCG00000002190	6724501690100319	-1.3762e+16	7543972777211962	3850875877546334	5178266813568781
LPCAT4	2.31303e+16	3117982031122731	1.17165e+16	2.79061e+16	405464878739062
SLC12A6	-1.43745e+16	3.80508e+16	995969876057365	3182876488742443	4.48486e+16
KATNBL1	-295045473357546	3.76722e+16	2434349444141989	1.18703e+16	2065470447583229
ARRDC4	66812614117826	4376382415984356	2746236255213516	1.60182e+08	1.1974e+10
NR2F2	-7102611123424105	3.48043e+16	2.01041e+16	7.33396e+08	4.12535e+11
MCTP2	2.28506e+16	3.17214e+16	1.94759e+16	1.62847e+16	2.65985e+16
KLHL25	-3.29398e+16	6482579928313252	1500033395804925	6985321669015372	7912718959282283
ENSSSCG00000002259	-694109690933529	5318757662063552	2.91025e+16	6.86475e+07	5.48257e+07
SV2B	-6478101415947789	-2.54943e+16	5845371304778291	8089568151687343	8723250146676553
SLCO3A1	3.54414e+16	5093740537161664	9964049086997648	1.59627e+16	5298852995754925
FAM174B	-1.29675e+16	3.19389e+16	3.39629e+16	5.61744e+06	5.21394e+07
ENSSSCG00000002266	-1.71911e+16	6445760885353195	3955544124676064	4671721236277083	9686230433811374
AKAP5	-6999146749564273	2318000143592877	8375329434007082	380348607551564	1.13512e+16
MTHFD1	-2.92264e+16	469107827200347	6414191376977154	1.13212e+16	2.90834e+16
PPP1R36	-990400046113436	3.26639e+16	3252951011793499	5684427253251001	6870140387250375
PLEKHG3	-2.2359e+16	2.43928e+16	1.10407e+16	2933737931002232	4210773920788097
SPTB	-2.08467e+16	-6847618019414319	1483010656330178	2.23304e+16	3.41434e+16
RAB15	-2.3819e+16	2.0993e+16	3.74229e+16	950980	9.75049e+06
ENSSSCG00000002281	-3844003229796862	3.08668e+16	3.40846e+16	648630290446755	1.26935e+16
FUT8	-1.30518e+16	5062926111958427	1.05696e+16	8.59545e-10	2.61736e-07
CCDC196	-3223732454490751	7201182977981176	5750507477917637	4482588350864787	5791668933108889
GPHN	-3.00994e+16	5851274723930337	9596054147137702	1.94996e+16	6341047413290184
MPP5	-629951199945755	4343901750359277	2.18616e+16	640096686644985	7454602604450514
PLEK2	2.63415e+16	3.4547e+16	2.31669e+16	1279924322608678	2.1917e+16
PLEKHH1	-3706575911620427	1.58497e+16	1.24065e+16	2653455809510522	3903406527561783
ARG2	-9580183787462272	4328701725537868	4.32065e+16	4925.72	578302
VTI1B	3591810621913495	6065672093728701	1.11107e+16	7388872809100907	820747762727856
ENSSSCG00000002296	1.14161e+16	5168480740223653	1.25181e+16	263207204103744	3876845151787407
RDH12	-215217492222755	7122941019538984	2.59962e+16	6101463934229626	721401734969113
ZFYVE26	-5546281351340432	2.61356e+16	6974282537598879	8268936818681584	2.21848e+16
EXD2	-1143958734533365	2533796284092631	1611687646728322	5.9551e+10	2.80427e+16
ERH	5937115910886486	851440165427994	84813928117629	3.57079e+16	4888743171646635
PLEKHD1	-194451059154549	-9154154029859728	1.06612e+16	3018240689753274	430730962059267
SUSD6	-5831500366848839	5183327710444909	2.53562e+16	4.76616e+08	3.29899e+10
SLC10A1	-1.41821e+16	1941690916716292	3518874886670142	6067362246898783	1.20252e+16
SMOC1	-3.34441e+16	1.87628e+16	1.71371e+16	1905044444265325	3014923596465202
SLC8A3	7667915687012186	2952750843225738	1.53994e+16	8.70155e+10	3.96434e+16
COX16	-1855041012938632	5265623918624161	4157813883352185	4144286028063431	8757573527914815
MAP3K9	-8194698482460022	2768923066695141	9341730371878284	2.23994e+16	7151788316973189
PCNX1	-5905135346372028	4513877641656042	2.13027e+16	3.92178e+09	2.31004e+11
SIPA1L1	-8788367968118486	3211043801214549	2.10861e+16	4.39095e+09	2.56797e+10
DPF3	-1974176883299583	3596771403493453	1662431797219366	8974088248295963	9328050838874672
ZFYVE1	-4747018756557082	2.83039e+16	5289482761035899	2.14546e+16	5020636559837582
PSEN1	-2.50327e+16	4553449271228596	5691135586774924	1.70508e+16	4128281260976423
PAPLN	-4297381380338089	2348802428836897	3123093113947263	7719013229881859	1.46163e+16
RIOX1	-4404538602380989	4270695939902885	1.61785e+16	5.76435e+09	2.72337e+16
ENSSSCG00000002348	-20016102263909	332410957403601	8524037658284017	3.50486e+16	1.05772e+16
ACOT4	-1.06905e+16	5493514411527545	9959246487431868	3.18299e+16	4.48486e+16
MIDEAS	2.0119e+16	6061044061850814	4934177457715696	2633059146809645	5979296827315238
ENSSSCG00000002351	-5236135956369704	1538917417811216	2.84556e+16	9162651267487018	1.67855e+16
ZNF410	-5.08619e+16	5240084710858803	2.56916e+16	6122467606217292	7230914081625097
FAM161B	-358038697755719	4091204509022005	7471550273282405	6268155346496796	1749500524645705
ENTPD5	-8052691933963815	4999412841858418	4392788407328666	340700	406084
BBOF1	-8166932154435012	6030654401369022	2.98468e+16	8405567858219092	1.56616e+16
ALDH6A1	-8696796239542725	3.87442e+16	3216193877876651	1.41842e+08	1.24537e+09
VSX2	-1.33064e+16	1.55785e+16	2.1862e+16	6400933066236878	7454602604450514
NPC2	-2.27925e+16	6656351920364354	6.64449e+16	9946317782842116	2.59973e+16
ISCA2	9329361076250932	5317602630906044	1157766678929649	28192919352579	4087012911445025
LTBP2	2.59033e+16	5773100800947848	3371514994484377	561478063279707	6813401690224423
AREL1	1.26631e+16	3004088035875486	469084845708613	4934084838135126	6200433990904768
YLPM1	-3.41068e+16	5356503736510217	1.25761e+16	3.90714e+16	1.52559e+16
DLST	-1.98047e+16	4.87346e+16	3.9333e+16	4733900545612537	9793395259108400
RPS6KL1	3.09747e+16	2.54815e+16	2.48008e+16	1.15297e+16	2.01829e+16
EIF2B2	5.19718e+16	533496306206744	3534983073694353	5521394722729723	6728504422417222
MLH3	-2155088165613947	4147423580802446	1.97122e+16	1603186537923056	2627791749827225
ACYP1	1891392413426187	3.96223e+16	2.05623e+16	1.51585e+16	2510607728937191
ZC2HC1C	2.37989e+16	2948771925870111	141482157390449	9053179218120958	9387800821703182
NEK9	-1.28047e+16	4286874218399195	1.41068e+16	2349432334480883	3548546690454651
FOS	-1254900270410383	9679084299760882	1163916060748038	3.90129e-12	1.321e-10
ENSSSCG00000002386	432064613634882	5.05572e+16	1.09601e+16	9309458548836152	3.29937e+16
GPATCH2L	1.382e+16	3.26126e+16	7210015244578987	3958155873719644	5280838293927822
ESRRB	-8046095384831768	-269841015215851	4877415241784075	4849364921473818	6128826312356183
VASH1	-3.56113e+16	3.30036e+16	3.3176e+16	6854186756993699	1325835115115448
ANGEL1	-1.37147e+16	3.0077e+16	5360123936203491	4.6409e+16	5942490151665915
GSTZ1	-5050093357033787	5739734715720639	2147378937648874	643078967089776	7477647894617556
POMT2	5613611584861103	5147421552698363	3270958556259913	5673741782413176	6861278390393706
TMEM63C	1.79524e+16	2726819156685135	8563575534449539	3.5476e+16	4.8669e+16
NGB	3208501035163763	2274192176951866	2014985172822332	1.55753e+16	2.56733e+16
ENSSSCG00000002400	2.2583e+16	4380886021510104	5210302248340961	2.24534e+16	5.22599e+16
VIPAS39	-4.55834e+16	5314579729182293	1.39149e+16	1.91276e+16	8105835521953765
SPTLC2	-9452017733977276	3.37603e+16	3.64254e+16	5461528731645924	6675847353894857
ENSSSCG00000002405	-596061143988319	1.57417e+16	3.63594e+16	565447538442092	1.13597e+16
AHSA1	-1477893436408522	6767727938859589	3.01822e+16	82333617301859	1.5399e+16
ADCK1	2335853737058602	2.55414e+16	8584080534135117	3.54185e+16	4.8621e+16
CEP128	-7071907936726486	1.88511e+16	3.793e+16	5146719277999718	1.05062e+16
GTF2A1	-2.21262e+16	4484205372349111	2.38387e+16	1225934065613508	2.11756e+16
STON2	-3.86582e+16	4820535315148879	1.33596e+16	2.57103e+16	1057811642596388
SEL1L	-1.24418e+16	4330349680560037	7357862703260416	3910140385266477	5233460397613399
KCNK10	-1.15364e+16	-2009158052214831	1.61104e+16	2.04346e+16	3.18063e+16
SPATA7	-2.14148e+16	4445149935314589	3421266996996586	8532551759033039	9038075690918472
PTPN21	-7289345650750135	2.21542e+16	6311247077836868	1.19974e+16	3.0543e+16
ZC3H14	-3.08817e+16	6266505788311885	1.49877e+16	1.08212e+16	4.83569e+16
EML5	-2.14619e+16	4300206786128874	32215387462929	7267528353630974	1.3905e+16
TTC8	3.5289e+16	4844883103953159	1.54589e+16	8.4317e+10	3850565728384762
FOXN3	-7726842348664236	4848100840980105	4326213652235472	478759	562852
EFCAB11	-4428729418811891	3.14068e+16	4.07744e+16	4345953044407617	9114443991283192
TDP1	-6623946801654185	2.12276e+16	6411707666934209	1.1337e+16	2911978665740423
PSMC1	1.17594e+16	5665153652930027	1317929534606801	2.50964e+16	3.73682e+16
NRDE2	-1.98099e+16	3.60881e+16	1053846828532179	3.04623e+16	4.33863e+16
TTC7B	-6896528853845857	4056941929152478	2.0069e+16	7.46977e+09	4.1908e+11
CCDC88C	-1.62026e+16	8803940685851774	915665084042767	2.47816e+16	7809661295800177
PPP4R3A	-3525240443898538	5364225099644642	1.05706e+16	1.14902e+16	3970207545056478
TC2N	6394004047054258	3.04201e+16	1.25206e+16	4024844356741118	1.56587e+16
TRIP11	-6122614687966013	5596499495430684	2.63837e+16	2.79898e+08	1.99919e+10
ENSSSCG00000002446	-5474076963536488	3.67715e+16	719275643676625	7319845185481699	2.0006e+16
CPSF2	-1.53549e+16	4898289026017242	1.74753e+16	1861877208049212	2.96165e+16
ENSSSCG00000002449	2.1155e+16	839134555077648	1.16001e+16	6594677649913349	2.42722e+16
RIN3	-7898051053024056	658438748392119	2.52925e+16	1.11753e+16	1.96859e+16
LGMN	1.60548e+16	5504062077462212	3619075348321522	5.71206e+16	1145269597531877
GOLGA5	-3166959373063612	384216781662216	5362519178592205	2.0574e+16	4847484019640774
CHGA	2.85049e+16	1.25411e+16	1.19126e+16	5575576050541768	2082684291961148
ITPK1	769688164711623	4.8547e+16	5525856845427604	4.57263e+16	5877343292369455
TMEM251	-2534390776257203	4745481176973722	3467546086225971	625840891025503	1.23371e+16
ENSSSCG00000002459	110284159762	6863781056151493	37613055	9998452575877668	10
ENSSSCG00000002460	-2815306869075819	3.90864e+16	4572914019817006	3248126912052155	7139586220928432
BTBD7	-3.62423e+16	4921381062045694	1.16274e+16	6498645801708238	2.39376e+16
ASB2	-8982378283502889	1919729009977999	6.12862e+16	1.33011e+16	3.33304e+16
OTUB2	-834768680936075	1.90305e+16	8647157841718746	3.27572e+16	9978265246733716
DDX24	9941005461857516	6346459324591339	1.65791e+16	1.97886e+16	3105035628286724
PPP4R4	-4842713874715616	2036797116268626	3.75782e+16	5256097145249163	1.06877e+16
SERPINA6	199525008158482	2854352790026929	1.1249e+16	796677992755138	2874344819998912
SERPINA1	3.88419e+16	6510077199878198	5673262799492713	2.14252e-111	8.02747e-108
SERPINA5	4.18495e+16	-392243551156619	1.09127e+16	7411402884826854	8224023224310509
ENSSSCG00000002483	-6719120341688517	-7554533422807747	2284228963893887	6326957007066099	7392680987663226
CLMN	1.54776e+16	8607806570162022	246030133869846	7.04415e+08	4.7258e+09
SYNE3	3.00719e+16	464593024455048	7313892916210594	6842353861987017	1.88775e+16
GLRX5	-1.49568e+16	6831069139934658	3994021456736812	4566195949792688	9500046740062408
TCL1B	6245604577491083	1.05573e+16	1.03786e+16	3083186926242216	4375718599619944
ENSSSCG00000002498	-2468594431488693	1.57603e+16	3358748161965458	6.81298e+06	6.24916e+07
AK7	8102964354585919	1110818413084994	7603558344499583	5825322207677447	1642660802508521
PAPOLA	4.98859e+16	743946020394819	4.22887e+16	5154997641398307	639458646534474
VRK1	-4.64801e+16	3183403575460005	646605858968618	1.09954e+16	2.83564e+16
BCL11B	-441891445976979	8813836592309259	2.80989e+16	1.1527e+09	8.84541e+08
SETD3	-6468410802578736	4797314310596413	4731051763379488	4915621000431424	6185535283417911
CCNK	-4.85467e+16	4667160523113029	1.49755e+16	1.08913e+16	486092811778809
CYP46A1	2731841884208231	6989681301983426	2213872240583612	6379849500680398	7439057313052342
DEGS2	-2.08324e+16	3.27754e+16	86853870992389	0.000116843	0.000289754
WARS1	2.02292e+16	3.7785e+16	1.43369e+16	2311624258661671	3.50588e+16
WDR25	-1.61047e+16	3228818814804943	786666812636116	3751099149359038	5073627749070246
SLC25A29	-2009516156703163	3.89531e+16	1317998553847018	1.6549e-14	6.67969e-14
CDC42BPB	1941083250205662	4.06999e+16	1.42736e+16	2321952401737347	3.51681e+16
AMN	7193887698360521	6726450973858189	2.77164e+16	0	0
TRAF3	1.72225e+16	3712881107817366	1.6072e+16	2.04886e+16	3.18796e+16
RCOR1	-389094820079876	4.68123e+16	1.23557e+16	4.39654e+16	1.69715e+16
ENSSSCG00000002528	1.43703e+16	3.46418e+16	8126275713262565	3.67345e+16	4.99305e+16
CINP	2735867207871311	6.40974e+16	1.10827e+16	8713611892182283	3.11188e+16
MOK	1422428707862263	4015280824883571	1.43735e+16	2.30569e+16	3.49911e+16
ENSSSCG00000002532	859303013184183	3.04032e+16	2397484316755949	6243878697100917	7321625346614119
WDR20	-6706634482787119	4526249954638959	3083032501482421	5787232499316997	695606054297569
HSP90AA1	2.56425e+16	9465353491642684	8414707094148277	3.72198e+16	1.11446e+16
ENSSSCG00000002536	2.42654e+16	1.99169e+16	2.00159e+16	7.67997e+08	4.29754e+09
PPP2R5C	-1.4984e+16	5695712977848667	2.59972e+16	1068827047611501	1899096305730332
PPP1R13B	-5945020219655565	2942430967694387	9582032087412956	1964908079444129	6378826662124612
XRCC3	-5169418903298827	1.82254e+16	2.56841e+16	1.09017e+16	1.92966e+16
ENSSSCG00000002547	-9805916608767756	6317861495737815	1.47694e+16	2.24253e+16	3.4246e+16
JAG2	1.62964e+16	8846576732520525	2.44463e+16	7.64109e+08	5.07688e+09
NUDT14	4210021598428146	6601962848356783	2311308571028663	6306865798764811	7377414961430129
CEP170B	-3.60498e+16	4280229068546449	9874751821362556	1.67562e+16	5.5335e+16
CDCA4	-772532462133899	4724780326993957	3747892212884337	924062	9.50819e+06
EFHC1	-1478506819352902	4540700598717172	7.23284e+16	9322247325922472	9559643759283264
TMEM14A	-3.92408e+16	5889763579807126	1.59123e+16	6.63455e+10	3093788452176724
GSTA1	-3919115017164664	1237072339859944	1098659394728383	2.9456e+16	4223937272643027
GSTA4	4.62225e+16	6.91569e+16	2924715280642811	5886410528918278	7032599852066167
CILK1	-7751189870868423	3942787092056054	3032365403081941	3.6564e+08	3.03263e+08
FBXO9	1451008121225699	5812487227784081	2.72487e+16	9879642210161406	1.78355e+16
GAS8	1.22632e+16	3.61657e+16	8966686466474503	3.43677e+16	4.75688e+16
SPIRE2	-3.32481e+16	4313675745485228	7290390784996397	6932439497718227	1.90803e+16
ENSSSCG00000002637	3.63602e+16	4881593096908362	8085727195858638	4461522506100956	1.30595e+16
ENSSSCG00000002639	-1.85209e+16	3.93509e+16	8603798429830435	0.000176512	4.32129e-05
DEF8	-674200174678003	5070770356594936	5617260037700971	4535656442182485	584245431846152
GALNS	4554671555550588	5.03529e+16	2.70867e+16	1.9453e+09	1.43493e+10
TRAPPC2L	3.74617e+16	7717377450325044	3244245952524895	1.22774e+08	1.08514e+09
CBFA2T3	8409676603627658	1.0446e+16	6523577109238416	1.06454e+16	2762730253406327
APRT	3.03311e+16	7015127137774028	1.42085e+16	1636322577734972	7043461445370191
ENSSSCG00000002651	5.78418e+16	1.59507e+16	2.69199e+16	8696738348923311	9145105884300992
KLHDC4	2022405583527648	4066623641691112	2.7188e+16	8690321903005063	9140031610318684
ENSSSCG00000002653	9102918545007648	2285547052817389	2765815623584205	1.4476e+08	1.08902e+10
FBXO31	5560753347616494	3988232360547526	1.71757e+16	3.4076e+09	1.69056e+16
MAP1LC3B	671867514096542	7376591444531773	6844640857054207	4080537576258448	540403143743771
ZCCHC14	-2.38484e+16	4388419182739547	4360343914913513	3.67849e+16	7925832954459801
MTHFSD	7773340279541123	3.25175e+16	2582955081257561	6112935890422806	7222259364073012
GSE1	-3092535458555115	572632616404376	1.1007e+16	9076850548885564	3.22955e+16
KIAA0513	-2.80636e+16	5083409314043469	6714150591485504	9565083857552036	2.51563e+16
ZDHHC7	-1.57132e+16	3.10464e+16	6908651381046731	4.0587e+16	5382973544099257
CIBAR2	-100383317358611	3986933899908035	2516371197418028	5.26639e+08	3.6133e+10
USP10	-7333122011038604	4653940816378022	5396163670944651	4.62592e+16	5927709279538852
ATP2C2	-2.2849e+16	3383243182795713	1.04245e+16	1.78778e-08	5.33087e-08
MEAK7	-4.80502e+16	4448018913338571	1.25637e+16	3933190844148856	1.53387e+16
DNAAF1	8298416231984312	1.20974e+16	5.66873e+16	1.727e+16	4170567318426688
TAF1C	-2.96054e+16	2.9752e+16	2.97492e+16	8630604848820637	9097209624452552
HSDL1	-5957850753811504	3908739175264327	1.43227e+16	1539980143713633	6658694876293142
MBTPS1	6692033429832586	4.46403e+16	3284033610354342	9543010518698888	9708623238874644
CDH13	-1.49106e+16	1.82058e+16	2653372884969194	6064768494567185	7183443406217128
PLCG2	2.24409e+16	2.2488e+16	9201460691156048	3374366222110116	4690096922424827
CMIP	3566924026891242	6679105088119989	1975087733891502	8.82212e+09	4.89061e+10
GAN	-2.57168e+16	1.7121e+16	1002350910986749	9202510607658542	9485393835476046
VAT1L	1.19041e+16	3095509118897266	3254742219208291	5683362617540265	6869538867613891
NUDT7	-174331165568685	5123780717358322	1.98423e+16	1589458350297321	2.60873e+16
ENSSSCG00000002700	-3176724164847142	3653246156998257	4.66122e+16	3.08512e+16	6837970106037145
MON1B	-7845774344301871	4164101799210419	2.91716e+16	6.62442e+07	5.29554e+07
TERF2IP	1.36123e+16	7.83414e+16	3363978720238947	8544751342555199	9045872088104452
KARS1	-1.13476e+16	7875524916293894	2.57779e+16	8724438839311148	916361163968113
ADAT1	-5428311273607707	3.43612e+16	9694709325112928	1.84799e+16	6041381183295431
GABARAPL2	3364597642944107	8392755791100706	2.20122e+16	6389466572103674	7446240879721875
ENSSSCG00000002709	-8834922078763938	9116327027547116	2993873289867829	8358003342407445	1.55932e+16
LDHD	-1794256927848282	4.37377e+16	1.58487e+16	2.42269e-22	1.22809e-18
WDR59	-3.86358e+16	2586334192079002	3.80347e+16	5.11466e+16	1.04581e+16
RFWD3	-84015555362655	1.67697e+16	7636004216198928	5721452230429353	1.61867e+16
FA2H	-785226142019042	1.1462e+16	5056448614453514	2.45345e+16	5634263674809812
EXOSC6	-4320221904309742	3538294097809796	4116862743231541	4.24577e+16	8933900758241463
ENSSSCG00000002722	-2541829880217995	4332917258944475	3492891293906619	6163285357571202	1.21873e+16
AARS1	-1.53873e+16	4518582375897617	1.77287e+16	1.83027e+16	2922436465009062
PDPR	-5193917547173642	3.30338e+16	9014672630186476	2678208538678196	8356068820441475
ENSSSCG00000002729	-1.43583e+16	3241280521406257	6436440077268291	4223943214236497	5543262110512908
MARVELD3	-1.75904e+16	1.31151e+16	1692004816332158	3.89876e+11	1.9133e+16
TAT	-4518108273556364	1.85033e+16	2.23327e+16	1.35068e+16	2.28785e+16
CHST4	-8262342082637611	8667434256346827	3.97349e+16	4622184300022619	9600306870437436
ZNF23	-1.76335e+16	21413906243805	5652344975736412	9400698430246226	9613780184257622
PHLPP2	-5967333074393684	2032678135641311	4788384961560463	2865228014887846	642285563812072
AP1G1	-2.27576e+16	5158794056034988	5.27817e+16	2.15944e+16	5048564522569234
ZNF821	-287882040087821	4121858244982987	5005019724109577	2.52739e+16	5.78097e+16
IST1	-2.41265e+16	6451370377013573	7795447282480521	523780427127909	1.50056e+16
DHODH	-1.8063e+16	3.68826e+16	1.1831e+16	2.76726e+16	4030330142313132
DHX38	-1.34999e+16	275485897780195	4674353614844047	4.94169e+16	6206828092542855
ENSSSCG00000002749	-5290298561351638	1.78818e+16	3859991232594001	4945058676617052	1.01692e+16
ZFHX3	2830925707915513	5871443039486714	7977737021159379	4735610227893791	1.37358e+16
NOB1	7604092455966495	4771928298653391	3.6312e+16	9519490351618158	9690414990853404
NQO1	-9537046217640646	298821105146031	1.58419e+16	6906158420505293	7848838798378419
NFAT5	-6588246049525783	5581755393403201	389251853852685	4.40362e+06	4.68497e+07
ENSSSCG00000002759	5.36917e+16	4829058692333652	2.02025e+16	6530916500943429	7555399778074909
ENSSSCG00000002761	-1.87294e+16	3867148155341092	1.34689e+16	2.45823e+16	3677099520911906
TERF2	-2808423803811187	4102980582023403	4981626023796288	2561789426720007	5844908759533932
PRMT7	2.07229e+16	4903169073647216	3252648178622378	713081625330105	1369812952804766
SMPD3	-9301764211737768	1.91299e+16	1.03292e+16	1.30944e+16	4452183965844053
TSNAXIP1	1.56902e+16	2.39882e+16	4.50895e+16	5019101182188331	6276173481361322
CENPT	-1.53767e+16	1.21547e+16	1.9105e+16	6620440081872632	7625771937486553
THAP11	-4018326046698299	4498112457689688	774599361977608	5.38318e+16	1.53735e+16
RIPOR1	-5425856602436852	3752208790365043	9179210091527600	761911114408289	8385936558418072
ATP6V0D1	4501556521860316	7330613301731392	4052039119131111	1.94575e+06	2.1552e+06
HSD11B2	4.87513e+16	4215791437265429	1.0834e+16	2979370995203029	4262780931622464
LRRC36	3994785001708308	720517589192794	1.00433e+16	9201727239371888	9485153646565460
ELMO3	-1.47691e+16	2.44574e+16	3354143644581347	6.97618e+06	6.39205e+07
E2F4	-6.10093e+16	3952877011960137	21910018131776	6397263919553363	74533119484555
TMEM208	2437353478663989	6435471527150911	1.04195e+16	1.24695e+16	4261586190151644
CDH11	-8658735312636691	3.5994e+16	1.83095e+16	1.76016e+16	2.83328e+16
CNOT1	-6884107415003402	5.08392e+16	4.10997e+16	5214639592202439	6448681796018255
GINS3	-1.49204e+16	5271109551187577	5429199918985475	1.98027e+16	468971159882009
CCDC113	3.83812e+16	2.28337e+16	3.97912e+16	460675803979875	9574035308806396
CSNK2A2	-1312514563932622	4064259599430683	7464377000532956	3876064250048975	5201180889878082
CFAP20	-3731230952589259	609502404412837	1.2054e+16	5168208496924326	1.94996e+16
MMP15	7008893666889958	4.12469e+16	2.88711e+16	7.73593e+07	6.1188e+08
USB1	-2.22594e+16	3.81866e+16	266892290400628	1.02325e+16	1.83591e+16
ZNF319	-1.14248e+16	2038538020838112	2089437624614181	6475965346268088	7511078213131241
TEPP	1.4119e+16	-4.3502e+16	2864311025348578	9056448239603632	1.66299e+16
ENSSSCG00000002811	5511693080879879	1.5052e+16	4.24186e+16	2.99492e-78	6.45219e-77
KIFC3	-9330037175297468	2.18866e+16	1.39678e+16	1.85972e+16	7906333830372935
KATNB1	-2166747592886164	4.52271e+16	270706695984169	9990452292853848	1.80016e+16
ADGRG3	-2883287926638192	-1.0607e+16	1.77094e+16	1.83265e+16	2924766288209058
ADGRG1	7008609556774111	4991545374593464	3651190676639282	1.51737e+07	1.51429e+08
PLLP	-1.25101e+16	2.38521e+16	1604097762048895	6.19863e+10	2908613285629596
ARL2BP	2.69234e+16	4958800068142243	71528450429239	7484516640499799	2038812143180244
RSPRY1	-2.10218e+16	3.91287e+16	2288710824131051	1.30318e+16	222423539194981
AMFR	-3877737145212886	4874010914424752	1350144010766969	2383804408081477	986905332051027
MMP2	-4953474682250595	2.3098e+16	1.17085e+16	6221506969977153	22985567551459
TOX3	-7429829503026485	5.24594e+16	2.94983e+16	5.59647e+06	4.52416e+09
ZNF423	2779972797083548	169715824602957	8034045742726957	0.00031515	0.000708163
C16orf78	-1.07377e+16	1.45133e+16	9606959247220814	7565982555368433	8345722375382042
N4BP1	-4749720534177807	4938731220674684	1.94433e+16	1.03632e+11	5.68822e+11
PHKB	-3.09643e+16	5734944432650513	1.31332e+16	2901030916975245	1.17645e+16
DNAJA2	-1.75257e+16	5297516940679485	2.54416e+16	1.10702e+16	1.95367e+16
GPT2	-9479086098940688	2786849857121197	1.48543e+16	1.16144e+16	5145864977630949
SHCBP1	-2.7554e+16	-2.34254e+16	1.37759e+16	7105187726931852	8000124810457337
POP4	-2.15349e+16	3.85782e+16	2.65105e+16	1034815859248064	1851069157668955
CCNE1	1.28497e+16	2915410318946852	4.65508e+16	4.95061e+16	6214858715389954
ENSSSCG00000002857	-1107656883007887	1.42929e+16	1.17151e+16	7321454325967469	8158354257971768
ANKRD27	-1649273281091658	4594500309847342	1.63149e+16	2.01498e+16	314680448611001
PDCD5	4213379509839017	6760858855944934	3525336509352071	2.89481e+07	2.79508e+08
LRP3	-2.60284e+16	2867774955802042	1.67378e+16	8970612994902002	9327426944906808
GPATCH1	-4326180042998867	3.8508e+16	9240272151215756	2367497642909892	7511749240712811
CEBPA	2.8467e+16	3579737755505657	5118756766186472	2.47812e-97	7.90934e-96
CEBPG	-1870709159249555	3711840259752171	1.57473e+16	2.09521e+16	3.24243e+16
PEPD	5055694595373624	6304276987399575	236992254542874	1.12628e+10	7.28657e+09
LSM14A	-3151676071842581	6512038648765195	1.58472e+16	6.86687e+10	3191759788058175
GARRE1	-3138685789910918	2.39613e+16	2101583747152116	6466432998591921	7502800551834784
GPI	9873631849616842	6962053753730779	1.33094e+16	8.62324e-16	3.53861e-13
ENSSSCG00000002875	-1999995865927163	3657422494937787	2533625269648887	8735320588598958	9171128797788928
ENSSSCG00000002877	-7665781507874516	3.37925e+16	1.9055e+16	1.27007e+11	6.85339e+10
GRAMD1A	-2.253e+16	3974042784902574	2.78808e+16	949677048845468	1.7271e+16
LSR	-7856865725095344	5861020969371867	6062836996460943	4.36191e+16	5677040714983234
USF2	1378623113425402	5986047681354993	3.09569e+16	7850005580674851	1.48203e+16
MAG	-2.33312e+16	1.8209e+16	3033351937178103	3.63785e+07	3.0187e+09
ENSSSCG00000002891	1.22317e+16	7068807281472092	1.8574e+16	1.72925e+16	2.79266e+16
KMT2B	-3.52072e+16	3.69608e+16	4838023602364277	2.78388e+16	6266180310835695
LIN37	3929377844278582	4853321612863842	1.70865e+16	6793441463142271	7757567323743262
HAUS5	-5718407531009919	2480110190327755	7153770843570211	7480654278226178	2.0384e+16
RBM42	-1.4808e+16	6180670311277743	2.83993e+16	9194801158437080	1.68321e+16
ETV2	-2.67341e+16	4630815868528657	3.76169e+16	5243945315998945	1.06668e+16
ENSSSCG00000002907	2.2309e+16	8847681471810764	1.41134e+16	1.72115e+16	7373620102300478
ALKBH6	-4754239319598404	4964553874031561	1.53386e+16	8.98619e+10	4.08323e+16
ENSSSCG00000002913	1.43742e+16	623345109484476	1909243979367501	1.99783e-27	1.23858e-25
APLP1	-6313277236383177	713706102469983	4.14458e+16	5197156327528158	6434378945833475
NFKBID	-1397962804862541	1935146448224019	3.29851e+16	5657468324113415	6848807091809701
ENSSSCG00000002918	-1.0018e+16	2371262804554375	1.43178e+16	7051419882642016	7960908009782205
CLIP3	1.22603e+16	5067850613273947	1.67544e+16	1.95532e+16	3076681841353667
WDR62	-907086312327096	8975910440647472	2.20871e+16	1372330684972543	2.31611e+16
TBCB	-8182405517620586	5958337968119732	8829224975699264	3.47402e+16	4.79142e+16
LRFN3	-3.69621e+16	3.15698e+16	439982757327283	3594256439416884	7770573222949072
ZNF260	-792364347646204	4951004682409418	3463201365352886	3.98302e+06	3.76769e+07
ZNF565	-852512444975989	1.58787e+16	6848015472918451	887397893931704	2.35769e+16
ZNF567	-5771659969207923	3113954119205775	7714437507179472	547809260517457	1.56187e+16
ZNF382	-7118586424705566	2.41698e+16	7602931259253885	5.82735e+16	1642963394682839
ENSSSCG00000002935	-7230958344922797	5618841315546051	6177472353838649	3.85086	65.0682
ENSSSCG00000002937	-6545239116944392	464659796005802	2.79404e+16	1.25107e+09	9.51974e+07
ENSSSCG00000002941	-2640444146356554	-1.15128e+16	1.21722e+16	2699072198220959	3955918029240896
ENSSSCG00000002950	-6078104447662466	4495986318653279	2436297355316968	7.97876e+07	5.28087e+10
YIF1B	1216462053436747	4792968949720867	1230503132182914	9116734055945552	9432126196790300
ENSSSCG00000002953	2542332648127614	6.15541e+16	1.06129e+16	1.12302e+16	3.89442e+16
SPINT2	-3410167734507751	8848305329078984	1.3843e+16	7098464607318442	7995567951421041
CATSPERG	-1.49326e+16	5447904147633886	2.83291e+16	9235102034214696	1.68877e+16
GGN	-797662539715646	2.00753e+16	6.58979e+16	1.02565e+16	2671473303644032
FAM98C	-1.04792e+16	5366000222904225	1.40112e+16	2365367924540403	3.5673e+16
MAP4K1	-5993327897015178	3.65902e+16	1.03966e+16	1.2625e+16	4308757568762196
ENSSSCG00000002963	2346822026916849	893799095236057	1.39177e+16	1.90996e+16	8095963160260599
ACTN4	-4.0997e+16	5920657824563885	1.63495e+16	5.26698e+10	250763502732409
ENSSSCG00000002972	1.68312e+16	7046332651318659	2916809438790739	2.13943e-49	2.31906e-47
SPMI	1.55076e+16	2943168607826624	5860952395013186	808707296662123	8723250146676553
AWN	7294768744776626	-4.37651e+16	2.28389e+16	6327208427561373	7392680987663226
DLL3	-3246011760210724	3891618972368792	4851869834053771	2.76162e+16	6232353774930212
ZNF546	-4.93712e+16	2708591515800656	5464290596923688	1940893160190123	4613335211126296
AKT2	-4.30968e+16	4.63621e+16	1.40056e+16	1.8227e+16	7764262716284744
CCNP	-6169079689414204	3.73035e+16	1758150753620674	2.75252e+11	1.39119e+16
TTC9B	-8425180459350249	2.2856e+16	840299970027073	3746023571832883	1120685927105359
CYP2F1	1333756682427448	-1.89126e+16	249441612761375	1.14251e+16	2.00378e+16
ENSSSCG00000002996	-9338238294373056	3.265e+16	3447613235594136	5570937046662657	6775942131208955
SNRPA	-5.08781e+16	4598669731963746	2.14574e+16	6432061116579192	7478182227755152
ITPKC	-5907045407930287	2.27448e+16	5965331114233983	1.45899e+16	3612358087423263
B9D2	-2784910635911675	5410389098431201	7.36301e+16	6657915552213548	1.84544e+16
EXOSC5	4252506506364271	2.56699e+16	5736111859249018	1.66195e+16	4038886479225756
CCDC97	-1.58169e+16	3970525169150409	1.35502e+16	2.44402e+16	3659639923641236
TGFB1	2209851471490475	1356931130029217	1711871310374782	3.51146e+11	1.73858e+16
LIPE	-1.03789e+16	1.68344e+16	9209696017597008	2.40737e+16	7615815708929921
MEGF8	-7457876163695473	3.78641e+16	2858961093157042	5928624828159411	706865391770021
TMEM145	-6253900878635711	3259500103290816	12762521720566	3536338200513394	1.39631e+16
PRR19	-1347323077050354	1646085416432685	1120227145917663	8169726559831537	2.94018e+16
CIC	-4051144628134673	3.67509e+16	8270748856616386	4028888537212664	1.19453e+16
GSK3A	-1.84401e+16	3.96112e+16	1.83308e+16	1757640516698924	2830057390256535
GRIK5	4.79759e+16	3317824113167106	6550115898765671	1.04877e+16	2726335946533672
ENSSSCG00000003042	2.39834e+16	6340875303144318	7179092946933723	7375798752931875	2013652645442434
ENSSSCG00000003045	-2.3773e+16	5285928859394033	2.61507e+16	6090864146113363	7205439189941919
ENSSSCG00000003046	2019738194939575	8779113622777446	825656269688697	4060493837487542	1.20307e+16
ERFL	1.65739e+16	1.03543e+16	2.15588e+16	6424220812553213	7472595377225797
CD177	7094829599576049	5599549217187786	3.03816e+16	9860933270210072	9908544776178108
ZNF575	-2.89337e+16	3.99184e+16	4925506697150178	2.6463e+16	6002770566662325
XRCC1	-4.20493e+16	4222023853044356	1.27143e+16	3.62864e+16	1.42882e+16
ZNF428	-5.16926e+16	6693520657152786	406538729193767	5237315583985218	6469227699418422
CADM4	-1.06239e+16	3.06071e+16	1.72827e+16	3.22114e+11	1.60665e+16
LYPD3	-1.94333e+16	-8153443264054566	5062742764666681	4.76756e+16	6057868148302402
PHLDB3	-2705894815892283	1.48116e+16	6.87669e+16	8732707912228613	2.32445e+16
ETHE1	-1.62079e+16	5453666039566599	3.4849e+16	6.1931e+16	1.22378e+16
SMG9	-4144882476615401	3775565123812339	8540911208615395	3.47252e+16	1.04961e+16
ZNF45	-7758593147591564	2739373654807383	1.38277e+16	2.00363e+16	8441099762564126
ZNF404	-3.97296e+16	2.552e+16	3882589398831114	4878925505231611	1.005e+16
ZNF283	-3349946369934135	4903894072511072	9131534779308624	2512408659185923	7903150801436281
ENSSSCG00000003076	6332230521411901	3.74815e+16	1412294431312331	7070618257545965	797370317796275
ENSSSCG00000003077	-4907919971834041	1.99892e+16	3.42334e+16	6428086067774655	1.26067e+16
CEACAM19	-1.03219e+16	1.37164e+16	8048447226697037	4554267321186648	1.32971e+16
ENSSSCG00000003079	-8566157844052171	3273028158373835	1824321614067462	1.94417e+11	1.01281e+16
ENSSSCG00000003080	-5659568746941207	7342645647622358	1.70855e+16	1.91173e+16	3023395035103802
CBLC	-7703879338564479	1195531802127513	4346220672203723	3709116937153504	7974879043393293
CLPTM1	-6.74314e+16	5860195459399423	6.70445e+16	9347415806591856	9575767440954032
ENSSSCG00000003086	-1395763137899572	1200535770099202	4.63199e+16	3138109731864136	6936683497329535
APOE	-9957351399916632	3.04601e+16	1557100298856291	6931372999465331	7870748033060019
TOMM40	-1.9734e+16	484497058698234	3932165604792903	8428127858558008	8962165821955038
ENSSSCG00000003090	-1.8289e+16	5128870470383722	2.08186e+16	3.41654e-31	2.36482e-29
IRF2BP1	-7538067090213751	4461160066768583	4173758455351271	5182493590744959	642176123635699
FOXA3	2311701923698049	4.36746e+16	3690540091465147	5.47219e+16	1.10463e+16
SYMPK	-1.01289e+16	3.5647e+16	333356597565051	5636892545095836	6832536958627663
NANOS2	-8963612758681486	-2886779498623044	7401752097923486	3.89605e+16	5220273655725435
PPP5C	1.33406e+16	5590939311914366	23320027065866	8786277930349147	9206121960579218
CCDC61	-2717492376482679	4840529927221139	5264588668498327	8185215758963231	8789544772942759
HIF3A	-1.31686e+16	3.53337e+16	5.49807e+16	1217.18	18321.6
ENSSSCG00000003102	-3.57524e+16	4050975103864701	4838756437349467	2.7827e+16	6266180310835695
FKRP	2.88314e+16	3.96154e+16	4960601436903822	8237502614526842	8823233458107135
STRN4	-2.12762e+16	4441820859328978	2976533114706923	8448005037086996	1.57203e+16
SLC1A5	-2.13392e+16	2.22678e+16	6086593559868065	4.35293e+16	5668940175496237
AP2S1	1.26525e+16	7398766921690579	3.29686e+16	6941249145193117	1339518855866122
ARHGAP35	-3777777594169811	5216377128651649	1.11274e+16	8505985066347321	3047482025036679
NPAS1	-2.94108e+16	-6724632960285077	2758715682517108	9672586050852364	1.75149e+16
TMEM160	-1.80982e+16	5828246749169005	2.95267e+16	857355768563172	1.59086e+16
ZC3H4	-5026080406531547	4569962301849187	1615802095604731	5.82713e+10	2.74851e+16
SAE1	-2.57633e+16	5275726029013225	6135539964166712	132491080411251	3322082745984405
ENSSSCG00000003112	4491777918847765	1359895040132821	1.05846e+16	3035675590131328	4326816804160887
DHX34	-4.99733e+16	2.31438e+16	3523507241650865	6050428605683217	1.20013e+16
MEIS3	5253529627018722	4165681378219526	1.30056e+16	3105632000847061	1246229744693809
ZNF541	-1235368385070967	2.50037e+16	2454114467686955	7.27399e+08	4.86034e+09
NAPA	2.53322e+16	5826329292570643	8131550695099019	4350152553345986	1.27813e+16
KPTN	2509132995571874	5956160789324709	3509249810097348	5535899872500848	6742366921245998
ELSPBP1	2067102432633602	4.09072e+16	1836143958212002	6682853109973595	7674505153944224
CABP5	-8401153239323692	-3.74074e+16	863966391834774	3526311002878374	4.84684e+16
LIG1	-4489218781754627	2.70781e+16	3476667861191042	622399491388813	1.22875e+16
ZSWIM9	-7788097420541104	2161381699274586	9424212466929508	2.14139e+16	6868949156650375
ENSSSCG00000003132	-1.01775e+16	7504290871840748	2.22831e+16	1.35502e+16	2.29296e+16
GRWD1	-8749977499789408	3.62136e+16	4.23993e+16	5149514988548812	6390545134478598
CYTH2	-6085396968101822	7042277930452366	5926277034110238	137.962	2232.65
PLEKHA4	-1034088531612865	1.1726e+16	5454650200054763	1.95163e+16	4635661824055507
BCAT2	-3.30915e+16	5079044125100787	8907378962944422	2.84021e+16	8797799230473044
FGF21	-1.79418e+16	9050904859159368	1.24843e+16	4103872167083958	1594459801616141
MAMSTR	-3.70805e+16	4241756057643993	8690677557592338	3198417048014779	9770421450289740
DHDH	-7329365292595281	5925116759487184	5.76356e+16	31.5456	499.255
FUT2	-338817011431629	3624507226999569	5390784655762912	2.02434e+16	4779375523730489
CA11	-9173457938014112	3.93859e+16	1.81634e+16	2.02737e+11	1.05183e+16
DBP	-1.90211e+16	3.34686e+16	4142722085797679	1.22342e+06	1.37905e+07
TULP2	-2484441187354114	8117304567301324	1.59833e+16	2.0614e+16	3202756960045283
NUCB1	-1.14071e+16	2.05541e+16	1413401168127663	1.70238e+16	7304077308466226
RUVBL2	-4485230849966312	5250083983915602	2.06309e+16	6496762502001304	7527216679472236
FTL	-7326256053639344	655035409614197	4838325867571111	3505.48	46084.6
GYS1	-4.40955e+16	3962291366358296	740112909423793	6518295140708903	1810229080730228
PPP1R15A	-1.53027e+16	5085339991310594	6475446276996641	0.0848373	149.506
LIN7B	-5391665672205544	539012325396002	3.09229e+16	2.68486e+07	2.26609e+07
NTF4	-1.74912e+16	-1.34283e+16	68577839064492	793418810228286	8618247428174519
PRRG2	-6828366606812292	4849020926392818	3261177261778141	1.12531e+08	9.98185e+06
ENSSSCG00000003165	2606078828681749	1.14745e+16	2.23395e+16	2.28459e+09	1.40524e+11
ALDH16A1	-933791943540467	4280407372352438	4032387361807443	215164	2.3741e+06
PIH1D1	-5275585281926064	4509386825455389	2067950999821555	5.42939e+09	3.12335e+10
SLC17A7	-681124435956086	1.23664e+16	4029623485215208	2.18229e+06	2.40638e+06
KASH5	-3302726127380648	1.61056e+16	1.03809e+16	1.27329e+16	4342124407339791
BCL2L12	-3.18157e+16	2315779457683492	6893137281061692	1.0195	1.9099
IRF3	-5629042489525596	5897840870714012	3.58227e+16	2.1611e+06	2.11388e+08
RRAS	-3.51944e+16	1.66586e+16	1.57074e+16	2.101e+16	3.24982e+16
FCGRT	-3424740170716554	7315625731453277	2021210222241296	6.9313e+08	3.91676e+11
PRMT1	9715072608579084	3452104024580557	5039569216308104	4.77767e+16	6066682234046121
IL4I1	-3.80788e+16	4285802285895776	8016783159642621	4634581815697624	1.34973e+16
TBC1D17	-2.78792e+16	4041866432667893	5.69217e+16	1.70408e+16	4127126572493742
AKT1S1	-7787321063896896	4192208165779858	4336239937812678	5102160465102996	634944612949892
PNKP	-353853393703206	4137669783661508	7356547428008897	6681897634894549	1850594660732887
PTOV1	-3.03425e+16	8031810306999855	1.9408e+16	1.05565e+11	5.77959e+10
MED25	-3575575804715146	6452651866962547	1.99005e+16	8.15788e+09	4.54431e+11
FUZ	-5740008152516027	5039064596179157	3.17145e+16	1.78586e+08	1.54515e+09
AP2A1	-2.45278e+16	5448794699195514	6713377416264015	9569231770482532	2.51603e+16
ATF5	2723187705938243	2.74916e+16	1750699806640243	1857887811106283	2.95694e+16
VRK3	-4310000829651155	4249051366271202	1.26895e+16	3.67711e+16	1.44593e+16
IZUMO2	-5547249446161252	1.55763e+16	2.30247e+16	1291681905589535	2208545401074964
NR1H2	-5331766528216453	4653033082968006	2.17588e+16	3.0917e+10	1.86443e+10
NAPSA	-5103932920102786	2534405977966097	1.03335e+16	2.83068e-09	8.33963e-08
KCNC3	-2.73721e+16	3.01705e+16	7511130704862171	0.00444911	0.0915041
POLD1	-2.00964e+16	2.42444e+16	8373422805025053	3.60158e+16	4919808924549513
ASPDH	-2822504746770721	6.30856e+16	1.2706e+16	3644802443946685	1.43486e+16
MYBPC2	-1.4096e+16	1.20173e+16	9801823596097676	1.74339e+16	5729845506372573
FAM71E1	2.3988e+16	2.56256e+16	1.64266e+16	1.99961e+16	3129614636990343
SYT3	-1.87528e+16	2.90695e+16	6383277622749279	4.24317e+16	5559181520360483
ENSSSCG00000003225	1.14e+16	5276539154104746	1.73371e+16	1.35809e-24	7.59959e-23
VSIG10L	-1.6582e+16	8532329288765352	1060704341776108	1.12658e+16	3.90361e+16
ENSSSCG00000003230	1496264174039408	2.19548e+16	2113986724521837	6456733407943694	7497038990035716
ZNF175	-8879579496114216	2.5414e+16	1.44883e+16	1.41034e+16	6152180761473102
ENSSSCG00000003234	-1.14951e+16	2410305772963778	1591525784929982	6.62425e+10	3090015787682938
ENSSSCG00000003235	-1114432764846525	2.14883e+16	1.23538e+16	4400960475403062	1.6984e+16
ENSSSCG00000003236	-1.34513e+16	-5708992759199888	1.30525e+16	2532563884046881	3.76185e+16
SPACA6	-2.84164e+16	3.35278e+16	1.7231e+16	1892941887380265	2999710686741345
HAS1	-1.33935e+16	4853559542260064	1.66095e+16	1974747185592748	3100553716508306
ENSSSCG00000003240	-5762115855842154	3.08828e+16	9009168165574554	2686286522867727	8378238910898528
ZNF614	-3419078740002609	1543680641373997	1.35705e+16	2.44049e+16	3.65564e+16
NLRP12	2.53994e+16	-5391226746982127	1194471127604535	7296349155552541	8140379187982136
ENSSSCG00000003253	1.99649e+16	3704777768642324	227841116965004	1.76266e-36	1.3502e-34
PRKCG	1.73051e+16	1.87773e+16	5949838798331129	122.394	1986.31
CACNG6	7865103465426289	1.75718e+16	6502677168368722	1.07712e+16	2.78867e+16
OSCAR	-1.03732e+16	-367327358296752	7247218232043995	932157567169492	9559643759283264
ENSSSCG00000003261	2.36616e+16	812129803286146	1.55103e+16	8.20559e+10	3.75726e+16
TFPT	-1.67658e+16	4557403278700309	1.84753e+16	1.74071e+16	2.80725e+16
PRPF31	-1.56102e+16	5421140599681303	2.78524e+16	9513671032998596	1.72845e+16
CNOT3	-2926122161992227	4724025761545874	8007324514224761	4658851952322262	1.35634e+16
LENG1	-4.46028e+16	4754463577994531	1.26813e+16	3.69329e+16	1.45163e+16
TMC4	8547276732971032	405903960721626	5532401544896723	4569967828152545	5876111274112886
MBOAT7	-3944306455487408	4519298538859572	1280364994736918	3.45944e+16	1.36971e+16
TSEN34	-6461192269009061	5862471731077424	4400910000518609	32685.3	390930
LENG9	-8883343339607788	40298887041769	4431185672445874	505621083716874	6311566146056582
ENSSSCG00000003278	-1.28857e+16	2.38709e+16	3244382437823825	5689525516453413	6872650145505648
HSPBP1	3.73186e+16	495092780836202	1.48631e+16	1155995479847769	5125696448463159
ISOC2	1820889878649976	2.05082e+16	1.11747e+16	7381643621373346	8202845424371834
PPP6R1	-4254707562668303	2645600457333817	3.09792e+16	7839255133393498	1.48091e+16
ENSSSCG00000003302	2.67521e+16	2725696095496456	3976248256946897	2.86802e+06	3.13246e+06
HELZ2	-4.27348e+16	-4.43412e+16	1.95973e+16	6579913350384708	7594149365416446
ZNF787	-6004717704669605	3263427249938636	8159793371567257	4282925061822906	1.25988e+16
GALP	-7382210541164651	6516641409485978	2683523203425222	2.21561e+09	1.61123e+10
ENSSSCG00000003322	-1934714640953565	2.68262e+16	1.00525e+16	3160426536012692	4.46256e+16
ZNF471	-1.06872e+16	184650453827046	1.22538e+16	4.64312e+16	1.77752e+16
PEG3	253871634713579	6037425219554584	6607184221843484	1015681401088683	2.6483e+16
ACAP3	2197500829294021	3.96211e+16	2941425685094588	8633450055411865	1.60032e+16
SDF4	9943555466001596	6827193567387815	1.61214e+16	2.04192e+16	317907937272726
UBE2J2	-8551336761492617	3.89148e+16	349715615011783	3.34556e+06	3.20872e+07
ENSSSCG00000003336	-7265792089839169	1.97428e+16	7024511928235046	8040138288028199	2168572510080845
PUSL1	-5428845735357998	3.69582e+16	1504004714350078	6981529468925	7908943104832546
INTS11	8026948543818535	4810986177565731	5200966844451154	4.708e+16	600388133125009
TAS1R3	-1.07748e+16	3.53527e+16	5806487670355183	4.46058e+16	5769464912563805
DVL1	-3282155838322714	4018445517256085	6240434804005142	1.24866e+16	3.16089e+16
ATAD3A	-1.43174e+16	2925257070371581	7052188559160939	4.01036e+16	5337146487008512
ENSSSCG00000003348	-3.35151e+16	4880332056206066	8718883076530409	3149309212546784	9639201612190342
MIB2	-424097328790373	4781372716923973	1.92169e+16	9650342587736932	9779717439856884
ENSSSCG00000003352	1.03555e+16	3.76047e+16	6848770702532141	4.07912e+16	5403404503725086
SLC35E2B	6.56295e+16	396007098515353	2.72953e+16	9583335729796222	9735133321818152
CCNL2	2.33272e+16	5096486273524726	5.79035e+16	8098407947596772	8728413543670213
TPRG1L	3.24737e+16	5538033831477398	1.3425e+16	248291531481757	1.02376e+16
WRAP73	9086158901906152	4380731278073331	5075342183766249	4.76208e+16	6052244515201327
CEP104	1.17103e+16	2.96663e+16	4.87326e+16	4851223678316685	6129432692191631
RNF207	4012705395712621	1.33791e+16	1.63962e+16	2.00377e+16	3.1347e+16
RPL22	3844243789351646	1.08118e+16	3810795703314169	669366	7.01308e+06
GPR153	3.89681e+16	8568100469878059	8833715367237473	5.51969e-06	0.0013949
ESPN	3070145464594129	4897284440844174	7893947730021634	1.09106e-158	7.23245e-156
PLEKHG5	-7655272553145621	3330059789751359	1684479455026559	4.05644e+11	1.98334e+16
ACOT7	1.18235e+16	4110394546098652	5414141319664103	186.567	27553.5
KLHL21	-1.26446e+16	2088641539546858	255811029375673	6130127513940213	7235002924245674
TAS1R1	-6995958470777881	1.40667e+16	1110963298527337	2918726446617142	4192370223139132
ZBTB48	-1.14221e+16	3.01858e+16	5110057988519845	4747037773313461	6039358974168266
DNAJC11	-1.23631e+16	4323677526702363	6857192749037395	4076242417533005	5400833184669537
PARK7	2.07638e+16	9019404246765128	1.18845e+16	5660290117309178	2110211987277172
TNFRSF9	-1422175445110996	2590157632581185	2932637156018683	6.11577e+07	4.92548e+08
TMEM201	-1421343886702691	2421041513624386	2.76606e+16	1.44578e+09	1.08812e+10
PIK3CD	-3823357660152626	1.8022e+16	2135051503352334	1.43966e+16	2405475109662665
CLSTN1	-3.26145e+16	6.07134e+16	1.39703e+16	1.85721e+16	789760574954855
UBE4B	-9472801760929100	4.67738e+16	5019346907756645	4.78651e+16	6073887932118447
RBP7	7166205135751836	5367575510194	3.29602e+16	0	0
NMNAT1	3.52131e+16	2.77725e+16	3266185233754328	7072189945094856	1.36083e+16
KIF1B	-500415267177681	4829727871586336	1909865648337035	1.24132e+11	6.70244e+10
PGD	-3552668196631035	445334906006408	7433397066312175	6402436635570089	1.78207e+16
CENPS	-1.08249e+16	423702212465169	5757475473033562	4.47984e+16	5788727004372902
DFFA	-1.45616e+16	4566919575473258	1.28499e+16	2.56973e+16	3806886019145371
PEX14	-1.44988e+16	4720340739623568	1749269231699536	1.85969e+16	2959256703729975
CASZ1	-1.11022e+16	3.84625e+16	4561695484167686	143792	1.78806e+06
MASP2	3.41863e+16	2.23875e+16	1.46849e+16	2255840528475231	3.43974e+16
EXOSC10	-1.46753e+16	3.59339e+16	1.24154e+16	9112797851164262	9430711598703978
MTOR	-7476533908565608	3.38506e+16	1.61672e+16	6876218123354119	7826355134893278
ANGPTL7	1.68689e+16	3.5922e+16	1258597046751575	9716996163498892	9820126004333492
DISP3	1.4399e+16	3.5292e+16	9871518439903086	3.20439e+16	4505812636455382
MAD2L2	-3031681859245429	5681929297291187	9032287682038548	2652523223168144	8292442907909117
ENSSSCG00000003421	-3.98545e+16	5.22102e+16	1.38213e+16	2.01039e+16	8467521051648397
DRAXIN	-1.5567e+16	1.40016e+16	1301177943406035	3095376624882394	1.24327e+16
MTHFR	-3960720138604836	4426787362096648	1.05622e+16	1.15425e+16	3982889046008158
CLCN6	-2.48152e+16	3.20276e+16	1.54344e+16	9011290543952284	9358254550796434
NPPB	-1.94981e+16	-1.2374e+16	1.96598e+16	1.60875e+16	2.63513e+16
KIAA2013	-2.24847e+16	4453116456223967	3.68754e+16	5.48203e+16	1.10636e+16
PLOD1	6923282779006976	556635866475052	6680368702152899	0.299937	5.43576
MFN2	-9719446641512164	3575737992545642	4973239569940533	4806783180863401	6091089487698016
MIIP	-2170530703356037	3.65272e+16	2.46979e+16	1.16054e+16	2029201704708035
VPS13D	-1.65322e+16	3868719779029298	1.40875e+16	2.35264e+16	3.55215e+16
FHAD1	-2.04901e+16	4698241553600249	2.32071e+16	127661520035438	218668882708286
CTRC	-4359439214358318	225257100439435	253815213710946	1.11125e+16	1959119692587151
CELA2A	-1.09267e+16	5788905267436594	6413645250773836	8000736732966499	8664356075774043
CASP9	9261514724026644	3.46946e+16	3007755333021235	8286697175778945	1.5482e+16
RSC1A1	-3.54939e+16	3.81199e+16	5927874107112199	1.49032e+16	3677263126552727
AGMAT	8420100399750474	2978084868818469	1305122082082461	3030867822439622	1.22278e+16
DNAJC16	-2.16288e+16	279749389249212	1.30012e+16	2541906189964972	3.77118e+16
FBLIM1	-1.24999e+16	3.74644e+16	5.10767e+16	888.243	12217.8
PLEKHM2	-2.00564e+16	3929186852585488	2.37221e+16	1.23512e+16	2.12915e+16
FAM131C	5191064837035	5805566972451101	3388954238342624	5.83314e+06	5.40506e+07
ARHGEF19	-1.91741e+16	2619952743377188	4.76559e+16	5079.82	65532
CPLANE2	-1181365918797887	3.5426e+16	3.01295e+16	4.04128e+08	3.3342e+08
SPATA21	-1.67855e+16	5.79044e+16	1.72569e+16	1.88962e+16	2996599394361189
NECAP2	2.37847e+16	529260318292049	5028398760932151	2.49349e+16	5.71709e+16
CROCC	-6822351714629026	228261597672793	7575452178256485	5916853483776237	1.66439e+16
MFAP2	-1.16011e+16	5146157513013342	8115106399523127	0.00209106	0.00472959
PADI1	-9074239660533940	-6231254985070304	3257717422030084	5681595111117999	686788411699528
RCC2	1.71367e+16	3497445622845993	8660637344585513	3.52047e+16	4840880922485723
ARHGEF10L	1.73086e+16	5.57732e+16	3717217863547715	5.3854e+16	1.08991e+16
UBR4	-1.0752e+16	4.81453e+16	8784462082873077	3486276038202355	480533969277172
EMC1	-5428496815303261	4349957681812075	1983455036876629	6560596351165118	7578951448934445
AKR7A2	271467938180023	60530017328015	1.15575e+16	6747682857449153	2.4765e+16
SLC66A1	3.80819e+16	4323440791208337	7970928095053509	7776917713284438	8502612077420533
CAPZB	-1.38063e+16	7.29061e+16	3.76436e+16	5235601553775288	1.06523e+16
PLA2G2A	-3222243854653389	-2.86017e+16	2257732316132488	1.32949e+16	2.26093e+16
UBXN10	-5581148346171785	2.75107e+16	3.86855e+16	4919892695968951	1012228131968782
DDOST	3608556623000486	7924927360073902	2099038736374705	4.61594e+09	2.69224e+11
PINK1	-8516590722620552	522823809428783	5303476927372613	3276.96	47222.8
KIF17	2.31658e+16	1.70494e+16	7724314846185338	3.79466e+16	5118695686631667
SH2D5	-8832614014319727	1.74682e+16	1554471300710838	2.12477e+16	3.27963e+16
HP1BP3	-3.02666e+16	6723955393199005	1.38891e+16	1.93915e+16	8201549797308479
EIF4G3	-1147185095721234	6421550227017038	1.96229e+16	1.61269e+16	2.64026e+16
ECE1	9543014154632962	4830125462483185	9905250021224212	3.19614e+16	4.49677e+16
HSPG2	-9080819021754498	193305436964535	81821153227084	4230539869613504	1.24723e+16
CDC42	-1.43246e+16	7828662848635272	4.75637e+16	2.91901e+16	6517573690727686
ENSSSCG00000003521	1022267594034263	1.53317e+16	1.14802e+16	7034030578314258	2.57064e+16
C1QA	148240477864117	1.38908e+16	2.7759e+16	5982849569369959	7114562998699505
EPHB2	-8868042782602559	3494761038069287	2.80197e+16	1.20084e+08	9.17804e+08
LACTBL1	-1.17235e+16	-7811381762203253	4.32598e+16	5107167520025667	6353087853312333
KDM1A	-5826361434172576	5150073637950833	3.12636e+16	2.25261e+08	1.91533e+09
LUZP1	-1952278907726684	3777343187359937	5291614244993782	348.097	5003.71
GRHL3	-1.76369e+16	1640770371894001	1980150044034115	8.59152e+09	4.77199e+11
STPG1	5389122547271049	-3496000133435884	4.80153e+16	944756343897468	9644539232999384
NIPAL3	-5687078001378492	4277663490439053	2236051425266083	2.25972e+09	1.39044e+11
NCMAP	-151514811579078	3675643732930677	5454115059172089	1522.27	22656.5
LDLRAP1	-1.43275e+16	5668573283325613	2.39809e+16	1.21483e+16	2102806649832276
PAQR7	-7946541554256586	3316657423627488	2008015808219828	7.42632e+09	4.17186e+10
MTFR1L	-1.94556e+16	5245465021983649	2.63028e+16	1.04843e+16	1870707658349178
ENSSSCG00000003554	-6938775393287862	3.79791e+16	1.84748e+16	1.72163e+11	9.05473e+10
RPS6KA1	-1.04546e+16	1.97468e+16	9466847890853212	2.09219e+16	6734930929390262
ARID1A	-3.41666e+16	6587528114885482	1.56659e+16	7.55765e+09	3489696646100638
ZDHHC18	-2972759953829264	2.03954e+16	1451057031030631	2.28358e+16	3474362063559066
GPATCH3	-2.44143e+16	3988694333519515	3.13312e+16	7671659389468659	1454897112428393
NR0B2	1.17594e+16	4470619430935208	6.09767e+16	8049587903792063	8698097023313868
NUDC	2029423688332633	6901596388939965	5486162508655644	1.91676e+16	4562257491645057
KDF1	-2.3808e+16	4.98952e+16	5884001495926632	152790593114823	3.75924e+16
SLC9A1	-4019647997839579	2.00553e+16	2.17224e+16	1.40521e+16	2.3601e+16
WDTC1	-6545873454830815	4101391824816322	1.2963e+16	3.17704e+16	1.26956e+16
SYTL1	-1.49981e+16	3.25635e+16	4.98926e+16	16239.8	219180
CD164L2	-8960922218885898	2.36963e+16	1.05649e+16	1.15256e+16	3980028796916558
WASF2	-2.83597e+16	5701089004853223	9816370609562844	1.72965e+16	5691213112075078
FGR	-4726560127581012	-4595187669904056	6487826678012434	1.08616e+16	2.80889e+16
EYA3	-1.83821e+16	4175935957100204	2408347503070207	1.2069e+16	2092642974529921
RPA2	-4817385568324098	4931474824338676	1299582839423563	3121857056875532	1.25099e+16
THEMIS2	-8782253100001359	4.51506e+16	3.20874e+16	7324568739604059	1.39923e+16
EPB41	-1.96706e+16	5453984117579959	2610252429268981	1.02574e-43	9.6605e-42
SRSF4	-3812153810952003	707023709518971	2.16505e+16	3.27131e+10	1.96108e+11
PTPRU	-1.56288e+16	8463385882285899	8660399260271468	3.252e+16	9916529678304216
PUM1	-6721126898146124	5520025711057705	2.35524e+16	1.21556e+10	7.79976e+09
SDC3	-1.65542e+16	2.64899e+16	3.97198e+16	29313.8	3.19559e+06
SNRNP40	-1.98069e+16	5757201624463832	3.65559e+16	5588132112332505	1.12421e+16
TINAGL1	-1.82022e+16	2.04059e+16	3227067150254808	1.34123e+08	1.1812e+09
COL16A1	8661175626444539	3762271226143319	3.20955e+16	1.46776e+08	1.28475e+08
ADGRB2	5579779600071998	2169845678675535	6149817460331658	1.31426e+16	32995212593445
IQCC	-2971423587401996	3.38324e+16	3193397652704042	739361928362746	1.41008e+16
EIF3I	5277414971005039	7032662877462201	3620918785732105	1.77233e+07	1.75856e+08
HDAC1	-3720848884694366	6.20565e+16	170730792804158	3.59686e+11	1.7778e+16
TXLNA	-2.1528e+16	4143489319224099	2.74632e+16	9747836886154362	1762525899421637
AZIN2	-5033823600202604	2528405358555554	4698179838078493	3.01946e+16	6716617924013636
TRIM62	-6483687290874101	2088136907130429	5490239671313583	1.91229e+16	4.55352e+16
ENSSSCG00000003621	-4012548364554093	1.95899e+16	1.47052e+16	2252640370826567	3.43608e+16
ENSSSCG00000003622	-3.41528e+16	8115481607432103	2251947373204589	2.08024e+10	1.28967e+11
ZMYM4	-4037015861752853	4560802287193735	1.317e+16	2.84462e+16	1.15603e+16
CLSPN	-4.65481e+16	220195224428625	3.00865e+16	8282121459016029	154751044390873
AGO1	-2895746770925121	647417104536148	1.03671e+16	128277776069268	4372760028785273
ENSSSCG00000003632	2.48742e+16	1.70673e+16	95814444967273	3276548255347786	4582966172773827
ADPRS	-5166962296247932	4736196486811022	2225076738497795	2.39263e+09	1.46746e+11
MAP7D1	-5192161498158037	4014973218510956	1286350721241148	3350520607103185	1.3312e+16
GRIK3	4657105546552775	1.9909e+16	1.81012e+16	2.9135e-26	1.70797e-23
INPP5B	-2.8534e+16	3.48179e+16	3.78606e+16	5.16811e+16	1.05436e+16
SF3A3	-1.25864e+16	558040183464	1.49167e+16	2.21958e+16	3.39943e+16
FHL3	-1.07268e+16	2.43684e+16	1702726645941587	3.68469e+10	1.81808e+16
UTP11	3935082181770105	5866840038377207	1748605022400378	6758277642884486	7733657871744591
RRAGC	1.56338e+16	6673390960518619	2.91959e+16	8750999933162099	1.61793e+16
AKIRIN1	1.81621e+16	6871479764277518	5852108240884624	8088488854645859	8723250146676553
NDUFS5	9802893939012336	8551104146183647	2539463113980627	1.11033e+16	1957742055475226
MACF1	-292811702578942	6678250383070458	1.58639e+16	6.80633e+10	3.16618e+16
PABPC4	-3795684930778223	3.38331e+16	4874865367166731	2.72506e+16	6159521507282952
HPCAL1	-1.41719e+16	3741006838218399	6501377666431989	0.743763	131.474
ENSSSCG00000003664	-7479573689498499	4723281340682923	3869666973565691	5338981592663827	6562823461205411
TRIT1	-6989276458193259	4809536819854738	3627506987447861	1.71342e+07	1.70108e+08
RLF	-5883928687685537	443338950834276	252437614984118	5.05227e+08	3.48164e+10
CAP1	-6.02795e+16	6398944807043635	4.26305e+16	5138075787539553	6380024221775519
CEP192	-3.27355e+16	5208577424691195	1.0404e+16	747034852079716	8272042800765389
PPP4R1	34984772841669	3.5655e+16	5309386692817686	8177645944421212	8784152561676509
RALBP1	-2452326942199948	5.84311e+16	5818249627015814	1586072124613755	3.88405e+16
ANKRD12	-4.61219e+16	6.84555e+16	2874145681681322	8.2714e+07	6.52437e+08
MTCL1	-2.67567e+16	2254403036058942	1.19474e+16	2.74376e+16	4003349967571826
EPB41L3	1.50005e+16	5421502740966438	2104929564835052	1.46825e+16	2.44213e+16
DLGAP1	8334896485192496	1.08336e+16	9937552754066968	3.18826e+16	4.4911e+16
MYL12A	2174011506846535	810985411603484	8807503371706595	2.99994e+16	923285871012314
MYOM1	-7075112258490313	3.26746e+16	7108597952230307	3991585284180897	531563687010182
EMILIN2	-1.67344e+16	1.68881e+16	3.22461e+16	5701325285711435	6883526535848447
GREB1L	-5890664915907043	2.15068e+16	4653254501148948	3099473029131847	6860957829063369
ESCO1	-3.18412e+16	440565657036252	6076215378508059	1.37014e+16	3422371380393023
SNRPD1	-1.25702e+16	7343984921547497	2.43007e+16	1.19028e+16	2.06986e+16
GATA6	-3.4527e+16	3.95544e+16	2.11134e+16	7.76913e-33	5.48775e-31
ENSSSCG00000003704	-3835774832226262	6903373356352073	87435546982	9925393314149676	9951789269957340
CABLES1	-2.41875e+16	1.76533e+16	8100466742665136	3681064517934591	5000476247213302
NPC1	-2.71886e+16	2.13921e+16	1.26792e+16	2.60158e+16	3.84099e+16
ANKRD29	9627007575391916	3.2997e+16	2.95938e+16	5.3276e+07	4.32303e+08
LAMA3	4159875393307917	1671833907267747	3.76294e+16	5395935491378061	6616316746862613
TTC39C	-9583474403899620	1.15565e+16	6392865011076498	800390962922736	8666125295874706
CABYR	-5265592612679967	3822049122169877	1628089890593155	5.46117e+10	2.59079e+16
OSBPL1A	-522931849974452	5925209467092288	3535477687195612	274794	2.65773e+08
HRH4	393337255772141	4552238796770404	1.23845e+16	9719269826925344	9821272013781560
ZNF521	-3376599513293686	2.04668e+16	5431374124920895	1709.03	25305
SS18	-2.49696e+16	5289944757121445	6402351790617204	1.13969e+16	2.92344e+16
ENSSSCG00000003719	-4159265387118102	2.87746e+16	4798763944736928	2848016288929482	6392181369930933
CHST9	7308965158413812	7133851698150242	1.0729e+16	3.8452e-09	1.19409e-07
CDH2	-7472247226511314	-3871918880400704	2412001157019894	9608299379980920	9751148509344512
TRAPPC8	1.04831e+16	3927060667871739	7460881098780909	3.87718e+16	520226756853976
RNF138	1011052259208329	5624470014799639	808157622753658	9283685983349884	9533714349224528
GAREM1	-111366907085185	2467999455583497	1.6358e+16	5.24347e+10	2497996381022127
MEP1B	-4.97405e+16	-9489355019109472	6821979377869591	7939466128067978	8621806988674412
KLHL14	8195164524355059	2.12684e+16	1.38089e+16	2.02375e+16	8513373672282336
ASXL3	-9462354825829736	1.10546e+16	5499647593321068	1.90203e+16	4532839890026626
NOL4	-7299199550258618	6924965368380453	701396472099894	0.552513	1.05924
MAPRE2	-1.02969e+16	6872487670361437	1.70927e+16	8959818798045194	931921109643679
ZSCAN30	-2.04931e+16	3.28507e+16	9853279367032606	3208869548148211	4.51063e+16
ENSSSCG00000003741	-8054671517833083	4.85641e+16	38930196670968	5326665459958673	6550019920261682
GALNT1	-4323190982556854	6077760069245151	2.37184e+16	1.1151e+09	7.21966e+08
MOCOS	3.51244e+16	3468744181894885	4452196599849696	5046138472839904	6303710356307755
KIAA1328	-3.32112e+16	4305250154230888	7583162789399756	5891597822174801	1658094194402069
CELF4	700846929754659	5570860901382225	3584520053092932	2.13634e+06	2.09203e+08
PIK3C3	7235275842213051	4477437529711033	5.14322e+16	741.145	103013
SSX2IP	-2.87253e+16	4616778421026994	7355998743083887	6683937069433686	1.85073e+16
CTBS	-7324120344834387	2117044927243663	7019299920542755	8063575194025919	2.17421e+16
TTLL7	4.56364e+16	3777905262740907	9677198936172164	1865688439411697	6093450872325297
ADGRL2	-3492377531302604	2.9699e+16	2.8123e+16	9354440766930284	1.70679e+16
DNAJB4	7528754284454246	5210503104905031	267990936944166	6046826636976335	7165491764651454
NEXN	-2.11174e+16	2705698620610431	1142672990908368	2.85088e+16	4119874635462323
MIGA1	8933129013751333	5172719835025076	8957824759503441	3439151072662835	4759798340748732
FUBP1	5540555978838904	6581008800467073	5508792169580219	4579586689670293	588233541485076
ZZZ3	-5585298211287739	4742107126345201	1.82751e+16	1.91193e+11	9.98245e+10
AK5	8866369157997442	1.14893e+16	7379825083192859	7858847408592764	8569355629956744
MSH4	3472380020480173	1.79167e+16	2.0279e+16	1.54434e+16	2549244976192786
ACADM	-666565646487397	4228664468568888	1899050850269937	1.3137e+11	7.06448e+09
TYW3	-146645500618347	4471522719844302	1656319892746069	1.98101e+16	3106988502769697
CRYZ	7072034829285275	5880001245110021	6.1889e+16	3.63373	61.6411
ENSSSCG00000003781	594669947828732	323670335872328	1.19525e+16	5457295070940785	2045150696839844
LRRIQ3	-2.59419e+16	2574094084933582	1.09807e+16	294690691646729	4.22545e+16
ZRANB2	3938752325629069	4873566511056292	709346146688895	7736567723523167	209818638418445
PTGER3	-1.1008e+16	68499676146697	3.37176e+16	6.37209e+07	5.86035e+07
CTH	-6628439639235482	4190969822537577	1.15717e+16	6696236672539199	2.45971e+16
ANKRD13C	-6003938003068901	4804580280917373	3.70128e+16	5429345172889516	6646879106034296
SRSF11	-1.36528e+16	6667096889055981	3130398743136391	7684494277026371	1456611590219682
ENSSSCG00000003792	-4.49557e+16	3.32851e+16	6671318481125814	9797668071887968	2.56982e+16
LRRC7	8103061775030387	2.41536e+16	1410974883112043	1.72448e+16	7386024473439953
WLS	-4721662940500228	5866219071061008	2.33895e+16	1.32302e+10	8.43589e+09
DIRAS3	6238696723168244	1.00473e+16	3267803538700957	1.08759e+08	9.67716e+07
SERBP1	-3844385701126788	8611832431898364	349894748870351	5541727162237035	6748510396464021
IL12RB2	6043456833207157	2127397095863621	7188684513049513	3.96515e+16	5287382351092023
ENSSSCG00000003803	-4.85597e+16	5923886374168414	3278445595669499	5669310543924969	6858608326061066
PDE4B	2357151238361252	1.23795e+16	8394798509995914	5.07965e-05	0.0120756
LEPROT	-1.01377e+16	5802812159299215	1591275368111794	2071440139091782	321459308457112
DNAJC6	2249226099643729	4986706962889233	4331082662542414	3.74224e+16	803908355990176
JAK1	1.04454e+16	7555494153029735	1.71621e+16	1.90181e+16	3.01072e+16
ROR1	-1.18193e+16	5754784749136261	7783880194798112	3.77635e+16	5099931230713678
PGM1	-3.09252e+16	8456352614310974	5236072217920835	4693069869475121	5990501678278515
EFCAB7	-8884946008191716	4421672545054069	5779288874708115	4471252778737199	5779797618055623
ALG6	-4.77771e+16	4490179485693012	1.23556e+16	4396734767334964	1.69715e+16
ATG4C	-802968625998406	3.63666e+16	2.83919e+16	594144101239301	7079207455830868
DOCK7	-494530161216075	4082494606140617	1.72544e+16	6778602973034128	7748323533641278
ANGPTL3	-7434709169744592	2.31004e+16	1096453528360323	2950457260352173	4.22914e+16
USP1	-6225632541444308	5.53312e+16	3867088066956184	501637	5.31064e+06
KANK4	-1362903473124601	-486179300749562	2.63627e+16	6076395057236349	7193753868077241
CYP2J34	-7818115604585729	5241284835612647	5439465587043744	4.60802e+16	5912244349136403
FGGY	-1.03573e+16	4186520133526491	7382700350275941	3.90216e+16	5225208661420215
MYSM1	-7373728790463405	4120530402458277	2.70491e+16	1.98357e+09	1.4591e+10
OMA1	-3.486e+16	2594458426774611	2.06102e+16	1511089275241709	2504435393671589
TACSTD2	-1.68188e+16	6334641919388478	7260496046066578	7048781897145882	1.93518e+16
DAB1	1.50757e+16	2.13518e+16	2584815184949025	3.69358e+09	2.59514e+10
ENSSSCG00000003839	3.42497e+16	1376484169818716	7079760712020268	0.0395817	0.764787
PARS2	-5293805338859681	3302330221723099	5691007162883055	170520651563047	4128281260976423
TTC4	-2682065495294923	3.95045e+16	2.23221e+16	1.3516e+16	22887498847994
ENSSSCG00000003847	1.19066e+16	2.11529e+16	2.89115e+16	590788128475845	7051408167784757
LRP8	-9960672689746968	3.03717e+16	2240669817778732	2.20603e+09	1.36174e+11
MAGOH	7801621200837899	6743842994423679	9175125416502894	923689841681076	9507760643438452
CZIB	-1.63556e+16	7047541910267072	4438411707741101	3513892331402241	7621688186725098
CPT2	-1.54473e+16	2.62144e+16	5524867511650502	457303385477075	587742270596375
ECHDC2	2.83939e+16	618709883797092	1.23873e+16	4322646216962178	1.6708e+16
ZYG11B	-3307531088208336	3858377963572366	4692980698642732	3.02861e+16	6733671559755716
TUT4	-1.43315e+16	6146333732720764	2.78866e+16	94933824411011	1.72703e+16
ORC1	1.62483e+16	3.3605e+16	981585838384846	1730135071872643	5691711770132659
CC2D1B	-4258424099083051	4305213408179193	8619057535995282	3.32664e+16	1010301801890317
ZFYVE9	-2.29524e+16	4478760977622749	4023701803835992	4486513627454102	9365923252079876
TXNDC12	-2.62722e+16	5928859167358325	9079302373502736	2.58519e+16	8103981298897835
ENSSSCG00000003868	-4.52678e+16	3503421789264577	9064621428870864	2.60602e+16	8166334186614591
NRDC	-4317715318292441	487775381380627	1.35745e+16	2.29274e+16	9533272314170776
EPS15	-6739751336722823	3907965698386627	2.26429e+16	1.95081e+09	1.21687e+11
TTC39A	-6411939331768157	3.79493e+16	1.70469e+16	3.64686e+08	1800965718191629
CDKN2C	1.80329e+16	3.05405e+16	3.10171e+16	5775754555403004	6945170568783282
FAF1	-1.04092e+16	4564443976793509	7524841637132491	3.85691e+16	5184356657481729
SPATA6	190498402576322	3.9122e+16	173848224894218	1.87331e+16	2.97682e+16
CMPK1	4.07648e+16	7596195265367974	4072726822484892	175028	1.94997e+06
STIL	-632615629796209	2055242151866332	6074075888404117	1371800486016601	3.42586e+16
EFCAB14	4561409513026154	4.02246e+16	1.43249e+16	1.53815e+16	6652450781225851
MOB3C	2438639460561138	2636143790848436	1.63294e+16	2012973579087379	3.14473e+16
MKNK1	-2599527260236959	5263268605114649	4213788060534629	8373571706299806	8920113008101684
FAAH	5616557538414031	4387985301744639	1.73278e+16	3.1455e+11	1.57412e+16
ENSSSCG00000003903	898019633497103	3095290253419125	2519897110415311	1.12418e+16	1978150650291796
LRRC41	-3.84103e+16	543982357345321	1.71682e+16	3.42115e+10	1696792812689275
RAD54L	8957262534349852	9934810207267242	54803510098691	814906185108533	8762782307535242
TSPAN1	-6388105572191923	1.68195e+16	3.41954e+16	6442908043474095	1.26286e+16
ENSSSCG00000003909	1.95337e+16	3367370821881776	1.71679e+16	3.1796e-25	1.74524e-21
MAST2	117528464893572	2371473709359907	184002691904189	1.79033e+11	9.39595e+10
PRDX1	3.20043e+16	7155678224271163	1011567888669218	1.47013e+16	4935281900283254
TOE1	-1.07425e+16	3.2855e+16	5309620345450128	9419118415026436	962915311556302
ENSSSCG00000003919	-8686332564016823	1.63605e+16	707902709804601	7.79913e+16	2.11183e+16
ZSWIM5	4406270249684895	3.98895e+16	1.0059e+16	7511231898443852	8304322392050791
UROD	5377595155012175	5483495409595198	2.28022e+16	1.79557e+09	1.12738e+11
HECTD3	-2.61262e+16	3.02401e+16	1.84737e+16	8918859767482725	9294748342759992
BTBD19	-2.95764e+16	5764392037700051	6.05223e+16	8056722868569954	8701597713914238
PLK3	2810790187579076	1.62671e+16	5132556540716529	4737328945006258	6030568311336351
BEST4	-669638717900788	3.067e+16	1.23034e+16	4.52145e+16	1736347402317948
RPS8	952371165799755	1.16936e+16	3657491184410755	5581762278282603	1.12333e+16
HYI	-4141342523743641	7311716978358503	3322452271517026	8.21085e+06	7.42466e+07
SZT2	-3.62381e+16	4068857038858972	8573819049190107	3.41031e+16	1.03262e+16
MED8	1704317769662878	5737348139595739	4075670623163788	4.3505e+16	9122868492275216
CDC20	-8259103762942867	2.19412e+16	6804206335580432	7942091587666367	862357137991746
TIE1	-7797172018623647	2.66366e+16	1.01696e+16	1427748632458024	4.81362e+16
C1orf210	5862666088089208	6809063434213332	6894033057007766	1.01488	19.0539
FAM183A	4.06118e+16	3.48475e+16	3.62974e+16	5.67556e+16	1.13928e+16
PPIH	-2.42163e+16	5610537170525503	7993058758590051	4695701851527046	1.36407e+16
ENSSSCG00000003965	-2.03849e+16	5659585758463286	2.95351e+16	8569101024830873	1.59044e+16
PPCS	-304495939254774	5090199427613844	820051276955246	4187855235515207	1236612195704475
RIMKLA	-7102012161768216	1.59768e+16	5052408143512113	2.45917e+16	5645159713584087
GUCA2B	-1.48917e+16	4.80085e+16	7537230176554323	0.0038982	0.0805582
SCMH1	-3633463972812803	415212194314412	9367195134929028	2.20903e+16	7068823216915147
SLFNL1	2431044973978103	603316902690271	3785403573210475	5383854494033177	6605262827780595
CTPS1	3918122163186602	2.10133e+16	2.57264e+16	1.08726e+16	1.92649e+16
NFYC	-5640018270260503	5679953318163826	3552046837881751	2.52385e+07	2.452e+08
ZNF684	-4453863006637035	3.00801e+16	6.40958e+16	1.13506e+16	2.9146e+16
EXO5	-8999197348031166	4604585452867623	4939933229213654	20881.7	278989
ZFP69B	-3798030147837837	4342958309796022	7840299924749015	5109412861167475	146914799236272
SMAP2	4974098451976154	4617212385269438	1532883749442302	6954124698540156	7888267683252572
ENSSSCG00000003984	-9118433062819348	4335115483433599	4546431026997387	15544.6	1.92326e+06
ENSSSCG00000003986	-7458788799821866	474299800707286	4.50561e+16	19147.5	2.3488e+06
ENSSSCG00000003987	-9291282421830704	4677104543301954	4041257465004352	2.05613e+06	2.27163e+06
ENSSSCG00000003989	-5400891404096143	493606532480398	1.91959e+16	1.17964e+10	6.39143e+10
ENSSSCG00000003990	-7450521539438134	4267543241290196	3552143364240981	2.52259e+07	2.452e+08
ZNF606	-7370380464908737	5049019291924553	4505233222327375	19183.9	235159
ZNF274	-9241023334057616	2825130076544499	1.34972e+16	2389165682782959	9886499530075462
ENSSSCG00000004001	-2.97158e+16	7417274254957771	1.75365e+16	2.8184e+11	1.42199e+16
RPS5	3524363868044526	1.03112e+16	4.19444e+16	5172143687551474	6412624735986594
ZNF584	-1561057732969523	3.96627e+16	1.22739e+16	26791615015629	3933834424896625
ENSSSCG00000004008	-614493577322071	2.96776e+16	944847326201478	2.11325e+16	6793854193236294
ERMARD	8332719301554344	5085416695935901	6047954402066571	4.36754e+16	5681529337534491
ENSSSCG00000004017	-3702184624562192	3957293382950563	8407405977491798	3736954950035213	1.11875e+16
AFDN	-4574853423916172	4.58562e+16	1.41136e+16	1720973164722954	7373620102300478
SFT2D1	-2580288238197084	4838705772118362	6665436713208798	9830056380975988	2.57518e+16
RPS6KA2	-4452816220332494	2349431102164154	3.61473e+16	5727013297152625	1.1472e+16
CEP43	2.27131e+16	4412058464976405	4277099397183789	3862921634175616	8259205354796767
ENSSSCG00000004024	-24230911356889	4.36218e+16	1669890938023841	3.36366e-24	1.79482e-20
PDE10A	5618027109342087	-9056627460573616	4.54858e+16	153753	1.90506e+06
QKI	-7641100151422102	4949659478856135	3739452183525598	964928	9.88735e+06
PRKN	-4.58436e+16	3208143176132308	463446682119384	3133587968666704	69293296349465
AGPAT4	-4.93969e+16	4345895320327221	1143308260474287	7214788820108531	2.6287e+16
MAP3K4	-2.70117e+16	4597316977048303	5023768566683237	2500169811056957	572782489612743
PLG	1.30811e+16	-1.31674e+16	2017128327485919	1.55533e+16	2.56444e+16
IGF2R	2.79773e+16	3.87793e+16	4867727544690456	2.73635e+16	6180997566559473
PNLDC1	-6036847123448013	1110234275481309	2146347955183555	1429094691413729	2392466926324975
MRPL18	1.28525e+16	6488962573711898	2.30778e+16	1.28728e+16	2.20211e+16
TCP1	-3722180950193124	3.52629e+16	673372864454997	9460663519902240	2.49128e+16
ACAT2	2.09389e+16	5441615154445511	2.22954e+16	1.35394e+16	2.29203e+16
WTAP	-1.79513e+16	6.08884e+16	3.82007e+16	5.0642e+16	1.03746e+16
FNDC1	-1.39692e+16	1.11882e+16	1012972759506045	1.45897e+16	4901626197761826
ENSSSCG00000004054	-4633105977979489	1.3477e+16	1.38094e+16	2.39942e+16	3607290937921842
RSPH3	3.70294e+16	4089099133186853	5769313471185633	8101799018522864	8729740347721459
SYTL3	-2984334642163962	1.12151e+16	6738351076796025	4.11718e+16	5439180264830279
EZR	2.56228e+16	658492945830165	1.07029e+16	1069698293860598	3.72675e+16
TMEM242	1.23251e+16	4835128574647856	1364165675800777	9070205223540076	9399049244090502
ARID1B	-1244863658506896	7362164312733286	3.42912e+16	6405611395166168	1.25698e+16
TIAM2	-2.55923e+16	7164762895913174	318544037348774	572483941671327	6902246054358392
SCAF8	-379272724140292	5441319558562898	1676942972121397	4.22078e+10	2.05669e+16
CNKSR3	3.13865e+16	1.91498e+16	4673116363313312	4942265482435272	6207093608523786
RGS17	-4019501810690541	5207672803217262	1.018e+16	1.41975e+16	4791359817429212
MTRF1L	-2.17072e+16	4.00797e+16	2528025031332394	1.1184e+16	1.96972e+16
FBXO5	-5823404852552356	1.15033e+16	1666654247026102	1967072704157822	3.09164e+16
ENSSSCG00000004082	4835700715722859	4168715694905264	2.21116e+16	2.57245e+09	1.56887e+11
CCDC170	670864546915491	3.2072e+16	1.23161e+16	4.49061e+16	1.72681e+16
ARMT1	1.58193e+16	3278230476319716	1.08881e+16	2967346166998283	424945668369052
RMND1	-1.14764e+16	3.69431e+16	6711242410125884	9347086022886818	9575767440954032
ZBTB2	-5596200725221135	2.61961e+16	8973993435566996	7645080358861388	8404321978886083
MTHFD1L	2.62143e+16	1.0116e+16	2.62683e+16	6082830484512657	7198085007840562
LRP11	4364761038291452	6011575855091779	1723474237862297	3.3034e+11	1.64268e+16
PCMT1	-9639668663619548	6.94143e+16	1.86699e+16	1.7182e+16	2777189362321416
KATNA1	-1.18428e+16	4250945592339928	1.0234e+16	3117130386561295	4411902949197989
NUP43	-2031012199663425	3.75504e+16	2253204181287749	1.33338e+16	2.26636e+16
LATS1	-4.09213e+16	5063735156532467	1.55497e+16	8.03657e+10	3.68771e+16
TAB2	-3582984041492224	5115676305795067	1.34439e+16	2458086279033095	1.014e+16
STXBP5	1.41305e+16	6.08217e+16	3160955692679483	1.02657e-54	1.29145e-52
RAB32	-6326111154851502	4.63672e+16	3.73109e+16	5413143427196108	663179580956155
SHPRH	-3.78131e+16	4167938285627683	1.0142e+16	1.44928e+16	487217184259928
FBXO30	-2.85103e+16	3.45066e+16	2.90639e+16	8822943501872378	1.62844e+16
UTRN	-1.04037e+16	662809801156991	1.04254e+16	1.77932e-09	5.31482e-08
STX11	-1.49452e+16	-1.17879e+16	1.10677e+16	7393744312639966	8210913777105635
PLAGL1	2.0117e+16	6805909895780464	2779491787203899	2.10141e-46	2.13046e-44
ZC2HC1B	2.01725e+16	336490388656964	2.13182e+16	2.7774e-33	1.98624e-31
PHACTR2	-1.43805e+16	2392476678946099	2.07463e+16	5.24336e+09	3.02441e+10
FUCA2	-1.46138e+16	4762812942928593	1.505e+16	2199032123610634	337491706593315
PEX3	2.12891e+16	4599830632724886	4668924518396759	3071315481153294	6812628354913387
AIG1	4.72756e+16	6602419108971942	3586786344170416	2.11163e+07	2.07019e+07
HIVEP2	1.50392e+16	4839509363944066	1713817078460211	3.69313e-24	2.01428e-22
VTA1	-1.30689e+16	5705977053749048	2.23572e+16	134853858648147	2.28491e+16
CITED2	-2542069393239628	7652861650230279	1.12509e+16	7958331730345147	287189797681111
TXLNB	1.55544e+16	1.22629e+16	953101217363077	7575319618184995	8352138793463305
HECA	4.60852e+16	3.11131e+16	8265303580511318	7737337815102393	847492959919223
ABRACL	1.25787e+16	445186609127319	4503172354050824	19386.8	23747.8
REPS1	-1612457419684887	4744093430778719	1.75714e+16	1849818187144365	2946817308016742
ECT2L	-1421267108775109	1507160545904377	4536857080668127	3.31724e+16	7267409333767363
CCDC28A	1265095836145921	5230671665186273	1.202e+16	5.71795e-13	2.01944e-11
NHSL1	-1.94274e+16	3.59965e+16	6.05434e+16	7.19731	1189.32
ENSSSCG00000004150	-5707374799684094	5191013680245542	2586725148272784	3.65721e+08	2.57484e+10
TNFAIP3	7534695488931605	7930991643554368	2599057609659642	1.06927e+16	1.8995e+16
IFNGR1	-5922052007367467	3.60174e+16	146109979573935	1.32141e+16	579062320834854
SLC35D3	2.1671e+16	2.45348e+16	7784430323670277	0.00111491	0.0240495
PEX7	-4.88091e+16	4442640122752204	1.21183e+16	7277545548274822	8126987737801368
BCLAF1	-3.81623e+16	6854406949129467	2291317723289253	1.69486e+10	1.06648e+11
PDE7B	-7190437293650656	9981136565875804	2.88646e+16	8932695318869517	1.64447e+16
AHI1	6584667736959033	5626411451701151	6016088757504234	8.7412	1438.92
MYB	4.402e+16	1.29466e+16	1.0852e+16	2.06743e-09	6.5141e-09
HBS1L	1.47674e+16	5241503943611899	274752982139006	8683483883284671	9135069567747744
SLC2A12	-8418068301165657	1.00907e+16	4788341719833979	2865299949789551	642285563812072
RPS12	2.9266e+16	1.21499e+16	1831504311073929	1.87223e+11	9.79595e+10
SLC18B1	-5437767195788248	2939459079863001	9181722379834174	2.44444e+16	7721756369290822
STX7	3118883707635884	5912869211842328	1.45945e+16	1.333e+16	5838452577716049
CCN2	-5640763389121048	1.26891e+16	1.41839e+16	2336689348028646	3.53302e+16
ENPP1	707456947635295	3.90515e+16	2.22781e+16	2.3588e+09	1.44882e+11
ARG1	-6193480195645167	1.11074e+16	4997283952285159	9436433096867136	9637407823631818
MED23	-287707347564548	4024568264865286	5573140395110107	1823802258277236	4.37484e+16
EPB41L2	-1.48412e+16	1.83294e+16	2.0414e+16	6.23712e+10	3.54775e+11
TMEM200A	5336790138819418	2.22514e+16	3.50123e+16	6132344415191255	1.21358e+16
L3MBTL3	-1.01528e+16	2091544639108213	9338796267079600	224352843879197	7160594933811037
ARHGAP18	1241855509227838	3.32164e+16	1.04672e+16	1.44099e-08	4.32674e-08
ENSSSCG00000004207	-1.30511e+16	2.37047e+16	3230420831300743	7228211184506234	1.38369e+16
PTPRK	-3.96426e+16	4690330010533798	3627614985962536	7.05151e-66	1.1253e-62
ENSSSCG00000004213	-1.77945e+16	-1.70045e+16	1.64594e+16	6849612873906729	7803614349668327
KIAA0408	3.18738e+16	7035983808590088	1.29355e+16	3.22401e+16	1287140605983577
ECHDC1	2.32219e+16	6322874509033243	6853283536131924	8847851569004677	2352193765105593
RNF146	782872949653337	63745995920221	1.03274e+16	3.09515e+16	4386201624099673
RSPO3	3.16309e+16	3.87963e+16	1.90676e+16	2.26325e-27	1.3981e-25
TRMT11	3.57443e+16	4614196398041098	1.13937e+16	7357060499161484	8187027508802797
HINT3	-1.31944e+16	3845848087103856	7992919661026097	3713051443497141	5032196400776381
NCOA7	-2083171619908647	5.41892e+16	5046309228963375	2.46785e+16	5662802706969192
HDDC2	-1.47611e+16	5084124671067069	2.36492e+16	1.2409e+16	2.13699e+16
TPD52L1	4809324994135531	2.90866e+16	1485667166550046	2228899422261012	3409521748705826
CLVS2	3480777091847895	3358053189790952	1.50899e+16	1.10255e-19	5.22046e-18
SMPDL3A	-4136031220956636	1.38201e+16	5461707945601137	4.59887e+16	5901820194927679
PKIB	-1546393636994192	7816515112091689	4318708307112678	497480	583667
SERINC1	1822320437219395	6.39132e+16	5001259456118142	2.53289e+16	5789793446428022
HSF2	-3384978264338532	498237224822376	837938415012134	3795009953612593	1132784838076083
GJA1	-6891759955875888	-2.6992e+16	1.14762e+16	7347868373660837	8179854761661577
TBC1D32	-1.01558e+16	3383171456602696	4.55687e+16	4996465062444855	6254980670494423
MAN1A1	-314726487744749	3.01868e+16	2769052308765989	9610304386080046	1.74296e+16
FAM184A	673059666421427	3.99924e+16	2.13631e+16	3.80017e+09	2.24455e+10
ENSSSCG00000004246	-8208786751297742	2446370846782486	6999747699027855	8152120489165747	2192257709951188
ASF1A	4325911387998087	530763612106617	1.95098e+16	6587073664227993	759996081155238
CEP85L	-1.26899e+16	3584859674095885	4960310319616106	4.81249e+16	6095187423952293
SLC35F1	3051076439276662	8561124994925277	6080543790514703	9378456791034662	9597750518382322
ENSSSCG00000004252	-3.14362e+16	46317470154474	2.56327e+16	1.08457e-41	9.78666e-42
ENSSSCG00000004253	-4.5572e+16	6686107319103338	2.45281e+16	7.32327e+08	4.88644e+10
DCBLD1	-1900088687444405	3756733889248726	7192882796172108	0.223101	4.39947
ENSSSCG00000004261	-1.12633e+16	8925015561032064	3.96918e+16	4634023949924601	9621419440663836
KPNA5	-3439126399321307	3757897496378295	647223355388736	1.09573e+16	2827075055995414
ZUP1	-3.70977e+16	4074166497496326	8488206086604194	3574560926304556	1.0763e+16
ADGRB3	4037514913919974	4634809887090621	1.19396e+16	1.25093e-245	1.65844e-242
LMBRD1	2351421135847018	5259638602470445	6.00321e+16	1.42799e+16	3.54273e+16
COL9A1	-1.37109e+16	1.78767e+16	2.96852e+16	8489961019244353	1577962667601385
FAM135A	-3706038869299761	4.89978e+16	8747309110510212	3.10059e+16	9505284507063094
SMAP1	2.48641e+16	7014160863713254	1.19903e+16	5347817883658946	2.01112e+16
OGFRL1	787286495194275	2909384859041865	1861828797951373	1.59681e+10	8.44464e+10
RIMS1	-9231438808244598	1.65465e+16	8474915147821468	3600771792431494	1082681469688709
KCNQ5	2414973644850677	1.87359e+16	9288262917834904	2.30627e+16	7339440508068794
OOEP	-1269833384064681	-4300508841825838	1.17084e+16	2792296905819195	4056409067076351
CEP162	-6826159716384705	3585814063667935	1.92638e+16	1.13847e+10	6.18389e+10
NT5E	1.9111e+16	5922619431811137	8418768142756864	3.71367e+16	1.11236e+16
SNX14	-3371662933347612	5465641710207995	8940440690232077	7649356986414108	8405307927029801
SYNCRIP	-6361590915230234	593799056788152	4875746253771851	4.85011e+16	6129321137664745
SMIM8	-2.47819e+16	5482620701006963	4817469171633105	2.81727e+16	6332353120231057
ENSSSCG00000004302	1.30111e+16	1.23103e+16	2082733926744985	5.02604e+09	2.91074e+11
RARS2	-8973250866372648	5189580957017025	7512256461145832	0.0442381	0.00910925
SLC35A1	-1.02607e+16	6845837779735099	1368348470719885	1.31043e-15	5.50861e-16
ORC3	-4.00324e+16	4792856190500668	1.5199e+16	9.67533e+10	4.36644e+16
AKIRIN2	-7745467210399336	5128576462463453	2.95043e+16	5.57939e+07	4.51247e+09
CNR1	-4.11314e+16	-1.9412e+16	43310464868	9947491048160104	9965994780854468
RNGTT	-2.50235e+16	4503944992655178	3082749631485279	7912665080946096	1491086624427137
PM20D2	1815116837617737	6077692692006043	3.97584e+16	4.61575e+16	9588104732366608
UBE2J1	8192879021829547	5047052795575867	6663536731440551	4143257784019385	546525699583454
RRAGD	-9272683801362220	2833628113749784	2202357080356315	2.69323e+10	1.63673e+10
ANKRD6	1.23117e+16	474704136885442	8630485871325473	1.54229e-05	0.000378652
ENSSSCG00000004324	-6209571466740854	6.13738e+16	5217110928603327	508.691	71686.7
MDN1	-1.30871e+16	3421090727621912	5730837249027312	4.49036e+16	5797541058117518
CASP8AP2	-5696617041449227	4380982655422607	1.25047e+16	4059367777091664	1.57859e+16
BACH2	-1176733190374332	506205126571885	43610033658005	3677064169120114	7923756058362735
MAP3K7	-1.57061e+16	3.76497e+16	1097116887118652	2948996987975696	4227746056210374
EPHA7	1879603417548782	2298479415637591	5.64307e+16	5.82142	906.343
UFL1	1.06715e+16	5766606911854848	1322784424489635	2.50093e+16	3.72694e+16
FHL5	-3721120551250245	-3.38958e+16	3.43814e+16	5576357579896982	6780621058947685
NDUFAF4	-3.25207e+16	2.03779e+16	1.64544e+16	1.99581e+16	3.12678e+16
MMS22L	-2.65968e+16	1.41646e+16	75596270318	993062791072361	9956045142302448
FBXL4	-2283695540545254	3.56411e+16	2.65427e+16	1.03272e+16	1.84867e+16
FAXC	-1.70332e+16	4700356189621204	2476222276435196	1.1558e+16	2.02194e+16
USP45	-2.74653e+16	3886496675828392	3.29964e+16	6929504078097859	1.33755e+16
CCNC	8116376876779997	5661188712598184	840856178829823	0.000473805	0.011279
SIM1	5391114908295087	5375784013371029	1.34289e+16	2477792963589162	1.02189e+16
ASCC3	9113261568942828	5617853187604219	5.26076e+16	4073.18	5801.76
GRIK2	1.59285e+16	4296229937106135	3752470328584348	902625	9.30427e+06
HACE1	7596048522099953	3800381544279908	2811729172608155	5959334738417295	7096602930741523
BVES	1.93695e+16	1.15429e+16	4.94723e+16	2011.95	269014
POPDC3	-8493777855492092	3860721964331429	1631548971752433	5.36238e+10	2.54673e+16
PREP	3493155716284715	435358973800087	9168304768846688	2462425607557301	7774300301566237
ATG5	-9875583968750666	4284813443117923	6981034364933296	4.03422e+16	5362879313785556
CRYBG1	-3264709550626457	3.40425e+16	1.47712e+16	5.48333e-19	2.52688e-17
RTN4IP1	6419788739762889	3.43317e+16	2465948032660104	6.84074e+08	4.60548e+09
QRSL1	1813543548968959	4109480548570028	1.9639e+16	1.61097e+16	2.63776e+16
SOBP	6839893169674945	571258484337426	4242033497326476	5148470714127314	6389709279036816
SEC63	-5234780425320614	6363332117234442	3.35374e+16	5625119744174764	6820185634249176
OSTM1	-9475783320982668	3.62292e+16	4265031774115968	9479294012658096	966319467132917
NR2E1	-3318732050281853	732199229614984	3331705028599554	5637981181664963	6832895412839859
SNX3	2030876210764342	7393251312805985	6515063418659928	7985329325366304	8653888945143893
ENSSSCG00000004387	-5535262887498393	5257496967779498	2264444381890941	1.94923e+09	1.21633e+11
ARMC2	5909860234698748	5168440149829808	2.84513e+16	9.60873e+07	7.48335e+08
ENSSSCG00000004389	-4291293734187947	7929564872452789	1.13599e+16	2.86501e+16	4.1359e+16
SESN1	-3.92062e+16	6051861684409737	1826567845740882	1.92138e+11	1.00227e+16
CEP57L1	9962577305610692	2853012299242619	2841713858166868	5939800862251458	7078721329062638
AMD1	-2.31626e+16	512476489300377	4233849339844137	3962547495020534	8439756064839211
GTF3C6	-1.38947e+16	5555682948065976	1.78722e+16	8936502590675343	9306898005250844
RPF2	2.45433e+16	5458762392869105	3496070166386289	851678030680953	9026917691892396
ENSSSCG00000004396	-2511103798509639	2814529834028018	8879284340601197	2884245834463387	8926194461658552
DDO	-4353004314095292	-4.95585e+16	3026091632686496	5822513145334542	6980323481774356
METTL24	-587571031954739	1.41656e+16	3.18124e+16	7448804185979108	1418565084479005
CDC40	-2.17743e+16	5249562991693823	2.78014e+16	9543956159995264	1.73312e+16
ENSSSCG00000004404	3183003305141925	45910701323908	7137657010867646	7548171662999953	2053879674957439
FIG4	-2960179336909662	3359798152635333	2.29752e+16	1295809662368318	2.21407e+16
SMPD2	3.92949e+16	4676930758176053	1.49875e+16	1.08225e+16	4.83569e+16
ZBTB24	3.35641e+16	2099028270521992	1.53511e+16	2.15347e+16	3317397784160539
MICAL1	2753916215636614	5915991590711426	4.11748e+16	5210836671071503	644575970903017
PPIL6	5645461353479857	3.05587e+16	1.02077e+16	1.39859e+16	4725468179323676
CD164	2.22313e+16	7.6333e+16	1096429164430934	9288444635855424	3.2926e+16
ENSSSCG00000004415	-1.35172e+16	7808086533002442	86268665812673	7689754771683804	8434787699498278
SLC16A10	-6398564298776421	6450572365768831	4.43705e+16	5053397423301064	6308968097833672
TRAF3IP2	-2.1255e+16	3469753473635161	2095244259117372	1.47758e+16	2.45552e+16
FYN	180918002120421	6449448367876213	4549655751483026	3.29254e+16	7221540791280766
CCN6	-8811990743066976	2.54316e+16	1.23442e+16	4423660591205857	1.70563e+16
TUBE1	-3426903306571561	2.15958e+16	1.2397e+16	2.65529e+16	3.90577e+16
HDAC2	-1067913849934582	7134352382049899	1708541618828769	1.91175e+16	3023395035103802
HS3ST5	-2.42036e+16	1.50188e+16	3.03439e+16	3.61836e+07	3.00397e+08
FRK	-3.93919e+16	5647370556504057	6597583847348165	4166452555030181	5486614439635175
NT5DC1	3.09997e+16	390853068481557	514538342688553	9819027872944836	9877484701465256
TSPYL1	-1.81392e+16	580151319316674	404591885756475	4427826778829241	9260234744948668
ENSSSCG00000004441	1.0026e+16	-588600956847884	6775482637879771	4104322511985653	5428023211638485
RWDD1	2.02994e+16	7408093105343986	5936467814262283	1483071167827027	3.662e+16
RIPPLY2	1793172462897885	5228956337615155	3147462286265162	2.01983e-55	2.5226e-52
PRSS35	-9528622655153696	4160457257733871	3.10893e+16	2.46427e+08	2.08809e+09
SNAP91	1292443657771899	5351358462325386	1.92815e+16	7.7263e-29	4.93195e-27
ME1	7101884171131931	1.59929e+16	8197749344372317	4194238681965131	1.2378e+16
PGM3	1.00558e+16	5652068601603221	1.43778e+16	2304995538261748	3498907706706115
DOP1A	-3.47634e+16	4740906220421079	9357425217567368	2220839089867792	7100011447573993
TPBG	-223029471313015	7402558514647513	1.15861e+16	6644649582216548	2.44239e+16
IBTK	1.29952e+16	460571491412786	1.14333e+16	2849504703795109	4.11967e+16
TENT5A	6592527133627837	3.67361e+16	1019151197693138	1.41089e+16	476422749497801
BCKDHB	-9207756882337740	4.95868e+16	7339305462234347	0.106239	0.00214658
LCA5	-5477395126872264	3671784546917187	1.34854e+16	2.40432e+16	9944425481166996
HMGN3	-3.40293e+16	8749141018522337	1.92918e+16	1.12189e+11	6.10152e+10
IRAK1BP1	6683274197920641	4825090806590419	2.94729e+16	5872058876385796	7021120872751289
PHIP	-1.36991e+16	7084038654919401	3368055765032546	664721580628889	1.29501e+16
MYO6	-6418377111335308	6016606403519755	5.13527e+16	771.753	107009
COX7A2	2.35413e+16	9183698030168840	1.50211e+16	1063142201901081	4756816160375164
COL12A1	2766246021445262	-2739617972484904	5034697169342617	8224606134194854	8816365205154871
CD109	-5465335107944149	-1.52881e+16	3.53543e+16	5521142042399623	6728504422417222
SLC17A5	1.01823e+16	3.68741e+16	6081365600527469	4354902920989455	5669831020559258
MTO1	4292460396151191	3241726284209342	817899952566199	7748861620963713	8482161323423918
ENSSSCG00000004489	3280802927276312	1.28384e+16	1296971649075811	7187462355082525	806434591930641
SETBP1	1.39955e+16	6939700769278494	3.28632e+16	6985938396421151	1.34664e+16
SIGLEC15	-4682472619964187	5199077810942007	2001154981691075	7.69758e+09	4.306e+10
HAUS1	7544296587029516	524547419306239	7441307114024767	3883408684764606	5207387277827588
ATP5F1A	3.97103e+16	8803329530612384	3.49452e+16	3.39119e+06	3.24346e+08
C18orf25	-1.89917e+16	421248535703967	1.79413e+16	1.80424e+16	2.8889e+16
LOXHD1	91835963944352	2.41676e+16	1.66205e+16	967480682946844	9794143653796684
SMAD2	-9029509219649716	5784252002757085	8940230385689595	3.22161e-05	8.27489e-05
CTIF	3964407377569924	1828834869953639	2.35348e+16	8780745946330629	9202563477349248
SMAD7	1.32081e+16	1.81414e+16	4116717554885693	1.3975e+06	1.56402e+07
DYM	-3.98709e+16	4491270674064128	8519194165259794	3.5142e+16	1.05998e+16
ACAA2	4.30727e+16	5015331688412219	2.48337e+16	6.24956e+08	4.23393e+10
ENSSSCG00000004511	-1.90312e+16	4230610511615479	2.73034e+16	9845853040429352	1.77764e+16
MBD1	5040303697688967	5.71185e+16	3601222367328575	1.96084e+07	1.93557e+07
CXXC1	-1.41157e+16	5304105098360271	1.06851e+16	3.01281e+16	4302055951345881
SKA1	9355975186012280	5732693096127152	403618728348197	445343285754971	930475394591699
MAPK4	1.25683e+16	4261530283872917	8356870893345695	6.15395e-05	0.0144895
ME2	1.17407e+16	4609647680312231	1381446298785319	2.39855e+16	3.6063e+16
SMAD4	-4189248801004591	6250243942808609	2.13162e+16	3.89422e+09	2.29538e+11
MBD2	-2.25506e+16	3.798e+16	2.86963e+16	9026535663442744	1658907465978201
POLI	-1.43406e+16	3.46447e+16	912257971826234	3.39516e+16	4.71444e+16
STARD6	-1.59831e+16	410762624990945	6737498879414793	9440689290824898	2486404033119913
C18orf54	-7243943274421444	2.07846e+16	7792452951646829	5.24649e+16	1.5027e+16
CCDC68	2.05627e+16	3912800352276557	8994592154196486	3429267567505664	4.74955e+16
TCF4	3.65523e+16	7819309510160358	2.99329e+16	4.47261e+07	3.67424e+08
TXNL1	3196015447202894	6828642219511798	1.97211e+16	8.96071e+09	4.96425e+10
WDR7	5791038826868308	352171261642747	1.61604e+16	687683911591667	7826355134893278
ONECUT2	4096416884773402	4140342155686164	1487473213926342	0	0
FECH	3.5698e+16	4488534394646137	1.39081e+16	1919645200938769	8131011314372004
NARS1	2.92327e+16	5119010834096508	6853599007189892	7934804246678171	861837353110022
MTFMT	-5937194146877046	7001770675278789	1.88094e+16	1702277635049053	2758438796546674
SPG21	1.3527e+16	59665312373101	1.72554e+16	1.88981e+16	2996599394361189
ANKDD1A	811545417268123	1.91898e+16	1.41041e+16	1729627531919198	7404404002142916
ENSSSCG00000004547	-6455520747166713	9907902697794314	2550736366006968	1.10243e+16	1946957418901579
RBPMS2	-3086904930721085	2.74107e+16	2123026228598813	1450995927507231	2.41973e+16
OAZ2	2632829382877113	6502560362400505	1.16493e+16	732870230806357	8163264026334623
ZNF609	2.3443e+16	6673813952526361	7099257036253803	9787433350076188	9863528475151204
TRIP4	-691864452866648	3634228908498049	2.17656e+16	6408318978808538	7460644258292701
PCLAF	2.27553e+16	3344830988754872	9249340501291848	6.75495e-07	0.000177743
CSNK1G1	1.23539e+16	3.8958e+16	6453588746705208	9359714334031648	9584378619632552
HERC1	-3.29908e+16	5794869876495578	1187621716343633	5685530138526345	2.11916e+16
CA12	829395155034561	1.79571e+16	1.21334e+16	4952580850983505	1.8822e+16
LACTB	1969141833838008	3084016044384507	1460130280454902	2.26909e+16	345719889211725
TPM1	6682612323064167	593927505430741	5235431647173803	4.69334e+16	5990501678278515
ENSSSCG00000004572	-6623558706828037	6054289408999681	3.02369e+16	3.82365e+07	3.1607e+09
ENSSSCG00000004573	-5073260179954626	6549338488042141	2.80775e+16	1.16556e+09	8.92816e+08
RORA	-5771777677308626	8578206017545497	4396324132696874	33460.1	3.9909e+06
ICE2	-3.28943e+16	4695100781993981	105377220011559	1169624927260949	4028474344792658
ANXA2	-1.60128e+16	9628435235360964	8033119599111804	0.000316631	0.00710563
BNIP2	-6962000018243983	1.63975e+16	5.07439e+16	2.42818e+16	5582945108216957
ENSSSCG00000004583	7050853298237961	7306211516874578	968903030134872	3249539124476594	4.55369e+16
FAM81A	7543271474017116	4787384379553673	4538412049652223	500516449325991	6261905490805354
MYO1E	-1.17056e+16	623490444492426	7040702792195616	0.0482477	0.0928069
CCNB2	2.50292e+16	3408649784880535	1.77788e+16	9663672074604666	9788028136301746
RNF111	-3.78226e+16	5048714413026618	150135481452085	1.06742e+16	4774721403084024
SLTM	-2.90836e+16	6060181667002489	8478364755142007	3593950150036286	1081007518950705
ADAM10	-1723358507861847	5210253322338632	3.55892e+16	592264212601905	1.17843e+16
ENSSSCG00000004598	6420918224106742	2.76607e+16	8388610396321747	3.77579e+16	1.1279e+16
TCF12	1.92183e+16	7488743856458849	4282521343445946	3850618827076804	8235966180772986
MNS1	-2.86036e+16	6043191982576271	4029114801704026	8409123980386264	8945821356827187
TEX9	3829275116388096	5561559521667583	1.63172e+16	9677785465150692	9795256671869434
RFX7	-1.92264e+16	520352524469566	4053407084690951	4408228997015735	9228206821761956
PYGO1	-3.50994e+16	2.98164e+16	2.84367e+16	917343694285474	1680172005420844
DNAAF4	2.90856e+16	4534225181911139	9047925504862468	2.62993e+16	8232265491328364
CCPG1	-1.19447e+16	6623928922168927	2291983402830496	1.30044e+16	2.22043e+16
RAB27A	400673904090215	484882813352186	1.66785e+16	4.42805e+11	2.14315e+16
WDR72	-2205831999920599	-6279365773894842	1.37648e+16	2.40702e+16	3.61494e+16
ONECUT1	-2.12431e+16	2968305600445684	609519203732899	5.84859	97.3917
FAM214A	-1.83376e+16	5510791693887545	2683637488596588	1.01384e+16	1822436055753443
MYO5A	2.65441e+16	7176117159566596	1.63398e+16	5.29414e+10	2.51715e+16
GNB5	5286280021297918	5660486169198805	1.49493e+16	1.10438e+16	4919629710934901
ENSSSCG00000004623	-1105328105624757	-8133310823842602	4.65117e+16	8292482683293368	8863698147343019
MAPK6	2301202294091577	3992503690949079	245254270404606	1.17335e+16	2047015475616369
LEO1	-7598365736014845	4708294484291641	3150983725732299	574568341917888	6919255870101588
TMOD3	-2.17597e+16	5173634816917007	4579935288064374	3.23484e+16	7114014323858432
TMOD2	2.66919e+16	31979883325051	3.07616e+16	7944801822747943	1496488081038916
LYSMD2	4.6755e+16	4984374139068622	2.64577e+16	2.69377e+09	1.92724e+10
SCG3	1.16904e+16	7.45593e+16	9469369400319288	2.22246e-06	6.00378e-06
AP4E1	-1.27244e+16	2.13449e+16	2.71348e+16	6024290665673974	7149109901479505
SPPL2A	-9204642088078524	395766031446221	5041505006109492	4.77682e+16	6066231239949886
TRPM7	-3404354921193671	5718258760017887	1.5274e+16	9.29861e+10	4208549023479342
USP50	-8212246890186313	2.0711e+16	935382911437522	2.2252e+16	7.11132e+16
USP8	-1.37613e+16	5816251996368745	2578828599052075	1.08302e+16	1.92026e+16
GABPB1	-1.5221e+16	4411723712001038	1.9333e+16	1643980764072607	2680099174119503
DTWD1	3.45912e+16	4071023280559064	8448030167127705	3654390402885054	1.0967e+16
FAM227B	2.18606e+16	3991882175902979	2.49036e+16	1.14546e+16	2.00834e+16
GALK2	5245102779475509	5032970200860792	2807443859755894	1.16738e+08	8.93813e+08
COPS2	1229925390029041	5.88072e+16	1.66848e+16	1964628742956576	3.0886e+16
SECISBP2L	-1498772560575454	4590041775956105	2.22794e+16	1.35534e+16	2.29328e+16
EID1	-5.93006e+16	8113227598394603	7870521984960996	3749929669143527	507260323739806
FBN1	1.85068e+16	4847895337509668	1.71546e+16	3.39953e-24	1.86003e-21
MYEF2	-2.75629e+16	6.17445e+16	1202961951143354	5236176401735277	1.97301e+16
SLC24A5	-4.91194e+16	1.88271e+16	3109606459148462	7783176435821536	147242355454201
SEMA6D	-1.76468e+16	2.54288e+16	2654768464022456	2.57113e+08	1.8487e+09
SLC30A4	-3010911028035013	1.83052e+16	1.35809e+16	2438692091921281	3653586422484638
C15orf48	-3.36027e+16	7679330214870319	6152102091060881	8.23239e-121	3.46061e-117
SPATA5L1	-4.19442e+16	2606186755106973	2703746855325326	1.00113e+16	1.80372e+16
GATM	-5881249491772745	3930195881247777	1.02749e+16	1.3485e+16	4.57239e+16
SLC28A2	-1.50199e+16	-9377563171463724	3.17317e+16	5732245938072965	6909242516447832
SHF	-2.04853e+16	1501161360503195	5314952728931491	2114316738716298	4961907542453077
SORD	-4.08132e+16	4445804405321808	9862540134477722	1.68678e+16	5567568464534196
TERB2	-1.47891e+16	3.49828e+16	676485053794441	9297071015584002	2.45345e+16
TRIM69	-1.18503e+16	4871122849753449	3.22661e+16	7245073967557526	1386353389928433
SPG11	5561679878778905	3924334064244565	1.82442e+16	6692827086398739	7684423078681119
B2M	8150992532796575	8377521251291459	7632818277223973	0.00240231	0.501864
EIF3J	-1.74749e+16	6705907072485143	3.59902e+16	5781352212285857	1.15594e+16
FRMD5	1806151609251297	3.25266e+16	1.07911e+16	2.81081e-10	8.76026e-09
WDR76	3506171963183174	2536641002415973	1.66688e+16	8972723637835658	9328050838874672
PDIA3	6673398216889894	8182200735850206	724421238917492	0.172003	0.342958
CATSPER2	-266997833582599	2.49632e+16	1.69193e+16	1.93347e+16	3051865952349571
STRC	-3.28367e+16	3.25185e+16	3.44542e+16	6342731127431175	1.24691e+16
ENSSSCG00000004703	1.91696e+16	5561357504683136	2.27572e+16	2.01785e-35	1.53206e-35
PPIP5K1	9801929866056448	3.52291e+16	3424372100764881	5584257850612967	6786231422584287
MAP1A	-9817610943308586	4522322439417489	8096317226519929	368229154399379	5001169502504565
TUBGCP4	-188265726312215	3.19848e+16	1184103289051638	2765222278548689	4.0296e+16
ZSCAN29	-2.37955e+16	2239491845515585	1.16696e+16	9139750632149884	9447825954843354
ADAL	-1.70362e+16	3.04325e+16	7635247281248425	9303695441124672	9547436196950504
TMEM62	1.64045e+16	3.8036e+16	1.64471e+16	1.9968e+16	312776849621263
UBR1	-7001228337471689	6330104030586772	8599067772005453	3537647806280517	4.85828e+16
TTBK2	-4462910686650343	4304713390456438	1.10136e+16	9044699558576528	3.22091e+16
CDAN1	-3218062181071648	2.99777e+16	3.26205e+16	7090051240993857	1.36381e+16
ZNF106	-2.19887e+16	4203748479433843	3.51158e+16	6094148322799705	1.20686e+16
LRRC57	-3.27895e+16	4373906488441564	6919332099041144	8526881751921863	2.27811e+16
ENSSSCG00000004729	-2.58502e+16	3.46067e+16	3021965695934302	8214384438435839	1.53685e+16
TMEM87A	-6979810635796826	5.13628e+16	3.06336e+16	3.11642e+07	2.60746e+08
VPS39	-3603125720311785	3393092843019156	5799576707301125	1603003320993721	3.91716e+16
PLA2G4D	-2.11253e+16	-7392151593891285	1.35323e+16	7129757200123392	8019067425203168
PLA2G4B	-1228480322754154	2529983169292656	3382436247166458	5608447936744119	6808593378163337
MAPKBP1	-2167574371190989	2.2308e+16	9430651974899008	9226378134209074	9500903814488464
MGA	-3.42142e+16	4735600754455797	882879219379668	2965145700741282	9139351726231952
TYRO3	-4.1568e+16	1.76836e+16	1.32415e+16	249849469498964	3.72376e+16
RPAP1	1.35013e+16	3.38725e+16	8308069051019373	3620393077332162	4.94081e+16
RTF1	-1.58004e+16	6230478603664932	4114915802039211	4.25066e+16	8941803460453195
NDUFAF1	-6265942939315444	4479359264121875	2224609724747797	637171144729485	7431579264676642
OIP5	-9251715485773786	1521631548902652	1.03947e+16	7471434043702362	8272527672055133
CHP1	-4.54346e+16	4151317030694198	1.43692e+16	1502396726993368	6512527059791424
EXD1	-8738477243978815	1.54534e+16	6902033320527918	86097772936886	2297229900554213
INO80	-1772765288897983	4.47927e+16	2.51277e+16	1.12927e+16	1.98623e+16
DLL4	6455858519574359	2.81033e+16	5000351467828953	2.53422e+16	5791968360616236
VPS18	-4012739497044899	2.9536e+16	3775960815607897	5199403133761787	1059741166158756
RHOV	-1.74348e+16	2471067544584663	3.79546e+16	72408.7	7.54513e+06
SPINT1	-6.01898e+16	4053287220851003	2439694445379974	6213537581134414	7295872002837623
PPP1R14D	1.10063e+16	1.97617e+16	2939167439578098	5.91311e+07	4.76895e+07
ZFYVE19	3098894345450345	5.07511e+16	1.0078e+16	1.50052e+16	5022612376544299
RMDN3	-3922777967713716	2457689544562088	3.75401e+16	8463694601425014	8991409252513235
RAD51	-7209794648231999	4.79708e+16	1604493229346124	2.05268e+16	3192372629102506
BAHD1	-4329350392825564	3832570175944043	7190259495058061	7330037959865436	2002745786909968
IVD	-853984910031412	5370361260889903	7134687948824876	0.0299631	0.58418
PAK6	-4.81074e+16	1.33799e+16	3673079061829398	1.3562e+07	1.36134e+08
ENSSSCG00000004782	-1.52141e+16	3.22475e+16	4653597966778152	3098852976913623	6860466417097791
SRP14	3.74214e+16	7162112294094689	2238193134297029	2.23467e+10	1.37552e+11
GPR176	-1.62853e+16	4058412958849674	1.60034e+16	2.05855e+16	3.19982e+16
THBS1	3168461604252997	3605137657656568	1.75047e+16	6756651990609204	7733657871744591
RASGRP1	-5515458053938976	3.95248e+16	9495368547962686	2.05991e+16	6647179139003796
FAM98B	-3574531308832968	4175041512141975	7539188296230893	6037123409806592	1.69297e+16
MEIS2	-4572796396806579	8822359069526266	1064214691255593	1.98032e-217	2.27538e-214
AQR	-5342133880996337	4246281192587793	9290306426594392	230369622237812	7334972176738758
ACTC1	-3.63325e+16	4573758900730499	2663304269413977	7.15643e-45	6.89057e-43
ENSSSCG00000004806	1.30952e+16	3270316962196134	554543548772083	1.85289e+16	4434134668428054
SCG5	1039391062204382	1052042221027281	1.13948e+16	1.33748e-10	4.39914e-10
PGPEP1L	-255201812098107	1116907975021648	5588652037341548	4547178308698072	5852921445139004
LRRC28	1.979e+16	5435937552810742	4347170457764424	3.70705e+16	7971426794916267
LINS1	-2.49233e+16	31278121016115	2.47868e+16	1.15399e+16	2019575241670402
ASB7	-5608920405295438	2.8597e+16	6.04988e+16	1.39072e+16	3.46575e+16
LRRK1	2758144570305374	-1848195818841339	1.86478e+16	1.57225e+11	8.33263e+10
[truncated: 15,237 more rows]

## Sheet: Sheet2
Sheet2: Enriched pathways of pig Beta,0 vs Beta,1
Pig Beta,0 enriched pathways														Pig Beta,1 enriched pathways
Gene_set	Term	Overlap	P-value	Adjusted P-value	Old P-value	Old Adjusted P-value	Odds Ratio	Combined Score	Genes	ratio	-log_adj_p			Gene_set	Term	Overlap	P-value	Adjusted P-value	Old P-value	Old Adjusted P-value	Odds Ratio	Combined Score	Genes	ratio	-log_adj_p
GO_Biological_Process_2021	chemical synaptic transmission	22/306	3.35711e-05	0.0735207	0	0	2.86202	29.4841	GABRB3;GRIA1;GRID2;NLGN1;KCND2;GRID1;GAD1;GRIK3;OPRK1;GRIK2;GABRG2;GLRA1;GLRA3;TH;KCNQ2;PMP22;ASIC2;ERC2;SNCB;DLGAP2;SLC18A2;SNCA	0.0718954	4.47403			Reactome_2016	Extracellular matrix organization	30/283	0.000341188	0.262374	0	0	2.10596	16.812	COL18A1;FBN3;COL13A1;LAMA1;SDC3;LTBP4;LAMC2;LTBP3;NID1;FBLN2;EFEMP2;CAPN9;CAPN6;CDH1;ADAMTS18;CAPN5;SERPINH1;DMD;COL25A1;MMP2;FN1;MMP11;MMP14;COL3A1;BMP2;COL5A3;MMP17;ITGA11;COL4A5;ITGA7	0.106007	3.46701
GO_Biological_Process_2021	substrate adhesion-dependent cell spreading	7/48	0.000286882	0.292503	0	0	6.20837	50.6382	NTNG2;TMEFF2;LAMC3;RADIL;PARVB;BVES;SRCIN1	0.145833	3.5423			KEGG_2021_Human	Axon guidance	22/182	0.000345383	0.0932534	0	0	2.43566	19.4143	SEMA5A;NTNG1;SEMA6A;SEMA3C;TRPC4;SEMA6D;CXCR4;PARD6G;UNC5C;EFNA4;RND1;ABLIM1;EFNB3;FES;SLIT1;PAK6;SRGAP3;SLIT2;MYL9;SRGAP1;EPHB4;NGEF	0.120879	3.4617
KEGG_2021_Human	Circadian entrainment	10/97	0.000294872	0.0646219	0	0	4.19335	34.0876	PRKCG;GRIA1;GUCY1A2;ADCYAP1R1;RASD1;PRKCB;NOS1AP;PRKG2;PRKG1;KCNJ3	0.103093	3.53037			GO_Biological_Process_2021	epithelial cell differentiation	14/101	0.00105489	0.564357	0	0	2.84015	19.4673	EHF;CPT1A;FZD7;GATA6;OVOL1;FSTL1;GRHL2;OVOL2;CNN3;LGALS3;BDH2;MCIDAS;TST;FGFR2	0.138614	2.97679
GO_Biological_Process_2021	positive regulation of potassium ion transport	6/38	0.000503689	0.292503	0	0	6.80853	51.7009	NOS1AP;FLNA;KCNN2;KCNJ2;ADRA2A;KCNJ3	0.157895	3.29784			GO_Biological_Process_2021	negative regulation of axon extension	7/31	0.0011074	0.564357	0	0	5.13132	34.9224	SEMA5A;MAG;SEMA6A;SEMA3C;SEMA6D;TRIM46;MT3	0.225806	2.95569
GO_Biological_Process_2021	synapse assembly	8/69	0.000534252	0.292503	0	0	4.77298	35.9627	GABRB3;GPM6A;GRID2;NLGN1;DSCAM;SLITRK1;FGF13;GABRG2	0.115942	3.27225			GO_Biological_Process_2021	regulation of microvillus assembly	3/5	0.00145024	0.564357	0	0	26.3224	172.044	ATP8B1;FSCN1;PLD1	0.6	2.83856
Reactome_2016	Neuronal System	19/301	0.000587347	0.344772	0	0	2.47522	18.4154	PRKCG;GABRB3;GRIA1;KCND2;KCNK9;PRKCB;KCNB1;GAD1;RASGRF1;GRIK3;GRIK2;KCNAB2;GABRG2;KCNQ2;KCNQ5;KCNN2;SLC18A2;KCNJ2;KCNJ3	0.0631229	3.23111			GO_Biological_Process_2021	positive regulation of smooth muscle cell differentiation	3/5	0.00145024	0.564357	0	0	26.3224	172.044	OLFM2;KIT;ENG	0.6	2.83856
GO_Biological_Process_2021	positive regulation of ossification	6/40	0.000669053	0.293045	0	0	6.40737	46.8356	NELL1;TGFB1;OSR1;ZBTB16;SOX11;BMP6	0.15	3.17454			GO_Biological_Process_2021	axon guidance	22/203	0.00150516	0.564357	0	0	2.15066	13.9768	SEMA5A;NOTCH2;NOTCH3;DRAXIN;NRP2;SEMA6A;SEMA3C;LAMA1;SEMA6D;GAB1;CXCR4;UNC5C;GFRA1;LAMC2;VLDLR;EFNA4;EFNB3;NFIB;SLIT1;CNTN4;SLIT2;EPHB4	0.108374	2.82242
KEGG_2021_Human	TGF-beta signaling pathway	9/94	0.00100447	0.0646219	0	0	3.85595	26.6188	CDKN2B;ACVR1C;TGFB1;HJV;FST;ID2;SMAD9;BMP6;FBN1	0.0957447	2.99806			GO_Biological_Process_2021	positive regulation of stem cell differentiation	5/17	0.00163835	0.564357	0	0	7.32148	46.9605	TACSTD2;LTBP3;PTN;SOX9;SOX6	0.294118	2.78559
GO_Biological_Process_2021	anterograde trans-synaptic signaling	16/244	0.00104297	0.305793	0	0	2.57056	17.6487	GABRB3;GRIA1;NLGN1;KCND2;GAD1;OPRK1;GRIK2;GABRG2;GLRA1;GLRA3;KCNQ2;PMP22;ASIC2;SNCB;SLC18A2;SNCA	0.0655738	2.98173			Reactome_2016	Degradation of the extracellular matrix	14/106	0.00169404	0.65136	0	0	2.68508	17.1325	COL18A1;COL13A1;COL25A1;MMP2;LAMC2;NID1;MMP11;MMP14;CAPN9;CAPN6;CDH1;ADAMTS18;CAPN5;MMP17	0.132075	2.77108
KEGG_2021_Human	Neuroactive ligand-receptor interaction	20/341	0.00106127	0.0646219	0	0	2.28867	15.6735	GABRB3;PTGER4;GRIA1;ADCYAP1R1;GRID2;SCT;GRID1;GRIK3;OPRK1;OXT;GRIK2;GABRG2;ADRA2A;GLRA1;CCKAR;GLRA3;CYSLTR2;RLN3;AVP;TAC1	0.058651	2.97418			GO_Biological_Process_2021	bicellular tight junction assembly	9/53	0.00196676	0.564357	0	0	3.60149	22.4422	CLDN22;CLDN6;CLDN10;CLDN8;MARVELD3;MICALL2;PARD6G;ESAM;GRHL2	0.169811	2.70625
KEGG_2021_Human	Long-term depression	7/60	0.00113871	0.0646219	0	0	4.79973	32.5319	PRKCG;GRIA1;GUCY1A2;GRID2;PRKCB;PRKG2;PRKG1	0.116667	2.94359			GO_Biological_Process_2021	negative regulation of programmed necrotic cell death	4/11	0.00206193	0.564357	0	0	10.0342	62.0528	PELI1;ARHGEF2;NUPR1;YBX3	0.363636	2.68573
GO_Biological_Process_2021	synaptic transmission, glutamatergic	4/18	0.00119786	0.305793	0	0	10.3458	69.5987	GRID2;GRID1;GRIK3;GRIK2	0.222222	2.92159			GO_Biological_Process_2021	hippo signaling	6/26	0.00222573	0.564357	0	0	5.27414	32.2127	YAP1;WWTR1;LATS2;DCHS1;TEAD2;STK3	0.230769	2.65253
GO_Biological_Process_2021	potassium ion transmembrane transport	11/139	0.00141992	0.305793	0	0	3.13445	20.5531	SLC9A2;KCNK9;KCND2;KCNB1;KCNQ2;KCNQ5;KCNN2;KCNAB2;KCNJ18;KCNJ2;KCNJ3	0.0791367	2.84774			GO_Biological_Process_2021	nervous system development	39/447	0.00227361	0.564357	0	0	1.69811	10.3354	SEMA5A;NOTCH2;TRIM71;NLGN3;YAP1;NRSN1;FUT10;CXCR4;CAPG;VLDLR;PTN;RAPGEFL1;NRGN;UGT8;EFNB3;CDH1;BTBD3;SPOCK2;ADAM23;IGF2BP1;ST8SIA4;IGF2BP2;SOX6;WWTR1;GDF11;EGR2;SEMA6A;PROP1;FN1;GFRA1;SDCBP2;GRHL2;B3GNT5;DCX;DCHS1;CNTN4;APBA2;CBLN1;NEUROG3	0.0872483	2.64328
Reactome_2016	Potassium Channels	9/99	0.00145193	0.426142	0	0	3.64079	23.7921	KCNK9;KCND2;KCNB1;KCNQ2;KCNQ5;KCNN2;KCNAB2;KCNJ2;KCNJ3	0.0909091	2.83805			GO_Biological_Process_2021	negative regulation of cardiac muscle cell differentiation	3/6	0.00278387	0.564357	0	0	17.5473	103.247	BMP2;FZD7;SOX6	0.5	2.55535
GO_Biological_Process_2021	regulation of Wnt signaling pathway, planar cell polarity pathway	3/9	0.00146382	0.305793	0	0	18.079	117.996	DAB2;RSPO3;DACT1	0.333333	2.83451			GO_Biological_Process_2021	axonogenesis	24/240	0.0027901	0.564357	0	0	1.96605	11.5637	NTNG1;SEMA5A;NOTCH2;NLGN3;NOTCH3;DRAXIN;NRP2;SEMA6A;SEMA3C;LAMA1;SEMA6D;GAB1;CXCR4;UNC5C;GFRA1;VLDLR;EFNA4;EFNB3;SLIT1;SLITRK5;CNTN4;SLIT2;EPHB4;FGFR2	0.1	2.55438
GO_Biological_Process_2021	potassium ion transport	10/122	0.00177582	0.305793	0	0	3.25313	20.6037	SLC9A2;KCNK9;KCND2;KCNB1;KCNQ2;KCNQ5;KCNN2;KCNAB2;KCNJ2;KCNJ3	0.0819672	2.7506			GO_Biological_Process_2021	peptidyl-tyrosine modification	9/56	0.0029098	0.564357	0	0	3.37107	19.6859	FGR;TPST2;ZAP70;TEC;SYK;FES;KIT;FGFR2;FGFR1	0.160714	2.53614
GO_Biological_Process_2021	positive regulation of endocytosis	6/48	0.00178276	0.305793	0	0	5.18478	32.8175	NLGN1;DAB2;TF;RAB31;CALY;SNCA	0.125	2.74891			GO_Biological_Process_2021	tight junction assembly	9/56	0.0029098	0.564357	0	0	3.37107	19.6859	CLDN22;CLDN6;CLDN10;CLDN8;MARVELD3;MICALL2;PARD6G;ESAM;GRHL2	0.160714	2.53614
KEGG_2021_Human	Protein digestion and absorption	9/103	0.00191485	0.0869343	0	0	3.48514	21.8104	SLC36A1;SLC6A19;CPB2;COL2A1;COL5A1;XPNPEP2;COL6A2;COL6A1;SLC8A2	0.0873786	2.71786			GO_Biological_Process_2021	carnitine metabolic process	4/12	0.00296139	0.564357	0	0	8.77948	51.115	CPT1A;SHMT1;CROT;CPT1C	0.333333	2.5285
GO_Biological_Process_2021	regulation of transmembrane transport	5/34	0.00206764	0.305793	0	0	6.25	38.6334	PRKCB;KCNJ18;KCNJ2;KCNJ3;SNCA	0.147059	2.68453			Reactome_2016	Synthesis, secretion, and inactivation of Glucagon-like Peptide-1 (GLP-1)	5/20	0.00358608	0.871997	0	0	5.85626	32.9748	DPP4;TCF7L2;CDX2;FFAR4;GNG13	0.25	2.44538
GO_Biological_Process_2021	long-term synaptic potentiation	4/21	0.00219706	0.305793	0	0	8.51879	52.1404	RGS14;TSHZ3;PLK2;SLC8A2	0.190476	2.65816			GO_Biological_Process_2021	muscle organ development	9/58	0.00371501	0.564357	0	0	3.23313	18.0906	CHODL;EVC;CTF1;EGR3;ITGA11;ITGA7;DMD;SOX6;HBEGF	0.155172	2.43004
GO_Biological_Process_2021	chloride transmembrane transport	6/50	0.00220604	0.305793	0	0	4.9486	30.2684	GABRB3;GLRA1;GLRA3;ANO5;GABRG2;ANO3	0.12	2.65639			GO_Biological_Process_2021	transition metal ion homeostasis	6/29	0.00399901	0.564357	0	0	4.58548	25.3197	BDH2;SLC11A1;SLC40A1;CYBRD1;CP;MT3	0.206897	2.39805
GO_Biological_Process_2021	regulation of trans-synaptic signaling	5/35	0.00235938	0.305793	0	0	6.04136	36.5463	NLGN1;GRID2;GRID1;GRIK3;GRIK2	0.142857	2.6272			GO_Biological_Process_2021	regulation of mesenchymal stem cell differentiation	3/7	0.00467647	0.564357	0	0	13.1598	70.605	LTBP3;SOX9;SOX6	0.428571	2.33008
GO_Biological_Process_2021	inhibitory synapse assembly	3/11	0.0027615	0.305793	0	0	13.5579	79.8826	GABRB3;FGF13;GABRG2	0.272727	2.55885			GO_Biological_Process_2021	negative regulation of cardiocyte differentiation	3/7	0.00467647	0.564357	0	0	13.1598	70.605	BMP2;FZD7;SOX6	0.428571	2.33008
GO_Biological_Process_2021	regulation of cysteine-type endopeptidase activity involved in apoptotic process	8/89	0.00282271	0.305793	0	0	3.59076	21.078	FABP1;NGFR;EPHA7;ACVR1C;CARD9;AVP;GAS6;SNCA	0.0898876	2.54933			GO_Biological_Process_2021	positive regulation of podosome assembly	3/7	0.00467647	0.564357	0	0	13.1598	70.605	FSCN1;CAPG;LCP1	0.428571	2.33008
Reactome_2016	Response to elevated platelet cytosolic Ca2+	9/110	0.00300256	0.460196	0	0	3.24243	18.8329	PRKCG;TF;CLEC3B;TGFB1;SERPINA1;PRKCB;PROS1;FLNA;GAS6	0.0818182	2.52251			GO_Biological_Process_2021	positive regulation of vascular associated smooth muscle cell differentiation	3/7	0.00467647	0.564357	0	0	13.1598	70.605	EFEMP2;KIT;ENG	0.428571	2.33008
GO_Biological_Process_2021	regulation of potassium ion transmembrane transport	6/54	0.00327465	0.305793	0	0	4.53528	25.9488	NOS1AP;FLNA;KCNN2;KCNAB2;KCNJ2;KCNJ3	0.111111	2.48483			GO_Biological_Process_2021	amino-acid betaine metabolic process	3/7	0.00467647	0.564357	0	0	13.1598	70.605	CPT1A;CROT;CPT1C	0.428571	2.33008
GO_Biological_Process_2021	cell morphogenesis involved in differentiation	7/72	0.00329163	0.305793	0	0	3.91121	22.3579	NTNG2;TMEFF2;LAMC3;RADIL;PARVB;BVES;SRCIN1	0.0972222	2.48259			GO_Biological_Process_2021	hyperosmotic response	3/7	0.00467647	0.564357	0	0	13.1598	70.605	ARHGEF2;YBX3;TLR3	0.428571	2.33008
GO_Biological_Process_2021	inorganic cation transmembrane transport	16/274	0.0033779	0.305793	0	0	2.26811	12.9067	SLC36A1;SLC6A19;SLC6A17;KCND2;KCNK9;KCNB1;KCNAB2;SLC8A2;SLC9A2;ASIC4;KCNQ2;KCNQ5;KCNN2;GAS6;ASIC2;KCNJ2	0.0583942	2.47135			GO_Biological_Process_2021	apical junction assembly	9/60	0.00468508	0.564357	0	0	3.10601	16.6587	CLDN22;CLDN6;CLDN10;CLDN8;MARVELD3;MICALL2;PARD6G;ESAM;GRHL2	0.15	2.32928
GO_Biological_Process_2021	ventricular septum development	5/38	0.00341377	0.305793	0	0	5.49129	31.1902	TGFBR3;HEYL;GATA4;SOX11;ZFPM2	0.131579	2.46677			Reactome_2016	HS-GAG biosynthesis	6/31	0.00565406	0.871997	0	0	4.2182	21.8308	NDST4;SDC3;GPC2;HS3ST5;GPC4;HS3ST1	0.193548	2.24764
GO_Biological_Process_2021	negative regulation of leukocyte apoptotic process	3/12	0.00360852	0.305793	0	0	12.0508	67.7792	CXCL12;IRF7;GAS6	0.25	2.44267			GO_Biological_Process_2021	negative regulation of multicellular organismal process	21/214	0.00613065	0.610787	0	0	1.92221	9.79262	BTN2A2;SLC11A1;TACSTD2;ATP2B4;STC1;HS3ST5;NR1D1;IL17RD;GRHL2;OVOL2;PROCR;BMP2;RGCC;NFIB;DDIT3;ALDH1A1;MARVELD3;FFAR4;SOX9;MAP2K6;NKX3-1	0.0981308	2.21249
GO_Biological_Process_2021	actin crosslink formation	3/12	0.00360852	0.305793	0	0	12.0508	67.7792	DPYSL3;GAS2;FLNA	0.25	2.44267			GO_Biological_Process_2021	negative regulation of chemotaxis	6/32	0.00664681	0.610787	0	0	4.05574	20.3339	SEMA5A;SEMA6A;SEMA3C;SEMA6D;SLIT2;AIF1	0.1875	2.17739
GO_Biological_Process_2021	catecholamine biosynthetic process	3/12	0.00360852	0.305793	0	0	12.0508	67.7792	TH;PAH;SNCA	0.25	2.44267			Reactome_2016	Incretin synthesis, secretion, and inactivation	5/23	0.00680362	0.871997	0	0	4.87944	24.3499	DPP4;TCF7L2;CDX2;FFAR4;GNG13	0.217391	2.16726
GO_Biological_Process_2021	extracellular matrix assembly	4/24	0.00365866	0.305793	0	0	7.23985	40.6203	NTNG2;MFAP4;TGFB1;GAS6	0.166667	2.43668			Reactome_2016	Laminin interactions	5/23	0.00680362	0.871997	0	0	4.87944	24.3499	COL18A1;LAMA1;ITGA7;LAMC2;NID1	0.217391	2.16726
GO_Biological_Process_2021	peripheral nervous system development	4/25	0.00426369	0.305793	0	0	6.89474	37.6289	GSTM3;ADGRB1;PMP22;ASIC2	0.16	2.37021			GO_Biological_Process_2021	integrin-mediated signaling pathway	10/75	0.00693181	0.610787	0	0	2.70832	13.4648	FGR;FYB2;COL3A1;TEC;SYK;ITGA11;ADAM11;FN1;ITGBL1;PTN	0.133333	2.15915
Reactome_2016	Nitric oxide stimulates guanylate cyclase	4/25	0.00426369	0.460196	0	0	6.89474	37.6289	GUCY1A2;PDE10A;PRKG2;PRKG1	0.16	2.37021			GO_Biological_Process_2021	G protein-coupled glutamate receptor signaling pathway	4/15	0.00717213	0.610787	0	0	6.38406	31.5217	HOMER1;GRM7;HOMER2;HOMER3	0.266667	2.14435
GO_Biological_Process_2021	regulation of short-term neuronal synaptic plasticity	3/13	0.00459758	0.305793	0	0	10.8452	58.3711	GRIK2;SHISA9;SLC8A2	0.230769	2.33747			GO_Biological_Process_2021	vascular associated smooth muscle cell differentiation	3/8	0.00718325	0.610787	0	0	10.5273	51.9627	EFEMP2;GATA6;ENG	0.375	2.14368
GO_Biological_Process_2021	response to iron ion	3/13	0.00459758	0.305793	0	0	10.8452	58.3711	TF;BMP6;SNCA	0.230769	2.33747			GO_Biological_Process_2021	neuron projection extension involved in neuron projection guidance	3/8	0.00718325	0.610787	0	0	10.5273	51.9627	NRP2;SLIT1;SLIT2	0.375	2.14368
GO_Biological_Process_2021	positive regulation of cation transmembrane transport	5/41	0.00477013	0.305793	0	0	5.03291	26.9028	NOS1AP;FLNA;KCNN2;KCNJ2;KCNJ3	0.121951	2.32147			GO_Biological_Process_2021	axon extension involved in axon guidance	3/8	0.00718325	0.610787	0	0	10.5273	51.9627	NRP2;SLIT1;SLIT2	0.375	2.14368
Reactome_2016	Ligand-gated ion channel transport	4/26	0.00493274	0.460196	0	0	6.58101	34.9574	GABRB3;GLRA1;GLRA3;GABRG2	0.153846	2.30691			GO_Biological_Process_2021	brown fat cell differentiation	3/8	0.00718325	0.610787	0	0	10.5273	51.9627	PRDM16;FFAR4;METRNL	0.375	2.14368
GO_Biological_Process_2021	positive regulation of filopodium assembly	4/26	0.00493274	0.305793	0	0	6.58101	34.9574	GPM6A;NLGN1;TENM2;DPYSL3	0.153846	2.30691			GO_Biological_Process_2021	regulation of extracellular matrix constituent secretion	3/8	0.00718325	0.610787	0	0	10.5273	51.9627	BMP2;RGCC;TNFRSF1A	0.375	2.14368
GO_Biological_Process_2021	heart development	11/164	0.00512287	0.305793	0	0	2.61889	13.8121	TGFBR3;CDKN1A;TGFB1;TH;OSR1;ID2;GATA4;ZFPM2;BVES;SGCZ;FBN1	0.0670732	2.29049			GO_Biological_Process_2021	regulation of microvillus organization	3/8	0.00718325	0.610787	0	0	10.5273	51.9627	ATP8B1;FSCN1;PLD1	0.375	2.14368
GO_Biological_Process_2021	negative regulation of protein catabolic process	5/42	0.00529669	0.305793	0	0	4.89663	25.6616	PRKCG;NELL1;ADGRB1;FLNA;SNCA	0.119048	2.276			GO_Biological_Process_2021	negative chemotaxis	6/33	0.00776006	0.640981	0	0	3.90532	18.975	SEMA6A;SEMA3C;SEMA6D;SLIT1;UNC5C;SLIT2	0.181818	2.11013
Reactome_2016	Neurotransmitter Receptor Binding And Downstream Transmission In The Postsynaptic Cell	10/142	0.0053172	0.460196	0	0	2.75738	14.4398	PRKCG;GRIA1;GABRB3;PRKCB;RASGRF1;GRIK3;GRIK2;GABRG2;KCNJ2;KCNJ3	0.0704225	2.27432			GO_Biological_Process_2021	axon extension	5/24	0.00821845	0.659987	0	0	4.62238	22.1938	NLGN3;SEMA5A;NRP2;SLIT1;SLIT2	0.208333	2.08521
GO_Biological_Process_2021	regulation of ion transport	7/79	0.00551387	0.305793	0	0	3.52968	18.356	SYT4;NKAIN4;TF;KCNJ18;KCNJ2;KCNJ3;SNCA	0.0886076	2.25854			GO_Biological_Process_2021	neuron cell-cell adhesion	4/16	0.00915953	0.711909	0	0	5.85175	27.462	NLGN3;CNTN4;NCAM2;ASTN2	0.25	2.03813
GO_Biological_Process_2021	positive regulation of SMAD protein signal transduction	3/14	0.00573501	0.305793	0	0	9.85874	50.8826	DAB2;TGFB1;BMP6	0.214286	2.24147			GO_Biological_Process_2021	regulation of small GTPase mediated signal transduction	15/141	0.0093575	0.711909	0	0	2.09874	9.80445	STARD8;ARHGEF19;ARHGAP29;ARHGAP28;ARHGAP12;ARHGAP10;DEPDC1B;TRIP10;SRGAP3;ARHGEF2;RHOV;SLIT2;SRGAP1;NGEF;ARHGEF5	0.106383	2.02884
Reactome_2016	Voltage gated Potassium channels	5/43	0.00586304	0.460196	0	0	4.76753	24.5007	KCND2;KCNB1;KCNQ2;KCNQ5;KCNAB2	0.116279	2.23188			GO_Biological_Process_2021	outflow tract septum morphogenesis	5/25	0.00982479	0.712108	0	0	4.39103	20.2991	NRP2;SEMA3C;GATA6;FGFR2;ENG	0.2	2.00768
GO_Biological_Process_2021	cardiac ventricle morphogenesis	5/44	0.00647072	0.305793	0	0	4.64504	23.4132	TGFBR3;HEYL;TGFB1;GATA4;SOX11	0.113636	2.18905			GO_Biological_Process_2021	negative regulation of necroptotic process	3/9	0.0103454	0.712108	0	0	8.77226	40.0999	PELI1;ARHGEF2;YBX3	0.333333	1.98525
GO_Biological_Process_2021	positive regulation of potassium ion transmembrane transport	5/44	0.00647072	0.305793	0	0	4.64504	23.4132	NOS1AP;FLNA;KCNN2;KCNJ2;KCNJ3	0.113636	2.18905			Reactome_2016	Inactivation of Cdc42 and Rac	3/9	0.0103454	0.999996	0	0	8.77226	40.0999	SLIT2;SRGAP3;SRGAP1	0.333333	1.98525
GO_Biological_Process_2021	ventricular septum morphogenesis	4/28	0.00647445	0.305793	0	0	6.03197	30.4005	TGFBR3;HEYL;SOX11;ZFPM2	0.142857	2.1888			GO_Biological_Process_2021	intestinal epithelial cell differentiation	3/9	0.0103454	0.712108	0	0	8.77226	40.0999	YAP1;CDX2;GATA6	0.333333	1.98525
GO_Biological_Process_2021	positive regulation of synapse assembly	4/28	0.00647445	0.305793	0	0	6.03197	30.4005	NLGN1;GRID2;EPHB1;VSTM5	0.142857	2.1888			GO_Biological_Process_2021	ketone body biosynthetic process	3/9	0.0103454	0.712108	0	0	8.77226	40.0999	ACSS3;BDH2;BDH1	0.333333	1.98525
GO_Biological_Process_2021	cell-cell adhesion via plasma-membrane adhesion molecules	11/170	0.00667269	0.305793	0	0	2.51928	12.6209	PTPRT;CDH4;TENM2;GRID2;NLGN1;DSCAM;SLITRK1;CLDN23;CDH9;CDH17;CDH7	0.0647059	2.1757			GO_Biological_Process_2021	positive regulation of smooth muscle cell migration	4/17	0.0114737	0.718421	0	0	5.40133	24.1315	DOCK5;DOCK4;AIF1;S100A11	0.235294	1.94029
Reactome_2016	Disinhibition of SNARE formation	2/5	0.00691795	0.460196	0	0	24.0643	119.687	PRKCG;PRKCB	0.4	2.16002			GO_Biological_Process_2021	epithelial cell morphogenesis	4/17	0.0114737	0.718421	0	0	5.40133	24.1315	COL18A1;CCDC88C;STC1;GRHL2	0.235294	1.94029
GO_Biological_Process_2021	atrial cardiac muscle cell membrane repolarization	2/5	0.00691795	0.305793	0	0	24.0643	119.687	KCNN2;KCNJ3	0.4	2.16002			GO_Biological_Process_2021	regulation of epithelial cell proliferation	11/93	0.0115443	0.718421	0	0	2.3616	10.5364	YAP1;ZBED9;TCF7L2;ZFP36;ANGPT1;MARVELD3;SOX9;NUPR1;NR1D1;FGFR2;NKX3-1	0.11828	1.93763
GO_Biological_Process_2021	catechol-containing compound biosynthetic process	2/5	0.00691795	0.305793	0	0	24.0643	119.687	TH;PAH	0.4	2.16002			KEGG_2021_Human	Maturity onset diabetes of the young	5/26	0.0116341	0.999994	0	0	4.18171	18.6246	NR5A2;ONECUT1;PAX4;MAFA;NEUROG3	0.192308	1.93427
GO_Biological_Process_2021	dopamine biosynthetic process	2/5	0.00691795	0.305793	0	0	24.0643	119.687	TH;SNCA	0.4	2.16002			GO_Biological_Process_2021	skeletal system development	16/158	0.011677	0.718421	0	0	1.98659	8.84059	GDF11;COL13A1;STC1;ETS2;RBP4;BMP2;MMP14;SNORC;EVC;ARSL;FRZB;SOX9;SOX6;PITX1;FGFR2;FGFR1	0.101266	1.93267
GO_Biological_Process_2021	embryonic skeletal joint morphogenesis	2/5	0.00691795	0.305793	0	0	24.0643	119.687	COL2A1;OSR1	0.4	2.16002			GO_Biological_Process_2021	peptidyl-tyrosine phosphorylation	9/69	0.0116796	0.718421	0	0	2.63885	11.7427	FGR;ZAP70;TEC;SYK;FES;KIT;AATK;FGFR2;FGFR1	0.130435	1.93257
GO_Biological_Process_2021	synaptic transmission, glycinergic	2/5	0.00691795	0.305793	0	0	24.0643	119.687	GLRA1;GLRA3	0.4	2.16002			GO_Biological_Process_2021	positive regulation of extracellular matrix organization	4/18	0.0141324	0.779796	0	0	5.01525	21.3614	BMP2;EFEMP2;RGCC;FSCN1	0.222222	1.84978
GO_Biological_Process_2021	membrane repolarization during atrial cardiac muscle cell action potential	2/5	0.00691795	0.305793	0	0	24.0643	119.687	KCNN2;KCNJ3	0.4	2.16002			GO_Biological_Process_2021	positive regulation of glial cell differentiation	4/18	0.0141324	0.779796	0	0	5.01525	21.3614	EGR2;BMP2;CXCR4;PTN	0.222222	1.84978
GO_Biological_Process_2021	negative regulation of calcium ion-dependent exocytosis	2/5	0.00691795	0.305793	0	0	24.0643	119.687	SYT4;ADRA2A	0.4	2.16002			GO_Biological_Process_2021	regulation of podosome assembly	3/10	0.0141918	0.779796	0	0	7.51869	31.9927	FSCN1;CAPG;LCP1	0.3	1.84796
GO_Biological_Process_2021	positive regulation of long-term synaptic depression	2/5	0.00691795	0.305793	0	0	24.0643	119.687	GRID2;KCNB1	0.4	2.16002			GO_Biological_Process_2021	regulation of store-operated calcium entry	3/10	0.0141918	0.779796	0	0	7.51869	31.9927	HOMER1;HOMER2;HOMER3	0.3	1.84796
GO_Biological_Process_2021	negative regulation of cellular component movement	3/15	0.00702629	0.305793	0	0	9.03671	44.8049	TGFBR3;FRMD5;SPOCK3	0.2	2.15327			GO_Biological_Process_2021	regulation of epithelial cell apoptotic process	3/10	0.0141918	0.779796	0	0	7.51869	31.9927	YAP1;ZFP36;NUPR1	0.3	1.84796
GO_Biological_Process_2021	membrane repolarization during cardiac muscle cell action potential	3/15	0.00702629	0.305793	0	0	9.03671	44.8049	KCNN2;KCNJ2;KCNJ3	0.2	2.15327			GO_Biological_Process_2021	epithelium development	13/122	0.014711	0.779796	0	0	2.10056	8.86259	TRIM71;ERRFI1;EHF;CPT1A;GATA6;GRHL2;CNN3;LGALS3;BMP2;BDH2;TST;SOX9;FGFR2	0.106557	1.83236
GO_Biological_Process_2021	neuropeptide signaling pathway	6/63	0.00703034	0.305793	0	0	3.81741	18.9249	GLRA1;CYSLTR2;GLRA3;NXPH2;OPRK1;SORCS2	0.0952381	2.15302			GO_Biological_Process_2021	positive regulation of epithelial cell proliferation	13/123	0.0156638	0.779796	0	0	2.08135	8.65092	SEMA5A;NOTCH2;YAP1;ZBED9;TCF7L2;NRP2;EGR3;FZD7;PTN;BMP2;JAML;SOX9;FGFR2	0.105691	1.8051
GO_Biological_Process_2021	positive regulation of nervous system development	5/45	0.00712121	0.305793	0	0	4.52868	22.3929	NLGN1;GRID2;RGS14;SOX11;EPHB1	0.111111	2.14745			GO_Biological_Process_2021	negative regulation of axonogenesis	5/28	0.0159042	0.779796	0	0	3.81768	15.8097	LINGO1;MAG;EFNB3;TRIM46;MT3	0.178571	1.79849
GO_Biological_Process_2021	inorganic anion transmembrane transport	6/65	0.00817031	0.340704	0	0	3.68763	17.7273	GABRB3;GLRA1;GLRA3;ANO5;GABRG2;ANO3	0.0923077	2.08776			Reactome_2016	Cell-cell junction organization	8/61	0.0164401	0.999996	0	0	2.65396	10.9026	CLDN22;CLDN6;CLDN10;JUP;CDH1;CLDN8;CDH12;PARD6G	0.131148	1.7841
GO_Biological_Process_2021	response to alcohol	4/30	0.00830573	0.340704	0	0	5.5674	26.6723	TGFBR3;GLRA1;TGFB1;TH	0.133333	2.08062			Reactome_2016	Collagen degradation	6/39	0.0173867	0.999996	0	0	3.19425	12.9432	COL18A1;MMP11;MMP14;COL13A1;COL25A1;MMP2	0.153846	1.75978
GO_Biological_Process_2021	neural tube development	3/16	0.00847612	0.340704	0	0	8.34115	39.7915	TGFB1;SOX11;DACT1	0.1875	2.0718			Reactome_2016	Cell junction organization	10/86	0.0174451	0.999996	0	0	2.31498	9.37265	CLDN22;CLDN6;CLDN10;JUP;CDH1;CLDN8;PXN;CDH12;PARD6G;LAMC2	0.116279	1.75833
GO_Biological_Process_2021	regulation of synapse assembly	5/47	0.00855648	0.340704	0	0	4.31259	20.5325	NLGN1;GRID2;SLITRK1;EPHB1;SNCA	0.106383	2.0677			GO_Biological_Process_2021	actin filament organization	15/152	0.0177552	0.779796	0	0	1.9291	7.77637	SVIL;CAPG;RND3;AIF1;ARHGAP12;RND1;SAMD14;EFS;ACTC1;KASH5;CDC42EP2;VILL;ARHGEF2;LCP1;GAS2L2	0.0986842	1.75068
Reactome_2016	Cell junction organization	7/86	0.00870536	0.460196	0	0	3.21576	15.255	CDH4;CLDN23;FLNA;PARVB;CDH9;CDH17;CDH7	0.0813953	2.06021			GO_Biological_Process_2021	ketone body metabolic process	3/11	0.0187405	0.779796	0	0	6.5785	26.1632	ACSS3;BDH2;BDH1	0.272727	1.72722
GO_Biological_Process_2021	embryonic skeletal system morphogenesis	4/31	0.00933629	0.343383	0	0	5.36092	25.0561	COL2A1;OSR1;HOXB4;SOX11	0.129032	2.02983			GO_Biological_Process_2021	positive regulation of transcription from RNA polymerase II promoter in response to endoplasmic reticulum stress	3/11	0.0187405	0.779796	0	0	6.5785	26.1632	CEBPB;DDIT3;ATF3	0.272727	1.72722
GO_Biological_Process_2021	regulation of transmembrane receptor protein serine/threonine kinase signaling pathway	4/31	0.00933629	0.343383	0	0	5.36092	25.0561	TGFBR3;TGFB1;FST;SOX11	0.129032	2.02983			GO_Biological_Process_2021	cell differentiation in spinal cord	3/11	0.0187405	0.779796	0	0	6.5785	26.1632	DRAXIN;SOX13;SOX6	0.272727	1.72722
Reactome_2016	Adherens junctions interactions	4/31	0.00933629	0.460196	0	0	5.36092	25.0561	CDH4;CDH9;CDH17;CDH7	0.129032	2.02983			GO_Biological_Process_2021	cyclooxygenase pathway	3/11	0.0187405	0.779796	0	0	6.5785	26.1632	TBXAS1;PTGDS;PTGS1	0.272727	1.72722
Reactome_2016	HS-GAG biosynthesis	4/31	0.00933629	0.460196	0	0	5.36092	25.0561	HS3ST3B1;GPC5;HS6ST3;HS3ST2	0.129032	2.02983			GO_Biological_Process_2021	columnar/cuboidal epithelial cell differentiation	3/11	0.0187405	0.779796	0	0	6.5785	26.1632	CDX2;GATA6;ROS1	0.272727	1.72722
KEGG_2021_Human	Dopaminergic synapse	9/132	0.00977915	0.295202	0	0	2.65945	12.3066	PRKCG;GRIA1;CREB3L3;CALY;TH;PPP2R2C;PRKCB;SLC18A2;KCNJ3	0.0681818	2.0097			GO_Biological_Process_2021	regulation of cardiac muscle cell differentiation	3/11	0.0187405	0.779796	0	0	6.5785	26.1632	BMP2;FZD7;SOX6	0.272727	1.72722
GO_Biological_Process_2021	positive regulation of regulated secretory pathway	3/17	0.0100885	0.343383	0	0	7.74495	35.5986	SYT4;NLGN1;KCNB1	0.176471	1.99617			GO_Biological_Process_2021	positive regulation of fat cell differentiation	7/51	0.0191534	0.779796	0	0	2.79594	11.0587	ZFP36;CEBPB;BMP2;FRZB;SOX13;METRNL;TRPM4	0.137255	1.71775
Reactome_2016	Trafficking of GluR2-containing AMPA receptors	3/17	0.0100885	0.460196	0	0	7.74495	35.5986	PRKCG;GRIA1;PRKCB	0.176471	1.99617			GO_Biological_Process_2021	regulation of canonical Wnt signaling pathway	22/253	0.0192939	0.779796	0	0	1.68065	6.63515	SEMA5A;WWTR1;PTPRU;DRAXIN;TCF7L2;JUP;FZD7;TPBG;FZD6;SOX13;KREMEN1;STK3;GPRC5B;BMP2;LATS2;PTK7;FRZB;DDIT3;CCDC88C;SOX9;FGFR2;TRPM4	0.0869565	1.71458
GO_Biological_Process_2021	positive regulation of Wnt signaling pathway, planar cell polarity pathway	2/6	0.0101917	0.343383	0	0	18.0473	82.7682	DAB2;RSPO3	0.333333	1.99175			GO_Biological_Process_2021	negative regulation of cell motility	12/114	0.020325	0.779796	0	0	2.07087	8.06792	PTPRU;CLIC4;CDH1;STK26;TACSTD2;STC1;SRGAP3;PTPRK;SLIT2;SRGAP1;ALOX15B;ENG	0.105263	1.69197
Reactome_2016	Vasopressin-like receptors	2/6	0.0101917	0.460196	0	0	18.0473	82.7682	OXT;AVP	0.333333	1.99175			GO_Biological_Process_2021	calcium-independent cell-cell adhesion via plasma membrane cell-adhesion molecules	4/20	0.0205421	0.779796	0	0	4.38788	17.0482	CLDN22;CLDN6;CLDN10;CLDN8	0.2	1.68736
GO_Biological_Process_2021	heparan sulfate proteoglycan biosynthetic process, enzymatic modification	2/6	0.0101917	0.343383	0	0	18.0473	82.7682	HS3ST3B1;HS6ST3	0.333333	1.99175			GO_Biological_Process_2021	negative regulation of axon extension involved in axon guidance	4/20	0.0205421	0.779796	0	0	4.38788	17.0482	SEMA5A;SEMA6A;SEMA3C;SEMA6D	0.2	1.68736
GO_Biological_Process_2021	regulation of saliva secretion	2/6	0.0101917	0.343383	0	0	18.0473	82.7682	OPRK1;NEUROG1	0.333333	1.99175			Reactome_2016	Signaling by Hippo	4/20	0.0205421	0.999996	0	0	4.38788	17.0482	YAP1;WWTR1;LATS2;STK3	0.2	1.68736
GO_Biological_Process_2021	negative regulation of relaxation of muscle	2/6	0.0101917	0.343383	0	0	18.0473	82.7682	PDE4B;NEUROG1	0.333333	1.99175			GO_Biological_Process_2021	regulation of cation transmembrane transport	5/30	0.0211065	0.779796	0	0	3.5119	13.5495	BPIFA1;HOMER1;KCNIP1;KCNIP3;ATP2B4	0.166667	1.67558
GO_Biological_Process_2021	negative regulation of cellular extravasation	2/6	0.0101917	0.343383	0	0	18.0473	82.7682	PTGER4;CXCL12	0.333333	1.99175			Reactome_2016	Molecules associated with elastic fibres	5/30	0.0211065	0.999996	0	0	3.5119	13.5495	EFEMP2;BMP2;LTBP4;LTBP3;FBLN2	0.166667	1.67558
GO_Biological_Process_2021	embryonic skeletal joint development	2/6	0.0101917	0.343383	0	0	18.0473	82.7682	COL2A1;OSR1	0.333333	1.99175			Reactome_2016	Tight junction interactions	5/30	0.0211065	0.999996	0	0	3.5119	13.5495	CLDN22;CLDN6;CLDN10;CLDN8;PARD6G	0.166667	1.67558
GO_Biological_Process_2021	cellular response to iron ion	2/6	0.0101917	0.343383	0	0	18.0473	82.7682	TF;BMP6	0.333333	1.99175			Reactome_2016	Elastic fibre formation	6/41	0.0218834	0.999996	0	0	3.0114	11.5097	FBN3;EFEMP2;BMP2;LTBP4;LTBP3;FBLN2	0.146341	1.65988
KEGG_2021_Human	Amphetamine addiction	6/69	0.0108386	0.295202	0	0	3.45278	15.6226	PRKCG;GRIA1;CREB3L3;TH;PRKCB;SLC18A2	0.0869565	1.96503			GO_Biological_Process_2021	cell-cell adhesion via plasma-membrane adhesion molecules	16/170	0.0220061	0.779796	0	0	1.83062	6.98645	NTNG1;UMOD;CLDN6;CLDN22;CLDN10;MAG;JAML;CDH1;CLDN8;CDH12;DCHS1;HMCN1;CNTN4;GPC4;CBLN1;NECTIN1	0.0941176	1.65746
KEGG_2021_Human	Morphine addiction	7/91	0.0116974	0.295202	0	0	3.02356	13.45	GABRB3;PRKCG;PDE10A;PRKCB;PDE4B;GABRG2;KCNJ3	0.0769231	1.93191			Reactome_2016	Defective EXT1 causes exostoses 1, TRPS2 and CHDS	3/12	0.0240002	0.999996	0	0	5.84725	21.8084	SDC3;GPC2;GPC4	0.25	1.61979
KEGG_2021_Human	Cholinergic synapse	8/113	0.011704	0.295202	0	0	2.76659	12.3053	PRKCG;CREB3L3;PRKCB;KCNQ2;KCNQ5;KCNJ18;KCNJ2;KCNJ3	0.0707965	1.93166			Reactome_2016	Defective EXT2 causes exostoses 2	3/12	0.0240002	0.999996	0	0	5.84725	21.8084	SDC3;GPC2;GPC4	0.25	1.61979
Reactome_2016	cGMP effects	3/18	0.0118666	0.492279	0	0	7.22825	32.0503	PDE10A;PRKG2;PRKG1	0.166667	1.92567			GO_Biological_Process_2021	negative regulation of calcineurin-NFAT signaling cascade	3/12	0.0240002	0.779796	0	0	5.84725	21.8084	HOMER2;ATP2B4;HOMER3	0.25	1.61979
GO_Biological_Process_2021	negative regulation of cell motility	8/114	0.0122995	0.38045	0	0	2.74034	12.0526	PTPRT;NGFR;KANK1;FRMD5;TMEFF2;DPYSL3;SPOCK3;LDLRAD4	0.0701754	1.91011			GO_Biological_Process_2021	actin crosslink formation	3/12	0.0240002	0.779796	0	0	5.84725	21.8084	LCP1;AIF1;GAS2L2	0.25	1.61979
Reactome_2016	Transmission across Chemical Synapses	12/211	0.0125795	0.492279	0	0	2.19548	9.60671	PRKCG;GABRB3;GRIA1;PRKCB;GAD1;RASGRF1;GRIK3;GRIK2;GABRG2;SLC18A2;KCNJ2;KCNJ3	0.056872	1.90034			GO_Biological_Process_2021	negative regulation of calcineurin-mediated signaling	3/12	0.0240002	0.779796	0	0	5.84725	21.8084	HOMER2;ATP2B4;HOMER3	0.25	1.61979
GO_Biological_Process_2021	ventricular cardiac muscle tissue morphogenesis	4/34	0.0129149	0.38045	0	0	4.82408	20.9817	TGFBR3;TGFB1;NRG1;ZFPM2	0.117647	1.88891			GO_Biological_Process_2021	negative regulation of vascular permeability	3/12	0.0240002	0.779796	0	0	5.84725	21.8084	ANGPT1;PDE3A;SLIT2	0.25	1.61979
GO_Biological_Process_2021	cell junction organization	6/72	0.0132073	0.38045	0	0	3.29533	14.2588	TGFB1;FLNA;SNCB;ELFN1;SLC8A2;SNCA	0.0833333	1.87919			GO_Biological_Process_2021	positive regulation of vascular permeability	3/12	0.0240002	0.779796	0	0	5.84725	21.8084	ANGPT1;PDE3A;TJP3	0.25	1.61979
GO_Biological_Process_2021	mesenchymal cell development	3/19	0.0138131	0.38045	0	0	6.77614	29.0163	HEYL;NRG1;SOX11	0.157895	1.85971			GO_Biological_Process_2021	negative regulation of cell migration	14/144	0.0241191	0.779796	0	0	1.89637	7.06352	PTPRU;CLIC4;TACSTD2;STC1;PTPRK;ALOX15B;COL3A1;CDH1;STK26;MARVELD3;SRGAP3;SLIT2;SRGAP1;ENG	0.0972222	1.61764
GO_Biological_Process_2021	aspartate family amino acid metabolic process	3/19	0.0138131	0.38045	0	0	6.77614	29.0163	ASPG;GADL1;ASS1	0.157895	1.85971			GO_Biological_Process_2021	epithelial cell development	4/21	0.0243166	0.779796	0	0	4.12955	15.3479	TMEM79;GRHL2;ROS1;EXPH5	0.190476	1.6141
GO_Biological_Process_2021	cellular amino acid biosynthetic process	2/7	0.0140144	0.38045	0	0	14.4371	61.6128	GAD1;PAH	0.285714	1.85343			GO_Biological_Process_2021	heterophilic cell-cell adhesion via plasma membrane cell adhesion molecules	6/42	0.0244007	0.779796	0	0	2.9276	10.8706	JAML;UMOD;DCHS1;HMCN1;CBLN1;NECTIN1	0.142857	1.6126
GO_Biological_Process_2021	regulation of norepinephrine secretion	2/7	0.0140144	0.38045	0	0	14.4371	61.6128	KCNB1;ADRA2A	0.285714	1.85343			GO_Biological_Process_2021	positive regulation of cell cycle	8/66	0.0253699	0.779796	0	0	2.42453	8.90818	ZBED9;CCND2;RGCC;CCND1;NUPR1;MEIS2;FGFR2;NKX3-1	0.121212	1.59568
GO_Biological_Process_2021	regulation of muscle organ development	2/7	0.0140144	0.38045	0	0	14.4371	61.6128	TGFB1;NEUROG1	0.285714	1.85343			GO_Biological_Process_2021	positive regulation of low-density lipoprotein receptor activity	2/5	0.026164	0.779796	0	0	11.6874	42.5814	ANXA2;FGF21	0.4	1.5823
GO_Biological_Process_2021	cellular response to histamine	2/7	0.0140144	0.38045	0	0	14.4371	61.6128	GABRB3;GABRG2	0.285714	1.85343			GO_Biological_Process_2021	regulation of cellular response to vascular endothelial growth factor stimulus	2/5	0.026164	0.779796	0	0	11.6874	42.5814	ATP2B4;TSPAN12	0.4	1.5823
GO_Biological_Process_2021	synaptic transmission, dopaminergic	2/7	0.0140144	0.38045	0	0	14.4371	61.6128	TH;SNCA	0.285714	1.85343			GO_Biological_Process_2021	response to indole-3-methanol	2/5	0.026164	0.779796	0	0	11.6874	42.5814	JUP;CDH1	0.4	1.5823
GO_Biological_Process_2021	negative regulation of dendritic cell apoptotic process	2/7	0.0140144	0.38045	0	0	14.4371	61.6128	CXCL12;GAS6	0.285714	1.85343			GO_Biological_Process_2021	hemoglobin metabolic process	2/5	0.026164	0.779796	0	0	11.6874	42.5814	ALAS2;AHSP	0.4	1.5823
GO_Biological_Process_2021	negative regulation of catecholamine secretion	2/7	0.0140144	0.38045	0	0	14.4371	61.6128	SYT4;ADRA2A	0.285714	1.85343			GO_Biological_Process_2021	regulation of vascular associated smooth muscle contraction	2/5	0.026164	0.779796	0	0	11.6874	42.5814	DOCK5;DOCK4	0.4	1.5823
GO_Biological_Process_2021	citrulline metabolic process	2/7	0.0140144	0.38045	0	0	14.4371	61.6128	DDAH1;ASS1	0.285714	1.85343			GO_Biological_Process_2021	cellular response to indole-3-methanol	2/5	0.026164	0.779796	0	0	11.6874	42.5814	JUP;CDH1	0.4	1.5823
GO_Biological_Process_2021	positive regulation of integrin-mediated signaling pathway	2/7	0.0140144	0.38045	0	0	14.4371	61.6128	LOXL3;FLNA	0.285714	1.85343			GO_Biological_Process_2021	cellular response to heparin	2/5	0.026164	0.779796	0	0	11.6874	42.5814	SLIT2;SOX9	0.4	1.5823
GO_Biological_Process_2021	negative regulation of cysteine-type endopeptidase activity	5/53	0.0140365	0.38045	0	0	3.77235	16.0932	FABP1;NGFR;AVP;GAS6;SNCA	0.0943396	1.85274			GO_Biological_Process_2021	negative regulation of blood coagulation, intrinsic pathway	2/5	0.026164	0.779796	0	0	11.6874	42.5814	F8;SERPING1	0.4	1.5823
GO_Biological_Process_2021	positive regulation of synaptic transmission	6/73	0.0140715	0.38045	0	0	3.24598	13.8396	NLGN1;RGS14;TSHZ3;PLK2;GRIK2;SLC8A2	0.0821918	1.85166			GO_Biological_Process_2021	salivary gland morphogenesis	2/5	0.026164	0.779796	0	0	11.6874	42.5814	FGFR2;NKX3-1	0.4	1.5823
GO_Biological_Process_2021	embryonic skeletal system development	4/35	0.014277	0.381299	0	0	4.66823	19.8358	KIAA1217;OSR1;HOXB4;SOX11	0.114286	1.84536			GO_Biological_Process_2021	regulation of circadian sleep/wake cycle	2/5	0.026164	0.779796	0	0	11.6874	42.5814	NR1D1;PTGDS	0.4	1.5823
Reactome_2016	Assembly of collagen fibrils and other multimeric structures	5/54	0.0151346	0.555251	0	0	3.69517	15.4856	COL2A1;COL5A1;COL6A2;COL6A1;LOXL3	0.0925926	1.82003			GO_Biological_Process_2021	positive regulation of mast cell activation involved in immune response	2/5	0.026164	0.779796	0	0	11.6874	42.5814	FGR;SYK	0.4	1.5823
GO_Biological_Process_2021	positive regulation of bone mineralization	4/36	0.0157266	0.408087	0	0	4.52211	18.7776	NELL1;TGFB1;OSR1;BMP6	0.111111	1.80337			GO_Biological_Process_2021	negative regulation of insulin-like growth factor receptor signaling pathway	2/5	0.026164	0.779796	0	0	11.6874	42.5814	BMP2;NKX3-1	0.4	1.5823
GO_Biological_Process_2021	calcium-dependent cell-cell adhesion via plasma membrane cell adhesion molecules	4/36	0.0157266	0.408087	0	0	4.52211	18.7776	NLGN1;CDH9;CDH17;CDH7	0.111111	1.80337			GO_Biological_Process_2021	negative regulation of smooth muscle contraction	2/5	0.026164	0.779796	0	0	11.6874	42.5814	DOCK5;DOCK4	0.4	1.5823
GO_Biological_Process_2021	regulation of cell migration	19/408	0.015839	0.408087	0	0	1.78437	7.3967	PTPRT;NGFR;KANK1;NTNG2;CEMIP;TGFB1;SEMA3D;LDLRAD4;SRCIN1;ADRA2A;DOCK10;TMEFF2;FRMD5;DAB2;CXCL12;DPYSL3;FLNA;GTSE1;PLXNA4	0.0465686	1.80027			GO_Biological_Process_2021	positive regulation of AMPA receptor activity	2/5	0.026164	0.779796	0	0	11.6874	42.5814	NLGN3;ARC	0.4	1.5823
GO_Biological_Process_2021	negative regulation of cysteine-type endopeptidase activity involved in apoptotic process	5/55	0.0162887	0.413802	0	0	3.62108	14.909	FABP1;NGFR;AVP;GAS6;SNCA	0.0909091	1.78811			GO_Biological_Process_2021	regulation of blood coagulation, intrinsic pathway	2/5	0.026164	0.779796	0	0	11.6874	42.5814	F8;SERPING1	0.4	1.5823
GO_Biological_Process_2021	chloride transport	6/76	0.0168988	0.413802	0	0	3.10638	12.6756	GABRB3;GLRA1;GLRA3;ANO5;GABRG2;ANO3	0.0789474	1.77214			GO_Biological_Process_2021	positive regulation of blood-brain barrier permeability	2/5	0.026164	0.779796	0	0	11.6874	42.5814	ANGPT1;TJP3	0.4	1.5823
GO_Biological_Process_2021	glutamate receptor signaling pathway	4/37	0.0172655	0.413802	0	0	4.38485	17.7983	GRID2;KCNB1;GRIK3;GRIK2	0.108108	1.76282			Reactome_2016	Regulation of gene expression in endocrine-committed (NEUROG3+) progenitor cells	2/5	0.026164	0.999996	0	0	11.6874	42.5814	PAX4;NEUROG3	0.4	1.5823
GO_Biological_Process_2021	inorganic cation import across plasma membrane	6/77	0.0179221	0.413802	0	0	3.06247	12.3164	SLC9A2;KCNK9;KCNJ18;KCNJ2;SLC8A2;KCNJ3	0.0779221	1.74661			GO_Biological_Process_2021	positive regulation of protein localization to cell cortex	2/5	0.026164	0.779796	0	0	11.6874	42.5814	GPSM2;EPB41	0.4	1.5823
GO_Biological_Process_2021	regulation of cardiac muscle cell proliferation	3/21	0.0182189	0.413802	0	0	6.02261	24.1223	TGFBR3;ZFPM2;TP73	0.142857	1.73948			GO_Biological_Process_2021	Toll signaling pathway	2/5	0.026164	0.779796	0	0	11.6874	42.5814	PALM3;PELI1	0.4	1.5823
GO_Biological_Process_2021	negative regulation of protein localization to cell periphery	3/21	0.0182189	0.413802	0	0	6.02261	24.1223	DAB2;PID1;TGFB1	0.142857	1.73948			GO_Biological_Process_2021	positive regulation of myoblast proliferation	2/5	0.026164	0.779796	0	0	11.6874	42.5814	GATA6;MEIS2	0.4	1.5823
GO_Biological_Process_2021	negative regulation of protein localization to plasma membrane	3/21	0.0182189	0.413802	0	0	6.02261	24.1223	DAB2;PID1;TGFB1	0.142857	1.73948			Reactome_2016	Regulation of beta-cell development	5/32	0.0273061	0.999996	0	0	3.25141	11.7072	NR5A2;ONECUT1;PAX4;MAFA;NEUROG3	0.15625	1.56374
GO_Biological_Process_2021	excitatory synapse assembly	2/8	0.0183539	0.413802	0	0	12.0303	48.0961	GRID2;NLGN1	0.25	1.73627			Reactome_2016	Activation of Matrix Metalloproteinases	5/32	0.0273061	0.999996	0	0	3.25141	11.7072	COL18A1;MMP11;MMP14;MMP2;MMP17	0.15625	1.56374
GO_Biological_Process_2021	cellular response to UV-B	2/8	0.0183539	0.413802	0	0	12.0303	48.0961	MFAP4;CDKN1A	0.25	1.73627			KEGG_2021_Human	Parathyroid hormone synthesis, secretion and action	11/106	0.0281138	0.999994	0	0	2.03703	7.27524	CASR;MMP14;CREB3L4;MMP17;ADCY4;ITPR2;ARRB1;PLD1;FGFR1;CREB5;HBEGF	0.103774	1.55108
GO_Biological_Process_2021	cellular response to epinephrine stimulus	2/8	0.0183539	0.413802	0	0	12.0303	48.0961	PDE4B;SNCA	0.25	1.73627			GO_Biological_Process_2021	negative regulation of cell cycle	9/80	0.0283665	0.836813	0	0	2.22872	7.9399	NPPC;BMP2;LATS2;TFAP4;MCIDAS;PTPRK;NUPR1;ALOX15B;NKX3-1	0.1125	1.54719
GO_Biological_Process_2021	response to epinephrine	2/8	0.0183539	0.413802	0	0	12.0303	48.0961	PDE4B;SNCA	0.25	1.73627			GO_Biological_Process_2021	actin filament bundle assembly	5/33	0.0307965	0.886249	0	0	3.13512	10.9113	FSCN1;FSCN3;FSCN2;LCP1;AIF1	0.151515	1.5115
GO_Biological_Process_2021	negative regulation of regulated secretory pathway	2/8	0.0183539	0.413802	0	0	12.0303	48.0961	SYT4;ADRA2A	0.25	1.73627			GO_Biological_Process_2021	actin filament bundle organization	5/33	0.0307965	0.886249	0	0	3.13512	10.9113	FSCN1;FSCN3;FSCN2;LCP1;AIF1	0.151515	1.5115
GO_Biological_Process_2021	carboxylic acid transport	5/57	0.0187692	0.413802	0	0	3.48145	13.8406	SLC36A1;SLC6A17;SLC16A6;SLC16A9;SLC16A3	0.0877193	1.72655			KEGG_2021_Human	Hippo signaling pathway	15/163	0.030973	0.999994	0	0	1.78468	6.20111	YAP1;WWTR1;TCF7L2;FZD7;FZD6;PARD6G;STK3;BMP2;CCND2;LATS2;CCND1;CDH1;RASSF4;DCHS1;TEAD2	0.0920245	1.50902
GO_Biological_Process_2021	regulation of transforming growth factor beta receptor signaling pathway	7/100	0.0188472	0.413802	0	0	2.72969	10.8407	TGFBR3;DAB2;CDKN2B;TGFB1;PEG10;SOX11;LDLRAD4	0.07	1.72475			Reactome_2016	Rho GTPase cycle	12/122	0.0324299	0.999996	0	0	1.91945	6.58117	ARHGAP10;DEPDC1B;STARD8;TRIP10;ARHGAP29;ARHGAP28;SRGAP3;RHOV;ARHGEF2;SRGAP1;NGEF;ARHGAP12	0.0983607	1.48905
GO_Biological_Process_2021	positive regulation of signaling	4/38	0.0188951	0.413802	0	0	4.25567	16.8901	SOX11;GRIK2;BVES;SNCA	0.105263	1.72365			GO_Biological_Process_2021	negative regulation of canonical Wnt signaling pathway	15/165	0.0339959	0.886249	0	0	1.76069	5.95381	WWTR1;DRAXIN;PTPRU;TCF7L2;TPBG;FZD6;SOX13;KREMEN1;STK3;BMP2;LATS2;FRZB;DDIT3;CCDC88C;SOX9	0.0909091	1.46857
GO_Biological_Process_2021	nervous system development	20/447	0.0199618	0.431441	0	0	1.711	6.69673	GPM6A;NLGN1;TGFB1;DSCAM;ZBTB16;NAB2;NRG1;DCLK1;NELL1;ACVR1C;SLITRK1;ADGRB1;KCNQ2;PMP22;PCDH1;ASIC2;FGF13;EPHB1;NEUROG1;DACT1	0.0447427	1.6998			GO_Biological_Process_2021	regulation of calcium ion transport	7/58	0.0360424	0.886249	0	0	2.41129	8.01286	CASR;HOMER1;EPB41;HOMER2;STC1;PACSIN3;HOMER3	0.12069	1.44319
GO_Biological_Process_2021	regulation of neuron differentiation	6/79	0.0200945	0.431441	0	0	2.97826	11.637	HEYL;NLGN1;BRINP1;ID2;SOX11;NEUROG1	0.0759494	1.69692			GO_Biological_Process_2021	negative regulation of neuron projection development	7/58	0.0360424	0.886249	0	0	2.41129	8.01286	LINGO1;MAG;EFNB3;BCL11A;ACP4;MT3;NGEF	0.12069	1.44319
GO_Biological_Process_2021	cell junction assembly	7/102	0.0207777	0.441777	0	0	2.67195	10.3508	GPM6A;NLGN1;DSCAM;SLITRK1;FLNA;CDH9;CDH7	0.0686275	1.6824			GO_Biological_Process_2021	manganese ion transport	3/14	0.0366478	0.886249	0	0	4.78361	15.8165	TRPC4;SLC11A1;ATP2C2	0.214286	1.43595
GO_Biological_Process_2021	circulatory system development	8/126	0.0212819	0.443879	0	0	2.46014	9.47129	CDKN1A;TGFB1;TH;OSR1;ID2;ZFPM2;BVES;FBN1	0.0634921	1.67199			GO_Biological_Process_2021	immune response-regulating cell surface receptor signaling pathway	3/14	0.0366478	0.886249	0	0	4.78361	15.8165	FGR;CD40;KIT	0.214286	1.43595
GO_Biological_Process_2021	synapse organization	8/126	0.0212819	0.443879	0	0	2.46014	9.47129	GPM6A;NLGN1;DSCAM;SLITRK1;SNCB;ELFN1;SLC8A2;SNCA	0.0634921	1.67199			Reactome_2016	Synthesis of Prostaglandins (PG) and Thromboxanes (TX)	3/14	0.0366478	0.999996	0	0	4.78361	15.8165	TBXAS1;PTGDS;PTGS1	0.214286	1.43595
GO_Biological_Process_2021	embryonic digestive tract morphogenesis	2/9	0.0231797	0.468449	0	0	10.3112	38.8161	ID2;SOX11	0.222222	1.63489			GO_Biological_Process_2021	regulation of cAMP-dependent protein kinase activity	3/14	0.0366478	0.886249	0	0	4.78361	15.8165	PKIB;PRKAR2B;ATP2B4	0.214286	1.43595
GO_Biological_Process_2021	negative regulation of biomineralization	2/9	0.0231797	0.468449	0	0	10.3112	38.8161	TGFB1;GAS6	0.222222	1.63489			GO_Biological_Process_2021	transmembrane receptor protein tyrosine phosphatase signaling pathway	2/6	0.0378541	0.886249	0	0	8.76506	28.6969	PTPRU;PTN	0.333333	1.42189
Reactome_2016	Transport of gamma-carboxylated protein precursors from the endoplasmic reticulum to the Golgi apparatus	2/9	0.0231797	0.596692	0	0	10.3112	38.8161	PROS1;GAS6	0.222222	1.63489			GO_Biological_Process_2021	response to heparin	2/6	0.0378541	0.886249	0	0	8.76506	28.6969	SLIT2;SOX9	0.333333	1.42189
GO_Biological_Process_2021	regulation of SMAD protein signal transduction	3/23	0.0233155	0.468449	0	0	5.4198	20.371	DAB2;TGFB1;BMP6	0.130435	1.63236			GO_Biological_Process_2021	regulation of type B pancreatic cell proliferation	2/6	0.0378541	0.886249	0	0	8.76506	28.6969	NR1D1;NUPR1	0.333333	1.42189
GO_Biological_Process_2021	regulation of protein export from nucleus	3/23	0.0233155	0.468449	0	0	5.4198	20.371	GAS6;PTPN14;GTSE1	0.130435	1.63236			GO_Biological_Process_2021	protein sulfation	2/6	0.0378541	0.886249	0	0	8.76506	28.6969	TPST2;HS3ST5	0.333333	1.42189
Reactome_2016	Platelet degranulation	7/105	0.0239248	0.596692	0	0	2.58975	9.66714	TF;CLEC3B;TGFB1;SERPINA1;PROS1;FLNA;GAS6	0.0666667	1.62115			GO_Biological_Process_2021	regulation of digestive system process	2/6	0.0378541	0.886249	0	0	8.76506	28.6969	EPB41;KCNQ1	0.333333	1.42189
GO_Biological_Process_2021	positive regulation of biomineral tissue development	4/41	0.0243412	0.478295	0	0	3.91001	14.528	NELL1;TGFB1;OSR1;BMP6	0.097561	1.61366			GO_Biological_Process_2021	regulation of peptidyl-cysteine S-nitrosylation	2/6	0.0378541	0.886249	0	0	8.76506	28.6969	ATP2B4;DMD	0.333333	1.42189
GO_Biological_Process_2021	regulation of filopodium assembly	4/41	0.0243412	0.478295	0	0	3.91001	14.528	GPM6A;NLGN1;TENM2;DPYSL3	0.097561	1.61366			GO_Biological_Process_2021	epithelial tube formation	2/6	0.0378541	0.886249	0	0	8.76506	28.6969	SOX9;FGFR2	0.333333	1.42189
Reactome_2016	Elastic fibre formation	4/41	0.0243412	0.596692	0	0	3.91001	14.528	MFAP4;TGFB1;LOXL3;FBN1	0.097561	1.61366			GO_Biological_Process_2021	galactolipid biosynthetic process	2/6	0.0378541	0.886249	0	0	8.76506	28.6969	UGT8;GAL3ST1	0.333333	1.42189
Reactome_2016	Cell-cell junction organization	5/61	0.0244468	0.596692	0	0	3.23211	11.9952	CDH4;CLDN23;CDH9;CDH17;CDH7	0.0819672	1.61178			GO_Biological_Process_2021	galactosylceramide biosynthetic process	2/6	0.0378541	0.886249	0	0	8.76506	28.6969	UGT8;GAL3ST1	0.333333	1.42189
GO_Biological_Process_2021	regulated exocytosis	10/180	0.024922	0.478295	0	0	2.13681	7.88912	SYT4;TF;CLEC3B;RAB31;TGFB1;SERPINA1;PROS1;FLNA;GAS6;SNCA	0.0555556	1.60342			GO_Biological_Process_2021	glandular epithelial cell differentiation	2/6	0.0378541	0.886249	0	0	8.76506	28.6969	BMP2;FGFR2	0.333333	1.42189
GO_Biological_Process_2021	positive regulation of plasma membrane bounded cell projection assembly	6/83	0.0249614	0.478295	0	0	2.82296	10.4179	GPM6A;TENM2;NLGN1;DPYSL3;EPS8L3;CLRN1	0.0722892	1.60273			GO_Biological_Process_2021	cellular hyperosmotic response	2/6	0.0378541	0.886249	0	0	8.76506	28.6969	ARHGEF2;YBX3	0.333333	1.42189
GO_Biological_Process_2021	regulation of ruffle assembly	3/24	0.0261236	0.478295	0	0	5.16144	18.813	KANK1;NLGN1;EPS8L3	0.125	1.58297			GO_Biological_Process_2021	positive regulation of endoplasmic reticulum stress-induced intrinsic apoptotic signaling pathway	2/6	0.0378541	0.886249	0	0	8.76506	28.6969	DDIT3;PMAIP1	0.333333	1.42189
GO_Biological_Process_2021	wound healing, spreading of cells	3/24	0.0261236	0.478295	0	0	5.16144	18.813	TMEFF2;COL5A1;FLNA	0.125	1.58297			GO_Biological_Process_2021	positive regulation of extrinsic apoptotic signaling pathway via death domain receptors	2/6	0.0378541	0.886249	0	0	8.76506	28.6969	PMAIP1;ATF3	0.333333	1.42189
GO_Biological_Process_2021	regulation of cellular response to transforming growth factor beta stimulus	3/24	0.0261236	0.478295	0	0	5.16144	18.813	TGFBR3;TGFB1;SOX11	0.125	1.58297			Reactome_2016	Pre-NOTCH Processing in the Endoplasmic Reticulum	2/6	0.0378541	0.999996	0	0	8.76506	28.6969	NOTCH2;NOTCH3	0.333333	1.42189
GO_Biological_Process_2021	regulation of monooxygenase activity	3/24	0.0261236	0.478295	0	0	5.16144	18.813	DDAH1;NOS1AP;SNCA	0.125	1.58297			Reactome_2016	Uptake and function of diphtheria toxin	2/6	0.0378541	0.999996	0	0	8.76506	28.6969	CD9;HBEGF	0.333333	1.42189
Reactome_2016	Cell-Cell communication	8/131	0.0261313	0.596692	0	0	2.35952	8.59957	CDH4;DSCAM;CLDN23;FLNA;PARVB;CDH9;CDH17;CDH7	0.0610687	1.58284			GO_Biological_Process_2021	positive regulation of killing of cells of other organism	2/6	0.0378541	0.886249	0	0	8.76506	28.6969	SYK;PRF1	0.333333	1.42189
Reactome_2016	Retinoid metabolism and transport	4/42	0.0263458	0.596692	0	0	3.80692	13.8437	TTR;GPC5;BCO1;PLB1	0.0952381	1.57929			GO_Biological_Process_2021	regulation of axon extension involved in axon guidance	4/24	0.0380127	0.886249	0	0	3.50956	11.4757	SEMA5A;SEMA6A;SEMA3C;SEMA6D	0.166667	1.42007
GO_Biological_Process_2021	potassium ion import across plasma membrane	4/42	0.0263458	0.478295	0	0	3.80692	13.8437	KCNK9;KCNJ18;KCNJ2;KCNJ3	0.0952381	1.57929			GO_Biological_Process_2021	regulation of keratinocyte proliferation	4/24	0.0380127	0.886249	0	0	3.50956	11.4757	NOTCH2;ZFP36;PTPRK;FGFR2	0.166667	1.42007
Reactome_2016	Hemostasis	23/552	0.0276365	0.596692	0	0	1.58889	5.70191	PRKCG;GUCY1A2;SERPINA1;TGFB1;PRKCB;PROS1;GATA4;ADRA2A;SLC8A2;DOCK10;CLEC3B;TF;PDE10A;KIF26A;KIF4A;MYB;IRF7;FLNA;PRKG2;GAS6;ZFPM2;SLC16A3;PRKG1	0.0416667	1.55852			GO_Biological_Process_2021	inner ear morphogenesis	4/24	0.0380127	0.886249	0	0	3.50956	11.4757	TMIE;SOX9;FGFR2;ATP6V1B1	0.166667	1.42007
GO_Biological_Process_2021	regulation of cell motility	8/133	0.0282704	0.478295	0	0	2.32153	8.27844	DOCK10;FRMD5;TGFB1;SPOCK3;FLNA;NRG1;SRCIN1;PLXNA4	0.0601504	1.54867			GO_Biological_Process_2021	positive regulation of transcription from RNA polymerase II promoter in response to stress	4/24	0.0380127	0.886249	0	0	3.50956	11.4757	CEBPB;DDIT3;MT3;ATF3	0.166667	1.42007
GO_Biological_Process_2021	positive regulation of neuron differentiation	4/43	0.0284466	0.478295	0	0	3.70912	13.2034	HEYL;BRINP1;SOX11;NEUROG1	0.0930233	1.54597			GO_Biological_Process_2021	semaphorin-plexin signaling pathway	5/35	0.0385836	0.892361	0	0	2.92581	9.52329	SEMA5A;NRP2;SEMA6A;SEMA3C;SEMA6D	0.142857	1.4136
GO_Biological_Process_2021	positive regulation of receptor recycling	2/10	0.0284623	0.478295	0	0	9.0218	32.1102	BVES;SNCA	0.2	1.54573			GO_Biological_Process_2021	negative regulation of epithelial cell proliferation	8/72	0.0399788	0.91047	0	0	2.19653	7.07152	RGCC;NFIB;MARVELD3;PTPRK;SOX9;NUPR1;FGFR2;NKX3-1	0.111111	1.39817
GO_Biological_Process_2021	mitotic DNA replication checkpoint signaling	2/10	0.0284623	0.478295	0	0	9.0218	32.1102	ORC1;CDC6	0.2	1.54573			GO_Biological_Process_2021	enzyme linked receptor protein signaling pathway	13/140	0.0399965	0.91047	0	0	1.80111	5.79772	PTPRU;SYK;PTN;FGR;NPPC;ZAP70;EFS;FES;KIT;ROS1;EPHB4;FGFR2;FGFR1	0.0928571	1.39798
GO_Biological_Process_2021	urea cycle	2/10	0.0284623	0.478295	0	0	9.0218	32.1102	SLC25A15;ASS1	0.2	1.54573			KEGG_2021_Human	Tight junction	15/169	0.0406754	0.999994	0	0	1.7146	5.49036	MAGI1;PARD6G;YBX3;CLDN6;CLDN22;CLDN10;CCND1;CLDN8;MARVELD3;MICALL2;MYH14;ARHGEF2;MYL9;MPDZ;TJP3	0.0887574	1.39067
GO_Biological_Process_2021	sulfur amino acid catabolic process	2/10	0.0284623	0.478295	0	0	9.0218	32.1102	GADL1;MAT1A	0.2	1.54573			GO_Biological_Process_2021	regulation of actin filament-based process	8/73	0.0428634	0.941421	0	0	2.16262	6.81169	CNN2;ARHGEF19;FSCN1;GRHL3;RND3;CORO2B;ARHGEF5;RND1	0.109589	1.36791
GO_Biological_Process_2021	glycine transport	2/10	0.0284623	0.478295	0	0	9.0218	32.1102	SLC36A1;SLC6A17	0.2	1.54573			GO_Biological_Process_2021	endoderm formation	5/36	0.0428876	0.941421	0	0	2.83127	8.91617	DUSP5;MMP14;MMP2;FN1;ITGA7	0.138889	1.36767
GO_Biological_Process_2021	regulation of long-term synaptic depression	2/10	0.0284623	0.478295	0	0	9.0218	32.1102	GRID2;KCNB1	0.2	1.54573			GO_Biological_Process_2021	macrophage activation	5/36	0.0428876	0.941421	0	0	2.83127	8.91617	SYK;SLC11A1;IFI35;AIF1;TMEM106A	0.138889	1.36767
GO_Biological_Process_2021	regulation of high voltage-gated calcium channel activity	2/10	0.0284623	0.478295	0	0	9.0218	32.1102	NOS1AP;PDE4B	0.2	1.54573			GO_Biological_Process_2021	transition metal ion transport	5/36	0.0428876	0.941421	0	0	2.83127	8.91617	TRPC4;SLC11A1;ATP2C2;CP;MT3	0.138889	1.36767
GO_Biological_Process_2021	arginine metabolic process	2/10	0.0284623	0.478295	0	0	9.0218	32.1102	DDAH1;ASS1	0.2	1.54573			GO_Biological_Process_2021	regulation of cAMP-mediated signaling	4/25	0.0433819	0.941421	0	0	3.34226	10.4871	PEX5L;PRKAR2B;FFAR4;PDE3A	0.16	1.36269
GO_Biological_Process_2021	alanine transport	2/10	0.0284623	0.478295	0	0	9.0218	32.1102	SLC36A1;SLC6A17	0.2	1.54573			GO_Biological_Process_2021	negative regulation of endocytosis	4/25	0.0433819	0.941421	0	0	3.34226	10.4871	LGALS3;PACSIN3;SNX33;PROM2	0.16	1.36269
Reactome_2016	Removal of aminoterminal propeptides from gamma-carboxylated proteins	2/10	0.0284623	0.596692	0	0	9.0218	32.1102	PROS1;GAS6	0.2	1.54573			Reactome_2016	Metal ion SLC transporters	4/25	0.0433819	0.999996	0	0	3.34226	10.4871	SLC30A3;SLC11A1;SLC40A1;CP	0.16	1.36269
GO_Biological_Process_2021	response to histamine	2/10	0.0284623	0.478295	0	0	9.0218	32.1102	GABRB3;GABRG2	0.2	1.54573			GO_Biological_Process_2021	prostanoid biosynthetic process	3/15	0.0440167	0.941421	0	0	4.38474	13.6944	TBXAS1;PTGDS;PTGS1	0.2	1.35638
Reactome_2016	Gamma-carboxylation of protein precursors	2/10	0.0284623	0.596692	0	0	9.0218	32.1102	PROS1;GAS6	0.2	1.54573			GO_Biological_Process_2021	positive regulation of cell killing	3/15	0.0440167	0.941421	0	0	4.38474	13.6944	SYK;FZD7;PRF1	0.2	1.35638
Reactome_2016	Activation of Ca-permeable Kainate Receptor	2/10	0.0284623	0.596692	0	0	9.0218	32.1102	GRIK3;GRIK2	0.2	1.54573			KEGG_2021_Human	Glutamatergic synapse	11/114	0.0443606	0.999994	0	0	1.87801	5.85077	GRIN3A;HOMER1;GRM7;HOMER2;ADCY4;ITPR2;HOMER3;SLC17A7;PLD1;SLC38A3;GNG13	0.0964912	1.353
Reactome_2016	Ionotropic activity of Kainate Receptors	2/10	0.0284623	0.596692	0	0	9.0218	32.1102	GRIK3;GRIK2	0.2	1.54573			GO_Biological_Process_2021	extracellular structure organization	18/216	0.0455761	0.941421	0	0	1.60104	4.94462	COL18A1;COL13A1;LAMA1;MMP2;FN1;LAMC2;NID1;MMP11;MMP14;COL3A1;CDH1;ADAMTS18;COL5A3;SPOCK2;MMP17;ITGA11;COL4A5;ITGA7	0.0833333	1.34126
Reactome_2016	Urea cycle	2/10	0.0284623	0.596692	0	0	9.0218	32.1102	SLC25A15;ASS1	0.2	1.54573			GO_Biological_Process_2021	regulation of cytokine-mediated signaling pathway	8/74	0.0458822	0.941421	0	0	2.12974	6.56318	SOCS3;ELF1;SYK;PALM3;IRAK3;AGPAT2;USP18;TNFRSF1A	0.108108	1.33836
GO_Biological_Process_2021	modulation of chemical synaptic transmission	7/109	0.0286104	0.478295	0	0	2.48768	8.84118	GRID2;NLGN1;GRID1;GRIK3;GRIK2;DLGAP2;SLC8A2	0.0642202	1.54348			GO_Biological_Process_2021	external encapsulating structure organization	18/217	0.0473025	0.941421	0	0	1.59291	4.86028	COL18A1;COL13A1;LAMA1;MMP2;FN1;LAMC2;NID1;MMP11;MMP14;COL3A1;CDH1;ADAMTS18;COL5A3;SPOCK2;MMP17;ITGA11;COL4A5;ITGA7	0.0829493	1.32512
KEGG_2021_Human	Insulin secretion	6/86	0.0290879	0.596724	0	0	2.71668	9.61008	PRKCG;ADCYAP1R1;CCKAR;CREB3L3;PRKCB;KCNN2	0.0697674	1.53629			GO_Biological_Process_2021	cellular response to mechanical stimulus	6/49	0.0474679	0.941421	0	0	2.4501	7.46718	CNN2;CD40;SOX9;LTBR;TLR3;TNFRSF1A	0.122449	1.3236
GO_Biological_Process_2021	ventricular cardiac muscle tissue development	3/25	0.0291045	0.48287	0	0	4.92658	17.4246	TGFBR3;TGFB1;ID2	0.12	1.53604			GO_Biological_Process_2021	neural crest cell migration	5/37	0.0474686	0.941421	0	0	2.74265	8.35874	SEMA5A;SEMA6A;SEMA3C;SEMA6D;FN1	0.135135	1.32359
GO_Biological_Process_2021	sodium ion transmembrane transport	6/87	0.0305572	0.490077	0	0	2.683	9.35874	SLC9A2;SLC6A19;ASIC4;SLC6A17;ASIC2;SLC8A2	0.0689655	1.51489			GO_Biological_Process_2021	negative regulation of epithelial cell apoptotic process	5/37	0.0474686	0.941421	0	0	2.74265	8.35874	SEMA5A;YAP1;TCF7L2;ANGPT1;NUPR1	0.135135	1.32359
GO_Biological_Process_2021	embryonic organ morphogenesis	4/44	0.0306442	0.490077	0	0	3.6162	12.6036	ID2;HOXB4;SOX11;FBN1	0.0909091	1.51365			GO_Biological_Process_2021	glutamate receptor signaling pathway	5/37	0.0474686	0.941421	0	0	2.74265	8.35874	GRIN3A;GRM7;HOMER1;HOMER2;HOMER3	0.135135	1.32359
GO_Biological_Process_2021	BMP signaling pathway	5/65	0.0311244	0.490077	0	0	3.01601	10.4649	TGFBR3;TGFB1;HJV;SMAD9;BMP6	0.0769231	1.5069			GO_Biological_Process_2021	positive regulation of G1/S transition of mitotic cell cycle	4/26	0.0491542	0.941421	0	0	3.19017	9.61133	CCND2;RGCC;CCND1;AIF1	0.153846	1.30844
GO_Biological_Process_2021	lamellipodium assembly	3/26	0.0322574	0.490077	0	0	4.71214	16.1815	ABLIM2;ABLIM3;PARVB	0.115385	1.49137			GO_Biological_Process_2021	exocrine system development	2/7	0.0511252	0.941421	0	0	7.01168	20.8491	FGFR2;NKX3-1	0.285714	1.29136
GO_Biological_Process_2021	negative regulation of protein localization to membrane	3/26	0.0322574	0.490077	0	0	4.71214	16.1815	DAB2;PID1;TGFB1	0.115385	1.49137			GO_Biological_Process_2021	cellular amino acid biosynthetic process	2/7	0.0511252	0.941421	0	0	7.01168	20.8491	ALDH1A1;BCAT1	0.285714	1.29136
GO_Biological_Process_2021	mitotic G2/M transition checkpoint	4/45	0.0329392	0.490077	0	0	3.52782	12.0408	CDKN1A;ORC1;CDC6;DTL	0.0888889	1.48229			GO_Biological_Process_2021	regulation of smooth muscle cell differentiation	2/7	0.0511252	0.941421	0	0	7.01168	20.8491	OLFM2;FGFR2	0.285714	1.29136
GO_Biological_Process_2021	neural crest cell development	4/45	0.0329392	0.490077	0	0	3.52782	12.0408	SEMA3D;NRG1;SOX11;RADIL	0.0888889	1.48229			Reactome_2016	Regulation of gene expression in late stage (branching morphogenesis) pancreatic bud precursor cells	2/7	0.0511252	0.999996	0	0	7.01168	20.8491	ONECUT1;NEUROG3	0.285714	1.29136
KEGG_2021_Human	GABAergic synapse	6/89	0.0336393	0.596724	0	0	2.61808	8.8807	GABRB3;PRKCG;PRKCB;GAD1;PLCL1;GABRG2	0.0674157	1.47315			GO_Biological_Process_2021	regulation of vascular associated smooth muscle cell differentiation	2/7	0.0511252	0.941421	0	0	7.01168	20.8491	KIT;ENG	0.285714	1.29136
GO_Biological_Process_2021	collagen fibril organization	6/89	0.0336393	0.490077	0	0	2.61808	8.8807	COL2A1;COL5A1;COL6A2;COL6A1;LOXL3;P3H2	0.0674157	1.47315			GO_Biological_Process_2021	glycosylceramide biosynthetic process	2/7	0.0511252	0.941421	0	0	7.01168	20.8491	UGT8;GAL3ST1	0.285714	1.29136
KEGG_2021_Human	Serotonergic synapse	7/113	0.0338806	0.596724	0	0	2.39331	8.10115	PRKCG;GABRB3;KCND2;PRKCB;KCNN2;SLC18A2;KCNJ3	0.0619469	1.47005			GO_Biological_Process_2021	hexose catabolic process	2/7	0.0511252	0.941421	0	0	7.01168	20.8491	TKTL1;GALK1	0.285714	1.29136
GO_Biological_Process_2021	regulation of dendritic cell apoptotic process	2/11	0.0341736	0.490077	0	0	8.01897	27.0744	CXCL12;GAS6	0.181818	1.46631			GO_Biological_Process_2021	macropinocytosis	2/7	0.0511252	0.941421	0	0	7.01168	20.8491	RAB34;SNX33	0.285714	1.29136
GO_Biological_Process_2021	positive regulation of integrin activation	2/11	0.0341736	0.490077	0	0	8.01897	27.0744	CDH17;SKAP1	0.181818	1.46631			GO_Biological_Process_2021	vascular associated smooth muscle cell development	2/7	0.0511252	0.941421	0	0	7.01168	20.8491	EFEMP2;ENG	0.285714	1.29136
GO_Biological_Process_2021	positive regulation of alcohol biosynthetic process	2/11	0.0341736	0.490077	0	0	8.01897	27.0744	BMP6;SNCA	0.181818	1.46631			GO_Biological_Process_2021	negative regulation of dendritic spine development	2/7	0.0511252	0.941421	0	0	7.01168	20.8491	GRIN3A;NGEF	0.285714	1.29136
GO_Biological_Process_2021	mesonephros development	2/11	0.0341736	0.490077	0	0	8.01897	27.0744	OSR1;ZBTB16	0.181818	1.46631			GO_Biological_Process_2021	negative regulation of MyD88-independent toll-like receptor signaling pathway	2/7	0.0511252	0.941421	0	0	7.01168	20.8491	LY96;TLR3	0.285714	1.29136
GO_Biological_Process_2021	somite development	2/11	0.0341736	0.490077	0	0	8.01897	27.0744	LOXL3;SOX11	0.181818	1.46631			GO_Biological_Process_2021	parallel actin filament bundle assembly	2/7	0.0511252	0.941421	0	0	7.01168	20.8491	FSCN1;AIF1	0.285714	1.29136
GO_Biological_Process_2021	response to prostaglandin E	2/11	0.0341736	0.490077	0	0	8.01897	27.0744	PTGER4;TGFBR3	0.181818	1.46631			GO_Biological_Process_2021	endothelial cell morphogenesis	2/7	0.0511252	0.941421	0	0	7.01168	20.8491	COL18A1;STC1	0.285714	1.29136
GO_Biological_Process_2021	embryonic eye morphogenesis	2/11	0.0341736	0.490077	0	0	8.01897	27.0744	TH;FBN1	0.181818	1.46631			GO_Biological_Process_2021	gamma-delta T cell activation	2/7	0.0511252	0.941421	0	0	7.01168	20.8491	JAML;SOX13	0.285714	1.29136
GO_Biological_Process_2021	columnar/cuboidal epithelial cell differentiation	2/11	0.0341736	0.490077	0	0	8.01897	27.0744	GATA4;SOX11	0.181818	1.46631			GO_Biological_Process_2021	regulation of blood-brain barrier permeability	2/7	0.0511252	0.941421	0	0	7.01168	20.8491	ANGPT1;TJP3	0.285714	1.29136
KEGG_2021_Human	Taurine and hypotaurine metabolism	2/11	0.0341736	0.596724	0	0	8.01897	27.0744	GAD1;GADL1	0.181818	1.46631			Reactome_2016	Synthesis of Ketone Bodies	2/7	0.0511252	0.999996	0	0	7.01168	20.8491	BDH2;BDH1	0.285714	1.29136
GO_Biological_Process_2021	cardiac muscle cell membrane repolarization	2/11	0.0341736	0.490077	0	0	8.01897	27.0744	KCNJ2;KCNJ3	0.181818	1.46631			GO_Biological_Process_2021	motor neuron axon guidance	3/16	0.0520607	0.945504	0	0	4.04724	11.961	SLIT1;LAMC2;SLIT2	0.1875	1.28349
GO_Biological_Process_2021	positive regulation of non-canonical Wnt signaling pathway	2/11	0.0341736	0.490077	0	0	8.01897	27.0744	DAB2;RSPO3	0.181818	1.46631			GO_Biological_Process_2021	regulation of mast cell degranulation	3/16	0.0520607	0.945504	0	0	4.04724	11.961	FGR;SYK;FES	0.1875	1.28349
Reactome_2016	Gamma-carboxylation, transport, and amino-terminal cleavage of proteins	2/11	0.0341736	0.668663	0	0	8.01897	27.0744	PROS1;GAS6	0.181818	1.46631			GO_Biological_Process_2021	negative regulation of endothelial cell migration	5/38	0.0523281	0.945504	0	0	2.6594	7.84582	RGCC;JUP;ATP2B4;STC1;SLIT2	0.131579	1.28126
Reactome_2016	CDC6 association with the ORC:origin complex	2/11	0.0341736	0.668663	0	0	8.01897	27.0744	ORC1;CDC6	0.181818	1.46631			Reactome_2016	Collagen biosynthesis and modifying enzymes	7/63	0.052778	0.999996	0	0	2.19541	6.45816	COL18A1;COL3A1;COL13A1;COL25A1;COL5A3;SERPINH1;COL4A5	0.111111	1.27755
GO_Biological_Process_2021	positive regulation of macrophage differentiation	2/11	0.0341736	0.490077	0	0	8.01897	27.0744	TGFB1;ID2	0.181818	1.46631			GO_Biological_Process_2021	peptide hormone secretion	4/27	0.0553276	0.956808	0	0	3.05131	8.83196	GAL;LTBP4;FFAR4;MAFA	0.148148	1.25706
GO_Biological_Process_2021	sodium ion transport	6/90	0.035253	0.490077	0	0	2.58678	8.65331	SLC6A19;ASIC4;SLC6A17;ASIC2;FGF13;SLC8A2	0.0666667	1.4528			GO_Biological_Process_2021	positive regulation of phosphatidylinositol 3-kinase signaling	8/77	0.0557595	0.956808	0	0	2.03682	5.8797	FGR;KIT;GAB1;FN1;SOX9;PIK3AP1;NKX3-1;FGFR1	0.103896	1.25368
GO_Biological_Process_2021	protein complex oligomerization	6/90	0.035253	0.490077	0	0	2.58678	8.65331	GSDMD;PRMT8;GLRA3;CARD9;VSTM5;SNCA	0.0666667	1.4528			GO_Biological_Process_2021	mesenchymal cell differentiation	6/51	0.0559045	0.956808	0	0	2.34096	6.75159	BMP2;AKNA;SOX9;FGFR2;ENG;FGFR1	0.117647	1.25255
GO_Biological_Process_2021	positive regulation of nucleocytoplasmic transport	4/46	0.0353319	0.490077	0	0	3.44365	11.512	TGFB1;FLNA;GAS6;GTSE1	0.0869565	1.45183			Reactome_2016	Developmental Biology	53/786	0.0569325	0.999996	0	0	1.27913	3.66585	SEMA5A;NRP2;ONECUT1;ARRB1;RND1;EPHB4;DUSP5;SEMA6A;TRPC4;MMP2;SEMA6D;ADAM11;PAX4;UNC5C;GFRA1;IL17RD;APBB1IP;NR5A2;KIT;DCX;COL4A5;ANGPTL4;MYL9;NGEF;HIST1H2BD;HBEGF;CEBPB;LAMA1;GATA6;EFNA4;ABLIM1;EFNB3;ADAM23;ST8SIA4;SLIT1;PAK6;MYH14;SLIT2;SRGAP3;SRGAP1;MAP2K6;EGR2;ANGPT1;CDX2;FN1;MAFA;MEIS1;KLF5;NR6A1;FES;FGFR2;NEUROG3;FGFR1	0.06743	1.24464
GO_Biological_Process_2021	alpha-amino acid metabolic process	4/46	0.0353319	0.490077	0	0	3.44365	11.512	DDAH1;ASPG;GADL1;ASS1	0.0869565	1.45183			GO_Biological_Process_2021	sensory perception of sound	9/91	0.057197	0.956808	0	0	1.92862	5.51826	TMIE;GRM7;HOMER2;KCNQ1;KIT;MYH14;DCDC2;LHFPL3;ATP6V1B1	0.0989011	1.24263
GO_Biological_Process_2021	cellular senescence	3/27	0.0355809	0.490077	0	0	4.51557	15.0637	CDKN1A;CDKN2B;ID2	0.111111	1.44878			GO_Biological_Process_2021	regulation of actin cytoskeleton organization	9/91	0.057197	0.956808	0	0	1.92862	5.51826	NOTCH2;ARHGEF19;FSCN1;GRHL3;ESAM;RND3;CORO2B;ARHGEF5;RND1	0.0989011	1.24263
GO_Biological_Process_2021	positive regulation of nitric oxide biosynthetic process	3/27	0.0355809	0.490077	0	0	4.51557	15.0637	DDAH1;NOS1AP;ASS1	0.111111	1.44878			KEGG_2021_Human	Cell adhesion molecules	13/148	0.0577751	0.999994	0	0	1.69366	4.82896	NTNG1;NLGN3;CD40;SDC3;CLDN6;CLDN22;CLDN10;MAG;CDH1;CLDN8;ESAM;NCAM2;NECTIN1	0.0878378	1.23826
GO_Biological_Process_2021	presynaptic endocytosis	3/27	0.0355809	0.490077	0	0	4.51557	15.0637	NLGN1;SNCB;SNCA	0.111111	1.44878			GO_Biological_Process_2021	sprouting angiogenesis	6/52	0.0604398	0.956808	0	0	2.28995	6.42584	SEMA5A;EGR3;ANGPT1;SLIT2;EPHB4;ENG	0.115385	1.21868
GO_Biological_Process_2021	negative regulation of insulin receptor signaling pathway	3/27	0.0355809	0.490077	0	0	4.51557	15.0637	KANK1;PID1;PRKCB	0.111111	1.44878			GO_Biological_Process_2021	positive regulation of cyclin-dependent protein serine/threonine kinase activity	3/17	0.0607579	0.956808	0	0	3.75795	10.5255	CCND2;RGCC;CCND1	0.176471	1.2164
GO_Biological_Process_2021	neuron projection morphogenesis	8/140	0.0367042	0.502388	0	0	2.19762	7.26285	DOCK10;GPM6A;NTNG2;NLGN1;SLITRK1;ADGRB1;EPHB1;DCLK1	0.0571429	1.43528			GO_Biological_Process_2021	muscle tissue morphogenesis	3/17	0.0607579	0.956808	0	0	3.75795	10.5255	BMP2;EFEMP2;ACTC1	0.176471	1.2164
GO_Biological_Process_2021	epithelial to mesenchymal transition	4/47	0.0378226	0.504623	0	0	3.36339	11.0146	TGFBR3;HEYL;TGFB1;LOXL3	0.0851064	1.42225			GO_Biological_Process_2021	mesenchyme morphogenesis	3/17	0.0607579	0.956808	0	0	3.75795	10.5255	BMP2;SOX9;ENG	0.176471	1.2164
GO_Biological_Process_2021	positive regulation of transmembrane receptor protein serine/threonine kinase signaling pathway	6/92	0.038628	0.504623	0	0	2.52636	8.22023	CDKN2B;DAB2;TGFB1;SOX11;ZNF423;BMP6	0.0652174	1.4131			Reactome_2016	TNF receptor superfamily (TNFSF) members mediating non-canonical NF-kB pathway	3/17	0.0607579	0.999996	0	0	3.75795	10.5255	CD40;TNFRSF13C;LTBR	0.176471	1.2164
KEGG_2021_Human	Renin secretion	5/69	0.0388441	0.629829	0	0	2.82693	9.18243	PTGER4;GUCY1A2;ADCYAP1R1;PRKG2;KCNJ2	0.0724638	1.41067			KEGG_2021_Human	Primary bile acid biosynthesis	3/17	0.0607579	0.999994	0	0	3.75795	10.5255	CYP27A1;HSD3B7;ACOX2	0.176471	1.2164
GO_Biological_Process_2021	cellular response to interleukin-6	3/28	0.0390737	0.504623	0	0	4.33472	14.0545	PTPRT;CEBPA;PID1	0.107143	1.40812			GO_Biological_Process_2021	regulation of neuron migration	4/28	0.0618982	0.956808	0	0	2.92402	8.13539	NTNG1;COL3A1;SEMA6A;ARHGEF2	0.142857	1.20832
GO_Biological_Process_2021	regulation of reactive oxygen species biosynthetic process	3/28	0.0390737	0.504623	0	0	4.33472	14.0545	ADGRB1;SLC18A2;SNCA	0.107143	1.40812			GO_Biological_Process_2021	response to ketone	4/28	0.0618982	0.956808	0	0	2.92402	8.13539	CATSPER1;YAP1;SLIT2;NKX3-1	0.142857	1.20832
GO_Biological_Process_2021	negative regulation of cellular response to insulin stimulus	3/28	0.0390737	0.504623	0	0	4.33472	14.0545	KANK1;PID1;PRKCB	0.107143	1.40812			GO_Biological_Process_2021	protein localization to cell surface	4/28	0.0618982	0.956808	0	0	2.92402	8.13539	PRRT1;PTPRU;ANGPT1;PTPRK	0.142857	1.20832
GO_Biological_Process_2021	positive regulation of nitric oxide metabolic process	3/28	0.0390737	0.504623	0	0	4.33472	14.0545	DDAH1;NOS1AP;ASS1	0.107143	1.40812			GO_Biological_Process_2021	protein localization to plasma membrane	12/136	0.0646614	0.956808	0	0	1.70147	4.65963	FYB2;EHD3;TSPAN14;JUP;CDH1;RAB15;RAB34;KCNB2;KCNIP3;FAM126A;EFR3B;TNFRSF1A	0.0882353	1.18935
GO_Biological_Process_2021	positive regulation of vascular permeability	2/12	0.0402866	0.504623	0	0	7.2167	23.1781	TGFB1;BMP6	0.166667	1.39484			GO_Biological_Process_2021	positive regulation of vascular associated smooth muscle cell migration	2/8	0.0657726	0.956808	0	0	5.84276	15.9014	DOCK5;DOCK4	0.25	1.18196
Reactome_2016	Caspase-mediated cleavage of cytoskeletal proteins	2/12	0.0402866	0.762847	0	0	7.2167	23.1781	GAS2;VIM	0.166667	1.39484			GO_Biological_Process_2021	positive regulation of oligodendrocyte differentiation	2/8	0.0657726	0.956808	0	0	5.84276	15.9014	CXCR4;PTN	0.25	1.18196
GO_Biological_Process_2021	positive regulation of cardiocyte differentiation	2/12	0.0402866	0.504623	0	0	7.2167	23.1781	TGFB1;GATA4	0.166667	1.39484			GO_Biological_Process_2021	positive regulation of epithelial cell proliferation involved in wound healing	2/8	0.0657726	0.956808	0	0	5.84276	15.9014	JAML;FZD7	0.25	1.18196
GO_Biological_Process_2021	regulation of leukocyte cell-cell adhesion	2/12	0.0402866	0.504623	0	0	7.2167	23.1781	ASS1;SKAP1	0.166667	1.39484			GO_Biological_Process_2021	regulation of protein localization to cell cortex	2/8	0.0657726	0.956808	0	0	5.84276	15.9014	GPSM2;EPB41	0.25	1.18196
GO_Biological_Process_2021	eye photoreceptor cell differentiation	2/12	0.0402866	0.504623	0	0	7.2167	23.1781	DSCAM;TH	0.166667	1.39484			GO_Biological_Process_2021	negative regulation of mitochondrial membrane potential	2/8	0.0657726	0.956808	0	0	5.84276	15.9014	PMAIP1;RNF122	0.25	1.18196
GO_Biological_Process_2021	tyrosine metabolic process	2/12	0.0402866	0.504623	0	0	7.2167	23.1781	TH;PAH	0.166667	1.39484			GO_Biological_Process_2021	negative regulation of keratinocyte proliferation	2/8	0.0657726	0.956808	0	0	5.84276	15.9014	PTPRK;FGFR2	0.25	1.18196
GO_Biological_Process_2021	negative regulation of glucose transmembrane transport	2/12	0.0402866	0.504623	0	0	7.2167	23.1781	PID1;PRKCB	0.166667	1.39484			GO_Biological_Process_2021	negative regulation of cAMP-dependent protein kinase activity	2/8	0.0657726	0.956808	0	0	5.84276	15.9014	PKIB;PRKAR2B	0.25	1.18196
GO_Biological_Process_2021	negative regulation of production of miRNAs involved in gene silencing by miRNA	2/12	0.0402866	0.504623	0	0	7.2167	23.1781	LIN28B;TGFB1	0.166667	1.39484			GO_Biological_Process_2021	sequestering of BMP from receptor via BMP binding	2/8	0.0657726	0.956808	0	0	5.84276	15.9014	BMP2;FSTL1	0.25	1.18196
GO_Biological_Process_2021	carbohydrate homeostasis	5/70	0.0409404	0.504623	0	0	2.7833	8.8944	CEBPA;NGFR;VGF;KCNB1;ADRA2A	0.0714286	1.38785			GO_Biological_Process_2021	response to epinephrine	2/8	0.0657726	0.956808	0	0	5.84276	15.9014	KCNQ1;ATP2B4	0.25	1.18196
GO_Biological_Process_2021	regulation of neuronal synaptic plasticity	3/29	0.0427339	0.504623	0	0	4.16779	13.14	GRIK2;SHISA9;SLC8A2	0.103448	1.36923			GO_Biological_Process_2021	galactosylceramide metabolic process	2/8	0.0657726	0.956808	0	0	5.84276	15.9014	UGT8;GAL3ST1	0.25	1.18196
GO_Biological_Process_2021	lamellipodium organization	3/29	0.0427339	0.504623	0	0	4.16779	13.14	ABLIM2;ABLIM3;PARVB	0.103448	1.36923			Reactome_2016	Regulation of gene expression in early pancreatic precursor cells	2/8	0.0657726	0.999996	0	0	5.84276	15.9014	NR5A2;ONECUT1	0.25	1.18196
GO_Biological_Process_2021	adherens junction organization	4/49	0.0430988	0.504623	0	0	3.21357	10.1043	CDH4;CDH9;CDH17;CDH7	0.0816327	1.36553			GO_Biological_Process_2021	elastic fiber assembly	2/8	0.0657726	0.956808	0	0	5.84276	15.9014	EFEMP2;LTBP3	0.25	1.18196
GO_Biological_Process_2021	negative regulation of catabolic process	4/49	0.0430988	0.504623	0	0	3.21357	10.1043	PRKCG;ADGRB1;FLNA;ADRA2A	0.0816327	1.36553			GO_Biological_Process_2021	regulation of MyD88-independent toll-like receptor signaling pathway	2/8	0.0657726	0.956808	0	0	5.84276	15.9014	LY96;TLR3	0.25	1.18196
GO_Biological_Process_2021	positive regulation of reactive oxygen species metabolic process	4/49	0.0430988	0.504623	0	0	3.21357	10.1043	CDKN1A;PID1;TGFB1;ADGRB1	0.0816327	1.36553			GO_Biological_Process_2021	cellular response to epinephrine stimulus	2/8	0.0657726	0.956808	0	0	5.84276	15.9014	KCNQ1;ATP2B4	0.25	1.18196
GO_Biological_Process_2021	cellular response to BMP stimulus	5/71	0.043104	0.504623	0	0	2.74098	8.61803	TGFBR3;TGFB1;HJV;SMAD9;BMP6	0.0704225	1.36548			GO_Biological_Process_2021	regulation of chaperone-mediated autophagy	2/8	0.0657726	0.956808	0	0	5.84276	15.9014	EEF1A2;GFAP	0.25	1.18196
GO_Biological_Process_2021	regulation of G1/S transition of mitotic cell cycle	5/71	0.043104	0.504623	0	0	2.74098	8.61803	CDKN1A;CDKN2B;ID2;TM4SF5;DACT1	0.0704225	1.36548			GO_Biological_Process_2021	regulation of anion transport	2/8	0.0657726	0.956808	0	0	5.84276	15.9014	ATP8B1;STC1	0.25	1.18196
GO_Biological_Process_2021	sensory perception of light stimulus	6/95	0.0440641	0.504623	0	0	2.44083	7.62053	RD3;COL2A1;TH;CRYBG3;CRYBB2;CLRN1	0.0631579	1.35591			Reactome_2016	Organic anion transporters	2/8	0.0657726	0.999996	0	0	5.84276	15.9014	SLC5A8;SLC17A7	0.25	1.18196
GO_Biological_Process_2021	positive regulation of neurogenesis	5/72	0.0453351	0.504623	0	0	2.69993	8.35271	NGFR;RGS14;SLITRK1;SOX11;PLXNA4	0.0694444	1.34357			Reactome_2016	Insulin-like Growth Factor-2 mRNA Binding Proteins (IGF2BPs/IMPs/VICKZs) bind RNA	2/8	0.0657726	0.999996	0	0	5.84276	15.9014	IGF2BP1;IGF2BP2	0.25	1.18196
GO_Biological_Process_2021	positive regulation of secretion by cell	5/72	0.0453351	0.504623	0	0	2.69993	8.35271	TGFB1;KCNB1;SOX11;BMP6;SNCA	0.0694444	1.34357			Reactome_2016	Axonal growth inhibition (RHOA activation)	2/8	0.0657726	0.999996	0	0	5.84276	15.9014	LINGO1;MAG	0.25	1.18196
GO_Biological_Process_2021	amino acid transport	4/50	0.0458842	0.504623	0	0	3.14355	9.68727	SLC36A1;SLC6A19;SLC6A17;SLC38A4	0.08	1.33834			Reactome_2016	Ketone body metabolism	2/8	0.0657726	0.999996	0	0	5.84276	15.9014	BDH2;BDH1	0.25	1.18196
GO_Biological_Process_2021	protein homooligomerization	7/121	0.0462681	0.504623	0	0	2.22444	6.83638	GSDMD;PRMT8;GLRA3;CARD9;MAT1A;VSTM5;KCNJ2	0.0578512	1.33472			GO_Biological_Process_2021	regulation of fat cell differentiation	8/80	0.066894	0.956808	0	0	1.95164	5.2785	YAP1;WWTR1;ZFP36;CEBPB;BMP2;FRZB;NR1D1;TRPM4	0.1	1.17461
GO_Biological_Process_2021	regulation of catecholamine secretion	3/30	0.0465592	0.504623	0	0	4.01322	12.3087	SYT4;KCNB1;SNCA	0.1	1.33199			GO_Biological_Process_2021	hemopoiesis	9/94	0.0674889	0.956808	0	0	1.86025	5.01485	NOTCH2;LYL1;MEIS1;MECOM;FUT10;RTKN2;KIT;AHSP;FGFR2	0.0957447	1.17077
GO_Biological_Process_2021	synaptic vesicle cycle	3/30	0.0465592	0.504623	0	0	4.01322	12.3087	NLGN1;SLC18A2;SNCA	0.1	1.33199			GO_Biological_Process_2021	visual system development	5/41	0.0685781	0.956808	0	0	2.4374	6.53169	SIX6;MEIS1;RBP4;ADAMTS18;MEIS2	0.121951	1.16381
KEGG_2021_Human	beta-Alanine metabolism	3/30	0.0465592	0.675807	0	0	4.01322	12.3087	GAD1;GADL1;CNDP1	0.1	1.33199			GO_Biological_Process_2021	epithelial cell migration	5/41	0.0685781	0.956808	0	0	2.4374	6.53169	DPP4;PKN3;PXN;KIT;FSTL1	0.121951	1.16381
Reactome_2016	GABA A receptor activation	2/13	0.0467756	0.799293	0	0	6.5603	20.0902	GABRB3;GABRG2	0.153846	1.32998			GO_Biological_Process_2021	intrinsic apoptotic signaling pathway in response to endoplasmic reticulum stress	4/29	0.0688604	0.956808	0	0	2.80691	7.51037	PPP1R15A;CEBPB;DDIT3;ATP2A3	0.137931	1.16203
GO_Biological_Process_2021	negative regulation of locomotion	2/13	0.0467756	0.504623	0	0	6.5603	20.0902	FRMD5;SPOCK3	0.153846	1.32998			Reactome_2016	Axon guidance	36/515	0.0690973	0.999996	0	0	1.32621	3.54394	SEMA5A;NRP2;LAMA1;ARRB1;EFNA4;RND1;ABLIM1;EFNB3;ST8SIA4;SLIT1;PAK6;MYH14;SRGAP3;SLIT2;SRGAP1;EPHB4;DUSP5;SEMA6A;ANGPT1;TRPC4;SEMA6D;MMP2;FN1;UNC5C;GFRA1;IL17RD;APBB1IP;FES;KIT;DCX;COL4A5;MYL9;NGEF;FGFR2;HBEGF;FGFR1	0.0699029	1.16054
Reactome_2016	Signaling by Activin	2/13	0.0467756	0.799293	0	0	6.5603	20.0902	ACVR1C;FST	0.153846	1.32998			Reactome_2016	Semaphorin interactions	7/67	0.0691766	0.999996	0	0	2.04862	5.47205	SEMA5A;SEMA6A;FES;SEMA6D;MYH14;MYL9;RND1	0.104478	1.16004
GO_Biological_Process_2021	positive regulation of calcium ion-dependent exocytosis	2/13	0.0467756	0.504623	0	0	6.5603	20.0902	SYT4;KCNB1	0.153846	1.32998			GO_Biological_Process_2021	regulation of cartilage development	3/18	0.070083	0.956808	0	0	3.50724	9.3225	BMP2;SOX9;SOX6	0.166667	1.15439
GO_Biological_Process_2021	positive regulation of ruffle assembly	2/13	0.0467756	0.504623	0	0	6.5603	20.0902	NLGN1;EPS8L3	0.153846	1.32998			Reactome_2016	Pre-NOTCH Processing in Golgi	3/18	0.070083	0.999996	0	0	3.50724	9.3225	NOTCH2;NOTCH3;ATP2A3	0.166667	1.15439
GO_Biological_Process_2021	pathway-restricted SMAD protein phosphorylation	2/13	0.0467756	0.504623	0	0	6.5603	20.0902	TGFBR3;TGFB1	0.153846	1.32998			GO_Biological_Process_2021	regulation of platelet aggregation	3/18	0.070083	0.956808	0	0	3.50724	9.3225	SYK;ADAMTS18;CD9	0.166667	1.15439
GO_Biological_Process_2021	negative regulation of substrate adhesion-dependent cell spreading	2/13	0.0467756	0.504623	0	0	6.5603	20.0902	KANK1;SPRY4	0.153846	1.32998			GO_Biological_Process_2021	positive chemotaxis	3/18	0.070083	0.956808	0	0	3.50724	9.3225	SEMA5A;LGALS3;ANGPT1	0.166667	1.15439
GO_Biological_Process_2021	negative regulation of macromolecule biosynthetic process	2/13	0.0467756	0.504623	0	0	6.5603	20.0902	TMEFF2;TGFB1	0.153846	1.32998			GO_Biological_Process_2021	positive regulation of cartilage development	3/18	0.070083	0.956808	0	0	3.50724	9.3225	BMP2;SOX9;SOX6	0.166667	1.15439
GO_Biological_Process_2021	negative regulation of cell morphogenesis involved in differentiation	2/13	0.0467756	0.504623	0	0	6.5603	20.0902	KANK1;SPRY4	0.153846	1.32998			GO_Biological_Process_2021	cell migration involved in sprouting angiogenesis	3/18	0.070083	0.956808	0	0	3.50724	9.3225	EGR3;SLIT2;EPHB4	0.166667	1.15439
GO_Biological_Process_2021	spinal cord development	2/13	0.0467756	0.504623	0	0	6.5603	20.0902	LOXL3;SOX11	0.153846	1.32998			GO_Biological_Process_2021	pulmonary valve development	3/18	0.070083	0.956808	0	0	3.50724	9.3225	NOTCH2;SLIT2;TNFRSF1A	0.166667	1.15439
GO_Biological_Process_2021	response to UV-B	2/13	0.0467756	0.504623	0	0	6.5603	20.0902	MFAP4;CDKN1A	0.153846	1.32998			Reactome_2016	Heparan sulfate/heparin (HS-GAG) metabolism	6/54	0.0701466	0.999996	0	0	2.1943	5.83063	NDST4;SDC3;GPC2;HS3ST5;GPC4;HS3ST1	0.111111	1.15399
GO_Biological_Process_2021	response to interleukin-6	2/13	0.0467756	0.504623	0	0	6.5603	20.0902	PTPRT;PID1	0.153846	1.32998			Reactome_2016	Netrin-1 signaling	5/42	0.074548	0.999996	0	0	2.3714	6.15688	ABLIM1;TRPC4;SLIT1;UNC5C;SLIT2	0.119048	1.12756
GO_Biological_Process_2021	regulation of nucleocytoplasmic transport	2/13	0.0467756	0.504623	0	0	6.5603	20.0902	TGFB1;PTPN14	0.153846	1.32998			GO_Biological_Process_2021	cell-cell junction organization	8/82	0.0750258	0.956808	0	0	1.89869	4.91747	JUP;CDH1;MARVELD3;CDH12;FSCN1;DCHS1;TJP3;NECTIN1	0.097561	1.12479
GO_Biological_Process_2021	cardiac right ventricle morphogenesis	2/13	0.0467756	0.504623	0	0	6.5603	20.0902	GATA4;ZFPM2	0.153846	1.32998			GO_Biological_Process_2021	regulation of blood vessel endothelial cell migration	6/55	0.0753175	0.956808	0	0	2.14941	5.55846	CD40;RGCC;ANGPT1;JUP;ATP2B4;FGFR1	0.109091	1.1231
GO_Biological_Process_2021	atrial cardiac muscle cell action potential	2/13	0.0467756	0.504623	0	0	6.5603	20.0902	KCNN2;KCNJ3	0.153846	1.32998			GO_Biological_Process_2021	plasma membrane invagination	4/30	0.0762072	0.956808	0	0	2.69881	6.94754	SNX33;FCGR1A;AIF1;ARHGAP12	0.133333	1.118
GO_Biological_Process_2021	AMP metabolic process	2/13	0.0467756	0.504623	0	0	6.5603	20.0902	NT5E;AK4	0.153846	1.32998			GO_Biological_Process_2021	negative regulation of Notch signaling pathway	4/30	0.0762072	0.956808	0	0	2.69881	6.94754	NOTCH3;MMP14;TCIM;ARRB1	0.133333	1.118
GO_Biological_Process_2021	mitotic DNA integrity checkpoint signaling	2/13	0.0467756	0.504623	0	0	6.5603	20.0902	ORC1;CDC6	0.153846	1.32998			GO_Biological_Process_2021	morphogenesis of an epithelium	4/30	0.0762072	0.956808	0	0	2.69881	6.94754	AIRE;SOX9;FGFR2;ARHGAP12	0.133333	1.118
GO_Biological_Process_2021	cation transport	9/174	0.0474325	0.509202	0	0	1.9782	6.03043	SLC36A1;SLC6A17;KCNK9;KCNN2;FGF13;SLC18A2;KCNJ2;SLC8A2;KCNJ3	0.0517241	1.32392			GO_Biological_Process_2021	protein localization to cell periphery	12/140	0.0767628	0.956808	0	0	1.64795	4.23034	FYB2;EHD3;TSPAN14;JUP;CDH1;RAB15;RAB34;KCNB2;KCNIP3;FAM126A;EFR3B;TNFRSF1A	0.0857143	1.11485
KEGG_2021_Human	p53 signaling pathway	5/73	0.0476339	0.675807	0	0	2.66009	8.09788	CDKN1A;ZMAT3;ADGRB1;GTSE1;TP73	0.0684932	1.32208			GO_Biological_Process_2021	cellular response to decreased oxygen levels	7/69	0.0783978	0.956808	0	0	1.98232	5.04692	OPRD1;EGLN3;RGCC;GATA6;PMAIP1;MT3;NKX3-1	0.101449	1.1057
GO_Biological_Process_2021	epithelium development	7/122	0.0479954	0.512732	0	0	2.20498	6.69576	TGFB1;OSR1;CDHR2;LOXL3;SOX11;UPK3A;DACT1	0.057377	1.3188			GO_Biological_Process_2021	positive regulation of cold-induced thermogenesis	9/97	0.0788717	0.956808	0	0	1.79655	4.56311	CEBPB;SYK;PRDM16;FFAR4;CXCR4;ESRRG;PTH2R;TRPM8;FGF21	0.0927835	1.10308
GO_Biological_Process_2021	positive regulation of intracellular protein transport	8/148	0.0482432	0.512877	0	0	2.07119	6.2788	CEMIP;TGFB1;ABLIM3;KCNB1;FLNA;GAS6;GTSE1;TP73	0.0540541	1.31656			Reactome_2016	Other semaphorin interactions	3/19	0.0800078	0.999996	0	0	3.28786	8.30392	SEMA5A;SEMA6A;SEMA6D	0.157895	1.09687
GO_Biological_Process_2021	mesenchymal cell differentiation	4/51	0.0487677	0.515948	0	0	3.07651	9.29317	TGFBR3;HEYL;TGFB1;LOXL3	0.0784314	1.31187			Reactome_2016	Defective B3GAT3 causes JDSSDHD	3/19	0.0800078	0.999996	0	0	3.28786	8.30392	SDC3;GPC2;GPC4	0.157895	1.09687
Reactome_2016	Metabolism of fat-soluble vitamins	4/51	0.0487677	0.799293	0	0	3.07651	9.29317	TTR;GPC5;BCO1;PLB1	0.0784314	1.31187			Reactome_2016	Defective B4GALT7 causes EDS, progeroid type	3/19	0.0800078	0.999996	0	0	3.28786	8.30392	SDC3;GPC2;GPC4	0.157895	1.09687
GO_Biological_Process_2021	cellular response to organic substance	7/123	0.0497633	0.52395	0	0	2.18586	6.55863	CLEC3B;PID1;TGFB1;ACVR1C;DPYSL3;PTPN14;ADRA2A	0.0569106	1.30309			Reactome_2016	Defective B3GALT6 causes EDSP2 and SEMDJL1	3/19	0.0800078	0.999996	0	0	3.28786	8.30392	SDC3;GPC2;GPC4	0.157895	1.09687
Reactome_2016	Amino acid transport across the plasma membrane	3/31	0.0505474	0.799293	0	0	3.86969	11.5504	SLC36A1;SLC6A19;SLC38A4	0.0967742	1.2963			GO_Biological_Process_2021	establishment or maintenance of apical/basal cell polarity	3/19	0.0800078	0.956808	0	0	3.28786	8.30392	CLIC4;FSCN1;PARD3B	0.157895	1.09687
Reactome_2016	Glutamate Binding, Activation of AMPA Receptors and Synaptic Plasticity	3/31	0.0505474	0.799293	0	0	3.86969	11.5504	GRIA1;PRKCG;PRKCB	0.0967742	1.2963			GO_Biological_Process_2021	prostaglandin biosynthetic process	3/19	0.0800078	0.956808	0	0	3.28786	8.30392	TBXAS1;PTGDS;PTGS1	0.157895	1.09687
Reactome_2016	Trafficking of AMPA receptors	3/31	0.0505474	0.799293	0	0	3.86969	11.5504	GRIA1;PRKCG;PRKCB	0.0967742	1.2963			GO_Biological_Process_2021	negative regulation of striated muscle cell differentiation	3/19	0.0800078	0.956808	0	0	3.28786	8.30392	BMP2;FZD7;SOX6	0.157895	1.09687
GO_Biological_Process_2021	regulation of calcium ion-dependent exocytosis	3/31	0.0505474	0.524639	0	0	3.86969	11.5504	SYT4;KCNB1;ADRA2A	0.0967742	1.2963			GO_Biological_Process_2021	ureteric bud development	3/19	0.0800078	0.956808	0	0	3.28786	8.30392	BMP2;SLIT2;FGFR2	0.157895	1.09687
GO_Biological_Process_2021	regulation of potassium ion transport	3/31	0.0505474	0.524639	0	0	3.86969	11.5504	KCNN2;KCNAB2;ADRA2A	0.0967742	1.2963			GO_Biological_Process_2021	endocardial cushion morphogenesis	3/19	0.0800078	0.956808	0	0	3.28786	8.30392	BMP2;SOX9;ENG	0.157895	1.09687
GO_Biological_Process_2021	activation of protein kinase B activity	3/31	0.0505474	0.524639	0	0	3.86969	11.5504	NRG1;GAS6;ADRA2A	0.0967742	1.2963			GO_Biological_Process_2021	cardiac atrium morphogenesis	3/19	0.0800078	0.956808	0	0	3.28786	8.30392	NOTCH2;BMP2;ENG	0.157895	1.09687
GO_Biological_Process_2021	cartilage development	4/52	0.0517489	0.534576	0	0	3.01226	8.92036	COL2A1;TGFB1;OSR1;ZBTB16	0.0769231	1.2861			GO_Biological_Process_2021	barbed-end actin filament capping	3/19	0.0800078	0.956808	0	0	3.28786	8.30392	SVIL;CAPG;VILL	0.157895	1.09687
GO_Biological_Process_2021	positive regulation of transcription by RNA polymerase II	33/908	0.0529007	0.538616	0	0	1.37969	4.05537	CEBPA;PID1;ONECUT2;PTPRN;GATA4;ASCL2;LITAF;ELK3;CREB3L3;HJV;PLAGL1;MYB;ESRRA;NGFR;CDKN2B;TGFB1;OSR1;LMO2;NR2F1;SMAD9;SOX11;BMP6;HEYL;DAB2;ELF4;HOXB4;IRF7;HOXB2;LMX1B;ZFPM2;NEUROG1;SKAP1;TP73	0.0363436	1.27654			GO_Biological_Process_2021	actin filament capping	3/19	0.0800078	0.956808	0	0	3.28786	8.30392	SVIL;CAPG;VILL	0.157895	1.09687
GO_Biological_Process_2021	platelet degranulation	7/125	0.0534214	0.538616	0	0	2.14859	6.29439	TF;CLEC3B;TGFB1;SERPINA1;PROS1;FLNA;GAS6	0.056	1.27228			GO_Biological_Process_2021	regulation of epithelial cell differentiation	3/19	0.0800078	0.956808	0	0	3.28786	8.30392	CEBPB;SOX9;ALOX15B	0.157895	1.09687
Reactome_2016	DCC mediated attractive signaling	2/14	0.0536157	0.799293	0	0	6.0133	17.5944	ABLIM2;ABLIM3	0.142857	1.27071			GO_Biological_Process_2021	negative regulation of metabolic process	6/56	0.0806989	0.956808	0	0	2.10631	5.30164	BTN2A2;DDIT3;ALDH1A1;NR1D1;CCDC3;MAP2K6	0.107143	1.09313
GO_Biological_Process_2021	regulation of integrin-mediated signaling pathway	2/14	0.0536157	0.538616	0	0	6.0133	17.5944	LOXL3;FLNA	0.142857	1.27071			GO_Biological_Process_2021	positive regulation of mast cell degranulation	2/9	0.081609	0.956808	0	0	5.00781	12.5487	FGR;SYK	0.222222	1.08826
GO_Biological_Process_2021	negative regulation of secretion	2/14	0.0536157	0.538616	0	0	6.0133	17.5944	NRG1;NEUROG1	0.142857	1.27071			Reactome_2016	A third proteolytic cleavage releases NICD	2/9	0.081609	0.999996	0	0	5.00781	12.5487	NOTCH2;NOTCH3	0.222222	1.08826
GO_Biological_Process_2021	neuromuscular process controlling balance	2/14	0.0536157	0.538616	0	0	6.0133	17.5944	NEUROG1;CLRN1	0.142857	1.27071			Reactome_2016	p75NTR regulates axonogenesis	2/9	0.081609	0.999996	0	0	5.00781	12.5487	LINGO1;MAG	0.222222	1.08826
GO_Biological_Process_2021	positive regulation of cardiac muscle cell proliferation	2/14	0.0536157	0.538616	0	0	6.0133	17.5944	TGFBR3;ZFPM2	0.142857	1.27071			Reactome_2016	Pregnenolone biosynthesis	2/9	0.081609	0.999996	0	0	5.00781	12.5487	STARD5;STARD6	0.222222	1.08826
GO_Biological_Process_2021	aortic valve morphogenesis	3/32	0.0546957	0.539566	0	0	3.73606	10.8569	HEYL;TGFB1;GATA4	0.09375	1.26205			GO_Biological_Process_2021	negative regulation of platelet aggregation	2/9	0.081609	0.956808	0	0	5.00781	12.5487	ADAMTS18;CD9	0.222222	1.08826
GO_Biological_Process_2021	hematopoietic progenitor cell differentiation	3/32	0.0546957	0.539566	0	0	3.73606	10.8569	TGFB1;FST;HOXB4	0.09375	1.26205			GO_Biological_Process_2021	positive regulation of B cell differentiation	2/9	0.081609	0.956808	0	0	5.00781	12.5487	MMP14;SYK	0.222222	1.08826
GO_Biological_Process_2021	cellular response to glucose stimulus	3/32	0.0546957	0.539566	0	0	3.73606	10.8569	KCNB1;PTPRN;GAS6	0.09375	1.26205			GO_Biological_Process_2021	actin-mediated cell contraction	2/9	0.081609	0.956808	0	0	5.00781	12.5487	ACTC1;CCDC88C	0.222222	1.08826
Reactome_2016	Glycolysis	3/32	0.0546957	0.799293	0	0	3.73606	10.8569	PFKFB3;PKLR;ALDOB	0.09375	1.26205			GO_Biological_Process_2021	sterol catabolic process	2/9	0.081609	0.956808	0	0	5.00781	12.5487	CYP27A1;MT3	0.222222	1.08826
GO_Biological_Process_2021	regulation of transcription involved in G1/S transition of mitotic cell cycle	3/32	0.0546957	0.539566	0	0	3.73606	10.8569	ORC1;ID2;CDC6	0.09375	1.26205			GO_Biological_Process_2021	tetrahydrofolate interconversion	2/9	0.081609	0.956808	0	0	5.00781	12.5487	SHMT1;MTHFD2L	0.222222	1.08826
KEGG_2021_Human	Glycosaminoglycan biosynthesis	4/53	0.0548275	0.677654	0	0	2.95063	8.56735	HS3ST3B1;CHSY3;HS6ST3;HS3ST2	0.0754717	1.261			GO_Biological_Process_2021	negative regulation of membrane potential	2/9	0.081609	0.956808	0	0	5.00781	12.5487	PMAIP1;RNF122	0.222222	1.08826
GO_Biological_Process_2021	supramolecular fiber organization	15/351	0.0555658	0.545691	0	0	1.62301	4.69081	P3H2;LOXL3;FIGN;MFAP4;COL2A1;TTR;DES;COL5A1;COL6A2;COL6A1;TSPAN5;VIM;FGF13;CLRN1;SNCA	0.042735	1.25519			GO_Biological_Process_2021	negative regulation of protein activation cascade	2/9	0.081609	0.956808	0	0	5.00781	12.5487	F8;SERPING1	0.222222	1.08826
Reactome_2016	Heparan sulfate/heparin (HS-GAG) metabolism	4/54	0.0580029	0.799293	0	0	2.89147	8.23278	HS3ST3B1;GPC5;HS6ST3;HS3ST2	0.0740741	1.23655			GO_Biological_Process_2021	regulation of leukocyte degranulation	2/9	0.081609	0.956808	0	0	5.00781	12.5487	SYK;FES	0.222222	1.08826
KEGG_2021_Human	Oxytocin signaling pathway	8/154	0.0582943	0.677654	0	0	1.98545	5.64316	PRKCG;GUCY1A2;CDKN1A;PRKCB;OXT;KCNJ18;KCNJ2;KCNJ3	0.0519481	1.23437			GO_Biological_Process_2021	cholesterol catabolic process	2/9	0.081609	0.956808	0	0	5.00781	12.5487	CYP27A1;MT3	0.222222	1.08826
GO_Biological_Process_2021	regulation of protein catabolic process	6/102	0.0585292	0.568869	0	0	2.26203	6.42017	PRKCG;PLK2;ADGRB1;FLNA;DTL;DACT1	0.0588235	1.23263			GO_Biological_Process_2021	organic acid catabolic process	2/9	0.081609	0.956808	0	0	5.00781	12.5487	GLYATL2;TST	0.222222	1.08826
KEGG_2021_Human	Pancreatic secretion	6/102	0.0585292	0.677654	0	0	2.26203	6.42017	PRKCG;CPB2;CCKAR;PLA2G12B;SCT;PRKCB	0.0588235	1.23263			GO_Biological_Process_2021	regulation of DNA-templated transcription in response to stress	2/9	0.081609	0.956808	0	0	5.00781	12.5487	TCIM;DDIT3	0.222222	1.08826
GO_Biological_Process_2021	apoptotic cell clearance	3/33	0.0590014	0.568869	0	0	3.61134	10.2208	ADGRB1;GAS6;XKR4	0.0909091	1.22914			GO_Biological_Process_2021	response to leptin	2/9	0.081609	0.956808	0	0	5.00781	12.5487	CCND1;NR1D1	0.222222	1.08826
Reactome_2016	Cargo concentration in the ER	3/33	0.0590014	0.799293	0	0	3.61134	10.2208	GRIA1;SERPINA1;CTSC	0.0909091	1.22914			GO_Biological_Process_2021	bone cell development	2/9	0.081609	0.956808	0	0	5.00781	12.5487	ANXA2;KIT	0.222222	1.08826
KEGG_2021_Human	Axon guidance	9/182	0.0597052	0.677654	0	0	1.88594	5.3152	NTNG2;EPHA7;CXCL12;ABLIM2;ABLIM3;SEMA3D;EPHB1;EPHA3;PLXNA4	0.0494505	1.22399			GO_Biological_Process_2021	L-ascorbic acid metabolic process	2/9	0.081609	0.956808	0	0	5.00781	12.5487	GSTO2;RGN	0.222222	1.08826
GO_Biological_Process_2021	positive regulation of protein export from nucleus	2/15	0.0607833	0.568869	0	0	5.55045	15.5437	GAS6;GTSE1	0.133333	1.21622			GO_Biological_Process_2021	regulation of transmembrane receptor protein serine/threonine kinase signaling pathway	4/31	0.08393	0.956808	0	0	2.59871	6.43902	LATS2;LTBP4;FSTL1;ENG	0.129032	1.07608
GO_Biological_Process_2021	negative regulation of androgen receptor signaling pathway	2/15	0.0607833	0.568869	0	0	5.55045	15.5437	HEYL;DAB2	0.133333	1.21622			Reactome_2016	Collagen formation	8/85	0.0882913	0.999996	0	0	1.82443	4.42809	COL18A1;COL3A1;COL13A1;COL25A1;COL5A3;SERPINH1;COL4A5;LAMC2	0.0941176	1.05408
GO_Biological_Process_2021	regulation of non-canonical Wnt signaling pathway	2/15	0.0607833	0.568869	0	0	5.55045	15.5437	RSPO3;DACT1	0.133333	1.21622			GO_Biological_Process_2021	response to lipid	10/114	0.0890241	0.956808	0	0	1.6892	4.08592	RBP4;SLC11A1;PALM3;GATA6;PELI1;LY96;IRAK3;SOX9;ABCG1;NKX3-1	0.0877193	1.05049
GO_Biological_Process_2021	catecholamine metabolic process	2/15	0.0607833	0.568869	0	0	5.55045	15.5437	TH;PAH	0.133333	1.21622			KEGG_2021_Human	One carbon pool by folate	3/20	0.0905017	0.999994	0	0	3.09429	7.43369	SHMT1;MTHFD2L;AMT	0.15	1.04334
GO_Biological_Process_2021	regulation of integrin activation	2/15	0.0607833	0.568869	0	0	5.55045	15.5437	PTGER4;SKAP1	0.133333	1.21622			GO_Biological_Process_2021	positive regulation of lymphocyte differentiation	3/20	0.0905017	0.956808	0	0	3.09429	7.43369	ZAP70;MMP14;SYK	0.15	1.04334
GO_Biological_Process_2021	engulfment of apoptotic cell	2/15	0.0607833	0.568869	0	0	5.55045	15.5437	ADGRB1;XKR4	0.133333	1.21622			GO_Biological_Process_2021	positive regulation of cyclin-dependent protein kinase activity	3/20	0.0905017	0.956808	0	0	3.09429	7.43369	CCND2;RGCC;CCND1	0.15	1.04334
GO_Biological_Process_2021	regulation of secretion	2/15	0.0607833	0.568869	0	0	5.55045	15.5437	OPRK1;NRG1	0.133333	1.21622			GO_Biological_Process_2021	oligodendrocyte differentiation	3/20	0.0905017	0.956808	0	0	3.09429	7.43369	SOX13;SOX9;SOX6	0.15	1.04334
GO_Biological_Process_2021	response to ethanol	2/15	0.0607833	0.568869	0	0	5.55045	15.5437	GLRA1;TH	0.133333	1.21622			GO_Biological_Process_2021	myeloid cell development	3/20	0.0905017	0.956808	0	0	3.09429	7.43369	ALAS2;ANXA2;KIT	0.15	1.04334
GO_Biological_Process_2021	myoblast fusion	2/15	0.0607833	0.568869	0	0	5.55045	15.5437	ADAMTS5;ADGRB3	0.133333	1.21622			GO_Biological_Process_2021	ganglioside metabolic process	3/20	0.0905017	0.956808	0	0	3.09429	7.43369	HEXB;ST8SIA4;ST6GALNAC5	0.15	1.04334
Reactome_2016	WNT5A-dependent internalization of FZD4	2/15	0.0607833	0.799293	0	0	5.55045	15.5437	PRKCG;PRKCB	0.133333	1.21622			GO_Biological_Process_2021	regulation of protein kinase A signaling	3/20	0.0905017	0.956808	0	0	3.09429	7.43369	AKAP12;TCIM;PRKAR2B	0.15	1.04334
Reactome_2016	Eicosanoid ligand-binding receptors	2/15	0.0607833	0.799293	0	0	5.55045	15.5437	PTGER4;CYSLTR2	0.133333	1.21622			GO_Biological_Process_2021	extracellular matrix organization	22/300	0.0910361	0.956808	0	0	1.393	3.33832	COL18A1;COL13A1;COL25A1;LAMA1;MMP2;FN1;CAPG;LAMC2;NID1;MMP11;MMP14;COL3A1;CDH1;ADAMTS18;COL5A3;SPOCK2;MMP17;ITGA11;SERPINH1;COL4A5;ITGA7;LCP1	0.0733333	1.04079
Reactome_2016	Association of licensing factors with the pre-replicative complex	2/15	0.0607833	0.799293	0	0	5.55045	15.5437	ORC1;CDC6	0.133333	1.21622			Reactome_2016	DAG and IP3 signaling	4/32	0.0920191	0.999996	0	0	2.50577	5.97816	PDE1C;PRKAR2B;ADCY4;ITPR2	0.125	1.03612
Reactome_2016	GABA receptor activation	4/55	0.0612746	0.799293	0	0	2.83463	7.91539	GABRB3;GABRG2;KCNJ2;KCNJ3	0.0727273	1.21272			Reactome_2016	Signaling by Robo receptor	4/32	0.0920191	0.999996	0	0	2.50577	5.97816	PAK6;SLIT2;SRGAP3;SRGAP1	0.125	1.03612
GO_Biological_Process_2021	axonogenesis	11/240	0.0625706	0.57705	0	0	1.74285	4.83025	NTNG2;DOK1;EPHA7;CXCL12;DAB1;DSCAM;SEMA3D;SLITRK1;ADGRB1;EPHB1;EPHA3	0.0458333	1.20363			GO_Biological_Process_2021	metal ion export	4/32	0.0920191	0.956808	0	0	2.50577	5.97816	SLC11A1;KCNQ1;SLC40A1;ATP2B4	0.125	1.03612
GO_Biological_Process_2021	synaptic vesicle recycling	3/34	0.0634614	0.57705	0	0	3.49466	9.63592	NLGN1;SNCB;SNCA	0.0882353	1.19749			GO_Biological_Process_2021	endodermal cell differentiation	4/32	0.0920191	0.956808	0	0	2.50577	5.97816	MMP14;MMP2;FN1;ITGA7	0.125	1.03612
GO_Biological_Process_2021	axoneme assembly	3/34	0.0634614	0.57705	0	0	3.49466	9.63592	RSPH4A;DNAAF6;DRC1	0.0882353	1.19749			GO_Biological_Process_2021	chondrocyte differentiation	4/32	0.0920191	0.956808	0	0	2.50577	5.97816	BMP2;NFIB;SOX9;SOX6	0.125	1.03612
GO_Biological_Process_2021	DNA damage response, signal transduction by p53 class mediator resulting in cell cycle arrest	4/56	0.0646419	0.57705	0	0	2.77997	7.61405	CDKN1A;PLAGL1;PLK2;GTSE1	0.0714286	1.18949			GO_Biological_Process_2021	cardiac muscle tissue morphogenesis	4/32	0.0920191	0.956808	0	0	2.50577	5.97816	BMP2;ACTC1;FGFR2;ENG	0.125	1.03612
GO_Biological_Process_2021	extracellular matrix organization	13/300	0.065314	0.57705	0	0	1.64473	4.48773	TGFB1;LAMC3;P3H2;LOXL3;ADAMTS20;ADAMTS5;COL2A1;TTR;COL5A1;COL6A2;COL6A1;GAS6;FBN1	0.0433333	1.18499			GO_Biological_Process_2021	membrane lipid biosynthetic process	6/58	0.0920871	0.956808	0	0	2.02508	4.82986	PPM1L;SPTLC3;B3GNT5;SPNS2;DEGS2;HACD4	0.103448	1.0358
GO_Biological_Process_2021	cellular response to metal ion	7/131	0.0653848	0.57705	0	0	2.04399	5.57492	CPNE8;SYT4;GLRA1;TF;NLGN1;BMP6;SNCA	0.0534351	1.18452			GO_Biological_Process_2021	chordate embryonic development	6/58	0.0920871	0.956808	0	0	2.02508	4.82986	TRIM71;RBP4;BMP2;GRHL2;FGFR2;FGFR1	0.103448	1.0358
GO_Biological_Process_2021	positive regulation of protein serine/threonine kinase activity	6/106	0.0679289	0.57705	0	0	2.1711	5.83873	CEMIP;TGFB1;DIRAS2;ADRA2A;SLC8A2;SNCA	0.0566038	1.16795			GO_Biological_Process_2021	eye development	6/58	0.0920871	0.956808	0	0	2.02508	4.82986	SIX6;RBP4;MEIS1;LAMA1;ADAMTS18;MEIS2	0.103448	1.0358
GO_Biological_Process_2021	semaphorin-plexin signaling pathway	3/35	0.0680725	0.57705	0	0	3.38528	9.09687	SEMA3D;FLNA;PLXNA4	0.0857143	1.16703			GO_Biological_Process_2021	cell junction organization	7/72	0.0935028	0.956808	0	0	1.89053	4.48011	NLGN3;PPFIBP2;MARVELD3;SNCG;GRHL2;TJP3;CBLN1	0.0972222	1.02918
GO_Biological_Process_2021	negative regulation of cell cycle G1/S phase transition	3/35	0.0680725	0.57705	0	0	3.38528	9.09687	CDKN1A;CDKN2B;DACT1	0.0857143	1.16703			GO_Biological_Process_2021	negative regulation of Wnt signaling pathway	15/191	0.0943568	0.956808	0	0	1.49851	3.5375	WWTR1;DRAXIN;PTPRU;TCF7L2;TPBG;FZD6;SOX13;KREMEN1;STK3;BMP2;LATS2;FRZB;DDIT3;CCDC88C;SOX9	0.078534	1.02523
GO_Biological_Process_2021	lung development	3/35	0.0680725	0.57705	0	0	3.38528	9.09687	CEBPA;LOXL3;SOX11	0.0857143	1.16703			GO_Biological_Process_2021	positive regulation of tyrosine phosphorylation of STAT protein	6/59	0.0980898	0.956808	0	0	1.98677	4.61302	SOCS3;CD40;CTF1;KIT;STAP2;TNFRSF1A	0.101695	1.00838
GO_Biological_Process_2021	regulation of postsynaptic membrane potential	3/35	0.0680725	0.57705	0	0	3.38528	9.09687	GLRA1;GRID2;GABRG2	0.0857143	1.16703			KEGG_2021_Human	Synthesis and degradation of ketone bodies	2/10	0.0984633	0.999994	0	0	4.3816	10.1569	BDH2;BDH1	0.2	1.00673
GO_Biological_Process_2021	regulation of ion transmembrane transport	3/35	0.0680725	0.57705	0	0	3.38528	9.09687	KCNJ18;KCNJ2;KCNJ3	0.0857143	1.16703			GO_Biological_Process_2021	lung epithelium development	2/10	0.0984633	0.956808	0	0	4.3816	10.1569	ERRFI1;GRHL2	0.2	1.00673
GO_Biological_Process_2021	regulation of bone mineralization	4/57	0.068104	0.57705	0	0	2.72738	7.32771	NELL1;TGFB1;OSR1;BMP6	0.0701754	1.16683			GO_Biological_Process_2021	positive regulation by symbiont of entry into host	2/10	0.0984633	0.956808	0	0	4.3816	10.1569	TMPRSS2;TRIM38	0.2	1.00673
GO_Biological_Process_2021	regulation of activin receptor signaling pathway	2/16	0.0682557	0.57705	0	0	5.15372	13.8351	FST;DACT1	0.125	1.16586			GO_Biological_Process_2021	pinocytosis	2/10	0.0984633	0.956808	0	0	4.3816	10.1569	RAB34;SNX33	0.2	1.00673
GO_Biological_Process_2021	regulation of ATP biosynthetic process	2/16	0.0682557	0.57705	0	0	5.15372	13.8351	PID1;AK4	0.125	1.16586			GO_Biological_Process_2021	neuron projection fasciculation	2/10	0.0984633	0.956808	0	0	4.3816	10.1569	SEMA5A;CNTN4	0.2	1.00673
GO_Biological_Process_2021	regulation of hormone secretion	2/16	0.0682557	0.57705	0	0	5.15372	13.8351	CCKAR;SOX11	0.125	1.16586			GO_Biological_Process_2021	negative regulation of transforming growth factor beta production	2/10	0.0984633	0.956808	0	0	4.3816	10.1569	FN1;GATA6	0.2	1.00673
GO_Biological_Process_2021	dendritic spine morphogenesis	2/16	0.0682557	0.57705	0	0	5.15372	13.8351	DOCK10;EPHB1	0.125	1.16586			GO_Biological_Process_2021	negative regulation of protein autophosphorylation	2/10	0.0984633	0.956808	0	0	4.3816	10.1569	ERRFI1;ENG	0.2	1.00673
Reactome_2016	Cell-extracellular matrix interactions	2/16	0.0682557	0.85247	0	0	5.15372	13.8351	FLNA;PARVB	0.125	1.16586			GO_Biological_Process_2021	negative regulation of extracellular matrix organization	2/10	0.0984633	0.956808	0	0	4.3816	10.1569	DPP4;TNFRSF1A	0.2	1.00673
Reactome_2016	CRMPs in Sema3A signaling	2/16	0.0682557	0.85247	0	0	5.15372	13.8351	DPYSL3;PLXNA4	0.125	1.16586			GO_Biological_Process_2021	myelin assembly	2/10	0.0984633	0.956808	0	0	4.3816	10.1569	CD9;NCMAP	0.2	1.00673
GO_Biological_Process_2021	digestive tract morphogenesis	2/16	0.0682557	0.57705	0	0	5.15372	13.8351	ID2;SOX11	0.125	1.16586			GO_Biological_Process_2021	serine family amino acid catabolic process	2/10	0.0984633	0.956808	0	0	4.3816	10.1569	SHMT1;AMT	0.2	1.00673
GO_Biological_Process_2021	epiboly involved in wound healing	2/16	0.0682557	0.57705	0	0	5.15372	13.8351	TMEFF2;FLNA	0.125	1.16586			GO_Biological_Process_2021	smooth muscle tissue development	2/10	0.0984633	0.956808	0	0	4.3816	10.1569	EFEMP2;ENG	0.2	1.00673
GO_Biological_Process_2021	glutamine family amino acid catabolic process	2/16	0.0682557	0.57705	0	0	5.15372	13.8351	DDAH1;GAD1	0.125	1.16586			GO_Biological_Process_2021	positive regulation of viral entry into host cell	2/10	0.0984633	0.956808	0	0	4.3816	10.1569	TMPRSS2;TRIM38	0.2	1.00673
GO_Biological_Process_2021	positive regulation of collagen biosynthetic process	2/16	0.0682557	0.57705	0	0	5.15372	13.8351	TGFB1;VIM	0.125	1.16586			GO_Biological_Process_2021	removal of superoxide radicals	2/10	0.0984633	0.956808	0	0	4.3816	10.1569	MT3;SOD3	0.2	1.00673
GO_Biological_Process_2021	transmembrane receptor protein serine/threonine kinase signaling pathway	7/133	0.0697046	0.57705	0	0	2.01134	5.35718	TGFBR3;TGFB1;ACVR1C;HPGD;HJV;SMAD9;BMP6	0.0526316	1.15674			GO_Biological_Process_2021	regulation of low-density lipoprotein particle clearance	2/10	0.0984633	0.956808	0	0	4.3816	10.1569	ANXA2;FGF21	0.2	1.00673
GO_Biological_Process_2021	cell-cell junction organization	5/82	0.0713766	0.57705	0	0	2.34808	6.19843	CDH4;TGFB1;CDH9;CDH17;CDH7	0.0609756	1.14644			GO_Biological_Process_2021	regulation of long-term synaptic depression	2/10	0.0984633	0.956808	0	0	4.3816	10.1569	ARC;CBLN1	0.2	1.00673
GO_Biological_Process_2021	negative regulation of neuron projection development	4/58	0.07166	0.57705	0	0	2.67674	7.0554	KANK1;NGFR;NLGN1;DPYSL3	0.0689655	1.14472			GO_Biological_Process_2021	regulation of hydrogen peroxide-induced cell death	2/10	0.0984633	0.956808	0	0	4.3816	10.1569	GPR37;STK26	0.2	1.00673
GO_Biological_Process_2021	regulation of neurotransmitter receptor activity	4/58	0.07166	0.57705	0	0	2.67674	7.0554	GRIA1;NLGN1;SHISA9;DLGAP2	0.0689655	1.14472			GO_Biological_Process_2021	regulation of cell activation	2/10	0.0984633	0.956808	0	0	4.3816	10.1569	TEC;SYK	0.2	1.00673
GO_Biological_Process_2021	regulation of pathway-restricted SMAD protein phosphorylation	4/58	0.07166	0.57705	0	0	2.67674	7.0554	DAB2;TGFB1;LDLRAD4;BMP6	0.0689655	1.14472			GO_Biological_Process_2021	positive regulation of lipase activity	2/10	0.0984633	0.956808	0	0	4.3816	10.1569	FGFR2;FGFR1	0.2	1.00673
GO_Biological_Process_2021	chordate embryonic development	4/58	0.07166	0.57705	0	0	2.67674	7.0554	KIAA1217;TGFB1;LMX1B;DACT1	0.0689655	1.14472			GO_Biological_Process_2021	positive regulation of mesenchymal cell proliferation	2/10	0.0984633	0.956808	0	0	4.3816	10.1569	SOX9;FGFR2	0.2	1.00673
GO_Biological_Process_2021	aortic valve development	3/36	0.0728312	0.57705	0	0	3.28253	8.59895	HEYL;TGFB1;GATA4	0.0833333	1.13768			Reactome_2016	POU5F1 (OCT4), SOX2, NANOG repress genes related to differentiation	2/10	0.0984633	0.999996	0	0	4.3816	10.1569	CDX2;GATA6	0.2	1.00673
GO_Biological_Process_2021	regulation of cell cycle G1/S phase transition	3/36	0.0728312	0.57705	0	0	3.28253	8.59895	CDKN1A;ID2;TM4SF5	0.0833333	1.13768			Reactome_2016	Beta-oxidation of pristanoyl-CoA	2/10	0.0984633	0.999996	0	0	4.3816	10.1569	ACOX2;CROT	0.2	1.00673
KEGG_2021_Human	HIF-1 signaling pathway	6/109	0.0755211	0.802074	0	0	2.10754	5.4445	PRKCG;TF;CDKN1A;PFKFB3;PRKCB;ALDOB	0.0550459	1.12193			Reactome_2016	TRIF-mediated programmed cell death	2/10	0.0984633	0.999996	0	0	4.3816	10.1569	LY96;TLR3	0.2	1.00673
GO_Biological_Process_2021	adenylate cyclase-activating adrenergic receptor signaling pathway	2/17	0.0760114	0.57705	0	0	4.80989	12.3945	GPR101;ADRA2A	0.117647	1.11912			GO_Biological_Process_2021	negative regulation of cell adhesion	7/73	0.0988736	0.956808	0	0	1.86179	4.30802	SEMA5A;SEMA6A;ANGPT1;CDH1;FZD7;CORO2B;RND1	0.0958904	1.00492
GO_Biological_Process_2021	pyrimidine-containing compound catabolic process	2/17	0.0760114	0.57705	0	0	4.80989	12.3945	NT5E;DPYSL3	0.117647	1.11912			GO_Biological_Process_2021	endocardial cushion development	3/21	0.101533	0.956808	0	0	2.92223	6.68424	BMP2;SOX9;ENG	0.142857	0.993395
GO_Biological_Process_2021	DNA replication checkpoint signaling	2/17	0.0760114	0.57705	0	0	4.80989	12.3945	ORC1;CDC6	0.117647	1.11912			GO_Biological_Process_2021	positive regulation of smoothened signaling pathway	3/21	0.101533	0.956808	0	0	2.92223	6.68424	EVC;RAB34;DCDC2	0.142857	0.993395
GO_Biological_Process_2021	regulation of receptor recycling	2/17	0.0760114	0.57705	0	0	4.80989	12.3945	BVES;SNCA	0.117647	1.11912			GO_Biological_Process_2021	hydrogen peroxide catabolic process	3/21	0.101533	0.956808	0	0	2.92223	6.68424	HBM;HBE1;HBB	0.142857	0.993395
GO_Biological_Process_2021	stem cell development	2/17	0.0760114	0.57705	0	0	4.80989	12.3945	NRG1;SOX11	0.117647	1.11912			Reactome_2016	HS-GAG degradation	3/21	0.101533	0.999996	0	0	2.92223	6.68424	SDC3;GPC2;GPC4	0.142857	0.993395
GO_Biological_Process_2021	negative regulation of insulin secretion	2/17	0.0760114	0.57705	0	0	4.80989	12.3945	KCNB1;ADRA2A	0.117647	1.11912			GO_Biological_Process_2021	sensory perception of mechanical stimulus	8/88	0.10283	0.956808	0	0	1.75573	3.99372	TMIE;GRM7;HOMER2;KCNQ1;MYH14;DCDC2;LHFPL3;ATP6V1B1	0.0909091	0.987879
GO_Biological_Process_2021	negative regulation of vascular associated smooth muscle cell proliferation	2/17	0.0760114	0.57705	0	0	4.80989	12.3945	CDKN1A;PRKG1	0.117647	1.11912			GO_Biological_Process_2021	collagen fibril organization	8/89	0.107956	0.956808	0	0	1.73396	3.85986	COL18A1;COL3A1;COL13A1;COL25A1;COL5A3;SERPINH1;COL4A5;LAMC2	0.0898876	0.966754
GO_Biological_Process_2021	positive regulation of cardiac muscle tissue growth	2/17	0.0760114	0.57705	0	0	4.80989	12.3945	TGFBR3;ZFPM2	0.117647	1.11912			Reactome_2016	Phospholipase C-mediated cascade: FGFR1	5/47	0.108407	0.999996	0	0	2.08853	4.64043	PDE1C;PRKAR2B;ADCY4;ITPR2;FGFR1	0.106383	0.964941
GO_Biological_Process_2021	positive regulation of collagen metabolic process	2/17	0.0760114	0.57705	0	0	4.80989	12.3945	TGFB1;VIM	0.117647	1.11912			GO_Biological_Process_2021	epithelial to mesenchymal transition	5/47	0.108407	0.956808	0	0	2.08853	4.64043	BMP2;AKNA;SOX9;ENG;FGFR1	0.106383	0.964941
GO_Biological_Process_2021	positive regulation of stem cell differentiation	2/17	0.0760114	0.57705	0	0	4.80989	12.3945	HOXB4;GATA4	0.117647	1.11912			Reactome_2016	EPHA-mediated growth cone collapse	4/34	0.109252	0.999996	0	0	2.33847	5.17761	MYH14;EFNA4;MYL9;NGEF	0.117647	0.961572
GO_Biological_Process_2021	cellular biogenic amine biosynthetic process	2/17	0.0760114	0.57705	0	0	4.80989	12.3945	TH;PAH	0.117647	1.11912			Reactome_2016	PLC-gamma1 signalling	4/34	0.109252	0.999996	0	0	2.33847	5.17761	PDE1C;PRKAR2B;ADCY4;ITPR2	0.117647	0.961572
GO_Biological_Process_2021	cell surface receptor signaling pathway involved in heart development	2/17	0.0760114	0.57705	0	0	4.80989	12.3945	HEYL;TGFB1	0.117647	1.11912			Reactome_2016	EGFR interacts with phospholipase C-gamma	4/34	0.109252	0.999996	0	0	2.33847	5.17761	PDE1C;PRKAR2B;ADCY4;ITPR2	0.117647	0.961572
Reactome_2016	G1/S-Specific Transcription	2/17	0.0760114	0.918209	0	0	4.80989	12.3945	ORC1;CDC6	0.117647	1.11912			GO_Biological_Process_2021	positive regulation of peptidyl-tyrosine phosphorylation	11/134	0.109878	0.956808	0	0	1.57097	3.46932	SOCS3;CD40;GPRC5B;CTF1;TEC;ANGPT1;KIT;STAP2;ARHGEF2;FCGR1A;TNFRSF1A	0.0820896	0.959089
GO_Biological_Process_2021	negative regulation of inflammatory response to antigenic stimulus	7/136	0.0764967	0.57705	0	0	1.96426	5.04915	PTGER4;ADCYAP1R1;CYSLTR2;SCT;PLK2;RLN3;AVP	0.0514706	1.11636			GO_Biological_Process_2021	iron ion homeostasis	6/61	0.110699	0.956808	0	0	1.91432	4.2133	ALAS2;BDH2;SLC11A1;SLC40A1;CYBRD1;CP	0.0983607	0.955857
KEGG_2021_Human	Alanine, aspartate and glutamate metabolism	3/37	0.0777341	0.802074	0	0	3.18582	8.13805	GAD1;GFPT2;ASS1	0.0810811	1.10939			GO_Biological_Process_2021	cellular response to osmotic stress	3/22	0.113067	0.956808	0	0	2.76828	6.03424	ARHGEF2;YBX3;LRRC8E	0.136364	0.946665
GO_Biological_Process_2021	phagocytosis, engulfment	3/37	0.0777341	0.57705	0	0	3.18582	8.13805	ADGRB1;XKR4;GULP1	0.0810811	1.10939			GO_Biological_Process_2021	regulation of membrane protein ectodomain proteolysis	3/22	0.113067	0.956808	0	0	2.76828	6.03424	PACSIN3;SNX33;TIMP4	0.136364	0.946665
GO_Biological_Process_2021	negative regulation of G1/S transition of mitotic cell cycle	3/37	0.0777341	0.57705	0	0	3.18582	8.13805	CDKN1A;CDKN2B;DACT1	0.0810811	1.10939			GO_Biological_Process_2021	negative regulation of interleukin-2 production	3/22	0.113067	0.956808	0	0	2.76828	6.03424	ZFP36;HOMER2;HOMER3	0.136364	0.946665
Reactome_2016	Defective B3GALTL causes Peters-plus syndrome (PpS)	3/37	0.0777341	0.918209	0	0	3.18582	8.13805	ADAMTS5;THSD1;ADAMTS20	0.0810811	1.10939			GO_Biological_Process_2021	negative regulation of myeloid cell differentiation	3/22	0.113067	0.956808	0	0	2.76828	6.03424	MEIS1;ZFP36;MEIS2	0.136364	0.946665
GO_Biological_Process_2021	regulation of inflammatory response to antigenic stimulus	7/137	0.0788439	0.57705	0	0	1.94905	4.95114	PTGER4;ADCYAP1R1;CYSLTR2;SCT;PLK2;RLN3;AVP	0.0510949	1.10323			GO_Biological_Process_2021	protein localization to cell junction	3/22	0.113067	0.956808	0	0	2.76828	6.03424	MARVELD3;TJP3;NECTIN1	0.136364	0.946665
GO_Biological_Process_2021	homophilic cell adhesion via plasma membrane adhesion molecules	4/60	0.07905	0.57705	0	0	2.58087	6.54942	PTPRT;CDH4;DSCAM;CDH17	0.0666667	1.1021			Reactome_2016	Common Pathway of Fibrin Clot Formation	3/22	0.113067	0.999996	0	0	2.76828	6.03424	PROCR;F8;F5	0.136364	0.946665
Reactome_2016	Collagen formation	5/85	0.0805018	0.918209	0	0	2.25968	5.69321	COL2A1;COL5A1;COL6A2;COL6A1;LOXL3	0.0588235	1.09419			GO_Biological_Process_2021	negative regulation of translation, ncRNA-mediated	2/11	0.116179	0.956808	0	0	3.89455	8.38349	TRIM71;ZFP36	0.181818	0.934871
GO_Biological_Process_2021	positive regulation of signal transduction	11/252	0.0818488	0.57705	0	0	1.65504	4.14236	JAG2;KANK1;NLGN1;PRKCB;LOXL3;TSPAN5;RSPO3;FLNA;GAS6;BMP6;DACT1	0.0436508	1.08699			GO_Biological_Process_2021	regulation of myeloid leukocyte mediated immunity	2/11	0.116179	0.956808	0	0	3.89455	8.38349	SYK;FES	0.181818	0.934871
GO_Biological_Process_2021	synaptic vesicle endocytosis	3/38	0.0827774	0.57705	0	0	3.09464	7.7106	NLGN1;SNCB;SNCA	0.0789474	1.08209			GO_Biological_Process_2021	positive regulation of chondrocyte differentiation	2/11	0.116179	0.956808	0	0	3.89455	8.38349	SOX9;SOX6	0.181818	0.934871
Reactome_2016	O-glycosylation of TSR domain-containing proteins	3/38	0.0827774	0.918209	0	0	3.09464	7.7106	ADAMTS5;THSD1;ADAMTS20	0.0789474	1.08209			GO_Biological_Process_2021	positive regulation of cellular respiration	2/11	0.116179	0.956808	0	0	3.89455	8.38349	IFNLR1;NUPR1	0.181818	0.934871
GO_Biological_Process_2021	regulation of endocytosis	4/61	0.0828818	0.57705	0	0	2.53546	6.31417	DAB2;CALY;EPHA3;SNCA	0.0655738	1.08154			GO_Biological_Process_2021	negative regulation of response to cytokine stimulus	2/11	0.116179	0.956808	0	0	3.89455	8.38349	PALM3;IRAK3	0.181818	0.934871
GO_Biological_Process_2021	regulation of presynapse assembly	2/18	0.0840295	0.57705	0	0	4.50904	11.167	SLITRK1;SNCA	0.111111	1.07557			GO_Biological_Process_2021	negative regulation of homotypic cell-cell adhesion	2/11	0.116179	0.956808	0	0	3.89455	8.38349	ADAMTS18;CD9	0.181818	0.934871
GO_Biological_Process_2021	positive regulation of synaptic transmission, glutamatergic	2/18	0.0840295	0.57705	0	0	4.50904	11.167	NLGN1;TSHZ3	0.111111	1.07557			GO_Biological_Process_2021	miRNA mediated inhibition of translation	2/11	0.116179	0.956808	0	0	3.89455	8.38349	TRIM71;ZFP36	0.181818	0.934871
GO_Biological_Process_2021	regulation of adaptive immune response	2/18	0.0840295	0.57705	0	0	4.50904	11.167	IRF7;SKAP1	0.111111	1.07557			GO_Biological_Process_2021	tetrahydrofolate metabolic process	2/11	0.116179	0.956808	0	0	3.89455	8.38349	SHMT1;MTHFD2L	0.181818	0.934871
GO_Biological_Process_2021	regulation of cellular protein catabolic process	2/18	0.0840295	0.57705	0	0	4.50904	11.167	NELL1;DACT1	0.111111	1.07557			GO_Biological_Process_2021	positive regulation of dendrite development	2/11	0.116179	0.956808	0	0	3.89455	8.38349	PTN;VLDLR	0.181818	0.934871
GO_Biological_Process_2021	regulation of presynapse organization	2/18	0.0840295	0.57705	0	0	4.50904	11.167	SLITRK1;SNCA	0.111111	1.07557			GO_Biological_Process_2021	regulation of pH	2/11	0.116179	0.956808	0	0	3.89455	8.38349	PDK4;ATP6V1B1	0.181818	0.934871
GO_Biological_Process_2021	fluid transport	2/18	0.0840295	0.57705	0	0	4.50904	11.167	AVP;UPK3A	0.111111	1.07557			GO_Biological_Process_2021	regulation of phospholipase activity	2/11	0.116179	0.956808	0	0	3.89455	8.38349	FGFR2;FGFR1	0.181818	0.934871
GO_Biological_Process_2021	hyaluronan catabolic process	2/18	0.0840295	0.57705	0	0	4.50904	11.167	CEMIP;TGFB1	0.111111	1.07557			GO_Biological_Process_2021	regulation of mesenchymal cell proliferation	2/11	0.116179	0.956808	0	0	3.89455	8.38349	SOX9;FGFR2	0.181818	0.934871
GO_Biological_Process_2021	intermediate filament organization	2/18	0.0840295	0.57705	0	0	4.50904	11.167	DES;VIM	0.111111	1.07557			GO_Biological_Process_2021	cellular response to superoxide	2/11	0.116179	0.956808	0	0	3.89455	8.38349	MT3;SOD3	0.181818	0.934871
GO_Biological_Process_2021	water transport	2/18	0.0840295	0.57705	0	0	4.50904	11.167	AVP;UPK3A	0.111111	1.07557			GO_Biological_Process_2021	regulation of coagulation	2/11	0.116179	0.956808	0	0	3.89455	8.38349	PROCR;HS3ST5	0.181818	0.934871
GO_Biological_Process_2021	negative regulation of peptide hormone secretion	2/18	0.0840295	0.57705	0	0	4.50904	11.167	KCNB1;ADRA2A	0.111111	1.07557			GO_Biological_Process_2021	regulation of cardiac muscle cell apoptotic process	2/11	0.116179	0.956808	0	0	3.89455	8.38349	NUPR1;ENG	0.181818	0.934871
GO_Biological_Process_2021	positive regulation of glial cell differentiation	2/18	0.0840295	0.57705	0	0	4.50904	11.167	TGFB1;ID2	0.111111	1.07557			GO_Biological_Process_2021	alcohol catabolic process	2/11	0.116179	0.956808	0	0	3.89455	8.38349	CYP27A1;MT3	0.181818	0.934871
GO_Biological_Process_2021	regulation of neurogenesis	4/62	0.0868033	0.57705	0	0	2.49162	6.0898	HEYL;RGS14;SOX11;ASCL2	0.0645161	1.06146			GO_Biological_Process_2021	positive regulation of myelination	2/11	0.116179	0.956808	0	0	3.89455	8.38349	EGR2;NCMAP	0.181818	0.934871
Reactome_2016	Diseases associated with O-glycosylation of proteins	4/62	0.0868033	0.918209	0	0	2.49162	6.0898	ADAMTS5;MUC13;THSD1;ADAMTS20	0.0645161	1.06146			GO_Biological_Process_2021	positive regulation of cell cycle G1/S phase transition	4/35	0.11837	0.956808	0	0	2.26292	4.82893	CCND2;RGCC;CCND1;AIF1	0.114286	0.926758
Reactome_2016	Platelet homeostasis	5/87	0.0869144	0.918209	0	0	2.20434	5.38482	GUCY1A2;PDE10A;PRKG2;PRKG1;SLC8A2	0.0574713	1.06091			GO_Biological_Process_2021	negative regulation of neurogenesis	4/35	0.11837	0.956808	0	0	2.26292	4.82893	LINGO1;MAG;EFNB3;PTN	0.114286	0.926758
Reactome_2016	Factors involved in megakaryocyte development and platelet production	7/141	0.088647	0.918209	0	0	1.89048	4.5808	DOCK10;KIF26A;KIF4A;MYB;IRF7;GATA4;ZFPM2	0.0496454	1.05234			GO_Biological_Process_2021	negative regulation of epithelial cell migration	4/35	0.11837	0.956808	0	0	2.26292	4.82893	MARVELD3;TACSTD2;STC1;SLIT2	0.114286	0.926758
GO_Biological_Process_2021	positive regulation of cellular component organization	6/114	0.0891992	0.57705	0	0	2.00945	4.85661	DAB2;TGFB1;CALY;NRG1;TRABD2B;SNCA	0.0526316	1.04964			KEGG_2021_Human	Arrhythmogenic right ventricular cardiomyopathy	7/77	0.121993	0.999994	0	0	1.75503	3.69221	TCF7L2;JUP;LAMA1;ITGA11;ATP2A3;ITGA7;DMD	0.0909091	0.913664
KEGG_2021_Human	Glutamatergic synapse	6/114	0.0891992	0.810517	0	0	2.00945	4.85661	PRKCG;GRIA1;PRKCB;GRIK3;GRIK2;KCNJ3	0.0526316	1.04964			Reactome_2016	Phospholipase C-mediated cascade; FGFR2	5/49	0.123729	0.999996	0	0	1.99339	4.16551	PDE1C;PRKAR2B;ADCY4;ITPR2;FGFR2	0.102041	0.907529
KEGG_2021_Human	Gap junction	5/88	0.090218	0.810517	0	0	2.17767	5.23843	PRKCG;GUCY1A2;PRKCB;PRKG2;PRKG1	0.0568182	1.04471			GO_Biological_Process_2021	aminoglycan biosynthetic process	5/49	0.123729	0.956808	0	0	1.99339	4.16551	SDC3;GPC2;HS3ST5;GPC4;HS3ST1	0.102041	0.907529
Reactome_2016	Diseases of glycosylation	5/88	0.090218	0.918209	0	0	2.17767	5.23843	ADAMTS5;MUC13;GPC5;THSD1;ADAMTS20	0.0568182	1.04471			GO_Biological_Process_2021	adherens junction organization	5/49	0.123729	0.956808	0	0	1.99339	4.16551	JUP;CDH1;CDH12;DCHS1;NECTIN1	0.102041	0.907529
GO_Biological_Process_2021	anterior/posterior pattern specification	4/63	0.0908131	0.57705	0	0	2.44926	5.87566	HEYL;HOXB4;GATA4;NEUROG1	0.0634921	1.04185			Reactome_2016	The canonical retinoid cycle in rods (twilight vision)	3/23	0.12507	0.999996	0	0	2.62973	5.46691	RBP4;CYP4V2;RDH16	0.130435	0.902848
Reactome_2016	Collagen biosynthesis and modifying enzymes	4/63	0.0908131	0.918209	0	0	2.44926	5.87566	COL2A1;COL5A1;COL6A2;COL6A1	0.0634921	1.04185			Reactome_2016	RNA Polymerase III Transcription Termination	3/23	0.12507	0.999996	0	0	2.62973	5.46691	NFIX;NFIA;NFIB	0.130435	0.902848
Reactome_2016	G alpha (s) signalling events	7/142	0.0912009	0.918209	0	0	1.87638	4.49334	PTGER4;ADCYAP1R1;PDE10A;SCT;PDE4B;RLN3;AVP	0.0492958	1.04			GO_Biological_Process_2021	blood vessel endothelial cell migration	3/23	0.12507	0.956808	0	0	2.62973	5.46691	EGR3;SLIT2;EPHB4	0.130435	0.902848
GO_Biological_Process_2021	negative regulation of cell population proliferation	15/379	0.0922468	0.57705	0	0	1.49597	3.56533	CEBPA;CDKN1A;CDKN2B;TGFB1;P3H2;SOX11;CDC6;PTPN14;TGFBR3;NELL1;ACVR1C;DDAH1;CLMN;ADGRB1;TP73	0.0395778	1.03505			GO_Biological_Process_2021	regulation of interleukin-4 production	3/23	0.12507	0.956808	0	0	2.62973	5.46691	CEBPB;SYK;DDIT3	0.130435	0.902848
GO_Biological_Process_2021	regulation of nervous system process	2/19	0.0922902	0.57705	0	0	4.24359	10.1117	DLGAP2;SLC8A2	0.105263	1.03484			GO_Biological_Process_2021	regulation of mononuclear cell migration	3/23	0.12507	0.956808	0	0	2.62973	5.46691	LGALS3;SLIT2;AIF1	0.130435	0.902848
GO_Biological_Process_2021	activin receptor signaling pathway	2/19	0.0922902	0.57705	0	0	4.24359	10.1117	ACVR1C;HJV	0.105263	1.03484			GO_Biological_Process_2021	regulation of necroptotic process	3/23	0.12507	0.956808	0	0	2.62973	5.46691	PELI1;ARHGEF2;YBX3	0.130435	0.902848
GO_Biological_Process_2021	aspartate family amino acid catabolic process	2/19	0.0922902	0.57705	0	0	4.24359	10.1117	PIPOX;MAT1A	0.105263	1.03484			GO_Biological_Process_2021	ear morphogenesis	3/23	0.12507	0.956808	0	0	2.62973	5.46691	TMIE;FGFR2;ATP6V1B1	0.130435	0.902848
GO_Biological_Process_2021	atrioventricular valve morphogenesis	2/19	0.0922902	0.57705	0	0	4.24359	10.1117	HEYL;GATA4	0.105263	1.03484			GO_Biological_Process_2021	regulation of SMAD protein signal transduction	3/23	0.12507	0.956808	0	0	2.62973	5.46691	WWTR1;RBPMS;OVOL2	0.130435	0.902848
GO_Biological_Process_2021	dopamine metabolic process	2/19	0.0922902	0.57705	0	0	4.24359	10.1117	TH;SNCA	0.105263	1.03484			GO_Biological_Process_2021	negative regulation of phosphoprotein phosphatase activity	3/23	0.12507	0.956808	0	0	2.62973	5.46691	PPP1R15A;LGALS3;MGAT5	0.130435	0.902848
GO_Biological_Process_2021	regulation of collagen biosynthetic process	2/19	0.0922902	0.57705	0	0	4.24359	10.1117	TGFB1;VIM	0.105263	1.03484			GO_Biological_Process_2021	aortic valve development	4/36	0.127805	0.956808	0	0	2.19208	4.50966	BMP2;SLIT2;SOX9;TNFRSF1A	0.111111	0.893451
Reactome_2016	Na+/Cl- dependent neurotransmitter transporters	2/19	0.0922902	0.918209	0	0	4.24359	10.1117	SLC6A19;SLC18A2	0.105263	1.03484			GO_Biological_Process_2021	dendrite morphogenesis	4/36	0.127805	0.956808	0	0	2.19208	4.50966	ARC;BTBD3;DCDC2;PTN	0.111111	0.893451
GO_Biological_Process_2021	regulation of epithelial cell differentiation	2/19	0.0922902	0.57705	0	0	4.24359	10.1117	OSR1;AJAP1	0.105263	1.03484			GO_Biological_Process_2021	regulation of sodium ion transport	4/36	0.127805	0.956808	0	0	2.19208	4.50966	NKAIN2;BPIFA1;ATP2B4;PRSS8	0.111111	0.893451
GO_Biological_Process_2021	heart trabecula morphogenesis	2/19	0.0922902	0.57705	0	0	4.24359	10.1117	TGFBR3;NRG1	0.105263	1.03484			GO_Biological_Process_2021	negative regulation of toll-like receptor signaling pathway	4/36	0.127805	0.956808	0	0	2.19208	4.50966	LY96;IRAK3;NR1D1;TLR3	0.111111	0.893451
GO_Biological_Process_2021	heparan sulfate proteoglycan biosynthetic process	2/19	0.0922902	0.57705	0	0	4.24359	10.1117	HS3ST3B1;HS6ST3	0.105263	1.03484			GO_Biological_Process_2021	platelet aggregation	4/36	0.127805	0.956808	0	0	2.19208	4.50966	CSRP1;FN1;HBB;MYL9	0.111111	0.893451
GO_Biological_Process_2021	long-term memory	2/19	0.0922902	0.57705	0	0	4.24359	10.1117	RGS14;RASGRF1	0.105263	1.03484			GO_Biological_Process_2021	diterpenoid metabolic process	6/64	0.131069	0.956808	0	0	1.81501	3.68816	RBP4;CYP4V2;ALDH1A1;SDC3;GPC2;GPC4	0.09375	0.882498
GO_Biological_Process_2021	striated muscle cell differentiation	2/19	0.0922902	0.57705	0	0	4.24359	10.1117	NRG1;BVES	0.105263	1.03484			GO_Biological_Process_2021	regulation of protein phosphorylation	19/266	0.131684	0.956808	0	0	1.35246	2.7419	WWTR1;CD40;CEBPB;ANGPT1;FN1;ARRB1;MT3;FGR;BMP2;CCND2;CCND1;CCDC88C;SOX9;SLIT2;ATF3;PROM2;ENG;FGF21;NKX3-1	0.0714286	0.880468
GO_Biological_Process_2021	neural crest cell differentiation	2/19	0.0922902	0.57705	0	0	4.24359	10.1117	NRG1;SOX11	0.105263	1.03484			GO_Biological_Process_2021	actin polymerization or depolymerization	5/50	0.131745	0.956808	0	0	1.94899	3.95037	SVIL;MICALL2;CAPG;VILL;AIF1	0.1	0.880264
GO_Biological_Process_2021	positive regulation of cellular protein catabolic process	2/19	0.0922902	0.57705	0	0	4.24359	10.1117	CTSC;DACT1	0.105263	1.03484			Reactome_2016	Chondroitin sulfate/dermatan sulfate metabolism	5/50	0.131745	0.999996	0	0	1.94899	3.95037	HEXB;DSEL;SDC3;GPC2;GPC4	0.1	0.880264
Reactome_2016	Phase 4 - resting membrane potential	2/19	0.0922902	0.918209	0	0	4.24359	10.1117	KCNK9;KCNJ2	0.105263	1.03484			Reactome_2016	Reduction of cytosolic Ca++ levels	2/12	0.134615	0.999996	0	0	3.50491	7.02852	ATP2B4;ATP2A3	0.166667	0.870906
GO_Biological_Process_2021	positive regulation of cell differentiation	11/258	0.0927352	0.57705	0	0	1.61433	3.83889	HEYL;NELL1;DAB2;BRINP1;TGFB1;ID2;ZBTB16;HOXB4;SOX11;NEUROG1;BMP6	0.0426357	1.03276			GO_Biological_Process_2021	digestive system development	2/12	0.134615	0.956808	0	0	3.50491	7.02852	KIT;FGFR2	0.166667	0.870906
GO_Biological_Process_2021	negative regulation of cell-substrate adhesion	3/40	0.0932704	0.57705	0	0	2.92706	6.94372	KANK1;SPRY4;AJAP1	0.075	1.03026			GO_Biological_Process_2021	regulation of nucleobase-containing compound metabolic process	2/12	0.134615	0.956808	0	0	3.50491	7.02852	IGF2BP1;IGF2BP2	0.166667	0.870906
KEGG_2021_Human	Nicotine addiction	3/40	0.0932704	0.810517	0	0	2.92706	6.94372	GABRB3;GRIA1;GABRG2	0.075	1.03026			GO_Biological_Process_2021	epithelial cell-cell adhesion	2/12	0.134615	0.956808	0	0	3.50491	7.02852	JUP;KIT	0.166667	0.870906
GO_Biological_Process_2021	stem cell differentiation	3/40	0.0932704	0.57705	0	0	2.92706	6.94372	GPM6A;OSR1;HOXB4	0.075	1.03026			GO_Biological_Process_2021	ganglion development	2/12	0.134615	0.956808	0	0	3.50491	7.02852	NRP2;UNC5C	0.166667	0.870906
GO_Biological_Process_2021	regulation of nitric oxide biosynthetic process	3/40	0.0932704	0.57705	0	0	2.92706	6.94372	DDAH1;NOS1AP;ASS1	0.075	1.03026			GO_Biological_Process_2021	regulation of vascular associated smooth muscle cell migration	2/12	0.134615	0.956808	0	0	3.50491	7.02852	DOCK5;DOCK4	0.166667	0.870906
GO_Biological_Process_2021	regulation of cation channel activity	5/89	0.0935858	0.57705	0	0	2.15163	5.09695	JPH4;GRIA1;NLGN1;SHISA9;FGF13	0.0561798	1.02879			GO_Biological_Process_2021	regulation of ventricular cardiac muscle cell action potential	2/12	0.134615	0.956808	0	0	3.50491	7.02852	JUP;TRPM4	0.166667	0.870906
KEGG_2021_Human	GnRH secretion	4/64	0.0949101	0.810517	0	0	2.40832	5.67117	PRKCG;PRKCB;KCNN2;KCNJ3	0.0625	1.02269			GO_Biological_Process_2021	glycine metabolic process	2/12	0.134615	0.956808	0	0	3.50491	7.02852	SHMT1;AMT	0.166667	0.870906
GO_Biological_Process_2021	diterpenoid metabolic process	4/64	0.0949101	0.57705	0	0	2.40832	5.67117	TTR;GPC5;BCO1;PLB1	0.0625	1.02269			GO_Biological_Process_2021	sphingoid metabolic process	2/12	0.134615	0.956808	0	0	3.50491	7.02852	SPTLC3;DEGS2	0.166667	0.870906
KEGG_2021_Human	Focal adhesion	9/201	0.0964051	0.810517	0	0	1.69763	3.9711	PRKCG;COL2A1;PRKCB;LAMC3;COL6A2;RASGRF1;COL6A1;FLNA;PARVB	0.0447761	1.0159			GO_Biological_Process_2021	melanocyte differentiation	2/12	0.134615	0.956808	0	0	3.50491	7.02852	LRMDA;KIT	0.166667	0.870906
GO_Biological_Process_2021	negative regulation of cell migration	7/144	0.0964313	0.57705	0	0	1.84879	4.32419	PTPRT;NGFR;KANK1;TMEFF2;ACVR1C;DPYSL3;LDLRAD4	0.0486111	1.01578			GO_Biological_Process_2021	toll-like receptor 3 signaling pathway	2/12	0.134615	0.956808	0	0	3.50491	7.02852	SCARA3;TLR3	0.166667	0.870906
GO_Biological_Process_2021	negative regulation of cell-cell adhesion	3/41	0.0987122	0.57705	0	0	2.84988	6.59904	TGFB1;ASS1;BMP6	0.0731707	1.00563			GO_Biological_Process_2021	regulation of actin filament depolymerization	2/12	0.134615	0.956808	0	0	3.50491	7.02852	SEMA5A;PLEKHH2	0.166667	0.870906
GO_Biological_Process_2021	mitotic G1 DNA damage checkpoint signaling	4/65	0.0990928	0.57705	0	0	2.36872	5.47576	CDKN1A;PLAGL1;PLK2;GTSE1	0.0615385	1.00396			GO_Biological_Process_2021	axonal fasciculation	2/12	0.134615	0.956808	0	0	3.50491	7.02852	SEMA5A;CNTN4	0.166667	0.870906
GO_Biological_Process_2021	positive regulation of transport	5/91	0.100511	0.57705	0	0	2.10138	4.82788	TUB;DAB2;CALY;GAS6;SNCA	0.0549451	0.997785			GO_Biological_Process_2021	regulation of hemopoiesis	2/12	0.134615	0.956808	0	0	3.50491	7.02852	LGALS3;PTN	0.166667	0.870906
GO_Biological_Process_2021	granulocyte differentiation	2/20	0.100775	0.57705	0	0	4.00763	9.19698	CEBPA;CDKN1A	0.1	0.996649			GO_Biological_Process_2021	cardiocyte differentiation	2/12	0.134615	0.956808	0	0	3.50491	7.02852	BMP2;GATA6	0.166667	0.870906
Reactome_2016	Metabolism of nitric oxide	2/20	0.100775	0.940667	0	0	4.00763	9.19698	DDAH1;PRKG2	0.1	0.996649			Reactome_2016	Physiological factors	2/12	0.134615	0.999996	0	0	3.50491	7.02852	NPPC;WWTR1	0.166667	0.870906
GO_Biological_Process_2021	energy reserve metabolic process	2/20	0.100775	0.57705	0	0	4.00763	9.19698	PID1;GFPT2	0.1	0.996649			GO_Biological_Process_2021	urogenital system development	2/12	0.134615	0.956808	0	0	3.50491	7.02852	SOX9;ALOX15B	0.166667	0.870906
GO_Biological_Process_2021	embryonic digestive tract development	2/20	0.100775	0.57705	0	0	4.00763	9.19698	ID2;SOX11	0.1	0.996649			GO_Biological_Process_2021	nonribosomal peptide biosynthetic process	2/12	0.134615	0.956808	0	0	3.50491	7.02852	BDH2;CHAC2	0.166667	0.870906
GO_Biological_Process_2021	cardiac ventricle development	2/20	0.100775	0.57705	0	0	4.00763	9.19698	HEYL;GATA4	0.1	0.996649			GO_Biological_Process_2021	negative regulation of complement activation	2/12	0.134615	0.956808	0	0	3.50491	7.02852	SERPING1;C4BPB	0.166667	0.870906
GO_Biological_Process_2021	adrenergic receptor signaling pathway	2/20	0.100775	0.57705	0	0	4.00763	9.19698	GPR101;ADRA2A	0.1	0.996649			GO_Biological_Process_2021	negative regulation of cellular response to vascular endothelial growth factor stimulus	2/12	0.134615	0.956808	0	0	3.50491	7.02852	SEMA6A;ATP2B4	0.166667	0.870906
Reactome_2016	eNOS activation and regulation	2/20	0.100775	0.940667	0	0	4.00763	9.19698	DDAH1;PRKG2	0.1	0.996649			Reactome_2016	Sema4D induced cell migration and growth-cone collapse	3/24	0.137506	0.999996	0	0	2.50437	4.96889	MYH14;MYL9;RND1	0.125	0.861677
GO_Biological_Process_2021	cardiac epithelial to mesenchymal transition	2/20	0.100775	0.57705	0	0	4.00763	9.19698	TGFBR3;HEYL	0.1	0.996649			GO_Biological_Process_2021	porphyrin-containing compound biosynthetic process	3/24	0.137506	0.956808	0	0	2.50437	4.96889	ALAS2;RSAD1;TSPO	0.125	0.861677
GO_Biological_Process_2021	eye morphogenesis	2/20	0.100775	0.57705	0	0	4.00763	9.19698	COL5A1;FBN1	0.1	0.996649			GO_Biological_Process_2021	negative regulation of neuron differentiation	3/24	0.137506	0.956808	0	0	2.50437	4.96889	DTX1;CNTN4;SOX9	0.125	0.861677
GO_Biological_Process_2021	hepaticobiliary system development	2/20	0.100775	0.57705	0	0	4.00763	9.19698	TGFBR3;CEBPA	0.1	0.996649			GO_Biological_Process_2021	extracellular matrix assembly	3/24	0.137506	0.956808	0	0	2.50437	4.96889	NTNG1;EFEMP2;LTBP3	0.125	0.861677
GO_Biological_Process_2021	axon guidance	9/203	0.100893	0.57705	0	0	1.67996	3.85331	DOK1;EPHA7;CXCL12;DAB1;DSCAM;SEMA3D;EPHB1;EPHA3;PLXNA4	0.044335	0.996139			GO_Biological_Process_2021	regulation of cellular response to transforming growth factor beta stimulus	3/24	0.137506	0.956808	0	0	2.50437	4.96889	LATS2;LTBP4;ENG	0.125	0.861677
GO_Biological_Process_2021	heterophilic cell-cell adhesion via plasma membrane cell adhesion molecules	3/42	0.104279	0.57705	0	0	2.77667	6.27717	NLGN1;TENM2;GRID2	0.0714286	0.981804			GO_Biological_Process_2021	positive regulation of phospholipase activity	3/24	0.137506	0.956808	0	0	2.50437	4.96889	KIT;FGFR2;FGFR1	0.125	0.861677
GO_Biological_Process_2021	positive regulation of protein tyrosine kinase activity	3/42	0.104279	0.57705	0	0	2.77667	6.27717	GAS6;SRCIN1;ADRA2A	0.0714286	0.981804			Reactome_2016	Synthesis of bile acids and bile salts via 7alpha-hydroxycholesterol	3/24	0.137506	0.999996	0	0	2.50437	4.96889	CYP27A1;HSD3B7;ACOX2	0.125	0.861677
Reactome_2016	Non-integrin membrane-ECM interactions	3/42	0.104279	0.940667	0	0	2.77667	6.27717	TTR;TGFB1;LAMC3	0.0714286	0.981804			GO_Biological_Process_2021	lysosome localization	4/37	0.137543	0.956808	0	0	2.12555	4.21669	RAB34;KIT;TFEB;SYTL4	0.108108	0.861561
KEGG_2021_Human	Salivary secretion	5/93	0.107686	0.873026	0	0	2.0534	4.57609	PRKCG;GUCY1A2;PRKCB;PRKG2;PRKG1	0.0537634	0.967841			GO_Biological_Process_2021	regulation of smoothened signaling pathway	5/51	0.139989	0.956808	0	0	1.90652	3.74858	EVC;RAB34;DCDC2;FGFR2;ACTRT1	0.0980392	0.853906
GO_Biological_Process_2021	regulation of epithelial cell proliferation	5/93	0.107686	0.57705	0	0	2.0534	4.57609	TGFBR3;CDKN2B;TGFB1;OSR1;BMP6	0.0537634	0.967841			GO_Biological_Process_2021	regulation of epithelial cell migration	5/51	0.139989	0.956808	0	0	1.90652	3.74858	DOCK5;MARVELD3;TACSTD2;SOX9;PTN	0.0980392	0.853906
GO_Biological_Process_2021	visual perception	5/93	0.107686	0.57705	0	0	2.0534	4.57609	RD3;COL2A1;TH;CRYBG3;CRYBB2	0.0537634	0.967841			Reactome_2016	Nuclear Receptor transcription pathway	5/51	0.139989	0.999996	0	0	1.90652	3.74858	NR5A2;NR6A1;ESRRG;NR1D1;NR3C2	0.0980392	0.853906
GO_Biological_Process_2021	positive regulation of catabolic process	4/67	0.107709	0.57705	0	0	2.29328	5.11016	SCT;PLK2;DTL;DACT1	0.0597015	0.967746			GO_Biological_Process_2021	regulation of axonogenesis	5/51	0.139989	0.956808	0	0	1.90652	3.74858	CHODL;LINGO1;MAG;EFNB3;SLIT2	0.0980392	0.853906
GO_Biological_Process_2021	endocardial cushion development	2/21	0.109465	0.57705	0	0	3.7965	8.39845	HEYL;GATA4	0.0952381	0.960726			GO_Biological_Process_2021	positive regulation of phosphorylation	18/253	0.142852	0.956808	0	0	1.3463	2.61982	CD40;ANGPT1;FZD7;ARRB1;MT3;BMP2;CCND2;CCND1;KIT;SOX9;ROS1;EPHB4;FGFR2;PROM2;ENG;FGF21;FGFR1;NKX3-1	0.0711462	0.845113
GO_Biological_Process_2021	regulation of transcription by RNA polymerase III	2/21	0.109465	0.57705	0	0	3.7965	8.39845	CEBPA;NAB2	0.0952381	0.960726			GO_Biological_Process_2021	cellular divalent inorganic cation homeostasis	9/111	0.146317	0.956808	0	0	1.54881	2.97678	CASR;CD40;SLC11A1;ATP2A3;RGN;ATP2B4;STC1;ATP2C2;MT3	0.0810811	0.834705
GO_Biological_Process_2021	regulation of lipid catabolic process	2/21	0.109465	0.57705	0	0	3.7965	8.39845	SCT;ADRA2A	0.0952381	0.960726			KEGG_2021_Human	Primary immunodeficiency	4/38	0.147568	0.999994	0	0	2.06292	3.94732	ZAP70;CD40;AIRE;TNFRSF13C	0.105263	0.831007
Reactome_2016	TP53 regulates transcription of additional cell cycle genes whose exact role in the p53 pathway remain uncertain	2/21	0.109465	0.940667	0	0	3.7965	8.39845	PLK2;PLAGL1	0.0952381	0.960726			Reactome_2016	MAP2K and MAPK activation	4/38	0.147568	0.999996	0	0	2.06292	3.94732	APBB1IP;FN1;ARRB1;IL17RD	0.105263	0.831007
GO_Biological_Process_2021	negative regulation of ion transmembrane transporter activity	2/21	0.109465	0.57705	0	0	3.7965	8.39845	OSR1;ADRA2A	0.0952381	0.960726			GO_Biological_Process_2021	cartilage development	5/52	0.148452	0.956808	0	0	1.86585	3.55911	BMP2;SNORC;NFIB;SOX9;SOX6	0.0961538	0.828415
GO_Biological_Process_2021	negative regulation of cell communication	2/21	0.109465	0.57705	0	0	3.7965	8.39845	GLRA1;KIF26A	0.0952381	0.960726			GO_Biological_Process_2021	ameboidal-type cell migration	5/52	0.148452	0.956808	0	0	1.86585	3.55911	SEMA5A;SEMA6A;SEMA3C;PKN3;SEMA6D	0.0961538	0.828415
GO_Biological_Process_2021	myotube differentiation	2/21	0.109465	0.57705	0	0	3.7965	8.39845	ADAMTS5;ADGRB3	0.0952381	0.960726			GO_Biological_Process_2021	regulation of intrinsic apoptotic signaling pathway	5/52	0.148452	0.956808	0	0	1.86585	3.55911	DDIT3;RTKN2;PMAIP1;NUPR1;NKX3-1	0.0961538	0.828415
GO_Biological_Process_2021	heparan sulfate proteoglycan metabolic process	2/21	0.109465	0.57705	0	0	3.7965	8.39845	HS3ST3B1;HS6ST3	0.0952381	0.960726			Reactome_2016	TRP channels	3/25	0.150342	0.999996	0	0	2.39041	4.52946	TRPC4;TRPM8;TRPM4	0.12	0.822921
GO_Biological_Process_2021	autonomic nervous system development	2/21	0.109465	0.57705	0	0	3.7965	8.39845	KIF26A;SOX11	0.0952381	0.960726			GO_Biological_Process_2021	regulation of AMPA receptor activity	3/25	0.150342	0.956808	0	0	2.39041	4.52946	NLGN3;PRRT1;ARC	0.12	0.822921
GO_Biological_Process_2021	positive regulation of axonogenesis	3/43	0.109966	0.57705	0	0	2.70711	5.97617	NGFR;SLITRK1;PLXNA4	0.0697674	0.958741			GO_Biological_Process_2021	cAMP-mediated signaling	3/25	0.150342	0.956808	0	0	2.39041	4.52946	GAL;PDE3A;SOX9	0.12	0.822921
GO_Biological_Process_2021	cellular glucose homeostasis	3/43	0.109966	0.57705	0	0	2.70711	5.97617	NGFR;KCNB1;GAS6	0.0697674	0.958741			GO_Biological_Process_2021	response to dsRNA	3/25	0.150342	0.956808	0	0	2.39041	4.52946	PMAIP1;IRAK3;TLR3	0.12	0.822921
Reactome_2016	Glycosaminoglycan metabolism	6/121	0.110451	0.940667	0	0	1.88645	4.1562	HS3ST3B1;CEMIP;GPC5;CHSY3;HS6ST3;HS3ST2	0.0495868	0.956831			GO_Biological_Process_2021	peripheral nervous system development	3/25	0.150342	0.956808	0	0	2.39041	4.52946	UGT8;EGR2;NEUROG3	0.12	0.822921
GO_Biological_Process_2021	negative regulation of signal transduction	11/267	0.110629	0.57705	0	0	1.55685	3.42752	PTPRT;KANK1;PID1;RGS14;PRKCB;KIF26A;SPRY4;GATA4;TRABD2B;DACT1;SNCA	0.0411985	0.956132			GO_Biological_Process_2021	regulation of cytoskeleton organization	9/112	0.151999	0.956808	0	0	1.53369	2.88929	CLIC4;CAPN6;FSCN1;ARHGEF19;GRHL3;CORO2B;RND3;ARHGEF5;RND1	0.0803571	0.81816
GO_Biological_Process_2021	hemopoiesis	5/94	0.111365	0.57705	0	0	2.03023	4.45624	TGFBR3;CEBPA;TGFB1;FST;ZBTB16	0.0531915	0.953252			Reactome_2016	Integrin cell surface interactions	6/67	0.153087	0.999996	0	0	1.72547	3.23828	COL18A1;COL13A1;CDH1;ITGA11;FN1;ITGA7	0.0895522	0.81506
GO_Biological_Process_2021	positive regulation of protein localization to nucleus	4/68	0.11214	0.57705	0	0	2.25733	4.93905	NGFR;TGFB1;FLNA;GTSE1	0.0588235	0.950238			GO_Biological_Process_2021	macrophage activation involved in immune response	2/13	0.153641	0.956808	0	0	3.18612	5.96802	SYK;IFI35	0.153846	0.813492
GO_Biological_Process_2021	negative regulation of transforming growth factor beta receptor signaling pathway	4/68	0.11214	0.57705	0	0	2.25733	4.93905	TGFB1;PEG10;LDLRAD4;FBN1	0.0588235	0.950238			GO_Biological_Process_2021	positive regulation of calcium ion import	2/13	0.153641	0.956808	0	0	3.18612	5.96802	LGALS3;STC1	0.153846	0.813492
KEGG_2021_Human	Vasopressin-regulated water reabsorption	3/44	0.11577	0.906202	0	0	2.64095	5.69427	CREB3L3;AVP;DYNC1I1	0.0681818	0.936403			GO_Biological_Process_2021	positive regulation of neuron migration	2/13	0.153641	0.956808	0	0	3.18612	5.96802	SEMA6A;ARHGEF2	0.153846	0.813492
GO_Biological_Process_2021	positive regulation of biosynthetic process	3/44	0.11577	0.57705	0	0	2.64095	5.69427	TGFB1;ADGRB1;VIM	0.0681818	0.936403			GO_Biological_Process_2021	positive regulation of protein localization to cell surface	2/13	0.153641	0.956808	0	0	3.18612	5.96802	SNX33;TMEM35A	0.153846	0.813492
GO_Biological_Process_2021	positive regulation of osteoblast differentiation	3/44	0.11577	0.57705	0	0	2.64095	5.69427	NELL1;SOX11;BMP6	0.0681818	0.936403			GO_Biological_Process_2021	plasma membrane tubulation	2/13	0.153641	0.956808	0	0	3.18612	5.96802	PACSIN3;SNX33	0.153846	0.813492
GO_Biological_Process_2021	negative regulation of biomineral tissue development	2/22	0.118343	0.57705	0	0	3.60649	7.69686	TGFB1;GAS6	0.0909091	0.926857			GO_Biological_Process_2021	muscle tissue development	2/13	0.153641	0.956808	0	0	3.18612	5.96802	CSRP1;ENG	0.153846	0.813492
GO_Biological_Process_2021	negative regulation of cyclin-dependent protein kinase activity	2/22	0.118343	0.57705	0	0	3.60649	7.69686	CEBPA;CDKN1A	0.0909091	0.926857			GO_Biological_Process_2021	entry into host	2/13	0.153641	0.956808	0	0	3.18612	5.96802	CDH1;CXCR4	0.153846	0.813492
GO_Biological_Process_2021	regulation of cardiac muscle cell membrane repolarization	2/22	0.118343	0.57705	0	0	3.60649	7.69686	NOS1AP;FLNA	0.0909091	0.926857			GO_Biological_Process_2021	glycogen biosynthetic process	2/13	0.153641	0.956808	0	0	3.18612	5.96802	PPP1R3C;NR1D1	0.153846	0.813492
GO_Biological_Process_2021	regulation of voltage-gated calcium channel activity	2/22	0.118343	0.57705	0	0	3.60649	7.69686	NOS1AP;PDE4B	0.0909091	0.926857			GO_Biological_Process_2021	glucan biosynthetic process	2/13	0.153641	0.956808	0	0	3.18612	5.96802	PPP1R3C;NR1D1	0.153846	0.813492
GO_Biological_Process_2021	membrane protein intracellular domain proteolysis	2/22	0.118343	0.57705	0	0	3.60649	7.69686	NGFR;TGFB1	0.0909091	0.926857			Reactome_2016	NICD traffics to nucleus	2/13	0.153641	0.999996	0	0	3.18612	5.96802	NOTCH2;NOTCH3	0.153846	0.813492
GO_Biological_Process_2021	negative regulation of phosphate metabolic process	2/22	0.118343	0.57705	0	0	3.60649	7.69686	CDKN1A;CDKN2B	0.0909091	0.926857			Reactome_2016	Notch-HLH transcription pathway	2/13	0.153641	0.999996	0	0	3.18612	5.96802	NOTCH2;NOTCH3	0.153846	0.813492
GO_Biological_Process_2021	regulation of insulin receptor signaling pathway	3/45	0.121687	0.57705	0	0	2.57793	5.42992	KANK1;PID1;PRKCB	0.0666667	0.914757			KEGG_2021_Human	Prostate cancer	8/97	0.153778	0.999994	0	0	1.57743	2.95334	TCF7L2;CCND1;CREB3L4;TMPRSS2;FGFR2;FGFR1;NKX3-1;CREB5	0.0824742	0.813106
GO_Biological_Process_2021	action potential	3/45	0.121687	0.57705	0	0	2.57793	5.42992	KCND2;KCNB1;KCNJ2	0.0666667	0.914757			GO_Biological_Process_2021	calcium ion homeostasis	8/97	0.153778	0.956808	0	0	1.57743	2.95334	CASR;CD40;ATP2A3;RGN;ATP2B4;STC1;ATP2C2;ATP6V1B1	0.0824742	0.813106
GO_Biological_Process_2021	regulation of MAP kinase activity	5/97	0.122759	0.57705	0	0	1.96372	4.11897	TGFB1;RGS14;DIRAS2;SPRY4;ADRA2A	0.0515464	0.910948			GO_Biological_Process_2021	regulation of cell population proliferation	48/764	0.155606	0.956808	0	0	1.18133	2.19778	TRIM71;YAP1;COL18A1;PTPRU;CTF1;CDCA7L;RTKN2;UMOD;LAMC2;IFI35;PTPRK;PTN;AIF1;DPP4;NUAK1;CCND2;FRZB;TSPO;SH3BP4;ZNF503;SOX9;JUNB;S100A11;NKX3-1;TRPM4;FGF21;WWTR1;TCF7L2;EGLN3;JUP;FN1;IFNLR1;ALOX15B;MEIS2;BMP2;MEIS1;RGCC;TFAP4;SST;FES;KIT;ARHGEF2;NUPR1;SLC25A33;FGFR2;ENG;HBEGF;FGFR1	0.0628272	0.807975
GO_Biological_Process_2021	glycosaminoglycan biosynthetic process	5/97	0.122759	0.57705	0	0	1.96372	4.11897	HS3ST3B1;CEMIP;CHSY3;GPC5;HS3ST2	0.0515464	0.910948			GO_Biological_Process_2021	positive regulation of NIK/NF-kappaB signaling	5/53	0.157125	0.956808	0	0	1.82689	3.38104	TCIM;RTKN2;IFI35;TLR3;NR3C2	0.0943396	0.803754
GO_Biological_Process_2021	positive regulation of protein kinase activity	7/154	0.124985	0.57705	0	0	1.72213	3.58128	CDKN1A;NAB2;GAS6;SRCIN1;ADRA2A;SLC8A2;SNCA	0.0454545	0.903141			GO_Biological_Process_2021	positive regulation of chemokine production	5/53	0.157125	0.956808	0	0	1.82689	3.38104	SYK;AIRE;AIF1;ALOX15B;TLR3	0.0943396	0.803754
KEGG_2021_Human	Inflammatory mediator regulation of TRP channels	5/98	0.126673	0.928438	0	0	1.94251	4.0135	PRKCG;PTGER4;ASIC4;PRKCB;ASIC2	0.0510204	0.897317			GO_Biological_Process_2021	positive regulation of B cell activation	5/53	0.157125	0.956808	0	0	1.82689	3.38104	CD40;MMP14;SYK;CD38;TNFRSF13C	0.0943396	0.803754
GO_Biological_Process_2021	ERK1 and ERK2 cascade	2/23	0.127393	0.57705	0	0	3.43458	7.07686	PTGER4;AVP	0.0869565	0.894853			GO_Biological_Process_2021	heart morphogenesis	5/53	0.157125	0.956808	0	0	1.82689	3.38104	BMP2;ACTC1;SOX9;EPHB4;ENG	0.0943396	0.803754
GO_Biological_Process_2021	negative regulation of G protein-coupled receptor signaling pathway	2/23	0.127393	0.57705	0	0	3.43458	7.07686	RGS14;SNCA	0.0869565	0.894853			GO_Biological_Process_2021	cardiac muscle tissue development	5/53	0.157125	0.956808	0	0	1.82689	3.38104	NOTCH2;RBP4;BMP2;ACTC1;GATA6	0.0943396	0.803754
GO_Biological_Process_2021	hyaluronan metabolic process	2/23	0.127393	0.57705	0	0	3.43458	7.07686	CEMIP;TGFB1	0.0869565	0.894853			GO_Biological_Process_2021	positive regulation of metabolic process	9/113	0.157788	0.956808	0	0	1.51886	2.80459	CEBPB;SYK;PRDM16;FFAR4;CXCR4;ESRRG;PTH2R;TRPM8;FGF21	0.079646	0.801927
GO_Biological_Process_2021	response to nutrient levels	2/23	0.127393	0.57705	0	0	3.43458	7.07686	KCNB1;SCT	0.0869565	0.894853			Reactome_2016	Formation of Fibrin Clot (Clotting Cascade)	4/39	0.157866	0.999996	0	0	2.00387	3.69917	PROCR;F8;SERPING1;F5	0.102564	0.801712
GO_Biological_Process_2021	ear morphogenesis	2/23	0.127393	0.57705	0	0	3.43458	7.07686	OSR1;NEUROG1	0.0869565	0.894853			GO_Biological_Process_2021	regulation of dendrite development	4/39	0.157866	0.956808	0	0	2.00387	3.69917	BCL11A;PTN;VLDLR;LZTS1	0.102564	0.801712
GO_Biological_Process_2021	cilium-dependent cell motility	2/23	0.127393	0.57705	0	0	3.43458	7.07686	TEKT3;DRC1	0.0869565	0.894853			GO_Biological_Process_2021	endothelial cell migration	4/39	0.157866	0.956808	0	0	2.00387	3.69917	DPP4;EGR3;PXN;FSTL1	0.102564	0.801712
GO_Biological_Process_2021	regulation of cysteine-type endopeptidase activity	2/23	0.127393	0.57705	0	0	3.43458	7.07686	NGFR;EPHA7	0.0869565	0.894853			GO_Biological_Process_2021	regulation of viral entry into host cell	4/39	0.157866	0.956808	0	0	2.00387	3.69917	IFITM3;TMPRSS2;HS3ST5;TRIM38	0.102564	0.801712
GO_Biological_Process_2021	positive regulation of interleukin-17 production	2/23	0.127393	0.57705	0	0	3.43458	7.07686	TGFB1;CARD9	0.0869565	0.894853			GO_Biological_Process_2021	regulation of tyrosine phosphorylation of STAT protein	6/68	0.16077	0.956808	0	0	1.69755	3.10276	SOCS3;CD40;CTF1;KIT;STAP2;TNFRSF1A	0.0882353	0.793795
GO_Biological_Process_2021	negative regulation of multicellular organismal process	9/214	0.127661	0.57705	0	0	1.58891	3.27056	PTGER4;ADAMTS5;TGFB1;ACVR1C;PLCL1;LDLRAD4;GAS6;ZNF423;NEUROG1	0.0420561	0.893941			GO_Biological_Process_2021	regulation of Notch signaling pathway	7/83	0.161309	0.956808	0	0	1.61596	2.94821	YAP1;NOTCH3;MMP14;TSPAN14;TCIM;DTX1;ARRB1	0.0843373	0.792342
GO_Biological_Process_2021	regulation of synaptic transmission, glutamatergic	3/46	0.127712	0.57705	0	0	2.51785	5.18169	NLGN1;TSHZ3;GRIK3	0.0652174	0.89377			GO_Biological_Process_2021	regulation of osteoblast differentiation	7/83	0.161309	0.956808	0	0	1.61596	2.94821	YAP1;WWTR1;BMP2;FFAR4;SOX9;FGFR2;TRPM4	0.0843373	0.792342
GO_Biological_Process_2021	regulation of cellular protein localization	3/46	0.127712	0.57705	0	0	2.51785	5.18169	CEP72;GPC5;KCNAB2	0.0652174	0.89377			GO_Biological_Process_2021	epidermis development	7/83	0.161309	0.956808	0	0	1.61596	2.94821	GATA6;LAMC2;GRHL3;OVOL1;GRHL2;FGFR2;OVOL2	0.0843373	0.792342
Reactome_2016	G alpha (z) signalling events	3/46	0.127712	0.940667	0	0	2.51785	5.18169	PRKCG;PRKCB;ADRA2A	0.0652174	0.89377			GO_Biological_Process_2021	positive regulation of cell differentiation	18/258	0.161433	0.956808	0	0	1.3179	2.4034	YAP1;WWTR1;CEBPB;TACSTD2;PTN;ALOX15B;GPRC5B;ZFP36;BMP2;RGCC;FRZB;FES;FFAR4;SOX9;ARHGEF2;SOX6;TRPM4;FGFR1	0.0697674	0.792007
GO_Biological_Process_2021	regulation of skeletal muscle tissue development	1/5	0.12814	0.57705	0	0	9.00694	18.506	TGFB1	0.2	0.892315			Reactome_2016	Diseases associated with glycosaminoglycan metabolism	3/26	0.16354	0.999996	0	0	2.28636	4.13991	SDC3;GPC2;GPC4	0.115385	0.786376
GO_Biological_Process_2021	regulation of guanylate cyclase activity	1/5	0.12814	0.57705	0	0	9.00694	18.506	RD3	0.2	0.892315			GO_Biological_Process_2021	regulation of myelination	3/26	0.16354	0.956808	0	0	2.28636	4.13991	EGR2;PTN;NCMAP	0.115385	0.786376
GO_Biological_Process_2021	regulation of protein kinase C activity	1/5	0.12814	0.57705	0	0	9.00694	18.506	CEMIP	0.2	0.892315			Reactome_2016	Calmodulin induced events	3/26	0.16354	0.999996	0	0	2.28636	4.13991	PDE1C;PRKAR2B;ADCY4	0.115385	0.786376
GO_Biological_Process_2021	regulation of protein import	1/5	0.12814	0.57705	0	0	9.00694	18.506	TGFB1	0.2	0.892315			Reactome_2016	CaM pathway	3/26	0.16354	0.999996	0	0	2.28636	4.13991	PDE1C;PRKAR2B;ADCY4	0.115385	0.786376
GO_Biological_Process_2021	endocardial cell differentiation	1/5	0.12814	0.57705	0	0	9.00694	18.506	NRG1	0.2	0.892315			Reactome_2016	A tetrasaccharide linker sequence is required for GAG synthesis	3/26	0.16354	0.999996	0	0	2.28636	4.13991	SDC3;GPC2;GPC4	0.115385	0.786376
GO_Biological_Process_2021	regulation of natural killer cell differentiation	1/5	0.12814	0.57705	0	0	9.00694	18.506	GAS6	0.2	0.892315			KEGG_2021_Human	Leukocyte transendothelial migration	9/114	0.163682	0.999994	0	0	1.50432	2.72256	CLDN6;CLDN22;CLDN10;CLDN8;MMP2;PXN;CXCR4;ESAM;MYL9	0.0789474	0.786
GO_Biological_Process_2021	regulation of miRNA catabolic process	1/5	0.12814	0.57705	0	0	9.00694	18.506	LIN28B	0.2	0.892315			GO_Biological_Process_2021	cellular response to transforming growth factor beta stimulus	9/114	0.163682	0.956808	0	0	1.50432	2.72256	COL3A1;PXN;WFIKKN2;PDE3A;SOX9;PTPRK;SOX6;OVOL2;ENG	0.0789474	0.786
GO_Biological_Process_2021	chemokine (C-X-C motif) ligand 12 signaling pathway	1/5	0.12814	0.57705	0	0	9.00694	18.506	CXCL12	0.2	0.892315			Reactome_2016	Assembly of collagen fibrils and other multimeric structures	5/54	0.166	0.999996	0	0	1.78951	3.21353	COL18A1;COL3A1;COL5A3;COL4A5;LAMC2	0.0925926	0.779891
GO_Biological_Process_2021	cerebellar granule cell differentiation	1/5	0.12814	0.57705	0	0	9.00694	18.506	GRID2	0.2	0.892315			GO_Biological_Process_2021	glycosaminoglycan metabolic process	5/54	0.166	0.956808	0	0	1.78951	3.21353	SDC3;GPC2;HS3ST5;GPC4;HS3ST1	0.0925926	0.779891
GO_Biological_Process_2021	regulation of integrin biosynthetic process	1/5	0.12814	0.57705	0	0	9.00694	18.506	TMEFF2	0.2	0.892315			KEGG_2021_Human	Glycine, serine and threonine metabolism	4/40	0.168419	0.999994	0	0	1.94811	3.47016	ALAS2;SHMT1;AMT;GNMT	0.1	0.773608
GO_Biological_Process_2021	cellular response to vitamin	1/5	0.12814	0.57705	0	0	9.00694	18.506	GAS6	0.2	0.892315			GO_Biological_Process_2021	digestive tract development	4/40	0.168419	0.956808	0	0	1.94811	3.47016	CDX2;KIT;GATA6;FGFR2	0.1	0.773608
GO_Biological_Process_2021	regulation of heart growth	1/5	0.12814	0.57705	0	0	9.00694	18.506	DUSP9	0.2	0.892315			GO_Biological_Process_2021	positive regulation of intrinsic apoptotic signaling pathway	4/40	0.168419	0.956808	0	0	1.94811	3.47016	DDIT3;PMAIP1;NUPR1;NKX3-1	0.1	0.773608
GO_Biological_Process_2021	fructose catabolic process	1/5	0.12814	0.57705	0	0	9.00694	18.506	ALDOB	0.2	0.892315			GO_Biological_Process_2021	cell chemotaxis	6/69	0.168615	0.956808	0	0	1.67052	2.97376	SEMA5A;DOCK4;EGR3;KIT;CXCR4;HBEGF	0.0869565	0.773104
GO_Biological_Process_2021	cellular response to nutrient	1/5	0.12814	0.57705	0	0	9.00694	18.506	CDKN2B	0.2	0.892315			GO_Biological_Process_2021	calcium ion transport	9/115	0.169679	0.956808	0	0	1.49005	2.64312	CATSPER1;CASR;GRIN3A;TRPC4;ATP2A3;ATP2B4;TRPM8;ATP2C2;TRPM4	0.0782609	0.770373
GO_Biological_Process_2021	cardiac muscle cell proliferation	1/5	0.12814	0.57705	0	0	9.00694	18.506	TGFBR3	0.2	0.892315			Reactome_2016	Cell-Cell communication	10/131	0.17148	0.999996	0	0	1.45056	2.55776	CLDN6;CLDN22;CLDN10;JUP;CDH1;CLDN8;PXN;CDH12;PARD6G;LAMC2	0.0763359	0.765786
GO_Biological_Process_2021	cardiac muscle cell myoblast differentiation	1/5	0.12814	0.57705	0	0	9.00694	18.506	NRG1	0.2	0.892315			GO_Biological_Process_2021	cell-matrix adhesion	8/100	0.17303	0.956808	0	0	1.52575	2.67661	COL3A1;COL13A1;ITGA11;FN1;ITGBL1;ITGA7;VWA2;PTPRK	0.08	0.761879
GO_Biological_Process_2021	cardiac endothelial cell differentiation	1/5	0.12814	0.57705	0	0	9.00694	18.506	NRG1	0.2	0.892315			GO_Biological_Process_2021	regulation of cell projection organization	2/14	0.17314	0.956808	0	0	2.92045	5.12146	NTNG1;PROM2	0.142857	0.761601
GO_Biological_Process_2021	camera-type eye photoreceptor cell differentiation	1/5	0.12814	0.57705	0	0	9.00694	18.506	DSCAM	0.2	0.892315			GO_Biological_Process_2021	cellular response to low-density lipoprotein particle stimulus	2/14	0.17314	0.956808	0	0	2.92045	5.12146	SYK;CD9	0.142857	0.761601
GO_Biological_Process_2021	regulation of cardioblast differentiation	1/5	0.12814	0.57705	0	0	9.00694	18.506	GATA4	0.2	0.892315			GO_Biological_Process_2021	bone morphogenesis	2/14	0.17314	0.956808	0	0	2.92045	5.12146	FGFR2;IFITM5	0.142857	0.761601
GO_Biological_Process_2021	regulation of adherens junction organization	1/5	0.12814	0.57705	0	0	9.00694	18.506	BMP6	0.2	0.892315			Reactome_2016	Receptor-ligand binding initiates the second proteolytic cleavage of Notch receptor	2/14	0.17314	0.999996	0	0	2.92045	5.12146	NOTCH2;NOTCH3	0.142857	0.761601
GO_Biological_Process_2021	receptor-mediated virion attachment to host cell	1/5	0.12814	0.57705	0	0	9.00694	18.506	GAS6	0.2	0.892315			GO_Biological_Process_2021	renal absorption	2/14	0.17314	0.956808	0	0	2.92045	5.12146	KCNQ1;HBB	0.142857	0.761601
GO_Biological_Process_2021	receptor transactivation	1/5	0.12814	0.57705	0	0	9.00694	18.506	ADRA2A	0.2	0.892315			GO_Biological_Process_2021	ovarian follicle development	2/14	0.17314	0.956808	0	0	2.92045	5.12146	CEBPB;KIT	0.142857	0.761601
GO_Biological_Process_2021	amine transport	1/5	0.12814	0.57705	0	0	9.00694	18.506	SLC18A2	0.2	0.892315			GO_Biological_Process_2021	defense response to protozoan	2/14	0.17314	0.956808	0	0	2.92045	5.12146	CD40;SLC11A1	0.142857	0.761601
GO_Biological_Process_2021	protein sialylation	1/5	0.12814	0.57705	0	0	9.00694	18.506	ST8SIA3	0.2	0.892315			Reactome_2016	LGI-ADAM interactions	2/14	0.17314	0.999996	0	0	2.92045	5.12146	ADAM23;ADAM11	0.142857	0.761601
GO_Biological_Process_2021	fructose 2,6-bisphosphate metabolic process	1/5	0.12814	0.57705	0	0	9.00694	18.506	PFKFB3	0.2	0.892315			Reactome_2016	SEMA3A-Plexin repulsion signaling by inhibiting Integrin adhesion	2/14	0.17314	0.999996	0	0	2.92045	5.12146	FES;RND1	0.142857	0.761601
GO_Biological_Process_2021	regulation of synaptic vesicle recycling	1/5	0.12814	0.57705	0	0	9.00694	18.506	SNCA	0.2	0.892315			Reactome_2016	Activation of Rac	2/14	0.17314	0.999996	0	0	2.92045	5.12146	PAK6;SLIT2	0.142857	0.761601
GO_Biological_Process_2021	regulation of respiratory gaseous exchange by nervous system process	1/5	0.12814	0.57705	0	0	9.00694	18.506	TSHZ3	0.2	0.892315			Reactome_2016	Synthesis of bile acids and bile salts via 24-hydroxycholesterol	2/14	0.17314	0.999996	0	0	2.92045	5.12146	CYP27A1;HSD3B7	0.142857	0.761601
Reactome_2016	GRB7 events in ERBB2 signaling	1/5	0.12814	0.940667	0	0	9.00694	18.506	NRG1	0.2	0.892315			GO_Biological_Process_2021	heterochromatin organization	2/14	0.17314	0.956808	0	0	2.92045	5.12146	MECOM;PRDM16	0.142857	0.761601
GO_Biological_Process_2021	positive regulation of amine transport	1/5	0.12814	0.57705	0	0	9.00694	18.506	KCNB1	0.2	0.892315			GO_Biological_Process_2021	positive regulation of leukocyte degranulation	2/14	0.17314	0.956808	0	0	2.92045	5.12146	FGR;SYK	0.142857	0.761601
GO_Biological_Process_2021	negative regulation of cGMP-mediated signaling	1/5	0.12814	0.57705	0	0	9.00694	18.506	PDE10A	0.2	0.892315			GO_Biological_Process_2021	positive regulation of brown fat cell differentiation	2/14	0.17314	0.956808	0	0	2.92045	5.12146	SOX13;METRNL	0.142857	0.761601
GO_Biological_Process_2021	negative regulation of collateral sprouting	1/5	0.12814	0.57705	0	0	9.00694	18.506	FGF13	0.2	0.892315			GO_Biological_Process_2021	regulation of macrophage cytokine production	2/14	0.17314	0.956808	0	0	2.92045	5.12146	GPRC5B;IRAK3	0.142857	0.761601
GO_Biological_Process_2021	negative regulation of gene silencing by RNA	1/5	0.12814	0.57705	0	0	9.00694	18.506	TGFB1	0.2	0.892315			GO_Biological_Process_2021	negative regulation of viral transcription	2/14	0.17314	0.956808	0	0	2.92045	5.12146	IFITM3;ZFP36	0.142857	0.761601
GO_Biological_Process_2021	negative regulation of leukocyte adhesion to vascular endothelial cell	1/5	0.12814	0.57705	0	0	9.00694	18.506	CXCL12	0.2	0.892315			GO_Biological_Process_2021	response to UV-A	2/14	0.17314	0.956808	0	0	2.92045	5.12146	CCND1;MMP2	0.142857	0.761601
GO_Biological_Process_2021	negative regulation of macrophage cytokine production	1/5	0.12814	0.57705	0	0	9.00694	18.506	TGFB1	0.2	0.892315			GO_Biological_Process_2021	intestinal absorption	2/14	0.17314	0.956808	0	0	2.92045	5.12146	FABP2;KCNQ1	0.142857	0.761601
GO_Biological_Process_2021	negative regulation of posttranscriptional gene silencing	1/5	0.12814	0.57705	0	0	9.00694	18.506	TGFB1	0.2	0.892315			GO_Biological_Process_2021	sequestering of extracellular ligand from receptor	2/14	0.17314	0.956808	0	0	2.92045	5.12146	BMP2;FSTL1	0.142857	0.761601
GO_Biological_Process_2021	negative regulation of skeletal muscle cell differentiation	1/5	0.12814	0.57705	0	0	9.00694	18.506	EPHB1	0.2	0.892315			GO_Biological_Process_2021	synaptic membrane adhesion	2/14	0.17314	0.956808	0	0	2.92045	5.12146	NTNG1;GPC4	0.142857	0.761601
GO_Biological_Process_2021	negative regulation of transcription by RNA polymerase I	1/5	0.12814	0.57705	0	0	9.00694	18.506	FLNA	0.2	0.892315			GO_Biological_Process_2021	negative regulation of coagulation	2/14	0.17314	0.956808	0	0	2.92045	5.12146	PROCR;HS3ST5	0.142857	0.761601
GO_Biological_Process_2021	peptidyl-lysine oxidation	1/5	0.12814	0.57705	0	0	9.00694	18.506	LOXL3	0.2	0.892315			GO_Biological_Process_2021	negative regulation of pri-miRNA transcription by RNA polymerase II	2/14	0.17314	0.956808	0	0	2.92045	5.12146	NFIB;SOX9	0.142857	0.761601
GO_Biological_Process_2021	peristalsis	1/5	0.12814	0.57705	0	0	9.00694	18.506	NEUROG1	0.2	0.892315			GO_Biological_Process_2021	negative regulation of smooth muscle cell migration	2/14	0.17314	0.956808	0	0	2.92045	5.12146	SLIT2;AIF1	0.142857	0.761601
GO_Biological_Process_2021	positive regulation of axon extension involved in axon guidance	1/5	0.12814	0.57705	0	0	9.00694	18.506	DSCAM	0.2	0.892315			GO_Biological_Process_2021	negative regulation of cytokine-mediated signaling pathway	5/55	0.175069	0.956808	0	0	1.75362	3.05582	PALM3;IRAK3;SLIT2;CCDC3;USP18	0.0909091	0.756791
GO_Biological_Process_2021	negative regulation of B cell differentiation	1/5	0.12814	0.57705	0	0	9.00694	18.506	ID2	0.2	0.892315			Reactome_2016	Ion transport by P-type ATPases	5/55	0.175069	0.999996	0	0	1.75362	3.05582	ATP8B1;ATP2A3;ATP2B4;ATP11C;ATP2C2	0.0909091	0.756791
GO_Biological_Process_2021	positive regulation of cardioblast differentiation	1/5	0.12814	0.57705	0	0	9.00694	18.506	GATA4	0.2	0.892315			GO_Biological_Process_2021	sphingolipid metabolic process	9/116	0.175777	0.956808	0	0	1.47604	2.56616	UGT8;GAL3ST1;PPM1L;SPTLC3;HEXB;SPNS2;ESYT3;DEGS2;HACD4	0.0775862	0.755039
GO_Biological_Process_2021	positive regulation of hippo signaling	1/5	0.12814	0.57705	0	0	9.00694	18.506	SOX11	0.2	0.892315			GO_Biological_Process_2021	wound healing	6/70	0.176617	0.956808	0	0	1.64433	2.8509	COL3A1;JAML;SLC11A1;FUT10;FZD7;SYTL4	0.0857143	0.752969
GO_Biological_Process_2021	positive regulation of protein kinase C activity	1/5	0.12814	0.57705	0	0	9.00694	18.506	CEMIP	0.2	0.892315			Reactome_2016	Synthesis of bile acids and bile salts	3/27	0.177066	0.999996	0	0	2.19098	3.79309	CYP27A1;HSD3B7;ACOX2	0.111111	0.751864
GO_Biological_Process_2021	postsynaptic density protein 95 clustering	1/5	0.12814	0.57705	0	0	9.00694	18.506	NLGN1	0.2	0.892315			Reactome_2016	Uptake and actions of bacterial toxins	3/27	0.177066	0.999996	0	0	2.19098	3.79309	CD9;MAP2K6;HBEGF	0.111111	0.751864
GO_Biological_Process_2021	proline transmembrane transport	1/5	0.12814	0.57705	0	0	9.00694	18.506	SLC36A1	0.2	0.892315			Reactome_2016	Integrin alphaIIb beta3 signaling	3/27	0.177066	0.999996	0	0	2.19098	3.79309	APBB1IP;SYK;FN1	0.111111	0.751864
Reactome_2016	Hyaluronan biosynthesis and export	1/5	0.12814	0.940667	0	0	9.00694	18.506	CEMIP	0.2	0.892315			Reactome_2016	Sema4D in semaphorin signaling	3/27	0.177066	0.999996	0	0	2.19098	3.79309	MYH14;MYL9;RND1	0.111111	0.751864
Reactome_2016	Leukotriene receptors	1/5	0.12814	0.940667	0	0	9.00694	18.506	CYSLTR2	0.2	0.892315			Reactome_2016	Platelet calcium homeostasis	3/27	0.177066	0.999996	0	0	2.19098	3.79309	ATP2A3;ATP2B4;ITPR2	0.111111	0.751864
Reactome_2016	Tachykinin receptors bind tachykinins	1/5	0.12814	0.940667	0	0	9.00694	18.506	TAC1	0.2	0.892315			GO_Biological_Process_2021	bile acid biosynthetic process	3/27	0.177066	0.956808	0	0	2.19098	3.79309	CYP27A1;HSD3B7;ACOX2	0.111111	0.751864
Reactome_2016	NGF-independant TRKA activation	1/5	0.12814	0.940667	0	0	9.00694	18.506	ADCYAP1R1	0.2	0.892315			GO_Biological_Process_2021	negative regulation of plasma membrane bounded cell projection assembly	3/27	0.177066	0.956808	0	0	2.19098	3.79309	YAP1;TACSTD2;SLIT2	0.111111	0.751864
Reactome_2016	PTK6 Regulates Proteins Involved in RNA Processing	1/5	0.12814	0.940667	0	0	9.00694	18.506	KHDRBS3	0.2	0.892315			GO_Biological_Process_2021	regulation of cardiac muscle cell contraction	3/27	0.177066	0.956808	0	0	2.19098	3.79309	JUP;STC1;TRPM4	0.111111	0.751864
GO_Biological_Process_2021	fructose catabolic process to hydroxyacetone phosphate and glyceraldehyde-3-phosphate	1/5	0.12814	0.57705	0	0	9.00694	18.506	ALDOB	0.2	0.892315			GO_Biological_Process_2021	negative regulation of protein polymerization	3/27	0.177066	0.956808	0	0	2.19098	3.79309	SLIT2;TUBB4A;KANK3	0.111111	0.751864
GO_Biological_Process_2021	negative regulation of cardiac muscle cell proliferation	1/5	0.12814	0.57705	0	0	9.00694	18.506	TP73	0.2	0.892315			GO_Biological_Process_2021	negative regulation of cell-cell adhesion	4/41	0.179213	0.956808	0	0	1.89535	3.25846	BMP2;AKNA;RGCC;CDH1	0.097561	0.74663
GO_Biological_Process_2021	zygotic determination of anterior/posterior axis, embryo	1/5	0.12814	0.57705	0	0	9.00694	18.506	NEUROG1	0.2	0.892315			GO_Biological_Process_2021	regulation of mitochondrial membrane potential	4/41	0.179213	0.956808	0	0	1.89535	3.25846	OPRD1;PMAIP1;SLC25A33;RNF122	0.097561	0.74663
GO_Biological_Process_2021	salivary gland development	1/5	0.12814	0.57705	0	0	9.00694	18.506	TGFB1	0.2	0.892315			GO_Biological_Process_2021	cortical cytoskeleton organization	4/41	0.179213	0.956808	0	0	1.89535	3.25846	FMNL3;LCP1;RND3;RND1	0.097561	0.74663
GO_Biological_Process_2021	G protein-coupled opioid receptor signaling pathway	1/5	0.12814	0.57705	0	0	9.00694	18.506	OPRK1	0.2	0.892315			KEGG_2021_Human	Bladder cancer	4/41	0.179213	0.999994	0	0	1.89535	3.25846	CCND1;CDH1;MMP2;HBEGF	0.097561	0.74663
GO_Biological_Process_2021	gamma-aminobutyric acid metabolic process	1/5	0.12814	0.57705	0	0	9.00694	18.506	GAD1	0.2	0.892315			GO_Biological_Process_2021	regulation of cell cycle	20/296	0.180173	0.956808	0	0	1.27327	2.18218	NOTCH2;PPP1R15A;ZBED9;TCF7L2;GATA6;PTPRK;ALOX15B;BMP2;TFAP4;RGCC;MCIDAS;MECOM;CCND1;SOX9;NUPR1;JUNB;FGFR2;RPRM;MAP2K6;NKX3-1	0.0675676	0.744311
GO_Biological_Process_2021	glomerular visceral epithelial cell migration	1/5	0.12814	0.57705	0	0	9.00694	18.506	KANK1	0.2	0.892315			GO_Biological_Process_2021	regulation of neuron projection development	12/165	0.182699	0.956808	0	0	1.37684	2.34051	NTNG1;ARC;MAG;FES;PTK7;PLPPR5;ACP4;GPC2;EFHC2;PTN;MT3;LZTS3	0.0727273	0.738263
GO_Biological_Process_2021	glutamate catabolic process	1/5	0.12814	0.57705	0	0	9.00694	18.506	GAD1	0.2	0.892315			GO_Biological_Process_2021	sensory organ development	5/56	0.184321	0.956808	0	0	1.71915	2.90721	SIX6;RBP4;MEIS1;ADAMTS18;MEIS2	0.0892857	0.734426
GO_Biological_Process_2021	regulation of voltage-gated sodium channel activity	1/5	0.12814	0.57705	0	0	9.00694	18.506	FGF13	0.2	0.892315			GO_Biological_Process_2021	regulation of signal transduction	14/198	0.185207	0.956808	0	0	1.33598	2.25283	SEMA5A;WWTR1;HOMER1;PXN;DTX1;DCDC2;TSPAN12;OVOL2;ELF1;VWA2;RGS12;RGS6;FGFR2;ACTRT1	0.0707071	0.732342
GO_Biological_Process_2021	hematopoietic stem cell migration	1/5	0.12814	0.57705	0	0	9.00694	18.506	GAS6	0.2	0.892315			GO_Biological_Process_2021	cell junction assembly	8/102	0.186434	0.956808	0	0	1.49313	2.50798	NLGN3;CDH1;SPOCK2;FSCN1;FN1;CDH12;DCHS1;GRHL2	0.0784314	0.729475
GO_Biological_Process_2021	His-Purkinje system development	1/5	0.12814	0.57705	0	0	9.00694	18.506	ID2	0.2	0.892315			GO_Biological_Process_2021	regulation of MAPK cascade	12/166	0.187958	0.956808	0	0	1.36783	2.28637	BMP2;GPR37;SYK;KIT;FN1;PAK6;ROS1;FGFR2;ARHGEF5;TMEM106A;STK3;FGFR1	0.0722892	0.725939
GO_Biological_Process_2021	response to morphine	1/5	0.12814	0.57705	0	0	9.00694	18.506	PRKCG	0.2	0.892315			GO_Biological_Process_2021	brain development	11/150	0.188736	0.956808	0	0	1.38896	2.31596	EGR2;CA10;MEIS1;NFIB;B3GNT5;AATK;CXCR4;CNTN4;SOX6;GRHL2;MEIS2	0.0733333	0.724146
GO_Biological_Process_2021	response to prostaglandin	1/5	0.12814	0.57705	0	0	9.00694	18.506	TGFBR3	0.2	0.892315			GO_Biological_Process_2021	ceramide biosynthetic process	4/42	0.19023	0.956808	0	0	1.84538	3.06244	SPTLC3;ST8SIA4;DEGS2;ST6GALNAC5	0.0952381	0.72072
GO_Biological_Process_2021	middle ear morphogenesis	1/5	0.12814	0.57705	0	0	9.00694	18.506	OSR1	0.2	0.892315			GO_Biological_Process_2021	positive regulation of epithelial to mesenchymal transition	4/42	0.19023	0.956808	0	0	1.84538	3.06244	TCF7L2;WWTR1;BMP2;RGCC	0.0952381	0.72072
GO_Biological_Process_2021	histone-threonine phosphorylation	1/5	0.12814	0.57705	0	0	9.00694	18.506	PRKCB	0.2	0.892315			Reactome_2016	Signaling by Retinoic Acid	4/42	0.19023	0.999996	0	0	1.84538	3.06244	CPT1A;ALDH1A1;PDK4;RDH16	0.0952381	0.72072
GO_Biological_Process_2021	salivary gland morphogenesis	1/5	0.12814	0.57705	0	0	9.00694	18.506	TGFB1	0.2	0.892315			GO_Biological_Process_2021	regulation of chemokine production	4/42	0.19023	0.956808	0	0	1.84538	3.06244	AIRE;AIF1;ALOX15B;TLR3	0.0952381	0.72072
GO_Biological_Process_2021	sensory perception of sour taste	1/5	0.12814	0.57705	0	0	9.00694	18.506	ASIC2	0.2	0.892315			Reactome_2016	Retinoid metabolism and transport	4/42	0.19023	0.999996	0	0	1.84538	3.06244	RBP4;SDC3;GPC2;GPC4	0.0952381	0.72072
GO_Biological_Process_2021	L-methionine salvage from methylthioadenosine	1/5	0.12814	0.57705	0	0	9.00694	18.506	MTAP	0.2	0.892315			Reactome_2016	Non-integrin membrane-ECM interactions	4/42	0.19023	0.999996	0	0	1.84538	3.06244	LAMA1;SDC3;LAMC2;DMD	0.0952381	0.72072
GO_Biological_Process_2021	striated muscle cell proliferation	1/5	0.12814	0.57705	0	0	9.00694	18.506	TGFBR3	0.2	0.892315			Reactome_2016	Deactivation of the beta-catenin transactivating complex	4/42	0.19023	0.999996	0	0	1.84538	3.06244	TCF7L2;SOX13;SOX9;SOX6	0.0952381	0.72072
GO_Biological_Process_2021	lung morphogenesis	1/5	0.12814	0.57705	0	0	9.00694	18.506	SOX11	0.2	0.892315			Reactome_2016	Platelet homeostasis	7/87	0.190301	0.999996	0	0	1.53483	2.54652	FGR;ATP2A3;ATP2B4;PDE3A;ITPR2;PDE5A;GNG13	0.0804598	0.720558
GO_Biological_Process_2021	lymph node development	1/5	0.12814	0.57705	0	0	9.00694	18.506	TGFB1	0.2	0.892315			Reactome_2016	Ca-dependent events	3/28	0.190887	0.999996	0	0	2.10323	3.4831	PDE1C;PRKAR2B;ADCY4	0.107143	0.719224
GO_Biological_Process_2021	thorax and anterior abdomen determination	1/5	0.12814	0.57705	0	0	9.00694	18.506	NEUROG1	0.2	0.892315			GO_Biological_Process_2021	positive regulation of nitric oxide metabolic process	3/28	0.190887	0.956808	0	0	2.10323	3.4831	DDAH2;HBB;TMEM106A	0.107143	0.719224
GO_Biological_Process_2021	mesonephric duct development	1/5	0.12814	0.57705	0	0	9.00694	18.506	OSR1	0.2	0.892315			GO_Biological_Process_2021	regulation of calcineurin-NFAT signaling cascade	3/28	0.190887	0.956808	0	0	2.10323	3.4831	HOMER2;ATP2B4;HOMER3	0.107143	0.719224
GO_Biological_Process_2021	metanephric epithelium development	1/5	0.12814	0.57705	0	0	9.00694	18.506	OSR1	0.2	0.892315			GO_Biological_Process_2021	regulation of plasma membrane bounded cell projection organization	3/28	0.190887	0.956808	0	0	2.10323	3.4831	NTNG1;HOMER1;EFHC2	0.107143	0.719224
GO_Biological_Process_2021	metanephric mesenchymal cell differentiation	1/5	0.12814	0.57705	0	0	9.00694	18.506	OSR1	0.2	0.892315			GO_Biological_Process_2021	regulation of postsynapse organization	3/28	0.190887	0.956808	0	0	2.10323	3.4831	ARC;HOMER1;LZTS3	0.107143	0.719224
Reactome_2016	Transport of inorganic cations/anions and amino acids/oligopeptides	5/99	0.130643	0.940667	0	0	1.92174	3.91129	SLC9A2;SLC36A1;SLC6A19;SLC8A2;SLC38A4	0.0505051	0.883912			Reactome_2016	GRB2:SOS provides linkage to MAPK signaling for Integrins	2/15	0.193006	0.999996	0	0	2.69566	4.43445	APBB1IP;FN1	0.133333	0.71443
KEGG_2021_Human	Non-small cell lung cancer	4/72	0.130644	0.928438	0	0	2.12411	4.32316	PRKCG;CDKN1A;PRKCB;RASSF5	0.0555556	0.883912			Reactome_2016	N-Glycan antennae elongation	2/15	0.193006	0.999996	0	0	2.69566	4.43445	MGAT4C;MGAT5	0.133333	0.71443
GO_Biological_Process_2021	extracellular structure organization	9/216	0.132899	0.57705	0	0	1.57339	3.17536	ADAMTS5;COL2A1;TTR;COL5A1;LAMC3;COL6A2;COL6A1;FBN1;ADAMTS20	0.0416667	0.876477			GO_Biological_Process_2021	protein kinase A signaling	2/15	0.193006	0.956808	0	0	2.69566	4.43445	GAL;LCP1	0.133333	0.71443
GO_Biological_Process_2021	positive regulation of pathway-restricted SMAD protein phosphorylation	3/47	0.13384	0.57705	0	0	2.4605	4.94833	DAB2;TGFB1;BMP6	0.0638298	0.873413			GO_Biological_Process_2021	positive regulation of endothelial cell chemotaxis	2/15	0.193006	0.956808	0	0	2.69566	4.43445	SEMA5A;FGFR1	0.133333	0.71443
GO_Biological_Process_2021	regulation of protein localization to nucleus	3/47	0.13384	0.57705	0	0	2.4605	4.94833	NGFR;TGFB1;GTSE1	0.0638298	0.873413			GO_Biological_Process_2021	regulation of branching involved in ureteric bud morphogenesis	2/15	0.193006	0.956808	0	0	2.69566	4.43445	TACSTD2;SOX9	0.133333	0.71443
GO_Biological_Process_2021	regulation of wound healing	3/47	0.13384	0.57705	0	0	2.4605	4.94833	KANK1;ADRA2A;AJAP1	0.0638298	0.873413			Reactome_2016	Synthesis of bile acids and bile salts via 27-hydroxycholesterol	2/15	0.193006	0.999996	0	0	2.69566	4.43445	CYP27A1;HSD3B7	0.133333	0.71443
GO_Biological_Process_2021	negative regulation of cold-induced thermogenesis	3/47	0.13384	0.57705	0	0	2.4605	4.94833	ADAMTS5;PLCL1;ZNF423	0.0638298	0.873413			GO_Biological_Process_2021	cellular response to arsenic-containing substance	2/15	0.193006	0.956808	0	0	2.69566	4.43445	GSTO2;ATF3	0.133333	0.71443
GO_Biological_Process_2021	regulation of hydrolase activity	4/73	0.135456	0.57705	0	0	2.09322	4.18457	BVES;PRKG1;EPHA3;PLXNA4	0.0547945	0.868203			GO_Biological_Process_2021	regulation of extracellular matrix disassembly	2/15	0.193006	0.956808	0	0	2.69566	4.43445	DPP4;FSCN1	0.133333	0.71443
GO_Biological_Process_2021	external encapsulating structure organization	9/217	0.13556	0.57705	0	0	1.56574	3.12889	ADAMTS5;COL2A1;TTR;COL5A1;LAMC3;COL6A2;COL6A1;FBN1;ADAMTS20	0.0414747	0.867869			GO_Biological_Process_2021	regulation of phospholipase C activity	2/15	0.193006	0.956808	0	0	2.69566	4.43445	KIT;FGFR1	0.133333	0.71443
GO_Biological_Process_2021	sulfur amino acid metabolic process	2/24	0.1366	0.57705	0	0	3.27829	6.5261	GADL1;MAT1A	0.0833333	0.86455			GO_Biological_Process_2021	fatty acid beta-oxidation using acyl-CoA oxidase	2/15	0.193006	0.956808	0	0	2.69566	4.43445	ACOX2;CROT	0.133333	0.71443
GO_Biological_Process_2021	positive regulation of transforming growth factor beta receptor signaling pathway	2/24	0.1366	0.57705	0	0	3.27829	6.5261	CDKN2B;DAB2	0.0833333	0.86455			GO_Biological_Process_2021	ganglioside biosynthetic process	2/15	0.193006	0.956808	0	0	2.69566	4.43445	ST8SIA4;ST6GALNAC5	0.133333	0.71443
GO_Biological_Process_2021	positive regulation of protein targeting to membrane	2/24	0.1366	0.57705	0	0	3.27829	6.5261	CEMIP;KCNB1	0.0833333	0.86455			GO_Biological_Process_2021	medium-chain fatty acid metabolic process	2/15	0.193006	0.956808	0	0	2.69566	4.43445	GLYATL2;CROT	0.133333	0.71443
GO_Biological_Process_2021	negative regulation of synaptic transmission	2/24	0.1366	0.57705	0	0	3.27829	6.5261	PLK2;GRIK3	0.0833333	0.86455			GO_Biological_Process_2021	negative regulation of cellular component movement	2/15	0.193006	0.956808	0	0	2.69566	4.43445	TACSTD2;CD9	0.133333	0.71443
GO_Biological_Process_2021	protein kinase B signaling	2/24	0.1366	0.57705	0	0	3.27829	6.5261	TGFB1;GAS6	0.0833333	0.86455			Reactome_2016	p130Cas linkage to MAPK signaling for integrins	2/15	0.193006	0.999996	0	0	2.69566	4.43445	APBB1IP;FN1	0.133333	0.71443
GO_Biological_Process_2021	glucose catabolic process to pyruvate	2/24	0.1366	0.57705	0	0	3.27829	6.5261	PKLR;ALDOB	0.0833333	0.86455			GO_Biological_Process_2021	positive regulation of membrane protein ectodomain proteolysis	2/15	0.193006	0.956808	0	0	2.69566	4.43445	PACSIN3;SNX33	0.133333	0.71443
GO_Biological_Process_2021	cellular response to catecholamine stimulus	2/24	0.1366	0.57705	0	0	3.27829	6.5261	PDE4B;SNCA	0.0833333	0.86455			GO_Biological_Process_2021	peptidyl-tyrosine autophosphorylation	2/15	0.193006	0.956808	0	0	2.69566	4.43445	TEC;AATK	0.133333	0.71443
GO_Biological_Process_2021	canonical glycolysis	2/24	0.1366	0.57705	0	0	3.27829	6.5261	PKLR;ALDOB	0.0833333	0.86455			KEGG_2021_Human	Protein digestion and absorption	8/103	0.193298	0.999994	0	0	1.47733	2.42803	DPP4;COL18A1;COL3A1;COL13A1;COL25A1;KCNQ1;COL5A3;COL4A5	0.0776699	0.713774
GO_Biological_Process_2021	regulation of axon extension involved in axon guidance	2/24	0.1366	0.57705	0	0	3.27829	6.5261	DSCAM;SEMA3D	0.0833333	0.86455			Reactome_2016	Diseases of glycosylation	7/88	0.19786	0.999996	0	0	1.51581	2.4559	SEMA5A;NOTCH2;NOTCH3;ADAMTS18;SDC3;GPC2;GPC4	0.0795455	0.703641
GO_Biological_Process_2021	positive regulation of cellular response to transforming growth factor beta stimulus	2/24	0.1366	0.57705	0	0	3.27829	6.5261	CDKN2B;DAB2	0.0833333	0.86455			GO_Biological_Process_2021	cellular metal ion homeostasis	8/104	0.200265	0.956808	0	0	1.46187	2.35085	CASR;CD40;ATP2A3;RGN;ATP2B4;STC1;ATP2C2;MT3	0.0769231	0.698396
GO_Biological_Process_2021	skeletal system development	7/158	0.137488	0.57705	0	0	1.67617	3.32588	KIAA1217;PTGER4;COL2A1;ZBTB16;SOX11;BMP6;FBN1	0.0443038	0.861736			GO_Biological_Process_2021	cytoskeleton organization	9/120	0.20113	0.956808	0	0	1.42255	2.28149	CNN2;FMNL3;ARHGAP10;ARC;SEMA6A;PACSIN3;PAK6;RND3;RND1	0.075	0.696523
KEGG_2021_Human	Purine metabolism	6/129	0.137594	0.928438	0	0	1.76303	3.49687	GUCY1A2;NT5E;PDE10A;PKLR;PDE4B;AK4	0.0465116	0.8614			GO_Biological_Process_2021	lipid modification	4/43	0.201455	0.956808	0	0	1.79797	2.88068	PLPPR1;PLPPR3;PLPPR5;ALOX15B	0.0930233	0.695822
GO_Biological_Process_2021	negative regulation of mitotic cell cycle	3/48	0.140069	0.57705	0	0	2.4057	4.72869	BRINP1;TGFB1;PLK2	0.0625	0.853658			GO_Biological_Process_2021	positive regulation of neuron differentiation	4/43	0.201455	0.956808	0	0	1.79797	2.88068	BMP2;GPRC5B;ARHGEF2;FGFR1	0.0930233	0.695822
Reactome_2016	EPH-ephrin mediated repulsion of cells	3/48	0.140069	0.940667	0	0	2.4057	4.72869	EPHA7;EPHB1;EPHA3	0.0625	0.853658			GO_Biological_Process_2021	positive regulation of peptide hormone secretion	4/43	0.201455	0.956808	0	0	1.79797	2.88068	TCF7L2;RBP4;RASL10B;FFAR4	0.0930233	0.695822
Reactome_2016	TP53 Regulates Transcription of Cell Cycle Genes	3/48	0.140069	0.940667	0	0	2.4057	4.72869	CDKN1A;PLAGL1;PLK2	0.0625	0.853658			Reactome_2016	Iron uptake and transport	4/43	0.201455	0.999996	0	0	1.79797	2.88068	SLC40A1;CYBRD1;CP;ATP6V1B1	0.0930233	0.695822
GO_Biological_Process_2021	DNA damage response, signal transduction by p53 class mediator	4/74	0.140339	0.57705	0	0	2.06321	4.05151	CDKN1A;PLAGL1;PLK2;GTSE1	0.0540541	0.852822			Reactome_2016	Voltage gated Potassium channels	4/43	0.201455	0.999996	0	0	1.79797	2.88068	KCNG3;KCNC3;KCNB2;KCNQ1	0.0930233	0.695822
GO_Biological_Process_2021	regulation of cell death	5/102	0.142886	0.57705	0	0	1.86202	3.62294	CIDEB;SOX11;SNCB;EPHB1;SNCA	0.0490196	0.845009			GO_Biological_Process_2021	central nervous system development	18/268	0.202221	0.956808	0	0	1.2645	2.02117	EGR2;CA10;PROP1;AATK;CXCR4;CAPG;GRHL2;MEIS2;UGT8;MEIS1;NFIB;B3GNT5;ADAM23;DCX;SOX9;CNTN4;SOX6;NEUROG3	0.0671642	0.694173
KEGG_2021_Human	Thyroid hormone synthesis	4/75	0.145291	0.928438	0	0	2.03404	3.9237	PRKCG;TTR;CREB3L3;PRKCB	0.0533333	0.837761			GO_Biological_Process_2021	cellular iron ion homeostasis	5/58	0.203337	0.956808	0	0	1.6541	2.6348	ALAS2;SLC11A1;SLC40A1;CYBRD1;CP	0.0862069	0.691783
Reactome_2016	Amino acid synthesis and interconversion (transamination)	2/25	0.145947	0.940667	0	0	3.1356	6.03449	ASPG;GADL1	0.08	0.835804			GO_Biological_Process_2021	fat cell differentiation	5/58	0.203337	0.956808	0	0	1.6541	2.6348	TCF7L2;EGR2;PRDM16;FFAR4;METRNL	0.0862069	0.691783
Reactome_2016	Sulfur amino acid metabolism	2/25	0.145947	0.940667	0	0	3.1356	6.03449	MTAP;MAT1A	0.08	0.835804			Reactome_2016	YAP1- and WWTR1 (TAZ)-stimulated gene expression	3/29	0.204967	0.999996	0	0	2.02223	3.20505	YAP1;WWTR1;TEAD2	0.103448	0.688317
Reactome_2016	Activation of G protein gated Potassium channels	2/25	0.145947	0.940667	0	0	3.1356	6.03449	KCNJ2;KCNJ3	0.08	0.835804			GO_Biological_Process_2021	glial cell differentiation	3/29	0.204967	0.956808	0	0	2.02223	3.20505	EGR2;NFIB;SOX9	0.103448	0.688317
Reactome_2016	Inhibition of voltage gated Ca2+ channels via Gbeta/gamma subunits	2/25	0.145947	0.940667	0	0	3.1356	6.03449	KCNJ2;KCNJ3	0.08	0.835804			GO_Biological_Process_2021	positive regulation of leukocyte migration	3/29	0.204967	0.956808	0	0	2.02223	3.20505	LGALS3;PTN;AIF1	0.103448	0.688317
Reactome_2016	G protein gated Potassium channels	2/25	0.145947	0.940667	0	0	3.1356	6.03449	KCNJ2;KCNJ3	0.08	0.835804			GO_Biological_Process_2021	hydrogen peroxide metabolic process	3/29	0.204967	0.956808	0	0	2.02223	3.20505	HBM;HBE1;HBB	0.103448	0.688317
GO_Biological_Process_2021	positive regulation of vascular endothelial growth factor production	2/25	0.145947	0.57705	0	0	3.1356	6.03449	TGFB1;GATA4	0.08	0.835804			GO_Biological_Process_2021	positive regulation of cell migration	18/269	0.206551	0.956808	0	0	1.2594	1.98634	SEMA5A;DOCK5;SEMA6A;SEMA3C;SEMA6D;FN1;GAB1;LAMC2;AIF1;FGR;MMP14;BMP2;MGAT5;KIT;SOX9;ARHGEF2;S100A11;HBEGF	0.0669145	0.684973
KEGG_2021_Human	alpha-Linolenic acid metabolism	2/25	0.145947	0.928438	0	0	3.1356	6.03449	PLA2G12B;PLB1	0.08	0.835804			KEGG_2021_Human	PPAR signaling pathway	6/74	0.210068	0.999994	0	0	1.54728	2.41426	CYP27A1;FABP2;CPT1A;ACOX2;ANGPTL4;CPT1C	0.0810811	0.67764
GO_Biological_Process_2021	cellular response to hexose stimulus	2/25	0.145947	0.57705	0	0	3.1356	6.03449	KCNB1;GAS6	0.08	0.835804			GO_Biological_Process_2021	sphingolipid biosynthetic process	6/74	0.210068	0.956808	0	0	1.54728	2.41426	PPM1L;SPTLC3;SPNS2;DEGS2;ST6GALNAC5;HACD4	0.0810811	0.67764
GO_Biological_Process_2021	positive regulation of peptidyl-threonine phosphorylation	2/25	0.145947	0.57705	0	0	3.1356	6.03449	CEMIP;TGFB1	0.08	0.835804			GO_Biological_Process_2021	branching morphogenesis of an epithelial tube	4/44	0.21287	0.956808	0	0	1.75292	2.7119	BMP2;SLIT2;NKX3-1;ENG	0.0909091	0.671885
GO_Biological_Process_2021	negative regulation of signaling	2/25	0.145947	0.57705	0	0	3.1356	6.03449	GLRA1;KIF26A	0.08	0.835804			GO_Biological_Process_2021	positive regulation of osteoblast differentiation	4/44	0.21287	0.956808	0	0	1.75292	2.7119	YAP1;WWTR1;BMP2;FFAR4	0.0909091	0.671885
GO_Biological_Process_2021	negative regulation of ion transport	2/25	0.145947	0.57705	0	0	3.1356	6.03449	ADRA2A;SNCA	0.08	0.835804			GO_Biological_Process_2021	mRNA stabilization	4/44	0.21287	0.956808	0	0	1.75292	2.7119	ZFP36;SLC11A1;IGF2BP1;YBX3	0.0909091	0.671885
GO_Biological_Process_2021	glycolytic process through glucose-6-phosphate	2/25	0.145947	0.57705	0	0	3.1356	6.03449	PKLR;ALDOB	0.08	0.835804			GO_Biological_Process_2021	homotypic cell-cell adhesion	4/44	0.21287	0.956808	0	0	1.75292	2.7119	CSRP1;FN1;HBB;MYL9	0.0909091	0.671885
GO_Biological_Process_2021	energy derivation by oxidation of organic compounds	2/25	0.145947	0.57705	0	0	3.1356	6.03449	PID1;GFPT2	0.08	0.835804			GO_Biological_Process_2021	regulation of endothelial cell apoptotic process	4/44	0.21287	0.956808	0	0	1.75292	2.7119	SEMA5A;CD40;RGCC;ANGPT1	0.0909091	0.671885
GO_Biological_Process_2021	chemical synaptic transmission, postsynaptic	2/25	0.145947	0.57705	0	0	3.1356	6.03449	GLRA1;GRID2	0.08	0.835804			GO_Biological_Process_2021	cation transmembrane transport	4/44	0.21287	0.956808	0	0	1.75292	2.7119	SLC25A29;SLC44A4;TRPM8;TRPM4	0.0909091	0.671885
GO_Biological_Process_2021	regulation of dopamine secretion	2/25	0.145947	0.57705	0	0	3.1356	6.03449	SYT4;SNCA	0.08	0.835804			Reactome_2016	PLC beta mediated events	4/44	0.21287	0.999996	0	0	1.75292	2.7119	PDE1C;PRKAR2B;ADCY4;ITPR2	0.0909091	0.671885
GO_Biological_Process_2021	regulation of cardiac muscle cell action potential	2/25	0.145947	0.57705	0	0	3.1356	6.03449	NOS1AP;FGF13	0.08	0.835804			Reactome_2016	Phospholipase C-mediated cascade; FGFR3	4/44	0.21287	0.999996	0	0	1.75292	2.7119	PDE1C;PRKAR2B;ADCY4;ITPR2	0.0909091	0.671885
GO_Biological_Process_2021	regulation of AMPA receptor activity	2/25	0.145947	0.57705	0	0	3.1356	6.03449	NLGN1;SHISA9	0.08	0.835804			GO_Biological_Process_2021	positive regulation of apoptotic signaling pathway	5/59	0.213083	0.956808	0	0	1.62338	2.50987	DDIT3;PMAIP1;NUPR1;LTBR;NKX3-1	0.0847458	0.671452
GO_Biological_Process_2021	aminoglycan biosynthetic process	3/49	0.146393	0.57705	0	0	2.35328	4.52174	HS3ST3B1;GPC5;HS3ST2	0.0612245	0.834479			GO_Biological_Process_2021	glycosphingolipid biosynthetic process	2/16	0.213141	0.956808	0	0	2.50298	3.86911	ST8SIA4;ST6GALNAC5	0.125	0.671334
GO_Biological_Process_2021	regulation of stress-activated MAPK cascade	3/49	0.146393	0.57705	0	0	2.35328	4.52174	TGFBR3;CARD9;EPHB1	0.0612245	0.834479			Reactome_2016	PI3K events in ERBB2 signaling	2/16	0.213141	0.999996	0	0	2.50298	3.86911	GAB1;HBEGF	0.125	0.671334
KEGG_2021_Human	Cocaine addiction	3/49	0.146393	0.928438	0	0	2.35328	4.52174	CREB3L3;TH;SLC18A2	0.0612245	0.834479			GO_Biological_Process_2021	regulation of fatty acid oxidation	2/16	0.213141	0.956808	0	0	2.50298	3.86911	PDK4;SOX9	0.125	0.671334
Reactome_2016	Amino acid and oligopeptide SLC transporters	3/49	0.146393	0.940667	0	0	2.35328	4.52174	SLC36A1;SLC6A19;SLC38A4	0.0612245	0.834479			GO_Biological_Process_2021	basement membrane organization	2/16	0.213141	0.956808	0	0	2.50298	3.86911	NTNG1;NID1	0.125	0.671334
Reactome_2016	Extracellular matrix organization	11/283	0.146976	0.940667	0	0	1.46405	2.80729	ADAMTS5;MFAP4;COL2A1;TGFB1;TTR;COL5A1;LAMC3;COL6A2;COL6A1;LOXL3;FBN1	0.0388693	0.832752			GO_Biological_Process_2021	3'-UTR-mediated mRNA destabilization	2/16	0.213141	0.956808	0	0	2.50298	3.86911	TRIM71;ZFP36	0.125	0.671334
Reactome_2016	MHC class II antigen presentation	5/103	0.147074	0.940667	0	0	1.84292	3.53254	KIF26A;KIF4A;IFI30;CTSC;DYNC1I1	0.0485437	0.832463			GO_Biological_Process_2021	regulation of oxidative phosphorylation	2/16	0.213141	0.956808	0	0	2.50298	3.86911	NUPR1;SLC25A33	0.125	0.671334
GO_Biological_Process_2021	negative regulation of cell differentiation	8/191	0.147527	0.57705	0	0	1.58099	3.02561	TGFB1;COL5A1;OSR1;ZBTB16;ID2;MYB;LDLRAD4;ZFPM2	0.0418848	0.831129			GO_Biological_Process_2021	mesenchyme development	2/16	0.213141	0.956808	0	0	2.50298	3.86911	BMP2;FGFR2	0.125	0.671334
Reactome_2016	Platelet activation, signaling and aggregation	10/253	0.149785	0.940667	0	0	1.48923	2.82739	PRKCG;TF;CLEC3B;SERPINA1;TGFB1;PRKCB;PROS1;FLNA;GAS6;ADRA2A	0.0395257	0.824533			Reactome_2016	TRAF6 mediated induction of TAK1 complex	2/16	0.213141	0.999996	0	0	2.50298	3.86911	LY96;TLR3	0.125	0.671334
GO_Biological_Process_2021	regulation of epithelial to mesenchymal transition	4/76	0.150311	0.57705	0	0	2.00569	3.80088	DAB2;TGFB1;LDLRAD4;EPHA3	0.0526316	0.82301			GO_Biological_Process_2021	dendritic cell chemotaxis	2/16	0.213141	0.956808	0	0	2.50298	3.86911	CXCR4;TRPM4	0.125	0.671334
GO_Biological_Process_2021	regulation of BMP signaling pathway	4/76	0.150311	0.57705	0	0	2.00569	3.80088	FST;SMAD9;SOX11;ZNF423	0.0526316	0.82301			Reactome_2016	RHO GTPases activate CIT	2/16	0.213141	0.999996	0	0	2.50298	3.86911	MYH14;MYL9	0.125	0.671334
GO_Biological_Process_2021	negative regulation of cellular response to hypoxia	1/6	0.15173	0.57705	0	0	7.20519	13.5865	DDAH1	0.166667	0.818929			Reactome_2016	PKA activation	2/16	0.213141	0.999996	0	0	2.50298	3.86911	PRKAR2B;ADCY4	0.125	0.671334
GO_Biological_Process_2021	norepinephrine biosynthetic process	1/6	0.15173	0.57705	0	0	7.20519	13.5865	TH	0.166667	0.818929			Reactome_2016	Metabolism of folate and pterines	2/16	0.213141	0.999996	0	0	2.50298	3.86911	SHMT1;MTHFD2L	0.125	0.671334
GO_Biological_Process_2021	neurotransmitter-gated ion channel clustering	1/6	0.15173	0.57705	0	0	7.20519	13.5865	NLGN1	0.166667	0.818929			GO_Biological_Process_2021	positive regulation of myeloid leukocyte cytokine production involved in immune response	2/16	0.213141	0.956808	0	0	2.50298	3.86911	GPRC5B;KIT	0.125	0.671334
GO_Biological_Process_2021	neurotransmitter loading into synaptic vesicle	1/6	0.15173	0.57705	0	0	7.20519	13.5865	SLC18A2	0.166667	0.818929			GO_Biological_Process_2021	positive regulation of endothelial cell apoptotic process	2/16	0.213141	0.956808	0	0	2.50298	3.86911	CD40;RGCC	0.125	0.671334
GO_Biological_Process_2021	neuroepithelial cell differentiation	1/6	0.15173	0.57705	0	0	7.20519	13.5865	SOX11	0.166667	0.818929			GO_Biological_Process_2021	neural tube development	2/16	0.213141	0.956808	0	0	2.50298	3.86911	TRIM71;GRHL2	0.125	0.671334
GO_Biological_Process_2021	nephron tubule development	1/6	0.15173	0.57705	0	0	7.20519	13.5865	OSR1	0.166667	0.818929			GO_Biological_Process_2021	negative regulation of platelet activation	2/16	0.213141	0.956808	0	0	2.50298	3.86911	ADAMTS18;CD9	0.125	0.671334
GO_Biological_Process_2021	positive regulation of neurotransmitter secretion	1/6	0.15173	0.57705	0	0	7.20519	13.5865	NLGN1	0.166667	0.818929			GO_Biological_Process_2021	negative regulation of DNA replication	2/16	0.213141	0.956808	0	0	2.50298	3.86911	MCIDAS;S100A11	0.125	0.671334
GO_Biological_Process_2021	negative regulation of cardiac muscle tissue growth	1/6	0.15173	0.57705	0	0	7.20519	13.5865	TP73	0.166667	0.818929			GO_Biological_Process_2021	necroptotic process	2/16	0.213141	0.956808	0	0	2.50298	3.86911	LY96;TLR3	0.125	0.671334
GO_Biological_Process_2021	negative regulation of glial cell proliferation	1/6	0.15173	0.57705	0	0	7.20519	13.5865	SOX11	0.166667	0.818929			GO_Biological_Process_2021	positive regulation of protein serine/threonine kinase activity	8/106	0.214495	0.956808	0	0	1.43188	2.20434	CD40;CCND2;RGCC;CCND1;TCIM;KIT;ATP2B4;FGFR1	0.0754717	0.668583
GO_Biological_Process_2021	nephric duct morphogenesis	1/6	0.15173	0.57705	0	0	7.20519	13.5865	OSR1	0.166667	0.818929			GO_Biological_Process_2021	regulation of phosphatidylinositol 3-kinase signaling	8/106	0.214495	0.956808	0	0	1.43188	2.20434	FGR;KIT;FN1;GAB1;SOX9;PIK3AP1;FGFR1;NKX3-1	0.0754717	0.668583
GO_Biological_Process_2021	negative regulation of trophoblast cell migration	1/6	0.15173	0.57705	0	0	7.20519	13.5865	ACVR1C	0.166667	0.818929			KEGG_2021_Human	Thyroid hormone synthesis	6/75	0.21876	0.999994	0	0	1.52477	2.31732	CREB3L4;GPX8;ADCY4;ITPR2;ASGR2;CREB5	0.08	0.660032
GO_Biological_Process_2021	negative regulation of transporter activity	1/6	0.15173	0.57705	0	0	7.20519	13.5865	SNCA	0.166667	0.818929			GO_Biological_Process_2021	regulation of cell migration	26/408	0.218806	0.956808	0	0	1.19591	1.81726	SEMA5A;PTPRU;CLIC4;SEMA3C;STC1;LAMC2;PTPRK;AIF1;CDH1;MGAT5;SRGAP3;SLIT2;SRGAP1;FGF21;NTNG1;SEMA6A;SEMA6D;ALOX15B;FGR;MMP14;BMP2;SST;STK26;KIT;ENG;HBEGF	0.0637255	0.65994
GO_Biological_Process_2021	negative regulation of myeloid cell apoptotic process	1/6	0.15173	0.57705	0	0	7.20519	13.5865	IRF7	0.166667	0.818929			GO_Biological_Process_2021	regulation of protein localization to membrane	3/30	0.219273	0.956808	0	0	1.94723	2.95479	MMP14;GPC2;GPC4	0.1	0.659014
GO_Biological_Process_2021	negative regulation of lamellipodium organization	1/6	0.15173	0.57705	0	0	7.20519	13.5865	KANK1	0.166667	0.818929			GO_Biological_Process_2021	maintenance of blood-brain barrier	3/30	0.219273	0.956808	0	0	1.94723	2.95479	DMD;ESAM;TJP3	0.1	0.659014
GO_Biological_Process_2021	negative regulation of hematopoietic progenitor cell differentiation	1/6	0.15173	0.57705	0	0	7.20519	13.5865	MYB	0.166667	0.818929			GO_Biological_Process_2021	negative regulation of cytoskeleton organization	3/30	0.219273	0.956808	0	0	1.94723	2.95479	PLEKHH2;SLIT2;KANK3	0.1	0.659014
GO_Biological_Process_2021	positive regulation of cell-cell adhesion mediated by integrin	1/6	0.15173	0.57705	0	0	7.20519	13.5865	SKAP1	0.166667	0.818929			GO_Biological_Process_2021	TRIF-dependent toll-like receptor signaling pathway	3/30	0.219273	0.956808	0	0	1.94723	2.95479	CD40;LY96;TLR3	0.1	0.659014
Reactome_2016	Proton-coupled monocarboxylate transport	1/6	0.15173	0.940667	0	0	7.20519	13.5865	SLC16A3	0.166667	0.818929			GO_Biological_Process_2021	positive regulation of protein import	3/30	0.219273	0.956808	0	0	1.94723	2.95479	JUP;CDH1;ARHGEF5	0.1	0.659014
GO_Biological_Process_2021	positive regulation of plasminogen activation	1/6	0.15173	0.57705	0	0	7.20519	13.5865	CLEC3B	0.166667	0.818929			GO_Biological_Process_2021	positive regulation of lipid kinase activity	3/30	0.219273	0.956808	0	0	1.94723	2.95479	FGR;EEF1A2;KIT	0.1	0.659014
Reactome_2016	Methionine salvage pathway	1/6	0.15173	0.940667	0	0	7.20519	13.5865	MTAP	0.166667	0.818929			GO_Biological_Process_2021	positive regulation of B cell proliferation	3/30	0.219273	0.956808	0	0	1.94723	2.95479	CD40;CD38;TNFRSF13C	0.1	0.659014
GO_Biological_Process_2021	negative regulation of blood vessel endothelial cell proliferation involved in sprouting angiogenesis	1/6	0.15173	0.57705	0	0	7.20519	13.5865	NGFR	0.166667	0.818929			KEGG_2021_Human	Viral myocarditis	5/60	0.222972	0.999994	0	0	1.59378	2.3918	CD40;CCND1;LAMA1;PRF1;DMD	0.0833333	0.651749
Reactome_2016	Fructose metabolism	1/6	0.15173	0.940667	0	0	7.20519	13.5865	ALDOB	0.166667	0.818929			GO_Biological_Process_2021	neural crest cell development	4/45	0.22446	0.956808	0	0	1.71008	2.55496	SEMA5A;SEMA6A;SEMA3C;SEMA6D	0.0888889	0.648862
Reactome_2016	Activation of TRKA receptors	1/6	0.15173	0.940667	0	0	7.20519	13.5865	ADCYAP1R1	0.166667	0.818929			Reactome_2016	G-protein mediated events	4/45	0.22446	0.999996	0	0	1.71008	2.55496	PDE1C;PRKAR2B;ADCY4;ITPR2	0.0888889	0.648862
Reactome_2016	NADE modulates death signalling	1/6	0.15173	0.940667	0	0	7.20519	13.5865	NGFR	0.166667	0.818929			GO_Biological_Process_2021	transcription initiation from RNA polymerase II promoter	10/140	0.225991	0.956808	0	0	1.34949	2.00705	NOTCH2;YAP1;NOTCH3;WWTR1;NR5A2;NR6A1;ESRRG;NR1D1;TEAD2;NR3C2	0.0714286	0.645908
Reactome_2016	p75NTR negatively regulates cell cycle via SC1	1/6	0.15173	0.940667	0	0	7.20519	13.5865	NGFR	0.166667	0.818929			GO_Biological_Process_2021	cell morphogenesis involved in neuron differentiation	6/76	0.22757	0.956808	0	0	1.50291	2.22475	NTNG1;BTBD3;SLITRK5;DCDC2;CNTN4;FGFR2	0.0789474	0.642885
Reactome_2016	SMAD2/3 Phosphorylation Motif Mutants in Cancer	1/6	0.15173	0.940667	0	0	7.20519	13.5865	TGFB1	0.166667	0.818929			GO_Biological_Process_2021	actomyosin structure organization	6/76	0.22757	0.956808	0	0	1.50291	2.22475	EPB41L4A;ACTC1;CSRP1;EPB41;MYH14;ARRB1	0.0789474	0.642885
Reactome_2016	Synthesis of Lipoxins (LX)	1/6	0.15173	0.940667	0	0	7.20519	13.5865	HPGD	0.166667	0.818929			GO_Biological_Process_2021	cellular response to fibroblast growth factor stimulus	7/92	0.229206	0.956808	0	0	1.44417	2.12745	TRIM71;ZFP36;EGR3;ESRP1;FGFR2;FGF21;FGFR1	0.076087	0.639774
GO_Biological_Process_2021	positive regulation of tau-protein kinase activity	1/6	0.15173	0.57705	0	0	7.20519	13.5865	NAB2	0.166667	0.818929			KEGG_2021_Human	Arachidonic acid metabolism	5/61	0.232997	0.999994	0	0	1.56524	2.28013	TBXAS1;GPX8;PTGDS;ALOX15B;PTGS1	0.0819672	0.63265
Reactome_2016	Assembly of the ORC complex at the origin of replication	1/6	0.15173	0.940667	0	0	7.20519	13.5865	ORC1	0.166667	0.818929			Reactome_2016	Constitutive Signaling by Aberrant PI3K in Cancer	5/61	0.232997	0.999996	0	0	1.56524	2.28013	KIT;GAB1;FGFR2;HBEGF;FGFR1	0.0819672	0.63265
KEGG_2021_Human	Phenylalanine, tyrosine and tryptophan biosynthesis	1/6	0.15173	0.928438	0	0	7.20519	13.5865	PAH	0.166667	0.818929			GO_Biological_Process_2021	embryo development ending in birth or egg hatching	2/17	0.233458	0.956808	0	0	2.33599	3.39829	NR5A2;FGFR1	0.117647	0.631791
GO_Biological_Process_2021	pronephros development	1/6	0.15173	0.57705	0	0	7.20519	13.5865	OSR1	0.166667	0.818929			GO_Biological_Process_2021	activation of protein kinase A activity	2/17	0.233458	0.956808	0	0	2.33599	3.39829	PRKAR2B;ADCY4	0.117647	0.631791
GO_Biological_Process_2021	proline transport	1/6	0.15173	0.57705	0	0	7.20519	13.5865	SLC6A17	0.166667	0.818929			GO_Biological_Process_2021	pulmonary valve morphogenesis	2/17	0.233458	0.956808	0	0	2.33599	3.39829	NOTCH2;SLIT2	0.117647	0.631791
GO_Biological_Process_2021	presynaptic active zone organization	1/6	0.15173	0.57705	0	0	7.20519	13.5865	ERC2	0.166667	0.818929			GO_Biological_Process_2021	aorta morphogenesis	2/17	0.233458	0.956808	0	0	2.33599	3.39829	EFEMP2;ENG	0.117647	0.631791
GO_Biological_Process_2021	prepulse inhibition	1/6	0.15173	0.57705	0	0	7.20519	13.5865	GRID2	0.166667	0.818929			GO_Biological_Process_2021	regulation of cellular respiration	2/17	0.233458	0.956808	0	0	2.33599	3.39829	PRDM16;IFNLR1	0.117647	0.631791
GO_Biological_Process_2021	negative regulation of cardiac muscle cell apoptotic process	1/6	0.15173	0.57705	0	0	7.20519	13.5865	GATA4	0.166667	0.818929			GO_Biological_Process_2021	regulation of cellular response to growth factor stimulus	2/17	0.233458	0.956808	0	0	2.33599	3.39829	SLIT2;FSTL1	0.117647	0.631791
GO_Biological_Process_2021	lipoxin metabolic process	1/6	0.15173	0.57705	0	0	7.20519	13.5865	HPGD	0.166667	0.818929			GO_Biological_Process_2021	cell surface receptor signaling pathway involved in heart development	2/17	0.233458	0.956808	0	0	2.33599	3.39829	NOTCH2;BMP2	0.117647	0.631791
GO_Biological_Process_2021	negative regulation of amyloid precursor protein biosynthetic process	1/6	0.15173	0.57705	0	0	7.20519	13.5865	ITM2A	0.166667	0.818929			GO_Biological_Process_2021	regulation of metal ion transport	2/17	0.233458	0.956808	0	0	2.33599	3.39829	CASR;EPB41	0.117647	0.631791
GO_Biological_Process_2021	erythrose 4-phosphate/phosphoenolpyruvate family amino acid metabolic process	1/6	0.15173	0.57705	0	0	7.20519	13.5865	PAH	0.166667	0.818929			GO_Biological_Process_2021	regulation of osteoblast proliferation	2/17	0.233458	0.956808	0	0	2.33599	3.39829	BMP2;FGFR2	0.117647	0.631791
GO_Biological_Process_2021	equilibrioception	1/6	0.15173	0.57705	0	0	7.20519	13.5865	CLRN1	0.166667	0.818929			Reactome_2016	RHO GTPases Activate ROCKs	2/17	0.233458	0.999996	0	0	2.33599	3.39829	MYH14;MYL9	0.117647	0.631791
GO_Biological_Process_2021	embryonic hindlimb morphogenesis	1/6	0.15173	0.57705	0	0	7.20519	13.5865	OSR1	0.166667	0.818929			GO_Biological_Process_2021	gliogenesis	2/17	0.233458	0.956808	0	0	2.33599	3.39829	NFIB;CD9	0.117647	0.631791
GO_Biological_Process_2021	embryonic camera-type eye morphogenesis	1/6	0.15173	0.57705	0	0	7.20519	13.5865	TH	0.166667	0.818929			Reactome_2016	Ligand-dependent caspase activation	2/17	0.233458	0.999996	0	0	2.33599	3.39829	LY96;TLR3	0.117647	0.631791
GO_Biological_Process_2021	embryonic camera-type eye development	1/6	0.15173	0.57705	0	0	7.20519	13.5865	TH	0.166667	0.818929			GO_Biological_Process_2021	positive regulation of heart rate	2/17	0.233458	0.956808	0	0	2.33599	3.39829	KCNQ1;TRPM4	0.117647	0.631791
GO_Biological_Process_2021	regulation of peptidyl-cysteine S-nitrosylation	1/6	0.15173	0.57705	0	0	7.20519	13.5865	NOS1AP	0.166667	0.818929			GO_Biological_Process_2021	mesonephric tubule development	2/17	0.233458	0.956808	0	0	2.33599	3.39829	SLIT2;FGFR2	0.117647	0.631791
GO_Biological_Process_2021	regulation of nitric oxide mediated signal transduction	1/6	0.15173	0.57705	0	0	7.20519	13.5865	NOS1AP	0.166667	0.818929			Reactome_2016	PKA activation in glucagon signalling	2/17	0.233458	0.999996	0	0	2.33599	3.39829	PRKAR2B;ADCY4	0.117647	0.631791
GO_Biological_Process_2021	regulation of macrophage apoptotic process	1/6	0.15173	0.57705	0	0	7.20519	13.5865	IRF7	0.166667	0.818929			Reactome_2016	PKA-mediated phosphorylation of CREB	2/17	0.233458	0.999996	0	0	2.33599	3.39829	PRKAR2B;ADCY4	0.117647	0.631791
GO_Biological_Process_2021	contact inhibition	1/6	0.15173	0.57705	0	0	7.20519	13.5865	CDHR2	0.166667	0.818929			GO_Biological_Process_2021	aminoglycan catabolic process	3/31	0.233774	0.956808	0	0	1.87758	2.72888	SDC3;GPC2;GPC4	0.0967742	0.631203
GO_Biological_Process_2021	cobalamin transport	1/6	0.15173	0.57705	0	0	7.20519	13.5865	AMN	0.166667	0.818929			GO_Biological_Process_2021	MyD88-independent toll-like receptor signaling pathway	3/31	0.233774	0.956808	0	0	1.87758	2.72888	CD40;LY96;TLR3	0.0967742	0.631203
GO_Biological_Process_2021	cerebral cortex cell migration	1/6	0.15173	0.57705	0	0	7.20519	13.5865	FGF13	0.166667	0.818929			GO_Biological_Process_2021	prostaglandin metabolic process	3/31	0.233774	0.956808	0	0	1.87758	2.72888	TBXAS1;PTGDS;PTGS1	0.0967742	0.631203
GO_Biological_Process_2021	cellular water homeostasis	1/6	0.15173	0.57705	0	0	7.20519	13.5865	SCT	0.166667	0.818929			Reactome_2016	Adherens junctions interactions	3/31	0.233774	0.999996	0	0	1.87758	2.72888	JUP;CDH1;CDH12	0.0967742	0.631203
GO_Biological_Process_2021	regulation of hyaluronan biosynthetic process	1/6	0.15173	0.57705	0	0	7.20519	13.5865	TGFB1	0.166667	0.818929			GO_Biological_Process_2021	regulation of cellular protein localization	4/46	0.236207	0.956808	0	0	1.66928	2.40884	TRIM46;GPC2;GPC4;LCP1	0.0869565	0.626708
GO_Biological_Process_2021	regulation of glomerular filtration	1/6	0.15173	0.57705	0	0	7.20519	13.5865	GAS6	0.166667	0.818929			GO_Biological_Process_2021	positive regulation of organelle assembly	4/46	0.236207	0.956808	0	0	1.66928	2.40884	GPSM2;FSCN1;CAPG;LCP1	0.0869565	0.626708
GO_Biological_Process_2021	regulation of excitatory synapse assembly	1/6	0.15173	0.57705	0	0	7.20519	13.5865	VSTM5	0.166667	0.818929			Reactome_2016	Phospholipase C-mediated cascade; FGFR4	4/46	0.236207	0.999996	0	0	1.66928	2.40884	PDE1C;PRKAR2B;ADCY4;ITPR2	0.0869565	0.626708
GO_Biological_Process_2021	regulation of epinephrine secretion	1/6	0.15173	0.57705	0	0	7.20519	13.5865	ADRA2A	0.166667	0.818929			GO_Biological_Process_2021	negative regulation of developmental process	6/77	0.236492	0.956808	0	0	1.48166	2.13632	BMP2;GRIN3A;BCL11A;NFIB;SOX9;NKX3-1	0.0779221	0.626183
GO_Biological_Process_2021	regulation of digestive system process	1/6	0.15173	0.57705	0	0	7.20519	13.5865	OPRK1	0.166667	0.818929			KEGG_2021_Human	GnRH signaling pathway	7/93	0.237295	0.999994	0	0	1.4273	2.0531	MMP14;MMP2;ADCY4;ITPR2;PLD1;HBEGF;MAP2K6	0.0752688	0.624711
GO_Biological_Process_2021	cardiac ventricle formation	1/6	0.15173	0.57705	0	0	7.20519	13.5865	SOX11	0.166667	0.818929			KEGG_2021_Human	Transcriptional misregulation in cancer	13/192	0.240027	0.999994	0	0	1.27435	1.8185	CD40;CEBPB;BCL11B;JUP;TMPRSS2;ETV1;LYL1;MEIS1;CCND2;DDIT3;FEV;NUPR1;FCGR1A	0.0677083	0.619741
GO_Biological_Process_2021	regulation of cellular response to hypoxia	1/6	0.15173	0.57705	0	0	7.20519	13.5865	DDAH1	0.166667	0.818929			GO_Biological_Process_2021	synapse organization	9/126	0.241755	0.956808	0	0	1.34917	1.91559	NTNG1;NLGN3;PPFIBP2;CDH1;SPOCK2;SNCG;GPC4;PDZRN3;CBLN1	0.0714286	0.616625
GO_Biological_Process_2021	B cell chemotaxis	1/6	0.15173	0.57705	0	0	7.20519	13.5865	GAS6	0.166667	0.818929			GO_Biological_Process_2021	heparin metabolic process	1/5	0.242594	0.956808	0	0	4.37847	6.20152	ANGPT1	0.2	0.61512
GO_Biological_Process_2021	regulation of blood vessel remodeling	1/6	0.15173	0.57705	0	0	7.20519	13.5865	TGFB1	0.166667	0.818929			GO_Biological_Process_2021	membrane repolarization during atrial cardiac muscle cell action potential	1/5	0.242594	0.956808	0	0	4.37847	6.20152	KCNQ1	0.2	0.61512
GO_Biological_Process_2021	aspartate metabolic process	1/6	0.15173	0.57705	0	0	7.20519	13.5865	ASS1	0.166667	0.818929			GO_Biological_Process_2021	hematopoietic stem cell migration	1/5	0.242594	0.956808	0	0	4.37847	6.20152	BCL11B	0.2	0.61512
GO_Biological_Process_2021	proton-transporting V-type ATPase complex assembly	1/6	0.15173	0.57705	0	0	7.20519	13.5865	ALDOB	0.166667	0.818929			GO_Biological_Process_2021	negative regulation of PERK-mediated unfolded protein response	1/5	0.242594	0.956808	0	0	4.37847	6.20152	PPP1R15A	0.2	0.61512
GO_Biological_Process_2021	activation of transmembrane receptor protein tyrosine kinase activity	1/6	0.15173	0.57705	0	0	7.20519	13.5865	NRG1	0.166667	0.818929			GO_Biological_Process_2021	negative regulation of macrophage cytokine production	1/5	0.242594	0.956808	0	0	4.37847	6.20152	IRAK3	0.2	0.61512
GO_Biological_Process_2021	ventricular compact myocardium morphogenesis	1/6	0.15173	0.57705	0	0	7.20519	13.5865	TGFBR3	0.166667	0.818929			GO_Biological_Process_2021	negative regulation of keratinocyte differentiation	1/5	0.242594	0.956808	0	0	4.37847	6.20152	GRHL2	0.2	0.61512
GO_Biological_Process_2021	regulation of relaxation of cardiac muscle	1/6	0.15173	0.57705	0	0	7.20519	13.5865	PDE4B	0.166667	0.818929			GO_Biological_Process_2021	negative regulation of CREB transcription factor activity	1/5	0.242594	0.956808	0	0	4.37847	6.20152	DDIT3	0.2	0.61512
GO_Biological_Process_2021	regulation of T-helper 17 cell lineage commitment	1/6	0.15173	0.57705	0	0	7.20519	13.5865	LOXL3	0.166667	0.818929			GO_Biological_Process_2021	negative regulation of cardiac muscle cell proliferation	1/5	0.242594	0.956808	0	0	4.37847	6.20152	RBP4	0.2	0.61512
GO_Biological_Process_2021	retinal ganglion cell axon guidance	1/6	0.15173	0.57705	0	0	7.20519	13.5865	EPHB1	0.166667	0.818929			GO_Biological_Process_2021	xylulose 5-phosphate biosynthetic process	1/5	0.242594	0.956808	0	0	4.37847	6.20152	DCXR	0.2	0.61512
GO_Biological_Process_2021	response to gonadotropin	1/6	0.15173	0.57705	0	0	7.20519	13.5865	TGFBR3	0.166667	0.818929			GO_Biological_Process_2021	monocyte extravasation	1/5	0.242594	0.956808	0	0	4.37847	6.20152	JAML	0.2	0.61512
GO_Biological_Process_2021	regulation of type B pancreatic cell proliferation	1/6	0.15173	0.57705	0	0	7.20519	13.5865	PTPRN	0.166667	0.818929			GO_Biological_Process_2021	vitamin D3 metabolic process	1/5	0.242594	0.956808	0	0	4.37847	6.20152	CYP27A1	0.2	0.61512
GO_Biological_Process_2021	glomerulus vasculature development	1/6	0.15173	0.57705	0	0	7.20519	13.5865	OSR1	0.166667	0.818929			GO_Biological_Process_2021	metanephric nephron tubule morphogenesis	1/5	0.242594	0.956808	0	0	4.37847	6.20152	SOX9	0.2	0.61512
GO_Biological_Process_2021	regulation of transmission of nerve impulse	1/6	0.15173	0.57705	0	0	7.20519	13.5865	GLRA1	0.166667	0.818929			GO_Biological_Process_2021	transsulfuration	1/5	0.242594	0.956808	0	0	4.37847	6.20152	TST	0.2	0.61512
GO_Biological_Process_2021	regulation of T-helper cell differentiation	1/6	0.15173	0.57705	0	0	7.20519	13.5865	MYB	0.166667	0.818929			GO_Biological_Process_2021	membrane repolarization during ventricular cardiac muscle cell action potential	1/5	0.242594	0.956808	0	0	4.37847	6.20152	KCNQ1	0.2	0.61512
GO_Biological_Process_2021	inner ear auditory receptor cell differentiation	1/6	0.15173	0.57705	0	0	7.20519	13.5865	JAG2	0.166667	0.818929			Reactome_2016	Sperm:Oocyte Membrane Binding	1/5	0.242594	0.999996	0	0	4.37847	6.20152	CD9	0.2	0.61512
GO_Biological_Process_2021	foam cell differentiation	1/6	0.15173	0.57705	0	0	7.20519	13.5865	TGFB1	0.166667	0.818929			GO_Biological_Process_2021	toll-like receptor 2 signaling pathway	1/5	0.242594	0.956808	0	0	4.37847	6.20152	PIK3AP1	0.2	0.61512
GO_Biological_Process_2021	sialylation	1/6	0.15173	0.57705	0	0	7.20519	13.5865	ST8SIA3	0.166667	0.818929			GO_Biological_Process_2021	membrane depolarization during AV node cell action potential	1/5	0.242594	0.956808	0	0	4.37847	6.20152	TRPM4	0.2	0.61512
GO_Biological_Process_2021	L-ornithine transmembrane transport	1/6	0.15173	0.57705	0	0	7.20519	13.5865	SLC25A15	0.166667	0.818929			GO_Biological_Process_2021	medium-chain fatty acid catabolic process	1/5	0.242594	0.956808	0	0	4.37847	6.20152	GLYATL2	0.2	0.61512
GO_Biological_Process_2021	leucine transport	1/6	0.15173	0.57705	0	0	7.20519	13.5865	SLC6A17	0.166667	0.818929			GO_Biological_Process_2021	long-chain fatty acid catabolic process	1/5	0.242594	0.956808	0	0	4.37847	6.20152	GLYATL2	0.2	0.61512
GO_Biological_Process_2021	regulation of SNARE complex assembly	1/6	0.15173	0.57705	0	0	7.20519	13.5865	SNCA	0.166667	0.818929			GO_Biological_Process_2021	Schwann cell differentiation	1/5	0.242594	0.956808	0	0	4.37847	6.20152	EGR2	0.2	0.61512
GO_Biological_Process_2021	macromolecule biosynthetic process	1/6	0.15173	0.57705	0	0	7.20519	13.5865	COL5A1	0.166667	0.818929			GO_Biological_Process_2021	salivary gland development	1/5	0.242594	0.956808	0	0	4.37847	6.20152	NKX3-1	0.2	0.61512
GO_Biological_Process_2021	macrophage derived foam cell differentiation	1/6	0.15173	0.57705	0	0	7.20519	13.5865	TGFB1	0.166667	0.818929			GO_Biological_Process_2021	rRNA transport	1/5	0.242594	0.956808	0	0	4.37847	6.20152	TST	0.2	0.61512
GO_Biological_Process_2021	telencephalon cell migration	1/6	0.15173	0.57705	0	0	7.20519	13.5865	FGF13	0.166667	0.818929			GO_Biological_Process_2021	Roundabout signaling pathway	1/5	0.242594	0.956808	0	0	4.37847	6.20152	SLIT2	0.2	0.61512
GO_Biological_Process_2021	regulation of resting membrane potential	1/6	0.15173	0.57705	0	0	7.20519	13.5865	KCNJ2	0.166667	0.818929			GO_Biological_Process_2021	RNA import into mitochondrion	1/5	0.242594	0.956808	0	0	4.37847	6.20152	TST	0.2	0.61512
GO_Biological_Process_2021	mesenchymal cell differentiation involved in kidney development	1/6	0.15173	0.57705	0	0	7.20519	13.5865	OSR1	0.166667	0.818929			GO_Biological_Process_2021	indole-containing compound biosynthetic process	1/5	0.242594	0.956808	0	0	4.37847	6.20152	ASMT	0.2	0.61512
GO_Biological_Process_2021	trigeminal nerve development	1/6	0.15173	0.57705	0	0	7.20519	13.5865	NEUROG1	0.166667	0.818929			GO_Biological_Process_2021	indolalkylamine biosynthetic process	1/5	0.242594	0.956808	0	0	4.37847	6.20152	ASMT	0.2	0.61512
GO_Biological_Process_2021	histone H4-K12 acetylation	1/6	0.15173	0.57705	0	0	7.20519	13.5865	JADE2	0.166667	0.818929			GO_Biological_Process_2021	immature B cell differentiation	1/5	0.242594	0.956808	0	0	4.37847	6.20152	KIT	0.2	0.61512
KEGG_2021_Human	Vascular smooth muscle contraction	6/133	0.152232	0.928438	0	0	1.70715	3.21344	PRKCG;GUCY1A2;PLA2G12B;PRKCB;AVP;PRKG1	0.0451128	0.817493			GO_Biological_Process_2021	homoserine metabolic process	1/5	0.242594	0.956808	0	0	4.37847	6.20152	TST	0.2	0.61512
GO_Biological_Process_2021	regulation of biomineral tissue development	2/26	0.155421	0.57705	0	0	3.00479	5.59377	TGFB1;GAS6	0.0769231	0.808489			GO_Biological_Process_2021	negative regulation of pinocytosis	1/5	0.242594	0.956808	0	0	4.37847	6.20152	PROM2	0.2	0.61512
GO_Biological_Process_2021	cellular response to drug	2/26	0.155421	0.57705	0	0	3.00479	5.59377	PDE4B;GAS6	0.0769231	0.808489			GO_Biological_Process_2021	negative regulation of protein acetylation	1/5	0.242594	0.956808	0	0	4.37847	6.20152	KLF15	0.2	0.61512
GO_Biological_Process_2021	glial cell development	2/26	0.155421	0.57705	0	0	3.00479	5.59377	PRDM8;SOX11	0.0769231	0.808489			GO_Biological_Process_2021	negative regulation of RNA polymerase II regulatory region sequence-specific DNA binding	1/5	0.242594	0.956808	0	0	4.37847	6.20152	DDIT3	0.2	0.61512
KEGG_2021_Human	Folate biosynthesis	2/26	0.155421	0.928438	0	0	3.00479	5.59377	TH;PAH	0.0769231	0.808489			GO_Biological_Process_2021	positive regulation of leukocyte mediated immunity	1/5	0.242594	0.956808	0	0	4.37847	6.20152	KIT	0.2	0.61512
GO_Biological_Process_2021	positive regulation of cellular metabolic process	5/105	0.155605	0.57705	0	0	1.80588	3.35972	CDKN1A;PID1;TGFB1;BVES;SNCA	0.047619	0.807976			Reactome_2016	Sulfide oxidation to sulfate	1/5	0.242594	0.999996	0	0	4.37847	6.20152	TST	0.2	0.61512
GO_Biological_Process_2021	negative regulation of transport	3/51	0.159311	0.57705	0	0	2.255	4.14219	NRG1;EPHA3;SNCA	0.0588235	0.797754			Reactome_2016	Free fatty acid receptors	1/5	0.242594	0.999996	0	0	4.37847	6.20152	FFAR4	0.2	0.61512
GO_Biological_Process_2021	regulation of axonogenesis	3/51	0.159311	0.57705	0	0	2.255	4.14219	NGFR;SLITRK1;PLXNA4	0.0588235	0.797754			Reactome_2016	Negative regulation of TCF-dependent signaling by DVL-interacting proteins	1/5	0.242594	0.999996	0	0	4.37847	6.20152	CCDC88C	0.2	0.61512
GO_Biological_Process_2021	blood circulation	3/51	0.159311	0.57705	0	0	2.255	4.14219	CXCL12;HOXB2;SGCZ	0.0588235	0.797754			Reactome_2016	Catabolism of glucuronate to xylulose-5-phosphate	1/5	0.242594	0.999996	0	0	4.37847	6.20152	DCXR	0.2	0.61512
GO_Biological_Process_2021	regulation of substrate adhesion-dependent cell spreading	3/51	0.159311	0.57705	0	0	2.255	4.14219	KANK1;SPRY4;FLNA	0.0588235	0.797754			GO_Biological_Process_2021	protein localization to microtubule plus-end	1/5	0.242594	0.956808	0	0	4.37847	6.20152	GAS2L2	0.2	0.61512
Reactome_2016	Cardiac conduction	6/135	0.159802	0.940667	0	0	1.6805	3.08175	KCNK9;KCND2;GATA4;FGF13;KCNJ2;SLC8A2	0.0444444	0.796419			GO_Biological_Process_2021	protein localization to microtubule end	1/5	0.242594	0.956808	0	0	4.37847	6.20152	GAS2L2	0.2	0.61512
KEGG_2021_Human	Parathyroid hormone synthesis, secretion and action	5/106	0.159945	0.930964	0	0	1.7879	3.27709	PRKCG;CDKN1A;CREB3L3;PRKCB;PDE4B	0.0471698	0.796028			GO_Biological_Process_2021	positive thymic T cell selection	1/5	0.242594	0.956808	0	0	4.37847	6.20152	ZAP70	0.2	0.61512
Reactome_2016	Muscle contraction	8/196	0.163008	0.940667	0	0	1.53854	2.79084	DES;KCND2;KCNK9;GATA4;VIM;FGF13;KCNJ2;SLC8A2	0.0408163	0.78779			GO_Biological_Process_2021	positive regulation of protein kinase C activity	1/5	0.242594	0.956808	0	0	4.37847	6.20152	TCIM	0.2	0.61512
GO_Biological_Process_2021	regulation of transcription regulatory region DNA binding	2/27	0.165009	0.57705	0	0	2.88445	5.19708	TGFB1;SOX11	0.0740741	0.782493			GO_Biological_Process_2021	positive regulation of necrotic cell death	1/5	0.242594	0.956808	0	0	4.37847	6.20152	MT3	0.2	0.61512
GO_Biological_Process_2021	regulation of vascular endothelial growth factor production	2/27	0.165009	0.57705	0	0	2.88445	5.19708	TGFB1;GATA4	0.0740741	0.782493			GO_Biological_Process_2021	positive regulation of membrane permeability	1/5	0.242594	0.956808	0	0	4.37847	6.20152	MT3	0.2	0.61512
GO_Biological_Process_2021	modulation of excitatory postsynaptic potential	2/27	0.165009	0.57705	0	0	2.88445	5.19708	NLGN1;SLC8A2	0.0740741	0.782493			GO_Biological_Process_2021	positive regulation of long-term synaptic depression	1/5	0.242594	0.956808	0	0	4.37847	6.20152	CBLN1	0.2	0.61512
GO_Biological_Process_2021	positive regulation of BMP signaling pathway	2/27	0.165009	0.57705	0	0	2.88445	5.19708	SOX11;ZNF423	0.0740741	0.782493			GO_Biological_Process_2021	positive regulation of epithelial to mesenchymal transition involved in endocardial cushion formation	1/5	0.242594	0.956808	0	0	4.37847	6.20152	ENG	0.2	0.61512
GO_Biological_Process_2021	positive regulation of calcium ion transmembrane transport	2/27	0.165009	0.57705	0	0	2.88445	5.19708	CEMIP;SNCA	0.0740741	0.782493			GO_Biological_Process_2021	negative regulation of synapse organization	1/5	0.242594	0.956808	0	0	4.37847	6.20152	SLIT1	0.2	0.61512
GO_Biological_Process_2021	positive regulation of striated muscle cell differentiation	2/27	0.165009	0.57705	0	0	2.88445	5.19708	TGFB1;NRG1	0.0740741	0.782493			GO_Biological_Process_2021	positive regulation of dendritic cell differentiation	1/5	0.242594	0.956808	0	0	4.37847	6.20152	LGALS3	0.2	0.61512
GO_Biological_Process_2021	dendritic spine organization	2/27	0.165009	0.57705	0	0	2.88445	5.19708	DOCK10;EPHB1	0.0740741	0.782493			GO_Biological_Process_2021	positive regulation of cardiac muscle contraction	1/5	0.242594	0.956808	0	0	4.37847	6.20152	KCNQ1	0.2	0.61512
GO_Biological_Process_2021	regulation of cardiac muscle cell contraction	2/27	0.165009	0.57705	0	0	2.88445	5.19708	PDE4B;FGF13	0.0740741	0.782493			GO_Biological_Process_2021	positive regulation of cAMP-dependent protein kinase activity	1/5	0.242594	0.956808	0	0	4.37847	6.20152	ATP2B4	0.2	0.61512
GO_Biological_Process_2021	negative regulation of protein polymerization	2/27	0.165009	0.57705	0	0	2.88445	5.19708	KANK1;SNCA	0.0740741	0.782493			GO_Biological_Process_2021	positive regulation of axon extension involved in axon guidance	1/5	0.242594	0.956808	0	0	4.37847	6.20152	SEMA5A	0.2	0.61512
GO_Biological_Process_2021	cilium movement	3/52	0.165897	0.57705	0	0	2.20886	3.96798	RSPH4A;TEKT3;DNAAF6	0.0576923	0.780163			GO_Biological_Process_2021	positive regulation of action potential	1/5	0.242594	0.956808	0	0	4.37847	6.20152	TRPM4	0.2	0.61512
GO_Biological_Process_2021	negative regulation of protein-containing complex assembly	3/52	0.165897	0.57705	0	0	2.20886	3.96798	PTGER4;LDLRAD4;DACT1	0.0576923	0.780163			GO_Biological_Process_2021	peripheral nervous system neuron differentiation	1/5	0.242594	0.956808	0	0	4.37847	6.20152	ETV1	0.2	0.61512
GO_Biological_Process_2021	negative regulation of protein metabolic process	3/52	0.165897	0.57705	0	0	2.20886	3.96798	PRKCG;ADGRB1;FLNA	0.0576923	0.780163			GO_Biological_Process_2021	p38MAPK cascade	1/5	0.242594	0.956808	0	0	4.37847	6.20152	ZFP36	0.2	0.61512
GO_Biological_Process_2021	myeloid cell differentiation	3/52	0.165897	0.57705	0	0	2.20886	3.96798	CEBPA;CDKN2B;ZBTB16	0.0576923	0.780163			GO_Biological_Process_2021	ornithine transport	1/5	0.242594	0.956808	0	0	4.37847	6.20152	SLC25A29	0.2	0.61512
GO_Biological_Process_2021	regulation of release of sequestered calcium ion into cytosol	3/52	0.165897	0.57705	0	0	2.20886	3.96798	JPH4;CEMIP;SNCA	0.0576923	0.780163			GO_Biological_Process_2021	non-canonical Wnt signaling pathway via MAPK cascade	1/5	0.242594	0.956808	0	0	4.37847	6.20152	FZD7	0.2	0.61512
KEGG_2021_Human	cGMP-PKG signaling pathway	7/167	0.167717	0.951794	0	0	1.58114	2.8231	GUCY1A2;CREB3L3;PRKG2;GATA4;PRKG1;ADRA2A;SLC8A2	0.0419162	0.775423			GO_Biological_Process_2021	nephron tubule formation	1/5	0.242594	0.956808	0	0	4.37847	6.20152	SOX9	0.2	0.61512
GO_Biological_Process_2021	negative regulation of transmembrane receptor protein serine/threonine kinase signaling pathway	5/108	0.168771	0.57705	0	0	1.75301	3.11897	TGFB1;PEG10;FST;SMAD9;LDLRAD4	0.0462963	0.772702			GO_Biological_Process_2021	negative regulation of transforming growth factor beta1 production	1/5	0.242594	0.956808	0	0	4.37847	6.20152	GATA6	0.2	0.61512
GO_Biological_Process_2021	negative regulation of cell cycle	4/80	0.171025	0.57705	0	0	1.89974	3.35483	CEBPA;BRINP1;TGFB1;HPGD	0.05	0.766941			Reactome_2016	Galactose catabolism	1/5	0.242594	0.999996	0	0	4.37847	6.20152	GALK1	0.2	0.61512
GO_Biological_Process_2021	regulation of protein localization to plasma membrane	4/80	0.171025	0.57705	0	0	1.89974	3.35483	DAB2;PID1;TGFB1;EPHA3	0.05	0.766941			GO_Biological_Process_2021	pyridine-containing compound metabolic process	1/5	0.242594	0.956808	0	0	4.37847	6.20152	AOX1	0.2	0.61512
GO_Biological_Process_2021	regulation of fat cell differentiation	4/80	0.171025	0.57705	0	0	1.89974	3.35483	TGFB1;ZBTB16;ID2;ZFPM2	0.05	0.766941			GO_Biological_Process_2021	response to cGMP	1/5	0.242594	0.956808	0	0	4.37847	6.20152	PDE3A	0.2	0.61512
GO_Biological_Process_2021	positive regulation of phagocytosis	3/53	0.172561	0.57705	0	0	2.16457	3.80317	TUB;RAB31;GAS6	0.0566038	0.763058			GO_Biological_Process_2021	chemokine (C-X-C motif) ligand 12 signaling pathway	1/5	0.242594	0.956808	0	0	4.37847	6.20152	CXCR4	0.2	0.61512
GO_Biological_Process_2021	heart morphogenesis	3/53	0.172561	0.57705	0	0	2.16457	3.80317	TGFBR3;HEYL;TH	0.0566038	0.763058			GO_Biological_Process_2021	centriole assembly	1/5	0.242594	0.956808	0	0	4.37847	6.20152	MCIDAS	0.2	0.61512
GO_Biological_Process_2021	cardiac muscle tissue development	3/53	0.172561	0.57705	0	0	2.16457	3.80317	NRG1;GATA4;SGCZ	0.0566038	0.763058			GO_Biological_Process_2021	cellular response to vitamin D	1/5	0.242594	0.956808	0	0	4.37847	6.20152	FES	0.2	0.61512
KEGG_2021_Human	Endocrine and other factor-regulated calcium reabsorption	3/53	0.172561	0.955397	0	0	2.16457	3.80317	PRKCG;PRKCB;SLC8A2	0.0566038	0.763058			GO_Biological_Process_2021	cellular response to vitamin	1/5	0.242594	0.956808	0	0	4.37847	6.20152	FES	0.2	0.61512
GO_Biological_Process_2021	parallel actin filament bundle assembly	1/7	0.174682	0.57705	0	0	6.00401	10.4757	ESPN	0.142857	0.757751			GO_Biological_Process_2021	regulation of hormone metabolic process	1/5	0.242594	0.956808	0	0	4.37847	6.20152	TCF7L2	0.2	0.61512
GO_Biological_Process_2021	long-term synaptic depression	1/7	0.174682	0.57705	0	0	6.00401	10.4757	PLK2	0.142857	0.757751			GO_Biological_Process_2021	regulation of guanylate cyclase activity	1/5	0.242594	0.956808	0	0	4.37847	6.20152	GUCA1A	0.2	0.61512
GO_Biological_Process_2021	vitamin A metabolic process	1/7	0.174682	0.57705	0	0	6.00401	10.4757	BCO1	0.142857	0.757751			GO_Biological_Process_2021	regulation of growth rate	1/5	0.242594	0.956808	0	0	4.37847	6.20152	NOTCH2	0.2	0.61512
GO_Biological_Process_2021	ureter development	1/7	0.174682	0.57705	0	0	6.00401	10.4757	OSR1	0.142857	0.757751			GO_Biological_Process_2021	cellular response to erythropoietin	1/5	0.242594	0.956808	0	0	4.37847	6.20152	KIT	0.2	0.61512
GO_Biological_Process_2021	type B pancreatic cell development	1/7	0.174682	0.57705	0	0	6.00401	10.4757	BMP6	0.142857	0.757751			GO_Biological_Process_2021	cellular response to cGMP	1/5	0.242594	0.956808	0	0	4.37847	6.20152	PDE3A	0.2	0.61512
GO_Biological_Process_2021	miRNA catabolic process	1/7	0.174682	0.57705	0	0	6.00401	10.4757	LIN28B	0.142857	0.757751			GO_Biological_Process_2021	regulation of dendritic cell cytokine production	1/5	0.242594	0.956808	0	0	4.37847	6.20152	KIT	0.2	0.61512
GO_Biological_Process_2021	metanephric nephron tubule development	1/7	0.174682	0.57705	0	0	6.00401	10.4757	OSR1	0.142857	0.757751			GO_Biological_Process_2021	carnitine biosynthetic process	1/5	0.242594	0.956808	0	0	4.37847	6.20152	SHMT1	0.2	0.61512
GO_Biological_Process_2021	tachykinin receptor signaling pathway	1/7	0.174682	0.57705	0	0	6.00401	10.4757	TAC1	0.142857	0.757751			GO_Biological_Process_2021	regulation of chloride transport	1/5	0.242594	0.956808	0	0	4.37847	6.20152	ATP8B1	0.2	0.61512
GO_Biological_Process_2021	marginal zone B cell differentiation	1/7	0.174682	0.57705	0	0	6.00401	10.4757	DOCK10	0.142857	0.757751			GO_Biological_Process_2021	cannabinoid signaling pathway	1/5	0.242594	0.956808	0	0	4.37847	6.20152	ALOX15B	0.2	0.61512
GO_Biological_Process_2021	maintenance of synapse structure	1/7	0.174682	0.57705	0	0	6.00401	10.4757	ERC2	0.142857	0.757751			GO_Biological_Process_2021	camera-type eye photoreceptor cell differentiation	1/5	0.242594	0.956808	0	0	4.37847	6.20152	SOX9	0.2	0.61512
GO_Biological_Process_2021	maintenance of protein location in extracellular region	1/7	0.174682	0.57705	0	0	6.00401	10.4757	FBN1	0.142857	0.757751			GO_Biological_Process_2021	regulation of cell proliferation involved in heart morphogenesis	1/5	0.242594	0.956808	0	0	4.37847	6.20152	ENG	0.2	0.61512
GO_Biological_Process_2021	lipoxin biosynthetic process	1/7	0.174682	0.57705	0	0	6.00401	10.4757	HPGD	0.142857	0.757751			GO_Biological_Process_2021	cadmium ion transport	1/5	0.242594	0.956808	0	0	4.37847	6.20152	SLC11A1	0.2	0.61512
GO_Biological_Process_2021	nucleobase catabolic process	1/7	0.174682	0.57705	0	0	6.00401	10.4757	DPYSL3	0.142857	0.757751			GO_Biological_Process_2021	cadmium ion transmembrane transport	1/5	0.242594	0.956808	0	0	4.37847	6.20152	SLC11A1	0.2	0.61512
GO_Biological_Process_2021	L-methionine salvage	1/7	0.174682	0.57705	0	0	6.00401	10.4757	MTAP	0.142857	0.757751			GO_Biological_Process_2021	bundle of His cell action potential	1/5	0.242594	0.956808	0	0	4.37847	6.20152	TRPM4	0.2	0.61512
GO_Biological_Process_2021	L-alanine transport	1/7	0.174682	0.57705	0	0	6.00401	10.4757	SLC36A1	0.142857	0.757751			GO_Biological_Process_2021	regulation of caveolin-mediated endocytosis	1/5	0.242594	0.956808	0	0	4.37847	6.20152	PROM2	0.2	0.61512
GO_Biological_Process_2021	SMAD protein complex assembly	1/7	0.174682	0.57705	0	0	6.00401	10.4757	TGFB1	0.142857	0.757751			GO_Biological_Process_2021	BMP signaling pathway involved in heart development	1/5	0.242594	0.956808	0	0	4.37847	6.20152	BMP2	0.2	0.61512
GO_Biological_Process_2021	intermembrane lipid transfer	1/7	0.174682	0.57705	0	0	6.00401	10.4757	GLTPD2	0.142857	0.757751			GO_Biological_Process_2021	atrial cardiac muscle tissue morphogenesis	1/5	0.242594	0.956808	0	0	4.37847	6.20152	ENG	0.2	0.61512
GO_Biological_Process_2021	insulin secretion involved in cellular response to glucose stimulus	1/7	0.174682	0.57705	0	0	6.00401	10.4757	PTPRN	0.142857	0.757751			GO_Biological_Process_2021	atrial cardiac muscle cell membrane repolarization	1/5	0.242594	0.956808	0	0	4.37847	6.20152	KCNQ1	0.2	0.61512
GO_Biological_Process_2021	inhibitory postsynaptic potential	1/7	0.174682	0.57705	0	0	6.00401	10.4757	GLRA1	0.142857	0.757751			GO_Biological_Process_2021	regulation of astrocyte activation	1/5	0.242594	0.956808	0	0	4.37847	6.20152	NR1D1	0.2	0.61512
GO_Biological_Process_2021	hyaluronan biosynthetic process	1/7	0.174682	0.57705	0	0	6.00401	10.4757	CEMIP	0.142857	0.757751			GO_Biological_Process_2021	reelin-mediated signaling pathway	1/5	0.242594	0.956808	0	0	4.37847	6.20152	VLDLR	0.2	0.61512
GO_Biological_Process_2021	hindlimb morphogenesis	1/7	0.174682	0.57705	0	0	6.00401	10.4757	OSR1	0.142857	0.757751			GO_Biological_Process_2021	anion homeostasis	1/5	0.242594	0.956808	0	0	4.37847	6.20152	CYBRD1	0.2	0.61512
GO_Biological_Process_2021	heart trabecula formation	1/7	0.174682	0.57705	0	0	6.00401	10.4757	TGFBR3	0.142857	0.757751			GO_Biological_Process_2021	amino-acid betaine biosynthetic process	1/5	0.242594	0.956808	0	0	4.37847	6.20152	SHMT1	0.2	0.61512
GO_Biological_Process_2021	xenobiotic catabolic process	1/7	0.174682	0.57705	0	0	6.00401	10.4757	GSTM3	0.142857	0.757751			GO_Biological_Process_2021	response to acetylcholine	1/5	0.242594	0.956808	0	0	4.37847	6.20152	ATP2B4	0.2	0.61512
GO_Biological_Process_2021	negative regulation of dendritic spine development	1/7	0.174682	0.57705	0	0	6.00401	10.4757	NLGN1	0.142857	0.757751			GO_Biological_Process_2021	cerebellar granule cell differentiation	1/5	0.242594	0.956808	0	0	4.37847	6.20152	CBLN1	0.2	0.61512
GO_Biological_Process_2021	negative regulation of digestive system process	1/7	0.174682	0.57705	0	0	6.00401	10.4757	NEUROG1	0.142857	0.757751			GO_Biological_Process_2021	regulation of kidney development	1/5	0.242594	0.956808	0	0	4.37847	6.20152	SOX9	0.2	0.61512
GO_Biological_Process_2021	negative regulation of lymphocyte differentiation	1/7	0.174682	0.57705	0	0	6.00401	10.4757	ID2	0.142857	0.757751			GO_Biological_Process_2021	regulation of sterol transport	1/5	0.242594	0.956808	0	0	4.37847	6.20152	TSPO	0.2	0.61512
GO_Biological_Process_2021	norepinephrine metabolic process	1/7	0.174682	0.57705	0	0	6.00401	10.4757	TH	0.142857	0.757751			GO_Biological_Process_2021	glucuronate catabolic process to xylulose 5-phosphate	1/5	0.242594	0.956808	0	0	4.37847	6.20152	DCXR	0.2	0.61512
GO_Biological_Process_2021	noradrenergic neuron differentiation	1/7	0.174682	0.57705	0	0	6.00401	10.4757	SOX11	0.142857	0.757751			GO_Biological_Process_2021	glucuronate catabolic process	1/5	0.242594	0.956808	0	0	4.37847	6.20152	DCXR	0.2	0.61512
GO_Biological_Process_2021	nodal signaling pathway	1/7	0.174682	0.57705	0	0	6.00401	10.4757	ACVR1C	0.142857	0.757751			GO_Biological_Process_2021	regulation of type B pancreatic cell apoptotic process	1/5	0.242594	0.956808	0	0	4.37847	6.20152	TCF7L2	0.2	0.61512
GO_Biological_Process_2021	neuron projection arborization	1/7	0.174682	0.57705	0	0	6.00401	10.4757	NLGN1	0.142857	0.757751			GO_Biological_Process_2021	gamma-aminobutyric acid metabolic process	1/5	0.242594	0.956808	0	0	4.37847	6.20152	ALDH1A1	0.2	0.61512
GO_Biological_Process_2021	negative regulation of striated muscle tissue development	1/7	0.174682	0.57705	0	0	6.00401	10.4757	TGFB1	0.142857	0.757751			GO_Biological_Process_2021	G protein-coupled opioid receptor signaling pathway	1/5	0.242594	0.956808	0	0	4.37847	6.20152	OPRD1	0.2	0.61512
GO_Biological_Process_2021	negative regulation of ruffle assembly	1/7	0.174682	0.57705	0	0	6.00401	10.4757	KANK1	0.142857	0.757751			GO_Biological_Process_2021	fructose catabolic process to hydroxyacetone phosphate and glyceraldehyde-3-phosphate	1/5	0.242594	0.956808	0	0	4.37847	6.20152	ALDH1A1	0.2	0.61512
GO_Biological_Process_2021	peptide transport	1/7	0.174682	0.57705	0	0	6.00401	10.4757	CDH17	0.142857	0.757751			GO_Biological_Process_2021	fructose catabolic process	1/5	0.242594	0.956808	0	0	4.37847	6.20152	ALDH1A1	0.2	0.61512
GO_Biological_Process_2021	positive regulation of B cell receptor signaling pathway	1/7	0.174682	0.57705	0	0	6.00401	10.4757	PRKCB	0.142857	0.757751			GO_Biological_Process_2021	forebrain regionalization	1/5	0.242594	0.956808	0	0	4.37847	6.20152	BMP2	0.2	0.61512
GO_Biological_Process_2021	positive regulation of cardiac muscle cell differentiation	1/7	0.174682	0.57705	0	0	6.00401	10.4757	TGFB1	0.142857	0.757751			GO_Biological_Process_2021	female genitalia development	1/5	0.242594	0.956808	0	0	4.37847	6.20152	RBP4	0.2	0.61512
GO_Biological_Process_2021	positive regulation of catecholamine secretion	1/7	0.174682	0.57705	0	0	6.00401	10.4757	KCNB1	0.142857	0.757751			GO_Biological_Process_2021	fatty acid omega-oxidation	1/5	0.242594	0.956808	0	0	4.37847	6.20152	CYP4V2	0.2	0.61512
GO_Biological_Process_2021	positive regulation of gastrulation	1/7	0.174682	0.57705	0	0	6.00401	10.4757	OSR1	0.142857	0.757751			GO_Biological_Process_2021	regulation of low-density lipoprotein particle receptor catabolic process	1/5	0.242594	0.956808	0	0	4.37847	6.20152	ANXA2	0.2	0.61512
GO_Biological_Process_2021	positive regulation of histone H3-K9 methylation	1/7	0.174682	0.57705	0	0	6.00401	10.4757	MYB	0.142857	0.757751			GO_Biological_Process_2021	fatty acid derivative catabolic process	1/5	0.242594	0.956808	0	0	4.37847	6.20152	BDH1	0.2	0.61512
GO_Biological_Process_2021	positive regulation of lipopolysaccharide-mediated signaling pathway	1/7	0.174682	0.57705	0	0	6.00401	10.4757	BMP6	0.142857	0.757751			GO_Biological_Process_2021	regulation of sequestering of zinc ion	1/5	0.242594	0.956808	0	0	4.37847	6.20152	SLC30A3	0.2	0.61512
GO_Biological_Process_2021	positive regulation of miRNA metabolic process	1/7	0.174682	0.57705	0	0	6.00401	10.4757	LIN28B	0.142857	0.757751			GO_Biological_Process_2021	establishment of monopolar cell polarity	1/5	0.242594	0.956808	0	0	4.37847	6.20152	FSCN1	0.2	0.61512
GO_Biological_Process_2021	gland morphogenesis	1/7	0.174682	0.57705	0	0	6.00401	10.4757	TGFB1	0.142857	0.757751			GO_Biological_Process_2021	regulation of retinal ganglion cell axon guidance	1/5	0.242594	0.956808	0	0	4.37847	6.20152	SLIT2	0.2	0.61512
GO_Biological_Process_2021	positive regulation of synaptic transmission, GABAergic	1/7	0.174682	0.57705	0	0	6.00401	10.4757	NLGN1	0.142857	0.757751			GO_Biological_Process_2021	regulation of respiratory gaseous exchange by nervous system process	1/5	0.242594	0.956808	0	0	4.37847	6.20152	NLGN3	0.2	0.61512
GO_Biological_Process_2021	positive regulation of vesicle fusion	1/7	0.174682	0.57705	0	0	6.00401	10.4757	SNCA	0.142857	0.757751			GO_Biological_Process_2021	regulation of protein kinase C activity	1/5	0.242594	0.956808	0	0	4.37847	6.20152	TCIM	0.2	0.61512
Reactome_2016	Constitutive Signaling by NOTCH1 t(7;9)(NOTCH1:M1580 K2555) Translocation Mutant	1/7	0.174682	0.940667	0	0	6.00401	10.4757	JAG2	0.142857	0.757751			GO_Biological_Process_2021	regulation of protein import	1/5	0.242594	0.956808	0	0	4.37847	6.20152	ARHGEF5	0.2	0.61512
GO_Biological_Process_2021	negative regulation of nervous system process	1/7	0.174682	0.57705	0	0	6.00401	10.4757	GLRA1	0.142857	0.757751			GO_Biological_Process_2021	regulation of plasma membrane organization	1/5	0.242594	0.956808	0	0	4.37847	6.20152	SYTL4	0.2	0.61512
GO_Biological_Process_2021	glandular epithelial cell development	1/7	0.174682	0.57705	0	0	6.00401	10.4757	BMP6	0.142857	0.757751			GO_Biological_Process_2021	regulation of neutrophil degranulation	1/5	0.242594	0.956808	0	0	4.37847	6.20152	SYK	0.2	0.61512
GO_Biological_Process_2021	glyceraldehyde-3-phosphate metabolic process	1/7	0.174682	0.57705	0	0	6.00401	10.4757	ALDOB	0.142857	0.757751			GO_Biological_Process_2021	regulation of neutrophil activation	1/5	0.242594	0.956808	0	0	4.37847	6.20152	SYK	0.2	0.61512
GO_Biological_Process_2021	fatty acid elongation, unsaturated fatty acid	1/7	0.174682	0.57705	0	0	6.00401	10.4757	ELOVL6	0.142857	0.757751			GO_Biological_Process_2021	regulation of morphogenesis of a branching structure	1/5	0.242594	0.956808	0	0	4.37847	6.20152	FGFR2	0.2	0.61512
GO_Biological_Process_2021	regulation of fat cell proliferation	1/7	0.174682	0.57705	0	0	6.00401	10.4757	PID1	0.142857	0.757751			GO_Biological_Process_2021	cyclic-GMP-AMP transmembrane import across plasma membrane	1/5	0.242594	0.956808	0	0	4.37847	6.20152	LRRC8E	0.2	0.61512
Reactome_2016	SLC transporter disorders	1/7	0.174682	0.940667	0	0	6.00401	10.4757	AVP	0.142857	0.757751			GO_Biological_Process_2021	CRD-mediated mRNA stabilization	1/5	0.242594	0.956808	0	0	4.37847	6.20152	IGF2BP1	0.2	0.61512
Reactome_2016	TGFBR1 KD Mutants in Cancer	1/7	0.174682	0.940667	0	0	6.00401	10.4757	TGFB1	0.142857	0.757751			Reactome_2016	Serotonin and melatonin biosynthesis	1/5	0.242594	0.999996	0	0	4.37847	6.20152	ASMT	0.2	0.61512
Reactome_2016	Loss of Function of SMAD2/3 in Cancer	1/7	0.174682	0.940667	0	0	6.00401	10.4757	TGFB1	0.142857	0.757751			GO_Biological_Process_2021	glucose metabolic process	5/62	0.243146	0.956808	0	0	1.5377	2.17445	TKTL1;RBP4;G6PC2;DCXR;ENO2	0.0806452	0.614133
Reactome_2016	SMAD2/3 MH2 Domain Mutants in Cancer	1/7	0.174682	0.940667	0	0	6.00401	10.4757	TGFB1	0.142857	0.757751			GO_Biological_Process_2021	response to retinoic acid	5/62	0.243146	0.956808	0	0	1.5377	2.17445	RBP4;PTK7;FZD7;GATA6;SOX9	0.0806452	0.614133
Reactome_2016	Signaling by NOTCH1 t(7;9)(NOTCH1:M1580 K2555) Translocation Mutant	1/7	0.174682	0.940667	0	0	6.00401	10.4757	JAG2	0.142857	0.757751			GO_Biological_Process_2021	cellular component assembly	17/261	0.247574	0.956808	0	0	1.22286	1.70718	YAP1;MAGI1;NLGN3;CD40;CAPG;AIF1;GRHL2;TFAP4;STAG3;FSCN1;DCX;FSCN3;SOX9;RHOV;FSCN2;LCP1;TEAD2	0.0651341	0.606296
GO_Biological_Process_2021	purine-containing compound metabolic process	1/7	0.174682	0.57705	0	0	6.00401	10.4757	TTR	0.142857	0.757751			GO_Biological_Process_2021	negative regulation of cold-induced thermogenesis	4/47	0.248095	0.956808	0	0	1.63037	2.27264	DDIT3;ALDH1A1;NR1D1;MAP2K6	0.0851064	0.605382
GO_Biological_Process_2021	regulation of aldosterone biosynthetic process	1/7	0.174682	0.57705	0	0	6.00401	10.4757	BMP6	0.142857	0.757751			GO_Biological_Process_2021	glycosphingolipid metabolic process	4/47	0.248095	0.956808	0	0	1.63037	2.27264	UGT8;HEXB;ESYT3;ST6GALNAC5	0.0851064	0.605382
GO_Biological_Process_2021	arginine catabolic process	1/7	0.174682	0.57705	0	0	6.00401	10.4757	DDAH1	0.142857	0.757751			GO_Biological_Process_2021	positive regulation of pathway-restricted SMAD protein phosphorylation	4/47	0.248095	0.956808	0	0	1.63037	2.27264	GDF11;BMP2;RBPMS;ENG	0.0851064	0.605382
GO_Biological_Process_2021	regulation of atrial cardiac muscle cell membrane repolarization	1/7	0.174682	0.57705	0	0	6.00401	10.4757	FLNA	0.142857	0.757751			GO_Biological_Process_2021	regulation of dendritic spine morphogenesis	3/32	0.248439	0.956808	0	0	1.81274	2.52435	ARC;NGEF;LZTS3	0.09375	0.604781
GO_Biological_Process_2021	atrioventricular valve formation	1/7	0.174682	0.57705	0	0	6.00401	10.4757	GATA4	0.142857	0.757751			GO_Biological_Process_2021	negative regulation of developmental growth	3/32	0.248439	0.956808	0	0	1.81274	2.52435	MAG;TRIM46;MT3	0.09375	0.604781
GO_Biological_Process_2021	bleb assembly	1/7	0.174682	0.57705	0	0	6.00401	10.4757	PMP22	0.142857	0.757751			GO_Biological_Process_2021	positive regulation of receptor signaling pathway via STAT	3/32	0.248439	0.956808	0	0	1.81274	2.52435	MGAT5;IL10RA;KIT	0.09375	0.604781
GO_Biological_Process_2021	calcium ion export	1/7	0.174682	0.57705	0	0	6.00401	10.4757	SLC8A2	0.142857	0.757751			Reactome_2016	SMAD2/SMAD3:SMAD4 heterotrimer regulates transcription	3/32	0.248439	0.999996	0	0	1.81274	2.52435	WWTR1;TGIF2;JUNB	0.09375	0.604781
GO_Biological_Process_2021	regulation of cGMP-mediated signaling	1/7	0.174682	0.57705	0	0	6.00401	10.4757	PDE10A	0.142857	0.757751			GO_Biological_Process_2021	regulation of Wnt signaling pathway	8/111	0.25163	0.956808	0	0	1.36201	1.8793	DEPDC1B;BMP2;PTK7;FRZB;FZD7;KREMEN1;DCDC2;FGFR2	0.0720721	0.599238
GO_Biological_Process_2021	regulation of extracellular matrix assembly	1/7	0.174682	0.57705	0	0	6.00401	10.4757	TGFB1	0.142857	0.757751			GO_Biological_Process_2021	negative regulation of endopeptidase activity	5/63	0.253409	0.956808	0	0	1.5111	2.07437	SPOCK2;SERPINH1;SERPING1;MT3;TIMP4	0.0793651	0.596178
Reactome_2016	Loss of Function of TGFBR1 in Cancer	1/7	0.174682	0.940667	0	0	6.00401	10.4757	TGFB1	0.142857	0.757751			GO_Biological_Process_2021	neuropeptide signaling pathway	5/63	0.253409	0.956808	0	0	1.5111	2.07437	OPRD1;GPR37;GAL;PENK;SORCS3	0.0793651	0.596178
GO_Biological_Process_2021	cellular response to laminar fluid shear stress	1/7	0.174682	0.57705	0	0	6.00401	10.4757	ASS1	0.142857	0.757751			GO_Biological_Process_2021	actin cytoskeleton reorganization	5/63	0.253409	0.956808	0	0	1.5111	2.07437	EFS;PTK7;KIT;GAB1;MICALL2	0.0793651	0.596178
GO_Biological_Process_2021	regulation of respiratory system process	1/7	0.174682	0.57705	0	0	6.00401	10.4757	TSHZ3	0.142857	0.757751			Reactome_2016	EPH-Ephrin signaling	7/95	0.253743	0.999996	0	0	1.39471	1.91275	EFNB3;MMP2;MYH14;MYL9;EFNA4;EPHB4;NGEF	0.0736842	0.595605
GO_Biological_Process_2021	cellular response to prostaglandin E stimulus	1/7	0.174682	0.57705	0	0	6.00401	10.4757	PTGER4	0.142857	0.757751			GO_Biological_Process_2021	programmed necrotic cell death	2/18	0.25388	0.956808	0	0	2.18987	3.00208	LY96;TLR3	0.111111	0.595371
GO_Biological_Process_2021	regulation of striated muscle cell differentiation	1/7	0.174682	0.57705	0	0	6.00401	10.4757	NRG1	0.142857	0.757751			Reactome_2016	cGMP effects	2/18	0.25388	0.999996	0	0	2.18987	3.00208	PDE3A;PDE5A	0.111111	0.595371
GO_Biological_Process_2021	fatty acid elongation, polyunsaturated fatty acid	1/7	0.174682	0.57705	0	0	6.00401	10.4757	ELOVL6	0.142857	0.757751			Reactome_2016	Activation of IRF3/IRF7 mediated by TBK1/IKK epsilon	2/18	0.25388	0.999996	0	0	2.18987	3.00208	LY96;TLR3	0.111111	0.595371
GO_Biological_Process_2021	fatty acid elongation, monounsaturated fatty acid	1/7	0.174682	0.57705	0	0	6.00401	10.4757	ELOVL6	0.142857	0.757751			Reactome_2016	Activation of SMO	2/18	0.25388	0.999996	0	0	2.18987	3.00208	EVC;ARRB1	0.111111	0.595371
GO_Biological_Process_2021	regulation of skeletal muscle satellite cell proliferation	1/7	0.174682	0.57705	0	0	6.00401	10.4757	EPHB1	0.142857	0.757751			GO_Biological_Process_2021	positive regulation of response to endoplasmic reticulum stress	2/18	0.25388	0.956808	0	0	2.18987	3.00208	DDIT3;PMAIP1	0.111111	0.595371
GO_Biological_Process_2021	regulation of skeletal muscle contraction	1/7	0.174682	0.57705	0	0	6.00401	10.4757	KCNJ2	0.142857	0.757751			GO_Biological_Process_2021	positive regulation of nervous system process	2/18	0.25388	0.956808	0	0	2.18987	3.00208	EGR2;NCMAP	0.111111	0.595371
GO_Biological_Process_2021	fatty acid elongation, saturated fatty acid	1/7	0.174682	0.57705	0	0	6.00401	10.4757	ELOVL6	0.142857	0.757751			GO_Biological_Process_2021	positive regulation of interleukin-4 production	2/18	0.25388	0.956808	0	0	2.18987	3.00208	CEBPB;SYK	0.111111	0.595371
GO_Biological_Process_2021	regulation of relaxation of muscle	1/7	0.174682	0.57705	0	0	6.00401	10.4757	NEUROG1	0.142857	0.757751			GO_Biological_Process_2021	nitric oxide mediated signal transduction	2/18	0.25388	0.956808	0	0	2.18987	3.00208	DDAH2;MAFA	0.111111	0.595371
GO_Biological_Process_2021	detection of stimulus involved in sensory perception of pain	1/7	0.174682	0.57705	0	0	6.00401	10.4757	EPHB1	0.142857	0.757751			GO_Biological_Process_2021	maintenance of gastrointestinal epithelium	2/18	0.25388	0.956808	0	0	2.18987	3.00208	RBP4;SOX9	0.111111	0.595371
GO_Biological_Process_2021	dense core granule cytoskeletal transport	1/7	0.174682	0.57705	0	0	6.00401	10.4757	SYT4	0.142857	0.757751			GO_Biological_Process_2021	interleukin-6-mediated signaling pathway	2/18	0.25388	0.956808	0	0	2.18987	3.00208	YAP1;SOCS3	0.111111	0.595371
GO_Biological_Process_2021	regulation of inositol phosphate biosynthetic process	1/7	0.174682	0.57705	0	0	6.00401	10.4757	SNCA	0.142857	0.757751			GO_Biological_Process_2021	dendritic cell migration	2/18	0.25388	0.956808	0	0	2.18987	3.00208	CXCR4;TRPM4	0.111111	0.595371
[truncated: 3,137 more rows]

## Sheet: Sheet3
Sheet3: DEGs of pig MEIS2-positive vs MEIS2-negative cells
[truncated: 14,758 more rows]

[truncated: 3 more sheets: Sheet4, Sheet5, Sheet6]
