# Supplementary material for: A multimodal cross-species comparison of pancreas development
Source: Research Square preprint supplement (doi:10.21203/rs.3.rs-4151759/v1), 2024-04-03
Supplement: Supplementary file 5 [file 871cb673236c36d05f12a27b.xlsx]

## Sheet: Sheet Content
Supplementary Table 7 Differentially expressed genes and enriched pathways comparing between lineages by tradeSeq
Sheet1: Differential expressed genes comparing lineages NGN3-to-Beta,0 and PEC-to-Beta,0
Sheet2: Differential expressed genes comparing lineages PEC-to-Beta,1 and PEC-to-Beta,0
Sheet3: Enriched pathways of gene cluster 1 for lineages NGN3-to-Beta,0 vs PEC-to-Beta,0
Sheet4: Enriched pathways of gene cluster 2 for lineages NGN3-to-Beta,0 vs PEC-to-Beta,1
Sheet5: Enriched pathways of gene cluster 1 for lineages PEC-to-Beta,1 vs PEC-to-Beta,0
Sheet6: Enriched pathways of gene cluster 2 for lineages PEC-to-Beta,1 vs PEC-to-Beta,0
Sheet7: Enriched pathways of gene cluster 3 for lineages PEC-to-Beta,1 vs PEC-to-Beta,0
Sheet8: Enriched pathways of gene cluster 4 for lineages PEC-to-Beta,1 vs PEC-to-Beta,0

## Sheet: Sheet1
Sheet1: Differential expressed genes comparing lineages NGN3-to-Beta,0 and PEC-to-Beta,0
Gene name	waldStat_1vs4	df_1vs4	pvalue_1vs4	abs(logFC)	transientScore
SOX5	1.55833e+16	60	4.51609e-16	2951694920353932	865000
KCNJ8	1704685144643158	60	91125918768247	1.07354e+16	9370
ENSSSCG00000000576	3039855502916596	60	1.14474e-46	9641323633201624	841970
ERP27	1.50852e+16	60	5.10892e-14	4119449804308978	735440
YBX3	3290994300191655	60	1.09126e+11	5710688074265752	148000
SLC22A23	4999549385122154	60	4.71086e+06	4830911974810287	284840
DCDC2	1.63847e+16	60	9.06662e-18	1608465962236656	1119770
SCGN	6645795275674619	60	2.71024e-126	82329832594473	1897280
H1-3	5887059885129272	60	76314.2	3535604915419884	450080
GRM4	4869948603601971	60	8.56315e+06	5891055189228691	223490
ENSSSCG00000001551	3343451416119756	60	8.64832e+09	8005939290038016	93440
CLPS	3128721963577309	60	1.42515e-49	3649337286946317	1045490
SSTR1	2.0968e+16	60	1.64739e-27	1.01361e+16	728450
NPAS3	2169079425929672	60	4.74797e-29	221308019497078	1640420
SLC7A8	164425898224677	60	6.83572e-18	5047598463934788	706340
SLCO3A1	3.33832e+16	60	8.84742e+09	3427489620051027	306730
TC2N	1.07472e+16	30	131743727149097	3285278789001304	243400
CHGA	7852093768764386	60	2.4157e-150	3568665819707378	1170900
NQO1	4515449820006396	60	4.36076e+07	651171946791339	191610
TOX3	1613412361087853	60	13051892882846	2931333333997736	300730
GPT2	95433311385164	30	228748298897797	103689796947363	691700
CEBPA	1.96883e+16	60	8.74248e-25	1.14202e+16	694250
APOE	6195419970739276	60	180256	2730198548597015	577730
PPP1R15A	4624611949276667	60	2.64462e+08	51225967087678	248840
HSPG2	1.84581e+16	60	51836798519587	5461525614674381	92480
ENSSSCG00000003839	8658298096945673	60	1.55087	7944186995136531	385450
FAAH	4507185436198756	60	4.52884e+08	2095477825497084	582610
LRP11	7933071846398494	60	4.91174	1206634828613053	956930
CCN2	2.24368e+16	60	10088020093365	4209948032103568	183380
TPD52L1	1.26823e+16	60	5.99467e-09	3171505521306355	760400
TENT5A	1.67797e+16	60	101278694461345	584189701212407	73300
ONECUT2	2.59708e+16	60	3.4488e-37	717080354944501	824420
SCG3	1.67778e+16	60	1.33127e-17	1761332032118936	1089160
GATM	1.25623e+16	60	1.0721e-08	2643436996552707	855940
SORD	2.26287e+16	60	9308496188371	2368514141792882	411130
SELENOS	2.31839e+16	60	73717796894	2870485518064222	339300
CACHD1	2905912831158771	60	5.92893e+10	728833521565381	816290
CCBE1	2.06859e+16	60	6.57296e-27	1156163522131915	1373200
FBXO33	3493914400939829	60	4.42809e+09	886112565930599	813640
ELAVL2	9314774516899652	60	0.0671619	4436652210692222	549650
NFIB	6360452427544463	60	83.1063	1824738675895066	723700
PGM5	808242874844332	60	2.41383	8299519302493257	336960
CCDC107	2.75611e+16	60	1136357439226	9541496420800072	49540
PBX3	3.13955e+16	40	2.54222e+10	2218635225682084	483650
ASS1	2974192844383548	60	4.40068e+11	4252561567605459	206660
TARS3	1900173351833496	60	41607063961991	4811820441783095	132210
SNTB1	3863761411984165	60	8.4288e+08	4253979699717293	253760
CDH17	5241363523385667	60	5.30091e-94	7636465680913888	953290
FABP5	2.02875e+16	60	24611465996077	1621383010419646	533530
TOX	7350157559601061	60	7.80661	15693130283565	826020
PENK	4003918955167227	60	2.30263e-68	1.1781e+16	884050
CRABP2	2.80934e+16	60	9.02324e+09	2686873362282491	382120
ENSSSCG00000006525	3967821893419568	60	5.2688e+08	58248329180125	180410
ADAMTSL4	4.18642e+16	60	1.95586e+09	1151588522686229	789620
NOTCH2	7171738735544079	60	1816.09	844052352851769	1016650
ENSSSCG00000006777	5373922516313727	60	832657	3511339792523177	423650
ZDHHC2	2.23131e+16	60	106241083143	2331531063680922	417170
PLAT	1.67543e+16	60	102301298962211	7348059521358348	34250
PRNP	5035708844566792	60	3.9865e+06	65398805603552	1127410
CTSZ	9397738856661778	60	0.00451342	455119475662756	548980
NPTX2	4463419274347408	60	5.53255e+07	1540048434432762	677480
TMEM130	8147395153081669	60	17.7181	4852295152046645	447880
MLXIPL	8743999909462902	60	1.03	3212230238596099	618980
HBZ	8840194953065595	60	0.0650487	911485345610447	1098490
ENSSSCG00000007978	1118094505662756	60	8.51701e-08	6659538990765964	511850
PDIA2	3887180715668252	60	7.58387e+08	7089801842329875	139220
FABP1	3278446854314371	60	1.15361e+11	5224728358518732	164930
TGFA	9617103581667464	60	0.0157682	152659267166588	1346580
MXD1	2.64647e+16	60	1823602202955	4982691686035486	147460
CCDC88A	1443758480891363	60	1.1943e-12	2885736530791896	848000
SDC1	1.64776e+16	40	24408693876238	1853794075245225	469450
ID2	5145420096686436	60	6.19085e-92	686317989769165	1719400
LRATD1	7573562593064608	60	270.804	4917203983279833	410330
SLIT2	602928641910641	60	39246.9	9277394642019616	249250
LIMCH1	1.01793e+16	60	0.00106004	390387752930255	1311250
AFP	8534302849714685	60	2.80279	2478692668884704	722020
CAMK2D	4.64633e+16	60	2.3939e+08	3019002636186986	426850
SPP1	3763469506647823	60	1.32402e+10	7803224347995565	115400
POSTN	2083762964566224	60	3.12324e-27	1.49876e+16	712930
PCDH17	5.06227e+16	60	3.52611e+07	9120705191348284	179890
SLITRK6	1680309093136582	60	1.17646e-17	4192467990374215	773930
GPC6	2.49371e+16	60	3507269893523	716875932922274	69640
EGR3	1.38408e+16	60	2.17231e-12	165239032093094	1035370
RIMBP2	1.76947e+16	60	70420757286978	1403068756039304	587060
BICC1	4.38474e+16	60	792537	102107033296997	1070920
KCNMA1	7225399478441902	60	140.899	83585027754097	1028840
GLUD1	5785024221047114	60	122887	4560984300395836	351290
PRKG1	1886031475016104	60	5.04156e-24	7617903205632839	684500
A1CF	1616685116966335	60	2.62442e-17	1421777843932418	1156810
SLC16A12	5.24827e+16	60	1.4912e+07	6658714131519716	229940
HOGA1	6581529350385668	60	2939.91	166104724308308	762980
FBXW4	140586977666944	60	289873060416176	1515665799499878	557320
PSD	5301131116782013	60	1.16715e+06	239356007316783	1096000
ABLIM1	2.20858e+16	60	6.82831e-30	1901480227725125	1197800
PNLIPRP1	1.80139e+16	60	3.16971e-20	1803821991500198	1119700
PNLIPRP2	1928416721757116	60	6.32823e-24	1437522752665533	1247210
FGFR2	6715991065118718	60	15609.6	5928708721965676	336250
ENSSSCG00000010968	2104920550309765	60	17976397789362	952478453742437	719060
BAMBI	4781513301194698	60	1.28649e+08	5448041333403822	240250
ZEB1	2703141630361135	60	1.85823e-40	2312450539375747	1212980
VIM	1.49114e+16	60	1.19076e-13	4165183941595898	728100
PIP4K2A	1.82785e+16	60	55726085897849	2419961519013313	387540
ASB13	7978505050660503	60	3.95744	5497524247829674	403220
ADAMTS9	1.68912e+16	60	96914886464952	9791520322367934	11050
MAGI1	3128422655966488	60	2.23701e+10	3897286736538132	245450
CIDEC	5822241581738446	60	1.03292e+06	6180969440772731	281250
WWTR1	3034649848962587	60	3.37725e+10	9869134360186388	58580
SERPINI2	3932398724636794	60	6.18351e+08	4669790812431974	236050
AHSG	8155193461734135	60	17.0724	3058091644919441	607140
ALCAM	1.38282e+16	60	2.30903e-11	1693352389235584	1017410
ENSSSCG00000012517	1.34426e+16	60	1.5017e-11	6430662610920335	571680
ENSSSCG00000012527	2.02106e+16	60	25401816747089	373116934848978	895050
SLC25A53	8635866127939991	60	1.72618	684330648064954	1161890
ENSSSCG00000012541	5988346769360878	60	47531.7	491227544229598	1078160
TRPC5	9573164895737348	60	0.019467	2324788459149458	828370
SEPTIN6	2820035851079884	60	8.614e+10	5076828134314089	148930
GAL	7673244605602795	60	168.756	6292360927088807	364520
PAX6	3.16393e+16	60	2.50583e-50	1145765544084875	1522810
JUNB	4013182468943634	60	4.29134e+09	3473404176185525	335250
TMEM59L	2120265351467922	60	5.21082e-27	371728543057514	927810
VCAN	2.102e+16	60	18194804222586	1203633400978949	661160
RGMB	6114039745031315	60	8.08577e-114	4917716407379311	1048720
FBN2	2.27228e+16	60	894844964079	3993718869398183	201890
ADAMTS19	2.26948e+16	60	9054026040612	1.53651e+16	24020
CDC25C	7922462639391132	60	5.16582	639184276901548	1125540
ARHGAP26	3247306513228346	60	1.32401e+10	3150707987096114	321610
HBB	8652092302409557	60	1.59751	1098708267135338	368050
HBE1	1.63686e+16	60	9.80841e-18	3386284754139689	824580
ARRB1	678927044745309	60	11051.4	4288129674994473	424400
AMOTL1	9411399255939616	60	0.0422744	4047039452917057	587770
TFPI2	2333007222060399	60	6931403302945	9304730685734314	36500
ASNS	1.91576e+16	60	39055564510088	3800858797770901	206240
FAM126A	2407765324880025	60	5053567590454	127436398407739	651370
GRB10	1.64342e+16	60	116035790179217	472009417686423	848770
RBPMS	3634401151053279	60	2.36311e+10	9062828051303464	105650
GCG	1.99349e+16	60	2.61057e-24	1.06895e+16	700960
SLC38A11	1.8698e+16	60	1.11599e-21	3662829833512774	857000
SCN9A	2085619159978712	60	2.85144e-27	749584112421744	1480000
KLHL23	2.49329e+16	60	3513649982247	365009614719676	920530
ITGA4	2.32081e+16	60	7296988659317	6428989773307893	80330
CERKL	5167715282199494	60	2.16541e+06	769689510987129	933140
FRZB	2.05791e+16	60	1.10974e-25	5367873162533354	794410
COL5A2	2.34191e+16	60	9.76196e-33	7221803441820571	795400
GLS	5317678693223617	60	1.08094e+07	116538856250639	859300
PGAP1	4.53158e+16	60	4.05036e+08	2205650471875242	574900
SPATS2L	1.20598e+16	60	1.22005e-07	7396667019214921	516500
MAP2	3.90919e+16	60	2.50307e-65	895686424199214	1593860
FN1	1.17299e+16	60	6.01479e-08	4379110468338715	623610
TUBA4A	4269855024352088	60	1.33811e+09	2439333012196619	497930
SERPINE2	1.664e+16	60	107014158243989	936459367380935	711170
KIF1A	2.37516e+16	60	5801428345654	3911598661038826	214120
INSIG1	4258203291540712	60	1.41102e+09	1631100363791235	633970
PRSS2	3203523706269434	60	3.54777e-50	3635421444854785	1060000
KIAA1549	4344314091212792	60	9.53079e+07	783212514991238	880720
CALD1	4022307285866742	60	4.11769e+09	1357736795810978	712610
CPA1	4626707288335136	60	9.19468e-82	2436131894988908	1282370
GPR37	7593217828165999	60	246.699	203543874922526	748730
CADPS2	4396777305721597	60	7.50167e+07	719055650720248	909730
FOXP2	1392274522272414	60	305111490509091	6954979988766552	38530
LIFR	1924773504632776	60	37650751523389	7471773965387714	37930
HMGCS1	8249494651862264	60	10.8959	1574784943236161	871250
ITGA1	3364757439401508	60	7.86787e+09	2794005038419914	399620
MAP1B	4160097082466633	60	1.0091e-70	210125105541178	1330820
DUSP1	1.22592e+16	60	4.65063e-09	87774881367834	1439780
SPARC	1.02924e+16	60	6.15457e-05	2344251927216575	841480
OTOP3	3381793791243051	60	7.29443e+09	6583098652090729	125890
RUNDC3A	6353356147879661	60	8592.2	198448105310093	1161680
PPY	1.93153e+16	60	5.43411e-23	1235097662838519	1311220
ARL4D	1.69211e+16	60	6.61338e-18	1.25955e+16	615850
MMD	8414965531133764	60	0.495206	4718893835646749	477380
VMP1	1.68118e+16	60	100005449254899	3569674685322572	218000
RAB3B	9134709154306356	60	0.159053	1067234670364319	1082450
DPEP2	3091302397259667	60	2.63371e+11	5185412633144088	154260
HIST1H2BD	5146235004697792	60	2.3917e+07	1682627386634429	667080
PLXNA4	5123129437021615	60	2.66148e+07	16821604703835	1138820
CDK5R2	1737980460487181	60	7.03442e-20	1269918459147515	1250000
GPX8	9500408598505448	60	0.027593	5420406973113439	508610
ANKS1B	2.3708e+16	60	2.35899e-32	969624594477134	773540
EGFR	3623147889728212	60	2.48527e+10	338154572989073	986170
ANKRD50	4153118887962943	60	2.27533e+09	581391241454251	190600
DEPP1	2532204299634229	60	8.40717e-37	7537568140312829	804420
GATA4	1.00318e+16	60	0.00215344	1166719699671691	1092170
RGN	1.59244e+16	60	141654277698482	1493048620867732	567440
SLC3A2	1.92089e+16	60	9.14773e-24	2082112741849082	1116020
NFASC	1.70879e+16	60	2.92791e-18	1909994329783313	1073700
ENSSSCG00000023012	4942490040693243	60	1.45717e-87	124148790963674	1848340
ENSSSCG00000023127	478300287916852	60	3.96602e-84	72758323204019	1866850
VAV3	2.06762e+16	60	20971844776626	7923760696570943	32080
ITPR1	1.18452e+16	60	3.44536e-08	2727880318433121	818890
CHIA	8331210940058552	60	1.07267e-160	699513936088212	1751210
GRM7	1.11257e+16	60	1.11161e-06	123566136363179	468000
ENSSSCG00000024009	3.02913e+16	60	3.45998e+10	6087283963028582	114250
TGIF1	761523974879445	60	222.227	3587633924606498	516500
MT3	2.24377e+16	60	1.21251e-29	2481733832332052	1106290
ID4	1.46247e+16	60	4.80723e-13	4835434822131619	671060
KLK1	5229690744489462	60	1.62525e+07	7549341980190636	209960
DSC2	2406422689830726	60	5082400364764	4372596295616668	176660
GRIK1	1448969822642549	60	9.26907e-14	66112612526407	586450
PAK3	5871046076125556	60	82242	1648388776829784	734260
ENSSSCG00000025414	1861362668432316	60	1.68627e-21	817251458080015	1395540
ENSSSCG00000025500	1.09118e+16	60	3.11796e-06	2466633289663609	822330
DOCK4	1372310499622864	60	3.84705e-12	6498026989658331	573410
PKLR	1.83516e+16	60	6.0768e-21	1287052142857873	645650
B3GAT2	2630687363335976	60	6.59176e-39	3984665799388995	974800
CLGN	6571178107184473	60	30866.3	573876808644083	1097650
SNCG	2.31206e+16	60	4.23229e-32	2147799702598845	1188890
NFE2L3	5731274131990905	60	1.57905e+06	5373550875014852	306340
ROS1	1.53901e+16	60	1.15736e-14	3063673390097742	840170
COL6A3	6108155308697866	60	27130.7	1.22387e+16	245050
ZFP36L1	8264346061456975	60	10.1517	1.34024e+16	346120
LTC4S	4195898830707257	60	1.87338e+09	3804667499031264	314210
BMP3	3.95231e+16	60	2.96329e-68	450478212730502	1734650
SCLT1	1.54768e+16	60	168551451782703	3290433233066462	241060
ZBTB16	9280587745341894	60	0.00791104	429795850162025	1268370
TCF7	1901730603559821	60	41345054474198	5003264449549768	117770
ENSSSCG00000031177	1.22822e+16	60	4.16139e-08	4030254783366072	676000
SNORD60	1612672716798034	60	130896951051004	2676835597523542	343460
TXNIP	4069214349791806	60	9.08517e-71	2906755267914143	1194290
UPK3A	1965359596781968	60	1.03607e-23	6138970000170755	745730
YAP1	4273202268895009	60	1.31787e+08	7225801360906539	160180
RNASE4	1928321481748444	60	37111266997369	374251702585189	887720
RNASE1	4.04972e+16	60	3.63699e+09	4220259414446485	273250
RAB3C	3.37741e+16	60	6.60271e-55	2302393960891766	1274650
AQP8	5173111360720467	60	2.112e+07	646361188448237	986120
GPC5	1.9024e+16	60	2.26194e-22	7691955611066377	686800
RIMS2	5661675233005517	60	2.18417e+06	2975127661257187	492490
MGAT4C	2561650876697743	60	1.97328e-37	3001379436082664	1062890
SPOCK1	4541561866424297	60	6.25724e-80	7721002597875622	920250
ENSSSCG00000032480	8757824363366773	60	0.0964179	3812015235725854	566800
ENSSSCG00000032552	1.3963e+16	60	300520448888827	1365336096576443	590740
ENSSSCG00000032942	818718046092938	60	14.6606	1536842029199678	881450
RGS6	5300848058225435	60	1.16869e+07	8976414075227228	205460
FLNA	1.6517e+16	60	11232372696085	708625801706333	781650
LY6H	1.02913e+16	60	6.18754e-05	1191045161578606	1095460
ST6GALNAC5	2467239536803269	60	2.05564e-35	95270815783236	1469800
SMLR1	3204636923428495	60	1.5987e+11	824958842864289	77690
CPLX2	1.4758e+16	60	2.51214e-13	1531056196576967	1104520
ENSSSCG00000033786	8454486578963196	60	0.410148	654444855828962	399680
U6-543	1487354205697654	40	49708154760471	1306679770779088	610580
GNAO1	1.45453e+16	60	7.07262e-14	139964936822208	1133200
LRMDA	9635420172584228	60	0.014442	1.25582e+16	433640
SPINK1	6382395970629584	60	1.31109e-118	4763907822223086	1067930
ENSSSCG00000034610	1880764426131526	60	45011315643958	2314921741320782	416450
CXCL12	2.31151e+16	60	4.34975e-32	2662503179706987	1096720
ENSSSCG00000035374	2747326934095908	60	1180367427269	3106287126763832	303400
RFX2	2.5564e+16	60	2683681262517	607786914484591	858500
COL1A1	3.8952e+16	60	7.31433e+08	1482016347771777	104130
ELOVL6	8139283813440545	60	18.4156	2531653815221205	681050
ENSSSCG00000036505	1.63546e+16	60	1.05037e-17	344361198530116	813650
DPYSL3	1.22117e+16	60	5.85159e-10	4534949554571748	632080
NKAIN2	3733225226925885	60	1.51278e-61	7648113283111417	886450
AVPI1	1.78215e+16	60	66940772476316	1212111235018798	641800
FABP3	1305586857956983	60	9.80318e-11	617662067502787	1333250
RGS2	1790426370635381	60	5.41889e-21	12226861905407	1608480
CHAC2	6655915884988966	60	2071.44	5669894998029794	348170
ENSSSCG00000037620	5440813625677652	60	610327	6141840976128202	262250
ENSSSCG00000037775	1.39243e+16	60	304927485532679	1.24688e+16	1370
PRLHR	4.96797e+16	60	5.45003e+06	1361034503139309	754120
ENSSSCG00000038067	6905052904329487	60	640.113	1097431590491868	960100
HSD17B2	117228944035295	60	6.22091e-08	9353419941490164	483080
ENSSSCG00000038233	57075425524908	60	1.7638e+06	8146704495929907	228370
FAM162B	3.26841e+16	60	1.206e+11	1496770483768566	628930
CCND2	1.64531e+16	60	115177596675418	1623517744093853	517850
ENSSSCG00000038713	4349616835685498	60	9.30305e+07	2324854632142133	532250
SERPINF2	2.83653e+16	60	2.59536e-43	1815375409093483	1287490
PCDH9	3.06965e+16	60	2.89654e+11	9123786970487968	65000
C1QL1	9116659615858978	60	0.173403	1.31338e+16	392400
CXCR4	8031264878005675	60	3.25042e-154	7251124897111577	992360
ENSSSCG00000039446	2649995137169169	60	1796140918553	135056109213371	962600
ID3	2.76791e+16	60	7.63876e-42	3367199002059598	1043720
CAMK2B	5476553153071863	60	51693.3	4553236490899753	341920
TMEM179	7205660373563462	60	1546.9	2974404324258881	571220
PTGFR	1.64385e+16	60	115840025575972	2950467430672882	294660
ENSSSCG00000039821	6516674763185898	60	39886.3	1524496631058809	808250
RASL11A	1946792751305384	60	34422037446541	1.32438e+16	12500
TMEM38B	2.63855e+16	60	1886776563276	2937081686557518	331840
NUPR1	5949968470559224	60	568751	5764937708808623	309780
SGTB	528626814019589	60	1.25042e+06	6716346611202437	230130
ENSSSCG00000041267	1105543852354798	60	1.56024e-05	2272654537131237	882500
ENSSSCG00000041401	3.3027e+16	60	1.03611e+11	7912984569153806	90740
ENSSSCG00000041486	2109650955745041	60	17627804650477	9131090408279886	27250
ENSSSCG00000041677	8890985962942403	60	0.0510283	689651650311438	1177700
KCNJ11	1.75183e+16	60	3.57518e-19	4269375921596323	781300
ENSSSCG00000042224	2197622661668236	60	12229428404746	1119376406353147	23140
ENSSSCG00000042386	3.16184e+16	60	1.93082e+11	5830577883100653	132970
ENSSSCG00000042993	2910295774876719	60	6.83099e-45	1891886682795383	1280210
ENSSSCG00000043221	3.48133e+16	60	4.68375e+09	2395181592203867	466970
ENSSSCG00000044013	65505646334106	60	34009.6	921615590061799	972100
ENSSSCG00000044115	2.16153e+16	60	14213294842857	2788892544310617	343360
ENSSSCG00000044128	7602114445555593	60	236.504	2488726457950701	659970
ENSSSCG00000044214	884244430332579	60	0.0643532	1335743377049111	989320
ENSSSCG00000044700	2.88793e+16	30	2.37413e+08	6492246229693748	98020
ENSSSCG00000045465	2.71065e+16	60	1383031121478	3076096684222166	305380
ENSSSCG00000045516	3149710323597298	60	2.03686e+11	7384584355058683	90000
ENSSSCG00000045731	1626045271195491	60	124222267367883	6125046622361664	62530
ENSSSCG00000046054	3563193613045233	60	3.24991e+10	587613695942104	917800
ENSSSCG00000046239	2.86391e+16	60	7.11889e+10	5500558725487362	127240
ENSSSCG00000046335	5.78635e+16	60	1.22132e+06	5077803511743546	324020
ENSSSCG00000046579	5191280777547555	60	1.94164e+06	2834265746223716	499090
ENSSSCG00000046598	3016981848868597	60	3.53903e-46	27305426698586	1157050
ENSSSCG00000047219	3617590026919345	60	2.5479e+09	1.0188e+16	94660
ENSSSCG00000047605	1096351324569528	60	2.43044e-05	590258799755878	523570
H4C8	9183635219327568	60	0.125846	460764447253689	1252640
H2AW	3799746647046995	60	1.12464e+09	3975337577881802	280260
ENSSSCG00000048207	3306794920149111	60	1.01748e+11	5252490343806113	168050
ENSSSCG00000048603	3.00063e+16	60	7.93128e-47	1277432625984911	1438730
ENSSSCG00000050157	4989782532338486	60	4.92808e+06	3130692098611131	420500
ENSSSCG00000050424	1.48942e+16	60	210956515911952	1265647638471748	1280
ENSSSCG00000050501	2.0808e+16	60	19861331598751	821720211661918	29650
ENSSSCG00000051118	2.14079e+16	60	15492688450712	3151581546340909	271300
ENSSSCG00000051610	3501157125047791	60	4.28731e+09	1155433053923416	88740
eGFP_minus	1.38109e+16	60	3.00883e-280	2920226068426872	1276200

## Sheet: Sheet2
Sheet2: Differential expressed genes comparing lineages PEC-to-Beta,1 and PEC-to-Beta,0
Gene name	waldStat_2vs4	df_2vs4	pvalue_2vs4	abs(logFC)	transientScore
CNTN1	2341280618922233	60	6693767393789	1596392302685602	19610
SLC7A8	3706000639815945	60	1.71409e+09	1257665271942802	39040
TPD52L1	3907995693377348	60	6.90388e+08	4809324994135531	19330
HSPA5	2474081197065975	60	3813139938741	2082565531257937	13610
ATAD2	439990518240841	60	7.39529e+06	4165607014175075	23410
ENPP2	641161560223921	60	6535.46	1602935224691076	45460
SLC30A8	1.13725e+16	60	3.37867e-06	196817406325509	83250
SLC7A2	533375858450412	60	1.00325e+07	574902295452275	59530
RBFOX1	1.52551e+16	60	2.23424e-14	1187843611133375	70250
NCAPG	1.78498e+16	60	66188132463609	1079787940510315	27290
HSPH1	2826765211935161	60	8.36598e+10	2330886524740431	15760
TESC	1819939161415838	60	57527540761018	1024582525563823	28580
SERPIND1	1.99336e+16	60	28457484876039	549400153609327	1810
RET	653339069618886	60	3687.08	1465960751223662	50130
GAD2	3948132755513472	60	5.7592e+07	1804864133089565	31450
CHL1	1.32992e+16	60	3.01157e-10	283899902901106	83330
CADM2	8928831644367057	60	0.425831	28594139417137	74420
ROBO1	2829057523342914	60	8.28312e+10	2635151808770917	15370
ROBO2	1.23165e+16	60	3.52339e-09	724029100250111	71410
GRIA3	4255208179039151	60	1.43039e+08	201143890056638	62500
GALNT18	3687214084039415	60	1.86488e+09	2817315731311802	19210
MEF2C	9983457141128252	60	0.000271685	2.29085e+16	38480
FGL2	1300655026211756	60	1.24515e-10	2518804848932317	43570
VSTM2A	5728618916072556	60	159872	1.73079e+16	28180
DPP10	5181187761532158	60	2.03451e+07	109492010243148	52020
UNC5D	5.03175e+16	60	4.06002e+06	615948005760049	56360
DUSP4	2002805010272128	60	27377368579452	167610739047561	15650
GCG	2524177305073937	60	3079881046933	3451627949484902	8650
PDE4D	1949496908021881	60	34044627252202	174612019595337	46880
HMMR	2.07981e+16	60	1994250852361	6547512851233916	2600
ENSSSCG00000017032	1656219927245512	60	110343245920205	4978842059687945	1450
SGCD	2018215970459894	60	25700028372434	2428032984572826	7690
FAM20A	4903328231682968	60	7.34246e+06	1748708118696066	37700
PPY	6508729239859527	60	4140.48	240959765429065	71050
SGK1	4097145052179868	60	2.93341e+08	2795782437796362	23770
ENSSSCG00000023012	8334626028736832	60	0.726285	1901788667127399	47560
ENSSSCG00000023127	4849233006973171	60	9.42033e+06	1353901009524501	44200
ENSSSCG00000024009	2963035079745678	60	4.62064e+10	2239393612225269	19400
MID1IP1	2795317285819734	60	9.589e+09	190549896053577	53300
DNAJC3	1998684612771916	60	27843646807348	552319567406692	34640
B3GAT2	3.42713e+16	60	5.96259e+08	1313899648226864	35780
TMEM52	2682077367833421	60	1564410202313	1450198684904697	26120
ENSSSCG00000029160	2474547122005304	60	3805585524534	362186721201085	40410
FRMPD4	2.97688e+16	60	4.34918e+10	1460345118520251	30740
ENSSSCG00000031117	1.79131e+16	60	64530233726204	1392222833320813	20610
THY1	1.14631e+16	60	2.18185e-07	332132414260563	44570
ENSSSCG00000033363	2651945682650776	60	1781132394801	2101098592810855	15250
TUBB2B	2719495555146941	60	1331218766766	2267867517202181	14580
PLCXD3	2.30175e+16	60	7906259707173	216783134731173	43520
ST3GAL6	3782135947727895	60	1.2174e+10	1169577075821818	41810
RAB27B	2205183568157735	60	11849603181612	1481628924862815	2410
ENSSSCG00000035525	2.31441e+16	60	7496368332412	1917180274417591	14130
MCM6	1.74522e+16	60	77573919962194	2148635505850561	8500
MAD2L1	1772362988531519	60	69612795817158	707282844524213	30410
FABP3	7200813536253465	60	158.277	5576467184268737	35620
GADD45A	1.73804e+16	60	79823548607367	440085764677778	34850
PCP4	2.88401e+16	60	6.52248e+09	2035339076111094	21130
TK1	4572606830476979	60	3.35655e+08	5107146299654796	23300
C1QL1	2850898492980836	60	7.53322e+10	8390627609298675	10600
CER1	2984158333207232	60	4.213e+10	4312577654665095	14920
FLRT2	2493748492312623	60	3506755716507	152703304171176	21650
ENSSSCG00000041506	668472324222857	60	18086.6	3867151743660567	36200
ENSSSCG00000044111	2.77243e+16	60	1058869017947	1839649515931856	20090
ENSSSCG00000044664	3.61138e+16	60	2.61969e+10	1.30852e+16	14690
ENSSSCG00000045516	2077758959879248	60	20112440754155	2726164307642866	6530
ENSSSCG00000046579	2.49569e+16	60	3477870541479	3360532028994349	8530
ENSSSCG00000050703	2.30916e+16	60	7663656357989	8381124457953844	3380
eGFP_minus	6121268441958376	60	255145	2652759472604597	34450

## Sheet: Sheet3
Sheet3: Enriched pathways of gene cluster 1 for lineages NGN3-to-Beta,0 vs PEC-to-Beta,0
Gene_set	Term	Overlap	P-value	Adjusted P-value	Old P-value	Old Adjusted P-value	Odds Ratio	Combined Score	Genes	ratio	-log_adj_p
GO_Biological_Process_2021	negative regulation of protein processing	4/15	4.20902e-06	0.00305366	0	0	48.41	599.233	PRNP;SERPINE2;CTSZ;SERPINF2	0.266667	5.37582
GO_Biological_Process_2021	negative regulation of plasminogen activation	3/5	4.34066e-06	0.00305366	0	0	198.45	2450.36	SERPINE2;CTSZ;SERPINF2	0.6	5.36244
Reactome_2016	Hemostasis	15/552	2.27389e-05	0.00787946	0	0	3.90859	41.7884	SERPINE2;ITGA4;AHSG;HBE1;SERPINF2;ITGA1;HBB;GATA4;SLC3A2;TUBA4A;SLC7A8;FLNA;SCG3;KIF1A;PRKG1	0.0271739	4.64323
Reactome_2016	A tetrasaccharide linker sequence is required for GAG synthesis	4/26	4.31751e-05	0.00787946	0	0	24.1916	243.131	VCAN;B3GAT2;GPC5;GPC6	0.153846	4.36477
GO_Biological_Process_2021	regulation of neuron projection development	8/165	4.06445e-05	0.0190623	0	0	6.91939	69.9595	CAMK2B;CCDC88A;DPYSL3;APOE;KIF1A;PAK3;TOX;MT3	0.0484848	4.391
Reactome_2016	Axon guidance	13/515	0.000169529	0.0202717	0	0	3.57833	31.0688	CAMK2B;PRNP;TRPC5;DUSP1;ITGA1;RGMB;NFASC;ALCAM;DPYSL3;SCN9A;COL6A3;PAK3;PLXNA4	0.0252427	3.77076
Reactome_2016	Developmental Biology	16/786	0.000352376	0.0202717	0	0	2.89347	23.0054	CAMK2B;PRNP;CEBPA;TRPC5;PKLR;DUSP1;ITGA1;PAX6;RGMB;NFASC;ALCAM;DPYSL3;SCN9A;COL6A3;PAK3;PLXNA4	0.0203562	3.45299
Reactome_2016	Defective B3GALT6 causes EDSP2 and SEMDJL1	3/19	0.000388772	0.0202717	0	0	24.7888	194.654	VCAN;GPC5;GPC6	0.157895	3.4103
Reactome_2016	Defective B4GALT7 causes EDS, progeroid type	3/19	0.000388772	0.0202717	0	0	24.7888	194.654	VCAN;GPC5;GPC6	0.157895	3.4103
Reactome_2016	Defective B3GAT3 causes JDSSDHD	3/19	0.000388772	0.0202717	0	0	24.7888	194.654	VCAN;GPC5;GPC6	0.157895	3.4103
Reactome_2016	Chondroitin sulfate/dermatan sulfate metabolism	4/50	0.000576799	0.0263165	0	0	11.5559	86.1839	VCAN;B3GAT2;GPC5;GPC6	0.08	3.23898
Reactome_2016	Incretin synthesis, secretion, and inactivation	3/23	0.000694784	0.0281773	0	0	19.827	144.18	GCG;PAX6;GATA4	0.130435	3.15815
Reactome_2016	Heparan sulfate/heparin (HS-GAG) metabolism	4/54	0.000773543	0.0282343	0	0	10.6293	76.1537	VCAN;B3GAT2;GPC5;GPC6	0.0740741	3.11152
GO_Biological_Process_2021	regulation of plasminogen activation	3/12	9.18058e-05	0.0301487	0	0	44.0844	409.802	SERPINE2;CTSZ;SERPINF2	0.25	4.03713
GO_Biological_Process_2021	regulation of neuron apoptotic process	6/98	0.000107138	0.0301487	0	0	8.76442	80.119	PRNP;TOX3;GRM4;NUPR1;APOE;MT3	0.0612245	3.97006
GO_Biological_Process_2021	protein secretion	5/64	0.000130063	0.0304998	0	0	11.3307	101.382	RAB3B;RIMS2;RAB3C;ARL4D;GAL	0.078125	3.88585
Reactome_2016	Diseases associated with glycosaminoglycan metabolism	3/26	0.00100302	0.0332819	0	0	17.2383	119.026	VCAN;GPC5;GPC6	0.115385	2.99869
Reactome_2016	Platelet degranulation	5/105	0.00128187	0.0389903	0	0	6.67128	44.427	AHSG;SERPINF2;FLNA;SCG3;TUBA4A	0.047619	2.89216
Reactome_2016	Response to elevated platelet cytosolic Ca2+	5/110	0.00157603	0.0411794	0	0	6.35199	40.9885	AHSG;SERPINF2;FLNA;SCG3;TUBA4A	0.0454545	2.80244
Reactome_2016	ChREBP activates metabolic gene expression	2/8	0.00157948	0.0411794	0	0	43.7991	282.533	MLXIPL;PKLR	0.25	2.80148
Reactome_2016	Semaphorin interactions	4/67	0.00173626	0.0422489	0	0	8.43038	53.5837	DPYSL3;ITGA1;PAK3;PLXNA4	0.0597015	2.76039
GO_Biological_Process_2021	negative regulation of platelet activation	3/16	0.000228493	0.0459271	0	0	30.5138	255.828	SERPINE2;APOE;PRKG1	0.1875	3.64113
GO_Biological_Process_2021	positive regulation of glial cell differentiation	3/18	0.000329229	0.0550758	0	0	26.4427	212.037	SERPINE2;ID2;CXCR4	0.166667	3.4825
GO_Biological_Process_2021	cation transmembrane transport	4/44	0.000352297	0.0550758	0	0	13.2933	105.695	KCNJ11;KCNJ8;SLC7A8;SLC3A2	0.0909091	3.45309
GO_Biological_Process_2021	regulated exocytosis	7/180	0.000478519	0.0575546	0	0	5.45245	41.683	RIMS2;AHSG;SERPINF2;FLNA;SCG3;CPLX2;TUBA4A	0.0388889	3.3201
GO_Biological_Process_2021	hydrogen peroxide catabolic process	3/21	0.000527656	0.0575546	0	0	22.0322	166.279	HBZ;HBE1;HBB	0.142857	3.27765
GO_Biological_Process_2021	regulation of dendritic spine development	3/21	0.000527656	0.0575546	0	0	22.0322	166.279	CAMK2B;APOE;KIF1A	0.142857	3.27765
GO_Biological_Process_2021	negative regulation of cell projection organization	4/49	0.000533806	0.0575546	0	0	11.8133	89.0187	PRNP;DPYSL3;APOE;MT3	0.0816327	3.27262
GO_Biological_Process_2021	positive regulation of cardiac muscle contraction	2/5	0.000572682	0.0575546	0	0	87.6115	654.035	CHGA;RGS2	0.4	3.24209
GO_Biological_Process_2021	regulation of exocytosis	4/52	0.000670068	0.0610976	0	0	11.0733	80.9249	RAB3B;RIMS2;RAB3C;CPLX2	0.0769231	3.17388
GO_Biological_Process_2021	regulation of supramolecular fiber organization	3/23	0.000694784	0.0610976	0	0	19.827	144.18	MAP2;MAP1B;APOE	0.130435	3.15815
GO_Biological_Process_2021	negative regulation of cardiac muscle cell apoptotic process	2/6	0.00085471	0.0631972	0	0	65.7053	464.191	GATA4;NUPR1	0.333333	3.06818
GO_Biological_Process_2021	leucine transport	2/6	0.00085471	0.0631972	0	0	65.7053	464.191	SLC7A8;SLC3A2	0.333333	3.06818
GO_Biological_Process_2021	aromatic amino acid transport	2/6	0.00085471	0.0631972	0	0	65.7053	464.191	SLC7A8;SLC3A2	0.333333	3.06818
GO_Biological_Process_2021	positive regulation of cold-induced thermogenesis	5/97	0.000898325	0.0631972	0	0	7.25433	50.889	GATM;FABP5;GRB10;CXCR4;ELOVL6	0.0515464	3.04657
GO_Biological_Process_2021	regulation of secretion by cell	4/59	0.00108081	0.0634953	0	0	9.66052	65.9818	RAB3B;RIMS2;RAB3C;CPLX2	0.0677966	2.96625
GO_Biological_Process_2021	positive regulation of striated muscle contraction	2/7	0.00119059	0.0634953	0	0	52.5616	353.913	CHGA;RGS2	0.285714	2.92424
GO_Biological_Process_2021	skeletal system development	6/158	0.00137358	0.0634953	0	0	5.28867	34.8541	BMP3;VCAN;FRZB;AHSG;ZBTB16;SOX5	0.0379747	2.86215
GO_Biological_Process_2021	positive regulation of multicellular organismal process	9/345	0.00138102	0.0634953	0	0	3.62928	23.8985	GATM;FABP5;BAMBI;ZBTB16;GRB10;CXCR4;ELOVL6;APOE;SOX5	0.026087	2.8598
GO_Biological_Process_2021	negative regulation of endopeptidase activity	4/63	0.00138154	0.0634953	0	0	9.00375	59.2857	SERPINE2;AHSG;SERPINF2;MT3	0.0634921	2.85964
GO_Biological_Process_2021	regulation of neuronal synaptic plasticity	3/29	0.00138616	0.0634953	0	0	15.2469	100.343	CAMK2B;APOE;ZDHHC2	0.103448	2.85819
GO_Biological_Process_2021	hydrogen peroxide metabolic process	3/29	0.00138616	0.0634953	0	0	15.2469	100.343	HBZ;HBE1;HBB	0.103448	2.85819
GO_Biological_Process_2021	modulation of chemical synaptic transmission	5/109	0.00151358	0.0634953	0	0	6.4134	41.644	RIMS2;GRM4;GRM7;GRIK1;CPLX2	0.0458716	2.81999
GO_Biological_Process_2021	regulation of protein localization to membrane	3/30	0.00153159	0.0634953	0	0	14.6815	95.1572	GPC5;ZDHHC2;GPC6	0.1	2.81486
GO_Biological_Process_2021	regulation of long-term synaptic potentiation	3/30	0.00153159	0.0634953	0	0	14.6815	95.1572	SCGN;APOE;ZDHHC2	0.1	2.81486
GO_Biological_Process_2021	positive regulation of astrocyte differentiation	2/8	0.00157948	0.0634953	0	0	43.7991	282.533	SERPINE2;ID2	0.25	2.80148
GO_Biological_Process_2021	regulation of nitrogen compound metabolic process	2/8	0.00157948	0.0634953	0	0	43.7991	282.533	SELENOS;APOE	0.25	2.80148
GO_Biological_Process_2021	negative regulation of striated muscle cell apoptotic process	2/8	0.00157948	0.0634953	0	0	43.7991	282.533	GATA4;NUPR1	0.25	2.80148
GO_Biological_Process_2021	regulation of dendritic spine maintenance	2/8	0.00157948	0.0634953	0	0	43.7991	282.533	PRNP;APOE	0.25	2.80148
GO_Biological_Process_2021	negative regulation of glucose import	2/8	0.00157948	0.0634953	0	0	43.7991	282.533	SELENOS;GRB10	0.25	2.80148
GO_Biological_Process_2021	aminoglycan catabolic process	3/31	0.00168624	0.0659041	0	0	14.1564	90.3924	CHIA;GPC5;GPC6	0.0967742	2.77308
GO_Biological_Process_2021	positive regulation of metabolic process	5/113	0.00177475	0.0674884	0	0	6.17461	39.1106	GATM;FABP5;GRB10;CXCR4;ELOVL6	0.0442478	2.75086
GO_Biological_Process_2021	sterol catabolic process	2/9	0.00202058	0.0692621	0	0	37.5402	232.913	APOE;MT3	0.222222	2.69452
GO_Biological_Process_2021	cholesterol catabolic process	2/9	0.00202058	0.0692621	0	0	37.5402	232.913	APOE;MT3	0.222222	2.69452
GO_Biological_Process_2021	negative regulation of platelet aggregation	2/9	0.00202058	0.0692621	0	0	37.5402	232.913	SERPINE2;PRKG1	0.222222	2.69452
GO_Biological_Process_2021	carbohydrate homeostasis	4/70	0.00204058	0.0692621	0	0	8.04596	49.8409	CEBPA;MLXIPL;PAX6;GCG	0.0571429	2.69025
GO_Biological_Process_2021	positive regulation of cell projection organization	5/117	0.00206752	0.0692621	0	0	5.95288	36.7972	CAMK2B;DPYSL3;APOE;TOX;PLXNA4	0.042735	2.68455
KEGG_2021_Human	TGF-beta signaling pathway	5/94	0.000779279	0.070151	0	0	7.5	53.6786	BAMBI;ID2;ID4;ID3;RGMB	0.0531915	3.10831
KEGG_2021_Human	Signaling pathways regulating pluripotency of stem cells	6/143	0.000820479	0.070151	0	0	5.87219	41.7256	ID2;TCF7;ID4;ID3;LIFR;PAX6	0.041958	3.08593
GO_Biological_Process_2021	nervous system development	10/447	0.00236156	0.0716666	0	0	3.10605	18.7867	TRPC5;VCAN;NFASC;ZBTB16;SLITRK6;CXCR4;PAX6;GRIK1;ARHGAP26;LY6H	0.0223714	2.6268
GO_Biological_Process_2021	acylglycerol catabolic process	3/35	0.00240105	0.0716666	0	0	12.3844	74.7007	FABP1;FAAH;FABP5	0.0857143	2.6196
GO_Biological_Process_2021	positive regulation of vascular endothelial growth factor receptor signaling pathway	2/10	0.00251307	0.0716666	0	0	32.846	196.625	GRB10;MT3	0.2	2.5998
GO_Biological_Process_2021	cyclic-nucleotide-mediated signaling	3/36	0.00260475	0.0716666	0	0	12.0085	71.4555	RIMS2;GAL;APOE	0.0833333	2.58423
GO_Biological_Process_2021	cell morphogenesis involved in neuron differentiation	4/76	0.00275619	0.0716666	0	0	7.37323	43.4571	MAP2;MAP1B;SLITRK6;PAK3	0.0526316	2.55969
GO_Biological_Process_2021	platelet degranulation	5/125	0.00275667	0.0716666	0	0	5.55377	32.7324	AHSG;SERPINF2;FLNA;SCG3;TUBA4A	0.04	2.55962
GO_Biological_Process_2021	glutamate receptor signaling pathway	3/37	0.00281882	0.0716666	0	0	11.6547	68.4299	GRM4;GRM7;GRIK1	0.0810811	2.54993
GO_Biological_Process_2021	cholesterol metabolic process	4/77	0.00289016	0.0716666	0	0	7.27186	42.5145	HMGCS1;INSIG1;APOE;MT3	0.0519481	2.53908
GO_Biological_Process_2021	negative regulation of protein serine/threonine kinase activity	4/78	0.00302852	0.0716666	0	0	7.17323	41.6024	CEBPA;RGS2;DUSP1;APOE	0.0512821	2.51877
GO_Biological_Process_2021	regulation of axon extension	3/38	0.00304342	0.0716666	0	0	11.3211	65.6035	MAP2;APOE;MT3	0.0789474	2.51664
GO_Biological_Process_2021	alcohol catabolic process	2/11	0.00305615	0.0716666	0	0	29.195	169.057	APOE;MT3	0.181818	2.51483
GO_Biological_Process_2021	aminoglycan metabolic process	2/11	0.00305615	0.0716666	0	0	29.195	169.057	CHIA;B3GAT2	0.181818	2.51483
GO_Biological_Process_2021	fatty acid homeostasis	2/11	0.00305615	0.0716666	0	0	29.195	169.057	MLXIPL;APOE	0.181818	2.51483
GO_Biological_Process_2021	negative regulation of homotypic cell-cell adhesion	2/11	0.00305615	0.0716666	0	0	29.195	169.057	SERPINE2;PRKG1	0.181818	2.51483
GO_Biological_Process_2021	regulation of cardiac muscle cell apoptotic process	2/11	0.00305615	0.0716666	0	0	29.195	169.057	GATA4;NUPR1	0.181818	2.51483
GO_Biological_Process_2021	negative regulation of protein maturation	2/11	0.00305615	0.0716666	0	0	29.195	169.057	PRNP;SERPINE2	0.181818	2.51483
GO_Biological_Process_2021	columnar/cuboidal epithelial cell differentiation	2/11	0.00305615	0.0716666	0	0	29.195	169.057	GATA4;ROS1	0.181818	2.51483
GO_Biological_Process_2021	positive regulation of chondrocyte differentiation	2/11	0.00305615	0.0716666	0	0	29.195	169.057	ZBTB16;SOX5	0.181818	2.51483
GO_Biological_Process_2021	axon development	4/79	0.00317134	0.0720805	0	0	7.07723	40.7195	GRM7;MAP1B;SLITRK6;PAK3	0.0506329	2.49876
GO_Biological_Process_2021	regulation of primary metabolic process	5/130	0.00326387	0.0720805	0	0	5.33027	30.515	FABP1;HMGCS1;ID2;ELOVL6;APOE	0.0384615	2.48627
GO_Biological_Process_2021	negative regulation of secretion by cell	3/39	0.00327872	0.0720805	0	0	11.0061	62.9583	CHGA;GRM7;APOE	0.0769231	2.4843
GO_Biological_Process_2021	negative regulation of protein secretion	3/39	0.00327872	0.0720805	0	0	11.0061	62.9583	CHGA;KCNJ11;APOE	0.0769231	2.4843
GO_Biological_Process_2021	negative regulation of blood coagulation	3/40	0.00352487	0.0723122	0	0	10.7081	60.4785	SERPINE2;SERPINF2;APOE	0.075	2.45286
GO_Biological_Process_2021	actin crosslink formation	2/12	0.00364902	0.0723122	0	0	26.2742	147.485	DPYSL3;FLNA	0.166667	2.43782
GO_Biological_Process_2021	negative regulation of hemostasis	2/12	0.00364902	0.0723122	0	0	26.2742	147.485	SERPINE2;APOE	0.166667	2.43782
GO_Biological_Process_2021	regulation of amyloid precursor protein catabolic process	2/12	0.00364902	0.0723122	0	0	26.2742	147.485	PRNP;APOE	0.166667	2.43782
GO_Biological_Process_2021	inorganic ion transmembrane transport	2/12	0.00364902	0.0723122	0	0	26.2742	147.485	KCNJ11;KCNJ8	0.166667	2.43782
GO_Biological_Process_2021	negative regulation of glucose transmembrane transport	2/12	0.00364902	0.0723122	0	0	26.2742	147.485	SELENOS;GRB10	0.166667	2.43782
GO_Biological_Process_2021	regulation of astrocyte differentiation	2/12	0.00364902	0.0723122	0	0	26.2742	147.485	SERPINE2;ID2	0.166667	2.43782
GO_Biological_Process_2021	positive regulation of cell differentiation	7/258	0.00376881	0.0736488	0	0	3.74316	20.8906	ZEB1;BAMBI;FRZB;ZBTB16;ID2;SERPINF2;SOX5	0.0271318	2.4238
Reactome_2016	Peptide hormone metabolism	4/81	0.00347062	0.073994	0	0	6.8927	39.0363	CTSZ;PAX6;GATA4;GCG	0.0493827	2.45959
Reactome_2016	Defective EXT1 causes exostoses 1, TRPS2 and CHDS	2/12	0.00364902	0.073994	0	0	26.2742	147.485	GPC5;GPC6	0.166667	2.43782
Reactome_2016	Defective EXT2 causes exostoses 2	2/12	0.00364902	0.073994	0	0	26.2742	147.485	GPC5;GPC6	0.166667	2.43782
Reactome_2016	Retinoid metabolism and transport	3/42	0.00405034	0.0745799	0	0	10.1579	55.9597	GPC5;APOE;GPC6	0.0714286	2.39251
Reactome_2016	Synthesis, secretion, and inactivation of Glucose-dependent Insulinotropic Polypeptide (GIP)	2/13	0.0042909	0.0745799	0	0	23.8844	130.2	PAX6;GATA4	0.153846	2.36745
Reactome_2016	Dissolution of Fibrin Clot	2/13	0.0042909	0.0745799	0	0	23.8844	130.2	SERPINE2;SERPINF2	0.153846	2.36745
GO_Biological_Process_2021	protein localization to plasma membrane	5/136	0.00395739	0.0762746	0	0	5.08459	28.1288	RAB3B;RAB3C;CCDC88A;FLNA;ZDHHC2	0.0367647	2.40259
Reactome_2016	Diseases of glycosylation	4/88	0.00466852	0.0774551	0	0	6.31608	33.8978	VCAN;ADAMTS19;GPC5;GPC6	0.0454545	2.33082
GO_Biological_Process_2021	negative regulation of apoptotic process	10/485	0.00421297	0.0775946	0	0	2.85197	15.5991	FABP1;TOX3;EGR3;FLNA;ASNS;GCG;GATA4;NUPR1;APOE;MT3	0.0206186	2.37541
GO_Biological_Process_2021	relaxation of cardiac muscle	2/13	0.0042909	0.0775946	0	0	23.8844	130.2	CHGA;RGS2	0.153846	2.36745
GO_Biological_Process_2021	transport across blood-brain barrier	4/86	0.00430162	0.0775946	0	0	6.47078	35.2578	SLC7A8;KCNJ8;FABP5;SLCO3A1	0.0465116	2.36637
GO_Biological_Process_2021	glucose homeostasis	4/86	0.00430162	0.0775946	0	0	6.47078	35.2578	CEBPA;MLXIPL;PAX6;GCG	0.0465116	2.36637
GO_Biological_Process_2021	regulation of neuron death	4/86	0.00430162	0.0775946	0	0	6.47078	35.2578	CHGA;PRNP;GRM4;CTSZ	0.0465116	2.36637
GO_Biological_Process_2021	neuron projection morphogenesis	5/140	0.00447462	0.0796936	0	0	4.93293	26.6839	ALCAM;MAP2;MAP1B;SLITRK6;PAK3	0.0357143	2.34924
GO_Biological_Process_2021	neurotransmitter secretion	3/44	0.004621	0.080105	0	0	9.66146	51.9511	RIMS2;GRM4;CPLX2	0.0681818	2.33526
GO_Biological_Process_2021	positive regulation of biosynthetic process	3/44	0.004621	0.080105	0	0	9.66146	51.9511	MLXIPL;SERPINF2;APOE	0.0681818	2.33526
GO_Biological_Process_2021	positive regulation of neuron projection development	4/88	0.00466852	0.080105	0	0	6.31608	33.8978	CAMK2B;DPYSL3;APOE;TOX	0.0454545	2.33082
GO_Biological_Process_2021	negative regulation of DNA-binding transcription factor activity	5/143	0.00489292	0.0814918	0	0	4.82496	25.6686	PRNP;ID2;ID3;FLNA;NUPR1	0.034965	2.31043
GO_Biological_Process_2021	amino acid transmembrane transport	3/45	0.00492362	0.0814918	0	0	9.43095	50.1134	SLC7A8;SLC38A11;SLC3A2	0.0666667	2.30772
GO_Biological_Process_2021	negative regulation of coagulation	2/14	0.00498102	0.0814918	0	0	21.8929	116.079	SERPINE2;APOE	0.142857	2.30268
GO_Biological_Process_2021	neuron fate commitment	2/14	0.00498102	0.0814918	0	0	21.8929	116.079	ID2;PAX6	0.142857	2.30268
GO_Biological_Process_2021	post-translational protein modification	8/345	0.00514927	0.0818863	0	0	3.19411	16.8294	FBXW4;VCAN;AHSG;ZBTB16;ASB13;SCG3;APOE;AFP	0.0231884	2.28825
GO_Biological_Process_2021	regulation of cellular protein localization	3/46	0.00523793	0.0818863	0	0	9.21116	48.3754	MAP2;GPC5;GPC6	0.0652174	2.28084
GO_Biological_Process_2021	establishment of protein localization to extracellular region	3/46	0.00523793	0.0818863	0	0	9.21116	48.3754	RAB3B;RAB3C;ARL4D	0.0652174	2.28084
GO_Biological_Process_2021	regulation of synaptic transmission, glutamatergic	3/46	0.00523793	0.0818863	0	0	9.21116	48.3754	GRM4;GRM7;GRIK1	0.0652174	2.28084
GO_Biological_Process_2021	regulation of lipid metabolic process	4/92	0.00546431	0.0844867	0	0	6.02776	31.4017	FABP1;HMGCS1;ID2;ELOVL6	0.0434783	2.26246
GO_Biological_Process_2021	endoderm development	2/15	0.00571861	0.0855967	0	0	20.2078	104.354	DUSP1;GATA4	0.133333	2.24271
GO_Biological_Process_2021	protein kinase A signaling	2/15	0.00571861	0.0855967	0	0	20.2078	104.354	GAL;GCG	0.133333	2.24271
GO_Biological_Process_2021	G protein-coupled glutamate receptor signaling pathway	2/15	0.00571861	0.0855967	0	0	20.2078	104.354	GRM4;GRM7	0.133333	2.24271
GO_Biological_Process_2021	negative regulation of MAP kinase activity	3/48	0.00590212	0.0866734	0	0	8.80089	45.1701	RGS2;DUSP1;APOE	0.0625	2.22899
GO_Biological_Process_2021	regulation of cell population proliferation	13/764	0.00591375	0.0866734	0	0	2.36112	12.1137	PTGFR;CEBPA;ITGA1;TGFA;LIFR;SSTR1;CCDC88A;MLXIPL;BAMBI;FRZB;ID2;NUPR1;JUNB	0.0170157	2.22814
Reactome_2016	Metabolism of carbohydrates	7/282	0.00608435	0.0879098	0	0	3.4123	17.4097	CHIA;VCAN;PKLR;B3GAT2;SORD;GPC5;GPC6	0.0248227	2.21579
Reactome_2016	Chaperonin-mediated protein folding	4/95	0.00611734	0.0879098	0	0	5.82816	29.704	FBXW4;GNAO1;RGS6;TUBA4A	0.0421053	2.21344
Reactome_2016	L1CAM interactions	4/96	0.00634604	0.0879098	0	0	5.76452	29.168	NFASC;ALCAM;SCN9A;ITGA1	0.0416667	2.1975
Reactome_2016	Sema3A PAK dependent Axon repulsion	2/16	0.00650292	0.0879098	0	0	18.7635	94.4836	PAK3;PLXNA4	0.125	2.18689
Reactome_2016	CRMPs in Sema3A signaling	2/16	0.00650292	0.0879098	0	0	18.7635	94.4836	DPYSL3;PLXNA4	0.125	2.18689
Reactome_2016	Metabolism of fat-soluble vitamins	3/51	0.00698901	0.0911068	0	0	8.24958	40.9461	GPC5;APOE;GPC6	0.0588235	2.15558
GO_Biological_Process_2021	regulation of vesicle-mediated transport	4/96	0.00634604	0.0920503	0	0	5.76452	29.168	RAB3B;RIMS2;RAB3C;CPLX2	0.0416667	2.1975
GO_Biological_Process_2021	regulation of oxidative phosphorylation	2/16	0.00650292	0.0930659	0	0	18.7635	94.4836	MLXIPL;NUPR1	0.125	2.18689
GO_Biological_Process_2021	regulation of MAP kinase activity	4/97	0.00658035	0.0930659	0	0	5.70224	28.6462	RGS2;DUSP1;APOE;TPD52L1	0.0412371	2.18175
GO_Biological_Process_2021	amino acid transport	3/50	0.00661449	0.0930659	0	0	8.42553	42.2835	SLC7A8;SLC38A11;SLC3A2	0.06	2.1795
GO_Biological_Process_2021	negative regulation of neuron death	4/98	0.00682033	0.095012	0	0	5.6413	28.1379	CHGA;TOX3;APOE;MT3	0.0408163	2.16619
Reactome_2016	Protein folding	4/101	0.00757484	0.0953386	0	0	5.46599	26.69	FBXW4;GNAO1;RGS6;TUBA4A	0.039604	2.12063
GO_Biological_Process_2021	positive regulation of fat cell differentiation	3/51	0.00698901	0.0964073	0	0	8.24958	40.9461	FRZB;ZBTB16;ID2	0.0588235	2.15558
GO_Biological_Process_2021	negative regulation of ATP metabolic process	2/17	0.00733319	0.0969895	0	0	17.5117	86.076	MLXIPL;NUPR1	0.117647	2.13471
GO_Biological_Process_2021	positive regulation of stem cell differentiation	2/17	0.00733319	0.0969895	0	0	17.5117	86.076	GATA4;SOX5	0.117647	2.13471
GO_Biological_Process_2021	negative regulation of amyloid-beta formation	2/17	0.00733319	0.0969895	0	0	17.5117	86.076	PRNP;APOE	0.117647	2.13471
GO_Biological_Process_2021	negative regulation of insulin secretion	2/17	0.00733319	0.0969895	0	0	17.5117	86.076	CHGA;KCNJ11	0.117647	2.13471
GO_Biological_Process_2021	negative regulation of protein metabolic process	3/52	0.00737589	0.0969895	0	0	8.08082	39.6731	PRNP;FLNA;APOE	0.0576923	2.13219
Reactome_2016	Metabolism of proteins	16/1074	0.00821824	0.0999886	0	0	2.07404	9.9583	FBXW4;PGAP1;KLK1;CTSZ;ASNS;TGFA;GCG;GATA4;PAX6;ZDHHC2;TUBA4A;GNAO1;MGAT4C;ADAMTS19;ST6GALNAC5;RGS6	0.0148976	2.08522
Reactome_2016	Regulation of cholesterol biosynthesis by SREBP (SREBF)	3/55	0.00861157	0.100834	0	0	7.61346	36.1993	HMGCS1;INSIG1;ELOVL6	0.0545455	2.06492
Reactome_2016	Other semaphorin interactions	2/19	0.00912868	0.100834	0	0	15.4499	72.5581	ITGA1;PLXNA4	0.105263	2.03959
Reactome_2016	Regulation of gene expression in beta cells	2/20	0.0100924	0.100834	0	0	14.5909	67.0592	PKLR;PAX6	0.1	1.996
Reactome_2016	Synthesis, secretion, and inactivation of Glucagon-like Peptide-1 (GLP-1)	2/20	0.0100924	0.100834	0	0	14.5909	67.0592	GCG;PAX6	0.1	1.996
Reactome_2016	Hormone-sensitive lipase (HSL)-mediated triacylglycerol hydrolysis	2/20	0.0100924	0.100834	0	0	14.5909	67.0592	FABP1;FABP5	0.1	1.996
Reactome_2016	Integration of energy metabolism	4/110	0.0101622	0.100834	0	0	4.99962	22.9437	MLXIPL;KCNJ11;PKLR;GCG	0.0363636	1.99301
Reactome_2016	Metabolism	24/1908	0.0103054	0.100834	0	0	1.77386	8.11557	CHIA;FAAH;KCNJ11;HMGCS1;PKLR;B3GAT2;INSIG1;SORD;ASNS;HBB;GCG;ELOVL6;MT3;FABP1;MLXIPL;GLUD1;VCAN;GATM;FABP5;DPEP2;CHAC2;GPC5;APOE;GPC6	0.0125786	1.98694
Reactome_2016	G alpha (i) signalling events	6/240	0.0104978	0.100834	0	0	3.42107	15.5884	GAL;GRM4;GRM7;CXCR4;SSTR1;RGS6	0.025	1.9789
Reactome_2016	RHO GTPases activate PAKs	2/21	0.0110993	0.101281	0	0	13.8222	62.2122	FLNA;PAK3	0.0952381	1.95471
Reactome_2016	HS-GAG degradation	2/21	0.0110993	0.101281	0	0	13.8222	62.2122	GPC5;GPC6	0.0952381	1.95471
Reactome_2016	Ca2+ pathway	3/61	0.0114279	0.101736	0	0	6.82379	30.514	GNAO1;TCF7;PRKG1	0.0491803	1.94203
GO_Biological_Process_2021	glycosaminoglycan metabolic process	3/54	0.00818708	0.103122	0	0	7.76314	37.3034	B3GAT2;GPC5;GPC6	0.0555556	2.08687
GO_Biological_Process_2021	regulation of cartilage development	2/18	0.00820869	0.103122	0	0	16.4164	78.8407	ZBTB16;SOX5	0.111111	2.08573
GO_Biological_Process_2021	negative regulation of peptide hormone secretion	2/18	0.00820869	0.103122	0	0	16.4164	78.8407	CHGA;KCNJ11	0.111111	2.08573
GO_Biological_Process_2021	regulation of platelet aggregation	2/18	0.00820869	0.103122	0	0	16.4164	78.8407	SERPINE2;PRKG1	0.111111	2.08573
GO_Biological_Process_2021	positive regulation of cartilage development	2/18	0.00820869	0.103122	0	0	16.4164	78.8407	ZBTB16;SOX5	0.111111	2.08573
GO_Biological_Process_2021	regulation of insulin secretion	4/104	0.00838237	0.104372	0	0	5.30121	25.3484	CHGA;GLUD1;KCNJ11;GCG	0.0384615	2.07663
GO_Biological_Process_2021	triglyceride metabolic process	3/55	0.00861157	0.106285	0	0	7.61346	36.1993	FABP1;FABP5;APOE	0.0545455	2.06492
GO_Biological_Process_2021	cellular response to peptide hormone stimulus	4/106	0.00895089	0.107933	0	0	5.19674	24.5078	SELENOS;PKLR;INSIG1;GCG	0.0377358	2.04813
GO_Biological_Process_2021	glycosaminoglycan catabolic process	3/56	0.00904876	0.107933	0	0	7.46943	35.1446	VCAN;GPC5;GPC6	0.0535714	2.04341
GO_Biological_Process_2021	cellular response to copper ion	2/19	0.00912868	0.107933	0	0	15.4499	72.5581	PRNP;MT3	0.105263	2.03959
GO_Biological_Process_2021	long-term memory	2/19	0.00912868	0.107933	0	0	15.4499	72.5581	PRNP;APOE	0.105263	2.03959
GO_Biological_Process_2021	negative regulation of amyloid precursor protein catabolic process	2/19	0.00912868	0.107933	0	0	15.4499	72.5581	PRNP;APOE	0.105263	2.03959
GO_Biological_Process_2021	regulation of mitotic nuclear division	3/57	0.00949874	0.111373	0	0	7.33074	34.1363	DUSP1;TGFA;CDC25C	0.0526316	2.02233
GO_Biological_Process_2021	negative regulation of neuron projection development	3/58	0.00996157	0.113601	0	0	7.19709	33.1715	DPYSL3;APOE;MT3	0.0517241	2.00167
GO_Biological_Process_2021	cellular modified amino acid biosynthetic process	2/20	0.0100924	0.113601	0	0	14.5909	67.0592	GATM;CHAC2	0.1	1.996
GO_Biological_Process_2021	fatty acid transport	2/20	0.0100924	0.113601	0	0	14.5909	67.0592	FABP5;APOE	0.1	1.996
GO_Biological_Process_2021	positive regulation of heart contraction	2/20	0.0100924	0.113601	0	0	14.5909	67.0592	CHGA;RGS2	0.1	1.996
GO_Biological_Process_2021	insulin secretion	2/20	0.0100924	0.113601	0	0	14.5909	67.0592	RIMS2;GAL	0.1	1.996
Reactome_2016	Glycosaminoglycan metabolism	4/121	0.0140256	0.121889	0	0	4.52705	19.3163	VCAN;B3GAT2;GPC5;GPC6	0.0330579	1.85308
GO_Biological_Process_2021	adenylate cyclase-inhibiting G protein-coupled receptor signaling pathway	3/60	0.0109261	0.122008	0	0	6.94386	31.3627	GRM4;GRM7;FLNA	0.05	1.96154
GO_Biological_Process_2021	calcium-mediated signaling using intracellular calcium source	2/21	0.0110993	0.122966	0	0	13.8222	62.2122	PRNP;PTGFR	0.0952381	1.95471
Reactome_2016	Amino acid synthesis and interconversion (transamination)	2/25	0.0155431	0.128937	0	0	11.4161	47.5381	GLUD1;ASNS	0.08	1.80846
Reactome_2016	Basigin interactions	2/25	0.0155431	0.128937	0	0	11.4161	47.5381	SLC7A8;SLC3A2	0.08	1.80846
GO_Biological_Process_2021	positive regulation of developmental process	5/177	0.0117366	0.129011	0	0	3.86451	17.1779	CAMK2B;ZBTB16;SERPINF2;APOE;SOX5	0.0282486	1.93046
GO_Biological_Process_2021	cellular response to cytokine stimulus	9/482	0.0120088	0.13048	0	0	2.55999	11.3206	CEBPA;ZEB1;DUSP1;DPYSL3;TCF7;GRB10;CXCR4;LIFR;JUNB	0.0186722	1.9205
GO_Biological_Process_2021	cellular protein modification process	15/1025	0.0120956	0.13048	0	0	2.02723	8.95003	FBXW4;CAMK2B;PGAP1;DUSP1;AHSG;ZBTB16;ASB13;AFP;MT3;VCAN;SCG3;APOE;PAK3;ROS1;PRKG1	0.0146341	1.91737
GO_Biological_Process_2021	positive regulation of dendritic spine development	2/22	0.0121484	0.13048	0	0	13.1305	57.9126	CAMK2B;APOE	0.0909091	1.91548
GO_Biological_Process_2021	negative regulation of peptidase activity	3/63	0.0124708	0.132928	0	0	6.59567	28.9178	SERPINE2;AHSG;SERPINF2	0.047619	1.9041
GO_Biological_Process_2021	lipid homeostasis	3/64	0.0130121	0.134983	0	0	6.48721	28.1667	CEBPA;MLXIPL;APOE	0.046875	1.88565
GO_Biological_Process_2021	diterpenoid metabolic process	3/64	0.0130121	0.134983	0	0	6.48721	28.1667	GPC5;APOE;GPC6	0.046875	1.88565
GO_Biological_Process_2021	triglyceride catabolic process	2/23	0.0132393	0.134983	0	0	12.5046	54.0769	FABP1;FABP5	0.0869565	1.87814
GO_Biological_Process_2021	response to copper ion	2/23	0.0132393	0.134983	0	0	12.5046	54.0769	PRNP;MT3	0.0869565	1.87814
GO_Biological_Process_2021	regulation of neural precursor cell proliferation	2/23	0.0132393	0.134983	0	0	12.5046	54.0769	ID2;TOX	0.0869565	1.87814
GO_Biological_Process_2021	cytoskeleton-dependent intracellular transport	2/23	0.0132393	0.134983	0	0	12.5046	54.0769	CCDC88A;KIF1A	0.0869565	1.87814
Reactome_2016	Lipid digestion, mobilization, and transport	3/71	0.0171744	0.139101	0	0	5.81735	23.6437	FABP1;FABP5;APOE	0.0422535	1.76512
Reactome_2016	Muscle contraction	5/196	0.0175306	0.139101	0	0	3.47672	14.0592	CAMK2B;KCNJ11;SCN9A;ITGA1;GATA4	0.0255102	1.7562
GO_Biological_Process_2021	positive regulation of cell death	3/66	0.0141345	0.141399	0	0	6.28063	26.7501	PRNP;HBB;MT3	0.0454545	1.84972
GO_Biological_Process_2021	amino acid import across plasma membrane	2/24	0.0143711	0.141399	0	0	11.9356	50.6372	SLC7A8;SLC3A2	0.0833333	1.84251
GO_Biological_Process_2021	axon extension	2/24	0.0143711	0.141399	0	0	11.9356	50.6372	ALCAM;MAP1B	0.0833333	1.84251
GO_Biological_Process_2021	regulation of vascular endothelial growth factor receptor signaling pathway	2/24	0.0143711	0.141399	0	0	11.9356	50.6372	GRB10;MT3	0.0833333	1.84251
GO_Biological_Process_2021	positive regulation of neuron apoptotic process	2/24	0.0143711	0.141399	0	0	11.9356	50.6372	PRNP;NUPR1	0.0833333	1.84251
GO_Biological_Process_2021	regulation of epidermal growth factor receptor signaling pathway	3/67	0.0147156	0.143784	0	0	6.18219	26.0817	CCDC88A;ITGA1;TGFA	0.0447761	1.83222
GO_Biological_Process_2021	regulation of protein processing	2/25	0.0155431	0.147765	0	0	11.4161	47.5381	PRNP;SERPINE2	0.08	1.80846
GO_Biological_Process_2021	cAMP-mediated signaling	2/25	0.0155431	0.147765	0	0	11.4161	47.5381	RIMS2;GAL	0.08	1.80846
GO_Biological_Process_2021	positive regulation of lipid metabolic process	2/25	0.0155431	0.147765	0	0	11.4161	47.5381	MLXIPL;APOE	0.08	1.80846
GO_Biological_Process_2021	acylglycerol homeostasis	2/25	0.0155431	0.147765	0	0	11.4161	47.5381	MLXIPL;APOE	0.08	1.80846
Reactome_2016	Cardiac conduction	4/135	0.0201411	0.156415	0	0	4.04037	15.7776	CAMK2B;KCNJ11;SCN9A;GATA4	0.0296296	1.69592
Reactome_2016	Interaction between L1 and Ankyrins	2/29	0.0206209	0.156805	0	0	9.72284	37.7387	NFASC;SCN9A	0.0689655	1.68569
GO_Biological_Process_2021	regulation of chondrocyte differentiation	2/26	0.0167548	0.157352	0	0	10.9398	44.7338	ZBTB16;SOX5	0.0769231	1.77586
GO_Biological_Process_2021	positive regulation of nucleic acid-templated transcription	9/511	0.0169653	0.157352	0	0	2.40849	9.81842	MLXIPL;BAMBI;ZBTB16;ID2;GATA4;PAX6;APOE;RGMB;MT3	0.0176125	1.77044
GO_Biological_Process_2021	negative regulation of neuron apoptotic process	3/71	0.0171744	0.157352	0	0	5.81735	23.6437	TOX3;APOE;MT3	0.0422535	1.76512
GO_Biological_Process_2021	regulation of endopeptidase activity	3/71	0.0171744	0.157352	0	0	5.81735	23.6437	SERPINE2;AHSG;SERPINF2	0.0422535	1.76512
GO_Biological_Process_2021	protein localization to membrane	5/195	0.0171862	0.157352	0	0	3.4952	14.2033	RAB3B;RAB3C;ITGA4;FLNA;ZDHHC2	0.025641	1.76482
GO_Biological_Process_2021	cellular response to insulin stimulus	4/129	0.0173503	0.157352	0	0	4.2356	17.1717	SELENOS;PKLR;INSIG1;GRB10	0.0310078	1.76069
GO_Biological_Process_2021	chondroitin sulfate proteoglycan biosynthetic process	2/27	0.0180054	0.157352	0	0	10.5017	42.1863	VCAN;B3GAT2	0.0740741	1.7446
GO_Biological_Process_2021	dendritic spine organization	2/27	0.0180054	0.157352	0	0	10.5017	42.1863	PRNP;PAK3	0.0740741	1.7446
GO_Biological_Process_2021	peptide hormone secretion	2/27	0.0180054	0.157352	0	0	10.5017	42.1863	RIMS2;GAL	0.0740741	1.7446
GO_Biological_Process_2021	L-alpha-amino acid transmembrane transport	2/27	0.0180054	0.157352	0	0	10.5017	42.1863	SLC7A8;SLC3A2	0.0740741	1.7446
GO_Biological_Process_2021	cellular lipid catabolic process	2/27	0.0180054	0.157352	0	0	10.5017	42.1863	FAAH;MT3	0.0740741	1.7446
GO_Biological_Process_2021	negative regulation of insulin receptor signaling pathway	2/27	0.0180054	0.157352	0	0	10.5017	42.1863	AHSG;GRB10	0.0740741	1.7446
GO_Biological_Process_2021	regulation of blood coagulation	2/27	0.0180054	0.157352	0	0	10.5017	42.1863	SERPINE2;APOE	0.0740741	1.7446
GO_Biological_Process_2021	positive regulation of MAPK cascade	6/274	0.019014	0.158755	0	0	2.98188	11.8159	GRM4;SERPINF2;GATA4;APOE;TPD52L1;MT3	0.0218978	1.72093
GO_Biological_Process_2021	positive regulation of transcription, DNA-templated	16/1183	0.0191102	0.158755	0	0	1.86941	7.39827	CEBPA;ONECUT2;ZBTB16;SERPINF2;GATA4;PAX6;RGMB;MT3;H1-3;MLXIPL;TOX3;GAL;BAMBI;ID2;APOE;JUNB	0.0135249	1.71873
GO_Biological_Process_2021	negative regulation of protein binding	3/74	0.0191599	0.158755	0	0	5.5707	22.0318	ITGA4;MAP2;CTSZ	0.0405405	1.71761
GO_Biological_Process_2021	regulation of cell adhesion	4/133	0.019182	0.158755	0	0	4.10343	16.2241	DUSP1;CXCR4;ZDHHC2;PLXNA4	0.0300752	1.71711
GO_Biological_Process_2021	L-amino acid transport	2/28	0.0192943	0.158755	0	0	10.0973	39.8636	SLC7A8;SLC3A2	0.0714286	1.71457
GO_Biological_Process_2021	negative regulation of axonogenesis	2/28	0.0192943	0.158755	0	0	10.0973	39.8636	MAP2;MT3	0.0714286	1.71457
GO_Biological_Process_2021	neutral amino acid transport	2/28	0.0192943	0.158755	0	0	10.0973	39.8636	SLC7A8;SLC3A2	0.0714286	1.71457
GO_Biological_Process_2021	regulation of microtubule polymerization or depolymerization	2/28	0.0192943	0.158755	0	0	10.0973	39.8636	MAP2;MAP1B	0.0714286	1.71457
GO_Biological_Process_2021	negative regulation of cellular response to insulin stimulus	2/28	0.0192943	0.158755	0	0	10.0973	39.8636	AHSG;GRB10	0.0714286	1.71457
GO_Biological_Process_2021	receptor clustering	2/28	0.0192943	0.158755	0	0	10.0973	39.8636	ITGA4;FLNA	0.0714286	1.71457
Reactome_2016	GPCR ligand binding	8/447	0.0218727	0.161043	0	0	2.43915	9.32369	PTGFR;GAL;GRM4;GRM7;PRLHR;CXCR4;GCG;SSTR1	0.0178971	1.6601
Reactome_2016	Factors involved in megakaryocyte development and platelet production	4/141	0.0231935	0.161043	0	0	3.86224	14.537	HBE1;HBB;GATA4;KIF1A	0.0283688	1.63463
Reactome_2016	Inwardly rectifying K+ channels	2/31	0.0233843	0.161043	0	0	9.05138	33.9942	KCNJ8;KCNJ11	0.0645161	1.63108
Reactome_2016	Amino acid transport across the plasma membrane	2/31	0.0233843	0.161043	0	0	9.05138	33.9942	SLC7A8;SLC3A2	0.0645161	1.63108
Reactome_2016	HS-GAG biosynthesis	2/31	0.0233843	0.161043	0	0	9.05138	33.9942	GPC5;GPC6	0.0645161	1.63108
Reactome_2016	Regulation of beta-cell development	2/32	0.0248199	0.167764	0	0	8.74923	32.3381	PKLR;PAX6	0.0625	1.6052
GO_Biological_Process_2021	negative regulation of wound healing	2/29	0.0206209	0.168684	0	0	9.72284	37.7387	SERPINE2;APOE	0.0689655	1.68569
Reactome_2016	Cargo concentration in the ER	2/33	0.0262906	0.174474	0	0	8.46657	30.806	CTSZ;TGFA	0.0606061	1.5802
GO_Biological_Process_2021	positive regulation of cellular process	10/625	0.0221224	0.17992	0	0	2.18682	8.33434	MLXIPL;PTGFR;BAMBI;AHSG;SERPINF2;HBB;TGFA;LIFR;NUPR1;MT3	0.016	1.65517
GO_Biological_Process_2021	protein localization to cell periphery	4/140	0.0226664	0.183285	0	0	3.89084	14.7341	RAB3B;RAB3C;FLNA;ZDHHC2	0.0285714	1.64462
GO_Biological_Process_2021	negative regulation of axon extension	2/31	0.0233843	0.184691	0	0	9.05138	33.9942	MAP2;MT3	0.0645161	1.63108
GO_Biological_Process_2021	activation of protein kinase B activity	2/31	0.0233843	0.184691	0	0	9.05138	33.9942	CCDC88A;MT3	0.0645161	1.63108
GO_Biological_Process_2021	triglyceride homeostasis	2/31	0.0233843	0.184691	0	0	9.05138	33.9942	MLXIPL;APOE	0.0645161	1.63108
GO_Biological_Process_2021	negative regulation of cell cycle	3/80	0.0234965	0.184691	0	0	5.13506	19.2611	CEBPA;DUSP1;NUPR1	0.0375	1.629
GO_Biological_Process_2021	regulation of fat cell differentiation	3/80	0.0234965	0.184691	0	0	5.13506	19.2611	FRZB;ZBTB16;ID2	0.0375	1.629
GO_Biological_Process_2021	long-chain fatty acid transport	2/32	0.0248199	0.191555	0	0	8.74923	32.3381	FABP5;APOE	0.0625	1.6052
GO_Biological_Process_2021	regulation of dendritic spine morphogenesis	2/32	0.0248199	0.191555	0	0	8.74923	32.3381	CAMK2B;KIF1A	0.0625	1.6052
GO_Biological_Process_2021	negative regulation of developmental growth	2/32	0.0248199	0.191555	0	0	8.74923	32.3381	MAP2;MT3	0.0625	1.6052
GO_Biological_Process_2021	negative regulation of cellular macromolecule biosynthetic process	9/547	0.0250281	0.191555	0	0	2.24315	8.27218	MLXIPL;CEBPA;ZEB1;SELENOS;ZBTB16;ID2;ID4;ID3;MT3	0.0164534	1.60157
GO_Biological_Process_2021	regulation of cyclin-dependent protein serine/threonine kinase activity	3/82	0.0250505	0.191555	0	0	5.00456	18.4511	CEBPA;CDC25C;CDK5R2	0.0365854	1.60118
GO_Biological_Process_2021	extracellular structure organization	5/216	0.0254026	0.193197	0	0	3.14397	11.5475	VCAN;ITGA4;ADAMTS19;ITGA1;COL6A3	0.0231481	1.59512
GO_Biological_Process_2021	external encapsulating structure organization	5/217	0.0258469	0.195358	0	0	3.12898	11.4382	VCAN;ITGA4;ADAMTS19;ITGA1;COL6A3	0.0230415	1.58759
GO_Biological_Process_2021	regulation of neurotransmitter secretion	2/33	0.0262906	0.195358	0	0	8.46657	30.806	RIMS2;CPLX2	0.0606061	1.5802
GO_Biological_Process_2021	neuron projection extension	2/33	0.0262906	0.195358	0	0	8.46657	30.806	ALCAM;MAP1B	0.0606061	1.5802
GO_Biological_Process_2021	positive regulation of ATP metabolic process	2/33	0.0262906	0.195358	0	0	8.46657	30.806	MLXIPL;NUPR1	0.0606061	1.5802
GO_Biological_Process_2021	negative regulation of nucleic acid-templated transcription	8/464	0.0265584	0.195358	0	0	2.34616	8.51283	MLXIPL;CEBPA;ZEB1;ZBTB16;ID2;ID4;ID3;MT3	0.0172414	1.5758
GO_Biological_Process_2021	response to insulin	3/84	0.0266587	0.195358	0	0	4.88049	17.69	SELENOS;PKLR;INSIG1	0.0357143	1.57416
GO_Biological_Process_2021	vascular transport	3/84	0.0266587	0.195358	0	0	4.88049	17.69	SLC7A8;KCNJ8;SLCO3A1	0.0357143	1.57416
GO_Biological_Process_2021	regulation of cytosolic calcium ion concentration	4/148	0.0270925	0.195543	0	0	3.67319	13.2547	SCGN;PTGFR;TRPC5;CXCR4	0.027027	1.56715
GO_Biological_Process_2021	negative regulation of programmed cell death	7/381	0.0274965	0.195543	0	0	2.49636	8.97114	FABP1;EGR3;FLNA;ASNS;GCG;NUPR1;MT3	0.0183727	1.56072
GO_Biological_Process_2021	regulation of apoptotic process	11/742	0.0275026	0.195543	0	0	2.02574	7.27945	FABP1;TOX3;EGR3;GRM4;FRZB;FLNA;ASNS;GCG;NUPR1;MT3;CIDEC	0.0148248	1.56063
GO_Biological_Process_2021	regulation of amyloid-beta formation	2/34	0.0277958	0.195543	0	0	8.20157	29.3852	PRNP;APOE	0.0588235	1.55602
GO_Biological_Process_2021	central nervous system neuron differentiation	2/34	0.0277958	0.195543	0	0	8.20157	29.3852	MAP2;TOX	0.0588235	1.55602
GO_Biological_Process_2021	regulation of transmembrane transport	2/34	0.0277958	0.195543	0	0	8.20157	29.3852	KCNJ11;KCNJ8	0.0588235	1.55602
GO_Biological_Process_2021	positive regulation of epidermal growth factor receptor signaling pathway	2/34	0.0277958	0.195543	0	0	8.20157	29.3852	CCDC88A;TGFA	0.0588235	1.55602
GO_Biological_Process_2021	secondary alcohol biosynthetic process	2/34	0.0277958	0.195543	0	0	8.20157	29.3852	HMGCS1;INSIG1	0.0588235	1.55602
GO_Biological_Process_2021	extracellular matrix organization	6/300	0.0280773	0.196541	0	0	2.71456	9.69858	VCAN;ITGA4;ADAMTS19;SERPINF2;ITGA1;COL6A3	0.02	1.55165
GO_Biological_Process_2021	regulation of ion transmembrane transport	2/35	0.0293349	0.197484	0	0	7.95264	28.0647	KCNJ11;KCNJ8	0.0571429	1.53262
GO_Biological_Process_2021	regulation of trans-synaptic signaling	2/35	0.0293349	0.197484	0	0	7.95264	28.0647	FABP5;GRIK1	0.0571429	1.53262
GO_Biological_Process_2021	regulation of protein polymerization	2/35	0.0293349	0.197484	0	0	7.95264	28.0647	MAP2;PAK3	0.0571429	1.53262
GO_Biological_Process_2021	regulation of lipid biosynthetic process	2/35	0.0293349	0.197484	0	0	7.95264	28.0647	MLXIPL;APOE	0.0571429	1.53262
GO_Biological_Process_2021	cellular response to amyloid-beta	2/35	0.0293349	0.197484	0	0	7.95264	28.0647	PRNP;ITGA4	0.0571429	1.53262
GO_Biological_Process_2021	cholesterol biosynthetic process	2/35	0.0293349	0.197484	0	0	7.95264	28.0647	HMGCS1;INSIG1	0.0571429	1.53262
GO_Biological_Process_2021	semaphorin-plexin signaling pathway	2/35	0.0293349	0.197484	0	0	7.95264	28.0647	FLNA;PLXNA4	0.0571429	1.53262
GO_Biological_Process_2021	positive regulation of lipid biosynthetic process	2/35	0.0293349	0.197484	0	0	7.95264	28.0647	MLXIPL;APOE	0.0571429	1.53262
GO_Biological_Process_2021	positive regulation of cell population proliferation	8/474	0.0296204	0.198457	0	0	2.29463	8.07547	MLXIPL;PTGFR;BAMBI;ID2;SERPINF2;TGFA;LIFR;TOX	0.0168776	1.52841
GO_Biological_Process_2021	metal ion transport	3/88	0.0300372	0.200295	0	0	4.64988	16.2993	TRPC5;SLC3A2;MT3	0.0340909	1.52234
GO_Biological_Process_2021	regulation of ossification	2/36	0.0309072	0.200398	0	0	7.71835	26.8349	AHSG;ZBTB16	0.0555556	1.50994
GO_Biological_Process_2021	dendrite morphogenesis	2/36	0.0309072	0.200398	0	0	7.71835	26.8349	MAP2;PAK3	0.0555556	1.50994
GO_Biological_Process_2021	endoderm formation	2/36	0.0309072	0.200398	0	0	7.71835	26.8349	ITGA4;DUSP1	0.0555556	1.50994
GO_Biological_Process_2021	transition metal ion transport	2/36	0.0309072	0.200398	0	0	7.71835	26.8349	TRPC5;MT3	0.0555556	1.50994
GO_Biological_Process_2021	platelet aggregation	2/36	0.0309072	0.200398	0	0	7.71835	26.8349	HBB;FLNA	0.0555556	1.50994
GO_Biological_Process_2021	regulation of cardiac muscle contraction	2/36	0.0309072	0.200398	0	0	7.71835	26.8349	CHGA;RGS2	0.0555556	1.50994
GO_Biological_Process_2021	regulation of glucose import	2/37	0.0325123	0.201542	0	0	7.49745	25.6873	SELENOS;GRB10	0.0540541	1.48795
GO_Biological_Process_2021	retinoid metabolic process	3/92	0.0336308	0.201542	0	0	4.44	15.0619	GPC5;APOE;GPC6	0.0326087	1.47326
GO_Biological_Process_2021	regulation of apoptotic signaling pathway	2/38	0.0341494	0.201542	0	0	7.28882	24.6144	GATA4;TPD52L1	0.0526316	1.46662
GO_Biological_Process_2021	connective tissue development	2/38	0.0341494	0.201542	0	0	7.28882	24.6144	ZBTB16;SOX5	0.0526316	1.46662
GO_Biological_Process_2021	positive regulation of insulin secretion	2/38	0.0341494	0.201542	0	0	7.28882	24.6144	GLUD1;GCG	0.0526316	1.46662
GO_Biological_Process_2021	sterol biosynthetic process	2/38	0.0341494	0.201542	0	0	7.28882	24.6144	HMGCS1;INSIG1	0.0526316	1.46662
GO_Biological_Process_2021	regulation of transcription, DNA-templated	25/2244	0.0345905	0.201542	0	0	1.55159	5.21981	CEBPA;ONECUT2;TCF7;TGFA;GATA4;ELAVL2;APOE;JUNB;SOX5;EGR3;ZBTB16;RFX2;PAX6;RGMB;MT3;MLXIPL;TOX3;ZEB1;BAMBI;ID2;ID4;NFE2L3;ID3;MXD1;TOX	0.0111408	1.46104
GO_Biological_Process_2021	negative regulation of cell death	3/94	0.0355077	0.201542	0	0	4.34198	14.4935	CHGA;GATA4;MT3	0.0319149	1.44968
GO_Biological_Process_2021	hemopoiesis	3/94	0.0355077	0.201542	0	0	4.34198	14.4935	CEBPA;ZBTB16;TOX	0.0319149	1.44968
GO_Biological_Process_2021	negative regulation of MAPK cascade	3/94	0.0355077	0.201542	0	0	4.34198	14.4935	RGS2;DUSP1;APOE	0.0319149	1.44968
GO_Biological_Process_2021	negative regulation of cellular metabolic process	2/39	0.0358181	0.201542	0	0	7.09146	23.6096	APOE;MT3	0.0512821	1.4459
GO_Biological_Process_2021	regulation of ERK1 and ERK2 cascade	5/238	0.0363441	0.201542	0	0	2.84393	9.42684	SERPINF2;GATA4;APOE;ROS1;MT3	0.0210084	1.43957
GO_Biological_Process_2021	axonogenesis	5/240	0.0374624	0.201542	0	0	2.81944	9.26021	MAP1B;GRB10;SLITRK6;CXCR4;PAK3	0.0208333	1.4264
GO_Biological_Process_2021	negative regulation of ERBB signaling pathway	2/40	0.0375178	0.201542	0	0	6.9045	22.6671	ITGA1;TGFA	0.05	1.42576
GO_Biological_Process_2021	sulfur compound catabolic process	2/40	0.0375178	0.201542	0	0	6.9045	22.6671	VCAN;CHAC2	0.05	1.42576
GO_Biological_Process_2021	synaptic vesicle exocytosis	2/40	0.0375178	0.201542	0	0	6.9045	22.6671	RIMS2;CPLX2	0.05	1.42576
GO_Biological_Process_2021	regulation of core promoter binding	1/5	0.0376727	0.201542	0	0	32.6365	107.009	PAX6	0.2	1.42397
GO_Biological_Process_2021	regulation of chloride transport	1/5	0.0376727	0.201542	0	0	32.6365	107.009	PRNP	0.2	1.42397
GO_Biological_Process_2021	regulation of cardioblast differentiation	1/5	0.0376727	0.201542	0	0	32.6365	107.009	GATA4	0.2	1.42397
GO_Biological_Process_2021	cell-cell adhesion mediated by integrin	1/5	0.0376727	0.201542	0	0	32.6365	107.009	ITGA4	0.2	1.42397
GO_Biological_Process_2021	negative regulation of sterol biosynthetic process	1/5	0.0376727	0.201542	0	0	32.6365	107.009	APOE	0.2	1.42397
GO_Biological_Process_2021	regulation of chaperone-mediated protein folding	1/5	0.0376727	0.201542	0	0	32.6365	107.009	SGTB	0.2	1.42397
GO_Biological_Process_2021	positive regulation of cardioblast differentiation	1/5	0.0376727	0.201542	0	0	32.6365	107.009	GATA4	0.2	1.42397
GO_Biological_Process_2021	negative regulation of cholesterol metabolic process	1/5	0.0376727	0.201542	0	0	32.6365	107.009	APOE	0.2	1.42397
GO_Biological_Process_2021	negative regulation of cholesterol biosynthetic process	1/5	0.0376727	0.201542	0	0	32.6365	107.009	APOE	0.2	1.42397
GO_Biological_Process_2021	negative regulation of cellular respiration	1/5	0.0376727	0.201542	0	0	32.6365	107.009	MLXIPL	0.2	1.42397
GO_Biological_Process_2021	negative regulation of B cell differentiation	1/5	0.0376727	0.201542	0	0	32.6365	107.009	ID2	0.2	1.42397
GO_Biological_Process_2021	cerebral cortex neuron differentiation	1/5	0.0376727	0.201542	0	0	32.6365	107.009	TOX	0.2	1.42397
GO_Biological_Process_2021	negative regulation of transcription by RNA polymerase I	1/5	0.0376727	0.201542	0	0	32.6365	107.009	FLNA	0.2	1.42397
GO_Biological_Process_2021	xylulose 5-phosphate biosynthetic process	1/5	0.0376727	0.201542	0	0	32.6365	107.009	SORD	0.2	1.42397
GO_Biological_Process_2021	chemokine (C-X-C motif) ligand 12 signaling pathway	1/5	0.0376727	0.201542	0	0	32.6365	107.009	CXCR4	0.2	1.42397
GO_Biological_Process_2021	lipid transport across blood-brain barrier	1/5	0.0376727	0.201542	0	0	32.6365	107.009	FABP5	0.2	1.42397
GO_Biological_Process_2021	prostaglandin transport	1/5	0.0376727	0.201542	0	0	32.6365	107.009	SLCO3A1	0.2	1.42397
GO_Biological_Process_2021	proline transmembrane transport	1/5	0.0376727	0.201542	0	0	32.6365	107.009	SLC7A8	0.2	1.42397
GO_Biological_Process_2021	membrane repolarization during ventricular cardiac muscle cell action potential	1/5	0.0376727	0.201542	0	0	32.6365	107.009	KCNJ8	0.2	1.42397
GO_Biological_Process_2021	positive regulation of protein localization to cilium	1/5	0.0376727	0.201542	0	0	32.6365	107.009	CCDC88A	0.2	1.42397
GO_Biological_Process_2021	positive regulation of necrotic cell death	1/5	0.0376727	0.201542	0	0	32.6365	107.009	MT3	0.2	1.42397
GO_Biological_Process_2021	ciliary neurotrophic factor-mediated signaling pathway	1/5	0.0376727	0.201542	0	0	32.6365	107.009	LIFR	0.2	1.42397
GO_Biological_Process_2021	positive regulation of membrane permeability	1/5	0.0376727	0.201542	0	0	32.6365	107.009	MT3	0.2	1.42397
GO_Biological_Process_2021	His-Purkinje system development	1/5	0.0376727	0.201542	0	0	32.6365	107.009	ID2	0.2	1.42397
GO_Biological_Process_2021	glutamate catabolic process	1/5	0.0376727	0.201542	0	0	32.6365	107.009	GLUD1	0.2	1.42397
GO_Biological_Process_2021	glucuronate catabolic process to xylulose 5-phosphate	1/5	0.0376727	0.201542	0	0	32.6365	107.009	SORD	0.2	1.42397
GO_Biological_Process_2021	glucuronate catabolic process	1/5	0.0376727	0.201542	0	0	32.6365	107.009	SORD	0.2	1.42397
GO_Biological_Process_2021	positive regulation of DNA demethylation	1/5	0.0376727	0.201542	0	0	32.6365	107.009	TOX	0.2	1.42397
GO_Biological_Process_2021	regulation of synapse structural plasticity	1/5	0.0376727	0.201542	0	0	32.6365	107.009	CAMK2B	0.2	1.42397
GO_Biological_Process_2021	regulation of low-density lipoprotein particle receptor catabolic process	1/5	0.0376727	0.201542	0	0	32.6365	107.009	APOE	0.2	1.42397
GO_Biological_Process_2021	glycosaminoglycan biosynthetic process	3/97	0.0384225	0.204775	0	0	4.20277	13.6973	VCAN;GPC5;GPC6	0.0309278	1.41541
KEGG_2021_Human	Insulin secretion	4/86	0.00430162	0.205481	0	0	6.47078	35.2578	RIMS2;CAMK2B;KCNJ11;GCG	0.0465116	2.36637
KEGG_2021_Human	Neuroactive ligand-receptor interaction	8/341	0.00480656	0.205481	0	0	3.23314	17.2577	PTGFR;GAL;GRM4;GRM7;PRLHR;GCG;GRIK1;SSTR1	0.0234604	2.31817
GO_Biological_Process_2021	regulation of MAPK cascade	4/166	0.0388269	0.206149	0	0	3.26208	10.5973	GRM4;DUSP1;PAK3;ROS1	0.0240964	1.41087
GO_Biological_Process_2021	hexose metabolic process	2/41	0.0392478	0.206823	0	0	6.72712	21.7815	KCNJ11;SORD	0.0487805	1.40618
GO_Biological_Process_2021	carboxylic acid transmembrane transport	2/41	0.0392478	0.206823	0	0	6.72712	21.7815	SLC7A8;SLC38A11	0.0487805	1.40618
GO_Biological_Process_2021	potassium ion import across plasma membrane	2/42	0.0410077	0.207079	0	0	6.55861	20.9482	KCNJ11;KCNJ8	0.047619	1.38713
GO_Biological_Process_2021	positive regulation of protein tyrosine kinase activity	2/42	0.0410077	0.207079	0	0	6.55861	20.9482	PRNP;TGFA	0.047619	1.38713
GO_Biological_Process_2021	cellular response to chemical stress	3/101	0.0424929	0.207079	0	0	4.03041	12.7297	SELENOS;GPX8;MT3	0.029703	1.37168
GO_Biological_Process_2021	neuron projection development	4/171	0.0425285	0.207079	0	0	3.16361	9.98934	GRM7;MAP2;APOE;PAK3	0.0233918	1.37132
GO_Biological_Process_2021	signal release from synapse	2/43	0.0427969	0.207079	0	0	6.39832	20.163	GRM4;CPLX2	0.0465116	1.36859
GO_Biological_Process_2021	negative regulation of proteolysis	2/43	0.0427969	0.207079	0	0	6.39832	20.163	PRNP;SERPINE2	0.0465116	1.36859
GO_Biological_Process_2021	positive regulation of ERK1 and ERK2 cascade	4/172	0.0432919	0.207079	0	0	3.14461	9.87343	SERPINF2;GATA4;APOE;MT3	0.0232558	1.36359
GO_Biological_Process_2021	calcium-mediated signaling	3/102	0.043543	0.207079	0	0	3.98949	12.5031	PTGFR;PRNP;CXCR4	0.0294118	1.36108
GO_Biological_Process_2021	regulation of cell death	3/102	0.043543	0.207079	0	0	3.98949	12.5031	CTSZ;HBB;MT3	0.0294118	1.36108
GO_Biological_Process_2021	positive regulation of signal transduction	5/252	0.0446146	0.207079	0	0	2.68082	8.33652	RIMS2;GRB10;FLNA;TPD52L1;MT3	0.0198413	1.35052
GO_Biological_Process_2021	metal ion homeostasis	2/44	0.0446148	0.207079	0	0	6.24566	19.4221	SLC7A8;MT3	0.0454545	1.35052
GO_Biological_Process_2021	positive regulation of stress fiber assembly	2/44	0.0446148	0.207079	0	0	6.24566	19.4221	CCDC88A;SERPINF2	0.0454545	1.35052
GO_Biological_Process_2021	homotypic cell-cell adhesion	2/44	0.0446148	0.207079	0	0	6.24566	19.4221	HBB;FLNA	0.0454545	1.35052
GO_Biological_Process_2021	response to amyloid-beta	2/44	0.0446148	0.207079	0	0	6.24566	19.4221	PRNP;ITGA4	0.0454545	1.35052
GO_Biological_Process_2021	negative regulation of epidermal growth factor receptor signaling pathway	2/44	0.0446148	0.207079	0	0	6.24566	19.4221	ITGA1;TGFA	0.0454545	1.35052
GO_Biological_Process_2021	cation transport	4/174	0.044842	0.207079	0	0	3.1073	9.64697	KCNJ8;SLC7A8;SCN9A;SLC3A2	0.0229885	1.34832
GO_Biological_Process_2021	negative regulation of amino acid transport	1/6	0.0450364	0.207079	0	0	26.1079	80.9419	GRM7	0.166667	1.34644
GO_Biological_Process_2021	neurotransmitter-gated ion channel clustering	1/6	0.0450364	0.207079	0	0	26.1079	80.9419	APOE	0.166667	1.34644
GO_Biological_Process_2021	negative regulation of anion transport	1/6	0.0450364	0.207079	0	0	26.1079	80.9419	GRM7	0.166667	1.34644
GO_Biological_Process_2021	retinal ganglion cell axon guidance	1/6	0.0450364	0.207079	0	0	26.1079	80.9419	ALCAM	0.166667	1.34644
GO_Biological_Process_2021	regulation of type B pancreatic cell proliferation	1/6	0.0450364	0.207079	0	0	26.1079	80.9419	NUPR1	0.166667	1.34644
GO_Biological_Process_2021	regulation of relaxation of cardiac muscle	1/6	0.0450364	0.207079	0	0	26.1079	80.9419	CHGA	0.166667	1.34644
GO_Biological_Process_2021	regulation of protein depolymerization	1/6	0.0450364	0.207079	0	0	26.1079	80.9419	MAP1B	0.166667	1.34644
GO_Biological_Process_2021	regulation of mitotic spindle checkpoint	1/6	0.0450364	0.207079	0	0	26.1079	80.9419	DUSP1	0.166667	1.34644
GO_Biological_Process_2021	regulation of mitotic sister chromatid segregation	1/6	0.0450364	0.207079	0	0	26.1079	80.9419	DUSP1	0.166667	1.34644
GO_Biological_Process_2021	regulation of microtubule motor activity	1/6	0.0450364	0.207079	0	0	26.1079	80.9419	MAP2	0.166667	1.34644
GO_Biological_Process_2021	regulation of macrophage apoptotic process	1/6	0.0450364	0.207079	0	0	26.1079	80.9419	SELENOS	0.166667	1.34644
GO_Biological_Process_2021	regulation of protein localization to cilium	1/6	0.0450364	0.207079	0	0	26.1079	80.9419	CCDC88A	0.166667	1.34644
GO_Biological_Process_2021	chitin metabolic process	1/6	0.0450364	0.207079	0	0	26.1079	80.9419	CHIA	0.166667	1.34644
GO_Biological_Process_2021	regulation of glutamate receptor signaling pathway	1/6	0.0450364	0.207079	0	0	26.1079	80.9419	PRNP	0.166667	1.34644
GO_Biological_Process_2021	regulation of DNA demethylation	1/6	0.0450364	0.207079	0	0	26.1079	80.9419	TOX	0.166667	1.34644
GO_Biological_Process_2021	negative regulation of myeloid cell apoptotic process	1/6	0.0450364	0.207079	0	0	26.1079	80.9419	SELENOS	0.166667	1.34644
GO_Biological_Process_2021	negative regulation of monocyte chemotaxis	1/6	0.0450364	0.207079	0	0	26.1079	80.9419	DUSP1	0.166667	1.34644
GO_Biological_Process_2021	negative regulation of meiotic cell cycle	1/6	0.0450364	0.207079	0	0	26.1079	80.9419	DUSP1	0.166667	1.34644
GO_Biological_Process_2021	negative regulation of glycogen biosynthetic process	1/6	0.0450364	0.207079	0	0	26.1079	80.9419	SELENOS	0.166667	1.34644
GO_Biological_Process_2021	attachment of GPI anchor to protein	1/6	0.0450364	0.207079	0	0	26.1079	80.9419	PGAP1	0.166667	1.34644
GO_Biological_Process_2021	chitin catabolic process	1/6	0.0450364	0.207079	0	0	26.1079	80.9419	CHIA	0.166667	1.34644
GO_Biological_Process_2021	regulation of anion channel activity	1/6	0.0450364	0.207079	0	0	26.1079	80.9419	PRNP	0.166667	1.34644
GO_Biological_Process_2021	astrocyte development	1/6	0.0450364	0.207079	0	0	26.1079	80.9419	MT3	0.166667	1.34644
GO_Biological_Process_2021	regulation of insulin receptor signaling pathway	2/45	0.0464609	0.211026	0	0	6.10011	18.7221	AHSG;GRB10	0.0444444	1.33291
GO_Biological_Process_2021	alpha-amino acid metabolic process	2/46	0.0483346	0.211026	0	0	5.96117	18.06	GLUD1;ASNS	0.0434783	1.31574
GO_Biological_Process_2021	positive regulation of smooth muscle cell proliferation	2/46	0.0483346	0.211026	0	0	5.96117	18.06	ID2;SERPINF2	0.0434783	1.31574
GO_Biological_Process_2021	positive regulation of neuron death	2/47	0.0502355	0.211026	0	0	5.8284	17.4329	PRNP;NUPR1	0.0425532	1.29899
GO_Biological_Process_2021	lipid transport	3/109	0.0512531	0.211026	0	0	3.72472	11.0661	FABP5;SLCO3A1;APOE	0.0275229	1.29028
GO_Biological_Process_2021	myelination	2/48	0.0521631	0.211026	0	0	5.70141	16.8384	NFASC;CXCR4	0.0416667	1.28264
GO_Biological_Process_2021	regulation of protein metabolic process	2/48	0.0521631	0.211026	0	0	5.70141	16.8384	APOE;ZDHHC2	0.0416667	1.28264
GO_Biological_Process_2021	regulation of mesenchymal stem cell differentiation	1/7	0.052344	0.211026	0	0	21.7555	64.1769	SOX5	0.142857	1.28113
GO_Biological_Process_2021	chylomicron remnant clearance	1/7	0.052344	0.211026	0	0	21.7555	64.1769	APOE	0.142857	1.28113
GO_Biological_Process_2021	nucleobase catabolic process	1/7	0.052344	0.211026	0	0	21.7555	64.1769	DPYSL3	0.142857	1.28113
GO_Biological_Process_2021	creatine metabolic process	1/7	0.052344	0.211026	0	0	21.7555	64.1769	GATM	0.142857	1.28113
GO_Biological_Process_2021	positive regulation of synaptic plasticity	1/7	0.052344	0.211026	0	0	21.7555	64.1769	CPLX2	0.142857	1.28113
GO_Biological_Process_2021	cellular cation homeostasis	1/7	0.052344	0.211026	0	0	21.7555	64.1769	MT3	0.142857	1.28113
GO_Biological_Process_2021	negative regulation of p38MAPK cascade	1/7	0.052344	0.211026	0	0	21.7555	64.1769	DUSP1	0.142857	1.28113
GO_Biological_Process_2021	cation homeostasis	1/7	0.052344	0.211026	0	0	21.7555	64.1769	SLC7A8	0.142857	1.28113
GO_Biological_Process_2021	regulation of cGMP-mediated signaling	1/7	0.052344	0.211026	0	0	21.7555	64.1769	RUNDC3A	0.142857	1.28113
GO_Biological_Process_2021	negative regulation of lymphocyte differentiation	1/7	0.052344	0.211026	0	0	21.7555	64.1769	ID2	0.142857	1.28113
GO_Biological_Process_2021	dense core granule cytoskeletal transport	1/7	0.052344	0.211026	0	0	21.7555	64.1769	KIF1A	0.142857	1.28113
GO_Biological_Process_2021	regulation of microtubule binding	1/7	0.052344	0.211026	0	0	21.7555	64.1769	MAP2	0.142857	1.28113
GO_Biological_Process_2021	positive regulation of integrin-mediated signaling pathway	1/7	0.052344	0.211026	0	0	21.7555	64.1769	FLNA	0.142857	1.28113
GO_Biological_Process_2021	oxygen transport	1/7	0.052344	0.211026	0	0	21.7555	64.1769	HBB	0.142857	1.28113
GO_Biological_Process_2021	regulation of necrotic cell death	1/7	0.052344	0.211026	0	0	21.7555	64.1769	MT3	0.142857	1.28113
GO_Biological_Process_2021	negative regulation of acute inflammatory response	1/7	0.052344	0.211026	0	0	21.7555	64.1769	SELENOS	0.142857	1.28113
GO_Biological_Process_2021	monoacylglycerol catabolic process	1/7	0.052344	0.211026	0	0	21.7555	64.1769	FAAH	0.142857	1.28113
GO_Biological_Process_2021	thyroid hormone transport	1/7	0.052344	0.211026	0	0	21.7555	64.1769	SLC7A8	0.142857	1.28113
GO_Biological_Process_2021	positive regulation of receptor catabolic process	1/7	0.052344	0.211026	0	0	21.7555	64.1769	APOE	0.142857	1.28113
GO_Biological_Process_2021	negative regulation of glycogen metabolic process	1/7	0.052344	0.211026	0	0	21.7555	64.1769	SELENOS	0.142857	1.28113
GO_Biological_Process_2021	regulation of vesicle size	1/7	0.052344	0.211026	0	0	21.7555	64.1769	RAB3B	0.142857	1.28113
GO_Biological_Process_2021	glutathione catabolic process	1/7	0.052344	0.211026	0	0	21.7555	64.1769	CHAC2	0.142857	1.28113
GO_Biological_Process_2021	glandular epithelial cell development	1/7	0.052344	0.211026	0	0	21.7555	64.1769	PAX6	0.142857	1.28113
GO_Biological_Process_2021	gamma-delta T cell activation	1/7	0.052344	0.211026	0	0	21.7555	64.1769	TCF7	0.142857	1.28113
GO_Biological_Process_2021	regulation of systemic arterial blood pressure by renin-angiotensin	1/7	0.052344	0.211026	0	0	21.7555	64.1769	SERPINF2	0.142857	1.28113
GO_Biological_Process_2021	fatty acid elongation, saturated fatty acid	1/7	0.052344	0.211026	0	0	21.7555	64.1769	ELOVL6	0.142857	1.28113
GO_Biological_Process_2021	fatty acid elongation, polyunsaturated fatty acid	1/7	0.052344	0.211026	0	0	21.7555	64.1769	ELOVL6	0.142857	1.28113
GO_Biological_Process_2021	fatty acid elongation, monounsaturated fatty acid	1/7	0.052344	0.211026	0	0	21.7555	64.1769	ELOVL6	0.142857	1.28113
GO_Biological_Process_2021	positive regulation of amyloid-beta clearance	1/7	0.052344	0.211026	0	0	21.7555	64.1769	APOE	0.142857	1.28113
GO_Biological_Process_2021	peptide transport	1/7	0.052344	0.211026	0	0	21.7555	64.1769	CDH17	0.142857	1.28113
GO_Biological_Process_2021	negative regulation of intracellular transport	1/7	0.052344	0.211026	0	0	21.7555	64.1769	INSIG1	0.142857	1.28113
GO_Biological_Process_2021	fatty acid elongation, unsaturated fatty acid	1/7	0.052344	0.211026	0	0	21.7555	64.1769	ELOVL6	0.142857	1.28113
GO_Biological_Process_2021	atrioventricular valve formation	1/7	0.052344	0.211026	0	0	21.7555	64.1769	GATA4	0.142857	1.28113
GO_Biological_Process_2021	regulation of atrial cardiac muscle cell membrane repolarization	1/7	0.052344	0.211026	0	0	21.7555	64.1769	FLNA	0.142857	1.28113
GO_Biological_Process_2021	astrocyte differentiation	1/7	0.052344	0.211026	0	0	21.7555	64.1769	MT3	0.142857	1.28113
GO_Biological_Process_2021	negative regulation of catecholamine secretion	1/7	0.052344	0.211026	0	0	21.7555	64.1769	CHGA	0.142857	1.28113
Reactome_2016	NCAM1 interactions	2/37	0.0325123	0.21191	0	0	7.49745	25.6873	PRNP;COL6A3	0.0540541	1.48795
GO_Biological_Process_2021	regulation of smooth muscle cell proliferation	2/49	0.0541167	0.2157	0	0	5.57982	16.2742	ID2;SERPINF2	0.0408163	1.26667
GO_Biological_Process_2021	negative regulation of catabolic process	2/49	0.0541167	0.2157	0	0	5.57982	16.2742	FLNA;NUPR1	0.0408163	1.26667
GO_Biological_Process_2021	aminoglycan biosynthetic process	2/49	0.0541167	0.2157	0	0	5.57982	16.2742	GPC5;GPC6	0.0408163	1.26667
GO_Biological_Process_2021	response to hydrogen peroxide	2/49	0.0541167	0.2157	0	0	5.57982	16.2742	FABP1;HBB	0.0408163	1.26667
GO_Biological_Process_2021	negative regulation of signal transduction	5/267	0.0546327	0.217121	0	0	2.5254	7.34165	RGS2;FRZB;AHSG;GRB10;GATA4	0.0187266	1.26255
GO_Biological_Process_2021	central nervous system development	5/268	0.0553434	0.217121	0	0	2.51567	7.28085	VCAN;ZBTB16;CXCR4;PAX6;GRIK1	0.0186567	1.25693
GO_Biological_Process_2021	activation of protein kinase activity	3/114	0.0571378	0.217121	0	0	3.55604	10.1784	CCDC88A;PAK3;MT3	0.0263158	1.24308
GO_Biological_Process_2021	regulation of axonogenesis	2/51	0.0581004	0.217121	0	0	5.35153	15.2282	PAK3;PLXNA4	0.0392157	1.23582
GO_Biological_Process_2021	regulation of protein modification process	2/51	0.0581004	0.217121	0	0	5.35153	15.2282	CCDC88A;MT3	0.0392157	1.23582
GO_Biological_Process_2021	positive regulation of actin filament bundle assembly	2/51	0.0581004	0.217121	0	0	5.35153	15.2282	CCDC88A;SERPINF2	0.0392157	1.23582
GO_Biological_Process_2021	neuron projection extension involved in neuron projection guidance	1/8	0.0595961	0.217121	0	0	18.6466	52.5865	ALCAM	0.125	1.22478
GO_Biological_Process_2021	negative regulation of phospholipase activity	1/8	0.0595961	0.217121	0	0	18.6466	52.5865	RGS2	0.125	1.22478
GO_Biological_Process_2021	negative regulation of muscle hypertrophy	1/8	0.0595961	0.217121	0	0	18.6466	52.5865	RGS2	0.125	1.22478
GO_Biological_Process_2021	regulation of dopamine uptake involved in synaptic transmission	1/8	0.0595961	0.217121	0	0	18.6466	52.5865	RAB3B	0.125	1.22478
GO_Biological_Process_2021	regulation of extent of cell growth	1/8	0.0595961	0.217121	0	0	18.6466	52.5865	APOE	0.125	1.22478
GO_Biological_Process_2021	mammary gland epithelial cell differentiation	1/8	0.0595961	0.217121	0	0	18.6466	52.5865	ID2	0.125	1.22478
GO_Biological_Process_2021	regulation of nitric oxide metabolic process	1/8	0.0595961	0.217121	0	0	18.6466	52.5865	SELENOS	0.125	1.22478
GO_Biological_Process_2021	SREBP signaling pathway	1/8	0.0595961	0.217121	0	0	18.6466	52.5865	INSIG1	0.125	1.22478
GO_Biological_Process_2021	regulation of protein glycosylation	1/8	0.0595961	0.217121	0	0	18.6466	52.5865	MT3	0.125	1.22478
GO_Biological_Process_2021	negative regulation of long-term synaptic potentiation	1/8	0.0595961	0.217121	0	0	18.6466	52.5865	APOE	0.125	1.22478
GO_Biological_Process_2021	natural killer cell differentiation	1/8	0.0595961	0.217121	0	0	18.6466	52.5865	TOX	0.125	1.22478
GO_Biological_Process_2021	ER overload response	1/8	0.0595961	0.217121	0	0	18.6466	52.5865	SELENOS	0.125	1.22478
GO_Biological_Process_2021	ventricular cardiac muscle cell membrane repolarization	1/8	0.0595961	0.217121	0	0	18.6466	52.5865	KCNJ8	0.125	1.22478
GO_Biological_Process_2021	membrane fusion involved in viral entry into host cell	1/8	0.0595961	0.217121	0	0	18.6466	52.5865	CXCR4	0.125	1.22478
GO_Biological_Process_2021	mast cell degranulation	1/8	0.0595961	0.217121	0	0	18.6466	52.5865	CHGA	0.125	1.22478
GO_Biological_Process_2021	mast cell activation involved in immune response	1/8	0.0595961	0.217121	0	0	18.6466	52.5865	CHGA	0.125	1.22478
GO_Biological_Process_2021	fructose metabolic process	1/8	0.0595961	0.217121	0	0	18.6466	52.5865	SORD	0.125	1.22478
GO_Biological_Process_2021	fusion of virus membrane with host plasma membrane	1/8	0.0595961	0.217121	0	0	18.6466	52.5865	CXCR4	0.125	1.22478
GO_Biological_Process_2021	regulation of transcription from RNA polymerase II promoter in response to oxidative stress	1/8	0.0595961	0.217121	0	0	18.6466	52.5865	MT3	0.125	1.22478
GO_Biological_Process_2021	positive regulation of endocytic recycling	1/8	0.0595961	0.217121	0	0	18.6466	52.5865	ZDHHC2	0.125	1.22478
GO_Biological_Process_2021	positive regulation of oligodendrocyte differentiation	1/8	0.0595961	0.217121	0	0	18.6466	52.5865	CXCR4	0.125	1.22478
GO_Biological_Process_2021	negative regulation of muscle cell differentiation	1/8	0.0595961	0.217121	0	0	18.6466	52.5865	ID2	0.125	1.22478
GO_Biological_Process_2021	dendritic spine maintenance	1/8	0.0595961	0.217121	0	0	18.6466	52.5865	PRNP	0.125	1.22478
GO_Biological_Process_2021	regulation of Cdc42 protein signal transduction	1/8	0.0595961	0.217121	0	0	18.6466	52.5865	APOE	0.125	1.22478
GO_Biological_Process_2021	axon extension involved in axon guidance	1/8	0.0595961	0.217121	0	0	18.6466	52.5865	ALCAM	0.125	1.22478
GO_Biological_Process_2021	pyrimidine nucleobase catabolic process	1/8	0.0595961	0.217121	0	0	18.6466	52.5865	DPYSL3	0.125	1.22478
GO_Biological_Process_2021	aspartate family amino acid biosynthetic process	1/8	0.0595961	0.217121	0	0	18.6466	52.5865	ASNS	0.125	1.22478
GO_Biological_Process_2021	inorganic cation transmembrane transport	5/274	0.0597199	0.217121	0	0	2.45881	6.92914	TRPC5;KCNJ8;KCNJ11;SCN9A;OTOP3	0.0182482	1.22388
GO_Biological_Process_2021	myeloid cell differentiation	2/52	0.0601294	0.217486	0	0	5.24424	14.7429	CEBPA;ZBTB16	0.0384615	1.22091
GO_Biological_Process_2021	cartilage development	2/52	0.0601294	0.217486	0	0	5.24424	14.7429	ZBTB16;SOX5	0.0384615	1.22091
Reactome_2016	Signal Transduction	27/2465	0.0342016	0.21901	0	0	1.53015	5.16499	CAMK2B;PTGFR;TCF7;CXCR4;RGS2;GRM4;GRM7;GRB10;FLNA;PRLHR;GPC5;APOE;PAK3;GPC6;JUNB;RGS6;PRKG1;DUSP1;GCG;SSTR1;ARHGAP26;CDC25C;GNAO1;GAL;FABP5;BAMBI;COL6A3	0.0109533	1.46595
Reactome_2016	Class C/3 (Metabotropic glutamate/pheromone receptors)	2/40	0.0375178	0.221783	0	0	6.9045	22.6671	GRM4;GRM7	0.05	1.42576
Reactome_2016	Cyclin B2 mediated events	1/5	0.0376727	0.221783	0	0	32.6365	107.009	CDC25C	0.2	1.42397
Reactome_2016	PKA-mediated phosphorylation of key metabolic factors	1/5	0.0376727	0.221783	0	0	32.6365	107.009	MLXIPL	0.2	1.42397
Reactome_2016	Catabolism of glucuronate to xylulose-5-phosphate	1/5	0.0376727	0.221783	0	0	32.6365	107.009	SORD	0.2	1.42397
Reactome_2016	IRS activation	1/5	0.0376727	0.221783	0	0	32.6365	107.009	GRB10	0.2	1.42397
Reactome_2016	Visual phototransduction	3/97	0.0384225	0.222607	0	0	4.20277	13.6973	GPC5;APOE;GPC6	0.0309278	1.41541
GO_Biological_Process_2021	negative regulation of cysteine-type endopeptidase activity	2/53	0.0621825	0.224291	0	0	5.14115	14.2805	FABP1;MT3	0.0377358	1.20633
GO_Biological_Process_2021	plasma membrane bounded cell projection assembly	5/278	0.0627446	0.224291	0	0	2.42228	6.70654	CCDC88A;RFX2;SCLT1;FLNA;SEPTIN6	0.0179856	1.20242
GO_Biological_Process_2021	regulation of proteasomal protein catabolic process	2/54	0.0642592	0.224291	0	0	5.04203	13.8395	NUPR1;APOE	0.037037	1.19206
GO_Biological_Process_2021	regulation of cyclin-dependent protein kinase activity	2/54	0.0642592	0.224291	0	0	5.04203	13.8395	CDC25C;CDK5R2	0.037037	1.19206
GO_Biological_Process_2021	regulation of signal transduction	4/198	0.0658311	0.224291	0	0	2.71957	7.39905	PRNP;RGS2;LIFR;RGS6	0.020202	1.18157
GO_Biological_Process_2021	negative regulation of cysteine-type endopeptidase activity involved in apoptotic process	2/55	0.0663591	0.224291	0	0	4.94665	13.4186	FABP1;MT3	0.0363636	1.1781
GO_Biological_Process_2021	cellular response to sterol depletion	1/9	0.0667931	0.224291	0	0	16.315	44.1508	INSIG1	0.111111	1.17527
GO_Biological_Process_2021	glucosamine-containing compound catabolic process	1/9	0.0667931	0.224291	0	0	16.315	44.1508	CHIA	0.111111	1.17527
GO_Biological_Process_2021	one-carbon compound transport	1/9	0.0667931	0.224291	0	0	16.315	44.1508	UPK3A	0.111111	1.17527
GO_Biological_Process_2021	embryonic digestive tract morphogenesis	1/9	0.0667931	0.224291	0	0	16.315	44.1508	ID2	0.111111	1.17527
GO_Biological_Process_2021	endothelial cell chemotaxis	1/9	0.0667931	0.224291	0	0	16.315	44.1508	EGR3	0.111111	1.17527
GO_Biological_Process_2021	positive regulation of blood pressure	1/9	0.0667931	0.224291	0	0	16.315	44.1508	ID2	0.111111	1.17527
GO_Biological_Process_2021	positive regulation of cell-cell adhesion mediated by cadherin	1/9	0.0667931	0.224291	0	0	16.315	44.1508	SERPINF2	0.111111	1.17527
GO_Biological_Process_2021	positive regulation of cholesterol esterification	1/9	0.0667931	0.224291	0	0	16.315	44.1508	APOE	0.111111	1.17527
GO_Biological_Process_2021	hormone transport	1/9	0.0667931	0.224291	0	0	16.315	44.1508	SLC7A8	0.111111	1.17527
GO_Biological_Process_2021	cellular response to reactive nitrogen species	1/9	0.0667931	0.224291	0	0	16.315	44.1508	MT3	0.111111	1.17527
GO_Biological_Process_2021	icosanoid transport	1/9	0.0667931	0.224291	0	0	16.315	44.1508	SLCO3A1	0.111111	1.17527
GO_Biological_Process_2021	intestinal epithelial cell differentiation	1/9	0.0667931	0.224291	0	0	16.315	44.1508	GATA4	0.111111	1.17527
GO_Biological_Process_2021	semaphorin-plexin signaling pathway involved in axon guidance	1/9	0.0667931	0.224291	0	0	16.315	44.1508	PLXNA4	0.111111	1.17527
GO_Biological_Process_2021	lipoprotein metabolic process	1/9	0.0667931	0.224291	0	0	16.315	44.1508	APOE	0.111111	1.17527
GO_Biological_Process_2021	mast cell mediated immunity	1/9	0.0667931	0.224291	0	0	16.315	44.1508	CHGA	0.111111	1.17527
GO_Biological_Process_2021	chylomicron remodeling	1/9	0.0667931	0.224291	0	0	16.315	44.1508	APOE	0.111111	1.17527
GO_Biological_Process_2021	positive regulation of synapse maturation	1/9	0.0667931	0.224291	0	0	16.315	44.1508	CAMK2B	0.111111	1.17527
GO_Biological_Process_2021	cellular response to nitric oxide	1/9	0.0667931	0.224291	0	0	16.315	44.1508	MT3	0.111111	1.17527
GO_Biological_Process_2021	cellular response to leptin stimulus	1/9	0.0667931	0.224291	0	0	16.315	44.1508	MT3	0.111111	1.17527
GO_Biological_Process_2021	regulation of ER to Golgi vesicle-mediated transport	1/9	0.0667931	0.224291	0	0	16.315	44.1508	PGAP1	0.111111	1.17527
GO_Biological_Process_2021	regulation of endothelial cell differentiation	1/9	0.0667931	0.224291	0	0	16.315	44.1508	ZEB1	0.111111	1.17527
GO_Biological_Process_2021	negative regulation of lipase activity	1/9	0.0667931	0.224291	0	0	16.315	44.1508	RGS2	0.111111	1.17527
GO_Biological_Process_2021	negative regulation of fibrinolysis	1/9	0.0667931	0.224291	0	0	16.315	44.1508	SERPINF2	0.111111	1.17527
GO_Biological_Process_2021	very-low-density lipoprotein particle remodeling	1/9	0.0667931	0.224291	0	0	16.315	44.1508	APOE	0.111111	1.17527
Reactome_2016	Activation of gene expression by SREBF (SREBP)	2/42	0.0410077	0.226785	0	0	6.55861	20.9482	HMGCS1;ELOVL6	0.047619	1.38713
Reactome_2016	Cooperation of PDCL (PhLP1) and TRiC/CCT in G-protein beta folding	2/42	0.0410077	0.226785	0	0	6.55861	20.9482	GNAO1;RGS6	0.047619	1.38713
Reactome_2016	Netrin-1 signaling	2/42	0.0410077	0.226785	0	0	6.55861	20.9482	TRPC5;RGMB	0.047619	1.38713
GO_Biological_Process_2021	negative regulation of cellular process	8/566	0.0696259	0.230148	0	0	1.90721	5.08198	CEBPA;FRZB;DUSP1;ITGA1;NUPR1;SSTR1;MT3;PLXNA4	0.0141343	1.15723
GO_Biological_Process_2021	icosanoid metabolic process	2/57	0.0706266	0.230148	0	0	4.76629	12.6323	FAAH;DPEP2	0.0350877	1.15103
GO_Biological_Process_2021	cellular response to peptide	2/57	0.0706266	0.230148	0	0	4.76629	12.6323	PRNP;ITGA4	0.0350877	1.15103
GO_Biological_Process_2021	carboxylic acid transport	2/57	0.0706266	0.230148	0	0	4.76629	12.6323	SLC7A8;SLC3A2	0.0350877	1.15103
GO_Biological_Process_2021	axon guidance	4/203	0.0707503	0.230148	0	0	2.65057	7.02029	ALCAM;GRB10;CXCR4;PLXNA4	0.0197044	1.15027
GO_Biological_Process_2021	cellular response to oxidative stress	3/125	0.0711482	0.230148	0	0	3.23361	8.54639	SELENOS;GPX8;MT3	0.024	1.14784
GO_Biological_Process_2021	regulation of protein secretion	3/125	0.0711482	0.230148	0	0	3.23361	8.54639	KCNJ11;GCG;APOE	0.024	1.14784
GO_Biological_Process_2021	synapse organization	3/126	0.072492	0.230148	0	0	3.20715	8.41647	SLITRK6;PAK3;GPC6	0.0238095	1.13971
GO_Biological_Process_2021	negative regulation of cell growth	3/126	0.072492	0.230148	0	0	3.20715	8.41647	MAP2;FRZB;MT3	0.0238095	1.13971
GO_Biological_Process_2021	positive regulation of protein binding	2/58	0.0727932	0.230148	0	0	4.68094	12.2647	BAMBI;APOE	0.0344828	1.13791
GO_Biological_Process_2021	muscle organ development	2/58	0.0727932	0.230148	0	0	4.68094	12.2647	EGR3;COL6A3	0.0344828	1.13791
GO_Biological_Process_2021	regulation of inflammatory response	4/206	0.0737901	0.230148	0	0	2.6108	6.80514	CEBPA;SELENOS;AHSG;APOE	0.0194175	1.132
GO_Biological_Process_2021	negative regulation of glycolytic process	1/10	0.0739353	0.230148	0	0	14.5015	37.77	NUPR1	0.1	1.13115
GO_Biological_Process_2021	regulation of carbohydrate biosynthetic process	1/10	0.0739353	0.230148	0	0	14.5015	37.77	SELENOS	0.1	1.13115
GO_Biological_Process_2021	negative regulation of protein exit from endoplasmic reticulum	1/10	0.0739353	0.230148	0	0	14.5015	37.77	INSIG1	0.1	1.13115
GO_Biological_Process_2021	cellular response to acetylcholine	1/10	0.0739353	0.230148	0	0	14.5015	37.77	LY6H	0.1	1.13115
GO_Biological_Process_2021	myelin maintenance	1/10	0.0739353	0.230148	0	0	14.5015	37.77	CXCR4	0.1	1.13115
GO_Biological_Process_2021	positive regulation of transcription by RNA polymerase III	1/10	0.0739353	0.230148	0	0	14.5015	37.77	CEBPA	0.1	1.13115
GO_Biological_Process_2021	leptin-mediated signaling pathway	1/10	0.0739353	0.230148	0	0	14.5015	37.77	MT3	0.1	1.13115
GO_Biological_Process_2021	cellular response to interleukin-4	1/10	0.0739353	0.230148	0	0	14.5015	37.77	TCF7	0.1	1.13115
GO_Biological_Process_2021	regulation of glycoprotein biosynthetic process	1/10	0.0739353	0.230148	0	0	14.5015	37.77	MT3	0.1	1.13115
GO_Biological_Process_2021	cellular response to prostaglandin stimulus	1/10	0.0739353	0.230148	0	0	14.5015	37.77	PTGFR	0.1	1.13115
GO_Biological_Process_2021	neuron projection maintenance	1/10	0.0739353	0.230148	0	0	14.5015	37.77	PRNP	0.1	1.13115
GO_Biological_Process_2021	chondroitin sulfate proteoglycan metabolic process	1/10	0.0739353	0.230148	0	0	14.5015	37.77	B3GAT2	0.1	1.13115
GO_Biological_Process_2021	chylomicron assembly	1/10	0.0739353	0.230148	0	0	14.5015	37.77	APOE	0.1	1.13115
GO_Biological_Process_2021	dicarboxylic acid biosynthetic process	1/10	0.0739353	0.230148	0	0	14.5015	37.77	GLUD1	0.1	1.13115
GO_Biological_Process_2021	pinocytosis	1/10	0.0739353	0.230148	0	0	14.5015	37.77	AHSG	0.1	1.13115
GO_Biological_Process_2021	positive regulation of dendritic spine morphogenesis	1/10	0.0739353	0.230148	0	0	14.5015	37.77	CAMK2B	0.1	1.13115
GO_Biological_Process_2021	glycine transport	1/10	0.0739353	0.230148	0	0	14.5015	37.77	SLC7A8	0.1	1.13115
GO_Biological_Process_2021	removal of superoxide radicals	1/10	0.0739353	0.230148	0	0	14.5015	37.77	MT3	0.1	1.13115
GO_Biological_Process_2021	response to interleukin-4	1/10	0.0739353	0.230148	0	0	14.5015	37.77	TCF7	0.1	1.13115
GO_Biological_Process_2021	negative regulation of purine nucleotide metabolic process	1/10	0.0739353	0.230148	0	0	14.5015	37.77	NUPR1	0.1	1.13115
GO_Biological_Process_2021	regulation of epithelial cell apoptotic process	1/10	0.0739353	0.230148	0	0	14.5015	37.77	NUPR1	0.1	1.13115
Reactome_2016	Cell surface interactions at the vascular wall	3/101	0.0424929	0.231491	0	0	4.03041	12.7297	ITGA4;SLC7A8;SLC3A2	0.029703	1.37168
GO_Biological_Process_2021	positive regulation of apoptotic signaling pathway	2/59	0.0749811	0.231865	0	0	4.59858	11.9127	NUPR1;TPD52L1	0.0338983	1.12505
GO_Biological_Process_2021	response to reactive oxygen species	2/59	0.0749811	0.231865	0	0	4.59858	11.9127	HBB;APOE	0.0338983	1.12505
GO_Biological_Process_2021	negative regulation of autophagy	2/59	0.0749811	0.231865	0	0	4.59858	11.9127	NUPR1;MT3	0.0338983	1.12505
Reactome_2016	Phase 0 - rapid depolarisation	2/44	0.0446148	0.235921	0	0	6.24566	19.4221	CAMK2B;SCN9A	0.0454545	1.35052
Reactome_2016	Fructose metabolism	1/6	0.0450364	0.235921	0	0	26.1079	80.9419	SORD	0.166667	1.34644
Reactome_2016	Platelet activation, signaling and aggregation	5/253	0.0452451	0.235921	0	0	2.66987	8.26502	AHSG;SERPINF2;FLNA;SCG3;TUBA4A	0.0197628	1.34443
GO_Biological_Process_2021	regulation of transcription by RNA polymerase II	23/2206	0.0768597	0.236514	0	0	1.43159	3.67315	CEBPA;EGR3;ONECUT2;ZBTB16;SERPINF2;TCF7;RFX2;TGFA;GATA4;PAX6;MLXIPL;TOX3;ZEB1;GAL;ID2;ID4;NFE2L3;ID3;APOE;MXD1;TOX;JUNB;SOX5	0.0104261	1.1143
GO_Biological_Process_2021	regulation of cell cycle	5/296	0.0774082	0.236514	0	0	2.27036	5.80909	MLXIPL;DUSP1;ID2;NUPR1;JUNB	0.0168919	1.11121
GO_Biological_Process_2021	G2/M transition of mitotic cell cycle	3/130	0.0779802	0.236514	0	0	3.10551	7.92309	CDC25C;TPD52L1;TUBA4A	0.0230769	1.10802
GO_Biological_Process_2021	cell cycle G2/M phase transition	3/131	0.0793801	0.236514	0	0	3.08109	7.80598	CDC25C;TPD52L1;TUBA4A	0.0229008	1.10029
GO_Biological_Process_2021	lipoprotein biosynthetic process	1/11	0.0810232	0.236514	0	0	13.0507	32.7966	APOE	0.0909091	1.09139
GO_Biological_Process_2021	cellular response to superoxide	1/11	0.0810232	0.236514	0	0	13.0507	32.7966	MT3	0.0909091	1.09139
GO_Biological_Process_2021	negative regulation of programmed necrotic cell death	1/11	0.0810232	0.236514	0	0	13.0507	32.7966	NUPR1	0.0909091	1.09139
GO_Biological_Process_2021	negative regulation of interleukin-17 production	1/11	0.0810232	0.236514	0	0	13.0507	32.7966	PRNP	0.0909091	1.09139
GO_Biological_Process_2021	atrial septum morphogenesis	1/11	0.0810232	0.236514	0	0	13.0507	32.7966	GATA4	0.0909091	1.09139
GO_Biological_Process_2021	negative regulation of activated T cell proliferation	1/11	0.0810232	0.236514	0	0	13.0507	32.7966	PRNP	0.0909091	1.09139
GO_Biological_Process_2021	positive regulation of transforming growth factor beta production	1/11	0.0810232	0.236514	0	0	13.0507	32.7966	SERPINF2	0.0909091	1.09139
GO_Biological_Process_2021	cytidine to uridine editing	1/11	0.0810232	0.236514	0	0	13.0507	32.7966	A1CF	0.0909091	1.09139
GO_Biological_Process_2021	lipoprotein catabolic process	1/11	0.0810232	0.236514	0	0	13.0507	32.7966	APOE	0.0909091	1.09139
GO_Biological_Process_2021	mesonephros development	1/11	0.0810232	0.236514	0	0	13.0507	32.7966	ZBTB16	0.0909091	1.09139
GO_Biological_Process_2021	positive regulation of phospholipid transport	1/11	0.0810232	0.236514	0	0	13.0507	32.7966	APOE	0.0909091	1.09139
GO_Biological_Process_2021	positive regulation of epidermal growth factor-activated receptor activity	1/11	0.0810232	0.236514	0	0	13.0507	32.7966	TGFA	0.0909091	1.09139
GO_Biological_Process_2021	regulation of microtubule-based movement	1/11	0.0810232	0.236514	0	0	13.0507	32.7966	MAP2	0.0909091	1.09139
GO_Biological_Process_2021	regulation of phospholipase activity	1/11	0.0810232	0.236514	0	0	13.0507	32.7966	RGS2	0.0909091	1.09139
GO_Biological_Process_2021	positive regulation by host of viral process	1/11	0.0810232	0.236514	0	0	13.0507	32.7966	APOE	0.0909091	1.09139
GO_Biological_Process_2021	regulation of synapse maturation	1/11	0.0810232	0.236514	0	0	13.0507	32.7966	CAMK2B	0.0909091	1.09139
GO_Biological_Process_2021	positive regulation of cellular respiration	1/11	0.0810232	0.236514	0	0	13.0507	32.7966	NUPR1	0.0909091	1.09139
GO_Biological_Process_2021	glutamine family amino acid biosynthetic process	1/11	0.0810232	0.236514	0	0	13.0507	32.7966	GLUD1	0.0909091	1.09139
GO_Biological_Process_2021	glutathione biosynthetic process	1/11	0.0810232	0.236514	0	0	13.0507	32.7966	CHAC2	0.0909091	1.09139
GO_Biological_Process_2021	regulation of long-term neuronal synaptic plasticity	1/11	0.0810232	0.236514	0	0	13.0507	32.7966	CAMK2B	0.0909091	1.09139
GO_Biological_Process_2021	positive regulation of macrophage differentiation	1/11	0.0810232	0.236514	0	0	13.0507	32.7966	ID2	0.0909091	1.09139
GO_Biological_Process_2021	positive regulation of integrin activation	1/11	0.0810232	0.236514	0	0	13.0507	32.7966	CDH17	0.0909091	1.09139
GO_Biological_Process_2021	response to sterol	1/11	0.0810232	0.236514	0	0	13.0507	32.7966	INSIG1	0.0909091	1.09139
GO_Biological_Process_2021	glucose metabolic process	2/62	0.0816683	0.237903	0	0	4.36799	10.9422	KCNJ11;SORD	0.0322581	1.08795
GO_Biological_Process_2021	regulation of cell motility	3/133	0.0822127	0.238994	0	0	3.03338	7.57875	SERPINE2;FLNA;PLXNA4	0.0225564	1.08506
GO_Biological_Process_2021	vesicle coating	2/63	0.0839371	0.240576	0	0	4.29617	10.6446	CTSZ;TGFA	0.031746	1.07605
GO_Biological_Process_2021	COPII vesicle coating	2/63	0.0839371	0.240576	0	0	4.29617	10.6446	CTSZ;TGFA	0.031746	1.07605
GO_Biological_Process_2021	neuropeptide signaling pathway	2/63	0.0839371	0.240576	0	0	4.29617	10.6446	GAL;SSTR1	0.031746	1.07605
GO_Biological_Process_2021	vesicle targeting, rough ER to cis-Golgi	2/63	0.0839371	0.240576	0	0	4.29617	10.6446	CTSZ;TGFA	0.031746	1.07605
GO_Biological_Process_2021	chemical synaptic transmission	5/306	0.0862892	0.240576	0	0	2.19381	5.37495	GRM4;GRM7;RIMBP2;GRIK1;APOE	0.0163399	1.06404
GO_Biological_Process_2021	modulation by host of viral process	1/12	0.0880572	0.240576	0	0	11.8636	28.8259	APOE	0.0833333	1.05523
GO_Biological_Process_2021	regulation of cholesterol esterification	1/12	0.0880572	0.240576	0	0	11.8636	28.8259	APOE	0.0833333	1.05523
GO_Biological_Process_2021	negative regulation of amyloid fibril formation	1/12	0.0880572	0.240576	0	0	11.8636	28.8259	APOE	0.0833333	1.05523
GO_Biological_Process_2021	negative regulation of microtubule polymerization	1/12	0.0880572	0.240576	0	0	11.8636	28.8259	MAP2	0.0833333	1.05523
GO_Biological_Process_2021	maintenance of protein localization in endoplasmic reticulum	1/12	0.0880572	0.240576	0	0	11.8636	28.8259	INSIG1	0.0833333	1.05523
GO_Biological_Process_2021	tricarboxylic acid metabolic process	1/12	0.0880572	0.240576	0	0	11.8636	28.8259	GLUD1	0.0833333	1.05523
GO_Biological_Process_2021	positive regulation of cardiocyte differentiation	1/12	0.0880572	0.240576	0	0	11.8636	28.8259	GATA4	0.0833333	1.05523
GO_Biological_Process_2021	gas transport	1/12	0.0880572	0.240576	0	0	11.8636	28.8259	HBB	0.0833333	1.05523
GO_Biological_Process_2021	regulation of vascular associated smooth muscle cell migration	1/12	0.0880572	0.240576	0	0	11.8636	28.8259	PRKG1	0.0833333	1.05523
GO_Biological_Process_2021	glutamine metabolic process	1/12	0.0880572	0.240576	0	0	11.8636	28.8259	GLUD1	0.0833333	1.05523
GO_Biological_Process_2021	posttranslational protein targeting to endoplasmic reticulum membrane	1/12	0.0880572	0.240576	0	0	11.8636	28.8259	SGTB	0.0833333	1.05523
GO_Biological_Process_2021	negative regulation of calcineurin-mediated signaling	1/12	0.0880572	0.240576	0	0	11.8636	28.8259	PRNP	0.0833333	1.05523
GO_Biological_Process_2021	negative regulation of calcineurin-NFAT signaling cascade	1/12	0.0880572	0.240576	0	0	11.8636	28.8259	PRNP	0.0833333	1.05523
GO_Biological_Process_2021	negative regulation of cardiac muscle hypertrophy	1/12	0.0880572	0.240576	0	0	11.8636	28.8259	RGS2	0.0833333	1.05523
GO_Biological_Process_2021	pyrimidine nucleobase metabolic process	1/12	0.0880572	0.240576	0	0	11.8636	28.8259	DPYSL3	0.0833333	1.05523
GO_Biological_Process_2021	angiotensin maturation	1/12	0.0880572	0.240576	0	0	11.8636	28.8259	CTSZ	0.0833333	1.05523
GO_Biological_Process_2021	regulation of angiotensin levels in blood	1/12	0.0880572	0.240576	0	0	11.8636	28.8259	CTSZ	0.0833333	1.05523
GO_Biological_Process_2021	negative regulation of leukocyte apoptotic process	1/12	0.0880572	0.240576	0	0	11.8636	28.8259	SELENOS	0.0833333	1.05523
GO_Biological_Process_2021	negative regulation of leukocyte chemotaxis	1/12	0.0880572	0.240576	0	0	11.8636	28.8259	DUSP1	0.0833333	1.05523
GO_Biological_Process_2021	calcium ion-regulated exocytosis of neurotransmitter	1/12	0.0880572	0.240576	0	0	11.8636	28.8259	RIMS2	0.0833333	1.05523
GO_Biological_Process_2021	phospholipid efflux	1/12	0.0880572	0.240576	0	0	11.8636	28.8259	APOE	0.0833333	1.05523
GO_Biological_Process_2021	regulation of oxidative stress-induced cell death	1/12	0.0880572	0.240576	0	0	11.8636	28.8259	GATA4	0.0833333	1.05523
GO_Biological_Process_2021	dermatan sulfate biosynthetic process	1/12	0.0880572	0.240576	0	0	11.8636	28.8259	VCAN	0.0833333	1.05523
GO_Biological_Process_2021	nonribosomal peptide biosynthetic process	1/12	0.0880572	0.240576	0	0	11.8636	28.8259	CHAC2	0.0833333	1.05523
GO_Biological_Process_2021	negative regulation of oxidoreductase activity	1/12	0.0880572	0.240576	0	0	11.8636	28.8259	MT3	0.0833333	1.05523
GO_Biological_Process_2021	positive regulation of neuroinflammatory response	1/12	0.0880572	0.240576	0	0	11.8636	28.8259	NUPR1	0.0833333	1.05523
GO_Biological_Process_2021	positive regulation of cell cycle	2/66	0.0908566	0.243567	0	0	4.09416	9.81974	ASNS;NUPR1	0.030303	1.04164
GO_Biological_Process_2021	anion transmembrane transport	2/67	0.0931994	0.243567	0	0	4.03097	9.56556	SLC7A8;SLC3A2	0.0298507	1.03059
GO_Biological_Process_2021	cilium assembly	5/314	0.0937639	0.243567	0	0	2.13614	5.05619	RFX2;SCLT1;FLNA;SEPTIN6;TUBA4A	0.0159236	1.02796
GO_Biological_Process_2021	semaphorin-plexin signaling pathway involved in neuron projection guidance	1/13	0.0950378	0.243567	0	0	10.8745	25.5928	PLXNA4	0.0769231	1.0221
GO_Biological_Process_2021	regulation of protein exit from endoplasmic reticulum	1/13	0.0950378	0.243567	0	0	10.8745	25.5928	INSIG1	0.0769231	1.0221
GO_Biological_Process_2021	fatty acid elongation	1/13	0.0950378	0.243567	0	0	10.8745	25.5928	ELOVL6	0.0769231	1.0221
GO_Biological_Process_2021	regulation of T cell differentiation in thymus	1/13	0.0950378	0.243567	0	0	10.8745	25.5928	TOX	0.0769231	1.0221
GO_Biological_Process_2021	positive regulation of fatty acid biosynthetic process	1/13	0.0950378	0.243567	0	0	10.8745	25.5928	MLXIPL	0.0769231	1.0221
GO_Biological_Process_2021	high-density lipoprotein particle assembly	1/13	0.0950378	0.243567	0	0	10.8745	25.5928	APOE	0.0769231	1.0221
GO_Biological_Process_2021	response to nitric oxide	1/13	0.0950378	0.243567	0	0	10.8745	25.5928	MT3	0.0769231	1.0221
GO_Biological_Process_2021	positive regulation of lipid transport	1/13	0.0950378	0.243567	0	0	10.8745	25.5928	APOE	0.0769231	1.0221
GO_Biological_Process_2021	positive regulation of steroid metabolic process	1/13	0.0950378	0.243567	0	0	10.8745	25.5928	APOE	0.0769231	1.0221
GO_Biological_Process_2021	regulation of oxidoreductase activity	1/13	0.0950378	0.243567	0	0	10.8745	25.5928	MT3	0.0769231	1.0221
GO_Biological_Process_2021	triglyceride-rich lipoprotein particle remodeling	1/13	0.0950378	0.243567	0	0	10.8745	25.5928	APOE	0.0769231	1.0221
GO_Biological_Process_2021	positive regulation of vascular endothelial cell proliferation	1/13	0.0950378	0.243567	0	0	10.8745	25.5928	ITGA4	0.0769231	1.0221
GO_Biological_Process_2021	UV-damage excision repair	1/13	0.0950378	0.243567	0	0	10.8745	25.5928	H2AW	0.0769231	1.0221
GO_Biological_Process_2021	very long-chain fatty acid biosynthetic process	1/13	0.0950378	0.243567	0	0	10.8745	25.5928	ELOVL6	0.0769231	1.0221
GO_Biological_Process_2021	muscle tissue development	1/13	0.0950378	0.243567	0	0	10.8745	25.5928	PGM5	0.0769231	1.0221
GO_Biological_Process_2021	negative regulation of alcohol biosynthetic process	1/13	0.0950378	0.243567	0	0	10.8745	25.5928	APOE	0.0769231	1.0221
GO_Biological_Process_2021	embryonic appendage morphogenesis	1/13	0.0950378	0.243567	0	0	10.8745	25.5928	FBXW4	0.0769231	1.0221
GO_Biological_Process_2021	entry into host	1/13	0.0950378	0.243567	0	0	10.8745	25.5928	CXCR4	0.0769231	1.0221
GO_Biological_Process_2021	dermatan sulfate metabolic process	1/13	0.0950378	0.243567	0	0	10.8745	25.5928	VCAN	0.0769231	1.0221
GO_Biological_Process_2021	negative regulation of mononuclear cell migration	1/13	0.0950378	0.243567	0	0	10.8745	25.5928	DUSP1	0.0769231	1.0221
GO_Biological_Process_2021	regulation of mitotic cell cycle spindle assembly checkpoint	1/13	0.0950378	0.243567	0	0	10.8745	25.5928	DUSP1	0.0769231	1.0221
GO_Biological_Process_2021	negative regulation of chromatin organization	1/13	0.0950378	0.243567	0	0	10.8745	25.5928	H1-3	0.0769231	1.0221
GO_Biological_Process_2021	negative regulation of chromatin silencing	1/13	0.0950378	0.243567	0	0	10.8745	25.5928	H1-3	0.0769231	1.0221
GO_Biological_Process_2021	negative regulation of gene silencing	1/13	0.0950378	0.243567	0	0	10.8745	25.5928	H1-3	0.0769231	1.0221
GO_Biological_Process_2021	negative regulation of macromolecule biosynthetic process	1/13	0.0950378	0.243567	0	0	10.8745	25.5928	SELENOS	0.0769231	1.0221
GO_Biological_Process_2021	negative regulation of autophagosome assembly	1/13	0.0950378	0.243567	0	0	10.8745	25.5928	NUPR1	0.0769231	1.0221
GO_Biological_Process_2021	cardiac right ventricle morphogenesis	1/13	0.0950378	0.243567	0	0	10.8745	25.5928	GATA4	0.0769231	1.0221
GO_Biological_Process_2021	regulation of fibrinolysis	1/13	0.0950378	0.243567	0	0	10.8745	25.5928	SERPINF2	0.0769231	1.0221
GO_Biological_Process_2021	chondroitin sulfate catabolic process	1/13	0.0950378	0.243567	0	0	10.8745	25.5928	VCAN	0.0769231	1.0221
GO_Biological_Process_2021	cytoplasmic sequestering of protein	1/13	0.0950378	0.243567	0	0	10.8745	25.5928	FLNA	0.0769231	1.0221
GO_Biological_Process_2021	cellular component maintenance	1/13	0.0950378	0.243567	0	0	10.8745	25.5928	PRNP	0.0769231	1.0221
GO_Biological_Process_2021	canonical Wnt signaling pathway	2/68	0.0955596	0.244459	0	0	3.9697	9.32087	FRZB;TCF7	0.0294118	1.01973
GO_Biological_Process_2021	nitrogen compound transport	3/143	0.0970107	0.246504	0	0	2.81529	6.56788	SLC7A8;HBB;SLC3A2	0.020979	1.01318
GO_Biological_Process_2021	cellular response to decreased oxygen levels	2/69	0.097937	0.246504	0	0	3.91025	9.0852	FABP1;MT3	0.0289855	1.00905
GO_Biological_Process_2021	negative regulation of cellular catabolic process	2/69	0.097937	0.246504	0	0	3.91025	9.0852	NUPR1;MT3	0.0289855	1.00905
GO_Biological_Process_2021	cell chemotaxis	2/69	0.097937	0.246504	0	0	3.91025	9.0852	EGR3;CXCR4	0.0289855	1.00905
GO_Biological_Process_2021	cilium organization	4/228	0.0980436	0.246504	0	0	2.35175	5.46157	RFX2;SCLT1;FLNA;SEPTIN6	0.0175439	1.00858
GO_Biological_Process_2021	COPII-coated vesicle budding	2/70	0.100331	0.246504	0	0	3.85255	8.8581	CTSZ;TGFA	0.0285714	0.998565
GO_Biological_Process_2021	sterol metabolic process	2/70	0.100331	0.246504	0	0	3.85255	8.8581	INSIG1;APOE	0.0285714	0.998565
GO_Biological_Process_2021	cellular protein metabolic process	6/417	0.101315	0.246504	0	0	1.93019	4.41921	VCAN;AHSG;SCG3;APOE;AFP;ZDHHC2	0.0143885	0.994328
GO_Biological_Process_2021	apoptotic process	4/231	0.101609	0.246504	0	0	2.32031	5.30569	TRPC5;ZBTB16;CXCR4;CIDEC	0.017316	0.993068
GO_Biological_Process_2021	covalent chromatin modification	1/14	0.101965	0.246504	0	0	10.0374	22.9167	MT3	0.0714286	0.991548
GO_Biological_Process_2021	cellular copper ion homeostasis	1/14	0.101965	0.246504	0	0	10.0374	22.9167	PRNP	0.0714286	0.991548
GO_Biological_Process_2021	renal absorption	1/14	0.101965	0.246504	0	0	10.0374	22.9167	HBB	0.0714286	0.991548
GO_Biological_Process_2021	relaxation of muscle	1/14	0.101965	0.246504	0	0	10.0374	22.9167	RGS2	0.0714286	0.991548
GO_Biological_Process_2021	peptidyl-serine dephosphorylation	1/14	0.101965	0.246504	0	0	10.0374	22.9167	DUSP1	0.0714286	0.991548
GO_Biological_Process_2021	regulation of nitric-oxide synthase biosynthetic process	1/14	0.101965	0.246504	0	0	10.0374	22.9167	SELENOS	0.0714286	0.991548
GO_Biological_Process_2021	dicarboxylic acid catabolic process	1/14	0.101965	0.246504	0	0	10.0374	22.9167	GLUD1	0.0714286	0.991548
GO_Biological_Process_2021	cGMP-mediated signaling	1/14	0.101965	0.246504	0	0	10.0374	22.9167	APOE	0.0714286	0.991548
GO_Biological_Process_2021	regulation of integrin-mediated signaling pathway	1/14	0.101965	0.246504	0	0	10.0374	22.9167	FLNA	0.0714286	0.991548
GO_Biological_Process_2021	negative regulation of smooth muscle cell migration	1/14	0.101965	0.246504	0	0	10.0374	22.9167	PRKG1	0.0714286	0.991548
GO_Biological_Process_2021	negative regulation of cell activation	1/14	0.101965	0.246504	0	0	10.0374	22.9167	APOE	0.0714286	0.991548
GO_Biological_Process_2021	atrial septum development	1/14	0.101965	0.246504	0	0	10.0374	22.9167	GATA4	0.0714286	0.991548
GO_Biological_Process_2021	positive regulation of insulin secretion involved in cellular response to glucose stimulus	1/14	0.101965	0.246504	0	0	10.0374	22.9167	GCG	0.0714286	0.991548
GO_Biological_Process_2021	negative regulation of bone mineralization	1/14	0.101965	0.246504	0	0	10.0374	22.9167	AHSG	0.0714286	0.991548
GO_Biological_Process_2021	response to chemokine	1/14	0.101965	0.246504	0	0	10.0374	22.9167	DUSP1	0.0714286	0.991548
GO_Biological_Process_2021	regulation of response to endoplasmic reticulum stress	1/14	0.101965	0.246504	0	0	10.0374	22.9167	NUPR1	0.0714286	0.991548
GO_Biological_Process_2021	positive regulation of long-term synaptic potentiation	1/14	0.101965	0.246504	0	0	10.0374	22.9167	ZDHHC2	0.0714286	0.991548
GO_Biological_Process_2021	positive regulation of potassium ion transmembrane transporter activity	1/14	0.101965	0.246504	0	0	10.0374	22.9167	GAL	0.0714286	0.991548
GO_Biological_Process_2021	striated muscle cell development	1/14	0.101965	0.246504	0	0	10.0374	22.9167	PGM5	0.0714286	0.991548
GO_Biological_Process_2021	synaptic membrane adhesion	1/14	0.101965	0.246504	0	0	10.0374	22.9167	GPC6	0.0714286	0.991548
GO_Biological_Process_2021	manganese ion transport	1/14	0.101965	0.246504	0	0	10.0374	22.9167	TRPC5	0.0714286	0.991548
GO_Biological_Process_2021	monoacylglycerol metabolic process	1/14	0.101965	0.246504	0	0	10.0374	22.9167	FAAH	0.0714286	0.991548
GO_Biological_Process_2021	sodium-independent organic anion transport	1/14	0.101965	0.246504	0	0	10.0374	22.9167	SLCO3A1	0.0714286	0.991548
GO_Biological_Process_2021	regulation of glycolytic process	2/71	0.102741	0.247529	0	0	3.79653	8.63915	MLXIPL;NUPR1	0.028169	0.988255
GO_Biological_Process_2021	cholesterol homeostasis	2/71	0.102741	0.247529	0	0	3.79653	8.63915	INSIG1;APOE	0.028169	0.988255
Reactome_2016	Binding of TCF/LEF:CTNNB1 to target gene promoters	1/7	0.052344	0.248124	0	0	21.7555	64.1769	TCF7	0.142857	1.28113
Reactome_2016	Neurofascin interactions	1/7	0.052344	0.248124	0	0	21.7555	64.1769	NFASC	0.142857	1.28113
Reactome_2016	Attachment of GPI anchor to uPAR	1/7	0.052344	0.248124	0	0	21.7555	64.1769	PGAP1	0.142857	1.28113
Reactome_2016	Defective CHST14 causes EDS, musculocontractural type	1/7	0.052344	0.248124	0	0	21.7555	64.1769	VCAN	0.142857	1.28113
Reactome_2016	Defective CHSY1 causes TPBS	1/7	0.052344	0.248124	0	0	21.7555	64.1769	VCAN	0.142857	1.28113
Reactome_2016	Defective CHST3 causes SEDCJD	1/7	0.052344	0.248124	0	0	21.7555	64.1769	VCAN	0.142857	1.28113
Reactome_2016	PP2A-mediated dephosphorylation of key metabolic factors	1/7	0.052344	0.248124	0	0	21.7555	64.1769	MLXIPL	0.142857	1.28113
GO_Biological_Process_2021	positive regulation of intracellular protein transport	3/148	0.104788	0.250635	0	0	2.71752	6.13021	PRNP;FLNA;ZDHHC2	0.0202703	0.979687
GO_Biological_Process_2021	negative regulation of supramolecular fiber organization	2/72	0.105168	0.250635	0	0	3.7421	8.42796	MAP2;APOE	0.0277778	0.978118
GO_Biological_Process_2021	sterol homeostasis	2/72	0.105168	0.250635	0	0	3.7421	8.42796	INSIG1;APOE	0.0277778	0.978118
GO_Biological_Process_2021	cell junction organization	2/72	0.105168	0.250635	0	0	3.7421	8.42796	FLNA;PAK3	0.0277778	0.978118
GO_Biological_Process_2021	negative regulation of epithelial cell proliferation	2/72	0.105168	0.250635	0	0	3.7421	8.42796	NUPR1;APOE	0.0277778	0.978118
GO_Biological_Process_2021	negative regulation of cell adhesion	2/73	0.107609	0.250635	0	0	3.68921	8.22416	DUSP1;PLXNA4	0.0273973	0.96815
GO_Biological_Process_2021	regulation of actin filament-based process	2/73	0.107609	0.250635	0	0	3.68921	8.22416	CCDC88A;PAK3	0.0273973	0.96815
GO_Biological_Process_2021	regulation of hydrolase activity	2/73	0.107609	0.250635	0	0	3.68921	8.22416	PRKG1;PLXNA4	0.0273973	0.96815
GO_Biological_Process_2021	positive regulation of JNK cascade	2/73	0.107609	0.250635	0	0	3.68921	8.22416	SERPINF2;TPD52L1	0.0273973	0.96815
GO_Biological_Process_2021	positive regulation of synaptic transmission	2/73	0.107609	0.250635	0	0	3.68921	8.22416	RIMS2;ZDHHC2	0.0273973	0.96815
GO_Biological_Process_2021	ubiquitin-dependent ERAD pathway	2/73	0.107609	0.250635	0	0	3.68921	8.22416	SELENOS;SGTB	0.0273973	0.96815
GO_Biological_Process_2021	response to cytokine	3/150	0.107967	0.250635	0	0	2.68027	5.96611	DPYSL3;CXCR4;LIFR	0.02	0.96671
GO_Biological_Process_2021	acetyl-CoA metabolic process	1/15	0.10884	0.250635	0	0	9.32002	20.6706	HMGCS1	0.0666667	0.963211
GO_Biological_Process_2021	acute-phase response	1/15	0.10884	0.250635	0	0	9.32002	20.6706	AHSG	0.0666667	0.963211
GO_Biological_Process_2021	dermatan sulfate proteoglycan biosynthetic process	1/15	0.10884	0.250635	0	0	9.32002	20.6706	VCAN	0.0666667	0.963211
GO_Biological_Process_2021	nucleosome positioning	1/15	0.10884	0.250635	0	0	9.32002	20.6706	H1-3	0.0666667	0.963211
GO_Biological_Process_2021	endoplasmic reticulum to cytosol transport	1/15	0.10884	0.250635	0	0	9.32002	20.6706	SELENOS	0.0666667	0.963211
GO_Biological_Process_2021	fibrinolysis	1/15	0.10884	0.250635	0	0	9.32002	20.6706	SERPINF2	0.0666667	0.963211
GO_Biological_Process_2021	ganglioside biosynthetic process	1/15	0.10884	0.250635	0	0	9.32002	20.6706	ST6GALNAC5	0.0666667	0.963211
GO_Biological_Process_2021	glucosamine-containing compound metabolic process	1/15	0.10884	0.250635	0	0	9.32002	20.6706	CHIA	0.0666667	0.963211
GO_Biological_Process_2021	positive regulation of membrane protein ectodomain proteolysis	1/15	0.10884	0.250635	0	0	9.32002	20.6706	APOE	0.0666667	0.963211
GO_Biological_Process_2021	mammary gland epithelium development	1/15	0.10884	0.250635	0	0	9.32002	20.6706	ID2	0.0666667	0.963211
GO_Biological_Process_2021	membrane repolarization during cardiac muscle cell action potential	1/15	0.10884	0.250635	0	0	9.32002	20.6706	KCNJ8	0.0666667	0.963211
GO_Biological_Process_2021	regulation of macrophage differentiation	1/15	0.10884	0.250635	0	0	9.32002	20.6706	ID2	0.0666667	0.963211
GO_Biological_Process_2021	central nervous system neuron development	1/15	0.10884	0.250635	0	0	9.32002	20.6706	MAP2	0.0666667	0.963211
GO_Biological_Process_2021	regulation of amyloid fibril formation	1/15	0.10884	0.250635	0	0	9.32002	20.6706	APOE	0.0666667	0.963211
GO_Biological_Process_2021	negative regulation of endoplasmic reticulum stress-induced intrinsic apoptotic signaling pathway	1/15	0.10884	0.250635	0	0	9.32002	20.6706	SELENOS	0.0666667	0.963211
GO_Biological_Process_2021	regulation of peptide hormone secretion	2/74	0.110066	0.25222	0	0	3.63779	8.0274	KCNJ11;GCG	0.027027	0.958345
GO_Biological_Process_2021	regulation of stress fiber assembly	2/74	0.110066	0.25222	0	0	3.63779	8.0274	CCDC88A;SERPINF2	0.027027	0.958345
GO_Biological_Process_2021	sphingolipid biosynthetic process	2/74	0.110066	0.25222	0	0	3.63779	8.0274	ELOVL6;ST6GALNAC5	0.027027	0.958345
Reactome_2016	Amino acid and oligopeptide SLC transporters	2/49	0.0541167	0.253239	0	0	5.57982	16.2742	SLC7A8;SLC3A2	0.0408163	1.26667
GO_Biological_Process_2021	negative regulation of transcription, DNA-templated	11/948	0.111281	0.25459	0	0	1.56335	3.43264	MLXIPL;CEBPA;ZEB1;ZBTB16;ID2;ID4;FLNA;ID3;PAX6;MXD1;MT3	0.0116034	0.953577
GO_Biological_Process_2021	positive regulation of protein kinase activity	3/154	0.114434	0.255876	0	0	2.60874	5.65511	PRNP;CCDC88A;PAK3	0.0194805	0.941443
GO_Biological_Process_2021	positive regulation of collagen biosynthetic process	1/16	0.115662	0.255876	0	0	8.69825	18.7628	SERPINF2	0.0625	0.936808
GO_Biological_Process_2021	regulation of systemic arterial blood pressure	1/16	0.115662	0.255876	0	0	8.69825	18.7628	KLK1	0.0625	0.936808
GO_Biological_Process_2021	epiboly involved in wound healing	1/16	0.115662	0.255876	0	0	8.69825	18.7628	FLNA	0.0625	0.936808
GO_Biological_Process_2021	porphyrin-containing compound catabolic process	1/16	0.115662	0.255876	0	0	8.69825	18.7628	FABP1	0.0625	0.936808
GO_Biological_Process_2021	regulation of neurotransmitter transport	1/16	0.115662	0.255876	0	0	8.69825	18.7628	CPLX2	0.0625	0.936808
GO_Biological_Process_2021	digestive tract morphogenesis	1/16	0.115662	0.255876	0	0	8.69825	18.7628	ID2	0.0625	0.936808
GO_Biological_Process_2021	dendritic spine morphogenesis	1/16	0.115662	0.255876	0	0	8.69825	18.7628	PAK3	0.0625	0.936808
GO_Biological_Process_2021	dendritic cell chemotaxis	1/16	0.115662	0.255876	0	0	8.69825	18.7628	CXCR4	0.0625	0.936808
GO_Biological_Process_2021	neuron projection organization	1/16	0.115662	0.255876	0	0	8.69825	18.7628	PRNP	0.0625	0.936808
GO_Biological_Process_2021	cellular response to sterol	1/16	0.115662	0.255876	0	0	8.69825	18.7628	INSIG1	0.0625	0.936808
GO_Biological_Process_2021	regulation of chromatin silencing	1/16	0.115662	0.255876	0	0	8.69825	18.7628	H1-3	0.0625	0.936808
GO_Biological_Process_2021	regulation of amyloid-beta clearance	1/16	0.115662	0.255876	0	0	8.69825	18.7628	APOE	0.0625	0.936808
GO_Biological_Process_2021	negative regulation of epithelial cell differentiation	1/16	0.115662	0.255876	0	0	8.69825	18.7628	ZEB1	0.0625	0.936808
GO_Biological_Process_2021	glycosphingolipid biosynthetic process	1/16	0.115662	0.255876	0	0	8.69825	18.7628	ST6GALNAC5	0.0625	0.936808
GO_Biological_Process_2021	glutamine family amino acid catabolic process	1/16	0.115662	0.255876	0	0	8.69825	18.7628	GLUD1	0.0625	0.936808
GO_Biological_Process_2021	heme catabolic process	1/16	0.115662	0.255876	0	0	8.69825	18.7628	FABP1	0.0625	0.936808
GO_Biological_Process_2021	response to organophosphorus	1/16	0.115662	0.255876	0	0	8.69825	18.7628	KCNJ11	0.0625	0.936808
GO_Biological_Process_2021	retrograde axonal transport	1/16	0.115662	0.255876	0	0	8.69825	18.7628	KIF1A	0.0625	0.936808
GO_Biological_Process_2021	mesenchyme development	1/16	0.115662	0.255876	0	0	8.69825	18.7628	GATA4	0.0625	0.936808
GO_Biological_Process_2021	positive regulation of endothelial cell apoptotic process	1/16	0.115662	0.255876	0	0	8.69825	18.7628	ITGA4	0.0625	0.936808
GO_Biological_Process_2021	positive regulation of endothelial cell proliferation	2/77	0.117524	0.25918	0	0	3.49174	7.47621	EGR3;ITGA4	0.025974	0.929872
GO_Biological_Process_2021	inorganic cation import across plasma membrane	2/77	0.117524	0.25918	0	0	3.49174	7.47621	KCNJ11;KCNJ8	0.025974	0.929872
Reactome_2016	Ion homeostasis	2/51	0.0581004	0.262079	0	0	5.35153	15.2282	CAMK2B;KCNJ11	0.0392157	1.23582
Reactome_2016	AMPK inhibits chREBP transcriptional activation activity	1/8	0.0595961	0.262079	0	0	18.6466	52.5865	MLXIPL	0.125	1.22478
Reactome_2016	Erythrocytes take up oxygen and release carbon dioxide	1/8	0.0595961	0.262079	0	0	18.6466	52.5865	HBB	0.125	1.22478
Reactome_2016	Release of Hh-Np from the secreting cell	1/8	0.0595961	0.262079	0	0	18.6466	52.5865	GPC5	0.125	1.22478
Reactome_2016	ABC transporter disorders	1/8	0.0595961	0.262079	0	0	18.6466	52.5865	KCNJ11	0.125	1.22478
GO_Biological_Process_2021	copper ion homeostasis	1/17	0.122433	0.264088	0	0	8.15419	17.1254	PRNP	0.0588235	0.912101
GO_Biological_Process_2021	pyrimidine-containing compound catabolic process	1/17	0.122433	0.264088	0	0	8.15419	17.1254	DPYSL3	0.0588235	0.912101
GO_Biological_Process_2021	regulation of cholesterol biosynthetic process	1/17	0.122433	0.264088	0	0	8.15419	17.1254	APOE	0.0588235	0.912101
GO_Biological_Process_2021	cellular modified amino acid catabolic process	1/17	0.122433	0.264088	0	0	8.15419	17.1254	CHAC2	0.0588235	0.912101
GO_Biological_Process_2021	negative regulation of vascular associated smooth muscle cell proliferation	1/17	0.122433	0.264088	0	0	8.15419	17.1254	PRKG1	0.0588235	0.912101
GO_Biological_Process_2021	regulation of metal ion transport	1/17	0.122433	0.264088	0	0	8.15419	17.1254	CAMK2B	0.0588235	0.912101
GO_Biological_Process_2021	positive regulation of blood coagulation	1/17	0.122433	0.264088	0	0	8.15419	17.1254	SERPINF2	0.0588235	0.912101
GO_Biological_Process_2021	positive regulation of collagen metabolic process	1/17	0.122433	0.264088	0	0	8.15419	17.1254	SERPINF2	0.0588235	0.912101
GO_Biological_Process_2021	response to purine-containing compound	1/17	0.122433	0.264088	0	0	8.15419	17.1254	KCNJ11	0.0588235	0.912101
GO_Biological_Process_2021	retrograde protein transport, ER to cytosol	1/17	0.122433	0.264088	0	0	8.15419	17.1254	SELENOS	0.0588235	0.912101
GO_Biological_Process_2021	reverse cholesterol transport	1/17	0.122433	0.264088	0	0	8.15419	17.1254	APOE	0.0588235	0.912101
GO_Biological_Process_2021	positive regulation of macrophage activation	1/17	0.122433	0.264088	0	0	8.15419	17.1254	CEBPA	0.0588235	0.912101
GO_Biological_Process_2021	positive regulation of dendrite extension	1/17	0.122433	0.264088	0	0	8.15419	17.1254	RIMS2	0.0588235	0.912101
GO_Biological_Process_2021	regulation of neuron differentiation	2/79	0.122566	0.264088	0	0	3.40071	7.13845	ZEB1;ID2	0.0253165	0.911632
GO_Biological_Process_2021	regulation of ion transport	2/79	0.122566	0.264088	0	0	3.40071	7.13845	KCNJ11;KCNJ8	0.0253165	0.911632
Reactome_2016	Peptide ligand-binding receptors	4/193	0.061098	0.265485	0	0	2.79223	7.80506	GAL;PRLHR;CXCR4;SSTR1	0.0207254	1.21397
GO_Biological_Process_2021	amyloid precursor protein metabolic process	1/18	0.129152	0.266014	0	0	7.67415	15.7072	APOE	0.0555556	0.888898
GO_Biological_Process_2021	positive regulation of excitatory postsynaptic potential	1/18	0.129152	0.266014	0	0	7.67415	15.7072	RIMS2	0.0555556	0.888898
GO_Biological_Process_2021	water transport	1/18	0.129152	0.266014	0	0	7.67415	15.7072	UPK3A	0.0555556	0.888898
GO_Biological_Process_2021	ventricular cardiac muscle cell action potential	1/18	0.129152	0.266014	0	0	7.67415	15.7072	KCNJ8	0.0555556	0.888898
GO_Biological_Process_2021	synaptic transmission, glutamatergic	1/18	0.129152	0.266014	0	0	7.67415	15.7072	GRIK1	0.0555556	0.888898
GO_Biological_Process_2021	long-chain fatty-acyl-CoA biosynthetic process	1/18	0.129152	0.266014	0	0	7.67415	15.7072	ELOVL6	0.0555556	0.888898
GO_Biological_Process_2021	positive regulation of phosphoprotein phosphatase activity	1/18	0.129152	0.266014	0	0	7.67415	15.7072	ITGA1	0.0555556	0.888898
GO_Biological_Process_2021	leukocyte tethering or rolling	1/18	0.129152	0.266014	0	0	7.67415	15.7072	ITGA4	0.0555556	0.888898
GO_Biological_Process_2021	positive regulation of nitric-oxide synthase activity	1/18	0.129152	0.266014	0	0	7.67415	15.7072	APOE	0.0555556	0.888898
GO_Biological_Process_2021	positive regulation of nervous system process	1/18	0.129152	0.266014	0	0	7.67415	15.7072	RIMS2	0.0555556	0.888898
GO_Biological_Process_2021	interleukin-6-mediated signaling pathway	1/18	0.129152	0.266014	0	0	7.67415	15.7072	CEBPA	0.0555556	0.888898
GO_Biological_Process_2021	high-density lipoprotein particle remodeling	1/18	0.129152	0.266014	0	0	7.67415	15.7072	APOE	0.0555556	0.888898
GO_Biological_Process_2021	response to axon injury	1/18	0.129152	0.266014	0	0	7.67415	15.7072	DPYSL3	0.0555556	0.888898
GO_Biological_Process_2021	regulation of B cell differentiation	1/18	0.129152	0.266014	0	0	7.67415	15.7072	ID2	0.0555556	0.888898
GO_Biological_Process_2021	positive regulation of fatty acid metabolic process	1/18	0.129152	0.266014	0	0	7.67415	15.7072	MLXIPL	0.0555556	0.888898
GO_Biological_Process_2021	nitric oxide mediated signal transduction	1/18	0.129152	0.266014	0	0	7.67415	15.7072	APOE	0.0555556	0.888898
GO_Biological_Process_2021	base conversion or substitution editing	1/18	0.129152	0.266014	0	0	7.67415	15.7072	A1CF	0.0555556	0.888898
GO_Biological_Process_2021	regulation of catabolic process	1/18	0.129152	0.266014	0	0	7.67415	15.7072	ZDHHC2	0.0555556	0.888898
GO_Biological_Process_2021	cell migration involved in sprouting angiogenesis	1/18	0.129152	0.266014	0	0	7.67415	15.7072	EGR3	0.0555556	0.888898
GO_Biological_Process_2021	regulation of dendrite extension	1/18	0.129152	0.266014	0	0	7.67415	15.7072	RIMS2	0.0555556	0.888898
GO_Biological_Process_2021	cellular response to zinc ion	1/18	0.129152	0.266014	0	0	7.67415	15.7072	MT3	0.0555556	0.888898
GO_Biological_Process_2021	regulation of transforming growth factor beta production	1/18	0.129152	0.266014	0	0	7.67415	15.7072	SERPINF2	0.0555556	0.888898
GO_Biological_Process_2021	chromatin disassembly	1/18	0.129152	0.266014	0	0	7.67415	15.7072	H2AW	0.0555556	0.888898
GO_Biological_Process_2021	nucleosome disassembly	1/18	0.129152	0.266014	0	0	7.67415	15.7072	H2AW	0.0555556	0.888898
GO_Biological_Process_2021	dendritic cell migration	1/18	0.129152	0.266014	0	0	7.67415	15.7072	CXCR4	0.0555556	0.888898
GO_Biological_Process_2021	regulation of presynapse assembly	1/18	0.129152	0.266014	0	0	7.67415	15.7072	GPC6	0.0555556	0.888898
GO_Biological_Process_2021	regulation of presynapse organization	1/18	0.129152	0.266014	0	0	7.67415	15.7072	GPC6	0.0555556	0.888898
GO_Biological_Process_2021	fluid transport	1/18	0.129152	0.266014	0	0	7.67415	15.7072	UPK3A	0.0555556	0.888898
GO_Biological_Process_2021	regulation of transcription by RNA polymerase I	1/18	0.129152	0.266014	0	0	7.67415	15.7072	FLNA	0.0555556	0.888898
GO_Biological_Process_2021	regulation of vascular endothelial cell proliferation	1/18	0.129152	0.266014	0	0	7.67415	15.7072	ITGA4	0.0555556	0.888898
GO_Biological_Process_2021	regulation of canonical Wnt signaling pathway	4/253	0.129509	0.266014	0	0	2.11293	4.31885	BAMBI;FRZB;GPC5;APOE	0.0158103	0.887699
GO_Biological_Process_2021	positive regulation of phosphorylation	4/253	0.129509	0.266014	0	0	2.11293	4.31885	MLXIPL;SLCO3A1;ROS1;MT3	0.0158103	0.887699
GO_Biological_Process_2021	regulation of G protein-coupled receptor signaling pathway	2/82	0.130224	0.266703	0	0	3.27268	6.67136	RGS2;RGS6	0.0243902	0.88531
GO_Biological_Process_2021	ephrin receptor signaling pathway	2/82	0.130224	0.266703	0	0	3.27268	6.67136	PAK3;ANKS1B	0.0243902	0.88531
Reactome_2016	Arachidonic acid metabolism	2/53	0.0621825	0.267019	0	0	5.14115	14.2805	FAAH;DPEP2	0.0377358	1.20633
GO_Biological_Process_2021	regulation of defense response	2/83	0.132801	0.268775	0	0	3.23212	6.52533	AHSG;APOE	0.0240964	0.876799
GO_Biological_Process_2021	positive regulation of plasma membrane bounded cell projection assembly	2/83	0.132801	0.268775	0	0	3.23212	6.52533	CCDC88A;DPYSL3	0.0240964	0.876799
GO_Biological_Process_2021	long-chain fatty acid metabolic process	2/83	0.132801	0.268775	0	0	3.23212	6.52533	FAAH;ELOVL6	0.0240964	0.876799
GO_Biological_Process_2021	adenylate cyclase-modulating G protein-coupled receptor signaling pathway	3/165	0.132943	0.268775	0	0	2.43025	4.90383	GNAO1;PTGFR;GCG	0.0181818	0.876334
GO_Biological_Process_2021	lymphocyte differentiation	2/84	0.13539	0.268775	0	0	3.19254	6.38379	ITGA4;TOX	0.0238095	0.868414
GO_Biological_Process_2021	positive regulation of G protein-coupled receptor signaling pathway	1/19	0.13582	0.268775	0	0	7.24744	14.469	CHGA	0.0526316	0.867036
GO_Biological_Process_2021	postsynaptic membrane organization	1/19	0.13582	0.268775	0	0	7.24744	14.469	APOE	0.0526316	0.867036
GO_Biological_Process_2021	synaptic transmission, cholinergic	1/19	0.13582	0.268775	0	0	7.24744	14.469	APOE	0.0526316	0.867036
GO_Biological_Process_2021	leukocyte adhesion to vascular endothelial cell	1/19	0.13582	0.268775	0	0	7.24744	14.469	ITGA4	0.0526316	0.867036
GO_Biological_Process_2021	positive regulation of leukocyte activation	1/19	0.13582	0.268775	0	0	7.24744	14.469	CEBPA	0.0526316	0.867036
GO_Biological_Process_2021	response to ATP	1/19	0.13582	0.268775	0	0	7.24744	14.469	KCNJ11	0.0526316	0.867036
GO_Biological_Process_2021	positive regulation of cilium assembly	1/19	0.13582	0.268775	0	0	7.24744	14.469	CCDC88A	0.0526316	0.867036
GO_Biological_Process_2021	positive regulation of cellular protein catabolic process	1/19	0.13582	0.268775	0	0	7.24744	14.469	APOE	0.0526316	0.867036
GO_Biological_Process_2021	regulation of synaptic vesicle exocytosis	1/19	0.13582	0.268775	0	0	7.24744	14.469	RIMS2	0.0526316	0.867036
GO_Biological_Process_2021	regulation of oligodendrocyte differentiation	1/19	0.13582	0.268775	0	0	7.24744	14.469	CXCR4	0.0526316	0.867036
GO_Biological_Process_2021	regulation of neuroinflammatory response	1/19	0.13582	0.268775	0	0	7.24744	14.469	NUPR1	0.0526316	0.867036
GO_Biological_Process_2021	negative regulation of T cell receptor signaling pathway	1/19	0.13582	0.268775	0	0	7.24744	14.469	PRNP	0.0526316	0.867036
GO_Biological_Process_2021	cellular response to glucagon stimulus	1/19	0.13582	0.268775	0	0	7.24744	14.469	GCG	0.0526316	0.867036
GO_Biological_Process_2021	regulation of collagen biosynthetic process	1/19	0.13582	0.268775	0	0	7.24744	14.469	SERPINF2	0.0526316	0.867036
GO_Biological_Process_2021	negative regulation of nervous system development	1/19	0.13582	0.268775	0	0	7.24744	14.469	PAX6	0.0526316	0.867036
GO_Biological_Process_2021	cardiac atrium morphogenesis	1/19	0.13582	0.268775	0	0	7.24744	14.469	GATA4	0.0526316	0.867036
GO_Biological_Process_2021	regulation of cell-cell adhesion mediated by cadherin	1/19	0.13582	0.268775	0	0	7.24744	14.469	SERPINF2	0.0526316	0.867036
GO_Biological_Process_2021	atrioventricular valve morphogenesis	1/19	0.13582	0.268775	0	0	7.24744	14.469	GATA4	0.0526316	0.867036
GO_Biological_Process_2021	aspartate family amino acid metabolic process	1/19	0.13582	0.268775	0	0	7.24744	14.469	ASNS	0.0526316	0.867036
GO_Biological_Process_2021	negative regulation of defense response	2/85	0.13799	0.272685	0	0	3.15391	6.24656	SELENOS;APOE	0.0235294	0.860152
GO_Biological_Process_2021	negative regulation of cellular amide metabolic process	2/86	0.140601	0.274533	0	0	3.11621	6.11347	PRNP;APOE	0.0232558	0.852011
GO_Biological_Process_2021	negative regulation of phosphorylation	2/86	0.140601	0.274533	0	0	3.11621	6.11347	PRNP;NUPR1	0.0232558	0.852011
GO_Biological_Process_2021	positive regulation of proteasomal protein catabolic process	2/86	0.140601	0.274533	0	0	3.11621	6.11347	CEBPA;NUPR1	0.0232558	0.852011
GO_Biological_Process_2021	cell-cell adhesion via plasma-membrane adhesion molecules	3/170	0.141682	0.274533	0	0	2.35689	4.60576	ALCAM;GPC6;CDH17	0.0176471	0.848685
GO_Biological_Process_2021	energy reserve metabolic process	1/20	0.142437	0.274533	0	0	6.86565	13.3801	MT3	0.05	0.846376
GO_Biological_Process_2021	hepaticobiliary system development	1/20	0.142437	0.274533	0	0	6.86565	13.3801	CEBPA	0.05	0.846376
GO_Biological_Process_2021	granulocyte differentiation	1/20	0.142437	0.274533	0	0	6.86565	13.3801	CEBPA	0.05	0.846376
GO_Biological_Process_2021	positive regulation of G2/M transition of mitotic cell cycle	1/20	0.142437	0.274533	0	0	6.86565	13.3801	CDC25C	0.05	0.846376
GO_Biological_Process_2021	positive regulation of dendrite morphogenesis	1/20	0.142437	0.274533	0	0	6.86565	13.3801	CAMK2B	0.05	0.846376
GO_Biological_Process_2021	ganglioside metabolic process	1/20	0.142437	0.274533	0	0	6.86565	13.3801	ST6GALNAC5	0.05	0.846376
GO_Biological_Process_2021	embryonic digestive tract development	1/20	0.142437	0.274533	0	0	6.86565	13.3801	ID2	0.05	0.846376
GO_Biological_Process_2021	regulation of protein localization to cell periphery	1/20	0.142437	0.274533	0	0	6.86565	13.3801	ZDHHC2	0.05	0.846376
GO_Biological_Process_2021	regulation of programmed necrotic cell death	1/20	0.142437	0.274533	0	0	6.86565	13.3801	NUPR1	0.05	0.846376
GO_Biological_Process_2021	regulation of nuclear division	1/20	0.142437	0.274533	0	0	6.86565	13.3801	CDC25C	0.05	0.846376
GO_Biological_Process_2021	neuromuscular synaptic transmission	1/20	0.142437	0.274533	0	0	6.86565	13.3801	RIMBP2	0.05	0.846376
GO_Biological_Process_2021	protein-DNA complex disassembly	1/20	0.142437	0.274533	0	0	6.86565	13.3801	H2AW	0.05	0.846376
GO_Biological_Process_2021	cardiac ventricle development	1/20	0.142437	0.274533	0	0	6.86565	13.3801	GATA4	0.05	0.846376
GO_Biological_Process_2021	negative regulation of cyclin-dependent protein serine/threonine kinase activity	1/20	0.142437	0.274533	0	0	6.86565	13.3801	CEBPA	0.05	0.846376
GO_Biological_Process_2021	ERAD pathway	2/87	0.143223	0.275293	0	0	3.07939	5.98434	SELENOS;SGTB	0.0229885	0.843987
GO_Biological_Process_2021	protein targeting to membrane	2/87	0.143223	0.275293	0	0	3.07939	5.98434	SGTB;ZDHHC2	0.0229885	0.843987
GO_Biological_Process_2021	regulation of protein phosphorylation	4/266	0.147343	0.277314	0	0	2.00676	3.84293	PRNP;CCDC88A;SLCO3A1;MT3	0.0150376	0.83167
GO_Biological_Process_2021	regulation of cysteine-type endopeptidase activity involved in apoptotic process	2/89	0.148498	0.277314	0	0	3.0083	5.73738	FABP1;MT3	0.0224719	0.828281
GO_Biological_Process_2021	collagen fibril organization	2/89	0.148498	0.277314	0	0	3.0083	5.73738	SERPINF2;COL6A3	0.0224719	0.828281
GO_Biological_Process_2021	positive regulation of inflammatory response	2/89	0.148498	0.277314	0	0	3.0083	5.73738	CEBPA;NUPR1	0.0224719	0.828281
GO_Biological_Process_2021	second-messenger-mediated signaling	2/89	0.148498	0.277314	0	0	3.0083	5.73738	CXCR4;APOE	0.0224719	0.828281
GO_Biological_Process_2021	zinc ion transport	1/21	0.149004	0.277314	0	0	6.52204	12.4165	MT3	0.047619	0.826801
GO_Biological_Process_2021	negative regulation of peptidyl-serine phosphorylation	1/21	0.149004	0.277314	0	0	6.52204	12.4165	MLXIPL	0.047619	0.826801
GO_Biological_Process_2021	acetylcholine receptor signaling pathway	1/21	0.149004	0.277314	0	0	6.52204	12.4165	LY6H	0.047619	0.826801
GO_Biological_Process_2021	positive regulation of transcription regulatory region DNA binding	1/21	0.149004	0.277314	0	0	6.52204	12.4165	PAX6	0.047619	0.826801
GO_Biological_Process_2021	regulation of cholesterol metabolic process	1/21	0.149004	0.277314	0	0	6.52204	12.4165	APOE	0.047619	0.826801
GO_Biological_Process_2021	negative regulation of reproductive process	1/21	0.149004	0.277314	0	0	6.52204	12.4165	DUSP1	0.047619	0.826801
GO_Biological_Process_2021	regulation of transcription by RNA polymerase III	1/21	0.149004	0.277314	0	0	6.52204	12.4165	CEBPA	0.047619	0.826801
GO_Biological_Process_2021	positive regulation of transcription from RNA polymerase II promoter involved in cellular response to chemical stimulus	1/21	0.149004	0.277314	0	0	6.52204	12.4165	MT3	0.047619	0.826801
GO_Biological_Process_2021	positive regulation of purine nucleotide metabolic process	1/21	0.149004	0.277314	0	0	6.52204	12.4165	MLXIPL	0.047619	0.826801
GO_Biological_Process_2021	positive regulation of phosphatase activity	1/21	0.149004	0.277314	0	0	6.52204	12.4165	ITGA1	0.047619	0.826801
GO_Biological_Process_2021	sensory perception of pain	1/21	0.149004	0.277314	0	0	6.52204	12.4165	SCN9A	0.047619	0.826801
GO_Biological_Process_2021	response to glucagon	1/21	0.149004	0.277314	0	0	6.52204	12.4165	GCG	0.047619	0.826801
GO_Biological_Process_2021	positive regulation of glycolytic process	1/21	0.149004	0.277314	0	0	6.52204	12.4165	MLXIPL	0.047619	0.826801
GO_Biological_Process_2021	cellular response to estradiol stimulus	1/21	0.149004	0.277314	0	0	6.52204	12.4165	SSTR1	0.047619	0.826801
GO_Biological_Process_2021	epithelial cell development	1/21	0.149004	0.277314	0	0	6.52204	12.4165	ROS1	0.047619	0.826801
GO_Biological_Process_2021	endocardial cushion development	1/21	0.149004	0.277314	0	0	6.52204	12.4165	GATA4	0.047619	0.826801
GO_Biological_Process_2021	chondroitin sulfate biosynthetic process	1/21	0.149004	0.277314	0	0	6.52204	12.4165	VCAN	0.047619	0.826801
GO_Biological_Process_2021	neuron apoptotic process	1/21	0.149004	0.277314	0	0	6.52204	12.4165	TRPC5	0.047619	0.826801
GO_Biological_Process_2021	cellular response to inorganic substance	1/21	0.149004	0.277314	0	0	6.52204	12.4165	MT3	0.047619	0.826801
GO_Biological_Process_2021	regulation of cellular macromolecule biosynthetic process	6/468	0.150093	0.278971	0	0	1.71261	3.24796	CCDC88A;MLXIPL;CEBPA;TCF7;GATA4;ELAVL2	0.0128205	0.823639
Reactome_2016	CHL1 interactions	1/9	0.0667931	0.280224	0	0	16.315	44.1508	ITGA1	0.111111	1.17527
Reactome_2016	Prostanoid ligand receptors	1/9	0.0667931	0.280224	0	0	16.315	44.1508	PTGFR	0.111111	1.17527
GO_Biological_Process_2021	positive regulation of binding	2/90	0.15115	0.280564	0	0	2.97396	5.61926	BAMBI;APOE	0.0222222	0.820593
GO_Biological_Process_2021	positive regulation of transport	2/91	0.153811	0.281258	0	0	2.9404	5.50451	AHSG;APOE	0.021978	0.813012
GO_Biological_Process_2021	regulation of actin cytoskeleton organization	2/91	0.153811	0.281258	0	0	2.9404	5.50451	CCDC88A;PAK3	0.021978	0.813012
GO_Biological_Process_2021	peptidyl-threonine dephosphorylation	1/22	0.155521	0.281258	0	0	6.21115	11.5588	DUSP1	0.0454545	0.80821
GO_Biological_Process_2021	lipid droplet organization	1/22	0.155521	0.281258	0	0	6.21115	11.5588	CIDEC	0.0454545	0.80821
GO_Biological_Process_2021	regulation of endoplasmic reticulum stress-induced intrinsic apoptotic signaling pathway	1/22	0.155521	0.281258	0	0	6.21115	11.5588	SELENOS	0.0454545	0.80821
GO_Biological_Process_2021	regulation of platelet activation	1/22	0.155521	0.281258	0	0	6.21115	11.5588	APOE	0.0454545	0.80821
GO_Biological_Process_2021	negative regulation of myeloid cell differentiation	1/22	0.155521	0.281258	0	0	6.21115	11.5588	ZBTB16	0.0454545	0.80821
GO_Biological_Process_2021	neuronal action potential	1/22	0.155521	0.281258	0	0	6.21115	11.5588	SCN9A	0.0454545	0.80821
GO_Biological_Process_2021	negative regulation of interleukin-2 production	1/22	0.155521	0.281258	0	0	6.21115	11.5588	PRNP	0.0454545	0.80821
GO_Biological_Process_2021	regulation of cardiac muscle cell membrane repolarization	1/22	0.155521	0.281258	0	0	6.21115	11.5588	FLNA	0.0454545	0.80821
GO_Biological_Process_2021	negative regulation of cyclin-dependent protein kinase activity	1/22	0.155521	0.281258	0	0	6.21115	11.5588	CEBPA	0.0454545	0.80821
GO_Biological_Process_2021	amino acid import	1/22	0.155521	0.281258	0	0	6.21115	11.5588	SLC7A8	0.0454545	0.80821
GO_Biological_Process_2021	negative regulation of biomineral tissue development	1/22	0.155521	0.281258	0	0	6.21115	11.5588	AHSG	0.0454545	0.80821
GO_Biological_Process_2021	limb morphogenesis	1/22	0.155521	0.281258	0	0	6.21115	11.5588	FBXW4	0.0454545	0.80821
GO_Biological_Process_2021	membrane lipid metabolic process	1/22	0.155521	0.281258	0	0	6.21115	11.5588	CERKL	0.0454545	0.80821
GO_Biological_Process_2021	regulation of membrane protein ectodomain proteolysis	1/22	0.155521	0.281258	0	0	6.21115	11.5588	APOE	0.0454545	0.80821
GO_Biological_Process_2021	regulation of response to cytokine stimulus	1/22	0.155521	0.281258	0	0	6.21115	11.5588	LIFR	0.0454545	0.80821
GO_Biological_Process_2021	negative regulation of B cell activation	1/22	0.155521	0.281258	0	0	6.21115	11.5588	ID2	0.0454545	0.80821
GO_Biological_Process_2021	positive regulation of neural precursor cell proliferation	1/22	0.155521	0.281258	0	0	6.21115	11.5588	TOX	0.0454545	0.80821
GO_Biological_Process_2021	glutamate metabolic process	1/22	0.155521	0.281258	0	0	6.21115	11.5588	GLUD1	0.0454545	0.80821
GO_Biological_Process_2021	Wnt signaling pathway	2/92	0.156482	0.282269	0	0	2.90758	5.39302	FRZB;TCF7	0.0217391	0.805536
GO_Biological_Process_2021	regulation of endothelial cell proliferation	2/92	0.156482	0.282269	0	0	2.90758	5.39302	EGR3;APOE	0.0217391	0.805536
GO_Biological_Process_2021	protein stabilization	3/179	0.157876	0.284419	0	0	2.23534	4.12632	FLNA;MT3;A1CF	0.0167598	0.801684
GO_Biological_Process_2021	regulation of epithelial cell proliferation	2/93	0.159161	0.285254	0	0	2.87548	5.28467	TGFA;NUPR1	0.0215054	0.798162
GO_Biological_Process_2021	negative regulation of cellular protein metabolic process	2/94	0.161849	0.285254	0	0	2.84408	5.17933	SERPINE2;APOE	0.0212766	0.790889
GO_Biological_Process_2021	nucleosome organization	2/94	0.161849	0.285254	0	0	2.84408	5.17933	H2AW;H1-3	0.0212766	0.790889
GO_Biological_Process_2021	positive regulation of cholesterol efflux	1/23	0.161989	0.285254	0	0	5.92853	10.7913	APOE	0.0434783	0.790516
GO_Biological_Process_2021	vesicle transport along microtubule	1/23	0.161989	0.285254	0	0	5.92853	10.7913	KIF1A	0.0434783	0.790516
GO_Biological_Process_2021	positive regulation of epithelial cell apoptotic process	1/23	0.161989	0.285254	0	0	5.92853	10.7913	ITGA4	0.0434783	0.790516
GO_Biological_Process_2021	regulation of steroid metabolic process	1/23	0.161989	0.285254	0	0	5.92853	10.7913	APOE	0.0434783	0.790516
GO_Biological_Process_2021	negative regulation of intracellular protein transport	1/23	0.161989	0.285254	0	0	5.92853	10.7913	INSIG1	0.0434783	0.790516
GO_Biological_Process_2021	positive regulation of cell cycle G2/M phase transition	1/23	0.161989	0.285254	0	0	5.92853	10.7913	CDC25C	0.0434783	0.790516
GO_Biological_Process_2021	peptidyl-S-diacylglycerol-L-cysteine biosynthetic process from peptidyl-cysteine	1/23	0.161989	0.285254	0	0	5.92853	10.7913	ZDHHC2	0.0434783	0.790516
GO_Biological_Process_2021	peptidyl-L-cysteine S-palmitoylation	1/23	0.161989	0.285254	0	0	5.92853	10.7913	ZDHHC2	0.0434783	0.790516
GO_Biological_Process_2021	oligosaccharide biosynthetic process	1/23	0.161989	0.285254	0	0	5.92853	10.7913	ST6GALNAC5	0.0434783	0.790516
GO_Biological_Process_2021	negative regulation of reactive oxygen species metabolic process	1/23	0.161989	0.285254	0	0	5.92853	10.7913	MT3	0.0434783	0.790516
GO_Biological_Process_2021	regulation of cysteine-type endopeptidase activity	1/23	0.161989	0.285254	0	0	5.92853	10.7913	MT3	0.0434783	0.790516
GO_Biological_Process_2021	ERK1 and ERK2 cascade	1/23	0.161989	0.285254	0	0	5.92853	10.7913	MT3	0.0434783	0.790516
GO_Biological_Process_2021	blood vessel endothelial cell migration	1/23	0.161989	0.285254	0	0	5.92853	10.7913	EGR3	0.0434783	0.790516
GO_Biological_Process_2021	regulation of calcium ion transmembrane transport	1/23	0.161989	0.285254	0	0	5.92853	10.7913	PRNP	0.0434783	0.790516
GO_Biological_Process_2021	negative regulation of G protein-coupled receptor signaling pathway	1/23	0.161989	0.285254	0	0	5.92853	10.7913	RGS2	0.0434783	0.790516
GO_Biological_Process_2021	ciliary basal body-plasma membrane docking	2/95	0.164546	0.289395	0	0	2.81336	5.07689	SCLT1;TUBA4A	0.0210526	0.783713
GO_Biological_Process_2021	negative regulation of cell population proliferation	5/379	0.165697	0.290022	0	0	1.75902	3.16199	CEBPA;FRZB;ITGA1;NUPR1;SSTR1	0.0131926	0.780685
GO_Biological_Process_2021	cellular transition metal ion homeostasis	2/96	0.16725	0.290022	0	0	2.78329	4.97725	PRNP;MT3	0.0208333	0.776633
GO_Biological_Process_2021	protein exit from endoplasmic reticulum	1/24	0.168407	0.290022	0	0	5.67048	10.1012	SELENOS	0.0416667	0.77364
GO_Biological_Process_2021	protein kinase B signaling	1/24	0.168407	0.290022	0	0	5.67048	10.1012	MT3	0.0416667	0.77364
GO_Biological_Process_2021	cholesterol efflux	1/24	0.168407	0.290022	0	0	5.67048	10.1012	APOE	0.0416667	0.77364
GO_Biological_Process_2021	wound healing, spreading of cells	1/24	0.168407	0.290022	0	0	5.67048	10.1012	FLNA	0.0416667	0.77364
GO_Biological_Process_2021	glucose catabolic process to pyruvate	1/24	0.168407	0.290022	0	0	5.67048	10.1012	PKLR	0.0416667	0.77364
GO_Biological_Process_2021	regulation of cardiac muscle hypertrophy	1/24	0.168407	0.290022	0	0	5.67048	10.1012	RGS2	0.0416667	0.77364
GO_Biological_Process_2021	canonical glycolysis	1/24	0.168407	0.290022	0	0	5.67048	10.1012	PKLR	0.0416667	0.77364
GO_Biological_Process_2021	carbohydrate biosynthetic process	1/24	0.168407	0.290022	0	0	5.67048	10.1012	ST6GALNAC5	0.0416667	0.77364
GO_Biological_Process_2021	negative regulation of ossification	1/24	0.168407	0.290022	0	0	5.67048	10.1012	AHSG	0.0416667	0.77364
GO_Biological_Process_2021	DNA packaging	1/24	0.168407	0.290022	0	0	5.67048	10.1012	H1-3	0.0416667	0.77364
GO_Biological_Process_2021	positive regulation of transcription from RNA polymerase II promoter in response to stress	1/24	0.168407	0.290022	0	0	5.67048	10.1012	MT3	0.0416667	0.77364
GO_Biological_Process_2021	positive regulation of carbohydrate metabolic process	1/24	0.168407	0.290022	0	0	5.67048	10.1012	MLXIPL	0.0416667	0.77364
GO_Biological_Process_2021	leukotriene metabolic process	1/24	0.168407	0.290022	0	0	5.67048	10.1012	DPEP2	0.0416667	0.77364
GO_Biological_Process_2021	long-chain fatty-acyl-CoA metabolic process	1/24	0.168407	0.290022	0	0	5.67048	10.1012	ELOVL6	0.0416667	0.77364
GO_Biological_Process_2021	positive regulation of protein targeting to membrane	1/24	0.168407	0.290022	0	0	5.67048	10.1012	PRNP	0.0416667	0.77364
Reactome_2016	Ionotropic activity of Kainate Receptors	1/10	0.0739353	0.290176	0	0	14.5015	37.77	GRIK1	0.1	1.13115
Reactome_2016	Activation of Ca-permeable Kainate Receptor	1/10	0.0739353	0.290176	0	0	14.5015	37.77	GRIK1	0.1	1.13115
Reactome_2016	Signal attenuation	1/10	0.0739353	0.290176	0	0	14.5015	37.77	GRB10	0.1	1.13115
Reactome_2016	GP1b-IX-V activation signalling	1/10	0.0739353	0.290176	0	0	14.5015	37.77	FLNA	0.1	1.13115
Reactome_2016	Creatine metabolism	1/10	0.0739353	0.290176	0	0	14.5015	37.77	GATM	0.1	1.13115
Reactome_2016	Role of second messengers in netrin-1 signaling	1/10	0.0739353	0.290176	0	0	14.5015	37.77	TRPC5	0.1	1.13115
GO_Biological_Process_2021	endoplasmic reticulum to Golgi vesicle-mediated transport	3/185	0.168976	0.290647	0	0	2.16099	3.84223	PGAP1;CTSZ;TGFA	0.0162162	0.772175
GO_Biological_Process_2021	cardiac conduction system development	1/25	0.174776	0.294503	0	0	5.43394	9.47814	GATA4	0.04	0.757518
GO_Biological_Process_2021	peripheral nervous system development	1/25	0.174776	0.294503	0	0	5.43394	9.47814	NFASC	0.04	0.757518
GO_Biological_Process_2021	regulation of calcium ion import	1/25	0.174776	0.294503	0	0	5.43394	9.47814	PRNP	0.04	0.757518
GO_Biological_Process_2021	negative regulation of response to endoplasmic reticulum stress	1/25	0.174776	0.294503	0	0	5.43394	9.47814	SELENOS	0.04	0.757518
GO_Biological_Process_2021	regulation of microtubule depolymerization	1/25	0.174776	0.294503	0	0	5.43394	9.47814	MAP1B	0.04	0.757518
GO_Biological_Process_2021	divalent inorganic cation homeostasis	1/25	0.174776	0.294503	0	0	5.43394	9.47814	MT3	0.04	0.757518
GO_Biological_Process_2021	peptide catabolic process	1/25	0.174776	0.294503	0	0	5.43394	9.47814	CHAC2	0.04	0.757518
GO_Biological_Process_2021	negative regulation of antigen receptor-mediated signaling pathway	1/25	0.174776	0.294503	0	0	5.43394	9.47814	PRNP	0.04	0.757518
GO_Biological_Process_2021	energy derivation by oxidation of organic compounds	1/25	0.174776	0.294503	0	0	5.43394	9.47814	MT3	0.04	0.757518
GO_Biological_Process_2021	regulation of proteolysis involved in cellular protein catabolic process	1/25	0.174776	0.294503	0	0	5.43394	9.47814	APOE	0.04	0.757518
GO_Biological_Process_2021	positive regulation of ERBB signaling pathway	1/25	0.174776	0.294503	0	0	5.43394	9.47814	CCDC88A	0.04	0.757518
GO_Biological_Process_2021	glycolytic process through glucose-6-phosphate	1/25	0.174776	0.294503	0	0	5.43394	9.47814	PKLR	0.04	0.757518
GO_Biological_Process_2021	response to dsRNA	1/25	0.174776	0.294503	0	0	5.43394	9.47814	SLC3A2	0.04	0.757518
GO_Biological_Process_2021	response to hexose	1/25	0.174776	0.294503	0	0	5.43394	9.47814	SELENOS	0.04	0.757518
GO_Biological_Process_2021	positive regulation of vascular endothelial growth factor production	1/25	0.174776	0.294503	0	0	5.43394	9.47814	GATA4	0.04	0.757518
GO_Biological_Process_2021	ventricular cardiac muscle tissue development	1/25	0.174776	0.294503	0	0	5.43394	9.47814	ID2	0.04	0.757518
GO_Biological_Process_2021	negative regulation of cellular carbohydrate metabolic process	1/25	0.174776	0.294503	0	0	5.43394	9.47814	NUPR1	0.04	0.757518
GO_Biological_Process_2021	organic anion transport	2/99	0.175409	0.294863	0	0	2.6968	4.69414	SLCO3A1;HBB	0.020202	0.755948
GO_Biological_Process_2021	positive regulation of stress-activated MAPK cascade	2/99	0.175409	0.294863	0	0	2.6968	4.69414	SERPINF2;TPD52L1	0.020202	0.755948
GO_Biological_Process_2021	regulation of GTPase activity	3/189	0.1765	0.296342	0	0	2.11409	3.66675	RGS6;PLXNA4;PRKG1	0.015873	0.753256
GO_Biological_Process_2021	organic acid transport	2/100	0.178143	0.298016	0	0	2.66914	4.60473	SLC7A8;SLC3A2	0.02	0.749232
GO_Biological_Process_2021	cell-matrix adhesion	2/100	0.178143	0.298016	0	0	2.66914	4.60473	ITGA4;ITGA1	0.02	0.749232
GO_Biological_Process_2021	negative regulation of Wnt signaling pathway	3/191	0.180296	0.298016	0	0	2.09138	3.58286	FRZB;GRB10;APOE	0.0157068	0.744014
GO_Biological_Process_2021	negative regulation of cell differentiation	3/191	0.180296	0.298016	0	0	2.09138	3.58286	BAMBI;ZBTB16;ID2	0.0157068	0.744014
GO_Biological_Process_2021	positive regulation of filopodium assembly	1/26	0.181097	0.298016	0	0	5.21632	8.91324	DPYSL3	0.0384615	0.742089
GO_Biological_Process_2021	negative regulation of protein transport	1/26	0.181097	0.298016	0	0	5.21632	8.91324	APOE	0.0384615	0.742089
GO_Biological_Process_2021	lamellipodium assembly	1/26	0.181097	0.298016	0	0	5.21632	8.91324	CCDC88A	0.0384615	0.742089
GO_Biological_Process_2021	glial cell development	1/26	0.181097	0.298016	0	0	5.21632	8.91324	MT3	0.0384615	0.742089
GO_Biological_Process_2021	regulation of synapse organization	1/26	0.181097	0.298016	0	0	5.21632	8.91324	CAMK2B	0.0384615	0.742089
GO_Biological_Process_2021	membrane depolarization during action potential	1/26	0.181097	0.298016	0	0	5.21632	8.91324	SCN9A	0.0384615	0.742089
GO_Biological_Process_2021	TOR signaling	1/26	0.181097	0.298016	0	0	5.21632	8.91324	CCDC88A	0.0384615	0.742089
GO_Biological_Process_2021	regulation of monocyte chemotaxis	1/26	0.181097	0.298016	0	0	5.21632	8.91324	DUSP1	0.0384615	0.742089
GO_Biological_Process_2021	regulation of glycogen biosynthetic process	1/26	0.181097	0.298016	0	0	5.21632	8.91324	SELENOS	0.0384615	0.742089
GO_Biological_Process_2021	regulation of mitotic metaphase/anaphase transition	1/26	0.181097	0.298016	0	0	5.21632	8.91324	DUSP1	0.0384615	0.742089
GO_Biological_Process_2021	negative regulation of cell development	1/26	0.181097	0.298016	0	0	5.21632	8.91324	PAX6	0.0384615	0.742089
GO_Biological_Process_2021	negative regulation of macroautophagy	1/26	0.181097	0.298016	0	0	5.21632	8.91324	NUPR1	0.0384615	0.742089
GO_Biological_Process_2021	regulation of biomineral tissue development	1/26	0.181097	0.298016	0	0	5.21632	8.91324	AHSG	0.0384615	0.742089
KEGG_2021_Human	Glutamatergic synapse	4/114	0.011475	0.300361	0	0	4.81684	21.5196	GNAO1;GRM4;GRM7;GRIK1	0.0350877	1.94025
KEGG_2021_Human	Axon guidance	5/182	0.0131116	0.300361	0	0	3.75439	16.2725	CAMK2B;TRPC5;CXCR4;PAK3;PLXNA4	0.0274725	1.88235
KEGG_2021_Human	Acute myeloid leukemia	3/67	0.0147156	0.300361	0	0	6.18219	26.0817	CEBPA;ZBTB16;TCF7	0.0447761	1.83222
KEGG_2021_Human	Transcriptional misregulation in cancer	5/192	0.0161799	0.300361	0	0	3.55181	14.6476	CEBPA;ZEB1;ZBTB16;ID2;NUPR1	0.0260417	1.79102
KEGG_2021_Human	Maturity onset diabetes of the young	2/26	0.0167548	0.300361	0	0	10.9398	44.7338	PKLR;PAX6	0.0769231	1.77586
KEGG_2021_Human	PPAR signaling pathway	3/74	0.0191599	0.300361	0	0	5.5707	22.0318	FABP1;HMGCS1;FABP5	0.0405405	1.71761
KEGG_2021_Human	Focal adhesion	5/201	0.0193215	0.300361	0	0	3.38717	13.3676	ITGA4;ITGA1;FLNA;COL6A3;PAK3	0.0248756	1.71396
GO_Biological_Process_2021	regulation of protein catabolic process	2/102	0.18363	0.301479	0	0	2.6155	4.43283	FLNA;ZDHHC2	0.0196078	0.736057
GO_Biological_Process_2021	cell junction assembly	2/102	0.18363	0.301479	0	0	2.6155	4.43283	SLITRK6;FLNA	0.0196078	0.736057
GO_Biological_Process_2021	entrainment of circadian clock by photoperiod	1/27	0.18737	0.302674	0	0	5.01544	8.39921	ID2	0.037037	0.727301
GO_Biological_Process_2021	regulation of vascular endothelial growth factor production	1/27	0.18737	0.302674	0	0	5.01544	8.39921	GATA4	0.037037	0.727301
GO_Biological_Process_2021	positive regulation of nitric oxide biosynthetic process	1/27	0.18737	0.302674	0	0	5.01544	8.39921	HBB	0.037037	0.727301
GO_Biological_Process_2021	cellular response to cadmium ion	1/27	0.18737	0.302674	0	0	5.01544	8.39921	MT3	0.037037	0.727301
GO_Biological_Process_2021	positive regulation of nuclear division	1/27	0.18737	0.302674	0	0	5.01544	8.39921	TGFA	0.037037	0.727301
GO_Biological_Process_2021	modulation of excitatory postsynaptic potential	1/27	0.18737	0.302674	0	0	5.01544	8.39921	RIMS2	0.037037	0.727301
GO_Biological_Process_2021	monocarboxylic acid catabolic process	1/27	0.18737	0.302674	0	0	5.01544	8.39921	FAAH	0.037037	0.727301
GO_Biological_Process_2021	cellular senescence	1/27	0.18737	0.302674	0	0	5.01544	8.39921	ID2	0.037037	0.727301
GO_Biological_Process_2021	positive regulation of mitotic cell cycle	1/27	0.18737	0.302674	0	0	5.01544	8.39921	ASNS	0.037037	0.727301
GO_Biological_Process_2021	regulation of epidermal growth factor-activated receptor activity	1/27	0.18737	0.302674	0	0	5.01544	8.39921	TGFA	0.037037	0.727301
GO_Biological_Process_2021	calcium-ion regulated exocytosis	1/27	0.18737	0.302674	0	0	5.01544	8.39921	RIMS2	0.037037	0.727301
GO_Biological_Process_2021	negative regulation of catalytic activity	1/27	0.18737	0.302674	0	0	5.01544	8.39921	MT3	0.037037	0.727301
GO_Biological_Process_2021	acute inflammatory response	1/27	0.18737	0.302674	0	0	5.01544	8.39921	AHSG	0.037037	0.727301
GO_Biological_Process_2021	negative regulation of protein polymerization	1/27	0.18737	0.302674	0	0	5.01544	8.39921	MAP2	0.037037	0.727301
KEGG_2021_Human	Arrhythmogenic right ventricular cardiomyopathy	3/77	0.0212672	0.303057	0	0	5.34405	20.5778	ITGA4;ITGA1;TCF7	0.038961	1.67229
Reactome_2016	Response to metal ions	1/11	0.0810232	0.304881	0	0	13.0507	32.7966	MT3	0.0909091	1.09139
Reactome_2016	Transport of organic anions	1/11	0.0810232	0.304881	0	0	13.0507	32.7966	SLCO3A1	0.0909091	1.09139
Reactome_2016	Dermatan sulfate biosynthesis	1/11	0.0810232	0.304881	0	0	13.0507	32.7966	VCAN	0.0909091	1.09139
Reactome_2016	Metallothioneins bind metals	1/11	0.0810232	0.304881	0	0	13.0507	32.7966	MT3	0.0909091	1.09139
GO_Biological_Process_2021	positive regulation of cellular metabolic process	2/105	0.191906	0.305367	0	0	2.53893	4.19114	APOE;MT3	0.0190476	0.716911
GO_Biological_Process_2021	regulation of JNK cascade	2/105	0.191906	0.305367	0	0	2.53893	4.19114	SERPINF2;TPD52L1	0.0190476	0.716911
GO_Biological_Process_2021	phosphorylation	5/400	0.19264	0.305367	0	0	1.6637	2.74	CAMK2B;CERKL;PAK3;ROS1;PRKG1	0.0125	0.715254
GO_Biological_Process_2021	regulation of plasma membrane bounded cell projection organization	1/28	0.193595	0.305367	0	0	4.82943	7.92988	CCDC88A	0.0357143	0.713106
GO_Biological_Process_2021	positive regulation of monooxygenase activity	1/28	0.193595	0.305367	0	0	4.82943	7.92988	APOE	0.0357143	0.713106
GO_Biological_Process_2021	positive regulation of nitric oxide metabolic process	1/28	0.193595	0.305367	0	0	4.82943	7.92988	HBB	0.0357143	0.713106
GO_Biological_Process_2021	GPI anchor metabolic process	1/28	0.193595	0.305367	0	0	4.82943	7.92988	PGAP1	0.0357143	0.713106
GO_Biological_Process_2021	positive regulation of cell communication	1/28	0.193595	0.305367	0	0	4.82943	7.92988	RIMS2	0.0357143	0.713106
GO_Biological_Process_2021	regulation of small molecule metabolic process	1/28	0.193595	0.305367	0	0	4.82943	7.92988	APOE	0.0357143	0.713106
GO_Biological_Process_2021	photoperiodism	1/28	0.193595	0.305367	0	0	4.82943	7.92988	ID2	0.0357143	0.713106
GO_Biological_Process_2021	regulation of postsynapse organization	1/28	0.193595	0.305367	0	0	4.82943	7.92988	KIF1A	0.0357143	0.713106
GO_Biological_Process_2021	regulation of calcineurin-NFAT signaling cascade	1/28	0.193595	0.305367	0	0	4.82943	7.92988	PRNP	0.0357143	0.713106
GO_Biological_Process_2021	regulation of neuron migration	1/28	0.193595	0.305367	0	0	4.82943	7.92988	CAMK2B	0.0357143	0.713106
GO_Biological_Process_2021	regulation of insulin secretion involved in cellular response to glucose stimulus	1/28	0.193595	0.305367	0	0	4.82943	7.92988	GCG	0.0357143	0.713106
GO_Biological_Process_2021	cellular zinc ion homeostasis	1/28	0.193595	0.305367	0	0	4.82943	7.92988	MT3	0.0357143	0.713106
GO_Biological_Process_2021	cellular response to interleukin-6	1/28	0.193595	0.305367	0	0	4.82943	7.92988	CEBPA	0.0357143	0.713106
GO_Biological_Process_2021	negative regulation of oxidative stress-induced cell death	1/28	0.193595	0.305367	0	0	4.82943	7.92988	GATA4	0.0357143	0.713106
GO_Biological_Process_2021	amide transport	1/28	0.193595	0.305367	0	0	4.82943	7.92988	UPK3A	0.0357143	0.713106
GO_Biological_Process_2021	positive regulation of protein import into nucleus	1/28	0.193595	0.305367	0	0	4.82943	7.92988	FLNA	0.0357143	0.713106
GO_Biological_Process_2021	leukocyte cell-cell adhesion	1/28	0.193595	0.305367	0	0	4.82943	7.92988	ITGA4	0.0357143	0.713106
GO_Biological_Process_2021	protein localization to cell surface	1/28	0.193595	0.305367	0	0	4.82943	7.92988	FLNA	0.0357143	0.713106
GO_Biological_Process_2021	small GTPase mediated signal transduction	2/106	0.194676	0.306729	0	0	2.51439	4.1146	CCDC88A;RUNDC3A	0.0188679	0.710687
GO_Biological_Process_2021	cytokine-mediated signaling pathway	7/621	0.198903	0.3099	0	0	1.50184	2.42538	CAMK2B;CEBPA;ZEB1;GRB10;LIFR;JUNB;MT3	0.0112721	0.701358
GO_Biological_Process_2021	lipid catabolic process	1/29	0.199772	0.3099	0	0	4.65672	7.5	MT3	0.0344828	0.699465
GO_Biological_Process_2021	transition metal ion homeostasis	1/29	0.199772	0.3099	0	0	4.65672	7.5	MT3	0.0344828	0.699465
GO_Biological_Process_2021	lamellipodium organization	1/29	0.199772	0.3099	0	0	4.65672	7.5	CCDC88A	0.0344828	0.699465
GO_Biological_Process_2021	regulation of actin polymerization or depolymerization	1/29	0.199772	0.3099	0	0	4.65672	7.5	PAK3	0.0344828	0.699465
GO_Biological_Process_2021	negative regulation of mRNA catabolic process	1/29	0.199772	0.3099	0	0	4.65672	7.5	TENT5A	0.0344828	0.699465
GO_Biological_Process_2021	regulation of gluconeogenesis	1/29	0.199772	0.3099	0	0	4.65672	7.5	SELENOS	0.0344828	0.699465
GO_Biological_Process_2021	regulation of protein targeting to membrane	1/29	0.199772	0.3099	0	0	4.65672	7.5	PRNP	0.0344828	0.699465
GO_Biological_Process_2021	glycolytic process	1/29	0.199772	0.3099	0	0	4.65672	7.5	PKLR	0.0344828	0.699465
GO_Biological_Process_2021	response to cadmium ion	1/29	0.199772	0.3099	0	0	4.65672	7.5	MT3	0.0344828	0.699465
GO_Biological_Process_2021	response to zinc ion	1/29	0.199772	0.3099	0	0	4.65672	7.5	MT3	0.0344828	0.699465
GO_Biological_Process_2021	regulation of fatty acid biosynthetic process	1/29	0.199772	0.3099	0	0	4.65672	7.5	MLXIPL	0.0344828	0.699465
GO_Biological_Process_2021	beta-catenin-TCF complex assembly	1/29	0.199772	0.3099	0	0	4.65672	7.5	TCF7	0.0344828	0.699465
GO_Biological_Process_2021	negative regulation of interferon-gamma production	1/29	0.199772	0.3099	0	0	4.65672	7.5	PRNP	0.0344828	0.699465
GO_Biological_Process_2021	regulation of cell migration	5/408	0.203295	0.315017	0	0	1.63	2.59676	CAMK2B;SERPINE2;DPYSL3;FLNA;PLXNA4	0.0122549	0.691874
Reactome_2016	O2/CO2 exchange in erythrocytes	1/12	0.0880572	0.315107	0	0	11.8636	28.8259	HBB	0.0833333	1.05523
Reactome_2016	Chk1/Chk2(Cds1) mediated inactivation of Cyclin B:Cdk1 complex	1/12	0.0880572	0.315107	0	0	11.8636	28.8259	CDC25C	0.0833333	1.05523
Reactome_2016	CD28 dependent Vav1 pathway	1/12	0.0880572	0.315107	0	0	11.8636	28.8259	PAK3	0.0833333	1.05523
Reactome_2016	Physiological factors	1/12	0.0880572	0.315107	0	0	11.8636	28.8259	GATA4	0.0833333	1.05523
Reactome_2016	Erythrocytes take up carbon dioxide and release oxygen	1/12	0.0880572	0.315107	0	0	11.8636	28.8259	HBB	0.0833333	1.05523
GO_Biological_Process_2021	heterotypic cell-cell adhesion	1/30	0.205903	0.315583	0	0	4.49592	7.10512	ITGA4	0.0333333	0.686337
GO_Biological_Process_2021	long-chain fatty acid biosynthetic process	1/30	0.205903	0.315583	0	0	4.49592	7.10512	ELOVL6	0.0333333	0.686337
GO_Biological_Process_2021	regulation of catecholamine secretion	1/30	0.205903	0.315583	0	0	4.49592	7.10512	CHGA	0.0333333	0.686337
GO_Biological_Process_2021	chondroitin sulfate metabolic process	1/30	0.205903	0.315583	0	0	4.49592	7.10512	VCAN	0.0333333	0.686337
GO_Biological_Process_2021	regulation of macrophage activation	1/30	0.205903	0.315583	0	0	4.49592	7.10512	CEBPA	0.0333333	0.686337
GO_Biological_Process_2021	fatty-acyl-CoA biosynthetic process	1/30	0.205903	0.315583	0	0	4.49592	7.10512	ELOVL6	0.0333333	0.686337
GO_Biological_Process_2021	respiratory tube development	1/30	0.205903	0.315583	0	0	4.49592	7.10512	CEBPA	0.0333333	0.686337
GO_Biological_Process_2021	zinc ion homeostasis	1/30	0.205903	0.315583	0	0	4.49592	7.10512	MT3	0.0333333	0.686337
GO_Biological_Process_2021	synaptic vesicle cycle	1/30	0.205903	0.315583	0	0	4.49592	7.10512	CPLX2	0.0333333	0.686337
GO_Biological_Process_2021	positive regulation of protein import	1/30	0.205903	0.315583	0	0	4.49592	7.10512	FLNA	0.0333333	0.686337
GO_Biological_Process_2021	regulation of Wnt signaling pathway	2/111	0.208598	0.319019	0	0	2.39844	3.75919	FRZB;GRB10	0.018018	0.68069
GO_Biological_Process_2021	regulation of protein serine/threonine kinase activity	2/111	0.208598	0.319019	0	0	2.39844	3.75919	CDC25C;CDK5R2	0.018018	0.68069
GO_Biological_Process_2021	regulation of cytoskeleton organization	2/112	0.211395	0.321407	0	0	2.37652	3.69317	CCDC88A;PAK3	0.0178571	0.674905
GO_Biological_Process_2021	regulation of cellular component size	1/31	0.211987	0.321407	0	0	4.34583	6.74139	RAB3B	0.0322581	0.673691
GO_Biological_Process_2021	negative regulation of interleukin-6 production	1/31	0.211987	0.321407	0	0	4.34583	6.74139	SELENOS	0.0322581	0.673691
GO_Biological_Process_2021	negative regulation of osteoblast differentiation	1/31	0.211987	0.321407	0	0	4.34583	6.74139	BAMBI	0.0322581	0.673691
GO_Biological_Process_2021	proteoglycan biosynthetic process	1/31	0.211987	0.321407	0	0	4.34583	6.74139	B3GAT2	0.0322581	0.673691
GO_Biological_Process_2021	protein palmitoylation	1/31	0.211987	0.321407	0	0	4.34583	6.74139	ZDHHC2	0.0322581	0.673691
GO_Biological_Process_2021	positive regulation of proteolysis involved in cellular protein catabolic process	1/31	0.211987	0.321407	0	0	4.34583	6.74139	NUPR1	0.0322581	0.673691
GO_Biological_Process_2021	regulation of developmental growth	1/31	0.211987	0.321407	0	0	4.34583	6.74139	APOE	0.0322581	0.673691
KEGG_2021_Human	Cell adhesion molecules	4/148	0.0270925	0.322065	0	0	3.67319	13.2547	VCAN;NFASC;ALCAM;ITGA4	0.027027	1.56715
KEGG_2021_Human	ErbB signaling pathway	3/85	0.0274831	0.322065	0	0	4.82073	17.3266	CAMK2B;TGFA;PAK3	0.0352941	1.56093
KEGG_2021_Human	ECM-receptor interaction	3/88	0.0300372	0.322065	0	0	4.64988	16.2993	ITGA4;ITGA1;COL6A3	0.0340909	1.52234
KEGG_2021_Human	Alanine, aspartate and glutamate metabolism	2/37	0.0325123	0.322065	0	0	7.49745	25.6873	GLUD1;ASNS	0.0540541	1.48795
KEGG_2021_Human	D-Glutamine and D-glutamate metabolism	1/5	0.0376727	0.322065	0	0	32.6365	107.009	GLUD1	0.2	1.42397
KEGG_2021_Human	Circadian entrainment	3/97	0.0384225	0.322065	0	0	4.20277	13.6973	GNAO1;CAMK2B;PRKG1	0.0309278	1.41541
KEGG_2021_Human	Prostate cancer	3/97	0.0384225	0.322065	0	0	4.20277	13.6973	ZEB1;TCF7;TGFA	0.0309278	1.41541
KEGG_2021_Human	Ferroptosis	2/41	0.0392478	0.322065	0	0	6.72712	21.7815	PRNP;SLC3A2	0.0487805	1.40618
KEGG_2021_Human	cGMP-PKG signaling pathway	4/167	0.0395518	0.322065	0	0	3.2419	10.4718	RGS2;KCNJ8;GATA4;PRKG1	0.0239521	1.40283
GO_Biological_Process_2021	positive regulation of apoptotic process	4/310	0.213796	0.323801	0	0	1.71435	2.64478	PRNP;FRZB;NUPR1;TPD52L1	0.0129032	0.670001
GO_Biological_Process_2021	sulfur compound biosynthetic process	2/113	0.214196	0.324058	0	0	2.35499	3.62872	VCAN;CHAC2	0.0176991	0.669188
GO_Biological_Process_2021	mitotic cell cycle phase transition	3/209	0.215383	0.324614	0	0	1.90689	2.92773	CDC25C;TPD52L1;TUBA4A	0.0143541	0.666789
GO_Biological_Process_2021	positive regulation of cellular component organization	2/114	0.217001	0.324614	0	0	2.33385	3.56577	CAMK2B;APOE	0.0175439	0.663538
GO_Biological_Process_2021	cellular response to transforming growth factor beta stimulus	2/114	0.217001	0.324614	0	0	2.33385	3.56577	BAMBI;SOX5	0.0175439	0.663538
GO_Biological_Process_2021	membrane depolarization	1/32	0.218025	0.324614	0	0	4.20543	6.40549	SCN9A	0.03125	0.661495
GO_Biological_Process_2021	superoxide metabolic process	1/32	0.218025	0.324614	0	0	4.20543	6.40549	MT3	0.03125	0.661495
GO_Biological_Process_2021	liver development	1/32	0.218025	0.324614	0	0	4.20543	6.40549	CEBPA	0.03125	0.661495
GO_Biological_Process_2021	GPI anchor biosynthetic process	1/32	0.218025	0.324614	0	0	4.20543	6.40549	PGAP1	0.03125	0.661495
GO_Biological_Process_2021	regulation of transcription involved in G1/S transition of mitotic cell cycle	1/32	0.218025	0.324614	0	0	4.20543	6.40549	ID2	0.03125	0.661495
GO_Biological_Process_2021	endodermal cell differentiation	1/32	0.218025	0.324614	0	0	4.20543	6.40549	ITGA4	0.03125	0.661495
GO_Biological_Process_2021	regulation of NMDA receptor activity	1/32	0.218025	0.324614	0	0	4.20543	6.40549	CAMK2B	0.03125	0.661495
GO_Biological_Process_2021	chondrocyte differentiation	1/32	0.218025	0.324614	0	0	4.20543	6.40549	SOX5	0.03125	0.661495
GO_Biological_Process_2021	cellular response to glucose stimulus	1/32	0.218025	0.324614	0	0	4.20543	6.40549	MLXIPL	0.03125	0.661495
GO_Biological_Process_2021	regulation of chemotaxis	1/32	0.218025	0.324614	0	0	4.20543	6.40549	CXCR4	0.03125	0.661495
GO_Biological_Process_2021	negative regulation of microtubule polymerization or depolymerization	1/32	0.218025	0.324614	0	0	4.20543	6.40549	MAP2	0.03125	0.661495
GO_Biological_Process_2021	aortic valve morphogenesis	1/32	0.218025	0.324614	0	0	4.20543	6.40549	GATA4	0.03125	0.661495
Reactome_2016	Integrin cell surface interactions	2/67	0.0931994	0.325509	0	0	4.03097	9.56556	ITGA4;ITGA1	0.0298507	1.03059
Reactome_2016	Platelet Adhesion to exposed collagen	1/13	0.0950378	0.325509	0	0	10.8745	25.5928	ITGA1	0.0769231	1.0221
Reactome_2016	COPII (Coat Protein 2) Mediated Vesicle Transport	2/68	0.0955596	0.325509	0	0	3.9697	9.32087	CTSZ;TGFA	0.0294118	1.01973
Reactome_2016	Beta-catenin independent WNT signaling	3/144	0.0985467	0.325509	0	0	2.79518	6.47705	GNAO1;TCF7;PRKG1	0.0208333	1.00636
Reactome_2016	trans-Golgi Network Vesicle Budding	2/70	0.100331	0.325509	0	0	3.85255	8.8581	CTSZ;TPD52L1	0.0285714	0.998565
Reactome_2016	Clathrin derived vesicle budding	2/70	0.100331	0.325509	0	0	3.85255	8.8581	CTSZ;TPD52L1	0.0285714	0.998565
Reactome_2016	SEMA3A-Plexin repulsion signaling by inhibiting Integrin adhesion	1/14	0.101965	0.325509	0	0	10.0374	22.9167	PLXNA4	0.0714286	0.991548
Reactome_2016	Activation of Rac	1/14	0.101965	0.325509	0	0	10.0374	22.9167	PAK3	0.0714286	0.991548
Reactome_2016	Repression of WNT target genes	1/14	0.101965	0.325509	0	0	10.0374	22.9167	TCF7	0.0714286	0.991548
Reactome_2016	CS/DS degradation	1/14	0.101965	0.325509	0	0	10.0374	22.9167	VCAN	0.0714286	0.991548
Reactome_2016	Early Phase of HIV Life Cycle	1/14	0.101965	0.325509	0	0	10.0374	22.9167	CXCR4	0.0714286	0.991548
Reactome_2016	Glutathione synthesis and recycling	1/14	0.101965	0.325509	0	0	10.0374	22.9167	CHAC2	0.0714286	0.991548
Reactome_2016	Class A/1 (Rhodopsin-like receptors)	5/323	0.102558	0.325509	0	0	2.07473	4.72484	PTGFR;GAL;PRLHR;CXCR4;SSTR1	0.0154799	0.989032
GO_Biological_Process_2021	calcium ion transport	2/115	0.219809	0.326925	0	0	2.31308	3.5043	TRPC5;SLC3A2	0.0173913	0.657955
Reactome_2016	Metabolism of vitamins and cofactors	3/148	0.104788	0.328319	0	0	2.71752	6.13021	GPC5;APOE;GPC6	0.0202703	0.979687
Reactome_2016	Signaling by TGF-beta Receptor Complex	2/73	0.107609	0.328319	0	0	3.68921	8.22416	BAMBI;JUNB	0.0273973	0.96815
Reactome_2016	Disorders of transmembrane transporters	1/15	0.10884	0.328319	0	0	9.32002	20.6706	KCNJ11	0.0666667	0.963211
Reactome_2016	CREB phosphorylation through the activation of CaMKII	1/15	0.10884	0.328319	0	0	9.32002	20.6706	CAMK2B	0.0666667	0.963211
Reactome_2016	Eicosanoid ligand-binding receptors	1/15	0.10884	0.328319	0	0	9.32002	20.6706	PTGFR	0.0666667	0.963211
Reactome_2016	N-Glycan antennae elongation	1/15	0.10884	0.328319	0	0	9.32002	20.6706	MGAT4C	0.0666667	0.963211
GO_Biological_Process_2021	negative regulation of inflammatory response	3/212	0.22137	0.328899	0	0	1.87923	2.83373	SELENOS;GCG;APOE	0.0141509	0.654881
Reactome_2016	Binding and Uptake of Ligands by Scavenger Receptors	2/74	0.110066	0.329297	0	0	3.63779	8.0274	HBB;APOE	0.027027	0.958345
GO_Biological_Process_2021	sphingolipid metabolic process	2/116	0.22262	0.329698	0	0	2.29267	3.44425	CERKL;ELOVL6	0.0172414	0.652436
GO_Biological_Process_2021	positive regulation of cholesterol transport	1/33	0.224016	0.329698	0	0	4.07381	6.09457	APOE	0.030303	0.64972
GO_Biological_Process_2021	regulation of interleukin-17 production	1/33	0.224016	0.329698	0	0	4.07381	6.09457	PRNP	0.030303	0.64972
GO_Biological_Process_2021	negative regulation of smooth muscle cell proliferation	1/33	0.224016	0.329698	0	0	4.07381	6.09457	PRKG1	0.030303	0.64972
GO_Biological_Process_2021	regulation of cholesterol efflux	1/33	0.224016	0.329698	0	0	4.07381	6.09457	APOE	0.030303	0.64972
GO_Biological_Process_2021	very long-chain fatty acid metabolic process	1/33	0.224016	0.329698	0	0	4.07381	6.09457	ELOVL6	0.030303	0.64972
GO_Biological_Process_2021	actin filament bundle organization	1/33	0.224016	0.329698	0	0	4.07381	6.09457	DPYSL3	0.030303	0.64972
GO_Biological_Process_2021	RNA stabilization	1/33	0.224016	0.329698	0	0	4.07381	6.09457	TENT5A	0.030303	0.64972
GO_Biological_Process_2021	actin filament bundle assembly	1/33	0.224016	0.329698	0	0	4.07381	6.09457	DPYSL3	0.030303	0.64972
KEGG_2021_Human	Melanogenesis	3/101	0.0424929	0.330285	0	0	4.03041	12.7297	GNAO1;CAMK2B;TCF7	0.029703	1.37168
KEGG_2021_Human	Protein digestion and absorption	3/103	0.0446061	0.331637	0	0	3.9494	12.2822	SLC7A8;COL6A3;SLC3A2	0.0291262	1.35061
GO_Biological_Process_2021	organelle assembly	5/425	0.226567	0.333104	0	0	1.56266	2.3201	RFX2;SCLT1;FLNA;SEPTIN6;PGM5	0.0117647	0.644803
GO_Biological_Process_2021	regulation of cellular response to stress	2/118	0.228251	0.334253	0	0	2.25291	3.32825	CAMK2B;NUPR1	0.0169492	0.641588
GO_Biological_Process_2021	negative regulation of response to external stimulus	2/118	0.228251	0.334253	0	0	2.25291	3.32825	SELENOS;APOE	0.0169492	0.641588
GO_Biological_Process_2021	regulation of protein binding	2/118	0.228251	0.334253	0	0	2.25291	3.32825	BAMBI;CTSZ	0.0169492	0.641588
GO_Biological_Process_2021	striated muscle tissue development	1/34	0.229962	0.334253	0	0	3.95016	5.8061	PGM5	0.0294118	0.638343
GO_Biological_Process_2021	protein insertion into membrane	1/34	0.229962	0.334253	0	0	3.95016	5.8061	PRNP	0.0294118	0.638343
GO_Biological_Process_2021	protein destabilization	1/34	0.229962	0.334253	0	0	3.95016	5.8061	PRNP	0.0294118	0.638343
GO_Biological_Process_2021	cellular response to vascular endothelial growth factor stimulus	1/34	0.229962	0.334253	0	0	3.95016	5.8061	EGR3	0.0294118	0.638343
GO_Biological_Process_2021	positive regulation of protein dephosphorylation	1/34	0.229962	0.334253	0	0	3.95016	5.8061	ITGA1	0.0294118	0.638343
GO_Biological_Process_2021	regulation of glucose metabolic process	1/34	0.229962	0.334253	0	0	3.95016	5.8061	SELENOS	0.0294118	0.638343
GO_Biological_Process_2021	negative regulation of blood vessel endothelial cell migration	1/34	0.229962	0.334253	0	0	3.95016	5.8061	APOE	0.0294118	0.638343
GO_Biological_Process_2021	regulation of activated T cell proliferation	1/34	0.229962	0.334253	0	0	3.95016	5.8061	PRNP	0.0294118	0.638343
Reactome_2016	Rap1 signalling	1/16	0.115662	0.335054	0	0	8.69825	18.7628	PRKG1	0.0625	0.936808
Reactome_2016	Polo-like kinase mediated events	1/16	0.115662	0.335054	0	0	8.69825	18.7628	CDC25C	0.0625	0.936808
Reactome_2016	Metabolism of Angiotensinogen to Angiotensins	1/16	0.115662	0.335054	0	0	8.69825	18.7628	CTSZ	0.0625	0.936808
Reactome_2016	Cell-extracellular matrix interactions	1/16	0.115662	0.335054	0	0	8.69825	18.7628	FLNA	0.0625	0.936808
GO_Biological_Process_2021	regulation of cell growth	3/217	0.231422	0.336028	0	0	1.83486	2.68534	FRZB;ROS1;MT3	0.0138249	0.635594
GO_Biological_Process_2021	regulation of nucleic acid-templated transcription	5/430	0.233561	0.33623	0	0	1.54388	2.24528	MLXIPL;CEBPA;TCF7;GATA4;ELAVL2	0.0116279	0.6316
GO_Biological_Process_2021	cellular response to oxygen-containing compound	4/323	0.234858	0.33623	0	0	1.64339	2.3809	SELENOS;INSIG1;SSTR1;MT3	0.0123839	0.629195
GO_Biological_Process_2021	cellular response to lipid	3/219	0.235467	0.33623	0	0	1.81769	2.62871	SELENOS;INSIG1;SSTR1	0.0136986	0.628069
GO_Biological_Process_2021	regulation of autophagosome assembly	1/35	0.235863	0.33623	0	0	3.83378	5.53792	NUPR1	0.0285714	0.62734
GO_Biological_Process_2021	negative regulation of epithelial cell migration	1/35	0.235863	0.33623	0	0	3.83378	5.53792	APOE	0.0285714	0.62734
GO_Biological_Process_2021	bicarbonate transport	1/35	0.235863	0.33623	0	0	3.83378	5.53792	HBB	0.0285714	0.62734
GO_Biological_Process_2021	lung development	1/35	0.235863	0.33623	0	0	3.83378	5.53792	CEBPA	0.0285714	0.62734
GO_Biological_Process_2021	response to exogenous dsRNA	1/35	0.235863	0.33623	0	0	3.83378	5.53792	SLC3A2	0.0285714	0.62734
GO_Biological_Process_2021	respiratory system development	1/35	0.235863	0.33623	0	0	3.83378	5.53792	CEBPA	0.0285714	0.62734
GO_Biological_Process_2021	regulation of T cell receptor signaling pathway	1/35	0.235863	0.33623	0	0	3.83378	5.53792	PRNP	0.0285714	0.62734
GO_Biological_Process_2021	regulation of regulated secretory pathway	1/35	0.235863	0.33623	0	0	3.83378	5.53792	RIMS2	0.0285714	0.62734
GO_Biological_Process_2021	peptidyl-tyrosine dephosphorylation	1/35	0.235863	0.33623	0	0	3.83378	5.53792	DUSP1	0.0285714	0.62734
GO_Biological_Process_2021	regulation of muscle cell differentiation	1/35	0.235863	0.33623	0	0	3.83378	5.53792	ID2	0.0285714	0.62734
GO_Biological_Process_2021	negative regulation of T cell proliferation	1/35	0.235863	0.33623	0	0	3.83378	5.53792	PRNP	0.0285714	0.62734
GO_Biological_Process_2021	cellular response to hydrogen peroxide	1/35	0.235863	0.33623	0	0	3.83378	5.53792	FABP1	0.0285714	0.62734
GO_Biological_Process_2021	negative regulation of organelle assembly	1/35	0.235863	0.33623	0	0	3.83378	5.53792	NUPR1	0.0285714	0.62734
GO_Biological_Process_2021	negative regulation of neurogenesis	1/35	0.235863	0.33623	0	0	3.83378	5.53792	PAX6	0.0285714	0.62734
GO_Biological_Process_2021	blood vessel diameter maintenance	1/35	0.235863	0.33623	0	0	3.83378	5.53792	SERPINF2	0.0285714	0.62734
GO_Biological_Process_2021	potassium ion transport	2/122	0.239541	0.339991	0	0	2.17737	3.11154	KCNJ11;KCNJ8	0.0163934	0.620621
GO_Biological_Process_2021	regulation of cell cycle G1/S phase transition	1/36	0.241719	0.339991	0	0	3.72406	5.28809	ID2	0.0277778	0.616689
GO_Biological_Process_2021	positive regulation of substrate adhesion-dependent cell spreading	1/36	0.241719	0.339991	0	0	3.72406	5.28809	FLNA	0.0277778	0.616689
GO_Biological_Process_2021	axonal transport	1/36	0.241719	0.339991	0	0	3.72406	5.28809	KIF1A	0.0277778	0.616689
GO_Biological_Process_2021	aortic valve development	1/36	0.241719	0.339991	0	0	3.72406	5.28809	GATA4	0.0277778	0.616689
GO_Biological_Process_2021	negative regulation of DNA metabolic process	1/36	0.241719	0.339991	0	0	3.72406	5.28809	H1-3	0.0277778	0.616689
GO_Biological_Process_2021	Wnt signaling pathway, calcium modulating pathway	1/36	0.241719	0.339991	0	0	3.72406	5.28809	GNAO1	0.0277778	0.616689
GO_Biological_Process_2021	calcium-dependent cell-cell adhesion via plasma membrane cell adhesion molecules	1/36	0.241719	0.339991	0	0	3.72406	5.28809	CDH17	0.0277778	0.616689
GO_Biological_Process_2021	embryonic limb morphogenesis	1/36	0.241719	0.339991	0	0	3.72406	5.28809	FBXW4	0.0277778	0.616689
GO_Biological_Process_2021	regulation of protein import into nucleus	1/36	0.241719	0.339991	0	0	3.72406	5.28809	FLNA	0.0277778	0.616689
GO_Biological_Process_2021	positive regulation of cytokine-mediated signaling pathway	1/36	0.241719	0.339991	0	0	3.72406	5.28809	CXCR4	0.0277778	0.616689
GO_Biological_Process_2021	positive regulation of mitotic nuclear division	1/36	0.241719	0.339991	0	0	3.72406	5.28809	TGFA	0.0277778	0.616689
GO_Biological_Process_2021	positive regulation of myeloid leukocyte differentiation	1/36	0.241719	0.339991	0	0	3.72406	5.28809	ID2	0.0277778	0.616689
GO_Biological_Process_2021	cellular response to organic substance	2/123	0.242368	0.339991	0	0	2.15927	3.06033	DPYSL3;CXCR4	0.0162602	0.615525
GO_Biological_Process_2021	regulation of anatomical structure morphogenesis	2/123	0.242368	0.339991	0	0	2.15927	3.06033	KIF1A;PAK3	0.0162602	0.615525
GO_Biological_Process_2021	positive regulation of epithelial cell proliferation	2/123	0.242368	0.339991	0	0	2.15927	3.06033	EGR3;TGFA	0.0162602	0.615525
GO_Biological_Process_2021	non-canonical Wnt signaling pathway	2/124	0.245196	0.342791	0	0	2.14146	3.01024	GNAO1;FRZB	0.016129	0.610486
GO_Biological_Process_2021	regulation of p38MAPK cascade	1/37	0.24753	0.342791	0	0	3.62043	5.05493	DUSP1	0.027027	0.606372
GO_Biological_Process_2021	negative regulation of stress-activated MAPK cascade	1/37	0.24753	0.342791	0	0	3.62043	5.05493	DUSP1	0.027027	0.606372
GO_Biological_Process_2021	protein insertion into ER membrane	1/37	0.24753	0.342791	0	0	3.62043	5.05493	PRNP	0.027027	0.606372
GO_Biological_Process_2021	positive regulation of signaling receptor activity	1/37	0.24753	0.342791	0	0	3.62043	5.05493	TGFA	0.027027	0.606372
GO_Biological_Process_2021	lysosome localization	1/37	0.24753	0.342791	0	0	3.62043	5.05493	CHGA	0.027027	0.606372
GO_Biological_Process_2021	glutamine family amino acid metabolic process	1/37	0.24753	0.342791	0	0	3.62043	5.05493	GLUD1	0.027027	0.606372
GO_Biological_Process_2021	regulation of vascular associated smooth muscle cell proliferation	1/37	0.24753	0.342791	0	0	3.62043	5.05493	PRKG1	0.027027	0.606372
GO_Biological_Process_2021	negative regulation of epithelial cell apoptotic process	1/37	0.24753	0.342791	0	0	3.62043	5.05493	NUPR1	0.027027	0.606372
GO_Biological_Process_2021	negative regulation of endothelial cell proliferation	1/37	0.24753	0.342791	0	0	3.62043	5.05493	APOE	0.027027	0.606372
GO_Biological_Process_2021	anterograde axonal transport	1/37	0.24753	0.342791	0	0	3.62043	5.05493	KIF1A	0.027027	0.606372
GO_Biological_Process_2021	proton transmembrane transport	1/37	0.24753	0.342791	0	0	3.62043	5.05493	OTOP3	0.027027	0.606372
GO_Biological_Process_2021	acyl-CoA metabolic process	1/37	0.24753	0.342791	0	0	3.62043	5.05493	HMGCS1	0.027027	0.606372
Reactome_2016	Synthesis, secretion, and deacylation of Ghrelin	1/17	0.122433	0.343754	0	0	8.15419	17.1254	GCG	0.0588235	0.912101
Reactome_2016	Ras activation uopn Ca2+ infux through NMDA receptor	1/17	0.122433	0.343754	0	0	8.15419	17.1254	CAMK2B	0.0588235	0.912101
Reactome_2016	Unblocking of NMDA receptor, glutamate binding and activation	1/17	0.122433	0.343754	0	0	8.15419	17.1254	CAMK2B	0.0588235	0.912101
Reactome_2016	Chylomicron-mediated lipid transport	1/17	0.122433	0.343754	0	0	8.15419	17.1254	APOE	0.0588235	0.912101
KEGG_2021_Human	Type II diabetes mellitus	2/46	0.0483346	0.344384	0	0	5.96117	18.06	KCNJ11;PKLR	0.0434783	1.31574
GO_Biological_Process_2021	negative regulation of growth	2/126	0.250858	0.347057	0	0	2.10671	2.9133	FRZB;MT3	0.015873	0.600573
GO_Biological_Process_2021	negative regulation of endothelial cell migration	1/38	0.253297	0.348377	0	0	3.5224	4.83693	APOE	0.0263158	0.596369
GO_Biological_Process_2021	regulation of phosphoprotein phosphatase activity	1/38	0.253297	0.348377	0	0	3.5224	4.83693	ITGA1	0.0263158	0.596369
GO_Biological_Process_2021	response to estradiol	1/38	0.253297	0.348377	0	0	3.5224	4.83693	SSTR1	0.0263158	0.596369
GO_Biological_Process_2021	positive regulation of potassium ion transport	1/38	0.253297	0.348377	0	0	3.5224	4.83693	FLNA	0.0263158	0.596369
GO_Biological_Process_2021	positive regulation of signaling	1/38	0.253297	0.348377	0	0	3.5224	4.83693	RIMS2	0.0263158	0.596369
GO_Biological_Process_2021	ventricular septum development	1/38	0.253297	0.348377	0	0	3.5224	4.83693	GATA4	0.0263158	0.596369
Reactome_2016	Regulation of insulin secretion	2/80	0.125106	0.348577	0	0	3.35694	6.97772	KCNJ11;GCG	0.025	0.902723
Reactome_2016	Transport to the Golgi and subsequent modification	3/162	0.127795	0.351795	0	0	2.47648	5.09493	MGAT4C;CTSZ;TGFA	0.0185185	0.893487
Reactome_2016	cGMP effects	1/18	0.129152	0.351795	0	0	7.67415	15.7072	PRKG1	0.0555556	0.888898
Reactome_2016	TP53 Regulates Transcription of Genes Involved in G2 Cell Cycle Arrest	1/18	0.129152	0.351795	0	0	7.67415	15.7072	CDC25C	0.0555556	0.888898
GO_Biological_Process_2021	plasma membrane bounded cell projection organization	2/128	0.256523	0.352118	0	0	2.07306	2.82047	MAP2;APOE	0.015625	0.590874
GO_Biological_Process_2021	vesicle cytoskeletal trafficking	1/39	0.259021	0.352118	0	0	3.42954	4.63278	KIF1A	0.025641	0.586666
GO_Biological_Process_2021	protein acylation	1/39	0.259021	0.352118	0	0	3.42954	4.63278	ZDHHC2	0.025641	0.586666
GO_Biological_Process_2021	positive regulation of intracellular transport	1/39	0.259021	0.352118	0	0	3.42954	4.63278	PGAP1	0.025641	0.586666
GO_Biological_Process_2021	response to peptide	1/39	0.259021	0.352118	0	0	3.42954	4.63278	PRNP	0.025641	0.586666
GO_Biological_Process_2021	regulation of T cell differentiation	1/39	0.259021	0.352118	0	0	3.42954	4.63278	TCF7	0.025641	0.586666
GO_Biological_Process_2021	regulation of protein tyrosine kinase activity	1/39	0.259021	0.352118	0	0	3.42954	4.63278	PRNP	0.025641	0.586666
GO_Biological_Process_2021	endothelial cell migration	1/39	0.259021	0.352118	0	0	3.42954	4.63278	EGR3	0.025641	0.586666
GO_Biological_Process_2021	regulation of nitric-oxide synthase activity	1/39	0.259021	0.352118	0	0	3.42954	4.63278	APOE	0.025641	0.586666
GO_Biological_Process_2021	regulation of intracellular transport	1/39	0.259021	0.352118	0	0	3.42954	4.63278	MAP2	0.025641	0.586666
GO_Biological_Process_2021	cellular response to ketone	1/39	0.259021	0.352118	0	0	3.42954	4.63278	PTGFR	0.025641	0.586666
GO_Biological_Process_2021	regulation of cellular component biogenesis	1/39	0.259021	0.352118	0	0	3.42954	4.63278	APOE	0.025641	0.586666
GO_Biological_Process_2021	muscle contraction	2/129	0.259356	0.352234	0	0	2.05663	2.77553	GNAO1;ITGA1	0.0155039	0.586103
GO_Biological_Process_2021	positive regulation of transcription by RNA polymerase II	9/908	0.260138	0.352955	0	0	1.3173	1.7738	MLXIPL;TOX3;CEBPA;GAL;ONECUT2;SERPINF2;GATA4;PAX6;JUNB	0.00991189	0.584796
GO_Biological_Process_2021	positive regulation of canonical Wnt signaling pathway	2/130	0.26219	0.355055	0	0	2.04046	2.73153	BAMBI;GPC5	0.0153846	0.581383
GO_Biological_Process_2021	regulation of response to external stimulus	2/130	0.26219	0.355055	0	0	2.04046	2.73153	AHSG;CXCR4	0.0153846	0.581383
GO_Biological_Process_2021	positive regulation of cation channel activity	1/40	0.2647	0.355133	0	0	3.34143	4.44129	GAL	0.025	0.577246
GO_Biological_Process_2021	positive regulation of ossification	1/40	0.2647	0.355133	0	0	3.34143	4.44129	ZBTB16	0.025	0.577246
GO_Biological_Process_2021	positive regulation of intrinsic apoptotic signaling pathway	1/40	0.2647	0.355133	0	0	3.34143	4.44129	NUPR1	0.025	0.577246
GO_Biological_Process_2021	glycolipid biosynthetic process	1/40	0.2647	0.355133	0	0	3.34143	4.44129	ST6GALNAC5	0.025	0.577246
GO_Biological_Process_2021	positive regulation of catalytic activity	1/40	0.2647	0.355133	0	0	3.34143	4.44129	MT3	0.025	0.577246
GO_Biological_Process_2021	regulation of nitric oxide biosynthetic process	1/40	0.2647	0.355133	0	0	3.34143	4.44129	HBB	0.025	0.577246
GO_Biological_Process_2021	digestive tract development	1/40	0.2647	0.355133	0	0	3.34143	4.44129	GATA4	0.025	0.577246
GO_Biological_Process_2021	regulation of microtubule polymerization	1/40	0.2647	0.355133	0	0	3.34143	4.44129	MAP2	0.025	0.577246
GO_Biological_Process_2021	carboxylic acid metabolic process	1/40	0.2647	0.355133	0	0	3.34143	4.44129	GLUD1	0.025	0.577246
GO_Biological_Process_2021	cellular response to metal ion	2/131	0.265025	0.355133	0	0	2.02454	2.68845	PRNP;MT3	0.0152672	0.576714
GO_Biological_Process_2021	cellular response to hypoxia	2/131	0.265025	0.355133	0	0	2.02454	2.68845	FABP1;MT3	0.0152672	0.576714
KEGG_2021_Human	Intestinal immune network for IgA production	2/48	0.0521631	0.356796	0	0	5.70141	16.8384	ITGA4;CXCR4	0.0416667	1.28264
Reactome_2016	Metabolism of lipids and lipoproteins	8/659	0.133407	0.359234	0	0	1.62687	3.27708	FABP1;FAAH;HMGCS1;FABP5;INSIG1;DPEP2;ELOVL6;APOE	0.0121396	0.874821
Reactome_2016	HDL-mediated lipid transport	1/19	0.13582	0.359234	0	0	7.24744	14.469	APOE	0.0526316	0.867036
Reactome_2016	Scavenging by Class A Receptors	1/19	0.13582	0.359234	0	0	7.24744	14.469	APOE	0.0526316	0.867036
Reactome_2016	Ephrin signaling	1/19	0.13582	0.359234	0	0	7.24744	14.469	PAK3	0.0526316	0.867036
GO_Biological_Process_2021	negative regulation of transcription by RNA polymerase II	7/684	0.270013	0.359512	0	0	1.35762	1.77751	ZEB1;ZBTB16;ID2;ID4;ID3;PAX6;MXD1	0.0102339	0.568615
GO_Biological_Process_2021	regulation of filopodium assembly	1/41	0.270336	0.359512	0	0	3.25773	4.2614	DPYSL3	0.0243902	0.568095
GO_Biological_Process_2021	acylglycerol metabolic process	1/41	0.270336	0.359512	0	0	3.25773	4.2614	APOE	0.0243902	0.568095
GO_Biological_Process_2021	carbohydrate catabolic process	1/41	0.270336	0.359512	0	0	3.25773	4.2614	PKLR	0.0243902	0.568095
GO_Biological_Process_2021	positive regulation of cation transmembrane transport	1/41	0.270336	0.359512	0	0	3.25773	4.2614	FLNA	0.0243902	0.568095
GO_Biological_Process_2021	import into cell	1/41	0.270336	0.359512	0	0	3.25773	4.2614	SLC7A8	0.0243902	0.568095
GO_Biological_Process_2021	T cell differentiation	1/41	0.270336	0.359512	0	0	3.25773	4.2614	TCF7	0.0243902	0.568095
GO_Biological_Process_2021	visual system development	1/41	0.270336	0.359512	0	0	3.25773	4.2614	PAX6	0.0243902	0.568095
GO_Biological_Process_2021	transmembrane receptor protein serine/threonine kinase signaling pathway	2/133	0.270693	0.359646	0	0	1.99343	2.60495	BAMBI;RGMB	0.0150376	0.567522
Reactome_2016	Asparagine N-linked glycosylation	4/259	0.137623	0.361385	0	0	2.06259	4.09059	MGAT4C;CTSZ;TGFA;ST6GALNAC5	0.015444	0.861308
GO_Biological_Process_2021	negative regulation of protein catabolic process	1/42	0.27593	0.364538	0	0	3.17811	4.09217	FLNA	0.0238095	0.559201
GO_Biological_Process_2021	positive regulation of epithelial to mesenchymal transition	1/42	0.27593	0.364538	0	0	3.17811	4.09217	BAMBI	0.0238095	0.559201
GO_Biological_Process_2021	ceramide biosynthetic process	1/42	0.27593	0.364538	0	0	3.17811	4.09217	ST6GALNAC5	0.0238095	0.559201
GO_Biological_Process_2021	heterophilic cell-cell adhesion via plasma membrane cell adhesion molecules	1/42	0.27593	0.364538	0	0	3.17811	4.09217	ALCAM	0.0238095	0.559201
GO_Biological_Process_2021	regulation of DNA recombination	1/42	0.27593	0.364538	0	0	3.17811	4.09217	H1-3	0.0238095	0.559201
GO_Biological_Process_2021	regulation of chemokine production	1/42	0.27593	0.364538	0	0	3.17811	4.09217	CHIA	0.0238095	0.559201
Reactome_2016	Cell junction organization	2/86	0.140601	0.365011	0	0	3.11621	6.11347	FLNA;CDH17	0.0232558	0.852011
Reactome_2016	Chondroitin sulfate biosynthesis	1/20	0.142437	0.365011	0	0	6.86565	13.3801	VCAN	0.05	0.846376
Reactome_2016	IL-6-type cytokine receptor ligand interactions	1/20	0.142437	0.365011	0	0	6.86565	13.3801	LIFR	0.05	0.846376
Reactome_2016	NCAM signaling for neurite out-growth	4/266	0.147343	0.365011	0	0	2.00676	3.84293	CAMK2B;PRNP;DUSP1;COL6A3	0.0150376	0.83167
Reactome_2016	Aflatoxin activation and detoxification	1/21	0.149004	0.365011	0	0	6.52204	12.4165	DPEP2	0.047619	0.826801
Reactome_2016	Synthesis of Leukotrienes (LT) and Eoxins (EX)	1/21	0.149004	0.365011	0	0	6.52204	12.4165	DPEP2	0.047619	0.826801
Reactome_2016	Synthesis of very long-chain fatty acyl-CoAs	1/21	0.149004	0.365011	0	0	6.52204	12.4165	ELOVL6	0.047619	0.826801
Reactome_2016	TP53 regulates transcription of additional cell cycle genes whose exact role in the p53 pathway remain uncertain	1/21	0.149004	0.365011	0	0	6.52204	12.4165	CDC25C	0.047619	0.826801
Reactome_2016	Regulation of Insulin-like Growth Factor (IGF) transport and uptake by Insulin-like Growth Factor Binding Proteins (IGFBPs)	1/21	0.149004	0.365011	0	0	6.52204	12.4165	KLK1	0.047619	0.826801
Reactome_2016	CD209 (DC-SIGN) signaling	1/21	0.149004	0.365011	0	0	6.52204	12.4165	PAK3	0.047619	0.826801
GO_Biological_Process_2021	cellular calcium ion homeostasis	2/136	0.279194	0.366351	0	0	1.9485	2.48599	SCGN;TRPC5	0.0147059	0.554094
GO_Biological_Process_2021	negative regulation of inflammatory response to antigenic stimulus	2/136	0.279194	0.366351	0	0	1.9485	2.48599	SELENOS;GCG	0.0147059	0.554094
GO_Biological_Process_2021	cellular response to glucose starvation	1/43	0.281481	0.366351	0	0	3.10229	3.93274	ASNS	0.0232558	0.550552
GO_Biological_Process_2021	regulation of cell-cell adhesion	1/43	0.281481	0.366351	0	0	3.10229	3.93274	ZDHHC2	0.0232558	0.550552
GO_Biological_Process_2021	substantia nigra development	1/43	0.281481	0.366351	0	0	3.10229	3.93274	GLUD1	0.0232558	0.550552
GO_Biological_Process_2021	spermatid development	1/43	0.281481	0.366351	0	0	3.10229	3.93274	RFX2	0.0232558	0.550552
GO_Biological_Process_2021	positive regulation of peptide hormone secretion	1/43	0.281481	0.366351	0	0	3.10229	3.93274	GLUD1	0.0232558	0.550552
GO_Biological_Process_2021	positive regulation of neuron differentiation	1/43	0.281481	0.366351	0	0	3.10229	3.93274	ZEB1	0.0232558	0.550552
GO_Biological_Process_2021	male gonad development	1/43	0.281481	0.366351	0	0	3.10229	3.93274	GATA4	0.0232558	0.550552
GO_Biological_Process_2021	tRNA aminoacylation for protein translation	1/43	0.281481	0.366351	0	0	3.10229	3.93274	TARS3	0.0232558	0.550552
GO_Biological_Process_2021	myofibril assembly	1/43	0.281481	0.366351	0	0	3.10229	3.93274	PGM5	0.0232558	0.550552
GO_Biological_Process_2021	natural killer cell activation	1/43	0.281481	0.366351	0	0	3.10229	3.93274	TOX	0.0232558	0.550552
GO_Biological_Process_2021	heart looping	1/43	0.281481	0.366351	0	0	3.10229	3.93274	GATA4	0.0232558	0.550552
GO_Biological_Process_2021	glutathione metabolic process	1/43	0.281481	0.366351	0	0	3.10229	3.93274	CHAC2	0.0232558	0.550552
GO_Biological_Process_2021	positive regulation of axonogenesis	1/43	0.281481	0.366351	0	0	3.10229	3.93274	PLXNA4	0.0232558	0.550552
GO_Biological_Process_2021	development of primary male sexual characteristics	1/43	0.281481	0.366351	0	0	3.10229	3.93274	GATA4	0.0232558	0.550552
GO_Biological_Process_2021	supramolecular fiber organization	4/351	0.281728	0.366351	0	0	1.50862	1.91113	CCDC88A;SERPINF2;COL6A3;PGM5	0.011396	0.550169
GO_Biological_Process_2021	anterograde trans-synaptic signaling	3/244	0.286893	0.369998	0	0	1.62705	2.03162	GRM4;GRM7;GRIK1	0.0122951	0.542281
GO_Biological_Process_2021	mRNA stabilization	1/44	0.286989	0.369998	0	0	3.02999	3.78237	TENT5A	0.0227273	0.542135
GO_Biological_Process_2021	embryonic organ morphogenesis	1/44	0.286989	0.369998	0	0	3.02999	3.78237	ID2	0.0227273	0.542135
GO_Biological_Process_2021	mitotic spindle assembly	1/44	0.286989	0.369998	0	0	3.02999	3.78237	FLNA	0.0227273	0.542135
GO_Biological_Process_2021	positive regulation of potassium ion transmembrane transport	1/44	0.286989	0.369998	0	0	3.02999	3.78237	FLNA	0.0227273	0.542135
GO_Biological_Process_2021	hexose biosynthetic process	1/44	0.286989	0.369998	0	0	3.02999	3.78237	SORD	0.0227273	0.542135
GO_Biological_Process_2021	neurogenesis	1/44	0.286989	0.369998	0	0	3.02999	3.78237	CXCR4	0.0227273	0.542135
GO_Biological_Process_2021	regulation of endothelial cell apoptotic process	1/44	0.286989	0.369998	0	0	3.02999	3.78237	ITGA4	0.0227273	0.542135
GO_Biological_Process_2021	cardiac ventricle morphogenesis	1/44	0.286989	0.369998	0	0	3.02999	3.78237	GATA4	0.0227273	0.542135
GO_Biological_Process_2021	regulation of cellular component organization	2/139	0.287689	0.369998	0	0	1.90554	2.37407	APOE;ROS1	0.0143885	0.541077
GO_Biological_Process_2021	positive regulation of response to external stimulus	2/139	0.287689	0.369998	0	0	1.90554	2.37407	CEBPA;SERPINF2	0.0143885	0.541077
GO_Biological_Process_2021	potassium ion transmembrane transport	2/139	0.287689	0.369998	0	0	1.90554	2.37407	KCNJ11;KCNJ8	0.0143885	0.541077
Reactome_2016	Post-chaperonin tubulin folding pathway	1/22	0.155521	0.371015	0	0	6.21115	11.5588	TUBA4A	0.0454545	0.80821
Reactome_2016	Cyclin A/B1 associated events during G2/M transition	1/22	0.155521	0.371015	0	0	6.21115	11.5588	CDC25C	0.0454545	0.80821
Reactome_2016	Intrinsic Pathway of Fibrin Clot Formation	1/22	0.155521	0.371015	0	0	6.21115	11.5588	SERPINE2	0.0454545	0.80821
Reactome_2016	Common Pathway of Fibrin Clot Formation	1/22	0.155521	0.371015	0	0	6.21115	11.5588	SERPINE2	0.0454545	0.80821
GO_Biological_Process_2021	enzyme linked receptor protein signaling pathway	2/140	0.290518	0.373296	0	0	1.89164	2.33824	LIFR;ROS1	0.0142857	0.536827
GO_Biological_Process_2021	action potential	1/45	0.292456	0.374418	0	0	2.96097	3.64035	SCN9A	0.0222222	0.53394
GO_Biological_Process_2021	chromosome condensation	1/45	0.292456	0.374418	0	0	2.96097	3.64035	H1-3	0.0222222	0.53394
GO_Biological_Process_2021	zymogen activation	1/45	0.292456	0.374418	0	0	2.96097	3.64035	KLK1	0.0222222	0.53394
GO_Biological_Process_2021	protein deacetylation	1/45	0.292456	0.374418	0	0	2.96097	3.64035	FLNA	0.0222222	0.53394
GO_Biological_Process_2021	positive regulation of cellular catabolic process	2/141	0.293346	0.375216	0	0	1.87794	2.30311	MLXIPL;APOE	0.0141844	0.53262
GO_Biological_Process_2021	protein localization to organelle	2/142	0.296173	0.378488	0	0	1.86443	2.26866	PRNP;SCG3	0.0140845	0.528455
Reactome_2016	RAF-independent MAPK1/3 activation	1/23	0.161989	0.379012	0	0	5.92853	10.7913	DUSP1	0.0434783	0.790516
Reactome_2016	Laminin interactions	1/23	0.161989	0.379012	0	0	5.92853	10.7913	ITGA1	0.0434783	0.790516
Reactome_2016	Cholesterol biosynthesis	1/23	0.161989	0.379012	0	0	5.92853	10.7913	HMGCS1	0.0434783	0.790516
GO_Biological_Process_2021	erythrocyte differentiation	1/46	0.297881	0.379292	0	0	2.89503	3.50606	ID2	0.0217391	0.525958
GO_Biological_Process_2021	positive regulation of organelle assembly	1/46	0.297881	0.379292	0	0	2.89503	3.50606	CCDC88A	0.0217391	0.525958
GO_Biological_Process_2021	positive regulation of nucleocytoplasmic transport	1/46	0.297881	0.379292	0	0	2.89503	3.50606	FLNA	0.0217391	0.525958
GO_Biological_Process_2021	negative regulation of tumor necrosis factor production	1/46	0.297881	0.379292	0	0	2.89503	3.50606	SELENOS	0.0217391	0.525958
GO_Biological_Process_2021	neuron development	2/143	0.298998	0.380027	0	0	1.85111	2.23488	MAP2;APOE	0.013986	0.524332
GO_Biological_Process_2021	receptor-mediated endocytosis	2/143	0.298998	0.380027	0	0	1.85111	2.23488	HBB;APOE	0.013986	0.524332
GO_Biological_Process_2021	regulation of synapse assembly	1/47	0.303264	0.383028	0	0	2.83195	3.37895	GPC6	0.0212766	0.518179
GO_Biological_Process_2021	positive regulation of cell-cell adhesion	1/47	0.303264	0.383028	0	0	2.83195	3.37895	SERPINF2	0.0212766	0.518179
GO_Biological_Process_2021	positive regulation of pathway-restricted SMAD protein phosphorylation	1/47	0.303264	0.383028	0	0	2.83195	3.37895	BMP3	0.0212766	0.518179
GO_Biological_Process_2021	glycosphingolipid metabolic process	1/47	0.303264	0.383028	0	0	2.83195	3.37895	ST6GALNAC5	0.0212766	0.518179
GO_Biological_Process_2021	epidermal growth factor receptor signaling pathway	1/47	0.303264	0.383028	0	0	2.83195	3.37895	TGFA	0.0212766	0.518179
GO_Biological_Process_2021	embryonic heart tube morphogenesis	1/47	0.303264	0.383028	0	0	2.83195	3.37895	GATA4	0.0212766	0.518179
GO_Biological_Process_2021	determination of heart left/right asymmetry	1/47	0.303264	0.383028	0	0	2.83195	3.37895	GATA4	0.0212766	0.518179
Reactome_2016	Anchoring of the basal body to the plasma membrane	2/97	0.169963	0.387314	0	0	2.75385	4.88031	SCLT1;TUBA4A	0.0206186	0.769647
Reactome_2016	Extracellular matrix organization	4/283	0.172	0.387314	0	0	1.88285	3.31431	VCAN;ITGA4;ITGA1;COL6A3	0.0141343	0.764471
Reactome_2016	Nitric oxide stimulates guanylate cyclase	1/25	0.174776	0.387314	0	0	5.43394	9.47814	PRKG1	0.04	0.757518
Reactome_2016	ATF4 activates genes	1/25	0.174776	0.387314	0	0	5.43394	9.47814	ASNS	0.04	0.757518
Reactome_2016	TRP channels	1/25	0.174776	0.387314	0	0	5.43394	9.47814	TRPC5	0.04	0.757518
Reactome_2016	Formation of tubulin folding intermediates by CCT/TriC	1/25	0.174776	0.387314	0	0	5.43394	9.47814	TUBA4A	0.04	0.757518
Reactome_2016	Post-translational modification: synthesis of GPI-anchored proteins	1/25	0.174776	0.387314	0	0	5.43394	9.47814	PGAP1	0.04	0.757518
Reactome_2016	Transport of inorganic cations/anions and amino acids/oligopeptides	2/99	0.175409	0.387314	0	0	2.6968	4.69414	SLC7A8;SLC3A2	0.020202	0.755948
Reactome_2016	Potassium Channels	2/99	0.175409	0.387314	0	0	2.6968	4.69414	KCNJ8;KCNJ11	0.020202	0.755948
Reactome_2016	Vesicle-mediated transport	6/492	0.176148	0.387314	0	0	1.62602	2.82347	CTSZ;HBB;TGFA;APOE;KIF1A;TPD52L1	0.0121951	0.754122
GO_Biological_Process_2021	neutrophil degranulation	5/481	0.307828	0.387687	0	0	1.37484	1.61986	NFASC;FABP5;AHSG;CTSZ;HBB	0.010395	0.511691
GO_Biological_Process_2021	cellular response to alcohol	1/48	0.308607	0.387687	0	0	2.77156	3.25848	PTGFR	0.0208333	0.510595
GO_Biological_Process_2021	regulation of interleukin-2 production	1/48	0.308607	0.387687	0	0	2.77156	3.25848	PRNP	0.0208333	0.510595
GO_Biological_Process_2021	negative regulation of tumor necrosis factor superfamily cytokine production	1/48	0.308607	0.387687	0	0	2.77156	3.25848	SELENOS	0.0208333	0.510595
GO_Biological_Process_2021	positive regulation of endocytosis	1/48	0.308607	0.387687	0	0	2.77156	3.25848	APOE	0.0208333	0.510595
GO_Biological_Process_2021	substrate adhesion-dependent cell spreading	1/48	0.308607	0.387687	0	0	2.77156	3.25848	ITGA4	0.0208333	0.510595
GO_Biological_Process_2021	positive regulation of cytosolic calcium ion concentration	2/147	0.310279	0.38944	0	0	1.79968	2.10614	PTGFR;CXCR4	0.0136054	0.508248
GO_Biological_Process_2021	regulation of gene expression	10/1079	0.312282	0.390512	0	0	1.22839	1.42966	RIMS2;MLXIPL;CEBPA;ID2;TCF7;GATA4;PAX6;APOE;MT3;ELAVL2	0.00926784	0.505452
GO_Biological_Process_2021	protein transport	4/369	0.312603	0.390512	0	0	1.4329	1.6662	RAB3B;RAB3C;ARL4D;APOE	0.0108401	0.505007
GO_Biological_Process_2021	neutrophil activation involved in immune response	5/485	0.31382	0.390512	0	0	1.36311	1.57975	NFASC;FABP5;AHSG;CTSZ;HBB	0.0103093	0.503319
GO_Biological_Process_2021	adherens junction organization	1/49	0.313909	0.390512	0	0	2.71368	3.14421	CDH17	0.0204082	0.503197
GO_Biological_Process_2021	regulation of cellular localization	1/49	0.313909	0.390512	0	0	2.71368	3.14421	MAP2	0.0204082	0.503197
GO_Biological_Process_2021	regulation of cellular protein metabolic process	1/49	0.313909	0.390512	0	0	2.71368	3.14421	APOE	0.0204082	0.503197
GO_Biological_Process_2021	oligosaccharide metabolic process	1/49	0.313909	0.390512	0	0	2.71368	3.14421	ST6GALNAC5	0.0204082	0.503197
GO_Biological_Process_2021	response to glucose	1/49	0.313909	0.390512	0	0	2.71368	3.14421	SELENOS	0.0204082	0.503197
GO_Biological_Process_2021	secondary alcohol metabolic process	1/49	0.313909	0.390512	0	0	2.71368	3.14421	APOE	0.0204082	0.503197
GO_Biological_Process_2021	mitotic cytokinesis	1/49	0.313909	0.390512	0	0	2.71368	3.14421	SEPTIN6	0.0204082	0.503197
Reactome_2016	G alpha (q) signalling events	3/191	0.180296	0.391127	0	0	2.09138	3.58286	PTGFR;RGS2;GCG	0.0157068	0.744014
Reactome_2016	Downregulation of TGF-beta receptor signaling	1/26	0.181097	0.391127	0	0	5.21632	8.91324	BAMBI	0.0384615	0.742089
Reactome_2016	N-glycan antennae elongation in the medial/trans-Golgi	1/26	0.181097	0.391127	0	0	5.21632	8.91324	MGAT4C	0.0384615	0.742089
GO_Biological_Process_2021	regulation of G2/M transition of mitotic cell cycle	2/149	0.315906	0.39249	0	0	1.77501	2.04537	CDC25C;TUBA4A	0.0134228	0.500442
GO_Biological_Process_2021	positive regulation of protein phosphorylation	4/371	0.316056	0.39249	0	0	1.42494	1.6413	PRNP;BMP3;SLCO3A1;MT3	0.0107817	0.500235
GO_Biological_Process_2021	neutrophil mediated immunity	5/488	0.318325	0.394269	0	0	1.35443	1.55039	NFASC;FABP5;AHSG;CTSZ;HBB	0.0102459	0.497129
GO_Biological_Process_2021	cellular response to organic cyclic compound	2/150	0.318716	0.394269	0	0	1.76293	2.01583	INSIG1;SSTR1	0.0133333	0.496596
GO_Biological_Process_2021	neuron migration	1/50	0.31917	0.394269	0	0	2.65816	3.03571	MAP1B	0.02	0.495978
GO_Biological_Process_2021	organic hydroxy compound biosynthetic process	1/50	0.31917	0.394269	0	0	2.65816	3.03571	INSIG1	0.02	0.495978
GO_Biological_Process_2021	positive regulation of cell morphogenesis involved in differentiation	1/50	0.31917	0.394269	0	0	2.65816	3.03571	FLNA	0.02	0.495978
GO_Biological_Process_2021	positive regulation of ion transport	1/50	0.31917	0.394269	0	0	2.65816	3.03571	RAB3B	0.02	0.495978
Reactome_2016	CREB phosphorylation through the activation of Ras	1/27	0.18737	0.395318	0	0	5.01544	8.39921	CAMK2B	0.037037	0.727301
Reactome_2016	VEGFR2 mediated vascular permeability	1/27	0.18737	0.395318	0	0	5.01544	8.39921	PAK3	0.037037	0.727301
Reactome_2016	Interleukin-6 family signaling	1/27	0.18737	0.395318	0	0	5.01544	8.39921	LIFR	0.037037	0.727301
Reactome_2016	Prefoldin mediated transfer of substrate to CCT/TriC	1/27	0.18737	0.395318	0	0	5.01544	8.39921	TUBA4A	0.037037	0.727301
GO_Biological_Process_2021	negative regulation of protein phosphorylation	2/152	0.324328	0.398619	0	0	1.73925	1.95839	PRNP;MLXIPL	0.0131579	0.489015
GO_Biological_Process_2021	actin filament organization	2/152	0.324328	0.398619	0	0	1.73925	1.95839	DPYSL3;FLNA	0.0131579	0.489015
GO_Biological_Process_2021	sensory perception	1/51	0.324391	0.398619	0	0	2.60487	2.93257	SCN9A	0.0196078	0.488931
GO_Biological_Process_2021	regulation of substrate adhesion-dependent cell spreading	1/51	0.324391	0.398619	0	0	2.60487	2.93257	FLNA	0.0196078	0.488931
GO_Biological_Process_2021	cholesterol transport	1/51	0.324391	0.398619	0	0	2.60487	2.93257	APOE	0.0196078	0.488931
GO_Biological_Process_2021	gonad development	1/51	0.324391	0.398619	0	0	2.60487	2.93257	GATA4	0.0196078	0.488931
Reactome_2016	Signaling by GPCR	13/1293	0.190845	0.400337	0	0	1.34694	2.23092	CAMK2B;PTGFR;DUSP1;CXCR4;GCG;SSTR1;GNAO1;RGS2;GAL;GRM4;GRM7;PRLHR;RGS6	0.0100541	0.719318
Reactome_2016	G-protein activation	1/28	0.193595	0.401489	0	0	4.82943	7.92988	GNAO1	0.0357143	0.713106
Reactome_2016	PERK regulates gene expression	1/28	0.193595	0.401489	0	0	4.82943	7.92988	ASNS	0.0357143	0.713106
GO_Biological_Process_2021	positive regulation of Wnt signaling pathway	2/153	0.32713	0.401633	0	0	1.72764	1.93047	BAMBI;GPC5	0.0130719	0.48528
GO_Biological_Process_2021	positive regulation of protein localization to plasma membrane	1/52	0.329573	0.401828	0	0	2.55366	2.83446	ZDHHC2	0.0192308	0.482048
GO_Biological_Process_2021	ameboidal-type cell migration	1/52	0.329573	0.401828	0	0	2.55366	2.83446	ITGA4	0.0192308	0.482048
GO_Biological_Process_2021	negative regulation of BMP signaling pathway	1/52	0.329573	0.401828	0	0	2.55366	2.83446	BAMBI	0.0192308	0.482048
GO_Biological_Process_2021	sprouting angiogenesis	1/52	0.329573	0.401828	0	0	2.55366	2.83446	EGR3	0.0192308	0.482048
GO_Biological_Process_2021	glycolipid metabolic process	1/52	0.329573	0.401828	0	0	2.55366	2.83446	PGAP1	0.0192308	0.482048
GO_Biological_Process_2021	regulation of intrinsic apoptotic signaling pathway	1/52	0.329573	0.401828	0	0	2.55366	2.83446	NUPR1	0.0192308	0.482048
GO_Biological_Process_2021	endocytic recycling	1/52	0.329573	0.401828	0	0	2.55366	2.83446	ANKRD50	0.0192308	0.482048
GO_Biological_Process_2021	positive regulation of developmental growth	1/52	0.329573	0.401828	0	0	2.55366	2.83446	RIMS2	0.0192308	0.482048
GO_Biological_Process_2021	positive regulation of phagocytosis	1/53	0.334715	0.406611	0	0	2.50443	2.74103	AHSG	0.0188679	0.475325
GO_Biological_Process_2021	cardiac muscle tissue development	1/53	0.334715	0.406611	0	0	2.50443	2.74103	GATA4	0.0188679	0.475325
GO_Biological_Process_2021	positive regulation of chemokine production	1/53	0.334715	0.406611	0	0	2.50443	2.74103	CHIA	0.0188679	0.475325
GO_Biological_Process_2021	regulation of DNA replication	1/53	0.334715	0.406611	0	0	2.50443	2.74103	CCDC88A	0.0188679	0.475325
GO_Biological_Process_2021	protein-containing complex assembly	3/267	0.334941	0.406611	0	0	1.48356	1.62272	TCF7;CTSZ;TGFA	0.011236	0.475032
GO_Biological_Process_2021	regulation of cell differentiation	2/156	0.335516	0.406958	0	0	1.69373	1.8497	ID2;SERPINF2	0.0128205	0.474287
Reactome_2016	Neuronal System	4/301	0.199546	0.407357	0	0	1.76711	2.84807	CAMK2B;KCNJ8;KCNJ11;GRIK1	0.013289	0.699957
Reactome_2016	Surfactant metabolism	1/29	0.199772	0.407357	0	0	4.65672	7.5	ZDHHC2	0.0344828	0.699465
Reactome_2016	YAP1- and WWTR1 (TAZ)-stimulated gene expression	1/29	0.199772	0.407357	0	0	4.65672	7.5	GATA4	0.0344828	0.699465
GO_Biological_Process_2021	positive regulation of macromolecule metabolic process	4/384	0.338575	0.410314	0	0	1.37527	1.48944	RIMS2;ID2;PAX6;MT3	0.0104167	0.470346
GO_Biological_Process_2021	unsaturated fatty acid metabolic process	1/54	0.339818	0.410407	0	0	2.45705	2.652	FAAH	0.0185185	0.468753
GO_Biological_Process_2021	regulation of proteolysis	1/54	0.339818	0.410407	0	0	2.45705	2.652	SERPINE2	0.0185185	0.468753
GO_Biological_Process_2021	regulation of potassium ion transmembrane transport	1/54	0.339818	0.410407	0	0	2.45705	2.652	FLNA	0.0185185	0.468753
GO_Biological_Process_2021	cytoplasmic microtubule organization	1/54	0.339818	0.410407	0	0	2.45705	2.652	CCDC88A	0.0185185	0.468753
GO_Biological_Process_2021	cellular response to growth factor stimulus	2/158	0.34109	0.411237	0	0	1.67185	1.79825	EGR3;SOX5	0.0126582	0.467131
GO_Biological_Process_2021	organonitrogen compound biosynthetic process	2/158	0.34109	0.411237	0	0	1.67185	1.79825	ELOVL6;APOE	0.0126582	0.467131
GO_Biological_Process_2021	regulation of cardiac conduction	1/55	0.344882	0.414743	0	0	2.41143	2.56709	KCNJ11	0.0181818	0.462329
GO_Biological_Process_2021	regulation of blood vessel endothelial cell migration	1/55	0.344882	0.414743	0	0	2.41143	2.56709	APOE	0.0181818	0.462329
GO_Biological_Process_2021	pyruvate metabolic process	1/55	0.344882	0.414743	0	0	2.41143	2.56709	PKLR	0.0181818	0.462329
Reactome_2016	Glucagon-type ligand receptors	1/30	0.205903	0.415056	0	0	4.49592	7.10512	GCG	0.0333333	0.686337
Reactome_2016	Activation of Kainate Receptors upon glutamate binding	1/30	0.205903	0.415056	0	0	4.49592	7.10512	GRIK1	0.0333333	0.686337
Reactome_2016	Post-translational protein modification	6/521	0.209895	0.415056	0	0	1.53216	2.39193	MGAT4C;PGAP1;ADAMTS19;CTSZ;TGFA;ST6GALNAC5	0.0115163	0.677999
Reactome_2016	Glutamate Binding, Activation of AMPA Receptors and Synaptic Plasticity	1/31	0.211987	0.415056	0	0	4.34583	6.74139	CAMK2B	0.0322581	0.673691
Reactome_2016	Adherens junctions interactions	1/31	0.211987	0.415056	0	0	4.34583	6.74139	CDH17	0.0322581	0.673691
Reactome_2016	Trafficking of AMPA receptors	1/31	0.211987	0.415056	0	0	4.34583	6.74139	CAMK2B	0.0322581	0.673691
Reactome_2016	PPARA activates gene expression	2/113	0.214196	0.415056	0	0	2.35499	3.62872	FABP1;HMGCS1	0.0176991	0.669188
Reactome_2016	TGF-beta receptor signaling activates SMADs	1/32	0.218025	0.415056	0	0	4.20543	6.40549	BAMBI	0.03125	0.661495
Reactome_2016	Glycolysis	1/32	0.218025	0.415056	0	0	4.20543	6.40549	PKLR	0.03125	0.661495
Reactome_2016	Signaling by Robo receptor	1/32	0.218025	0.415056	0	0	4.20543	6.40549	PAK3	0.03125	0.661495
Reactome_2016	Cooperation of Prefoldin and TriC/CCT in actin and tubulin folding	1/32	0.218025	0.415056	0	0	4.20543	6.40549	TUBA4A	0.03125	0.661495
Reactome_2016	SMAD2/SMAD3:SMAD4 heterotrimer regulates transcription	1/32	0.218025	0.415056	0	0	4.20543	6.40549	JUNB	0.03125	0.661495
Reactome_2016	Regulation of lipid metabolism by Peroxisome proliferator-activated receptor alpha (PPARalpha)	2/116	0.22262	0.415056	0	0	2.29267	3.44425	FABP1;HMGCS1	0.0172414	0.652436
Reactome_2016	Glucagon signaling in metabolic regulation	1/33	0.224016	0.415056	0	0	4.07381	6.09457	GCG	0.030303	0.64972
Reactome_2016	CD28 co-stimulation	1/33	0.224016	0.415056	0	0	4.07381	6.09457	PAK3	0.030303	0.64972
Reactome_2016	Detoxification of Reactive Oxygen Species	1/33	0.224016	0.415056	0	0	4.07381	6.09457	GPX8	0.030303	0.64972
Reactome_2016	Smooth Muscle Contraction	1/33	0.224016	0.415056	0	0	4.07381	6.09457	ITGA1	0.030303	0.64972
Reactome_2016	Sialic acid metabolism	1/33	0.224016	0.415056	0	0	4.07381	6.09457	ST6GALNAC5	0.030303	0.64972
GO_Biological_Process_2021	sensory organ development	1/56	0.349908	0.41971	0	0	2.36746	2.48604	PAX6	0.0178571	0.456047
GO_Biological_Process_2021	DNA damage response, signal transduction by p53 class mediator resulting in cell cycle arrest	1/56	0.349908	0.41971	0	0	2.36746	2.48604	CDC25C	0.0178571	0.456047
GO_Biological_Process_2021	blood vessel morphogenesis	1/56	0.349908	0.41971	0	0	2.36746	2.48604	SERPINF2	0.0178571	0.456047
Reactome_2016	Lipoprotein metabolism	1/34	0.229962	0.42179	0	0	3.95016	5.8061	APOE	0.0294118	0.638343
Reactome_2016	HSF1-dependent transactivation	1/34	0.229962	0.42179	0	0	3.95016	5.8061	CAMK2B	0.0294118	0.638343
Reactome_2016	Fatty acid, triacylglycerol, and ketone body metabolism	3/217	0.231422	0.422346	0	0	1.83486	2.68534	FABP1;HMGCS1;ELOVL6	0.0138249	0.635594
Reactome_2016	Generation of second messenger molecules	1/35	0.235863	0.422927	0	0	3.83378	5.53792	PAK3	0.0285714	0.62734
Reactome_2016	Post NMDA receptor activation events	1/35	0.235863	0.422927	0	0	3.83378	5.53792	CAMK2B	0.0285714	0.62734
Reactome_2016	Lysosome Vesicle Biogenesis	1/35	0.235863	0.422927	0	0	3.83378	5.53792	CTSZ	0.0285714	0.62734
Reactome_2016	Gastrin-CREB signalling pathway via PKC and MAPK	5/432	0.236376	0.422927	0	0	1.53649	2.21613	CAMK2B;PTGFR;RGS2;DUSP1;GCG	0.0115741	0.626397
GO_Biological_Process_2021	positive regulation of proteolysis	1/57	0.354895	0.423167	0	0	2.32507	2.40862	APOE	0.0175439	0.4499
GO_Biological_Process_2021	negative regulation of DNA recombination	1/57	0.354895	0.423167	0	0	2.32507	2.40862	H1-3	0.0175439	0.4499
GO_Biological_Process_2021	arachidonic acid metabolic process	1/57	0.354895	0.423167	0	0	2.32507	2.40862	FAAH	0.0175439	0.4499
GO_Biological_Process_2021	regulation of bone mineralization	1/57	0.354895	0.423167	0	0	2.32507	2.40862	AHSG	0.0175439	0.4499
GO_Biological_Process_2021	regulation of reactive oxygen species metabolic process	1/57	0.354895	0.423167	0	0	2.32507	2.40862	MT3	0.0175439	0.4499
GO_Biological_Process_2021	positive regulation of gene expression, epigenetic	1/57	0.354895	0.423167	0	0	2.32507	2.40862	H1-3	0.0175439	0.4499
GO_Biological_Process_2021	monocarboxylic acid transport	1/57	0.354895	0.423167	0	0	2.32507	2.40862	SLCO3A1	0.0175439	0.4499
GO_Biological_Process_2021	heart development	2/164	0.357723	0.425463	0	0	1.60944	1.65449	ID2;GATA4	0.0121951	0.446453
GO_Biological_Process_2021	membrane lipid biosynthetic process	1/58	0.359844	0.425463	0	0	2.28416	2.33461	ELOVL6	0.0172414	0.443886
GO_Biological_Process_2021	regulation of neurotransmitter receptor activity	1/58	0.359844	0.425463	0	0	2.28416	2.33461	CAMK2B	0.0172414	0.443886
GO_Biological_Process_2021	regulation of calcium ion transport	1/58	0.359844	0.425463	0	0	2.28416	2.33461	CAMK2B	0.0172414	0.443886
GO_Biological_Process_2021	regulation of pathway-restricted SMAD protein phosphorylation	1/58	0.359844	0.425463	0	0	2.28416	2.33461	BMP3	0.0172414	0.443886
GO_Biological_Process_2021	regulation of phagocytosis	1/58	0.359844	0.425463	0	0	2.28416	2.33461	AHSG	0.0172414	0.443886
GO_Biological_Process_2021	eye development	1/58	0.359844	0.425463	0	0	2.28416	2.33461	PAX6	0.0172414	0.443886
GO_Biological_Process_2021	fat cell differentiation	1/58	0.359844	0.425463	0	0	2.28416	2.33461	CEBPA	0.0172414	0.443886
GO_Biological_Process_2021	positive regulation of mitotic cell cycle phase transition	1/58	0.359844	0.425463	0	0	2.28416	2.33461	CDC25C	0.0172414	0.443886
GO_Biological_Process_2021	negative regulation of hydrolase activity	1/58	0.359844	0.425463	0	0	2.28416	2.33461	MAP2	0.0172414	0.443886
GO_Biological_Process_2021	negative regulation of canonical Wnt signaling pathway	2/165	0.360482	0.425859	0	0	1.59948	1.63197	FRZB;APOE	0.0121212	0.443117
GO_Biological_Process_2021	phospholipid transport	1/59	0.364755	0.430546	0	0	2.24467	2.26381	APOE	0.0169492	0.437998
GO_Biological_Process_2021	cellular response to chemokine	1/60	0.369629	0.435204	0	0	2.20651	2.19604	DUSP1	0.0166667	0.432233
GO_Biological_Process_2021	cellular protein catabolic process	1/60	0.369629	0.435204	0	0	2.20651	2.19604	CTSZ	0.0166667	0.432233
GO_Biological_Process_2021	homophilic cell adhesion via plasma membrane adhesion molecules	1/60	0.369629	0.435204	0	0	2.20651	2.19604	CDH17	0.0166667	0.432233
Reactome_2016	Activation of ATR in response to replication stress	1/37	0.24753	0.438585	0	0	3.62043	5.05493	CDC25C	0.027027	0.606372
Reactome_2016	Defective B3GALTL causes Peters-plus syndrome (PpS)	1/37	0.24753	0.438585	0	0	3.62043	5.05493	ADAMTS19	0.027027	0.606372
GO_Biological_Process_2021	transmembrane receptor protein tyrosine kinase signaling pathway	4/404	0.373317	0.439178	0	0	1.30517	1.28602	GRB10;PAK3;ROS1;ANKS1B	0.00990099	0.427923
GO_Biological_Process_2021	B cell differentiation	1/61	0.374466	0.439428	0	0	2.16963	2.13112	ITGA4	0.0163934	0.426587
GO_Biological_Process_2021	regulation of endocytosis	1/61	0.374466	0.439428	0	0	2.16963	2.13112	APOE	0.0163934	0.426587
GO_Biological_Process_2021	protein lipidation	1/61	0.374466	0.439428	0	0	2.16963	2.13112	ZDHHC2	0.0163934	0.426587
Reactome_2016	Glutathione conjugation	1/38	0.253297	0.442361	0	0	3.5224	4.83693	CHAC2	0.0263158	0.596369
Reactome_2016	Transport of vitamins, nucleosides, and related molecules	1/38	0.253297	0.442361	0	0	3.5224	4.83693	SLCO3A1	0.0263158	0.596369
Reactome_2016	O-glycosylation of TSR domain-containing proteins	1/38	0.253297	0.442361	0	0	3.5224	4.83693	ADAMTS19	0.0263158	0.596369
GO_Biological_Process_2021	regulation of neurogenesis	1/62	0.379266	0.44469	0	0	2.13395	2.0689	PAX6	0.016129	0.421056
Reactome_2016	Association of TriC/CCT with target proteins during biosynthesis	1/39	0.259021	0.445955	0	0	3.42954	4.63278	FBXW4	0.025641	0.586666
Reactome_2016	Activation of NMDA receptor upon glutamate binding and postsynaptic events	1/39	0.259021	0.445955	0	0	3.42954	4.63278	CAMK2B	0.025641	0.586666
Reactome_2016	Formation of Fibrin Clot (Clotting Cascade)	1/39	0.259021	0.445955	0	0	3.42954	4.63278	SERPINE2	0.025641	0.586666
GO_Biological_Process_2021	actin cytoskeleton reorganization	1/63	0.38403	0.448406	0	0	2.09943	2.00923	FLNA	0.015873	0.415635
GO_Biological_Process_2021	anterior/posterior pattern specification	1/63	0.38403	0.448406	0	0	2.09943	2.00923	GATA4	0.015873	0.415635
GO_Biological_Process_2021	cellular response to reactive oxygen species	1/63	0.38403	0.448406	0	0	2.09943	2.00923	FABP1	0.015873	0.415635
GO_Biological_Process_2021	positive regulation of DNA metabolic process	1/63	0.38403	0.448406	0	0	2.09943	2.00923	TOX	0.015873	0.415635
GO_Biological_Process_2021	monocarboxylic acid biosynthetic process	1/63	0.38403	0.448406	0	0	2.09943	2.00923	GATM	0.015873	0.415635
GO_Biological_Process_2021	neuron differentiation	2/174	0.385099	0.449282	0	0	1.51509	1.44579	ID2;PAX6	0.0114943	0.414428
Reactome_2016	Negative regulation of MAPK pathway	1/40	0.2647	0.449926	0	0	3.34143	4.44129	DUSP1	0.025	0.577246
Reactome_2016	Cell-Cell communication	2/131	0.265025	0.449926	0	0	2.02454	2.68845	FLNA;CDH17	0.0152672	0.576714
Reactome_2016	ER to Golgi Anterograde Transport	2/131	0.265025	0.449926	0	0	2.02454	2.68845	CTSZ;TGFA	0.0152672	0.576714
GO_Biological_Process_2021	plasma membrane organization	1/64	0.388757	0.45205	0	0	2.066	1.95196	CXCR4	0.015625	0.410322
GO_Biological_Process_2021	negative regulation of intrinsic apoptotic signaling pathway	1/64	0.388757	0.45205	0	0	2.066	1.95196	SELENOS	0.015625	0.410322
GO_Biological_Process_2021	regulation of cilium assembly	1/64	0.388757	0.45205	0	0	2.066	1.95196	CCDC88A	0.015625	0.410322
GO_Biological_Process_2021	protein catabolic process	1/64	0.388757	0.45205	0	0	2.066	1.95196	APOE	0.015625	0.410322
GO_Biological_Process_2021	steroid biosynthetic process	1/65	0.393448	0.455247	0	0	2.03361	1.89697	INSIG1	0.0153846	0.405113
GO_Biological_Process_2021	mitotic G1 DNA damage checkpoint signaling	1/65	0.393448	0.455247	0	0	2.03361	1.89697	CDC25C	0.0153846	0.405113
GO_Biological_Process_2021	G protein-coupled receptor signaling pathway, coupled to cyclic nucleotide second messenger	1/65	0.393448	0.455247	0	0	2.03361	1.89697	SSTR1	0.0153846	0.405113
GO_Biological_Process_2021	chemical homeostasis	1/65	0.393448	0.455247	0	0	2.03361	1.89697	CEBPA	0.0153846	0.405113
GO_Biological_Process_2021	regulation of cellular catabolic process	1/65	0.393448	0.455247	0	0	2.03361	1.89697	NUPR1	0.0153846	0.405113
GO_Biological_Process_2021	BMP signaling pathway	1/65	0.393448	0.455247	0	0	2.03361	1.89697	RGMB	0.0153846	0.405113
GO_Biological_Process_2021	regulation of mitotic cell cycle	2/178	0.395911	0.457721	0	0	1.48036	1.37165	ASNS;CDC25C	0.011236	0.402402
GO_Biological_Process_2021	regulation of protein localization	1/66	0.398103	0.4595	0	0	2.00223	1.84414	MAP2	0.0151515	0.400005
GO_Biological_Process_2021	ERBB signaling pathway	1/66	0.398103	0.4595	0	0	2.00223	1.84414	TGFA	0.0151515	0.400005
Reactome_2016	Deactivation of the beta-catenin transactivating complex	1/42	0.27593	0.459883	0	0	3.17811	4.09217	TCF7	0.0238095	0.559201
Reactome_2016	Glucagon-like Peptide-1 (GLP1) regulates insulin secretion	1/42	0.27593	0.459883	0	0	3.17811	4.09217	GCG	0.0238095	0.559201
Reactome_2016	Signaling by Retinoic Acid	1/42	0.27593	0.459883	0	0	3.17811	4.09217	FABP5	0.0238095	0.559201
Reactome_2016	Fatty Acyl-CoA Biosynthesis	1/42	0.27593	0.459883	0	0	3.17811	4.09217	ELOVL6	0.0238095	0.559201
GO_Biological_Process_2021	positive regulation of cellular biosynthetic process	2/180	0.401285	0.462793	0	0	1.46358	1.33637	MLXIPL;HBB	0.0111111	0.396547
GO_Biological_Process_2021	protein N-linked glycosylation	1/67	0.402723	0.464071	0	0	1.97179	1.79336	MGAT4C	0.0149254	0.394994
KEGG_2021_Human	Glutathione metabolism	2/57	0.0706266	0.464506	0	0	4.76629	12.6323	GPX8;CHAC2	0.0350877	1.15103
GO_Biological_Process_2021	positive regulation of intracellular signal transduction	5/546	0.406259	0.467059	0	0	1.2056	1.08596	GRM4;FLNA;TGFA;NUPR1;RUNDC3A	0.00915751	0.391197
GO_Biological_Process_2021	negative regulation of cytokine production	2/182	0.406636	0.467059	0	0	1.44717	1.30221	PRNP;SELENOS	0.010989	0.390794
GO_Biological_Process_2021	negative regulation of transforming growth factor beta receptor signaling pathway	1/68	0.407307	0.467059	0	0	1.94226	1.74452	BAMBI	0.0147059	0.390078
GO_Biological_Process_2021	regulation of myeloid cell differentiation	1/68	0.407307	0.467059	0	0	1.94226	1.74452	ZBTB16	0.0147059	0.390078
GO_Biological_Process_2021	interferon-gamma-mediated signaling pathway	1/68	0.407307	0.467059	0	0	1.94226	1.74452	CAMK2B	0.0147059	0.390078
GO_Biological_Process_2021	positive regulation of protein localization to nucleus	1/68	0.407307	0.467059	0	0	1.94226	1.74452	FLNA	0.0147059	0.390078
KEGG_2021_Human	Synthesis and degradation of ketone bodies	1/10	0.0739353	0.468257	0	0	14.5015	37.77	HMGCS1	0.1	1.13115
GO_Biological_Process_2021	MAPK cascade	3/303	0.409664	0.469379	0	0	1.30313	1.16294	CAMK2B;TGFA;MT3	0.00990099	0.387572
GO_Biological_Process_2021	positive regulation of MAP kinase activity	1/69	0.411857	0.471124	0	0	1.9136	1.69752	TPD52L1	0.0144928	0.385254
GO_Biological_Process_2021	synapse assembly	1/69	0.411857	0.471124	0	0	1.9136	1.69752	SLITRK6	0.0144928	0.385254
KEGG_2021_Human	Long-term depression	2/60	0.0771899	0.47141	0	0	4.51907	11.5755	GNAO1;PRKG1	0.0333333	1.11244
Reactome_2016	PLC beta mediated events	1/44	0.286989	0.471851	0	0	3.02999	3.78237	GNAO1	0.0227273	0.542135
Reactome_2016	Kinesins	1/44	0.286989	0.471851	0	0	3.02999	3.78237	KIF1A	0.0227273	0.542135
Reactome_2016	Transcriptional activity of SMAD2/SMAD3:SMAD4 heterotrimer	1/44	0.286989	0.471851	0	0	3.02999	3.78237	JUNB	0.0227273	0.542135
KEGG_2021_Human	Human immunodeficiency virus 1 infection	4/212	0.080066	0.472113	0	0	2.53472	6.39992	GNAO1;CXCR4;CDC25C;PAK3	0.0188679	1.09655
GO_Biological_Process_2021	establishment of protein localization to membrane	1/70	0.416372	0.473976	0	0	1.88577	1.65227	ZDHHC2	0.0142857	0.380519
GO_Biological_Process_2021	fatty acid catabolic process	1/70	0.416372	0.473976	0	0	1.88577	1.65227	FAAH	0.0142857	0.380519
GO_Biological_Process_2021	positive regulation of cell-substrate adhesion	1/70	0.416372	0.473976	0	0	1.88577	1.65227	FLNA	0.0142857	0.380519
GO_Biological_Process_2021	kidney development	1/70	0.416372	0.473976	0	0	1.88577	1.65227	ZBTB16	0.0142857	0.380519
GO_Biological_Process_2021	wound healing	1/70	0.416372	0.473976	0	0	1.88577	1.65227	GATA4	0.0142857	0.380519
GO_Biological_Process_2021	defense response to Gram-positive bacterium	1/70	0.416372	0.473976	0	0	1.88577	1.65227	CHGA	0.0142857	0.380519
GO_Biological_Process_2021	cellular response to BMP stimulus	1/71	0.420852	0.475996	0	0	1.85874	1.60869	RGMB	0.0140845	0.375871
GO_Biological_Process_2021	response to metal ion	1/71	0.420852	0.475996	0	0	1.85874	1.60869	MT3	0.0140845	0.375871
GO_Biological_Process_2021	regulation of G1/S transition of mitotic cell cycle	1/71	0.420852	0.475996	0	0	1.85874	1.60869	ID2	0.0140845	0.375871
GO_Biological_Process_2021	fatty acid biosynthetic process	1/71	0.420852	0.475996	0	0	1.85874	1.60869	ELOVL6	0.0140845	0.375871
GO_Biological_Process_2021	positive regulation of cellular protein localization	1/71	0.420852	0.475996	0	0	1.85874	1.60869	CCDC88A	0.0140845	0.375871
GO_Biological_Process_2021	regulation of TOR signaling	1/71	0.420852	0.475996	0	0	1.85874	1.60869	ROS1	0.0140845	0.375871
GO_Biological_Process_2021	gland development	1/71	0.420852	0.475996	0	0	1.85874	1.60869	CEBPA	0.0140845	0.375871
GO_Biological_Process_2021	myeloid leukocyte differentiation	1/71	0.420852	0.475996	0	0	1.85874	1.60869	CEBPA	0.0140845	0.375871
Reactome_2016	ABC-family proteins mediated transport	1/45	0.292456	0.476546	0	0	2.96097	3.64035	KCNJ11	0.0222222	0.53394
Reactome_2016	G-protein mediated events	1/45	0.292456	0.476546	0	0	2.96097	3.64035	GNAO1	0.0222222	0.53394
GO_Biological_Process_2021	regulation of mitotic cell cycle phase transition	2/188	0.422552	0.477535	0	0	1.40006	1.20607	ID2;TUBA4A	0.0106383	0.37412
KEGG_2021_Human	GnRH secretion	2/64	0.086225	0.477692	0	0	4.22666	10.3587	TRPC5;KCNJ11	0.03125	1.06437
KEGG_2021_Human	Regulation of actin cytoskeleton	4/218	0.0865991	0.477692	0	0	2.4629	6.0254	ITGA4;ITGA1;CXCR4;PAK3	0.0183486	1.06249
GO_Biological_Process_2021	positive regulation of neurogenesis	1/72	0.425298	0.479099	0	0	1.83247	1.5667	PLXNA4	0.0138889	0.371306
GO_Biological_Process_2021	cell morphogenesis involved in differentiation	1/72	0.425298	0.479099	0	0	1.83247	1.5667	ITGA4	0.0138889	0.371306
GO_Biological_Process_2021	cytoskeleton-dependent cytokinesis	1/72	0.425298	0.479099	0	0	1.83247	1.5667	SEPTIN6	0.0138889	0.371306
GO_Biological_Process_2021	positive regulation of protein secretion	1/72	0.425298	0.479099	0	0	1.83247	1.5667	GLUD1	0.0138889	0.371306
Reactome_2016	Neurotransmitter Receptor Binding And Downstream Transmission In The Postsynaptic Cell	2/142	0.296173	0.480458	0	0	1.86443	2.26866	CAMK2B;GRIK1	0.0140845	0.528455
Reactome_2016	Scavenging of heme from plasma	1/46	0.297881	0.48109	0	0	2.89503	3.50606	HBB	0.0217391	0.525958
GO_Biological_Process_2021	neurotransmitter transport	1/73	0.429711	0.481372	0	0	1.80693	1.52621	GRM4	0.0136986	0.366824
GO_Biological_Process_2021	insulin receptor signaling pathway	1/73	0.429711	0.481372	0	0	1.80693	1.52621	GRB10	0.0136986	0.366824
GO_Biological_Process_2021	regulation of Rho protein signal transduction	1/73	0.429711	0.481372	0	0	1.80693	1.52621	APOE	0.0136986	0.366824
GO_Biological_Process_2021	endoplasmic reticulum organization	1/73	0.429711	0.481372	0	0	1.80693	1.52621	PRNP	0.0136986	0.366824
GO_Biological_Process_2021	defense response to Gram-negative bacterium	1/73	0.429711	0.481372	0	0	1.80693	1.52621	CHGA	0.0136986	0.366824
GO_Biological_Process_2021	chromatin assembly	1/73	0.429711	0.481372	0	0	1.80693	1.52621	H1-3	0.0136986	0.366824
GO_Biological_Process_2021	regulation of actin filament polymerization	1/73	0.429711	0.481372	0	0	1.80693	1.52621	PAK3	0.0136986	0.366824
GO_Biological_Process_2021	regulation of intracellular signal transduction	4/437	0.430256	0.481599	0	0	1.20365	1.01513	GATA4;ARHGAP26;PAK3;ROS1	0.00915332	0.366274
GO_Biological_Process_2021	mitotic nuclear division	1/74	0.434089	0.484349	0	0	1.78208	1.48716	FLNA	0.0135135	0.362421
GO_Biological_Process_2021	DNA damage response, signal transduction by p53 class mediator	1/74	0.434089	0.484349	0	0	1.78208	1.48716	CDC25C	0.0135135	0.362421
GO_Biological_Process_2021	regulation of cytokine-mediated signaling pathway	1/74	0.434089	0.484349	0	0	1.78208	1.48716	LIFR	0.0135135	0.362421
GO_Biological_Process_2021	proteolysis involved in cellular protein catabolic process	1/74	0.434089	0.484349	0	0	1.78208	1.48716	CTSZ	0.0135135	0.362421
Reactome_2016	Transmembrane transport of small molecules	6/594	0.303092	0.48735	0	0	1.33687	1.59585	CAMK2B;TRPC5;KCNJ11;SLC7A8;SLCO3A1;SLC3A2	0.010101	0.518426
GO_Biological_Process_2021	regulation of programmed cell death	2/194	0.438248	0.488036	0	0	1.35589	1.11857	TOX3;CIDEC	0.0103093	0.35828
GO_Biological_Process_2021	negative regulation of macromolecule metabolic process	2/194	0.438248	0.488036	0	0	1.35589	1.11857	ID2;APOE	0.0103093	0.35828
GO_Biological_Process_2021	integrin-mediated signaling pathway	1/75	0.438435	0.488036	0	0	1.75791	1.44948	CDH17	0.0133333	0.358095
GO_Biological_Process_2021	regulation of BMP signaling pathway	1/76	0.442747	0.491669	0	0	1.73439	1.4131	BAMBI	0.0131579	0.353845
GO_Biological_Process_2021	regulation of epithelial to mesenchymal transition	1/76	0.442747	0.491669	0	0	1.73439	1.4131	BAMBI	0.0131579	0.353845
GO_Biological_Process_2021	actomyosin structure organization	1/76	0.442747	0.491669	0	0	1.73439	1.4131	PGM5	0.0131579	0.353845
Reactome_2016	TP53 Regulates Transcription of Cell Cycle Genes	1/48	0.308607	0.491701	0	0	2.77156	3.25848	CDC25C	0.0208333	0.510595
Reactome_2016	Signaling by Rho GTPases	4/367	0.309153	0.491701	0	0	1.44094	1.69154	FLNA;ARHGAP26;CDC25C;PAK3	0.0108992	0.509826
Reactome_2016	RHO GTPase Effectors	3/255	0.309839	0.491701	0	0	1.55516	1.82218	FLNA;CDC25C;PAK3	0.0117647	0.508864
GO_Biological_Process_2021	proteasome-mediated ubiquitin-dependent protein catabolic process	3/321	0.446153	0.495061	0	0	1.22824	0.991304	FBXW4;SELENOS;SGTB	0.00934579	0.350516
GO_Biological_Process_2021	cellular response to UV	1/77	0.447026	0.495639	0	0	1.71148	1.37798	H2AW	0.012987	0.349667
GO_Biological_Process_2021	negative regulation of apoptotic signaling pathway	1/78	0.451273	0.499953	0	0	1.68917	1.34404	GATA4	0.0128205	0.345561
GO_Biological_Process_2021	positive regulation of proteasomal ubiquitin-dependent protein catabolic process	1/79	0.455487	0.503433	0	0	1.66743	1.31124	CEBPA	0.0126582	0.341524
GO_Biological_Process_2021	positive regulation of ubiquitin-dependent protein catabolic process	1/79	0.455487	0.503433	0	0	1.66743	1.31124	CEBPA	0.0126582	0.341524
GO_Biological_Process_2021	regulation of cellular response to heat	1/79	0.455487	0.503433	0	0	1.66743	1.31124	CAMK2B	0.0126582	0.341524
GO_Biological_Process_2021	negative regulation of cellular response to growth factor stimulus	1/80	0.459669	0.507258	0	0	1.64624	1.27954	BAMBI	0.0125	0.337555
GO_Biological_Process_2021	regulation of protein localization to plasma membrane	1/80	0.459669	0.507258	0	0	1.64624	1.27954	ZDHHC2	0.0125	0.337555
GO_Biological_Process_2021	cellular protein localization	3/329	0.462091	0.509532	0	0	1.19761	0.924545	ARL4D;FLNA;SEPTIN6	0.00911854	0.335272
GO_Biological_Process_2021	negative regulation of protein modification process	1/81	0.463819	0.511036	0	0	1.62558	1.24887	PRNP	0.0123457	0.333652
GO_Biological_Process_2021	cell-cell junction organization	1/82	0.467937	0.51517	0	0	1.60543	1.21919	CDH17	0.0121951	0.329812
GO_Biological_Process_2021	regulation of protein kinase B signaling	2/207	0.471444	0.518453	0	0	1.26907	0.954282	TGFA;GATA4	0.00966184	0.32657
GO_Biological_Process_2021	regulation of osteoblast differentiation	1/83	0.472024	0.518453	0	0	1.58577	1.19047	BAMBI	0.0120482	0.326036
GO_Biological_Process_2021	epidermis development	1/83	0.472024	0.518453	0	0	1.58577	1.19047	FABP5	0.0120482	0.326036
GO_Biological_Process_2021	positive regulation of cytokine production	3/335	0.473916	0.520125	0	0	1.1756	0.877851	CHIA;SERPINF2;GATA4	0.00895522	0.324298
GO_Biological_Process_2021	spindle assembly	1/84	0.47608	0.522093	0	0	1.56658	1.16267	FLNA	0.0119048	0.32232
KEGG_2021_Human	Renal cell carcinoma	2/69	0.097937	0.523351	0	0	3.91025	9.0852	TGFA;PAK3	0.0289855	1.00905
GO_Biological_Process_2021	positive regulation of protein catabolic process	1/85	0.480105	0.525278	0	0	1.54785	1.13574	APOE	0.0117647	0.318664
GO_Biological_Process_2021	regulation of cell cycle G2/M phase transition	1/85	0.480105	0.525278	0	0	1.54785	1.13574	TUBA4A	0.0117647	0.318664
GO_Biological_Process_2021	B cell activation	1/85	0.480105	0.525278	0	0	1.54785	1.13574	ITGA4	0.0117647	0.318664
GO_Biological_Process_2021	regulation of interferon-gamma production	1/86	0.484099	0.529237	0	0	1.52957	1.10965	PRNP	0.0116279	0.315066
Reactome_2016	SLC-mediated transmembrane transport	3/268	0.337033	0.530058	0	0	1.47789	1.60731	SLC7A8;SLCO3A1;SLC3A2	0.011194	0.472328
Reactome_2016	GPCR downstream signaling	9/983	0.338771	0.530058	0	0	1.21105	1.31088	PTGFR;RGS2;GAL;GRM4;GRM7;CXCR4;GCG;SSTR1;RGS6	0.00915565	0.470094
Reactome_2016	Assembly of collagen fibrils and other multimeric structures	1/54	0.339818	0.530058	0	0	2.45705	2.652	COL6A3	0.0185185	0.468753
Reactome_2016	Golgi Associated Vesicle Biogenesis	1/54	0.339818	0.530058	0	0	2.45705	2.652	TPD52L1	0.0185185	0.468753
GO_Biological_Process_2021	calcium ion transmembrane transport	1/87	0.488063	0.532742	0	0	1.5117	1.08436	TRPC5	0.0114943	0.311524
GO_Biological_Process_2021	sodium ion transmembrane transport	1/87	0.488063	0.532742	0	0	1.5117	1.08436	SCN9A	0.0114943	0.311524
GO_Biological_Process_2021	positive regulation of protein modification process	2/214	0.488831	0.533167	0	0	1.22673	0.878017	SLCO3A1;MT3	0.00934579	0.310841
Reactome_2016	Ion transport by P-type ATPases	1/55	0.344882	0.533398	0	0	2.41143	2.56709	CAMK2B	0.0181818	0.462329
Reactome_2016	ECM proteoglycans	1/55	0.344882	0.533398	0	0	2.41143	2.56709	VCAN	0.0181818	0.462329
GO_Biological_Process_2021	sensory perception of mechanical stimulus	1/88	0.491996	0.535789	0	0	1.49425	1.05985	GRM7	0.0113636	0.308038
GO_Biological_Process_2021	negative regulation of binding	1/88	0.491996	0.535789	0	0	1.49425	1.05985	CTSZ	0.0113636	0.308038
GO_Biological_Process_2021	protein import	1/89	0.4959	0.537958	0	0	1.4772	1.03608	APOE	0.011236	0.304606
GO_Biological_Process_2021	transforming growth factor beta receptor signaling pathway	1/89	0.4959	0.537958	0	0	1.4772	1.03608	BAMBI	0.011236	0.304606
GO_Biological_Process_2021	SCF-dependent proteasomal ubiquitin-dependent protein catabolic process	1/89	0.4959	0.537958	0	0	1.4772	1.03608	FBXW4	0.011236	0.304606
GO_Biological_Process_2021	regulation of cation channel activity	1/89	0.4959	0.537958	0	0	1.4772	1.03608	CAMK2B	0.011236	0.304606
GO_Biological_Process_2021	regulation of endothelial cell migration	1/89	0.4959	0.537958	0	0	1.4772	1.03608	APOE	0.011236	0.304606
Reactome_2016	Chemokine receptors bind chemokines	1/56	0.349908	0.538887	0	0	2.36746	2.48604	CXCR4	0.0178571	0.456047
GO_Biological_Process_2021	sodium ion transport	1/90	0.499773	0.541325	0	0	1.46053	1.01302	SCN9A	0.0111111	0.301227
GO_Biological_Process_2021	cellular amino acid catabolic process	1/90	0.499773	0.541325	0	0	1.46053	1.01302	GLUD1	0.0111111	0.301227
KEGG_2021_Human	Phospholipase D signaling pathway	3/148	0.104788	0.542994	0	0	2.71752	6.13021	PTGFR;GRM4;GRM7	0.0202703	0.979687
KEGG_2021_Human	Glioma	2/75	0.112538	0.544637	0	0	3.58777	7.83736	CAMK2B;TGFA	0.0266667	0.948701
KEGG_2021_Human	Oxytocin signaling pathway	3/154	0.114434	0.544637	0	0	2.60874	5.65511	GNAO1;CAMK2B;RGS2	0.0194805	0.941443
KEGG_2021_Human	Non-alcoholic fatty liver disease	3/155	0.116074	0.544637	0	0	2.59145	5.58075	MLXIPL;CEBPA;PKLR	0.0193548	0.935265
KEGG_2021_Human	Nitrogen metabolism	1/17	0.122433	0.544637	0	0	8.15419	17.1254	GLUD1	0.0588235	0.912101
KEGG_2021_Human	Necroptosis	3/159	0.12272	0.544637	0	0	2.52449	5.29599	CAMK2B;GLUD1;H2AW	0.0188679	0.911083
KEGG_2021_Human	Salmonella infection	4/249	0.124216	0.544637	0	0	2.14787	4.47989	TCF7;FLNA;PAK3;TUBA4A	0.0160643	0.905824
GO_Biological_Process_2021	sensory perception of sound	1/91	0.503617	0.54465	0	0	1.44423	0.99065	GRM7	0.010989	0.297899
GO_Biological_Process_2021	positive regulation of supramolecular fiber organization	1/91	0.503617	0.54465	0	0	1.44423	0.99065	APOE	0.010989	0.297899
GO_Biological_Process_2021	positive regulation of gene expression	4/482	0.505486	0.546235	0	0	1.08781	0.742143	RIMS2;ID2;PAX6;MT3	0.00829876	0.296291
GO_Biological_Process_2021	transcription, DNA-templated	2/221	0.505859	0.546235	0	0	1.18709	0.809001	NFE2L3;SOX5	0.00904977	0.29597
GO_Biological_Process_2021	cellular response to fibroblast growth factor stimulus	1/92	0.507432	0.546256	0	0	1.42828	0.968936	EGR3	0.0108696	0.294622
GO_Biological_Process_2021	regulation of peptidyl-tyrosine phosphorylation	1/92	0.507432	0.546256	0	0	1.42828	0.968936	PRNP	0.0108696	0.294622
GO_Biological_Process_2021	positive regulation of cellular component biogenesis	1/92	0.507432	0.546256	0	0	1.42828	0.968936	CHGA	0.0108696	0.294622
GO_Biological_Process_2021	positive regulation of transmembrane receptor protein serine/threonine kinase signaling pathway	1/92	0.507432	0.546256	0	0	1.42828	0.968936	BMP3	0.0108696	0.294622
GO_Biological_Process_2021	regulation of heart contraction	1/93	0.511218	0.549491	0	0	1.41269	0.947856	KCNJ11	0.0107527	0.291394
GO_Biological_Process_2021	visual perception	1/93	0.511218	0.549491	0	0	1.41269	0.947856	PAX6	0.0107527	0.291394
Reactome_2016	Formation of the beta-catenin:TCF transactivating complex	1/58	0.359844	0.551862	0	0	2.28416	2.33461	TCF7	0.0172414	0.443886
GO_Biological_Process_2021	regulation of kinase activity	1/94	0.514974	0.553106	0	0	1.39743	0.927385	ROS1	0.0106383	0.288214
KEGG_2021_Human	Hippo signaling pathway	3/163	0.129503	0.553624	0	0	2.46088	5.03016	ID2;TCF7;AFP	0.0184049	0.887721
KEGG_2021_Human	Wnt signaling pathway	3/166	0.134675	0.554001	0	0	2.41521	4.84223	CAMK2B;BAMBI;TCF7	0.0180723	0.870712
KEGG_2021_Human	Taste transduction	2/86	0.140601	0.554001	0	0	3.11621	6.11347	GRM4;SCN9A	0.0232558	0.852011
KEGG_2021_Human	Colorectal cancer	2/86	0.140601	0.554001	0	0	3.11621	6.11347	TCF7;TGFA	0.0232558	0.852011
KEGG_2021_Human	Gap junction	2/88	0.145855	0.554001	0	0	3.04343	5.85903	PRKG1;TUBA4A	0.0227273	0.836078
KEGG_2021_Human	Hypertrophic cardiomyopathy	2/90	0.15115	0.554001	0	0	2.97396	5.61926	ITGA4;ITGA1	0.0222222	0.820593
KEGG_2021_Human	Arginine biosynthesis	1/22	0.155521	0.554001	0	0	6.21115	11.5588	GLUD1	0.0454545	0.80821
KEGG_2021_Human	Terpenoid backbone biosynthesis	1/22	0.155521	0.554001	0	0	6.21115	11.5588	HMGCS1	0.0454545	0.80821
KEGG_2021_Human	Renin-angiotensin system	1/23	0.161989	0.554001	0	0	5.92853	10.7913	KLK1	0.0434783	0.790516
KEGG_2021_Human	Proximal tubule bicarbonate reclamation	1/23	0.161989	0.554001	0	0	5.92853	10.7913	GLUD1	0.0434783	0.790516
KEGG_2021_Human	Mannose type O-glycan biosynthesis	1/23	0.161989	0.554001	0	0	5.92853	10.7913	B3GAT2	0.0434783	0.790516
GO_Biological_Process_2021	sensory perception of light stimulus	1/95	0.518702	0.556685	0	0	1.38249	0.907501	PAX6	0.0105263	0.285082
KEGG_2021_Human	Dilated cardiomyopathy	2/96	0.16725	0.560781	0	0	2.78329	4.97725	ITGA4;ITGA1	0.0208333	0.776633
KEGG_2021_Human	Alcoholism	3/186	0.170848	0.561827	0	0	2.14907	3.79737	H4C8;GNAO1;H2AW	0.016129	0.76739
Reactome_2016	RHO GTPases activate PKNs	1/60	0.369629	0.56335	0	0	2.20651	2.19604	CDC25C	0.0166667	0.432233
Reactome_2016	MAPK family signaling cascades	3/284	0.370422	0.56335	0	0	1.3926	1.38301	CAMK2B;DUSP1;PAK3	0.0105634	0.431303
GO_Biological_Process_2021	inflammatory response	2/230	0.52721	0.565384	0	0	1.13971	0.729594	PTGFR;CXCR4	0.00869565	0.278017
GO_Biological_Process_2021	protein phosphorylation	4/496	0.528025	0.565828	0	0	1.05609	0.674432	CAMK2B;PAK3;ROS1;PRKG1	0.00806452	0.277345
KEGG_2021_Human	Hematopoietic cell lineage	2/99	0.175409	0.565942	0	0	2.6968	4.69414	ITGA4;ITGA1	0.020202	0.755948
GO_Biological_Process_2021	regulation of autophagy	2/231	0.529544	0.566345	0	0	1.13468	0.721359	NUPR1;MT3	0.00865801	0.276098
GO_Biological_Process_2021	regulation of peptidyl-serine phosphorylation	1/98	0.529716	0.566345	0	0	1.33953	0.851155	MLXIPL	0.0102041	0.275957
GO_Biological_Process_2021	positive regulation of defense response	1/98	0.529716	0.566345	0	0	1.33953	0.851155	CEBPA	0.0102041	0.275957
Reactome_2016	Cell-cell junction organization	1/61	0.374466	0.567138	0	0	2.16963	2.13112	CDH17	0.0163934	0.426587
Reactome_2016	Insulin receptor signalling cascade	3/287	0.376655	0.568096	0	0	1.37768	1.3452	CAMK2B;DUSP1;GRB10	0.010453	0.424056
Reactome_2016	Diseases associated with O-glycosylation of proteins	1/62	0.379266	0.56968	0	0	2.13395	2.0689	ADAMTS19	0.016129	0.421056
Reactome_2016	G2/M Transition	2/173	0.382383	0.5698	0	0	1.52403	1.4651	CDC25C;TUBA4A	0.0115607	0.417501
Reactome_2016	Collagen biosynthesis and modifying enzymes	1/63	0.38403	0.5698	0	0	2.09943	2.00923	COL6A3	0.015873	0.415635
Reactome_2016	Synthesis of substrates in N-glycan biosythesis	1/63	0.38403	0.5698	0	0	2.09943	2.00923	ST6GALNAC5	0.015873	0.415635
KEGG_2021_Human	Glycosylphosphatidylinositol (GPI)-anchor biosynthesis	1/26	0.181097	0.572147	0	0	5.21632	8.91324	PGAP1	0.0384615	0.742089
KEGG_2021_Human	Fatty acid elongation	1/27	0.18737	0.572147	0	0	5.01544	8.39921	ELOVL6	0.037037	0.727301
KEGG_2021_Human	Biosynthesis of unsaturated fatty acids	1/27	0.18737	0.572147	0	0	5.01544	8.39921	ELOVL6	0.037037	0.727301
Reactome_2016	Mitotic G2-G2/M phases	2/175	0.38781	0.572162	0	0	1.50626	1.42679	CDC25C;TUBA4A	0.0114286	0.411381
Reactome_2016	Hedgehog ligand biogenesis	1/64	0.388757	0.572162	0	0	2.066	1.95196	GPC5	0.015625	0.410322
GO_Biological_Process_2021	regulation of transforming growth factor beta receptor signaling pathway	1/100	0.536919	0.573611	0	0	1.31233	0.81615	BAMBI	0.01	0.270091
GO_Biological_Process_2021	positive regulation of protein localization to membrane	1/101	0.54048	0.576102	0	0	1.29914	0.799362	PRNP	0.00990099	0.267221
GO_Biological_Process_2021	positive regulation of cell cycle process	1/101	0.54048	0.576102	0	0	1.29914	0.799362	TGFA	0.00990099	0.267221
GO_Biological_Process_2021	epithelial cell differentiation	1/101	0.54048	0.576102	0	0	1.29914	0.799362	UPK3A	0.00990099	0.267221
Reactome_2016	Signaling by Wnt	3/295	0.393215	0.576399	0	0	1.33938	1.25018	GNAO1;TCF7;PRKG1	0.0101695	0.40537
GO_Biological_Process_2021	positive regulation of vasculature development	1/102	0.544013	0.578553	0	0	1.28622	0.783026	GATA4	0.00980392	0.264391
GO_Biological_Process_2021	regulation of proteasomal ubiquitin-dependent protein catabolic process	1/102	0.544013	0.578553	0	0	1.28622	0.783026	CEBPA	0.00980392	0.264391
GO_Biological_Process_2021	positive regulation of cell growth	1/102	0.544013	0.578553	0	0	1.28622	0.783026	RIMS2	0.00980392	0.264391
KEGG_2021_Human	Butanoate metabolism	1/28	0.193595	0.580784	0	0	4.82943	7.92988	HMGCS1	0.0357143	0.713106
Reactome_2016	Triglyceride Biosynthesis	1/66	0.398103	0.58123	0	0	2.00223	1.84414	ELOVL6	0.0151515	0.400005
GO_Biological_Process_2021	protein targeting to ER	1/103	0.547519	0.581842	0	0	1.27354	0.767129	SGTB	0.00970874	0.261601
KEGG_2021_Human	Glucagon signaling pathway	2/107	0.197451	0.58214	0	0	2.49032	4.03996	CAMK2B;GCG	0.0186916	0.70454
Reactome_2016	Membrane Trafficking	4/420	0.401035	0.583178	0	0	1.25394	1.14573	CTSZ;TGFA;KIF1A;TPD52L1	0.00952381	0.396818
GO_Biological_Process_2021	cellular metal ion homeostasis	1/104	0.550998	0.585098	0	0	1.26111	0.751653	MT3	0.00961538	0.25885
GO_Biological_Process_2021	membrane organization	2/242	0.554701	0.588585	0	0	1.08206	0.637689	CCDC88A;TGFA	0.00826446	0.255941
GO_Biological_Process_2021	regulation of cell cycle process	1/106	0.557878	0.59062	0	0	1.23697	0.721914	CDC25C	0.00943396	0.253461
GO_Biological_Process_2021	protein processing	1/106	0.557878	0.59062	0	0	1.23697	0.721914	KLK1	0.00943396	0.253461
GO_Biological_Process_2021	positive regulation of protein serine/threonine kinase activity	1/106	0.557878	0.59062	0	0	1.23697	0.721914	TPD52L1	0.00943396	0.253461
Reactome_2016	Loss of proteins required for interphase microtubule organization?from the centrosome	1/69	0.411857	0.594181	0	0	1.9136	1.69752	TUBA4A	0.0144928	0.385254
Reactome_2016	Loss of Nlp from mitotic centrosomes	1/69	0.411857	0.594181	0	0	1.9136	1.69752	TUBA4A	0.0144928	0.385254
GO_Biological_Process_2021	negative regulation of transmembrane receptor protein serine/threonine kinase signaling pathway	1/108	0.564652	0.597343	0	0	1.21372	0.693698	BAMBI	0.00925926	0.248219
KEGG_2021_Human	Serotonergic synapse	2/113	0.214196	0.598681	0	0	2.35499	3.62872	GNAO1;DUSP1	0.0176991	0.669188
KEGG_2021_Human	Cholinergic synapse	2/113	0.214196	0.598681	0	0	2.35499	3.62872	GNAO1;CAMK2B	0.0176991	0.669188
KEGG_2021_Human	Leukocyte transendothelial migration	2/114	0.217001	0.598681	0	0	2.33385	3.56577	ITGA4;CXCR4	0.0175439	0.663538
KEGG_2021_Human	Pathways in cancer	6/531	0.222037	0.598681	0	0	1.5022	2.26067	CAMK2B;CEBPA;ZBTB16;TCF7;TGFA;CXCR4	0.0112994	0.653574
KEGG_2021_Human	Fructose and mannose metabolism	1/33	0.224016	0.598681	0	0	4.07381	6.09457	SORD	0.030303	0.64972
KEGG_2021_Human	cAMP signaling pathway	3/216	0.229405	0.598681	0	0	1.84357	2.71422	CAMK2B;GCG;SSTR1	0.0138889	0.639397
KEGG_2021_Human	Pentose and glucuronate interconversions	1/34	0.229962	0.598681	0	0	3.95016	5.8061	SORD	0.0294118	0.638343
KEGG_2021_Human	Growth hormone synthesis, secretion and action	2/119	0.23107	0.598681	0	0	2.23354	3.27222	SSTR1;JUNB	0.0168067	0.636257
KEGG_2021_Human	Thyroid cancer	1/37	0.24753	0.599759	0	0	3.62043	5.05493	TCF7	0.027027	0.606372
KEGG_2021_Human	African trypanosomiasis	1/37	0.24753	0.599759	0	0	3.62043	5.05493	HBB	0.027027	0.606372
KEGG_2021_Human	Human papillomavirus infection	4/331	0.248064	0.599759	0	0	1.60253	2.23404	ITGA4;TCF7;ITGA1;COL6A3	0.0120846	0.605437
KEGG_2021_Human	Various types of N-glycan biosynthesis	1/39	0.259021	0.599759	0	0	3.42954	4.63278	MGAT4C	0.025641	0.586666
KEGG_2021_Human	Oocyte meiosis	2/129	0.259356	0.599759	0	0	2.05663	2.77553	CAMK2B;CDC25C	0.0155039	0.586103
KEGG_2021_Human	Glycine, serine and threonine metabolism	1/40	0.2647	0.599759	0	0	3.34143	4.44129	GATM	0.025	0.577246
KEGG_2021_Human	Dopaminergic synapse	2/132	0.267859	0.599759	0	0	2.00886	2.64627	GNAO1;CAMK2B	0.0151515	0.572094
KEGG_2021_Human	Bladder cancer	1/41	0.270336	0.599759	0	0	3.25773	4.2614	UPK3A	0.0243902	0.568095
KEGG_2021_Human	Systemic lupus erythematosus	2/135	0.276361	0.599759	0	0	1.96325	2.52484	H4C8;H2AW	0.0148148	0.558523
KEGG_2021_Human	Calcium signaling pathway	3/240	0.278582	0.599759	0	0	1.65485	2.11497	CAMK2B;PTGFR;CXCR4	0.0125	0.555048
KEGG_2021_Human	Fat digestion and absorption	1/43	0.281481	0.599759	0	0	3.10229	3.93274	FABP1	0.0232558	0.550552
KEGG_2021_Human	Estrogen signaling pathway	2/137	0.282027	0.599759	0	0	1.93397	2.44793	GNAO1;TGFA	0.0145985	0.54971
KEGG_2021_Human	PI3K-Akt signaling pathway	4/354	0.286843	0.599759	0	0	1.49546	1.86755	ITGA4;ITGA1;COL6A3;TGFA	0.0112994	0.542355
KEGG_2021_Human	Glycosphingolipid biosynthesis	1/45	0.292456	0.599759	0	0	2.96097	3.64035	ST6GALNAC5	0.0222222	0.53394
KEGG_2021_Human	Apoptosis	2/142	0.296173	0.599759	0	0	1.86443	2.26866	CTSZ;TUBA4A	0.0140845	0.528455
KEGG_2021_Human	Parkinson disease	3/249	0.297309	0.599759	0	0	1.59358	1.93298	CAMK2B;DUSP1;TUBA4A	0.0120482	0.526791
KEGG_2021_Human	Pyruvate metabolism	1/47	0.303264	0.599759	0	0	2.83195	3.37895	PKLR	0.0212766	0.518179
KEGG_2021_Human	Amino sugar and nucleotide sugar metabolism	1/48	0.308607	0.599759	0	0	2.77156	3.25848	CHIA	0.0208333	0.510595
KEGG_2021_Human	Valine, leucine and isoleucine degradation	1/48	0.308607	0.599759	0	0	2.77156	3.25848	HMGCS1	0.0208333	0.510595
KEGG_2021_Human	Retrograde endocannabinoid signaling	2/148	0.313094	0.599759	0	0	1.78726	2.07546	GNAO1;FAAH	0.0135135	0.504326
KEGG_2021_Human	Gastric cancer	2/149	0.315906	0.599759	0	0	1.77501	2.04537	TCF7;CDH17	0.0134228	0.500442
KEGG_2021_Human	N-Glycan biosynthesis	1/50	0.31917	0.599759	0	0	2.65816	3.03571	MGAT4C	0.02	0.495978
KEGG_2021_Human	Malaria	1/50	0.31917	0.599759	0	0	2.65816	3.03571	HBB	0.02	0.495978
KEGG_2021_Human	Cholesterol metabolism	1/50	0.31917	0.599759	0	0	2.65816	3.03571	APOE	0.02	0.495978
KEGG_2021_Human	Arginine and proline metabolism	1/50	0.31917	0.599759	0	0	2.65816	3.03571	GATM	0.02	0.495978
Reactome_2016	Assembly of the primary cilium	2/187	0.419914	0.60342	0	0	1.4077	1.22147	SCLT1;TUBA4A	0.0106952	0.376839
GO_Biological_Process_2021	regulation of interleukin-6 production	1/110	0.571324	0.603493	0	0	1.19133	0.666908	SELENOS	0.00909091	0.243118
GO_Biological_Process_2021	response to endoplasmic reticulum stress	1/110	0.571324	0.603493	0	0	1.19133	0.666908	SELENOS	0.00909091	0.243118
Reactome_2016	AURKA Activation by TPX2	1/72	0.425298	0.60499	0	0	1.83247	1.5667	TUBA4A	0.0138889	0.371306
Reactome_2016	Costimulation by the CD28 family	1/72	0.425298	0.60499	0	0	1.83247	1.5667	PAK3	0.0138889	0.371306
Reactome_2016	Signaling by Insulin receptor	3/311	0.425979	0.60499	0	0	1.26877	1.08272	CAMK2B;DUSP1;GRB10	0.0096463	0.370612
GO_Biological_Process_2021	cellular divalent inorganic cation homeostasis	1/111	0.574621	0.60652	0	0	1.18044	0.654018	MT3	0.00900901	0.240619
KEGG_2021_Human	mTOR signaling pathway	2/154	0.329928	0.608897	0	0	1.71619	1.90305	GRB10;SLC3A2	0.012987	0.48158
KEGG_2021_Human	Cushing syndrome	2/155	0.332724	0.608897	0	0	1.70489	1.87613	CAMK2B;TCF7	0.0129032	0.477916
KEGG_2021_Human	Endocrine and other factor-regulated calcium reabsorption	1/53	0.334715	0.608897	0	0	2.50443	2.74103	KLK1	0.0188679	0.475325
GO_Biological_Process_2021	phosphatidylinositol metabolic process	1/112	0.577893	0.609517	0	0	1.16975	0.64145	PGAP1	0.00892857	0.238152
GO_Biological_Process_2021	negative regulation of cell motility	1/114	0.584363	0.614958	0	0	1.14893	0.617242	DPYSL3	0.00877193	0.233317
GO_Biological_Process_2021	histone modification	1/114	0.584363	0.614958	0	0	1.14893	0.617242	MT3	0.00877193	0.233317
GO_Biological_Process_2021	positive regulation of kinase activity	1/114	0.584363	0.614958	0	0	1.14893	0.617242	ROS1	0.00877193	0.233317
GO_Biological_Process_2021	cellular response to molecule of bacterial origin	1/115	0.587561	0.616479	0	0	1.13879	0.605582	SELENOS	0.00869565	0.230947
GO_Biological_Process_2021	cellular response to lectin	1/115	0.587561	0.616479	0	0	1.13879	0.605582	PAK3	0.00869565	0.230947
GO_Biological_Process_2021	positive regulation of protein metabolic process	1/115	0.587561	0.616479	0	0	1.13879	0.605582	APOE	0.00869565	0.230947
GO_Biological_Process_2021	stimulatory C-type lectin receptor signaling pathway	1/115	0.587561	0.616479	0	0	1.13879	0.605582	PAK3	0.00869565	0.230947
GO_Biological_Process_2021	regulation of protein-containing complex assembly	1/116	0.590734	0.618885	0	0	1.12883	0.594205	APOE	0.00862069	0.228608
GO_Biological_Process_2021	positive regulation of angiogenesis	1/116	0.590734	0.618885	0	0	1.12883	0.594205	GATA4	0.00862069	0.228608
KEGG_2021_Human	Regulation of lipolysis in adipocytes	1/55	0.344882	0.620788	0	0	2.41143	2.56709	PRKG1	0.0181818	0.462329
GO_Biological_Process_2021	cellular component assembly	2/261	0.595891	0.623823	0	0	1.00171	0.518584	DPYSL3;FLNA	0.00766284	0.224833
GO_Biological_Process_2021	adenylate cyclase-activating G protein-coupled receptor signaling pathway	1/118	0.597009	0.624529	0	0	1.10942	0.572268	PTGFR	0.00847458	0.224019
Reactome_2016	VEGFA-VEGFR2 Pathway	3/320	0.444147	0.62501	0	0	1.23218	1.00003	CAMK2B;DUSP1;PAK3	0.009375	0.352473
Reactome_2016	Biological oxidations	2/199	0.451151	0.62501	0	0	1.32114	1.05157	DPEP2;CHAC2	0.0100503	0.345679
Reactome_2016	G2/M DNA damage checkpoint	1/78	0.451273	0.62501	0	0	1.68917	1.34404	CDC25C	0.0128205	0.345561
Reactome_2016	Biosynthesis of the N-glycan precursor (dolichol lipid-linked oligosaccharide, LLO) and transfer to a nascent protein	1/78	0.451273	0.62501	0	0	1.68917	1.34404	ST6GALNAC5	0.0128205	0.345561
Reactome_2016	Signaling by SCF-KIT	3/325	0.454146	0.62501	0	0	1.21273	0.957256	CAMK2B;DUSP1;GRB10	0.00923077	0.342805
Reactome_2016	Glucose metabolism	1/79	0.455487	0.62501	0	0	1.66743	1.31124	PKLR	0.0126582	0.341524
Reactome_2016	Transcriptional regulation of white adipocyte differentiation	1/79	0.455487	0.62501	0	0	1.66743	1.31124	CEBPA	0.0126582	0.341524
Reactome_2016	Centrosome maturation	1/79	0.455487	0.62501	0	0	1.66743	1.31124	TUBA4A	0.0126582	0.341524
Reactome_2016	Recruitment of mitotic centrosome proteins and complexes	1/79	0.455487	0.62501	0	0	1.66743	1.31124	TUBA4A	0.0126582	0.341524
Reactome_2016	Signaling by VEGF	3/328	0.460109	0.627014	0	0	1.20135	0.9326	CAMK2B;DUSP1;PAK3	0.00914634	0.337139
Reactome_2016	Ion channel transport	2/203	0.461352	0.627014	0	0	1.29459	1.00148	CAMK2B;TRPC5	0.00985222	0.335967
Reactome_2016	COPI-dependent Golgi-to-ER retrograde traffic	1/81	0.463819	0.627014	0	0	1.62558	1.24887	KIF1A	0.0123457	0.333652
Reactome_2016	Opioid Signalling	1/81	0.463819	0.627014	0	0	1.62558	1.24887	GNAO1	0.0123457	0.333652
GO_Biological_Process_2021	innate immune response activating cell surface receptor signaling pathway	1/119	0.60011	0.627306	0	0	1.09997	0.56169	PAK3	0.00840336	0.221769
GO_Biological_Process_2021	cellular response to lipopolysaccharide	1/120	0.603187	0.629588	0	0	1.09067	0.551363	SELENOS	0.00833333	0.219548
GO_Biological_Process_2021	cytoskeleton organization	1/120	0.603187	0.629588	0	0	1.09067	0.551363	APOE	0.00833333	0.219548
Reactome_2016	Degradation of beta-catenin by the destruction complex	1/82	0.467937	0.630248	0	0	1.60543	1.21919	TCF7	0.0121951	0.329812
GO_Biological_Process_2021	cellular response to interferon-gamma	1/121	0.606241	0.632306	0	0	1.08152	0.541279	CAMK2B	0.00826446	0.217355
Reactome_2016	Metabolism of amino acids and derivatives	3/335	0.473916	0.634194	0	0	1.1756	0.877851	GLUD1;GATM;ASNS	0.00895522	0.324298
Reactome_2016	Class B/2 (Secretin family receptors)	1/84	0.47608	0.634194	0	0	1.56658	1.16267	GCG	0.0119048	0.32232
Reactome_2016	Metabolism of polyamines	1/84	0.47608	0.634194	0	0	1.56658	1.16267	GATM	0.0119048	0.32232
Reactome_2016	Collagen formation	1/85	0.480105	0.634365	0	0	1.54785	1.13574	COL6A3	0.0117647	0.318664
Reactome_2016	Disease	6/725	0.481049	0.634365	0	0	1.08586	0.794619	VCAN;KCNJ11;ADAMTS19;CXCR4;GPC5;GPC6	0.00827586	0.317811
Reactome_2016	Transmission across Chemical Synapses	2/211	0.481422	0.634365	0	0	1.24453	0.909761	CAMK2B;GRIK1	0.00947867	0.317474
GO_Biological_Process_2021	epithelium development	1/122	0.609272	0.634996	0	0	1.07253	0.53143	UPK3A	0.00819672	0.215189
Reactome_2016	Unfolded Protein Response (UPR)	1/86	0.484099	0.635598	0	0	1.52957	1.10965	ASNS	0.0116279	0.315066
Reactome_2016	Platelet homeostasis	1/87	0.488063	0.636225	0	0	1.5117	1.08436	PRKG1	0.0114943	0.311524
Reactome_2016	Regulation of PLK1 Activity at G2/M Transition	1/87	0.488063	0.636225	0	0	1.5117	1.08436	TUBA4A	0.0114943	0.311524
GO_Biological_Process_2021	defense response to symbiont	1/124	0.615263	0.639819	0	0	1.05499	0.512411	FLNA	0.00806452	0.210939
GO_Biological_Process_2021	regulation of tumor necrosis factor production	1/124	0.615263	0.639819	0	0	1.05499	0.512411	SELENOS	0.00806452	0.210939
GO_Biological_Process_2021	fatty acid metabolic process	1/124	0.615263	0.639819	0	0	1.05499	0.512411	FAAH	0.00806452	0.210939
KEGG_2021_Human	Endometrial cancer	1/58	0.359844	0.640972	0	0	2.28416	2.33461	TCF7	0.0172414	0.443886
Reactome_2016	Activation of anterior HOX genes in hindbrain development during early embryogenesis	1/89	0.4959	0.641856	0	0	1.4772	1.03608	PAX6	0.011236	0.304606
Reactome_2016	Activation of HOX genes during differentiation	1/89	0.4959	0.641856	0	0	1.4772	1.03608	PAX6	0.011236	0.304606
GO_Biological_Process_2021	protein targeting	1/125	0.618225	0.64195	0	0	1.04642	0.503228	ZDHHC2	0.008	0.208853
GO_Biological_Process_2021	regulation of phosphorylation	1/125	0.618225	0.64195	0	0	1.04642	0.503228	CCDC88A	0.008	0.208853
GO_Biological_Process_2021	circulatory system development	1/126	0.621164	0.644526	0	0	1.038	0.494254	ID2	0.00793651	0.206794
KEGG_2021_Human	Hepatocellular carcinoma	2/168	0.368729	0.646805	0	0	1.57033	1.56671	TCF7;TGFA	0.0119048	0.433292
KEGG_2021_Human	Tight junction	2/169	0.37147	0.646805	0	0	1.56085	1.54569	GATA4;TUBA4A	0.0118343	0.430077
KEGG_2021_Human	Arachidonic acid metabolism	1/61	0.374466	0.646805	0	0	2.16963	2.13112	GPX8	0.0163934	0.426587
GO_Biological_Process_2021	organelle organization	3/420	0.626436	0.649517	0	0	0.931894	0.435855	CHGA;APOE;CIDEC	0.00714286	0.203123
Reactome_2016	MAPK6/MAPK4 signaling	1/92	0.507432	0.654462	0	0	1.42828	0.968936	PAK3	0.0108696	0.294622
GO_Biological_Process_2021	protein glycosylation	1/130	0.632697	0.655526	0	0	1.00561	0.460332	MGAT4C	0.00769231	0.198804
KEGG_2021_Human	Basal cell carcinoma	1/63	0.38403	0.655863	0	0	2.09943	2.00923	TCF7	0.015873	0.415635
KEGG_2021_Human	MAPK signaling pathway	3/294	0.391151	0.655863	0	0	1.34405	1.26161	DUSP1;FLNA;TGFA	0.0102041	0.407656
KEGG_2021_Human	Cytokine-cytokine receptor interaction	3/295	0.393215	0.655863	0	0	1.33938	1.25018	BMP3;CXCR4;LIFR	0.0101695	0.40537
KEGG_2021_Human	Aminoacyl-tRNA biosynthesis	1/66	0.398103	0.655863	0	0	2.00223	1.84414	TARS3	0.0151515	0.400005
KEGG_2021_Human	Glycolysis / Gluconeogenesis	1/67	0.402723	0.655863	0	0	1.97179	1.79336	PKLR	0.0149254	0.394994
KEGG_2021_Human	Long-term potentiation	1/67	0.402723	0.655863	0	0	1.97179	1.79336	CAMK2B	0.0149254	0.394994
Reactome_2016	Interferon gamma signaling	1/93	0.511218	0.657023	0	0	1.41269	0.947856	CAMK2B	0.0107527	0.291394
Reactome_2016	EPH-Ephrin signaling	1/95	0.518702	0.662752	0	0	1.38249	0.907501	PAK3	0.0105263	0.285082
Reactome_2016	Cellular response to heat stress	1/96	0.522402	0.662752	0	0	1.36787	0.888181	CAMK2B	0.0104167	0.281995
Reactome_2016	Signaling by PDGF	3/364	0.529303	0.662752	0	0	1.07956	0.686807	CAMK2B;DUSP1;COL6A3	0.00824176	0.276295
Reactome_2016	Stimuli-sensing channels	1/100	0.536919	0.662752	0	0	1.31233	0.81615	TRPC5	0.01	0.270091
Reactome_2016	Phase II conjugation	1/100	0.536919	0.662752	0	0	1.31233	0.81615	CHAC2	0.01	0.270091
Reactome_2016	GRB2 events in EGFR signaling	2/235	0.538801	0.662752	0	0	1.11497	0.689507	CAMK2B;DUSP1	0.00851064	0.268571
Reactome_2016	SHC1 events in EGFR signaling	2/235	0.538801	0.662752	0	0	1.11497	0.689507	CAMK2B;DUSP1	0.00851064	0.268571
Reactome_2016	SOS-mediated signalling	2/235	0.538801	0.662752	0	0	1.11497	0.689507	CAMK2B;DUSP1	0.00851064	0.268571
Reactome_2016	SHC1 events in ERBB4 signaling	2/235	0.538801	0.662752	0	0	1.11497	0.689507	CAMK2B;DUSP1	0.00851064	0.268571
Reactome_2016	RAF/MAP kinase cascade	2/235	0.538801	0.662752	0	0	1.11497	0.689507	CAMK2B;DUSP1	0.00851064	0.268571
Reactome_2016	FRS-mediated FGFR2 signaling	2/236	0.541096	0.662752	0	0	1.11015	0.681807	CAMK2B;DUSP1	0.00847458	0.266725
Reactome_2016	FRS-mediated FGFR1 signaling	2/236	0.541096	0.662752	0	0	1.11015	0.681807	CAMK2B;DUSP1	0.00847458	0.266725
Reactome_2016	FRS-mediated FGFR3 signaling	2/236	0.541096	0.662752	0	0	1.11015	0.681807	CAMK2B;DUSP1	0.00847458	0.266725
Reactome_2016	FRS-mediated FGFR4 signaling	2/236	0.541096	0.662752	0	0	1.11015	0.681807	CAMK2B;DUSP1	0.00847458	0.266725
GO_Biological_Process_2021	defense response to virus	1/133	0.641117	0.663761	0	0	0.982606	0.436811	FLNA	0.0075188	0.193063
KEGG_2021_Human	Amphetamine addiction	1/69	0.411857	0.66441	0	0	1.9136	1.69752	CAMK2B	0.0144928	0.385254
KEGG_2021_Human	Adherens junction	1/71	0.420852	0.664708	0	0	1.85874	1.60869	TCF7	0.0140845	0.375871
KEGG_2021_Human	Neutrophil extracellular trap formation	2/189	0.425183	0.664708	0	0	1.3925	1.19091	H4C8;H2AW	0.010582	0.371424
KEGG_2021_Human	Non-small cell lung cancer	1/72	0.425298	0.664708	0	0	1.83247	1.5667	TGFA	0.0138889	0.371306
KEGG_2021_Human	Thyroid hormone synthesis	1/75	0.438435	0.664708	0	0	1.75791	1.44948	GPX8	0.0133333	0.358095
KEGG_2021_Human	Gastric acid secretion	1/76	0.442747	0.664708	0	0	1.73439	1.4131	CAMK2B	0.0131579	0.353845
KEGG_2021_Human	Pancreatic cancer	1/76	0.442747	0.664708	0	0	1.73439	1.4131	TGFA	0.0131579	0.353845
KEGG_2021_Human	Pathogenic Escherichia coli infection	2/197	0.446009	0.664708	0	0	1.33483	1.07776	PAK3;TUBA4A	0.0101523	0.350656
KEGG_2021_Human	Bacterial invasion of epithelial cells	1/77	0.447026	0.664708	0	0	1.71148	1.37798	SEPTIN6	0.012987	0.349667
KEGG_2021_Human	Leishmaniasis	1/77	0.447026	0.664708	0	0	1.71148	1.37798	ITGA4	0.012987	0.349667
KEGG_2021_Human	Synaptic vesicle cycle	1/78	0.451273	0.665238	0	0	1.68917	1.34404	CPLX2	0.0128205	0.345561
GO_Biological_Process_2021	positive regulation of peptidyl-tyrosine phosphorylation	1/134	0.64388	0.666132	0	0	0.975168	0.42931	PRNP	0.00746269	0.191195
Reactome_2016	ARMS-mediated activation	2/239	0.547934	0.666653	0	0	1.09593	0.659311	CAMK2B;DUSP1	0.0083682	0.261272
Reactome_2016	Signalling to p38 via RIT and RIN	2/239	0.547934	0.666653	0	0	1.09593	0.659311	CAMK2B;DUSP1	0.0083682	0.261272
Reactome_2016	Frs2-mediated activation	2/240	0.550197	0.667183	0	0	1.09127	0.652009	CAMK2B;DUSP1	0.00833333	0.259481
Reactome_2016	MAPK1/MAPK3 signaling	2/241	0.552453	0.6677	0	0	1.08665	0.644802	CAMK2B;DUSP1	0.00829876	0.257705
Reactome_2016	Prolonged ERK activation events	2/242	0.554701	0.668204	0	0	1.08206	0.637689	CAMK2B;DUSP1	0.00826446	0.255941
Reactome_2016	Signaling by Leptin	2/243	0.55694	0.668695	0	0	1.07752	0.630669	CAMK2B;DUSP1	0.00823045	0.254191
Reactome_2016	Interleukin receptor SHC signaling	2/245	0.561396	0.671835	0	0	1.06854	0.6169	CAMK2B;DUSP1	0.00816327	0.250731
Reactome_2016	Signalling to RAS	2/246	0.563612	0.672282	0	0	1.06411	0.610148	CAMK2B;DUSP1	0.00813008	0.24902
GO_Biological_Process_2021	regulation of inflammatory response to antigenic stimulus	1/137	0.652046	0.674084	0	0	0.953512	0.40776	GCG	0.00729927	0.185722
KEGG_2021_Human	Viral carcinogenesis	2/203	0.461352	0.674284	0	0	1.29459	1.00148	H4C8;EGR3	0.00985222	0.335967
Reactome_2016	VEGFR2 mediated cell proliferation	2/248	0.56802	0.674864	0	0	1.05535	0.596904	CAMK2B;DUSP1	0.00806452	0.245637
Reactome_2016	O-linked glycosylation	1/110	0.571324	0.674864	0	0	1.19133	0.666908	ADAMTS19	0.00909091	0.243118
Reactome_2016	Golgi-to-ER retrograde transport	1/110	0.571324	0.674864	0	0	1.19133	0.666908	KIF1A	0.00909091	0.243118
KEGG_2021_Human	Proteoglycans in cancer	2/205	0.466412	0.675902	0	0	1.2817	0.977535	CAMK2B;FLNA	0.0097561	0.33123
Reactome_2016	Interleukin-2 signaling	2/252	0.57674	0.678067	0	0	1.03825	0.571416	CAMK2B;DUSP1	0.00793651	0.23902
Reactome_2016	Signalling to ERKs	2/253	0.5789	0.678067	0	0	1.03406	0.565245	CAMK2B;DUSP1	0.00790514	0.237397
Reactome_2016	Signaling by Interleukins	3/392	0.579608	0.678067	0	0	1.00041	0.545628	CAMK2B;DUSP1;LIFR	0.00765306	0.236866
GO_Biological_Process_2021	protein dephosphorylation	1/139	0.657386	0.679105	0	0	0.939598	0.394147	DUSP1	0.00719424	0.18218
GO_Biological_Process_2021	regulation of small GTPase mediated signal transduction	1/141	0.662644	0.684035	0	0	0.926081	0.381098	ARHGAP26	0.0070922	0.17872
GO_Biological_Process_2021	monocarboxylic acid metabolic process	1/143	0.667822	0.688875	0	0	0.912945	0.368586	GATM	0.00699301	0.175339
KEGG_2021_Human	Complement and coagulation cascades	1/85	0.480105	0.689899	0	0	1.54785	1.13574	SERPINF2	0.0117647	0.318664
GO_Biological_Process_2021	negative regulation of cell migration	1/144	0.670382	0.691009	0	0	0.906515	0.362522	DPYSL3	0.00694444	0.173678
Reactome_2016	Antigen processing: Ubiquitination & Proteasome degradation	2/260	0.593795	0.691772	0	0	1.00565	0.524164	ZBTB16;ASB13	0.00769231	0.226363
Reactome_2016	Interleukin-3, 5 and GM-CSF signaling	2/261	0.595891	0.691772	0	0	1.00171	0.518584	CAMK2B;DUSP1	0.00766284	0.224833
Reactome_2016	TCR signaling	1/118	0.597009	0.691772	0	0	1.10942	0.572268	PAK3	0.00847458	0.224019
GO_Biological_Process_2021	regulation of mRNA stability	1/146	0.675442	0.695715	0	0	0.89392	0.350763	TENT5A	0.00684932	0.170412
GO_Biological_Process_2021	positive regulation of transferase activity	1/148	0.680425	0.700335	0	0	0.881668	0.339475	ROS1	0.00675676	0.16722
KEGG_2021_Human	Pathways of neurodegeneration	4/475	0.494043	0.700817	0	0	1.10438	0.778732	CAMK2B;PRNP;GPX8;TUBA4A	0.00842105	0.306235
KEGG_2021_Human	GABAergic synapse	1/89	0.4959	0.700817	0	0	1.4772	1.03608	GNAO1	0.011236	0.304606
KEGG_2021_Human	Morphine addiction	1/91	0.503617	0.700864	0	0	1.44423	0.99065	GNAO1	0.010989	0.297899
KEGG_2021_Human	Salivary secretion	1/93	0.511218	0.700864	0	0	1.41269	0.947856	PRKG1	0.0107527	0.291394
KEGG_2021_Human	GnRH signaling pathway	1/93	0.511218	0.700864	0	0	1.41269	0.947856	CAMK2B	0.0107527	0.291394
KEGG_2021_Human	Human cytomegalovirus infection	2/225	0.515425	0.700864	0	0	1.16556	0.772493	GNAO1;CXCR4	0.00888889	0.287835
KEGG_2021_Human	Inflammatory mediator regulation of TRP channels	1/98	0.529716	0.700864	0	0	1.33953	0.851155	CAMK2B	0.0102041	0.275957
KEGG_2021_Human	Aldosterone synthesis and secretion	1/98	0.529716	0.700864	0	0	1.33953	0.851155	CAMK2B	0.0102041	0.275957
KEGG_2021_Human	Ras signaling pathway	2/232	0.53187	0.700864	0	0	1.12969	0.713235	TGFA;PAK3	0.00862069	0.274195
KEGG_2021_Human	Thermogenesis	2/232	0.53187	0.700864	0	0	1.12969	0.713235	GCG;PRKG1	0.00862069	0.274195
KEGG_2021_Human	Viral protein interaction with cytokine and cytokine receptor	1/100	0.536919	0.700864	0	0	1.31233	0.81615	CXCR4	0.01	0.270091
KEGG_2021_Human	Progesterone-mediated oocyte maturation	1/100	0.536919	0.700864	0	0	1.31233	0.81615	CDC25C	0.01	0.270091
GO_Biological_Process_2021	positive regulation of hydrolase activity	1/149	0.682888	0.702356	0	0	0.875667	0.334001	RGS6	0.00671141	0.16565
KEGG_2021_Human	Chagas disease	1/102	0.544013	0.70314	0	0	1.28622	0.783026	GNAO1	0.00980392	0.264391
KEGG_2021_Human	C-type lectin receptor signaling pathway	1/104	0.550998	0.70314	0	0	1.26111	0.751653	EGR3	0.00961538	0.25885
KEGG_2021_Human	T cell receptor signaling pathway	1/104	0.550998	0.70314	0	0	1.26111	0.751653	PAK3	0.00961538	0.25885
Reactome_2016	Rho GTPase cycle	1/122	0.609272	0.703747	0	0	1.07253	0.53143	ARHGAP26	0.00819672	0.215189
GO_Biological_Process_2021	brain development	1/150	0.685332	0.704355	0	0	0.869746	0.328635	CXCR4	0.00666667	0.164099
Reactome_2016	C-type lectin receptors (CLRs)	1/123	0.612279	0.70499	0	0	1.06369	0.52181	PAK3	0.00813008	0.213051
KEGG_2021_Human	Insulin resistance	1/108	0.564652	0.710933	0	0	1.21372	0.693698	MLXIPL	0.00925926	0.248219
KEGG_2021_Human	HIF-1 signaling pathway	1/109	0.568001	0.710933	0	0	1.20242	0.680131	CAMK2B	0.00917431	0.245651
KEGG_2021_Human	Endocytosis	2/252	0.57674	0.710933	0	0	1.03825	0.571416	PSD;CXCR4	0.00793651	0.23902
KEGG_2021_Human	Toxoplasmosis	1/112	0.577893	0.710933	0	0	1.16975	0.64145	GNAO1	0.00892857	0.238152
KEGG_2021_Human	TNF signaling pathway	1/112	0.577893	0.710933	0	0	1.16975	0.64145	JUNB	0.00892857	0.238152
GO_Biological_Process_2021	dephosphorylation	1/153	0.692553	0.711257	0	0	0.85245	0.313165	DUSP1	0.00653595	0.159547
GO_Biological_Process_2021	positive regulation of NF-kappaB transcription factor activity	1/155	0.697275	0.715584	0	0	0.841294	0.30335	SLCO3A1	0.00645161	0.156596
GO_Biological_Process_2021	mitotic spindle organization	1/157	0.701925	0.719831	0	0	0.830423	0.293911	FLNA	0.00636943	0.153709
GO_Biological_Process_2021	cellular response to starvation	1/158	0.704223	0.721137	0	0	0.825092	0.289327	ASNS	0.00632911	0.15229
GO_Biological_Process_2021	T cell receptor signaling pathway	1/158	0.704223	0.721137	0	0	0.825092	0.289327	PAK3	0.00632911	0.15229
GO_Biological_Process_2021	transcription by RNA polymerase II	2/320	0.705502	0.721896	0	0	0.813403	0.283752	NFE2L3;SOX5	0.00625	0.151502
GO_Biological_Process_2021	response to lipopolysaccharide	1/159	0.706504	0.721896	0	0	0.819828	0.28483	SELENOS	0.00628931	0.150885
GO_Biological_Process_2021	protein autophosphorylation	1/159	0.706504	0.721896	0	0	0.819828	0.28483	CAMK2B	0.00628931	0.150885
GO_Biological_Process_2021	negative regulation of gene expression	2/322	0.708747	0.723663	0	0	0.808237	0.278241	ID2;APOE	0.00621118	0.149509
GO_Biological_Process_2021	positive regulation of protein kinase B signaling	1/161	0.711013	0.72545	0	0	0.809498	0.276091	TGFA	0.00621118	0.148122
KEGG_2021_Human	Neurotrophin signaling pathway	1/119	0.60011	0.727728	0	0	1.09997	0.56169	CAMK2B	0.00840336	0.221769
KEGG_2021_Human	Thyroid hormone signaling pathway	1/121	0.606241	0.727728	0	0	1.08152	0.541279	GATA4	0.00826446	0.217355
KEGG_2021_Human	Cell cycle	1/124	0.615263	0.727728	0	0	1.05499	0.512411	CDC25C	0.00806452	0.210939
KEGG_2021_Human	Platelet activation	1/124	0.615263	0.727728	0	0	1.05499	0.512411	PRKG1	0.00806452	0.210939
KEGG_2021_Human	Prion disease	2/273	0.620414	0.727728	0	0	0.95677	0.456731	PRNP;TUBA4A	0.00732601	0.207318
KEGG_2021_Human	Osteoclast differentiation	1/127	0.62408	0.727728	0	0	1.02971	0.485483	JUNB	0.00787402	0.204759
KEGG_2021_Human	Lysosome	1/128	0.626975	0.727728	0	0	1.02155	0.47691	CTSZ	0.0078125	0.20275
KEGG_2021_Human	Purine metabolism	1/129	0.629847	0.727728	0	0	1.01352	0.468528	PKLR	0.00775194	0.200765
KEGG_2021_Human	Relaxin signaling pathway	1/129	0.629847	0.727728	0	0	1.01352	0.468528	GNAO1	0.00775194	0.200765
Reactome_2016	IRS-mediated signalling	2/284	0.641881	0.733741	0	0	0.918933	0.407411	CAMK2B;DUSP1	0.00704225	0.192545
Reactome_2016	mRNA Splicing - Major Pathway	1/134	0.64388	0.733741	0	0	0.975168	0.42931	ELAVL2	0.00746269	0.191195
Reactome_2016	Signaling by Hedgehog	1/136	0.649345	0.733741	0	0	0.960624	0.414789	GPC5	0.00735294	0.187525
Reactome_2016	IRS-related events triggered by IGF1R	2/288	0.649449	0.733741	0	0	0.905895	0.391013	CAMK2B;DUSP1	0.00694444	0.187455
Reactome_2016	Signaling by Type 1 Insulin-like Growth Factor 1 Receptor (IGF1R)	2/288	0.649449	0.733741	0	0	0.905895	0.391013	CAMK2B;DUSP1	0.00694444	0.187455
Reactome_2016	IGF1R signaling cascade	2/288	0.649449	0.733741	0	0	0.905895	0.391013	CAMK2B;DUSP1	0.00694444	0.187455
Reactome_2016	FCERI mediated MAPK activation	2/289	0.651321	0.733741	0	0	0.902693	0.387032	CAMK2B;DUSP1	0.00692042	0.186205
KEGG_2021_Human	Vascular smooth muscle contraction	1/133	0.641117	0.735016	0	0	0.982606	0.436811	PRKG1	0.0075188	0.193063
KEGG_2021_Human	Yersinia infection	1/137	0.652046	0.735016	0	0	0.953512	0.40776	ITGA4	0.00729927	0.185722
KEGG_2021_Human	Insulin signaling pathway	1/137	0.652046	0.735016	0	0	0.953512	0.40776	PKLR	0.00729927	0.185722
KEGG_2021_Human	Fluid shear stress and atherosclerosis	1/139	0.657386	0.735016	0	0	0.939598	0.394147	DUSP1	0.00719424	0.18218
KEGG_2021_Human	Olfactory transduction	3/440	0.657645	0.735016	0	0	0.88833	0.372289	CAMK2B;RGS2;PRKG1	0.00681818	0.182008
Reactome_2016	HIV Life Cycle	1/141	0.662644	0.7442	0	0	0.926081	0.381098	CXCR4	0.0070922	0.17872
Reactome_2016	G alpha (s) signalling events	1/142	0.665243	0.744827	0	0	0.919466	0.374777	GCG	0.00704225	0.17702
GO_Biological_Process_2021	positive regulation of I-kappaB kinase/NF-kappaB signaling	1/171	0.732547	0.746879	0	0	0.761494	0.236998	FLNA	0.00584795	0.135165
KEGG_2021_Human	Breast cancer	1/147	0.677943	0.74695	0	0	0.887752	0.345062	TCF7	0.00680272	0.168807
KEGG_2021_Human	Huntington disease	2/306	0.681948	0.74695	0	0	0.851473	0.325945	GPX8;TUBA4A	0.00653595	0.166249
KEGG_2021_Human	Adrenergic signaling in cardiomyocytes	1/150	0.685332	0.74695	0	0	0.869746	0.328635	CAMK2B	0.00666667	0.164099
KEGG_2021_Human	MicroRNAs in cancer	2/310	0.68883	0.74695	0	0	0.840243	0.31321	ZEB1;CDC25C	0.00645161	0.161888
KEGG_2021_Human	Phagosome	1/152	0.690164	0.74695	0	0	0.858139	0.31822	TUBA4A	0.00657895	0.161047
Reactome_2016	mRNA Splicing	1/144	0.670382	0.748286	0	0	0.906515	0.362522	ELAVL2	0.00694444	0.173678
KEGG_2021_Human	Cellular senescence	1/156	0.699609	0.752409	0	0	0.835823	0.298585	GATA4	0.00641026	0.155145
GO_Biological_Process_2021	defense response to bacterium	1/176	0.742708	0.756691	0	0	0.739549	0.219981	CHGA	0.00568182	0.129182
Reactome_2016	Class I MHC mediated antigen processing & presentation	2/305	0.680209	0.756939	0	0	0.854326	0.32922	ZBTB16;ASB13	0.00655738	0.167358
KEGG_2021_Human	JAK-STAT signaling pathway	1/162	0.713242	0.757542	0	0	0.80443	0.271845	LIFR	0.00617284	0.146763
KEGG_2021_Human	Hepatitis B	1/162	0.713242	0.757542	0	0	0.80443	0.271845	EGR3	0.00617284	0.146763
GO_Biological_Process_2021	negative regulation of immune response	1/178	0.746664	0.760171	0	0	0.731118	0.213589	GCG	0.00561798	0.126875
Reactome_2016	G2/M Checkpoints	1/150	0.685332	0.760323	0	0	0.869746	0.328635	CDC25C	0.00666667	0.164099
GO_Biological_Process_2021	regulation of immune response	1/179	0.74862	0.761611	0	0	0.726974	0.210477	ITGA4	0.00558659	0.125739
Reactome_2016	Adaptive Immune System	5/762	0.69746	0.771433	0	0	0.851958	0.306969	ITGA4;ZBTB16;ASB13;PAK3;PRKG1	0.00656168	0.156481
GO_Biological_Process_2021	antigen receptor-mediated signaling pathway	1/185	0.760041	0.772672	0	0	0.703053	0.192906	PAK3	0.00540541	0.119163
KEGG_2021_Human	Protein processing in endoplasmic reticulum	1/171	0.732547	0.773244	0	0	0.761494	0.236998	SELENOS	0.00584795	0.135165
Reactome_2016	Immunoregulatory interactions between a Lymphoid and a non-Lymphoid cell	1/157	0.701925	0.774026	0	0	0.830423	0.293911	ITGA4	0.00636943	0.153709
Reactome_2016	Organelle biogenesis and maintenance	2/326	0.715147	0.781752	0	0	0.798095	0.267575	SCLT1;TUBA4A	0.00613497	0.145605
Reactome_2016	Downstream signaling of activated FGFR2	2/329	0.71987	0.781752	0	0	0.790652	0.259875	CAMK2B;DUSP1	0.00607903	0.142746
Reactome_2016	Downstream signaling of activated FGFR4	2/329	0.71987	0.781752	0	0	0.790652	0.259875	CAMK2B;DUSP1	0.00607903	0.142746
Reactome_2016	Downstream signaling of activated FGFR3	2/329	0.71987	0.781752	0	0	0.790652	0.259875	CAMK2B;DUSP1	0.00607903	0.142746
Reactome_2016	Signaling by ERBB4	2/330	0.72143	0.781752	0	0	0.788201	0.257363	CAMK2B;DUSP1	0.00606061	0.141806
Reactome_2016	Signaling by FGFR4	2/332	0.724528	0.781752	0	0	0.783343	0.252421	CAMK2B;DUSP1	0.0060241	0.139945
Reactome_2016	Downstream signaling of activated FGFR1	2/332	0.724528	0.781752	0	0	0.783343	0.252421	CAMK2B;DUSP1	0.0060241	0.139945
Reactome_2016	Signaling by FGFR3	2/333	0.726066	0.781752	0	0	0.780937	0.249989	CAMK2B;DUSP1	0.00600601	0.139024
Reactome_2016	Signaling by FGFR1	2/336	0.730637	0.78436	0	0	0.773803	0.24285	CAMK2B;DUSP1	0.00595238	0.136299
KEGG_2021_Human	Tuberculosis	1/180	0.75056	0.787397	0	0	0.722876	0.207419	CAMK2B	0.00555556	0.124615
Reactome_2016	Downstream signal transduction	2/341	0.738112	0.790061	0	0	0.762195	0.231448	CAMK2B;DUSP1	0.0058651	0.131878
Reactome_2016	DAP12 signaling	2/344	0.742512	0.792447	0	0	0.755393	0.224892	CAMK2B;DUSP1	0.00581395	0.129296
KEGG_2021_Human	Amyotrophic lateral sclerosis	2/364	0.770268	0.795395	0	0	0.712927	0.186086	GPX8;TUBA4A	0.00549451	0.113358
KEGG_2021_Human	Chemokine signaling pathway	1/192	0.772716	0.795395	0	0	0.677046	0.174572	CXCR4	0.00520833	0.11198
KEGG_2021_Human	Kaposi sarcoma-associated herpesvirus infection	1/193	0.774472	0.795395	0	0	0.673485	0.172125	TCF7	0.00518135	0.110994
KEGG_2021_Human	Alzheimer disease	2/369	0.77679	0.795395	0	0	0.703033	0.177576	APOE;TUBA4A	0.00542005	0.109697
GO_Biological_Process_2021	negative regulation of intracellular signal transduction	1/198	0.783049	0.795488	0	0	0.656225	0.160486	DUSP1	0.00505051	0.106211
Reactome_2016	Intra-Golgi and retrograde Golgi-to-ER traffic	1/179	0.74862	0.796636	0	0	0.726974	0.210477	KIF1A	0.00558659	0.125739
GO_Biological_Process_2021	regulation of macromolecule metabolic process	1/200	0.786389	0.798304	0	0	0.649564	0.156092	APOE	0.005	0.104363
GO_Biological_Process_2021	modification-dependent protein catabolic process	1/201	0.78804	0.799403	0	0	0.646283	0.153949	FBXW4	0.00497512	0.103452
Reactome_2016	Cell Cycle Checkpoints	1/182	0.754396	0.80045	0	0	0.714815	0.201462	CDC25C	0.00549451	0.1224
GO_Biological_Process_2021	generation of neurons	1/202	0.789678	0.800487	0	0	0.643035	0.15184	MAP1B	0.0049505	0.10255
GO_Biological_Process_2021	regulation of angiogenesis	1/203	0.791303	0.801558	0	0	0.639819	0.149765	GATA4	0.00492611	0.101657
Reactome_2016	Signaling by EGFR	2/355	0.758113	0.802062	0	0	0.731441	0.202553	CAMK2B;DUSP1	0.0056338	0.120266
KEGG_2021_Human	Diabetic cardiomyopathy	1/203	0.791303	0.805433	0	0	0.639819	0.149765	CAMK2B	0.00492611	0.101657
Reactome_2016	DAP12 interactions	2/359	0.763582	0.805512	0	0	0.723097	0.195045	CAMK2B;DUSP1	0.00557103	0.117144
Reactome_2016	Signaling by FGFR2	2/361	0.766276	0.806025	0	0	0.718995	0.191406	CAMK2B;DUSP1	0.00554017	0.115615
Reactome_2016	Signaling by FGFR	2/366	0.772896	0.807663	0	0	0.708937	0.18263	CAMK2B;DUSP1	0.00546448	0.111879
Reactome_2016	Cellular responses to stress	2/367	0.7742	0.807663	0	0	0.706958	0.180928	CAMK2B;GPX8	0.00544959	0.111147
Reactome_2016	Processing of Capped Intron-Containing Pre-mRNA	1/193	0.774472	0.807663	0	0	0.673485	0.172125	ELAVL2	0.00518135	0.110994
Reactome_2016	Interferon Signaling	1/196	0.779658	0.810755	0	0	0.663023	0.165026	CAMK2B	0.00510204	0.108096
Reactome_2016	NGF signalling via TRKA from the plasma membrane	2/374	0.78315	0.811402	0	0	0.693406	0.16949	CAMK2B;DUSP1	0.00534759	0.106155
Reactome_2016	TCF dependent signaling in response to WNT	1/199	0.784726	0.811402	0	0	0.652877	0.158271	TCF7	0.00502513	0.105282
KEGG_2021_Human	Rap1 signaling pathway	1/210	0.802336	0.811832	0	0	0.618169	0.136138	GNAO1	0.0047619	0.0956435
KEGG_2021_Human	Lipid and atherosclerosis	1/215	0.809861	0.814625	0	0	0.603572	0.127289	CAMK2B	0.00465116	0.0915896
GO_Biological_Process_2021	phosphate-containing compound metabolic process	1/212	0.805381	0.815231	0	0	0.612247	0.132515	CERKL	0.00471698	0.0939986
GO_Biological_Process_2021	negative regulation of multicellular organismal process	1/214	0.808379	0.81709	0	0	0.606437	0.129004	RGS2	0.0046729	0.0923849
GO_Biological_Process_2021	positive regulation of GTPase activity	1/214	0.808379	0.81709	0	0	0.606437	0.129004	RGS6	0.0046729	0.0923849
GO_Biological_Process_2021	regulation of I-kappaB kinase/NF-kappaB signaling	1/224	0.822695	0.830963	0	0	0.578947	0.112993	FLNA	0.00446429	0.0847614
Reactome_2016	Fc epsilon receptor (FCERI) signaling	2/395	0.808167	0.83328	0	0	0.655646	0.139644	CAMK2B;DUSP1	0.00506329	0.0924988
Reactome_2016	HIV Infection	1/222	0.819919	0.843015	0	0	0.584246	0.116002	CXCR4	0.0045045	0.086229
KEGG_2021_Human	Shigellosis	1/246	0.850557	0.850557	0	0	0.526369	0.0852003	SEPTIN6	0.00406504	0.0702967
GO_Biological_Process_2021	positive regulation of DNA-binding transcription factor activity	1/246	0.850557	0.858489	0	0	0.526369	0.0852003	SLCO3A1	0.00406504	0.0702967
GO_Biological_Process_2021	RNA splicing, via transesterification reactions with bulged adenosine as nucleophile	1/251	0.856256	0.863621	0	0	0.515711	0.0800312	ELAVL2	0.00398406	0.0673965
Reactome_2016	Cytokine Signaling in Immune system	3/620	0.857186	0.878856	0	0	0.623339	0.096057	CAMK2B;DUSP1;LIFR	0.00483871	0.0669251
Reactome_2016	Signalling by NGF	2/450	0.861969	0.881285	0	0	0.573528	0.0851894	CAMK2B;DUSP1	0.00444444	0.0645083
GO_Biological_Process_2021	mRNA splicing, via spliceosome	1/274	0.879812	0.886744	0	0	0.471708	0.0604009	ELAVL2	0.00364964	0.0556102
Reactome_2016	Cell Cycle, Mitotic	2/462	0.871716	0.888761	0	0	0.558221	0.076639	CDC25C;TUBA4A	0.004329	0.059625
GO_Biological_Process_2021	positive regulation of programmed cell death	1/286	0.890536	0.896911	0	0	0.45157	0.0523513	FRZB	0.0034965	0.0503485
GO_Biological_Process_2021	proteolysis	1/287	0.891386	0.897124	0	0	0.449968	0.0517365	CTSZ	0.00348432	0.0499344
GO_Biological_Process_2021	DNA repair	1/298	0.900309	0.905457	0	0	0.433059	0.0454787	H2AW	0.0033557	0.0456084
GO_Biological_Process_2021	mRNA processing	1/300	0.901851	0.906361	0	0	0.430118	0.0444336	ELAVL2	0.00333333	0.0448651
GO_Biological_Process_2021	innate immune response	1/302	0.90337	0.907239	0	0	0.427216	0.0434151	CHGA	0.00331126	0.0441344
GO_Biological_Process_2021	cellular macromolecule biosynthetic process	1/314	0.912004	0.914604	0	0	0.410585	0.0378195	APOE	0.00318471	0.0400034
GO_Biological_Process_2021	protein polyubiquitination	1/314	0.912004	0.914604	0	0	0.410585	0.0378195	FBXW4	0.00318471	0.0400034
GO_Biological_Process_2021	protein ubiquitination	2/525	0.913299	0.91525	0	0	0.489382	0.0443831	FBXW4;SELENOS	0.00380952	0.0393871
GO_Biological_Process_2021	intracellular protein transport	1/336	0.92589	0.927208	0	0	0.383189	0.0295056	ARL4D	0.00297619	0.0334407
Reactome_2016	Immune System	8/1547	0.912723	0.927977	0	0	0.656333	0.0599383	CAMK2B;ITGA4;DUSP1;ZBTB16;ASB13;LIFR;PAK3;PRKG1	0.0051713	0.0396611
GO_Biological_Process_2021	ubiquitin-dependent protein catabolic process	1/354	0.935614	0.936279	0	0	0.363314	0.0241794	FBXW4	0.00282486	0.0289033
Reactome_2016	Transcriptional Regulation by TP53	1/348	0.932522	0.940944	0	0	0.36971	0.0258288	CDC25C	0.00287356	0.0303408
Reactome_2016	Infectious disease	1/348	0.932522	0.940944	0	0	0.36971	0.0258288	CXCR4	0.00287356	0.0303408
Reactome_2016	Cell Cycle	2/566	0.93321	0.940944	0	0	0.452844	0.0313027	CDC25C;TUBA4A	0.00353357	0.0300205
Reactome_2016	Innate Immune System	3/807	0.949291	0.953355	0	0	0.473706	0.0246515	CAMK2B;DUSP1;PAK3	0.00371747	0.0226005
Reactome_2016	Generic Transcription Pathway	3/812	0.950743	0.953355	0	0	0.470655	0.0237733	GATA4;CDC25C;JUNB	0.00369458	0.0219366
GO_Biological_Process_2021	protein modification by small protein conjugation	1/409	0.958141	0.958141	0	0	0.313451	0.0134034	SELENOS	0.00244499	0.0185707
Reactome_2016	Gene Expression	5/1631	0.995914	0.995914	0	0	0.378582	0.0015499	GATA4;CDC25C;JUNB;A1CF;ELAVL2	0.0030656	0.00177798

## Sheet: Sheet4
Sheet4: Enriched pathways of gene cluster 2 for lineages NGN3-to-Beta,0 vs PEC-to-Beta,1
Gene_set	Term	Overlap	P-value	Adjusted P-value	Old P-value	Old Adjusted P-value	Odds Ratio	Combined Score	Genes	ratio	-log_adj_p
GO_Biological_Process_2021	extracellular structure organization	10/216	1.18208e-07	6.31275e-05	0	0	10.7423	171.349	COL1A1;FBN2;POSTN;SPARC;ADAMTSL4;COL5A2;SPP1;FN1;HSPG2;ADAMTS9	0.0462963	6.92735
GO_Biological_Process_2021	external encapsulating structure organization	10/217	1.23416e-07	6.31275e-05	0	0	10.6899	170.052	COL1A1;FBN2;POSTN;SPARC;ADAMTSL4;COL5A2;SPP1;FN1;HSPG2;ADAMTS9	0.0460829	6.90863
GO_Biological_Process_2021	extracellular matrix organization	11/300	2.81466e-07	9.59797e-05	0	0	8.4827	127.947	COL1A1;FBN2;POSTN;SPARC;ADAMTSL4;COL5A2;SPP1;FN1;PRSS2;HSPG2;ADAMTS9	0.0366667	6.55057
Reactome_2016	Lipid digestion, mobilization, and transport	6/71	1.39393e-06	0.000267502	0	0	19.6883	265.465	PNLIPRP1;PNLIPRP2;FABP3;CLPS;SDC1;HSPG2	0.084507	5.85576
Reactome_2016	Extracellular matrix organization	10/283	1.41162e-06	0.000267502	0	0	8.07836	108.822	COL1A1;FBN2;SPARC;COL5A2;SPP1;FN1;SDC1;PRSS2;HSPG2;ADAMTS9	0.0353357	5.85028
KEGG_2021_Human	Proteoglycans in cancer	8/205	8.18927e-06	0.000926753	0	0	8.79299	102.99	COL1A1;VAV3;CAMK2D;FN1;ITPR1;SDC1;HSPG2;EGFR	0.0390244	5.08675
KEGG_2021_Human	Pancreatic secretion	6/102	1.15844e-05	0.000926753	0	0	13.3098	151.277	PNLIPRP1;PNLIPRP2;CPA1;KCNMA1;ITPR1;PRSS2	0.0588235	4.93613
Reactome_2016	Diseases of glycosylation	5/88	7.59661e-05	0.00616719	0	0	12.7006	120.468	NOTCH2;ADAMTSL4;SDC1;ADAMTS9;HSPG2	0.0568182	4.11938
KEGG_2021_Human	ECM-receptor interaction	5/88	7.59661e-05	0.00405153	0	0	12.7006	120.468	COL1A1;SPP1;FN1;SDC1;HSPG2	0.0568182	4.11938
Reactome_2016	Digestion of dietary lipid	3/17	7.60669e-05	0.00616719	0	0	44.3906	420.996	PNLIPRP1;PNLIPRP2;CLPS	0.176471	4.1188
Reactome_2016	Signaling by PDGF	9/364	8.13613e-05	0.00616719	0	0	5.50592	51.8471	CAMK2D;SPP1;FN1;ITPR1;PIP4K2A;PLAT;ARRB1;EGFR;FGFR2	0.0247253	4.08958
Reactome_2016	Signaling by Hippo	3/20	0.000126156	0.00796886	0	0	36.5515	328.159	YAP1;WWTR1;AMOTL1	0.15	3.89909
KEGG_2021_Human	Arginine biosynthesis	3/22	0.000169201	0.00676805	0	0	32.7007	283.986	GPT2;ASS1;GLS	0.136364	3.7716
GO_Biological_Process_2021	regulation of keratinocyte proliferation	3/24	0.000220787	0.0434577	0	0	29.5833	249.042	NOTCH2;FGFR2;ZFP36L1	0.125	3.65603
Reactome_2016	Signaling by ERBB4	8/330	0.000234876	0.0127169	0	0	5.34544	44.6689	YAP1;CAMK2D;CXCL12;FN1;PIP4K2A;ARRB1;EGFR;FGFR2	0.0242424	3.62916
GO_Biological_Process_2021	negative regulation of smooth muscle contraction	2/5	0.000240209	0.0434577	0	0	136.756	1139.72	DOCK4;KCNMA1	0.4	3.61941
GO_Biological_Process_2021	hippo signaling	3/26	0.00028159	0.0434577	0	0	27.0082	220.793	YAP1;WWTR1;AMOTL1	0.115385	3.55038
GO_Biological_Process_2021	positive regulation of cell differentiation	7/258	0.000297364	0.0434577	0	0	5.95661	48.371	COL1A1;YAP1;FBN2;WWTR1;MMD;CCN2;ZFP36L1	0.0271318	3.52671
Reactome_2016	DAP12 signaling	8/344	0.000310581	0.0133055	0	0	5.11905	41.3469	VAV3;CAMK2D;FN1;ITPR1;PIP4K2A;ARRB1;EGFR;FGFR2	0.0232558	3.50782
Reactome_2016	Signal Transduction	25/2465	0.000315961	0.0133055	0	0	2.41762	19.4857	YAP1;PPP1R15A;NOTCH2;CAMK2D;CRABP2;ITPR1;PLAT;ARRB1;EGFR;PENK;SPP1;PPY;PIP4K2A;TGIF1;VAV3;WWTR1;GPR37;FN1;HSPG2;CXCL12;CLPS;SDC1;AMOTL1;FGFR2;HIST1H2BD	0.010142	3.50037
GO_Biological_Process_2021	regulation of protein phosphorylation	7/266	0.000357507	0.0457162	0	0	5.77027	45.7949	WWTR1;CCND2;LIMCH1;FN1;ARRB1;SLIT2;EGFR	0.0263158	3.44672
Reactome_2016	DAP12 interactions	8/359	0.000412739	0.0156428	0	0	4.89653	38.1571	VAV3;CAMK2D;FN1;ITPR1;PIP4K2A;ARRB1;EGFR;FGFR2	0.0222841	3.38432
KEGG_2021_Human	Focal adhesion	6/201	0.00049338	0.0157882	0	0	6.51977	49.643	COL1A1;VAV3;CCND2;SPP1;FN1;EGFR	0.0298507	3.30682
GO_Biological_Process_2021	integrin activation	2/8	0.000666097	0.0757131	0	0	68.3677	500.046	CXCL12;FN1	0.25	3.17646
KEGG_2021_Human	Regulation of actin cytoskeleton	6/218	0.000755286	0.0184909	0	0	5.99178	43.0714	VAV3;CXCL12;FN1;PIP4K2A;EGFR;FGFR2	0.0275229	3.12189
GO_Biological_Process_2021	regulation of osteoblast differentiation	4/83	0.000769359	0.0787055	0	0	10.5647	75.7483	FBN2;YAP1;WWTR1;FGFR2	0.0481928	3.11387
Reactome_2016	Fc epsilon receptor (FCERI) signaling	8/395	0.000772284	0.0229394	0	0	4.43286	31.7666	VAV3;CAMK2D;FN1;ITPR1;PIP4K2A;ARRB1;EGFR;FGFR2	0.0202532	3.11222
KEGG_2021_Human	Alanine, aspartate and glutamate metabolism	3/37	0.000808976	0.0184909	0	0	18.2601	130.007	GPT2;ASS1;GLS	0.0810811	3.09206
GO_Biological_Process_2021	regulation of epithelial cell apoptotic process	2/10	0.00106362	0.0917144	0	0	51.2706	351.003	YAP1;ZFP36L1	0.2	2.97321
Reactome_2016	VEGFA-VEGFR2 Pathway	7/320	0.00106462	0.0229394	0	0	4.76163	32.594	VAV3;CAMK2D;FN1;ITPR1;ARRB1;EGFR;FGFR2	0.021875	2.97281
Reactome_2016	Retinoid metabolism and transport	3/42	0.00117404	0.0229394	0	0	15.9151	107.384	CLPS;SDC1;HSPG2	0.0714286	2.93032
GO_Biological_Process_2021	regulation of epithelial cell proliferation	4/93	0.0011772	0.0917144	0	0	9.37292	63.2167	YAP1;EGFR;FGFR2;ZFP36L1	0.0430108	2.92915
GO_Biological_Process_2021	regulation of ERK1 and ERK2 cascade	6/238	0.00118868	0.0917144	0	0	5.46969	36.8379	NOTCH2;FN1;ARRB1;CCN2;EGFR;FGFR2	0.0252101	2.92494
Reactome_2016	Signaling by VEGF	7/328	0.00122766	0.0229394	0	0	4.64107	31.1074	VAV3;CAMK2D;FN1;ITPR1;ARRB1;EGFR;FGFR2	0.0213415	2.91092
Reactome_2016	Downstream signaling of activated FGFR3	7/329	0.00124935	0.0229394	0	0	4.62642	30.9282	CAMK2D;FN1;ITPR1;PIP4K2A;ARRB1;EGFR;FGFR2	0.0212766	2.90332
Reactome_2016	Downstream signaling of activated FGFR2	7/329	0.00124935	0.0229394	0	0	4.62642	30.9282	CAMK2D;FN1;ITPR1;PIP4K2A;ARRB1;EGFR;FGFR2	0.0212766	2.90332
Reactome_2016	Downstream signaling of activated FGFR4	7/329	0.00124935	0.0229394	0	0	4.62642	30.9282	CAMK2D;FN1;ITPR1;PIP4K2A;ARRB1;EGFR;FGFR2	0.0212766	2.90332
KEGG_2021_Human	Fat digestion and absorption	3/43	0.00125759	0.0229978	0	0	15.5164	103.627	PNLIPRP1;PNLIPRP2;CLPS	0.0697674	2.90046
KEGG_2021_Human	Human papillomavirus infection	7/331	0.00129362	0.0229978	0	0	4.59739	30.5741	COL1A1;NOTCH2;MAGI1;CCND2;SPP1;FN1;EGFR	0.021148	2.88819
GO_Biological_Process_2021	glutamine family amino acid biosynthetic process	2/11	0.00129579	0.0917144	0	0	45.5716	302.989	ASS1;GLS	0.181818	2.88746
Reactome_2016	Downstream signaling of activated FGFR1	7/332	0.00131622	0.0229394	0	0	4.58301	30.3991	CAMK2D;FN1;ITPR1;PIP4K2A;ARRB1;EGFR;FGFR2	0.0210843	2.88067
Reactome_2016	Signaling by FGFR4	7/332	0.00131622	0.0229394	0	0	4.58301	30.3991	CAMK2D;FN1;ITPR1;PIP4K2A;ARRB1;EGFR;FGFR2	0.0210843	2.88067
Reactome_2016	Signaling by FGFR3	7/333	0.00133912	0.0229394	0	0	4.56872	30.2255	CAMK2D;FN1;ITPR1;PIP4K2A;ARRB1;EGFR;FGFR2	0.021021	2.87318
GO_Biological_Process_2021	positive regulation of osteoblast differentiation	3/44	0.00134479	0.0917144	0	0	15.1372	100.08	FBN2;YAP1;WWTR1	0.0681818	2.87135
Reactome_2016	Signaling by FGFR1	7/336	0.0014097	0.0229394	0	0	4.52636	29.7128	CAMK2D;FN1;ITPR1;PIP4K2A;ARRB1;EGFR;FGFR2	0.0208333	2.85087
Reactome_2016	VEGFR2 mediated cell proliferation	6/248	0.00146652	0.0229394	0	0	5.241	34.1968	CAMK2D;FN1;ITPR1;ARRB1;EGFR;FGFR2	0.0241935	2.83371
GO_Biological_Process_2021	alpha-amino acid metabolic process	3/46	0.00153038	0.0978488	0	0	14.4317	93.5496	GPT2;ASS1;GLS	0.0652174	2.8152
Reactome_2016	Downstream signal transduction	7/341	0.00153378	0.0229394	0	0	4.45747	28.8845	CAMK2D;FN1;ITPR1;PIP4K2A;ARRB1;EGFR;FGFR2	0.0205279	2.81424
Reactome_2016	Defective EXT2 causes exostoses 2	2/12	0.00154994	0.0229394	0	0	41.0124	265.331	SDC1;HSPG2	0.166667	2.80968
Reactome_2016	Defective EXT1 causes exostoses 1, TRPS2 and CHDS	2/12	0.00154994	0.0229394	0	0	41.0124	265.331	SDC1;HSPG2	0.166667	2.80968
Reactome_2016	Metabolism of lipids and lipoproteins	10/659	0.00157368	0.0229394	0	0	3.33304	21.5126	YAP1;PNLIPRP1;WWTR1;PNLIPRP2;FABP3;CLPS;PIP4K2A;SDC1;LTC4S;HSPG2	0.0151745	2.80308
GO_Biological_Process_2021	positive regulation of ERK1 and ERK2 cascade	5/172	0.00165491	0.0995866	0	0	6.28551	40.2525	NOTCH2;ARRB1;CCN2;EGFR;FGFR2	0.0290698	2.78123
KEGG_2021_Human	Protein digestion and absorption	4/103	0.00171677	0.0274683	0	0	8.4219	53.6249	COL1A1;CPA1;COL5A2;PRSS2	0.038835	2.76529
Reactome_2016	Signalling by NGF	8/450	0.00177131	0.024864	0	0	3.87032	24.5225	VAV3;CAMK2D;FN1;ITPR1;PIP4K2A;ARRB1;EGFR;FGFR2	0.0177778	2.7517
KEGG_2021_Human	PI3K-Akt signaling pathway	7/354	0.00189652	0.0275857	0	0	4.28762	26.8737	COL1A1;MAGI1;CCND2;SPP1;FN1;EGFR;FGFR2	0.019774	2.72204
Reactome_2016	Degradation of the extracellular matrix	4/106	0.00190731	0.0251834	0	0	8.17296	51.1796	SPP1;PRSS2;HSPG2;ADAMTS9	0.0377358	2.71958
Reactome_2016	Signaling by EGFR	7/355	0.00192696	0.0251834	0	0	4.27508	26.727	CAMK2D;FN1;ITPR1;PIP4K2A;ARRB1;EGFR;FGFR2	0.0197183	2.71513
Reactome_2016	Metabolism of fat-soluble vitamins	3/51	0.00206231	0.0258902	0	0	12.9251	79.9281	CLPS;SDC1;HSPG2	0.0588235	2.68565
Reactome_2016	Signaling by FGFR2	7/361	0.00211766	0.0258902	0	0	4.20133	25.8695	CAMK2D;FN1;ITPR1;PIP4K2A;ARRB1;EGFR;FGFR2	0.0193906	2.67414
GO_Biological_Process_2021	response to endoplasmic reticulum stress	4/110	0.0021835	0.124096	0	0	7.86296	48.175	PPP1R15A;PDIA2;ITPR1;ERP27	0.0363636	2.66085
Reactome_2016	Signaling by FGFR	7/366	0.00228749	0.0270925	0	0	4.14176	25.1831	CAMK2D;FN1;ITPR1;PIP4K2A;ARRB1;EGFR;FGFR2	0.0191257	2.64064
GO_Biological_Process_2021	positive regulation of MAPK cascade	6/274	0.00242148	0.127098	0	0	4.72629	28.4682	NOTCH2;GPR37;ARRB1;CCN2;EGFR;FGFR2	0.0218978	2.61592
Reactome_2016	NGF signalling via TRKA from the plasma membrane	7/374	0.00258091	0.0296414	0	0	4.04982	24.1353	CAMK2D;FN1;ITPR1;PIP4K2A;ARRB1;EGFR;FGFR2	0.0187166	2.58823
GO_Biological_Process_2021	dicarboxylic acid metabolic process	3/57	0.00283624	0.127098	0	0	11.4855	67.3658	GPT2;HOGA1;ASS1	0.0526316	2.54726
Reactome_2016	Muscle contraction	5/196	0.00291895	0.0325377	0	0	5.48903	32.0369	WWTR1;CAMK2D;CALD1;ITPR1;VIM	0.0255102	2.53477
GO_Biological_Process_2021	eye development	3/58	0.0029803	0.127098	0	0	11.2761	65.579	FBN2;COL5A2;PBX3	0.0517241	2.52574
GO_Biological_Process_2021	regulation of stem cell proliferation	2/17	0.00314275	0.127098	0	0	27.3347	157.521	YAP1;ZFP36L1	0.117647	2.50269
GO_Biological_Process_2021	pulmonary valve morphogenesis	2/17	0.00314275	0.127098	0	0	27.3347	157.521	NOTCH2;SLIT2	0.117647	2.50269
GO_Biological_Process_2021	mesonephric tubule development	2/17	0.00314275	0.127098	0	0	27.3347	157.521	SLIT2;FGFR2	0.117647	2.50269
GO_Biological_Process_2021	positive regulation of cyclin-dependent protein serine/threonine kinase activity	2/17	0.00314275	0.127098	0	0	27.3347	157.521	CCND2;EGFR	0.117647	2.50269
Reactome_2016	Chylomicron-mediated lipid transport	2/17	0.00314275	0.0331814	0	0	27.3347	157.521	SDC1;HSPG2	0.117647	2.50269
Reactome_2016	FCERI mediated MAPK activation	6/289	0.0031518	0.0331814	0	0	4.47236	25.7598	VAV3;CAMK2D;FN1;ARRB1;EGFR;FGFR2	0.0207612	2.50144
GO_Biological_Process_2021	positive regulation of epithelial cell proliferation	4/123	0.00327013	0.127098	0	0	6.99938	40.0569	YAP1;NOTCH2;EGFR;FGFR2	0.0325203	2.48544
Reactome_2016	cGMP effects	2/18	0.00352423	0.0359174	0	0	25.625	144.732	KCNMA1;ITPR1	0.111111	2.45294
GO_Biological_Process_2021	pulmonary valve development	2/18	0.00352423	0.127098	0	0	25.625	144.732	NOTCH2;SLIT2	0.111111	2.45294
Reactome_2016	Diseases associated with O-glycosylation of proteins	3/62	0.00360122	0.0359174	0	0	10.5095	59.1317	NOTCH2;ADAMTSL4;ADAMTS9	0.0483871	2.44355
GO_Biological_Process_2021	neuropeptide signaling pathway	3/63	0.00376783	0.127098	0	0	10.3339	57.6759	GPR37;PENK;PPY	0.047619	2.42391
GO_Biological_Process_2021	positive regulation of cellular process	9/625	0.00382339	0.127098	0	0	3.13068	17.4273	WWTR1;CXCL12;CCND2;FN1;CCN2;PRSS2;EGFR;FGFR2;ZFP36L1	0.0144	2.41755
KEGG_2021_Human	Rap1 signaling pathway	5/210	0.00391795	0.04768	0	0	5.11053	28.3235	VAV3;MAGI1;DOCK4;EGFR;FGFR2	0.0238095	2.40694
Reactome_2016	Defective B3GALT6 causes EDSP2 and SEMDJL1	2/19	0.00392618	0.0362932	0	0	24.1164	133.607	SDC1;HSPG2	0.105263	2.40603
GO_Biological_Process_2021	ureteric bud development	2/19	0.00392618	0.127098	0	0	24.1164	133.607	SLIT2;FGFR2	0.105263	2.40603
Reactome_2016	Defective B4GALT7 causes EDS, progeroid type	2/19	0.00392618	0.0362932	0	0	24.1164	133.607	SDC1;HSPG2	0.105263	2.40603
Reactome_2016	Defective B3GAT3 causes JDSSDHD	2/19	0.00392618	0.0362932	0	0	24.1164	133.607	SDC1;HSPG2	0.105263	2.40603
GO_Biological_Process_2021	diterpenoid metabolic process	3/64	0.00393908	0.127098	0	0	10.1639	56.2757	CLPS;SDC1;HSPG2	0.046875	2.4046
KEGG_2021_Human	GnRH secretion	3/64	0.00393908	0.04768	0	0	10.1639	56.2757	ITPR1;SPP1;ARRB1	0.046875	2.4046
Reactome_2016	Axon guidance	8/515	0.00404567	0.0365073	0	0	3.36285	18.5297	VAV3;ABLIM1;CAMK2D;FN1;ARRB1;SLIT2;EGFR;FGFR2	0.015534	2.39301
GO_Biological_Process_2021	regulation of cellular catabolic process	3/65	0.004115	0.127098	0	0	9.9995	54.9284	ITPR1;PIP4K2A;DEPP1	0.0461538	2.38563
GO_Biological_Process_2021	positive regulation of cell cycle	3/66	0.00429564	0.127098	0	0	9.84028	53.631	CCND2;EGFR;FGFR2	0.0454545	2.36697
GO_Biological_Process_2021	eye morphogenesis	2/20	0.00434841	0.127098	0	0	22.7755	123.852	FBN2;COL5A2	0.1	2.36167
GO_Biological_Process_2021	positive regulation of cyclin-dependent protein kinase activity	2/20	0.00434841	0.127098	0	0	22.7755	123.852	CCND2;EGFR	0.1	2.36167
Reactome_2016	Integrin cell surface interactions	3/67	0.00448102	0.0394955	0	0	9.68604	52.3812	SPP1;FN1;HSPG2	0.0447761	2.34862
GO_Biological_Process_2021	regulation of cell growth	5/217	0.00449995	0.127874	0	0	4.94003	26.6944	CAMK2D;SPOCK1;SLIT2;PRSS2;EGFR	0.0230415	2.34679
Reactome_2016	HS-GAG degradation	2/21	0.0047907	0.0412654	0	0	21.5757	115.237	SDC1;HSPG2	0.0952381	2.3196
KEGG_2021_Human	Apelin signaling pathway	4/137	0.0048001	0.04768	0	0	6.25817	33.4131	SPP1;ITPR1;PLAT;CCN2	0.0291971	2.31875
KEGG_2021_Human	Pathways in cancer	8/531	0.00485403	0.04768	0	0	3.25729	17.3546	NOTCH2;NQO1;CAMK2D;CXCL12;CCND2;FN1;EGFR;FGFR2	0.0150659	2.3139
KEGG_2021_Human	Fluid shear stress and atherosclerosis	4/139	0.0050519	0.04768	0	0	6.16483	32.5996	NQO1;SDC1;PLAT;ASS1	0.028777	2.29654
KEGG_2021_Human	Central carbon metabolism in cancer	3/70	0.005066	0.04768	0	0	9.25093	48.8931	EGFR;FGFR2;GLS	0.0428571	2.29534
GO_Biological_Process_2021	transcription initiation from RNA polymerase II promoter	4/140	0.00518107	0.140179	0	0	6.1192	32.2038	YAP1;NOTCH2;WWTR1;CCN2	0.0285714	2.28558
GO_Biological_Process_2021	cellular response to osmotic stress	2/22	0.00525285	0.140179	0	0	20.4959	107.583	YBX3;ZFP36L1	0.0909091	2.2796
GO_Biological_Process_2021	negative regulation of epithelial cell proliferation	3/72	0.00548036	0.140179	0	0	8.98188	46.7649	SPARC;NFIB;FGFR2	0.0416667	2.26119
Reactome_2016	Signaling by SCF-KIT	6/325	0.0055658	0.0412715	0	0	3.96036	20.5587	CAMK2D;FN1;PIP4K2A;ARRB1;EGFR;FGFR2	0.0184615	2.25447
Reactome_2016	Signaling by TGF-beta Receptor Complex	3/73	0.00569495	0.0412715	0	0	8.85313	45.7545	TGIF1;PPP1R15A;WWTR1	0.0410959	2.24451
GO_Biological_Process_2021	regulation of SMAD protein signal transduction	2/23	0.00573466	0.140179	0	0	19.5189	100.741	WWTR1;RBPMS	0.0869565	2.24149
GO_Biological_Process_2021	triglyceride catabolic process	2/23	0.00573466	0.140179	0	0	19.5189	100.741	PNLIPRP2;FABP3	0.0869565	2.24149
Reactome_2016	Hemostasis	8/552	0.00609728	0.0412715	0	0	3.12815	15.9533	VAV3;DOCK4;SPARC;KCNMA1;FN1;ITPR1;PLAT;ARRB1	0.0144928	2.21486
GO_Biological_Process_2021	leukotriene metabolic process	2/24	0.00623592	0.140179	0	0	18.6307	94.5963	CPA1;LTC4S	0.0833333	2.2051
Reactome_2016	RAF/MAP kinase cascade	5/235	0.0062759	0.0412715	0	0	4.54926	23.0695	CAMK2D;FN1;ARRB1;EGFR;FGFR2	0.0212766	2.20232
Reactome_2016	SHC1 events in ERBB4 signaling	5/235	0.0062759	0.0412715	0	0	4.54926	23.0695	CAMK2D;FN1;ARRB1;EGFR;FGFR2	0.0212766	2.20232
Reactome_2016	SOS-mediated signalling	5/235	0.0062759	0.0412715	0	0	4.54926	23.0695	CAMK2D;FN1;ARRB1;EGFR;FGFR2	0.0212766	2.20232
Reactome_2016	SHC1 events in EGFR signaling	5/235	0.0062759	0.0412715	0	0	4.54926	23.0695	CAMK2D;FN1;ARRB1;EGFR;FGFR2	0.0212766	2.20232
Reactome_2016	GRB2 events in EGFR signaling	5/235	0.0062759	0.0412715	0	0	4.54926	23.0695	CAMK2D;FN1;ARRB1;EGFR;FGFR2	0.0212766	2.20232
Reactome_2016	FRS-mediated FGFR2 signaling	5/236	0.00638711	0.0412715	0	0	4.52934	22.8889	CAMK2D;FN1;ARRB1;EGFR;FGFR2	0.0211864	2.1947
Reactome_2016	FRS-mediated FGFR4 signaling	5/236	0.00638711	0.0412715	0	0	4.52934	22.8889	CAMK2D;FN1;ARRB1;EGFR;FGFR2	0.0211864	2.1947
Reactome_2016	FRS-mediated FGFR3 signaling	5/236	0.00638711	0.0412715	0	0	4.52934	22.8889	CAMK2D;FN1;ARRB1;EGFR;FGFR2	0.0211864	2.1947
Reactome_2016	FRS-mediated FGFR1 signaling	5/236	0.00638711	0.0412715	0	0	4.52934	22.8889	CAMK2D;FN1;ARRB1;EGFR;FGFR2	0.0211864	2.1947
GO_Biological_Process_2021	cellular response to organic cyclic compound	4/150	0.00659623	0.140179	0	0	5.69719	28.607	AQP8;SPP1;EGFR;ZFP36L1	0.0266667	2.1807
Reactome_2016	Innate Immune System	10/807	0.00662837	0.0412715	0	0	2.69325	13.5104	VAV3;CAMK2D;FN1;ITPR1;PIP4K2A;TXNIP;ARRB1;PRSS2;EGFR;FGFR2	0.0123916	2.17859
Reactome_2016	ARMS-mediated activation	5/239	0.00672903	0.0412715	0	0	4.47059	22.3589	CAMK2D;FN1;ARRB1;EGFR;FGFR2	0.0209205	2.17205
Reactome_2016	Signalling to p38 via RIT and RIN	5/239	0.00672903	0.0412715	0	0	4.47059	22.3589	CAMK2D;FN1;ARRB1;EGFR;FGFR2	0.0209205	2.17205
GO_Biological_Process_2021	regulation of cardiac muscle cell action potential	2/25	0.00675644	0.140179	0	0	17.8198	89.0502	CAMK2D;DSC2	0.08	2.17028
GO_Biological_Process_2021	ventricular cardiac muscle tissue development	2/25	0.00675644	0.140179	0	0	17.8198	89.0502	ADAMTS9;FGFR2	0.08	2.17028
Reactome_2016	Amino acid synthesis and interconversion (transamination)	2/25	0.00675644	0.0412715	0	0	17.8198	89.0502	GPT2;GLS	0.08	2.17028
Reactome_2016	Nitric oxide stimulates guanylate cyclase	2/25	0.00675644	0.0412715	0	0	17.8198	89.0502	KCNMA1;ITPR1	0.08	2.17028
Reactome_2016	Frs2-mediated activation	5/240	0.0068458	0.0412715	0	0	4.45134	22.186	CAMK2D;FN1;ARRB1;EGFR;FGFR2	0.0208333	2.16458
Reactome_2016	MAPK1/MAPK3 signaling	5/241	0.00696399	0.0412715	0	0	4.43225	22.015	CAMK2D;FN1;ARRB1;EGFR;FGFR2	0.0207469	2.15714
Reactome_2016	Prolonged ERK activation events	5/242	0.0070836	0.0412715	0	0	4.41332	21.8458	CAMK2D;FN1;ARRB1;EGFR;FGFR2	0.0206612	2.14975
Reactome_2016	Signaling by Leptin	5/243	0.00720464	0.0412715	0	0	4.39456	21.6785	CAMK2D;FN1;ARRB1;EGFR;FGFR2	0.0205761	2.14239
GO_Biological_Process_2021	regulation of monocyte chemotaxis	2/26	0.00729602	0.140179	0	0	17.0765	84.0235	CXCL12;SLIT2	0.0769231	2.13691
GO_Biological_Process_2021	positive regulation of G1/S transition of mitotic cell cycle	2/26	0.00729602	0.140179	0	0	17.0765	84.0235	CCND2;EGFR	0.0769231	2.13691
Reactome_2016	A tetrasaccharide linker sequence is required for GAG synthesis	2/26	0.00729602	0.0412715	0	0	17.0765	84.0235	SDC1;HSPG2	0.0769231	2.13691
Reactome_2016	Diseases associated with glycosaminoglycan metabolism	2/26	0.00729602	0.0412715	0	0	17.0765	84.0235	SDC1;HSPG2	0.0769231	2.13691
GO_Biological_Process_2021	positive regulation of cell adhesion	3/80	0.00733823	0.140179	0	0	8.04545	39.5407	MAGI1;CXCL12;PRSS2	0.0375	2.13441
GO_Biological_Process_2021	skin development	3/80	0.00733823	0.140179	0	0	8.04545	39.5407	COL1A1;COL5A2;TXNIP	0.0375	2.13441
GO_Biological_Process_2021	regulation of fat cell differentiation	3/80	0.00733823	0.140179	0	0	8.04545	39.5407	YAP1;WWTR1;ZFP36L1	0.0375	2.13441
Reactome_2016	Interleukin receptor SHC signaling	5/245	0.00745105	0.0415286	0	0	4.35749	21.3491	CAMK2D;FN1;ARRB1;EGFR;FGFR2	0.0204082	2.12778
Reactome_2016	Signalling to RAS	5/246	0.00757644	0.0416155	0	0	4.33919	21.187	CAMK2D;FN1;ARRB1;EGFR;FGFR2	0.0203252	2.12053
GO_Biological_Process_2021	negative regulation of protein modification process	3/81	0.00759347	0.140179	0	0	7.94191	38.7602	PPP1R15A;WWTR1;SLIT2	0.037037	2.11956
GO_Biological_Process_2021	negative regulation of plasma membrane bounded cell projection assembly	2/27	0.00785445	0.140179	0	0	16.3926	79.4495	YAP1;SLIT2	0.0740741	2.10488
GO_Biological_Process_2021	response to glucocorticoid	2/27	0.00785445	0.140179	0	0	16.3926	79.4495	SLIT2;ZFP36L1	0.0740741	2.10488
GO_Biological_Process_2021	regulation of cardiac muscle cell contraction	2/27	0.00785445	0.140179	0	0	16.3926	79.4495	CAMK2D;DSC2	0.0740741	2.10488
Reactome_2016	PI5P, PP2A and IER3 Regulate PI3K/AKT Signaling	3/83	0.00811959	0.0439618	0	0	7.74258	37.2687	PIP4K2A;EGFR;FGFR2	0.0361446	2.09047
GO_Biological_Process_2021	epidermis development	3/83	0.00811959	0.140179	0	0	7.74258	37.2687	CRABP2;CCN2;FGFR2	0.0361446	2.09047
GO_Biological_Process_2021	regulation of Notch signaling pathway	3/83	0.00811959	0.140179	0	0	7.74258	37.2687	YAP1;ARRB1;EGFR	0.0361446	2.09047
Reactome_2016	Interleukin-2 signaling	5/252	0.00835985	0.0441077	0	0	4.23249	20.2496	CAMK2D;FN1;ARRB1;EGFR;FGFR2	0.0198413	2.0778
GO_Biological_Process_2021	response to ketone	2/28	0.00843154	0.140179	0	0	15.7613	75.2724	YAP1;SLIT2	0.0714286	2.07409
GO_Biological_Process_2021	cellular response to epidermal growth factor stimulus	2/28	0.00843154	0.140179	0	0	15.7613	75.2724	EGFR;ZFP36L1	0.0714286	2.07409
GO_Biological_Process_2021	regulation of calcium-mediated signaling	2/28	0.00843154	0.140179	0	0	15.7613	75.2724	ITPR1;RGN	0.0714286	2.07409
GO_Biological_Process_2021	RNA phosphodiester bond hydrolysis	2/28	0.00843154	0.140179	0	0	15.7613	75.2724	RNASE4;RNASE1	0.0714286	2.07409
GO_Biological_Process_2021	positive regulation of phosphorylation	5/253	0.00849568	0.140179	0	0	4.21521	20.099	CCND2;LIMCH1;ARRB1;EGFR;FGFR2	0.0197628	2.0708
Reactome_2016	Signalling to ERKs	5/253	0.00849568	0.0441077	0	0	4.21521	20.099	CAMK2D;FN1;ARRB1;EGFR;FGFR2	0.0197628	2.0708
GO_Biological_Process_2021	regulation of canonical Wnt signaling pathway	5/253	0.00849568	0.140179	0	0	4.21521	20.099	COL1A1;WWTR1;EGFR;FGFR2;BICC1	0.0197628	2.0708
Reactome_2016	Platelet activation, signaling and aggregation	5/253	0.00849568	0.0441077	0	0	4.21521	20.099	VAV3;SPARC;FN1;ITPR1;ARRB1	0.0197628	2.0708
KEGG_2021_Human	Hippo signaling pathway	4/163	0.00879051	0.0781379	0	0	5.22794	24.7495	YAP1;WWTR1;CCND2;CCN2	0.0245399	2.05599
GO_Biological_Process_2021	intrinsic apoptotic signaling pathway in response to endoplasmic reticulum stress	2/29	0.0090271	0.146583	0	0	15.1768	71.4451	PPP1R15A;ITPR1	0.0689655	2.04445
Reactome_2016	YAP1- and WWTR1 (TAZ)-stimulated gene expression	2/29	0.0090271	0.0462334	0	0	15.1768	71.4451	YAP1;WWTR1	0.0689655	2.04445
GO_Biological_Process_2021	negative regulation of angiogenesis	3/87	0.00923498	0.146961	0	0	7.3724	34.5379	SPARC;ADAMTS9;HSPG2	0.0344828	2.03456
GO_Biological_Process_2021	regulation of MAPK cascade	4/166	0.0093569	0.146961	0	0	5.13034	23.9671	GPR37;FN1;EGFR;FGFR2	0.0240964	2.02887
Reactome_2016	Interleukin-3, 5 and GM-CSF signaling	5/261	0.0096379	0.0487035	0	0	4.08182	18.948	CAMK2D;FN1;ARRB1;EGFR;FGFR2	0.0191571	2.01602
GO_Biological_Process_2021	negative regulation of Notch signaling pathway	2/30	0.00964093	0.146961	0	0	14.634	67.9273	ARRB1;EGFR	0.0666667	2.01588
GO_Biological_Process_2021	DNA-templated transcription, initiation	4/168	0.00974741	0.146961	0	0	5.06727	23.4653	YAP1;NOTCH2;WWTR1;CCN2	0.0238095	2.01111
GO_Biological_Process_2021	regulation of endothelial cell migration	3/89	0.00982459	0.146961	0	0	7.20022	33.2857	SPARC;SLIT2;ADAMTS9	0.0337079	2.00769
Reactome_2016	Negative regulation of the PI3K/AKT network	3/90	0.0101274	0.0505039	0	0	7.1171	32.6853	PIP4K2A;EGFR;FGFR2	0.0333333	1.9945
Reactome_2016	HS-GAG biosynthesis	2/31	0.0102729	0.050549	0	0	14.1287	64.6847	SDC1;HSPG2	0.0645161	1.98831
GO_Biological_Process_2021	cellular response to cAMP	2/31	0.0102729	0.146961	0	0	14.1287	64.6847	AQP8;ZFP36L1	0.0645161	1.98831
GO_Biological_Process_2021	regulation of cellular component size	2/31	0.0102729	0.146961	0	0	14.1287	64.6847	PPP1R15A;VAV3	0.0645161	1.98831
GO_Biological_Process_2021	aminoglycan catabolic process	2/31	0.0102729	0.146961	0	0	14.1287	64.6847	SDC1;HSPG2	0.0645161	1.98831
GO_Biological_Process_2021	positive regulation of protein phosphorylation	6/371	0.0103433	0.146961	0	0	3.45312	15.7856	CCND2;RBPMS;LIMCH1;MMD;ARRB1;EGFR	0.0161725	1.98534
Reactome_2016	NCAM signaling for neurite out-growth	5/266	0.0104032	0.050549	0	0	4.00261	18.2745	CAMK2D;FN1;ARRB1;EGFR;FGFR2	0.018797	1.98283
GO_Biological_Process_2021	retinoid metabolic process	3/92	0.0107493	0.150638	0	0	6.95646	31.533	CLPS;SDC1;HSPG2	0.0326087	1.96862
Reactome_2016	SMAD2/SMAD3:SMAD4 heterotrimer regulates transcription	2/32	0.0109227	0.0524011	0	0	13.657	61.6877	TGIF1;WWTR1	0.0625	1.96167
KEGG_2021_Human	GnRH signaling pathway	3/93	0.0110684	0.0932075	0	0	6.87882	30.9799	CAMK2D;ITPR1;EGFR	0.0322581	1.95592
Reactome_2016	EGFR interacts with phospholipase C-gamma	2/34	0.0122752	0.0573087	0	0	12.8022	56.3319	ITPR1;EGFR	0.0588235	1.91097
Reactome_2016	Lipoprotein metabolism	2/34	0.0122752	0.0573087	0	0	12.8022	56.3319	SDC1;HSPG2	0.0588235	1.91097
GO_Biological_Process_2021	positive regulation of cellular biosynthetic process	4/180	0.0123137	0.170228	0	0	4.7189	20.7492	FABP3;VIM;ASS1;EGFR	0.0222222	1.90961
KEGG_2021_Human	Prostate cancer	3/97	0.0123992	0.0973677	0	0	6.58477	28.908	PLAT;FGFR2;EGFR	0.0309278	1.90661
Reactome_2016	Visual phototransduction	3/97	0.0123992	0.0573087	0	0	6.58477	28.908	CLPS;SDC1;HSPG2	0.0309278	1.90661
KEGG_2021_Human	Axon guidance	4/182	0.0127795	0.0973677	0	0	4.66541	20.3408	ABLIM1;CAMK2D;CXCL12;SLIT2	0.021978	1.89349
GO_Biological_Process_2021	positive regulation of cell cycle G1/S phase transition	2/35	0.0129776	0.172416	0	0	12.4136	53.9314	CCND2;EGFR	0.0571429	1.88681
GO_Biological_Process_2021	negative regulation of epithelial cell migration	2/35	0.0129776	0.172416	0	0	12.4136	53.9314	SLIT2;ADAMTS9	0.0571429	1.88681
GO_Biological_Process_2021	acylglycerol catabolic process	2/35	0.0129776	0.172416	0	0	12.4136	53.9314	PNLIPRP2;FABP3	0.0571429	1.88681
Reactome_2016	MAPK family signaling cascades	5/284	0.0135027	0.0609229	0	0	3.74094	16.1043	CAMK2D;FN1;ARRB1;EGFR;FGFR2	0.0176056	1.86958
Reactome_2016	IRS-mediated signalling	5/284	0.0135027	0.0609229	0	0	3.74094	16.1043	CAMK2D;FN1;ARRB1;EGFR;FGFR2	0.0176056	1.86958
GO_Biological_Process_2021	negative regulation of fat cell differentiation	2/36	0.0136971	0.179642	0	0	12.0479	51.6924	YAP1;WWTR1	0.0555556	1.86337
Reactome_2016	Insulin receptor signalling cascade	5/287	0.0140737	0.0614481	0	0	3.70058	15.7772	CAMK2D;FN1;ARRB1;EGFR;FGFR2	0.0174216	1.85159
Reactome_2016	IGF1R signaling cascade	5/288	0.0142676	0.0614481	0	0	3.68732	15.6702	CAMK2D;FN1;ARRB1;EGFR;FGFR2	0.0173611	1.84565
Reactome_2016	Signaling by Type 1 Insulin-like Growth Factor 1 Receptor (IGF1R)	5/288	0.0142676	0.0614481	0	0	3.68732	15.6702	CAMK2D;FN1;ARRB1;EGFR;FGFR2	0.0173611	1.84565
Reactome_2016	IRS-related events triggered by IGF1R	5/288	0.0142676	0.0614481	0	0	3.68732	15.6702	CAMK2D;FN1;ARRB1;EGFR;FGFR2	0.0173611	1.84565
GO_Biological_Process_2021	positive regulation of exocytosis	2/37	0.0144335	0.182879	0	0	11.7031	49.6001	CADPS2;SDC1	0.0540541	1.84063
Reactome_2016	Defective B3GALTL causes Peters-plus syndrome (PpS)	2/37	0.0144335	0.0614641	0	0	11.7031	49.6001	ADAMTSL4;ADAMTS9	0.0540541	1.84063
GO_Biological_Process_2021	cellular response to organonitrogen compound	3/103	0.0145607	0.182879	0	0	6.18781	26.1709	AQP8;SLIT2;ZFP36L1	0.0291262	1.83682
GO_Biological_Process_2021	cellular metal ion homeostasis	3/104	0.0149403	0.182879	0	0	6.12624	25.7528	CXCL12;KCNMA1;RGN	0.0288462	1.82564
GO_Biological_Process_2021	negative regulation of cell differentiation	4/191	0.0150148	0.182879	0	0	4.43884	18.6374	YAP1;WWTR1;COL5A2;EGFR	0.0209424	1.82348
Reactome_2016	O-glycosylation of TSR domain-containing proteins	2/38	0.0151868	0.0632504	0	0	11.3774	47.6411	ADAMTSL4;ADAMTS9	0.0526316	1.81853
GO_Biological_Process_2021	negative regulation of endothelial cell migration	2/38	0.0151868	0.182879	0	0	11.3774	47.6411	SLIT2;ADAMTS9	0.0526316	1.81853
GO_Biological_Process_2021	response to cAMP	2/38	0.0151868	0.182879	0	0	11.3774	47.6411	AQP8;ZFP36L1	0.0526316	1.81853
Reactome_2016	MAP2K and MAPK activation	2/38	0.0151868	0.0632504	0	0	11.3774	47.6411	FN1;ARRB1	0.0526316	1.81853
Reactome_2016	Peptide ligand-binding receptors	4/193	0.015543	0.0640304	0	0	4.39142	18.2865	CXCL12;GPR37;PENK;PPY	0.0207254	1.80847
GO_Biological_Process_2021	regulation of phosphatidylinositol 3-kinase signaling	3/106	0.0157164	0.182879	0	0	6.00667	24.946	FN1;PIP4K2A;EGFR	0.0283019	1.80365
KEGG_2021_Human	Parathyroid hormone synthesis, secretion and action	3/106	0.0157164	0.114301	0	0	6.00667	24.946	ITPR1;ARRB1;EGFR	0.0283019	1.80365
GO_Biological_Process_2021	regulation of cell migration	6/408	0.0158921	0.182879	0	0	3.12935	12.9616	COL1A1;CXCL12;LIMCH1;AMOTL1;SLIT2;EGFR	0.0147059	1.79882
Reactome_2016	Developmental Biology	9/786	0.0159026	0.0643357	0	0	2.46126	10.1928	VAV3;ABLIM1;CAMK2D;FN1;ARRB1;SLIT2;EGFR;FGFR2;HIST1H2BD	0.0114504	1.79853
Reactome_2016	Nuclear signaling by ERBB4	2/39	0.0159566	0.0643357	0	0	11.0694	45.8038	YAP1;CXCL12	0.0512821	1.79706
GO_Biological_Process_2021	regulation of heart rate by cardiac conduction	2/39	0.0159566	0.182879	0	0	11.0694	45.8038	CAMK2D;DSC2	0.0512821	1.79706
GO_Biological_Process_2021	regulation of cell development	2/41	0.0175454	0.182879	0	0	10.5007	42.4538	NOTCH2;YAP1	0.0487805	1.75584
GO_Biological_Process_2021	axon guidance	4/203	0.0183592	0.182879	0	0	4.16863	16.6646	NOTCH2;CXCL12;NFIB;SLIT2	0.0197044	1.73615
GO_Biological_Process_2021	phosphatidylinositol phosphate biosynthetic process	2/42	0.0183639	0.182879	0	0	10.2376	40.9235	PIP4K2A;FAM126A	0.047619	1.73603
GO_Biological_Process_2021	positive regulation of ATPase activity	2/42	0.0183639	0.182879	0	0	10.2376	40.9235	VMP1;RGN	0.047619	1.73603
GO_Biological_Process_2021	positive regulation of epithelial to mesenchymal transition	2/42	0.0183639	0.182879	0	0	10.2376	40.9235	COL1A1;WWTR1	0.047619	1.73603
GO_Biological_Process_2021	skeletal system morphogenesis	2/42	0.0183639	0.182879	0	0	10.2376	40.9235	FBN2;FGFR2	0.047619	1.73603
Reactome_2016	Non-integrin membrane-ECM interactions	2/42	0.0183639	0.0724993	0	0	10.2376	40.9235	SDC1;HSPG2	0.047619	1.73603
Reactome_2016	Netrin-1 signaling	2/42	0.0183639	0.0724993	0	0	10.2376	40.9235	ABLIM1;SLIT2	0.047619	1.73603
KEGG_2021_Human	MicroRNAs in cancer	5/310	0.0189992	0.132168	0	0	3.41751	13.5448	NOTCH2;CCND2;VIM;EGFR;GLS	0.016129	1.72126
GO_Biological_Process_2021	positive regulation of kinase activity	3/114	0.0190449	0.182879	0	0	5.57151	22.0685	MMD;EGFR;FGFR2	0.0263158	1.72022
Reactome_2016	Signaling by Insulin receptor	5/311	0.019236	0.0751593	0	0	3.40617	13.4577	CAMK2D;FN1;ARRB1;EGFR;FGFR2	0.0160772	1.71589
Reactome_2016	Transcriptional activity of SMAD2/SMAD3:SMAD4 heterotrimer	2/44	0.0200486	0.0775348	0	0	9.74914	38.1152	TGIF1;WWTR1	0.0454545	1.69792
GO_Biological_Process_2021	embryonic organ morphogenesis	2/44	0.0200486	0.182879	0	0	9.74914	38.1152	FBN2;FGFR2	0.0454545	1.69792
GO_Biological_Process_2021	positive regulation of stress fiber assembly	2/44	0.0200486	0.182879	0	0	9.74914	38.1152	LIMCH1;CCN2	0.0454545	1.69792
GO_Biological_Process_2021	homotypic cell-cell adhesion	2/44	0.0200486	0.182879	0	0	9.74914	38.1152	FN1;DSC2	0.0454545	1.69792
Reactome_2016	Gastrin-CREB signalling pathway via PKC and MAPK	6/432	0.0204351	0.0782313	0	0	2.94942	11.4747	CAMK2D;FN1;ITPR1;ARRB1;EGFR;FGFR2	0.0138889	1.68962
GO_Biological_Process_2021	positive regulation of organelle assembly	2/46	0.0217954	0.182879	0	0	9.30506	35.6017	PIP4K2A;SDC1	0.0434783	1.66164
GO_Biological_Process_2021	positive regulation of protein modification process	4/214	0.0218022	0.182879	0	0	3.94807	15.1043	CCND2;LIMCH1;ARRB1;EGFR	0.0186916	1.6615
GO_Biological_Process_2021	cellular response to oxygen-containing compound	5/323	0.0222308	0.182879	0	0	3.27563	12.4679	AQP8;VIM;SLIT2;EGFR;ZFP36L1	0.0154799	1.65304
GO_Biological_Process_2021	regulation of protein localization to nucleus	2/47	0.0226917	0.182879	0	0	9.09782	34.4422	YAP1;WWTR1	0.0425532	1.64413
Reactome_2016	PI-3K cascade:FGFR2	3/122	0.0227343	0.0820599	0	0	5.19485	19.6567	PIP4K2A;EGFR;FGFR2	0.0245902	1.64332
Reactome_2016	PI-3K cascade:FGFR1	3/122	0.0227343	0.0820599	0	0	5.19485	19.6567	PIP4K2A;EGFR;FGFR2	0.0245902	1.64332
Reactome_2016	PI3K events in ERBB4 signaling	3/122	0.0227343	0.0820599	0	0	5.19485	19.6567	PIP4K2A;EGFR;FGFR2	0.0245902	1.64332
Reactome_2016	PIP3 activates AKT signaling	3/122	0.0227343	0.0820599	0	0	5.19485	19.6567	PIP4K2A;EGFR;FGFR2	0.0245902	1.64332
Reactome_2016	PI-3K cascade:FGFR4	3/122	0.0227343	0.0820599	0	0	5.19485	19.6567	PIP4K2A;EGFR;FGFR2	0.0245902	1.64332
Reactome_2016	PI-3K cascade:FGFR3	3/122	0.0227343	0.0820599	0	0	5.19485	19.6567	PIP4K2A;EGFR;FGFR2	0.0245902	1.64332
Reactome_2016	GAB1 signalosome	3/125	0.0242111	0.0857569	0	0	5.06634	18.8516	PIP4K2A;EGFR;FGFR2	0.024	1.61599
Reactome_2016	PI3K/AKT activation	3/125	0.0242111	0.0857569	0	0	5.06634	18.8516	PIP4K2A;EGFR;FGFR2	0.024	1.61599
GO_Biological_Process_2021	response to salt stress	1/5	0.0245084	0.182879	0	0	50.7577	188.247	ZFP36L1	0.2	1.61068
GO_Biological_Process_2021	cellular response to salt stress	1/5	0.0245084	0.182879	0	0	50.7577	188.247	ZFP36L1	0.2	1.61068
GO_Biological_Process_2021	negative regulation of cell volume	1/5	0.0245084	0.182879	0	0	50.7577	188.247	KCNMA1	0.2	1.61068
GO_Biological_Process_2021	anion homeostasis	1/5	0.0245084	0.182879	0	0	50.7577	188.247	GLS	0.2	1.61068
GO_Biological_Process_2021	negative regulation of PERK-mediated unfolded protein response	1/5	0.0245084	0.182879	0	0	50.7577	188.247	PPP1R15A	0.2	1.61068
GO_Biological_Process_2021	cellular response to heparin	1/5	0.0245084	0.182879	0	0	50.7577	188.247	SLIT2	0.2	1.61068
GO_Biological_Process_2021	regulation of growth rate	1/5	0.0245084	0.182879	0	0	50.7577	188.247	NOTCH2	0.2	1.61068
GO_Biological_Process_2021	chemokine (C-X-C motif) ligand 12 signaling pathway	1/5	0.0245084	0.182879	0	0	50.7577	188.247	CXCL12	0.2	1.61068
GO_Biological_Process_2021	cellular response to vitamin	1/5	0.0245084	0.182879	0	0	50.7577	188.247	POSTN	0.2	1.61068
GO_Biological_Process_2021	regulation of morphogenesis of a branching structure	1/5	0.0245084	0.182879	0	0	50.7577	188.247	FGFR2	0.2	1.61068
GO_Biological_Process_2021	p38MAPK cascade	1/5	0.0245084	0.182879	0	0	50.7577	188.247	ZFP36L1	0.2	1.61068
GO_Biological_Process_2021	regulation of protein kinase C activity	1/5	0.0245084	0.182879	0	0	50.7577	188.247	EGFR	0.2	1.61068
GO_Biological_Process_2021	regulation of retinal ganglion cell axon guidance	1/5	0.0245084	0.182879	0	0	50.7577	188.247	SLIT2	0.2	1.61068
GO_Biological_Process_2021	regulation of vascular associated smooth muscle contraction	1/5	0.0245084	0.182879	0	0	50.7577	188.247	DOCK4	0.2	1.61068
GO_Biological_Process_2021	negative regulation of leukocyte adhesion to vascular endothelial cell	1/5	0.0245084	0.182879	0	0	50.7577	188.247	CXCL12	0.2	1.61068
GO_Biological_Process_2021	cellular response to testosterone stimulus	1/5	0.0245084	0.182879	0	0	50.7577	188.247	SPP1	0.2	1.61068
KEGG_2021_Human	D-Glutamine and D-glutamate metabolism	1/5	0.0245084	0.16339	0	0	50.7577	188.247	GLS	0.2	1.61068
GO_Biological_Process_2021	Roundabout signaling pathway	1/5	0.0245084	0.182879	0	0	50.7577	188.247	SLIT2	0.2	1.61068
GO_Biological_Process_2021	salivary gland morphogenesis	1/5	0.0245084	0.182879	0	0	50.7577	188.247	FGFR2	0.2	1.61068
GO_Biological_Process_2021	positive regulation of protein kinase C activity	1/5	0.0245084	0.182879	0	0	50.7577	188.247	EGFR	0.2	1.61068
GO_Biological_Process_2021	mRNA cleavage	1/5	0.0245084	0.182879	0	0	50.7577	188.247	RNASE4	0.2	1.61068
GO_Biological_Process_2021	aminoglycan biosynthetic process	2/49	0.0245292	0.182879	0	0	8.7098	32.295	SDC1;HSPG2	0.0408163	1.61032
Reactome_2016	Phospholipase C-mediated cascade; FGFR2	2/49	0.0245292	0.0860793	0	0	8.7098	32.295	ITPR1;FGFR2	0.0408163	1.61032
GO_Biological_Process_2021	neuron migration	2/50	0.0254701	0.182879	0	0	8.52792	31.2996	SPOCK1;DCDC2	0.04	1.59397
Reactome_2016	Chondroitin sulfate/dermatan sulfate metabolism	2/50	0.0254701	0.0885611	0	0	8.52792	31.2996	SDC1;HSPG2	0.04	1.59397
GO_Biological_Process_2021	muscle contraction	3/129	0.0262592	0.182879	0	0	4.90451	17.8511	CALD1;VIM;SNTB1	0.0232558	1.58072
KEGG_2021_Human	Relaxin signaling pathway	3/129	0.0262592	0.168059	0	0	4.90451	17.8511	COL1A1;ARRB1;EGFR	0.0232558	1.58072
GO_Biological_Process_2021	positive regulation of actin filament bundle assembly	2/51	0.0264255	0.182879	0	0	8.35346	30.3517	LIMCH1;CCN2	0.0392157	1.57798
Reactome_2016	Ion homeostasis	2/51	0.0264255	0.0910478	0	0	8.35346	30.3517	CAMK2D;ITPR1	0.0392157	1.57798
GO_Biological_Process_2021	regulation of smoothened signaling pathway	2/51	0.0264255	0.182879	0	0	8.35346	30.3517	DCDC2;FGFR2	0.0392157	1.57798
GO_Biological_Process_2021	positive regulation of canonical Wnt signaling pathway	3/130	0.0267854	0.182879	0	0	4.86565	17.6132	COL1A1;EGFR;FGFR2	0.0230769	1.5721
GO_Biological_Process_2021	sprouting angiogenesis	2/52	0.0273953	0.182879	0	0	8.18598	29.4481	CCBE1;SLIT2	0.0384615	1.56232
KEGG_2021_Human	Dopaminergic synapse	3/132	0.0278546	0.168282	0	0	4.78973	17.1509	CAMK2D;ITPR1;ARRB1	0.0227273	1.5551
GO_Biological_Process_2021	cardiac muscle tissue development	2/53	0.0283793	0.182879	0	0	8.02507	28.5861	NOTCH2;ADAMTS9	0.0377358	1.547
GO_Biological_Process_2021	RNA metabolic process	3/133	0.0283976	0.182879	0	0	4.75264	16.9263	RBPMS;RNASE4;RNASE1	0.0225564	1.54672
KEGG_2021_Human	Vascular smooth muscle contraction	3/133	0.0283976	0.168282	0	0	4.75264	16.9263	CALD1;KCNMA1;ITPR1	0.0225564	1.54672
Reactome_2016	Signaling by the B Cell Receptor (BCR)	4/233	0.0286276	0.094752	0	0	3.61701	12.8526	ITPR1;PIP4K2A;EGFR;FGFR2	0.0171674	1.54321
GO_Biological_Process_2021	negative regulation of chemokine-mediated signaling pathway	1/6	0.0293383	0.182879	0	0	40.6041	143.286	SLIT2	0.166667	1.53256
GO_Biological_Process_2021	regulation of nitric oxide mediated signal transduction	1/6	0.0293383	0.182879	0	0	40.6041	143.286	EGFR	0.166667	1.53256
GO_Biological_Process_2021	contact inhibition	1/6	0.0293383	0.182879	0	0	40.6041	143.286	YAP1	0.166667	1.53256
GO_Biological_Process_2021	regulation of extracellular exosome assembly	1/6	0.0293383	0.182879	0	0	40.6041	143.286	SDC1	0.166667	1.53256
GO_Biological_Process_2021	epithelial tube branching involved in lung morphogenesis	1/6	0.0293383	0.182879	0	0	40.6041	143.286	FGFR2	0.166667	1.53256
GO_Biological_Process_2021	regulation of keratinocyte apoptotic process	1/6	0.0293383	0.182879	0	0	40.6041	143.286	ZFP36L1	0.166667	1.53256
GO_Biological_Process_2021	negative regulation of erythrocyte differentiation	1/6	0.0293383	0.182879	0	0	40.6041	143.286	ZFP36L1	0.166667	1.53256
GO_Biological_Process_2021	lipoxin metabolic process	1/6	0.0293383	0.182879	0	0	40.6041	143.286	LTC4S	0.166667	1.53256
GO_Biological_Process_2021	cellular hyperosmotic response	1/6	0.0293383	0.182879	0	0	40.6041	143.286	YBX3	0.166667	1.53256
GO_Biological_Process_2021	regulation of relaxation of cardiac muscle	1/6	0.0293383	0.182879	0	0	40.6041	143.286	CAMK2D	0.166667	1.53256
GO_Biological_Process_2021	aspartate metabolic process	1/6	0.0293383	0.182879	0	0	40.6041	143.286	ASS1	0.166667	1.53256
GO_Biological_Process_2021	bundle of His cell-Purkinje myocyte adhesion involved in cell communication	1/6	0.0293383	0.182879	0	0	40.6041	143.286	DSC2	0.166667	1.53256
GO_Biological_Process_2021	epithelial tube formation	1/6	0.0293383	0.182879	0	0	40.6041	143.286	FGFR2	0.166667	1.53256
GO_Biological_Process_2021	negative regulation of lamellipodium organization	1/6	0.0293383	0.182879	0	0	40.6041	143.286	SLIT2	0.166667	1.53256
GO_Biological_Process_2021	glandular epithelial cell differentiation	1/6	0.0293383	0.182879	0	0	40.6041	143.286	FGFR2	0.166667	1.53256
GO_Biological_Process_2021	response to heparin	1/6	0.0293383	0.182879	0	0	40.6041	143.286	SLIT2	0.166667	1.53256
GO_Biological_Process_2021	response to testosterone	1/6	0.0293383	0.182879	0	0	40.6041	143.286	SPP1	0.166667	1.53256
GO_Biological_Process_2021	retinal ganglion cell axon guidance	1/6	0.0293383	0.182879	0	0	40.6041	143.286	SLIT2	0.166667	1.53256
Reactome_2016	Synthesis of 5-eicosatetraenoic acids	1/6	0.0293383	0.094752	0	0	40.6041	143.286	LTC4S	0.166667	1.53256
GO_Biological_Process_2021	negative regulation of cellular extravasation	1/6	0.0293383	0.182879	0	0	40.6041	143.286	CXCL12	0.166667	1.53256
GO_Biological_Process_2021	negative regulation of monocyte chemotaxis	1/6	0.0293383	0.182879	0	0	40.6041	143.286	SLIT2	0.166667	1.53256
GO_Biological_Process_2021	positive regulation of vascular endothelial growth factor signaling pathway	1/6	0.0293383	0.182879	0	0	40.6041	143.286	CCBE1	0.166667	1.53256
GO_Biological_Process_2021	venous blood vessel morphogenesis	1/6	0.0293383	0.182879	0	0	40.6041	143.286	CCBE1	0.166667	1.53256
Reactome_2016	Fibronectin matrix formation	1/6	0.0293383	0.094752	0	0	40.6041	143.286	FN1	0.166667	1.53256
Reactome_2016	Pre-NOTCH Processing in the Endoplasmic Reticulum	1/6	0.0293383	0.094752	0	0	40.6041	143.286	NOTCH2	0.166667	1.53256
Reactome_2016	Synthesis of Lipoxins (LX)	1/6	0.0293383	0.094752	0	0	40.6041	143.286	LTC4S	0.166667	1.53256
Reactome_2016	Assembly of collagen fibrils and other multimeric structures	2/54	0.0293773	0.094752	0	0	7.87034	27.7629	COL1A1;COL5A2	0.037037	1.53199
Reactome_2016	Heparan sulfate/heparin (HS-GAG) metabolism	2/54	0.0293773	0.094752	0	0	7.87034	27.7629	SDC1;HSPG2	0.037037	1.53199
GO_Biological_Process_2021	glycosaminoglycan metabolic process	2/54	0.0293773	0.182879	0	0	7.87034	27.7629	SDC1;HSPG2	0.037037	1.53199
Reactome_2016	Cardiac conduction	3/135	0.0295006	0.094752	0	0	4.68016	16.4898	WWTR1;CAMK2D;ITPR1	0.0222222	1.53017
GO_Biological_Process_2021	cellular calcium ion homeostasis	3/136	0.0300605	0.182879	0	0	4.64474	16.2777	CAMK2D;CXCL12;RGN	0.0220588	1.522
GO_Biological_Process_2021	positive regulation of cell population proliferation	6/474	0.0303783	0.182879	0	0	2.67894	9.36027	YAP1;WWTR1;CCND2;FN1;EGFR;FGFR2	0.0126582	1.51744
GO_Biological_Process_2021	triglyceride metabolic process	2/55	0.0303893	0.182879	0	0	7.72145	26.9762	PNLIPRP2;FABP3	0.0363636	1.51728
GO_Biological_Process_2021	peptidyl-tyrosine modification	2/56	0.0314149	0.182879	0	0	7.57808	26.2237	EGFR;FGFR2	0.0357143	1.50286
GO_Biological_Process_2021	glycosaminoglycan catabolic process	2/56	0.0314149	0.182879	0	0	7.57808	26.2237	SDC1;HSPG2	0.0357143	1.50286
KEGG_2021_Human	Hedgehog signaling pathway	2/56	0.0314149	0.1734	0	0	7.57808	26.2237	CCND2;ARRB1	0.0357143	1.50286
KEGG_2021_Human	Calcium signaling pathway	4/240	0.0314288	0.1734	0	0	3.50847	12.1394	CAMK2D;ITPR1;EGFR;FGFR2	0.0166667	1.50267
GO_Biological_Process_2021	axonogenesis	4/240	0.0314288	0.182879	0	0	3.50847	12.1394	NOTCH2;CXCL12;SLIT2;FGFR2	0.0166667	1.50267
GO_Biological_Process_2021	icosanoid metabolic process	2/57	0.0324541	0.182879	0	0	7.43993	25.5035	CPA1;LTC4S	0.0350877	1.48873
GO_Biological_Process_2021	cellular response to peptide	2/57	0.0324541	0.182879	0	0	7.43993	25.5035	VIM;ZFP36L1	0.0350877	1.48873
GO_Biological_Process_2021	cellular response to cytokine stimulus	6/482	0.032578	0.182879	0	0	2.63283	9.01511	CXCL12;FN1;SDC1;VIM;YBX3;ZFP36L1	0.0124481	1.48708
GO_Biological_Process_2021	positive regulation of mitotic cell cycle phase transition	2/58	0.0335068	0.182879	0	0	7.3067	24.8136	CCND2;EGFR	0.0344828	1.47487
GO_Biological_Process_2021	chordate embryonic development	2/58	0.0335068	0.182879	0	0	7.3067	24.8136	COL1A1;FGFR2	0.0344828	1.47487
GO_Biological_Process_2021	nuclear-transcribed mRNA catabolic process, deadenylation-independent decay	1/7	0.0341445	0.182879	0	0	33.835	114.266	ZFP36L1	0.142857	1.46668
GO_Biological_Process_2021	regulation of relaxation of muscle	1/7	0.0341445	0.182879	0	0	33.835	114.266	CAMK2D	0.142857	1.46668
GO_Biological_Process_2021	negative regulation of cardiocyte differentiation	1/7	0.0341445	0.182879	0	0	33.835	114.266	EGFR	0.142857	1.46668
GO_Biological_Process_2021	negative regulation of cell cycle phase transition	1/7	0.0341445	0.182879	0	0	33.835	114.266	ZFP36L1	0.142857	1.46668
GO_Biological_Process_2021	aldehyde catabolic process	1/7	0.0341445	0.182879	0	0	33.835	114.266	HOGA1	0.142857	1.46668
GO_Biological_Process_2021	hyperosmotic response	1/7	0.0341445	0.182879	0	0	33.835	114.266	YBX3	0.142857	1.46668
GO_Biological_Process_2021	positive regulation of intracellular estrogen receptor signaling pathway	1/7	0.0341445	0.182879	0	0	33.835	114.266	YAP1	0.142857	1.46668
GO_Biological_Process_2021	positive regulation of histone H4 acetylation	1/7	0.0341445	0.182879	0	0	33.835	114.266	ARRB1	0.142857	1.46668
GO_Biological_Process_2021	gland morphogenesis	1/7	0.0341445	0.182879	0	0	33.835	114.266	FGFR2	0.142857	1.46668
GO_Biological_Process_2021	positive regulation of cytoplasmic translation	1/7	0.0341445	0.182879	0	0	33.835	114.266	YBX3	0.142857	1.46668
GO_Biological_Process_2021	G protein-coupled receptor internalization	1/7	0.0341445	0.182879	0	0	33.835	114.266	ARRB1	0.142857	1.46668
GO_Biological_Process_2021	regulation of smooth muscle cell differentiation	1/7	0.0341445	0.182879	0	0	33.835	114.266	FGFR2	0.142857	1.46668
GO_Biological_Process_2021	exocrine system development	1/7	0.0341445	0.182879	0	0	33.835	114.266	FGFR2	0.142857	1.46668
GO_Biological_Process_2021	negative regulation of dendritic cell apoptotic process	1/7	0.0341445	0.182879	0	0	33.835	114.266	CXCL12	0.142857	1.46668
GO_Biological_Process_2021	autophagosome membrane docking	1/7	0.0341445	0.182879	0	0	33.835	114.266	VMP1	0.142857	1.46668
GO_Biological_Process_2021	cellular response to laminar fluid shear stress	1/7	0.0341445	0.182879	0	0	33.835	114.266	ASS1	0.142857	1.46668
GO_Biological_Process_2021	regulation of histone deacetylase activity	1/7	0.0341445	0.182879	0	0	33.835	114.266	CAMK2D	0.142857	1.46668
GO_Biological_Process_2021	citrulline metabolic process	1/7	0.0341445	0.182879	0	0	33.835	114.266	ASS1	0.142857	1.46668
GO_Biological_Process_2021	collagen-activated tyrosine kinase receptor signaling pathway	1/7	0.0341445	0.182879	0	0	33.835	114.266	COL1A1	0.142857	1.46668
GO_Biological_Process_2021	cardiac muscle cell-cardiac muscle cell adhesion	1/7	0.0341445	0.182879	0	0	33.835	114.266	DSC2	0.142857	1.46668
GO_Biological_Process_2021	smooth muscle cell migration	1/7	0.0341445	0.182879	0	0	33.835	114.266	PLAT	0.142857	1.46668
GO_Biological_Process_2021	mitochondrion-endoplasmic reticulum membrane tethering	1/7	0.0341445	0.182879	0	0	33.835	114.266	VMP1	0.142857	1.46668
Reactome_2016	PTK6 promotes HIF1A stabilization	1/7	0.0341445	0.108746	0	0	33.835	114.266	EGFR	0.142857	1.46668
GO_Biological_Process_2021	marginal zone B cell differentiation	1/7	0.0341445	0.182879	0	0	33.835	114.266	NOTCH2	0.142857	1.46668
GO_Biological_Process_2021	maintenance of protein location in extracellular region	1/7	0.0341445	0.182879	0	0	33.835	114.266	FBN2	0.142857	1.46668
GO_Biological_Process_2021	lipoxin biosynthetic process	1/7	0.0341445	0.182879	0	0	33.835	114.266	LTC4S	0.142857	1.46668
GO_Biological_Process_2021	positive regulation of phospholipid biosynthetic process	1/7	0.0341445	0.182879	0	0	33.835	114.266	FABP3	0.142857	1.46668
GO_Biological_Process_2021	skin morphogenesis	1/7	0.0341445	0.182879	0	0	33.835	114.266	COL1A1	0.142857	1.46668
GO_Biological_Process_2021	regulation of cell population proliferation	8/764	0.0357071	0.183696	0	0	2.22629	7.41891	YAP1;WWTR1;FABP3;CCND2;FN1;EGFR;FGFR2;ZFP36L1	0.0104712	1.44725
GO_Biological_Process_2021	positive regulation of signal transduction	4/252	0.0365951	0.183696	0	0	3.33667	11.0372	YAP1;CCBE1;DCDC2;FGFR2	0.015873	1.43658
Reactome_2016	Constitutive Signaling by Aberrant PI3K in Cancer	2/61	0.0367436	0.116049	0	0	6.93413	22.9089	EGFR;FGFR2	0.0327869	1.43482
KEGG_2021_Human	Glycerolipid metabolism	2/61	0.0367436	0.195966	0	0	6.93413	22.9089	PNLIPRP1;PNLIPRP2	0.0327869	1.43482
Reactome_2016	Metabolism of vitamins and cofactors	3/148	0.0372152	0.116567	0	0	4.25776	14.0124	CLPS;SDC1;HSPG2	0.0202703	1.42928
Reactome_2016	FCERI mediated Ca+2 mobilization	2/62	0.0378484	0.117578	0	0	6.81821	22.324	VAV3;ITPR1	0.0322581	1.42195
GO_Biological_Process_2021	brain development	3/150	0.0384853	0.183696	0	0	4.1994	13.6795	NFIB;PBX3;HSPG2	0.02	1.41471
GO_Biological_Process_2021	regulation of chemokine-mediated signaling pathway	1/8	0.0389272	0.183696	0	0	29	94.1358	SLIT2	0.125	1.40975
GO_Biological_Process_2021	regulation of cardiac muscle cell action potential involved in regulation of contraction	1/8	0.0389272	0.183696	0	0	29	94.1358	CAMK2D	0.125	1.40975
GO_Biological_Process_2021	negative regulation of keratinocyte proliferation	1/8	0.0389272	0.183696	0	0	29	94.1358	FGFR2	0.125	1.40975
GO_Biological_Process_2021	neuron projection extension involved in neuron projection guidance	1/8	0.0389272	0.183696	0	0	29	94.1358	SLIT2	0.125	1.40975
GO_Biological_Process_2021	negative regulation of lipid kinase activity	1/8	0.0389272	0.183696	0	0	29	94.1358	PIP4K2A	0.125	1.40975
GO_Biological_Process_2021	commissural neuron axon guidance	1/8	0.0389272	0.183696	0	0	29	94.1358	NFIB	0.125	1.40975
GO_Biological_Process_2021	negative regulation of sodium ion transport	1/8	0.0389272	0.183696	0	0	29	94.1358	CAMK2D	0.125	1.40975
GO_Biological_Process_2021	autophagosome-lysosome fusion	1/8	0.0389272	0.183696	0	0	29	94.1358	PIP4K2A	0.125	1.40975
GO_Biological_Process_2021	negative regulation of response to reactive oxygen species	1/8	0.0389272	0.183696	0	0	29	94.1358	GPR37	0.125	1.40975
GO_Biological_Process_2021	axon extension involved in axon guidance	1/8	0.0389272	0.183696	0	0	29	94.1358	SLIT2	0.125	1.40975
GO_Biological_Process_2021	glyoxylate metabolic process	1/8	0.0389272	0.183696	0	0	29	94.1358	HOGA1	0.125	1.40975
GO_Biological_Process_2021	regulation of ATPase-coupled calcium transmembrane transporter activity	1/8	0.0389272	0.183696	0	0	29	94.1358	VMP1	0.125	1.40975
GO_Biological_Process_2021	regulation of actin filament length	1/8	0.0389272	0.183696	0	0	29	94.1358	CXCL12	0.125	1.40975
GO_Biological_Process_2021	protein retention in ER lumen	1/8	0.0389272	0.183696	0	0	29	94.1358	PDIA2	0.125	1.40975
GO_Biological_Process_2021	forebrain neuron development	1/8	0.0389272	0.183696	0	0	29	94.1358	FGFR2	0.125	1.40975
GO_Biological_Process_2021	positive regulation of intracellular steroid hormone receptor signaling pathway	1/8	0.0389272	0.183696	0	0	29	94.1358	YAP1	0.125	1.40975
GO_Biological_Process_2021	positive regulation of vascular associated smooth muscle cell migration	1/8	0.0389272	0.183696	0	0	29	94.1358	DOCK4	0.125	1.40975
GO_Biological_Process_2021	venous blood vessel development	1/8	0.0389272	0.183696	0	0	29	94.1358	CCBE1	0.125	1.40975
GO_Biological_Process_2021	progesterone receptor signaling pathway	1/8	0.0389272	0.183696	0	0	29	94.1358	YAP1	0.125	1.40975
GO_Biological_Process_2021	regulation of osteoclast development	1/8	0.0389272	0.183696	0	0	29	94.1358	NOTCH2	0.125	1.40975
GO_Biological_Process_2021	negative regulation of endopeptidase activity	2/63	0.0389658	0.183696	0	0	6.7061	21.7618	SERPINI2;SPOCK1	0.031746	1.40932
GO_Biological_Process_2021	positive regulation of Ras protein signal transduction	2/63	0.0389658	0.183696	0	0	6.7061	21.7618	NOTCH2;ARRB1	0.031746	1.40932
GO_Biological_Process_2021	negative regulation of peptidase activity	2/63	0.0389658	0.183696	0	0	6.7061	21.7618	SERPINI2;SPOCK1	0.031746	1.40932
Reactome_2016	Collagen biosynthesis and modifying enzymes	2/63	0.0389658	0.120065	0	0	6.7061	21.7618	COL1A1;COL5A2	0.031746	1.40932
GO_Biological_Process_2021	negative regulation of intrinsic apoptotic signaling pathway	2/64	0.0400957	0.184751	0	0	6.59761	21.2211	CXCL12;YBX3	0.03125	1.3969
GO_Biological_Process_2021	regulation of cilium assembly	2/64	0.0400957	0.184751	0	0	6.59761	21.2211	YAP1;DCDC2	0.03125	1.3969
GO_Biological_Process_2021	positive regulation of Wnt signaling pathway	3/153	0.0404316	0.184751	0	0	4.11479	13.2008	COL1A1;EGFR;FGFR2	0.0196078	1.39328
GO_Biological_Process_2021	cellular component assembly	4/261	0.0407737	0.184751	0	0	3.21835	10.2978	YAP1;MAGI1;VMP1;CALD1	0.0153257	1.38962
KEGG_2021_Human	Oxytocin signaling pathway	3/154	0.0410912	0.204983	0	0	4.08733	13.0466	CAMK2D;ITPR1;EGFR	0.0194805	1.38625
GO_Biological_Process_2021	positive regulation of nucleic acid-templated transcription	6/511	0.0414144	0.184751	0	0	2.47793	7.89005	COL1A1;YAP1;NFIB;SPP1;EGFR;NPAS3	0.0117417	1.38285
KEGG_2021_Human	Cushing syndrome	3/155	0.0417564	0.204983	0	0	4.06024	12.8949	CAMK2D;ITPR1;EGFR	0.0193548	1.37928
GO_Biological_Process_2021	embryonic organ development	2/66	0.0423924	0.184751	0	0	6.39079	20.1999	PBX3;FGFR2	0.030303	1.37271
KEGG_2021_Human	Cellular senescence	3/156	0.0424269	0.204983	0	0	4.0335	12.7457	CCND2;ITPR1;ZFP36L1	0.0192308	1.37236
GO_Biological_Process_2021	regulation of cell differentiation	3/156	0.0424269	0.184751	0	0	4.0335	12.7457	CCN2;FGFR2;ZFP36L1	0.0192308	1.37236
KEGG_2021_Human	Long-term potentiation	2/67	0.0435589	0.204983	0	0	6.29215	19.7173	CAMK2D;ITPR1	0.0298507	1.36092
GO_Biological_Process_2021	positive regulation of autophagosome assembly	1/9	0.0436864	0.184751	0	0	25.3737	79.438	PIP4K2A	0.111111	1.35965
GO_Biological_Process_2021	cellular response to muramyl dipeptide	1/9	0.0436864	0.184751	0	0	25.3737	79.438	VIM	0.111111	1.35965
Reactome_2016	Role of Abl in Robo-Slit signaling	1/9	0.0436864	0.12835	0	0	25.3737	79.438	SLIT2	0.111111	1.35965
GO_Biological_Process_2021	collagen-activated signaling pathway	1/9	0.0436864	0.184751	0	0	25.3737	79.438	COL1A1	0.111111	1.35965
GO_Biological_Process_2021	regulation of PERK-mediated unfolded protein response	1/9	0.0436864	0.184751	0	0	25.3737	79.438	PPP1R15A	0.111111	1.35965
GO_Biological_Process_2021	embryonic digestive tract morphogenesis	1/9	0.0436864	0.184751	0	0	25.3737	79.438	FGFR2	0.111111	1.35965
GO_Biological_Process_2021	actin-mediated cell contraction	1/9	0.0436864	0.184751	0	0	25.3737	79.438	CAMK2D	0.111111	1.35965
GO_Biological_Process_2021	regulation of actin filament organization	1/9	0.0436864	0.184751	0	0	25.3737	79.438	CXCL12	0.111111	1.35965
GO_Biological_Process_2021	bundle of His cell to Purkinje myocyte communication	1/9	0.0436864	0.184751	0	0	25.3737	79.438	DSC2	0.111111	1.35965
GO_Biological_Process_2021	negative regulation of necroptotic process	1/9	0.0436864	0.184751	0	0	25.3737	79.438	YBX3	0.111111	1.35965
Reactome_2016	Alpha-defensins	1/9	0.0436864	0.12835	0	0	25.3737	79.438	PRSS2	0.111111	1.35965
Reactome_2016	Ca2+ activated K+ channels	1/9	0.0436864	0.12835	0	0	25.3737	79.438	KCNMA1	0.111111	1.35965
GO_Biological_Process_2021	estrogen biosynthetic process	1/9	0.0436864	0.184751	0	0	25.3737	79.438	HSD17B2	0.111111	1.35965
GO_Biological_Process_2021	regulation of histone H4 acetylation	1/9	0.0436864	0.184751	0	0	25.3737	79.438	ARRB1	0.111111	1.35965
Reactome_2016	A third proteolytic cleavage releases NICD	1/9	0.0436864	0.12835	0	0	25.3737	79.438	NOTCH2	0.111111	1.35965
Reactome_2016	Inactivation of Cdc42 and Rac	1/9	0.0436864	0.12835	0	0	25.3737	79.438	SLIT2	0.111111	1.35965
GO_Biological_Process_2021	plasminogen activation	1/9	0.0436864	0.184751	0	0	25.3737	79.438	PLAT	0.111111	1.35965
GO_Biological_Process_2021	L-ascorbic acid metabolic process	1/9	0.0436864	0.184751	0	0	25.3737	79.438	RGN	0.111111	1.35965
GO_Biological_Process_2021	sensory organ morphogenesis	1/9	0.0436864	0.184751	0	0	25.3737	79.438	COL5A2	0.111111	1.35965
GO_Biological_Process_2021	intestinal epithelial cell differentiation	1/9	0.0436864	0.184751	0	0	25.3737	79.438	YAP1	0.111111	1.35965
GO_Biological_Process_2021	response to vitamin D	1/9	0.0436864	0.184751	0	0	25.3737	79.438	SPP1	0.111111	1.35965
GO_Biological_Process_2021	response to vitamin	1/9	0.0436864	0.184751	0	0	25.3737	79.438	SPP1	0.111111	1.35965
Reactome_2016	EGFR Transactivation by Gastrin	1/9	0.0436864	0.12835	0	0	25.3737	79.438	EGFR	0.111111	1.35965
GO_Biological_Process_2021	protein-containing complex assembly	4/267	0.0437044	0.184751	0	0	3.14397	9.84157	YAP1;MAGI1;CXCL12;FN1	0.0149813	1.35947
GO_Biological_Process_2021	central nervous system development	4/268	0.0442042	0.184836	0	0	3.1319	9.76819	NFIB;PBX3;SPOCK1;HSPG2	0.0149254	1.35454
GO_Biological_Process_2021	protein autophosphorylation	3/159	0.0444711	0.184836	0	0	3.95533	12.3126	CAMK2D;EGFR;FGFR2	0.0188679	1.35192
GO_Biological_Process_2021	positive regulation of cell migration	4/269	0.0447072	0.184836	0	0	3.11992	9.69553	COL1A1;CXCL12;FN1;EGFR	0.0148699	1.34962
Reactome_2016	Amyloid fiber formation	2/68	0.0447373	0.130426	0	0	6.1965	19.2522	HSPG2;HIST1H2BD	0.0294118	1.34933
GO_Biological_Process_2021	positive regulation of protein localization to nucleus	2/68	0.0447373	0.184836	0	0	6.1965	19.2522	YAP1;WWTR1	0.0294118	1.34933
Reactome_2016	Signaling by Interleukins	5/392	0.0452799	0.131001	0	0	2.68212	8.30086	CAMK2D;FN1;ARRB1;EGFR;FGFR2	0.0127551	1.34409
GO_Biological_Process_2021	peptidyl-tyrosine phosphorylation	2/69	0.0459275	0.184836	0	0	6.10371	18.8036	EGFR;FGFR2	0.0289855	1.33793
GO_Biological_Process_2021	cell chemotaxis	2/69	0.0459275	0.184836	0	0	6.10371	18.8036	DOCK4;CXCL12	0.0289855	1.33793
KEGG_2021_Human	Renin secretion	2/69	0.0459275	0.209954	0	0	6.10371	18.8036	KCNMA1;ITPR1	0.0289855	1.33793
Reactome_2016	Role of LAT2/NTAL/LAB on calcium mobilization	3/162	0.0465638	0.133694	0	0	3.88011	11.9	PIP4K2A;EGFR;FGFR2	0.0185185	1.33195
Reactome_2016	Metabolism	15/1908	0.0481731	0.135941	0	0	1.69874	5.1522	YAP1;PNLIPRP1;WWTR1;PNLIPRP2;NQO1;GPT2;ITPR1;LTC4S;HSPG2;ASS1;GLS;FABP3;CLPS;PIP4K2A;SDC1	0.00786164	1.3172
GO_Biological_Process_2021	regulation of G1/S transition of mitotic cell cycle	2/71	0.0483426	0.184836	0	0	5.92619	17.9531	CCND2;EGFR	0.028169	1.31567
GO_Biological_Process_2021	positive regulation of cellular protein localization	2/71	0.0483426	0.184836	0	0	5.92619	17.9531	YAP1;WWTR1	0.028169	1.31567
GO_Biological_Process_2021	regulation of endopeptidase activity	2/71	0.0483426	0.184836	0	0	5.92619	17.9531	SERPINI2;SPOCK1	0.028169	1.31567
GO_Biological_Process_2021	regulation of hydrogen peroxide-induced cell death	1/10	0.0484222	0.184836	0	0	22.5533	68.2868	GPR37	0.1	1.31496
GO_Biological_Process_2021	negative regulation of transforming growth factor beta production	1/10	0.0484222	0.184836	0	0	22.5533	68.2868	FN1	0.1	1.31496
GO_Biological_Process_2021	phosphatidylcholine catabolic process	1/10	0.0484222	0.184836	0	0	22.5533	68.2868	PNLIPRP2	0.1	1.31496
GO_Biological_Process_2021	regulation of leukocyte tethering or rolling	1/10	0.0484222	0.184836	0	0	22.5533	68.2868	CXCL12	0.1	1.31496
GO_Biological_Process_2021	dicarboxylic acid biosynthetic process	1/10	0.0484222	0.184836	0	0	22.5533	68.2868	GLS	0.1	1.31496
GO_Biological_Process_2021	negative regulation of sodium ion transmembrane transport	1/10	0.0484222	0.184836	0	0	22.5533	68.2868	CAMK2D	0.1	1.31496
GO_Biological_Process_2021	regulation of postsynaptic neurotransmitter receptor activity	1/10	0.0484222	0.184836	0	0	22.5533	68.2868	NPTX2	0.1	1.31496
GO_Biological_Process_2021	response to laminar fluid shear stress	1/10	0.0484222	0.184836	0	0	22.5533	68.2868	ASS1	0.1	1.31496
GO_Biological_Process_2021	positive regulation of lipase activity	1/10	0.0484222	0.184836	0	0	22.5533	68.2868	FGFR2	0.1	1.31496
GO_Biological_Process_2021	positive regulation of mesenchymal cell proliferation	1/10	0.0484222	0.184836	0	0	22.5533	68.2868	FGFR2	0.1	1.31496
GO_Biological_Process_2021	positive regulation of monocyte differentiation	1/10	0.0484222	0.184836	0	0	22.5533	68.2868	ZFP36L1	0.1	1.31496
GO_Biological_Process_2021	urea cycle	1/10	0.0484222	0.184836	0	0	22.5533	68.2868	ASS1	0.1	1.31496
GO_Biological_Process_2021	muscle cell migration	1/10	0.0484222	0.184836	0	0	22.5533	68.2868	PLAT	0.1	1.31496
GO_Biological_Process_2021	negative regulation of sodium ion transmembrane transporter activity	1/10	0.0484222	0.184836	0	0	22.5533	68.2868	CAMK2D	0.1	1.31496
GO_Biological_Process_2021	lipoprotein transport	1/10	0.0484222	0.184836	0	0	22.5533	68.2868	VMP1	0.1	1.31496
GO_Biological_Process_2021	negative regulation of leukocyte migration	1/10	0.0484222	0.184836	0	0	22.5533	68.2868	SLIT2	0.1	1.31496
GO_Biological_Process_2021	arginine metabolic process	1/10	0.0484222	0.184836	0	0	22.5533	68.2868	ASS1	0.1	1.31496
Reactome_2016	FGFR2b ligand binding and activation	1/10	0.0484222	0.135941	0	0	22.5533	68.2868	FGFR2	0.1	1.31496
Reactome_2016	Urea cycle	1/10	0.0484222	0.135941	0	0	22.5533	68.2868	ASS1	0.1	1.31496
GO_Biological_Process_2021	cell junction organization	2/72	0.0495672	0.186607	0	0	5.84124	17.5496	VMP1;SNCG	0.0277778	1.30481
GO_Biological_Process_2021	transmembrane receptor protein tyrosine kinase signaling pathway	5/404	0.0503511	0.186607	0	0	2.59985	7.77026	COL1A1;VAV3;PLAT;EGFR;FGFR2	0.0123762	1.29799
KEGG_2021_Human	Tight junction	3/169	0.0516329	0.223903	0	0	3.71517	11.0103	MAGI1;AMOTL1;YBX3	0.0177515	1.28707
Reactome_2016	Binding and Uptake of Ligands by Scavenger Receptors	2/74	0.05205	0.145051	0	0	5.67841	16.7828	COL1A1;SPARC	0.027027	1.28358
GO_Biological_Process_2021	regulation of stress fiber assembly	2/74	0.05205	0.186607	0	0	5.67841	16.7828	LIMCH1;CCN2	0.027027	1.28358
GO_Biological_Process_2021	embryonic eye morphogenesis	1/11	0.0531349	0.186607	0	0	20.2969	59.5699	FBN2	0.0909091	1.27462
GO_Biological_Process_2021	positive regulation of bone resorption	1/11	0.0531349	0.186607	0	0	20.2969	59.5699	SPP1	0.0909091	1.27462
GO_Biological_Process_2021	positive regulation of keratinocyte proliferation	1/11	0.0531349	0.186607	0	0	20.2969	59.5699	NOTCH2	0.0909091	1.27462
GO_Biological_Process_2021	induction of positive chemotaxis	1/11	0.0531349	0.186607	0	0	20.2969	59.5699	CXCL12	0.0909091	1.27462
GO_Biological_Process_2021	positive regulation of production of miRNAs involved in gene silencing by miRNA	1/11	0.0531349	0.186607	0	0	20.2969	59.5699	EGFR	0.0909091	1.27462
GO_Biological_Process_2021	regulation of phospholipase activity	1/11	0.0531349	0.186607	0	0	20.2969	59.5699	FGFR2	0.0909091	1.27462
GO_Biological_Process_2021	organophosphate catabolic process	1/11	0.0531349	0.186607	0	0	20.2969	59.5699	PNLIPRP2	0.0909091	1.27462
GO_Biological_Process_2021	regulation of mRNA 3'-end processing	1/11	0.0531349	0.186607	0	0	20.2969	59.5699	ZFP36L1	0.0909091	1.27462
GO_Biological_Process_2021	desensitization of G protein-coupled receptor signaling pathway	1/11	0.0531349	0.186607	0	0	20.2969	59.5699	ARRB1	0.0909091	1.27462
GO_Biological_Process_2021	lipoprotein localization	1/11	0.0531349	0.186607	0	0	20.2969	59.5699	VMP1	0.0909091	1.27462
GO_Biological_Process_2021	positive regulation of vacuole organization	1/11	0.0531349	0.186607	0	0	20.2969	59.5699	PIP4K2A	0.0909091	1.27462
GO_Biological_Process_2021	negative regulation of sprouting angiogenesis	1/11	0.0531349	0.186607	0	0	20.2969	59.5699	ADAMTS9	0.0909091	1.27462
GO_Biological_Process_2021	atrial septum morphogenesis	1/11	0.0531349	0.186607	0	0	20.2969	59.5699	NOTCH2	0.0909091	1.27462
KEGG_2021_Human	Ubiquinone and other terpenoid-quinone biosynthesis	1/11	0.0531349	0.223903	0	0	20.2969	59.5699	NQO1	0.0909091	1.27462
GO_Biological_Process_2021	regulation of calcium ion transmembrane transport via high voltage-gated calcium channel	1/11	0.0531349	0.186607	0	0	20.2969	59.5699	CAMK2D	0.0909091	1.27462
GO_Biological_Process_2021	Notch signaling involved in heart development	1/11	0.0531349	0.186607	0	0	20.2969	59.5699	NOTCH2	0.0909091	1.27462
GO_Biological_Process_2021	regulation of mesenchymal cell proliferation	1/11	0.0531349	0.186607	0	0	20.2969	59.5699	FGFR2	0.0909091	1.27462
Reactome_2016	CLEC7A (Dectin-1) induces NFAT activation	1/11	0.0531349	0.146994	0	0	20.2969	59.5699	ITPR1	0.0909091	1.27462
GO_Biological_Process_2021	regulation of cardiac muscle cell apoptotic process	1/11	0.0531349	0.186607	0	0	20.2969	59.5699	CAMK2D	0.0909091	1.27462
GO_Biological_Process_2021	negative regulation of programmed necrotic cell death	1/11	0.0531349	0.186607	0	0	20.2969	59.5699	YBX3	0.0909091	1.27462
GO_Biological_Process_2021	regulation of dendritic cell apoptotic process	1/11	0.0531349	0.186607	0	0	20.2969	59.5699	CXCL12	0.0909091	1.27462
KEGG_2021_Human	Glioma	2/75	0.0533078	0.223903	0	0	5.60034	16.4184	CAMK2D;EGFR	0.0266667	1.27321
GO_Biological_Process_2021	nucleic acid phosphodiester bond hydrolysis	2/75	0.0533078	0.186607	0	0	5.60034	16.4184	RNASE4;RNASE1	0.0266667	1.27321
GO_Biological_Process_2021	positive regulation of programmed cell death	4/286	0.0537501	0.186607	0	0	2.9293	8.56355	VAV3;ADAMTSL4;KCNMA1;SLIT2	0.013986	1.26962
GO_Biological_Process_2021	proteolysis	4/287	0.0543109	0.186607	0	0	2.9188	8.50256	CPA1;PLAT;PRSS2;ADAMTS9	0.0139373	1.26511
GO_Biological_Process_2021	cellular response to hormone stimulus	2/76	0.0545764	0.186607	0	0	5.52438	16.0657	SLIT2;ZFP36L1	0.0263158	1.26299
GO_Biological_Process_2021	regulation of epithelial to mesenchymal transition	2/76	0.0545764	0.186607	0	0	5.52438	16.0657	COL1A1;WWTR1	0.0263158	1.26299
GO_Biological_Process_2021	positive regulation of growth	2/76	0.0545764	0.186607	0	0	5.52438	16.0657	PRSS2;EGFR	0.0263158	1.26299
KEGG_2021_Human	Gastric acid secretion	2/76	0.0545764	0.223903	0	0	5.52438	16.0657	CAMK2D;ITPR1	0.0263158	1.26299
GO_Biological_Process_2021	phospholipid metabolic process	2/76	0.0545764	0.186607	0	0	5.52438	16.0657	PNLIPRP2;PIP4K2A	0.0263158	1.26299
GO_Biological_Process_2021	regulation of cell division	2/76	0.0545764	0.186607	0	0	5.52438	16.0657	TXNIP;FGFR2	0.0263158	1.26299
GO_Biological_Process_2021	cell morphogenesis involved in neuron differentiation	2/76	0.0545764	0.186607	0	0	5.52438	16.0657	DCDC2;FGFR2	0.0263158	1.26299
Reactome_2016	Signaling by GPCR	11/1293	0.0546888	0.150196	0	0	1.81543	5.2758	VAV3;CAMK2D;CXCL12;GPR37;PENK;PPY;FN1;ITPR1;ARRB1;EGFR;FGFR2	0.00850735	1.2621
GO_Biological_Process_2021	negative regulation of blood vessel morphogenesis	2/78	0.0571455	0.186607	0	0	5.37846	15.394	SPARC;HSPG2	0.025641	1.24302
Reactome_2016	Physiological factors	1/12	0.0578244	0.153255	0	0	18.4508	52.5912	WWTR1	0.0833333	1.23789
Reactome_2016	The NLRP3 inflammasome	1/12	0.0578244	0.153255	0	0	18.4508	52.5912	TXNIP	0.0833333	1.23789
GO_Biological_Process_2021	tricarboxylic acid metabolic process	1/12	0.0578244	0.186607	0	0	18.4508	52.5912	ASS1	0.0833333	1.23789
GO_Biological_Process_2021	melanocyte differentiation	1/12	0.0578244	0.186607	0	0	18.4508	52.5912	LRMDA	0.0833333	1.23789
GO_Biological_Process_2021	maintenance of protein localization in endoplasmic reticulum	1/12	0.0578244	0.186607	0	0	18.4508	52.5912	PDIA2	0.0833333	1.23789
GO_Biological_Process_2021	positive regulation of protein maturation	1/12	0.0578244	0.186607	0	0	18.4508	52.5912	CCBE1	0.0833333	1.23789
GO_Biological_Process_2021	regulation of ventricular cardiac muscle cell action potential	1/12	0.0578244	0.186607	0	0	18.4508	52.5912	DSC2	0.0833333	1.23789
GO_Biological_Process_2021	glutamine metabolic process	1/12	0.0578244	0.186607	0	0	18.4508	52.5912	GLS	0.0833333	1.23789
GO_Biological_Process_2021	regulation of vascular associated smooth muscle cell migration	1/12	0.0578244	0.186607	0	0	18.4508	52.5912	DOCK4	0.0833333	1.23789
GO_Biological_Process_2021	phospholipid homeostasis	1/12	0.0578244	0.186607	0	0	18.4508	52.5912	FABP3	0.0833333	1.23789
GO_Biological_Process_2021	digestive system development	1/12	0.0578244	0.186607	0	0	18.4508	52.5912	FGFR2	0.0833333	1.23789
GO_Biological_Process_2021	regulation of leukocyte cell-cell adhesion	1/12	0.0578244	0.186607	0	0	18.4508	52.5912	ASS1	0.0833333	1.23789
GO_Biological_Process_2021	negative regulation of vascular permeability	1/12	0.0578244	0.186607	0	0	18.4508	52.5912	SLIT2	0.0833333	1.23789
GO_Biological_Process_2021	cellular response to fluid shear stress	1/12	0.0578244	0.186607	0	0	18.4508	52.5912	ASS1	0.0833333	1.23789
GO_Biological_Process_2021	negative regulation of leukocyte chemotaxis	1/12	0.0578244	0.186607	0	0	18.4508	52.5912	SLIT2	0.0833333	1.23789
GO_Biological_Process_2021	negative regulation of leukocyte apoptotic process	1/12	0.0578244	0.186607	0	0	18.4508	52.5912	CXCL12	0.0833333	1.23789
GO_Biological_Process_2021	regulation of cell communication by electrical coupling involved in cardiac conduction	1/12	0.0578244	0.186607	0	0	18.4508	52.5912	CAMK2D	0.0833333	1.23789
GO_Biological_Process_2021	negative regulation of cilium assembly	1/12	0.0578244	0.186607	0	0	18.4508	52.5912	YAP1	0.0833333	1.23789
GO_Biological_Process_2021	negative regulation of cell division	1/12	0.0578244	0.186607	0	0	18.4508	52.5912	TXNIP	0.0833333	1.23789
Reactome_2016	Passive transport by Aquaporins	1/12	0.0578244	0.153255	0	0	18.4508	52.5912	AQP8	0.0833333	1.23789
Reactome_2016	Caspase-mediated cleavage of cytoskeletal proteins	1/12	0.0578244	0.153255	0	0	18.4508	52.5912	VIM	0.0833333	1.23789
Reactome_2016	NOTCH2 intracellular domain regulates transcription	1/12	0.0578244	0.153255	0	0	18.4508	52.5912	NOTCH2	0.0833333	1.23789
GO_Biological_Process_2021	regulation of cyclin-dependent protein serine/threonine kinase activity	2/82	0.0624073	0.193722	0	0	5.10851	14.1714	CCND2;EGFR	0.0243902	1.20476
GO_Biological_Process_2021	cellular potassium ion homeostasis	1/13	0.062491	0.193722	0	0	16.9124	46.8936	KCNMA1	0.0769231	1.20418
GO_Biological_Process_2021	negative regulation of endoplasmic reticulum unfolded protein response	1/13	0.062491	0.193722	0	0	16.9124	46.8936	PPP1R15A	0.0769231	1.20418
GO_Biological_Process_2021	mature B cell differentiation involved in immune response	1/13	0.062491	0.193722	0	0	16.9124	46.8936	NOTCH2	0.0769231	1.20418
GO_Biological_Process_2021	positive regulation of lipid transport	1/13	0.062491	0.193722	0	0	16.9124	46.8936	SPP1	0.0769231	1.20418
GO_Biological_Process_2021	response to muramyl dipeptide	1/13	0.062491	0.193722	0	0	16.9124	46.8936	VIM	0.0769231	1.20418
GO_Biological_Process_2021	relaxation of cardiac muscle	1/13	0.062491	0.193722	0	0	16.9124	46.8936	CAMK2D	0.0769231	1.20418
GO_Biological_Process_2021	positive regulation of calcium ion import	1/13	0.062491	0.193722	0	0	16.9124	46.8936	CXCL12	0.0769231	1.20418
GO_Biological_Process_2021	central nervous system projection neuron axonogenesis	1/13	0.062491	0.193722	0	0	16.9124	46.8936	NFIB	0.0769231	1.20418
GO_Biological_Process_2021	negative regulation of mononuclear cell migration	1/13	0.062491	0.193722	0	0	16.9124	46.8936	SLIT2	0.0769231	1.20418
GO_Biological_Process_2021	carboxylic acid biosynthetic process	1/13	0.062491	0.193722	0	0	16.9124	46.8936	RGN	0.0769231	1.20418
GO_Biological_Process_2021	regulation of cell communication by electrical coupling	1/13	0.062491	0.193722	0	0	16.9124	46.8936	CAMK2D	0.0769231	1.20418
GO_Biological_Process_2021	negative regulation of hydrogen peroxide-induced cell death	1/13	0.062491	0.193722	0	0	16.9124	46.8936	GPR37	0.0769231	1.20418
Reactome_2016	NICD traffics to nucleus	1/13	0.062491	0.160028	0	0	16.9124	46.8936	NOTCH2	0.0769231	1.20418
Reactome_2016	Notch-HLH transcription pathway	1/13	0.062491	0.160028	0	0	16.9124	46.8936	NOTCH2	0.0769231	1.20418
Reactome_2016	Dissolution of Fibrin Clot	1/13	0.062491	0.160028	0	0	16.9124	46.8936	PLAT	0.0769231	1.20418
Reactome_2016	FGFR2c ligand binding and activation	1/13	0.062491	0.160028	0	0	16.9124	46.8936	FGFR2	0.0769231	1.20418
Reactome_2016	ERBB2 Activates PTK6 Signaling	1/13	0.062491	0.160028	0	0	16.9124	46.8936	EGFR	0.0769231	1.20418
Reactome_2016	Metabolism of polyamines	2/84	0.0650979	0.165585	0	0	4.9834	13.614	NQO1;ASS1	0.0238095	1.18643
GO_Biological_Process_2021	chemical synaptic transmission	4/306	0.065569	0.196787	0	0	2.73252	7.44517	NQO1;PENK;SNCG;NPTX2	0.0130719	1.1833
KEGG_2021_Human	ErbB signaling pathway	2/85	0.0664577	0.256704	0	0	4.92312	13.3475	CAMK2D;EGFR	0.0235294	1.17745
Reactome_2016	Collagen formation	2/85	0.0664577	0.165825	0	0	4.92312	13.3475	COL1A1;COL5A2	0.0235294	1.17745
GO_Biological_Process_2021	atrial septum development	1/14	0.0671347	0.196787	0	0	15.6107	42.1653	NOTCH2	0.0714286	1.17305
GO_Biological_Process_2021	regulation of histone deacetylation	1/14	0.0671347	0.196787	0	0	15.6107	42.1653	CAMK2D	0.0714286	1.17305
GO_Biological_Process_2021	positive regulation of cardiac muscle cell proliferation	1/14	0.0671347	0.196787	0	0	15.6107	42.1653	FGFR2	0.0714286	1.17305
GO_Biological_Process_2021	relaxation of muscle	1/14	0.0671347	0.196787	0	0	15.6107	42.1653	CAMK2D	0.0714286	1.17305
GO_Biological_Process_2021	response to chemokine	1/14	0.0671347	0.196787	0	0	15.6107	42.1653	CXCL12	0.0714286	1.17305
GO_Biological_Process_2021	negative regulation of pri-miRNA transcription by RNA polymerase II	1/14	0.0671347	0.196787	0	0	15.6107	42.1653	NFIB	0.0714286	1.17305
GO_Biological_Process_2021	bone morphogenesis	1/14	0.0671347	0.196787	0	0	15.6107	42.1653	FGFR2	0.0714286	1.17305
GO_Biological_Process_2021	T cell differentiation in thymus	1/14	0.0671347	0.196787	0	0	15.6107	42.1653	ZFP36L1	0.0714286	1.17305
GO_Biological_Process_2021	aorta development	1/14	0.0671347	0.196787	0	0	15.6107	42.1653	ADAMTS9	0.0714286	1.17305
GO_Biological_Process_2021	2-oxoglutarate metabolic process	1/14	0.0671347	0.196787	0	0	15.6107	42.1653	GPT2	0.0714286	1.17305
GO_Biological_Process_2021	positive regulation of lymphocyte migration	1/14	0.0671347	0.196787	0	0	15.6107	42.1653	CXCL12	0.0714286	1.17305
Reactome_2016	DCC mediated attractive signaling	1/14	0.0671347	0.165825	0	0	15.6107	42.1653	ABLIM1	0.0714286	1.17305
Reactome_2016	Activation of Rac	1/14	0.0671347	0.165825	0	0	15.6107	42.1653	SLIT2	0.0714286	1.17305
Reactome_2016	Receptor-ligand binding initiates the second proteolytic cleavage of Notch receptor	1/14	0.0671347	0.165825	0	0	15.6107	42.1653	NOTCH2	0.0714286	1.17305
GO_Biological_Process_2021	response to UV-A	1/14	0.0671347	0.196787	0	0	15.6107	42.1653	EGFR	0.0714286	1.17305
GO_Biological_Process_2021	negative regulation of smooth muscle cell migration	1/14	0.0671347	0.196787	0	0	15.6107	42.1653	SLIT2	0.0714286	1.17305
GO_Biological_Process_2021	sequestering of extracellular ligand from receptor	1/14	0.0671347	0.196787	0	0	15.6107	42.1653	FBN2	0.0714286	1.17305
GO_Biological_Process_2021	striated muscle cell development	1/14	0.0671347	0.196787	0	0	15.6107	42.1653	SDC1	0.0714286	1.17305
GO_Biological_Process_2021	positive regulation of SMAD protein signal transduction	1/14	0.0671347	0.196787	0	0	15.6107	42.1653	RBPMS	0.0714286	1.17305
GO_Biological_Process_2021	steroid catabolic process	1/14	0.0671347	0.196787	0	0	15.6107	42.1653	SPP1	0.0714286	1.17305
GO_Biological_Process_2021	vasodilation	1/14	0.0671347	0.196787	0	0	15.6107	42.1653	KCNMA1	0.0714286	1.17305
GO_Biological_Process_2021	positive regulation of transcription, DNA-templated	10/1183	0.0677686	0.197684	0	0	1.79392	4.82862	COL1A1;YAP1;WWTR1;NFIB;RASL11A;SPP1;ARRB1;EGFR;FGFR2;NPAS3	0.00845309	1.16897
KEGG_2021_Human	Insulin secretion	2/86	0.067827	0.256704	0	0	4.86426	13.0887	CAMK2D;KCNMA1	0.0232558	1.1686
GO_Biological_Process_2021	negative regulation of phosphorylation	2/86	0.067827	0.197684	0	0	4.86426	13.0887	WWTR1;SLIT2	0.0232558	1.1686
Reactome_2016	PI3K/AKT Signaling in Cancer	2/86	0.067827	0.165825	0	0	4.86426	13.0887	EGFR;FGFR2	0.0232558	1.1686
GO_Biological_Process_2021	positive regulation of apoptotic process	4/310	0.0680837	0.197868	0	0	2.69625	7.24487	VAV3;ADAMTSL4;KCNMA1;SLIT2	0.0129032	1.16696
Reactome_2016	Disease	7/725	0.0682106	0.165825	0	0	2.03284	5.45848	NOTCH2;ADAMTSL4;SDC1;HSPG2;ADAMTS9;EGFR;FGFR2	0.00965517	1.16615
Reactome_2016	Platelet homeostasis	2/87	0.0692056	0.165825	0	0	4.80679	12.8374	KCNMA1;ITPR1	0.0229885	1.15986
Reactome_2016	Downstream signaling events of B Cell Receptor (BCR)	3/192	0.0700636	0.165825	0	0	3.25926	8.66426	PIP4K2A;EGFR;FGFR2	0.015625	1.15451
KEGG_2021_Human	Chemokine signaling pathway	3/192	0.0700636	0.256704	0	0	3.25926	8.66426	VAV3;CXCL12;ARRB1	0.015625	1.15451
KEGG_2021_Human	Transcriptional misregulation in cancer	3/192	0.0700636	0.256704	0	0	3.25926	8.66426	CCND2;PBX3;PLAT	0.015625	1.15451
GO_Biological_Process_2021	sensory perception of mechanical stimulus	2/88	0.0705935	0.200016	0	0	4.75066	12.5931	COL1A1;DCDC2	0.0227273	1.15124
KEGG_2021_Human	Gap junction	2/88	0.0705935	0.256704	0	0	4.75066	12.5931	ITPR1;EGFR	0.0227273	1.15124
GO_Biological_Process_2021	nervous system development	5/447	0.071174	0.200016	0	0	2.34175	6.18837	YAP1;NOTCH2;WWTR1;FN1;SPOCK1	0.0111857	1.14768
Reactome_2016	Elevation of cytosolic Ca2+ levels	1/15	0.0717556	0.165825	0	0	14.4949	38.1867	ITPR1	0.0666667	1.14414
Reactome_2016	CREB phosphorylation through the activation of CaMKII	1/15	0.0717556	0.165825	0	0	14.4949	38.1867	CAMK2D	0.0666667	1.14414
Reactome_2016	p130Cas linkage to MAPK signaling for integrins	1/15	0.0717556	0.165825	0	0	14.4949	38.1867	FN1	0.0666667	1.14414
Reactome_2016	GRB2:SOS provides linkage to MAPK signaling for Integrins	1/15	0.0717556	0.165825	0	0	14.4949	38.1867	FN1	0.0666667	1.14414
Reactome_2016	ERBB2 Regulates Cell Motility	1/15	0.0717556	0.165825	0	0	14.4949	38.1867	EGFR	0.0666667	1.14414
Reactome_2016	Constitutive Signaling by EGFRvIII	1/15	0.0717556	0.165825	0	0	14.4949	38.1867	EGFR	0.0666667	1.14414
Reactome_2016	Signaling by EGFRvIII in Cancer	1/15	0.0717556	0.165825	0	0	14.4949	38.1867	EGFR	0.0666667	1.14414
GO_Biological_Process_2021	stress fiber assembly	1/15	0.0717556	0.200016	0	0	14.4949	38.1867	ARRB1	0.0666667	1.14414
GO_Biological_Process_2021	icosanoid biosynthetic process	1/15	0.0717556	0.200016	0	0	14.4949	38.1867	LTC4S	0.0666667	1.14414
GO_Biological_Process_2021	embryonic cranial skeleton morphogenesis	1/15	0.0717556	0.200016	0	0	14.4949	38.1867	FGFR2	0.0666667	1.14414
GO_Biological_Process_2021	regulation of cytoplasmic translation	1/15	0.0717556	0.200016	0	0	14.4949	38.1867	YBX3	0.0666667	1.14414
GO_Biological_Process_2021	nitric oxide biosynthetic process	1/15	0.0717556	0.200016	0	0	14.4949	38.1867	NQO1	0.0666667	1.14414
GO_Biological_Process_2021	contractile actin filament bundle assembly	1/15	0.0717556	0.200016	0	0	14.4949	38.1867	ARRB1	0.0666667	1.14414
GO_Biological_Process_2021	regulation of nuclear-transcribed mRNA catabolic process, deadenylation-dependent decay	1/15	0.0717556	0.200016	0	0	14.4949	38.1867	ZFP36L1	0.0666667	1.14414
GO_Biological_Process_2021	myoblast differentiation	1/15	0.0717556	0.200016	0	0	14.4949	38.1867	SDC1	0.0666667	1.14414
GO_Biological_Process_2021	lipoxygenase pathway	1/15	0.0717556	0.200016	0	0	14.4949	38.1867	LTC4S	0.0666667	1.14414
GO_Biological_Process_2021	positive regulation of nuclear-transcribed mRNA catabolic process, deadenylation-dependent decay	1/15	0.0717556	0.200016	0	0	14.4949	38.1867	ZFP36L1	0.0666667	1.14414
GO_Biological_Process_2021	peptidyl-tyrosine autophosphorylation	1/15	0.0717556	0.200016	0	0	14.4949	38.1867	EGFR	0.0666667	1.14414
GO_Biological_Process_2021	positive regulation of exosomal secretion	1/15	0.0717556	0.200016	0	0	14.4949	38.1867	SDC1	0.0666667	1.14414
GO_Biological_Process_2021	fibrinolysis	1/15	0.0717556	0.200016	0	0	14.4949	38.1867	PLAT	0.0666667	1.14414
GO_Biological_Process_2021	collagen fibril organization	2/89	0.0719905	0.200126	0	0	4.69582	12.3557	COL1A1;COL5A2	0.0224719	1.14272
GO_Biological_Process_2021	cellular amino acid catabolic process	2/90	0.0733965	0.201314	0	0	4.64222	12.1249	HOGA1;GLS	0.0222222	1.13432
GO_Biological_Process_2021	transcription by RNA polymerase II	4/320	0.074587	0.201314	0	0	2.60959	6.77395	YAP1;NOTCH2;WWTR1;CCN2	0.0125	1.12734
GO_Biological_Process_2021	sensory perception of sound	2/91	0.0748113	0.201314	0	0	4.58983	11.9004	COL1A1;DCDC2	0.021978	1.12603
GO_Biological_Process_2021	regulation of apoptotic process	7/742	0.0751277	0.201314	0	0	1.98406	5.13587	NOTCH2;VAV3;CCND2;ADAMTSL4;KCNMA1;SLIT2;EGFR	0.00943396	1.1242
GO_Biological_Process_2021	regulation of signal transduction	3/198	0.0753002	0.201314	0	0	3.15801	8.16748	WWTR1;DCDC2;FGFR2	0.0151515	1.1232
GO_Biological_Process_2021	cellular response to fibroblast growth factor stimulus	2/92	0.0762349	0.201314	0	0	4.5386	11.6821	FGFR2;ZFP36L1	0.0217391	1.11785
Reactome_2016	GRB2 events in ERBB2 signaling	1/16	0.0763538	0.173836	0	0	13.5279	34.7988	EGFR	0.0625	1.11717
Reactome_2016	PI3K events in ERBB2 signaling	1/16	0.0763538	0.173836	0	0	13.5279	34.7988	EGFR	0.0625	1.11717
GO_Biological_Process_2021	regulation of intrinsic apoptotic signaling pathway in response to DNA damage	1/16	0.0763538	0.201314	0	0	13.5279	34.7988	CXCL12	0.0625	1.11717
GO_Biological_Process_2021	regulation of fatty acid oxidation	1/16	0.0763538	0.201314	0	0	13.5279	34.7988	FABP3	0.0625	1.11717
GO_Biological_Process_2021	cellular response to corticosteroid stimulus	1/16	0.0763538	0.201314	0	0	13.5279	34.7988	ZFP36L1	0.0625	1.11717
GO_Biological_Process_2021	regulation of ERBB signaling pathway	1/16	0.0763538	0.201314	0	0	13.5279	34.7988	EGFR	0.0625	1.11717
GO_Biological_Process_2021	3'-UTR-mediated mRNA destabilization	1/16	0.0763538	0.201314	0	0	13.5279	34.7988	ZFP36L1	0.0625	1.11717
GO_Biological_Process_2021	nitric oxide metabolic process	1/16	0.0763538	0.201314	0	0	13.5279	34.7988	NQO1	0.0625	1.11717
GO_Biological_Process_2021	regulation of monocyte differentiation	1/16	0.0763538	0.201314	0	0	13.5279	34.7988	ZFP36L1	0.0625	1.11717
GO_Biological_Process_2021	digestive tract morphogenesis	1/16	0.0763538	0.201314	0	0	13.5279	34.7988	FGFR2	0.0625	1.11717
GO_Biological_Process_2021	platelet-derived growth factor receptor signaling pathway	1/16	0.0763538	0.201314	0	0	13.5279	34.7988	PLAT	0.0625	1.11717
GO_Biological_Process_2021	positive regulation of collagen biosynthetic process	1/16	0.0763538	0.201314	0	0	13.5279	34.7988	VIM	0.0625	1.11717
GO_Biological_Process_2021	glutamine family amino acid catabolic process	1/16	0.0763538	0.201314	0	0	13.5279	34.7988	GLS	0.0625	1.11717
GO_Biological_Process_2021	mesenchyme development	1/16	0.0763538	0.201314	0	0	13.5279	34.7988	FGFR2	0.0625	1.11717
GO_Biological_Process_2021	motor neuron axon guidance	1/16	0.0763538	0.201314	0	0	13.5279	34.7988	SLIT2	0.0625	1.11717
GO_Biological_Process_2021	protein localization to endoplasmic reticulum	1/16	0.0763538	0.201314	0	0	13.5279	34.7988	PPP1R15A	0.0625	1.11717
Reactome_2016	Class A/1 (Rhodopsin-like receptors)	4/323	0.0765978	0.173836	0	0	2.58466	6.64047	CXCL12;GPR37;PENK;PPY	0.0123839	1.11578
GO_Biological_Process_2021	regulation of heart contraction	2/93	0.0776671	0.202423	0	0	4.4885	11.4696	CAMK2D;ITPR1	0.0215054	1.10976
GO_Biological_Process_2021	visual perception	2/93	0.0776671	0.202423	0	0	4.4885	11.4696	COL1A1;ABLIM1	0.0215054	1.10976
KEGG_2021_Human	Salivary secretion	2/93	0.0776671	0.27615	0	0	4.4885	11.4696	KCNMA1;ITPR1	0.0215054	1.10976
GO_Biological_Process_2021	generation of neurons	3/202	0.0788855	0.202423	0	0	3.09391	7.85777	YAP1;DCDC2;SPOCK1	0.0148515	1.103
GO_Biological_Process_2021	regulation of kinase activity	2/94	0.0791079	0.202423	0	0	4.43949	11.2627	EGFR;FGFR2	0.0212766	1.10178
GO_Biological_Process_2021	hemopoiesis	2/94	0.0791079	0.202423	0	0	4.43949	11.2627	NOTCH2;FGFR2	0.0212766	1.10178
GO_Biological_Process_2021	sensory perception of light stimulus	2/95	0.080557	0.202423	0	0	4.39153	11.0613	COL1A1;ABLIM1	0.0210526	1.0939
Reactome_2016	Ras activation uopn Ca2+ infux through NMDA receptor	1/17	0.0809295	0.178327	0	0	12.6818	31.8842	CAMK2D	0.0588235	1.09189
GO_Biological_Process_2021	aorta morphogenesis	1/17	0.0809295	0.202423	0	0	12.6818	31.8842	ADAMTS9	0.0588235	1.09189
GO_Biological_Process_2021	regulation of cardiac muscle contraction by regulation of the release of sequestered calcium ion	1/17	0.0809295	0.202423	0	0	12.6818	31.8842	CAMK2D	0.0588235	1.09189
GO_Biological_Process_2021	regulation of cellular response to growth factor stimulus	1/17	0.0809295	0.202423	0	0	12.6818	31.8842	SLIT2	0.0588235	1.09189
GO_Biological_Process_2021	cell surface receptor signaling pathway involved in heart development	1/17	0.0809295	0.202423	0	0	12.6818	31.8842	NOTCH2	0.0588235	1.09189
GO_Biological_Process_2021	cellular response to gamma radiation	1/17	0.0809295	0.202423	0	0	12.6818	31.8842	YAP1	0.0588235	1.09189
GO_Biological_Process_2021	positive regulation of muscle hypertrophy	1/17	0.0809295	0.202423	0	0	12.6818	31.8842	CAMK2D	0.0588235	1.09189
GO_Biological_Process_2021	positive regulation of cardiac muscle tissue growth	1/17	0.0809295	0.202423	0	0	12.6818	31.8842	FGFR2	0.0588235	1.09189
GO_Biological_Process_2021	positive regulation of collagen metabolic process	1/17	0.0809295	0.202423	0	0	12.6818	31.8842	VIM	0.0588235	1.09189
GO_Biological_Process_2021	gliogenesis	1/17	0.0809295	0.202423	0	0	12.6818	31.8842	NFIB	0.0588235	1.09189
GO_Biological_Process_2021	positive regulation of DNA replication	1/17	0.0809295	0.202423	0	0	12.6818	31.8842	EGFR	0.0588235	1.09189
GO_Biological_Process_2021	regulation of osteoblast proliferation	1/17	0.0809295	0.202423	0	0	12.6818	31.8842	FGFR2	0.0588235	1.09189
Reactome_2016	Unblocking of NMDA receptor, glutamate binding and activation	1/17	0.0809295	0.178327	0	0	12.6818	31.8842	CAMK2D	0.0588235	1.09189
Reactome_2016	Activated point mutants of FGFR2	1/17	0.0809295	0.178327	0	0	12.6818	31.8842	FGFR2	0.0588235	1.09189
GO_Biological_Process_2021	positive regulation of positive chemotaxis	1/17	0.0809295	0.202423	0	0	12.6818	31.8842	CXCL12	0.0588235	1.09189
GO_Biological_Process_2021	positive regulation of smooth muscle cell migration	1/17	0.0809295	0.202423	0	0	12.6818	31.8842	DOCK4	0.0588235	1.09189
GO_Biological_Process_2021	modified amino acid transport	1/17	0.0809295	0.202423	0	0	12.6818	31.8842	SLC16A12	0.0588235	1.09189
GO_Biological_Process_2021	cellular modified amino acid catabolic process	1/17	0.0809295	0.202423	0	0	12.6818	31.8842	HOGA1	0.0588235	1.09189
Reactome_2016	Butyrate Response Factor 1 (BRF1) binds and destabilizes mRNA	1/17	0.0809295	0.178327	0	0	12.6818	31.8842	ZFP36L1	0.0588235	1.09189
Reactome_2016	Inflammasomes	1/17	0.0809295	0.178327	0	0	12.6818	31.8842	TXNIP	0.0588235	1.09189
KEGG_2021_Human	Phosphatidylinositol signaling system	2/97	0.08348	0.2774	0	0	4.29864	10.6742	ITPR1;PIP4K2A	0.0206186	1.07842
KEGG_2021_Human	Circadian entrainment	2/97	0.08348	0.2774	0	0	4.29864	10.6742	CAMK2D;ITPR1	0.0206186	1.07842
GO_Biological_Process_2021	calcium ion homeostasis	2/97	0.08348	0.20337	0	0	4.29864	10.6742	CXCL12;RGN	0.0206186	1.07842
GO_Biological_Process_2021	glycosaminoglycan biosynthetic process	2/97	0.08348	0.20337	0	0	4.29864	10.6742	SDC1;HSPG2	0.0206186	1.07842
Reactome_2016	Metabolism of amino acids and derivatives	4/335	0.0849116	0.184079	0	0	2.48943	6.13928	NQO1;GPT2;ASS1;GLS	0.0119403	1.07103
KEGG_2021_Human	Inflammatory mediator regulation of TRP channels	2/98	0.0849537	0.2774	0	0	4.25365	10.488	CAMK2D;ITPR1	0.0204082	1.07082
KEGG_2021_Human	Aldosterone synthesis and secretion	2/98	0.0849537	0.2774	0	0	4.25365	10.488	CAMK2D;ITPR1	0.0204082	1.07082
Reactome_2016	Activation of SMO	1/18	0.0854828	0.184079	0	0	11.9352	29.3538	ARRB1	0.0555556	1.06812
GO_Biological_Process_2021	regulation of B cell differentiation	1/18	0.0854828	0.20337	0	0	11.9352	29.3538	ZFP36L1	0.0555556	1.06812
GO_Biological_Process_2021	3'-UTR-mediated mRNA stabilization	1/18	0.0854828	0.20337	0	0	11.9352	29.3538	YBX3	0.0555556	1.06812
GO_Biological_Process_2021	water transport	1/18	0.0854828	0.20337	0	0	11.9352	29.3538	AQP8	0.0555556	1.06812
GO_Biological_Process_2021	positive regulation of phosphoprotein phosphatase activity	1/18	0.0854828	0.20337	0	0	11.9352	29.3538	PPP1R15A	0.0555556	1.06812
Reactome_2016	SHC1 events in ERBB2 signaling	1/18	0.0854828	0.184079	0	0	11.9352	29.3538	EGFR	0.0555556	1.06812
GO_Biological_Process_2021	negative regulation of cation transmembrane transport	1/18	0.0854828	0.20337	0	0	11.9352	29.3538	CAMK2D	0.0555556	1.06812
GO_Biological_Process_2021	negative regulation of interleukin-8 production	1/18	0.0854828	0.20337	0	0	11.9352	29.3538	ARRB1	0.0555556	1.06812
Reactome_2016	Pre-NOTCH Processing in Golgi	1/18	0.0854828	0.184079	0	0	11.9352	29.3538	NOTCH2	0.0555556	1.06812
GO_Biological_Process_2021	intermediate filament organization	1/18	0.0854828	0.20337	0	0	11.9352	29.3538	VIM	0.0555556	1.06812
GO_Biological_Process_2021	interleukin-6-mediated signaling pathway	1/18	0.0854828	0.20337	0	0	11.9352	29.3538	YAP1	0.0555556	1.06812
GO_Biological_Process_2021	glycoprotein catabolic process	1/18	0.0854828	0.20337	0	0	11.9352	29.3538	ADAMTS9	0.0555556	1.06812
GO_Biological_Process_2021	regulation of transforming growth factor beta production	1/18	0.0854828	0.20337	0	0	11.9352	29.3538	FN1	0.0555556	1.06812
GO_Biological_Process_2021	regulation of transcription by RNA polymerase I	1/18	0.0854828	0.20337	0	0	11.9352	29.3538	RASL11A	0.0555556	1.06812
GO_Biological_Process_2021	fluid transport	1/18	0.0854828	0.20337	0	0	11.9352	29.3538	AQP8	0.0555556	1.06812
GO_Biological_Process_2021	positive regulation of cardiac muscle hypertrophy	1/18	0.0854828	0.20337	0	0	11.9352	29.3538	CAMK2D	0.0555556	1.06812
GO_Biological_Process_2021	regulation of production of miRNAs involved in gene silencing by miRNA	1/18	0.0854828	0.20337	0	0	11.9352	29.3538	EGFR	0.0555556	1.06812
GO_Biological_Process_2021	regulation of membrane depolarization	1/18	0.0854828	0.20337	0	0	11.9352	29.3538	CAMK2D	0.0555556	1.06812
GO_Biological_Process_2021	regulation of fatty acid metabolic process	1/18	0.0854828	0.20337	0	0	11.9352	29.3538	FABP3	0.0555556	1.06812
GO_Biological_Process_2021	cellular response to glucocorticoid stimulus	1/18	0.0854828	0.20337	0	0	11.9352	29.3538	ZFP36L1	0.0555556	1.06812
GO_Biological_Process_2021	cell migration involved in sprouting angiogenesis	1/18	0.0854828	0.20337	0	0	11.9352	29.3538	SLIT2	0.0555556	1.06812
GO_Biological_Process_2021	negative regulation of leukocyte cell-cell adhesion	1/18	0.0854828	0.20337	0	0	11.9352	29.3538	ASS1	0.0555556	1.06812
GO_Biological_Process_2021	cytokine-mediated signaling pathway	6/621	0.0878229	0.206466	0	0	2.02318	4.92126	YAP1;CAMK2D;CXCL12;FN1;SDC1;VIM	0.00966184	1.05639
GO_Biological_Process_2021	positive regulation of translation	2/100	0.0879246	0.206466	0	0	4.16642	10.1297	VIM;YBX3	0.02	1.05589
GO_Biological_Process_2021	cell-matrix adhesion	2/100	0.0879246	0.206466	0	0	4.16642	10.1297	FN1;ADAMTS9	0.02	1.05589
KEGG_2021_Human	AGE-RAGE signaling pathway in diabetic complications	2/100	0.0879246	0.280122	0	0	4.16642	10.1297	COL1A1;FN1	0.02	1.05589
GO_Biological_Process_2021	synaptic transmission, cholinergic	1/19	0.0900137	0.206466	0	0	11.2715	27.1395	NQO1	0.0526316	1.04569
Reactome_2016	Scavenging by Class A Receptors	1/19	0.0900137	0.188482	0	0	11.2715	27.1395	COL1A1	0.0526316	1.04569
GO_Biological_Process_2021	cardiac atrium morphogenesis	1/19	0.0900137	0.206466	0	0	11.2715	27.1395	NOTCH2	0.0526316	1.04569
Reactome_2016	Constitutive Signaling by Ligand-Responsive EGFR Cancer Variants	1/19	0.0900137	0.188482	0	0	11.2715	27.1395	EGFR	0.0526316	1.04569
GO_Biological_Process_2021	striated muscle cell differentiation	1/19	0.0900137	0.206466	0	0	11.2715	27.1395	SDC1	0.0526316	1.04569
GO_Biological_Process_2021	leukotriene biosynthetic process	1/19	0.0900137	0.206466	0	0	11.2715	27.1395	LTC4S	0.0526316	1.04569
GO_Biological_Process_2021	positive regulation of monocyte chemotaxis	1/19	0.0900137	0.206466	0	0	11.2715	27.1395	CXCL12	0.0526316	1.04569
GO_Biological_Process_2021	regulation of vascular endothelial growth factor signaling pathway	1/19	0.0900137	0.206466	0	0	11.2715	27.1395	CCBE1	0.0526316	1.04569
GO_Biological_Process_2021	regulation of nervous system process	1/19	0.0900137	0.206466	0	0	11.2715	27.1395	NPTX2	0.0526316	1.04569
GO_Biological_Process_2021	regulation of leukocyte chemotaxis	1/19	0.0900137	0.206466	0	0	11.2715	27.1395	SLIT2	0.0526316	1.04569
GO_Biological_Process_2021	regulation of collagen biosynthetic process	1/19	0.0900137	0.206466	0	0	11.2715	27.1395	VIM	0.0526316	1.04569
GO_Biological_Process_2021	cardiac muscle cell contraction	1/19	0.0900137	0.206466	0	0	11.2715	27.1395	CAMK2D	0.0526316	1.04569
GO_Biological_Process_2021	regulation of exosomal secretion	1/19	0.0900137	0.206466	0	0	11.2715	27.1395	SDC1	0.0526316	1.04569
GO_Biological_Process_2021	carbohydrate derivative catabolic process	1/19	0.0900137	0.206466	0	0	11.2715	27.1395	ADAMTS9	0.0526316	1.04569
Reactome_2016	Signaling by FGFR2 IIIa TM	1/19	0.0900137	0.188482	0	0	11.2715	27.1395	FGFR2	0.0526316	1.04569
Reactome_2016	Signaling by Ligand-Responsive EGFR Variants in Cancer	1/19	0.0900137	0.188482	0	0	11.2715	27.1395	EGFR	0.0526316	1.04569
GO_Biological_Process_2021	aspartate family amino acid metabolic process	1/19	0.0900137	0.206466	0	0	11.2715	27.1395	ASS1	0.0526316	1.04569
Reactome_2016	Signaling by EGFR in Cancer	1/19	0.0900137	0.188482	0	0	11.2715	27.1395	EGFR	0.0526316	1.04569
KEGG_2021_Human	Amoebiasis	2/102	0.0909264	0.280122	0	0	4.08268	9.78906	COL1A1;FN1	0.0196078	1.04131
GO_Biological_Process_2021	regulation of cell death	2/102	0.0909264	0.206706	0	0	4.08268	9.78906	SNCG;CCN2	0.0196078	1.04131
GO_Biological_Process_2021	cell junction assembly	2/102	0.0909264	0.206706	0	0	4.08268	9.78906	VMP1;FN1	0.0196078	1.04131
GO_Biological_Process_2021	positive regulation of cell growth	2/102	0.0909264	0.206706	0	0	4.08268	9.78906	PRSS2;EGFR	0.0196078	1.04131
GO_Biological_Process_2021	intrinsic apoptotic signaling pathway	2/102	0.0909264	0.206706	0	0	4.08268	9.78906	PPP1R15A;ITPR1	0.0196078	1.04131
KEGG_2021_Human	Lipid and atherosclerosis	3/215	0.0910397	0.280122	0	0	2.90227	6.95517	VAV3;CAMK2D;ITPR1	0.0139535	1.04077
GO_Biological_Process_2021	positive regulation of protein processing	1/20	0.0945224	0.209754	0	0	10.6778	25.188	CCBE1	0.05	1.02447
GO_Biological_Process_2021	positive regulation of peptidyl-lysine acetylation	1/20	0.0945224	0.209754	0	0	10.6778	25.188	ARRB1	0.05	1.02447
GO_Biological_Process_2021	endoplasmic reticulum calcium ion homeostasis	1/20	0.0945224	0.209754	0	0	10.6778	25.188	CAMK2D	0.05	1.02447
GO_Biological_Process_2021	regulation of T cell migration	1/20	0.0945224	0.209754	0	0	10.6778	25.188	CXCL12	0.05	1.02447
GO_Biological_Process_2021	fatty acid transport	1/20	0.0945224	0.209754	0	0	10.6778	25.188	FABP3	0.05	1.02447
GO_Biological_Process_2021	positive regulation of hormone secretion	1/20	0.0945224	0.209754	0	0	10.6778	25.188	SPP1	0.05	1.02447
GO_Biological_Process_2021	regulation of smooth muscle cell migration	1/20	0.0945224	0.209754	0	0	10.6778	25.188	SLIT2	0.05	1.02447
GO_Biological_Process_2021	cellular monovalent inorganic cation homeostasis	1/20	0.0945224	0.209754	0	0	10.6778	25.188	KCNMA1	0.05	1.02447
GO_Biological_Process_2021	embryonic digestive tract development	1/20	0.0945224	0.209754	0	0	10.6778	25.188	FGFR2	0.05	1.02447
Reactome_2016	FGFR2 ligand binding and activation	1/20	0.0945224	0.194696	0	0	10.6778	25.188	FGFR2	0.05	1.02447
GO_Biological_Process_2021	negative regulation of dephosphorylation	1/20	0.0945224	0.209754	0	0	10.6778	25.188	PPP1R15A	0.05	1.02447
Reactome_2016	Syndecan interactions	1/20	0.0945224	0.194696	0	0	10.6778	25.188	SDC1	0.05	1.02447
Reactome_2016	Hormone-sensitive lipase (HSL)-mediated triacylglycerol hydrolysis	1/20	0.0945224	0.194696	0	0	10.6778	25.188	FABP3	0.05	1.02447
GO_Biological_Process_2021	regulation of lymphocyte differentiation	1/20	0.0945224	0.209754	0	0	10.6778	25.188	ZFP36L1	0.05	1.02447
GO_Biological_Process_2021	cellular response to lipid	3/219	0.0949286	0.210199	0	0	2.84795	6.70586	SPP1;VIM;EGFR	0.0136986	1.0226
Reactome_2016	Platelet degranulation	2/105	0.0954851	0.195615	0	0	3.96317	9.30863	SPARC;FN1	0.0190476	1.02006
GO_Biological_Process_2021	regulation of JNK cascade	2/105	0.0954851	0.210975	0	0	3.96317	9.30863	CCN2;EGFR	0.0190476	1.02006
GO_Biological_Process_2021	supramolecular fiber organization	4/351	0.0966556	0.211013	0	0	2.3727	5.54405	COL1A1;COL5A2;VIM;HSPG2	0.011396	1.01477
GO_Biological_Process_2021	positive regulation of cell motility	3/221	0.0968985	0.211013	0	0	2.82153	6.58571	COL1A1;CXCL12;EGFR	0.0135747	1.01368
GO_Biological_Process_2021	positive regulation of protein serine/threonine kinase activity	2/106	0.0970191	0.211013	0	0	3.92486	9.1561	CCND2;EGFR	0.0188679	1.01314
KEGG_2021_Human	Glucagon signaling pathway	2/107	0.0985601	0.295747	0	0	3.88729	9.00718	CAMK2D;ITPR1	0.0186916	1.0063
GO_Biological_Process_2021	response to calcium ion	2/107	0.0985601	0.211013	0	0	3.88729	9.00718	CAMK2D;KCNMA1	0.0186916	1.0063
GO_Biological_Process_2021	androgen metabolic process	1/21	0.099009	0.211013	0	0	10.1434	23.457	SPP1	0.047619	1.00433
GO_Biological_Process_2021	autonomic nervous system development	1/21	0.099009	0.211013	0	0	10.1434	23.457	FN1	0.047619	1.00433
GO_Biological_Process_2021	regulation of cardiac muscle cell proliferation	1/21	0.099009	0.211013	0	0	10.1434	23.457	FGFR2	0.047619	1.00433
GO_Biological_Process_2021	purinergic nucleotide receptor signaling pathway	1/21	0.099009	0.211013	0	0	10.1434	23.457	TXNIP	0.047619	1.00433
GO_Biological_Process_2021	positive regulation of smoothened signaling pathway	1/21	0.099009	0.211013	0	0	10.1434	23.457	DCDC2	0.047619	1.00433
GO_Biological_Process_2021	regulation of cell-substrate junction assembly	1/21	0.099009	0.211013	0	0	10.1434	23.457	LIMCH1	0.047619	1.00433
GO_Biological_Process_2021	cellular response to estradiol stimulus	1/21	0.099009	0.211013	0	0	10.1434	23.457	EGFR	0.047619	1.00433
GO_Biological_Process_2021	negative regulation of small GTPase mediated signal transduction	1/21	0.099009	0.211013	0	0	10.1434	23.457	SLIT2	0.047619	1.00433
GO_Biological_Process_2021	response to progesterone	1/21	0.099009	0.211013	0	0	10.1434	23.457	YAP1	0.047619	1.00433
GO_Biological_Process_2021	intracellular lipid transport	1/21	0.099009	0.211013	0	0	10.1434	23.457	FABP3	0.047619	1.00433
GO_Biological_Process_2021	positive regulation of phosphatase activity	1/21	0.099009	0.211013	0	0	10.1434	23.457	PPP1R15A	0.047619	1.00433
GO_Biological_Process_2021	regulation of cardiac muscle contraction by calcium ion signaling	1/21	0.099009	0.211013	0	0	10.1434	23.457	CAMK2D	0.047619	1.00433
GO_Biological_Process_2021	negative regulation of ion transmembrane transporter activity	1/21	0.099009	0.211013	0	0	10.1434	23.457	CAMK2D	0.047619	1.00433
Reactome_2016	Signal transduction by L1	1/21	0.099009	0.199598	0	0	10.1434	23.457	EGFR	0.047619	1.00433
Reactome_2016	NOTCH2 Activation and Transmission of Signal to the Nucleus	1/21	0.099009	0.199598	0	0	10.1434	23.457	NOTCH2	0.047619	1.00433
Reactome_2016	Synthesis of Leukotrienes (LT) and Eoxins (EX)	1/21	0.099009	0.199598	0	0	10.1434	23.457	LTC4S	0.047619	1.00433
KEGG_2021_Human	Human cytomegalovirus infection	3/225	0.100888	0.295747	0	0	2.77013	6.35396	CXCL12;ITPR1;EGFR	0.0133333	0.996159
KEGG_2021_Human	HIF-1 signaling pathway	2/109	0.101663	0.295747	0	0	3.81424	8.7197	CAMK2D;EGFR	0.0183486	0.992837
Reactome_2016	O-linked glycosylation	2/110	0.103225	0.205906	0	0	3.77873	8.58092	ADAMTSL4;ADAMTS9	0.0181818	0.986217
Reactome_2016	Response to elevated platelet cytosolic Ca2+	2/110	0.103225	0.205906	0	0	3.77873	8.58092	SPARC;FN1	0.0181818	0.986217
GO_Biological_Process_2021	regulation of protein kinase activity	2/110	0.103225	0.217806	0	0	3.77873	8.58092	WWTR1;MMD	0.0181818	0.986217
GO_Biological_Process_2021	response to tumor necrosis factor	2/110	0.103225	0.217806	0	0	3.77873	8.58092	YBX3;ZFP36L1	0.0181818	0.986217
GO_Biological_Process_2021	negative regulation of protein dephosphorylation	1/22	0.103474	0.217806	0	0	9.65986	21.9128	PPP1R15A	0.0454545	0.98517
GO_Biological_Process_2021	negative regulation of myeloid cell differentiation	1/22	0.103474	0.217806	0	0	9.65986	21.9128	ZFP36L1	0.0454545	0.98517
GO_Biological_Process_2021	glutamate metabolic process	1/22	0.103474	0.217806	0	0	9.65986	21.9128	GLS	0.0454545	0.98517
GO_Biological_Process_2021	positive regulation of calcium ion transmembrane transporter activity	1/22	0.103474	0.217806	0	0	9.65986	21.9128	VMP1	0.0454545	0.98517
GO_Biological_Process_2021	cellular divalent inorganic cation homeostasis	2/111	0.104793	0.219679	0	0	3.74388	8.44532	CXCL12;RGN	0.018018	0.979668
GO_Biological_Process_2021	regulation of Wnt signaling pathway	2/111	0.104793	0.219679	0	0	3.74388	8.44532	DCDC2;FGFR2	0.018018	0.979668
GO_Biological_Process_2021	protein-containing complex subunit organization	2/112	0.106368	0.220356	0	0	3.70965	8.31279	YAP1;MAGI1	0.0178571	0.97319
GO_Biological_Process_2021	regulation of autophagy	3/231	0.106995	0.220356	0	0	2.69641	6.0264	ITPR1;PIP4K2A;DEPP1	0.012987	0.970637
Reactome_2016	RNA Polymerase III Transcription Termination	1/23	0.107916	0.21089	0	0	9.22032	20.5281	NFIB	0.0434783	0.966913
KEGG_2021_Human	Proximal tubule bicarbonate reclamation	1/23	0.107916	0.297048	0	0	9.22032	20.5281	GLS	0.0434783	0.966913
Reactome_2016	Laminin interactions	1/23	0.107916	0.21089	0	0	9.22032	20.5281	HSPG2	0.0434783	0.966913
Reactome_2016	Downregulation of SMAD2/3:SMAD4 transcriptional activity	1/23	0.107916	0.21089	0	0	9.22032	20.5281	TGIF1	0.0434783	0.966913
GO_Biological_Process_2021	regulation of release of sequestered calcium ion into cytosol by sarcoplasmic reticulum	1/23	0.107916	0.220356	0	0	9.22032	20.5281	CAMK2D	0.0434783	0.966913
GO_Biological_Process_2021	ERK1 and ERK2 cascade	1/23	0.107916	0.220356	0	0	9.22032	20.5281	ZFP36L1	0.0434783	0.966913
GO_Biological_Process_2021	positive regulation of transcription by RNA polymerase I	1/23	0.107916	0.220356	0	0	9.22032	20.5281	RASL11A	0.0434783	0.966913
GO_Biological_Process_2021	positive regulation of receptor internalization	1/23	0.107916	0.220356	0	0	9.22032	20.5281	ARRB1	0.0434783	0.966913
GO_Biological_Process_2021	positive regulation of histone acetylation	1/23	0.107916	0.220356	0	0	9.22032	20.5281	ARRB1	0.0434783	0.966913
GO_Biological_Process_2021	regulation of calcium ion transmembrane transport	1/23	0.107916	0.220356	0	0	9.22032	20.5281	CAMK2D	0.0434783	0.966913
GO_Biological_Process_2021	blood vessel endothelial cell migration	1/23	0.107916	0.220356	0	0	9.22032	20.5281	SLIT2	0.0434783	0.966913
GO_Biological_Process_2021	negative regulation of phosphoprotein phosphatase activity	1/23	0.107916	0.220356	0	0	9.22032	20.5281	PPP1R15A	0.0434783	0.966913
GO_Biological_Process_2021	ear morphogenesis	1/23	0.107916	0.220356	0	0	9.22032	20.5281	FGFR2	0.0434783	0.966913
GO_Biological_Process_2021	regulation of necroptotic process	1/23	0.107916	0.220356	0	0	9.22032	20.5281	YBX3	0.0434783	0.966913
GO_Biological_Process_2021	regulation of mononuclear cell migration	1/23	0.107916	0.220356	0	0	9.22032	20.5281	SLIT2	0.0434783	0.966913
Reactome_2016	PPARA activates gene expression	2/113	0.107949	0.21089	0	0	3.67605	8.18324	YAP1;WWTR1	0.0176991	0.966782
KEGG_2021_Human	Cholinergic synapse	2/113	0.107949	0.297048	0	0	3.67605	8.18324	CAMK2D;ITPR1	0.0176991	0.966782
KEGG_2021_Human	Leukocyte transendothelial migration	2/114	0.109537	0.297048	0	0	3.64304	8.05658	VAV3;CXCL12	0.0175439	0.960441
GO_Biological_Process_2021	response to lipid	2/114	0.109537	0.222775	0	0	3.64304	8.05658	HSD17B2;SPP1	0.0175439	0.960441
GO_Biological_Process_2021	negative regulation of cell motility	2/114	0.109537	0.222775	0	0	3.64304	8.05658	LIMCH1;SLIT2	0.0175439	0.960441
KEGG_2021_Human	Glutamatergic synapse	2/114	0.109537	0.297048	0	0	3.64304	8.05658	ITPR1;GLS	0.0175439	0.960441
GO_Biological_Process_2021	regulation of cell size	1/24	0.112337	0.224017	0	0	8.81899	19.2805	VAV3	0.0416667	0.949476
GO_Biological_Process_2021	phospholipid catabolic process	1/24	0.112337	0.224017	0	0	8.81899	19.2805	PNLIPRP2	0.0416667	0.949476
GO_Biological_Process_2021	response to gamma radiation	1/24	0.112337	0.224017	0	0	8.81899	19.2805	YAP1	0.0416667	0.949476
GO_Biological_Process_2021	inner ear morphogenesis	1/24	0.112337	0.224017	0	0	8.81899	19.2805	FGFR2	0.0416667	0.949476
GO_Biological_Process_2021	positive regulation of phospholipase activity	1/24	0.112337	0.224017	0	0	8.81899	19.2805	FGFR2	0.0416667	0.949476
Reactome_2016	Glutamate Neurotransmitter Release Cycle	1/24	0.112337	0.216877	0	0	8.81899	19.2805	GLS	0.0416667	0.949476
GO_Biological_Process_2021	protein kinase B signaling	1/24	0.112337	0.224017	0	0	8.81899	19.2805	ZFP36L1	0.0416667	0.949476
GO_Biological_Process_2021	potassium ion homeostasis	1/24	0.112337	0.224017	0	0	8.81899	19.2805	KCNMA1	0.0416667	0.949476
GO_Biological_Process_2021	regulation of monooxygenase activity	1/24	0.112337	0.224017	0	0	8.81899	19.2805	EGFR	0.0416667	0.949476
GO_Biological_Process_2021	regulation of cardiac muscle hypertrophy	1/24	0.112337	0.224017	0	0	8.81899	19.2805	CAMK2D	0.0416667	0.949476
GO_Biological_Process_2021	axon extension	1/24	0.112337	0.224017	0	0	8.81899	19.2805	SLIT2	0.0416667	0.949476
Reactome_2016	RNA Polymerase I, RNA Polymerase III, and Mitochondrial Transcription	2/116	0.11273	0.216877	0	0	3.57877	7.81158	NFIB;HIST1H2BD	0.0172414	0.947959
Reactome_2016	Regulation of lipid metabolism by Peroxisome proliferator-activated receptor alpha (PPARalpha)	2/116	0.11273	0.216877	0	0	3.57877	7.81158	YAP1;WWTR1	0.0172414	0.947959
KEGG_2021_Human	Chemical carcinogenesis	3/239	0.115357	0.307619	0	0	2.60395	5.6238	NOTCH2;ARRB1;EGFR	0.0125523	0.937956
Reactome_2016	G alpha (i) signalling events	3/240	0.116419	0.222843	0	0	2.59283	5.57602	CXCL12;PENK;PPY	0.0125	0.933974
GO_Biological_Process_2021	positive regulation of vascular endothelial growth factor production	1/25	0.116736	0.227469	0	0	8.45111	18.1516	CCBE1	0.04	0.932794
GO_Biological_Process_2021	regulation of calcium ion import	1/25	0.116736	0.227469	0	0	8.45111	18.1516	CXCL12	0.04	0.932794
GO_Biological_Process_2021	cardiac conduction system development	1/25	0.116736	0.227469	0	0	8.45111	18.1516	NOTCH2	0.04	0.932794
GO_Biological_Process_2021	regulation of epidermal cell differentiation	1/25	0.116736	0.227469	0	0	8.45111	18.1516	ZFP36L1	0.04	0.932794
GO_Biological_Process_2021	negative regulation of sequestering of calcium ion	1/25	0.116736	0.227469	0	0	8.45111	18.1516	ITPR1	0.04	0.932794
GO_Biological_Process_2021	outflow tract septum morphogenesis	1/25	0.116736	0.227469	0	0	8.45111	18.1516	FGFR2	0.04	0.932794
GO_Biological_Process_2021	regulation of neutrophil chemotaxis	1/25	0.116736	0.227469	0	0	8.45111	18.1516	SLIT2	0.04	0.932794
GO_Biological_Process_2021	regulation of protein processing	1/25	0.116736	0.227469	0	0	8.45111	18.1516	CCBE1	0.04	0.932794
GO_Biological_Process_2021	regulation of ryanodine-sensitive calcium-release channel activity	1/25	0.116736	0.227469	0	0	8.45111	18.1516	CAMK2D	0.04	0.932794
GO_Biological_Process_2021	in utero embryonic development	1/25	0.116736	0.227469	0	0	8.45111	18.1516	FGFR2	0.04	0.932794
GO_Biological_Process_2021	positive regulation of T cell migration	1/25	0.116736	0.227469	0	0	8.45111	18.1516	CXCL12	0.04	0.932794
GO_Biological_Process_2021	negative regulation of actin filament polymerization	1/25	0.116736	0.227469	0	0	8.45111	18.1516	SLIT2	0.04	0.932794
Reactome_2016	Fcgamma receptor (FCGR) dependent phagocytosis	2/120	0.11919	0.226999	0	0	3.45675	7.35265	VAV3;ITPR1	0.0166667	0.923762
GO_Biological_Process_2021	anterograde trans-synaptic signaling	3/244	0.120706	0.234658	0	0	2.54927	5.39018	PENK;SNCG;NPTX2	0.0122951	0.918271
Reactome_2016	Glycosaminoglycan metabolism	2/121	0.120819	0.227239	0	0	3.42753	7.24397	SDC1;HSPG2	0.0165289	0.917866
GO_Biological_Process_2021	negative regulation of intrinsic apoptotic signaling pathway in response to DNA damage	1/26	0.121114	0.234658	0	0	8.11265	17.126	CXCL12	0.0384615	0.916806
GO_Biological_Process_2021	lamellipodium assembly	1/26	0.121114	0.234658	0	0	8.11265	17.126	ABLIM1	0.0384615	0.916806
Reactome_2016	SHC-mediated cascade:FGFR2	1/26	0.121114	0.227239	0	0	8.11265	17.126	FGFR2	0.0384615	0.916806
Reactome_2016	Downregulation of TGF-beta receptor signaling	1/26	0.121114	0.227239	0	0	8.11265	17.126	PPP1R15A	0.0384615	0.916806
GO_Biological_Process_2021	regulation of mRNA catabolic process	2/122	0.122453	0.236805	0	0	3.3988	7.13756	VIM;ZFP36L1	0.0163934	0.912029
Reactome_2016	Signaling by NOTCH	2/122	0.122453	0.227527	0	0	3.3988	7.13756	NOTCH2;ARRB1	0.0163934	0.912029
GO_Biological_Process_2021	regulation of anatomical structure morphogenesis	2/123	0.124094	0.237257	0	0	3.37054	7.03336	SPARC;FGFR2	0.0162602	0.90625
Reactome_2016	Platelet calcium homeostasis	1/27	0.12547	0.227527	0	0	7.80024	16.1909	ITPR1	0.037037	0.90146
Reactome_2016	CREB phosphorylation through the activation of Ras	1/27	0.12547	0.227527	0	0	7.80024	16.1909	CAMK2D	0.037037	0.90146
GO_Biological_Process_2021	cellular response to cadmium ion	1/27	0.12547	0.237257	0	0	7.80024	16.1909	EGFR	0.037037	0.90146
Reactome_2016	Integrin alphaIIb beta3 signaling	1/27	0.12547	0.227527	0	0	7.80024	16.1909	FN1	0.037037	0.90146
GO_Biological_Process_2021	monocarboxylic acid catabolic process	1/27	0.12547	0.237257	0	0	7.80024	16.1909	HOGA1	0.037037	0.90146
Reactome_2016	EGFR downregulation	1/27	0.12547	0.227527	0	0	7.80024	16.1909	EGFR	0.037037	0.90146
GO_Biological_Process_2021	cellular lipid catabolic process	1/27	0.12547	0.237257	0	0	7.80024	16.1909	PNLIPRP2	0.037037	0.90146
GO_Biological_Process_2021	release of sequestered calcium ion into cytosol	1/27	0.12547	0.237257	0	0	7.80024	16.1909	ITPR1	0.037037	0.90146
GO_Biological_Process_2021	negative regulation of protein polymerization	1/27	0.12547	0.237257	0	0	7.80024	16.1909	SLIT2	0.037037	0.90146
Reactome_2016	Effects of PIP2 hydrolysis	1/27	0.12547	0.227527	0	0	7.80024	16.1909	ITPR1	0.037037	0.90146
GO_Biological_Process_2021	negative regulation of insulin receptor signaling pathway	1/27	0.12547	0.237257	0	0	7.80024	16.1909	PIP4K2A	0.037037	0.90146
GO_Biological_Process_2021	presynaptic endocytosis	1/27	0.12547	0.237257	0	0	7.80024	16.1909	SNCG	0.037037	0.90146
GO_Biological_Process_2021	positive regulation of nitric oxide biosynthetic process	1/27	0.12547	0.237257	0	0	7.80024	16.1909	ASS1	0.037037	0.90146
GO_Biological_Process_2021	positive regulation of gene silencing by miRNA	1/27	0.12547	0.237257	0	0	7.80024	16.1909	EGFR	0.037037	0.90146
GO_Biological_Process_2021	camera-type eye development	1/27	0.12547	0.237257	0	0	7.80024	16.1909	FBN2	0.037037	0.90146
GO_Biological_Process_2021	regulation of vascular endothelial growth factor production	1/27	0.12547	0.237257	0	0	7.80024	16.1909	CCBE1	0.037037	0.90146
Reactome_2016	VEGFR2 mediated vascular permeability	1/27	0.12547	0.227527	0	0	7.80024	16.1909	VAV3	0.037037	0.90146
KEGG_2021_Human	Platelet activation	2/124	0.125739	0.325537	0	0	3.34274	6.93132	COL1A1;ITPR1	0.016129	0.900529
KEGG_2021_Human	Parkinson disease	3/249	0.126145	0.325537	0	0	2.49682	5.16922	CAMK2D;GPR37;ITPR1	0.0120482	0.899128
GO_Biological_Process_2021	regulation of phosphorylation	2/125	0.12739	0.238832	0	0	3.3154	6.83138	FN1;EGFR	0.016	0.894864
GO_Biological_Process_2021	platelet degranulation	2/125	0.12739	0.238832	0	0	3.3154	6.83138	SPARC;FN1	0.016	0.894864
GO_Biological_Process_2021	phosphatidylinositol biosynthetic process	2/126	0.129046	0.238832	0	0	3.28849	6.73347	PIP4K2A;FAM126A	0.015873	0.889255
GO_Biological_Process_2021	circulatory system development	2/126	0.129046	0.238832	0	0	3.28849	6.73347	FN1;HSPG2	0.015873	0.889255
GO_Biological_Process_2021	negative regulation of growth	2/126	0.129046	0.238832	0	0	3.28849	6.73347	NOTCH2;SLIT2	0.015873	0.889255
KEGG_2021_Human	Endocytosis	3/252	0.129451	0.325672	0	0	2.46637	5.04236	ARRB1;EGFR;FGFR2	0.0119048	0.887893
GO_Biological_Process_2021	negative regulation of phosphatase activity	1/28	0.129805	0.238832	0	0	7.51096	15.3353	PPP1R15A	0.0357143	0.886709
GO_Biological_Process_2021	regulation of sodium ion transmembrane transport	1/28	0.129805	0.238832	0	0	7.51096	15.3353	CAMK2D	0.0357143	0.886709
GO_Biological_Process_2021	glycerophospholipid catabolic process	1/28	0.129805	0.238832	0	0	7.51096	15.3353	PNLIPRP2	0.0357143	0.886709
GO_Biological_Process_2021	negative regulation of cellular response to insulin stimulus	1/28	0.129805	0.238832	0	0	7.51096	15.3353	PIP4K2A	0.0357143	0.886709
[truncated: 740 more rows]

## Sheet: Sheet5
Sheet5: Enriched pathways of gene cluster 1 for lineages PEC-to-Beta,1 vs PEC-to-Beta,0
[truncated: 578 more rows]

[truncated: 3 more sheets: Sheet6, Sheet7, Sheet8]
