# Supplementary material for: A multimodal cross-species comparison of pancreas development
Source: Research Square preprint supplement (doi:10.21203/rs.3.rs-4151759/v1), 2024-04-03
Supplement: Supplementary file 6 [file 90ee07100a3a8441359faa5e.xlsx]

## Sheet: Sheet Content
Supplementary Table 3: Differentially expressed genes of each cell cluster in the human, pig and mouse pancreas integrated scRNA-seq datasets
Sheet1: Differentially expressed genes of each cell cluster in the human integrated scRNA-seq datasets
Sheet2: Differentially expressed TFs of each cell cluster in the human integrated scRNA-seq datasets
Sheet3: Differentially expressed genes of each cell cluster in the pig integrated scRNA-seq datasets
Sheet4: Differentially expressed TFs of each cell cluster in the pig integrated scRNA-seq datasets
Sheet5: Differentially expressed genes of each cell cluster in the mouse integrated scRNA-seq datasets
Sheet6: Differentially expressed TFs of each cell cluster in the mouse integrated scRNA-seq datasets

## Sheet: Sheet1
Sheet1: Differentially expressed genes of each cell cluster in the human integrated scRNA-seq datasets
Cluster.Name	EID_human	gene_symbol	logFC	logCPM	LR	PValue	padj
Acinar	ENSG00000115828	QPCT	5.67372	5.59527	2129.37	0	0
Acinar	ENSG00000204103	MAFB	5.29604	7.27415	1449.55	0	0
Acinar	ENSG00000110318	CEP126	4.91823	5.02832	1532.89	0	0
Acinar	ENSG00000095981	KCNK16	6.02995	5.32839	1550.56	0	0
Acinar	ENSG00000183036	PCP4	5.98476	5.5729	1866.1	0	0
Acinar	ENSG00000106633	GCK	5.87552	4.20324	1450.4	0	0
Acinar	ENSG00000091592	NLRP1	5.38627	5.58247	1500.97	0	0
Acinar	ENSG00000130643	CALY	6.54653	5.66082	1973.3	0	0
Acinar	ENSG00000174871	CNIH2	6.2054	5.1623	1547.19	0	0
Acinar	ENSG00000121905	HPCA	6.66561	4.96029	1738.36	0	0
Acinar	ENSG00000153956	CACNA2D1	4.99237	5.05767	1463.85	0	0
Acinar	ENSG00000250366	TUNAR	6.16372	3.80873	1424.51	0	0
Acinar	ENSG00000186369	LINC00643	5.5743	5.08797	1423.28	0	0
Acinar	ENSG00000126266	FFAR1	5.93916	5.05067	1782	0	0
Acinar	ENSG00000160472	TMEM190	6.12068	4.88128	1732.35	0	0
Acinar	ENSG00000154277	UCHL1	5.341	6.16461	1633.79	0	0
Acinar	ENSG00000175426	PCSK1	6.14015	6.1054	1451.08	0	0
Acinar	ENSG00000089199	CHGB	5.41733	6.72793	2128.62	0	0
Acinar	ENSG00000176840	MIR7-3HG	5.89173	5.68221	1823.23	0	0
Acinar	ENSG00000171951	SCG2	6.47789	5.68581	2026.63	0	0
Acinar	ENSG00000188677	PARVB	4.90249	5.29587	1396.96	9.59866e-306	7.61494e-303
Acinar	ENSG00000072832	CRMP1	5.00859	4.61424	1390.45	2.49341e-304	1.88819e-301
Acinar	ENSG00000171551	ECEL1	5.58589	4.30567	1387.78	9.50796e-304	6.88707e-301
Acinar	ENSG00000124939	SCGB2A1	5.9772	4.02377	1372.52	1.96324e-300	1.36281e-297
Acinar	ENSG00000006747	SCIN	5.91307	3.59859	1363.52	1.77372e-298	1.18201e-295
Acinar	ENSG00000104435	STMN2	6.44118	7.71956	1357.36	3.87657e-297	2.48398e-294
Acinar	ENSG00000125851	PCSK2	6.23508	5.4652	1335.88	1.79994e-292	1.11063e-289
Acinar	ENSG00000178796	RIIAD1	5.53417	3.49855	1335.56	2.11419e-292	1.25794e-289
Acinar	ENSG00000166482	MFAP4	4.82475	5.01969	1327.43	1.23673e-290	7.10478e-288
Acinar	ENSG00000147488	ST18	5.08611	4.26825	1322.36	1.56598e-289	8.69639e-287
Acinar	ENSG00000107295	SH3GL2	4.82361	3.63609	1300.58	8.46472e-285	4.5491e-282
Acinar	ENSG00000153789	FAM92B	6.65031	3.67372	1282.21	8.2916e-281	4.31681e-278
Acinar	ENSG00000121351	IAPP	6.32118	7.53647	1262.17	1.87739e-276	9.47798e-274
Acinar	ENSG00000182759	MAFA	5.1955	4.52588	1255.97	4.18596e-275	2.05112e-272
Acinar	ENSG00000167588	GPD1	5.48069	3.34556	1251.35	4.23151e-274	2.0142e-271
Acinar	ENSG00000159713	TPPP3	3.66548	5.03043	1242.68	3.24263e-272	1.50062e-269
Acinar	ENSG00000144834	TAGLN3	5.99164	4.68583	1234.17	2.28332e-270	1.02811e-267
Acinar	ENSG00000185002	RFX6	4.80981	4.44672	1226.81	9.0746e-269	3.9785e-266
Acinar	ENSG00000227877	MRLN	5.80516	4.1173	1224.86	2.41627e-268	1.03218e-265
Acinar	ENSG00000134198	TSPAN2	5.86897	4.61993	1220.14	2.56513e-267	1.06838e-264
Acinar	ENSG00000170571	EMB	4.31759	3.97802	1218.17	6.8491e-267	2.78307e-264
Acinar	ENSG00000143001	TMEM61	4.53513	3.87514	1215.7	2.36557e-266	9.38341e-264
Acinar	ENSG00000123612	ACVR1C	5.84109	5.97079	1199.03	9.92542e-263	3.84552e-260
Acinar	ENSG00000138207	RBP4	6.77844	7.34486	1191.37	4.57222e-261	1.73121e-258
Acinar	ENSG00000117472	TSPAN1	5.41448	4.03912	1190.28	7.88593e-261	2.91955e-258
Acinar	ENSG00000117598	PLPPR5	5.8899	4.09362	1187.77	2.77762e-260	1.00598e-257
Acinar	ENSG00000179915	NRXN1	6.10621	5.46063	1182.9	3.17882e-259	1.12679e-256
Acinar	ENSG00000186493	C5orf38	5.91718	3.86804	1176.71	7.04664e-258	2.44577e-255
Acinar	ENSG00000162552	WNT4	5.46815	3.37557	1154.76	4.14339e-253	1.40875e-250
Acinar	ENSG00000131094	C1QL1	6.24435	4.79618	1149.37	6.14618e-252	2.04791e-249
Acinar	ENSG00000084764	MAPRE3	3.26078	4.3591	1146.64	2.41289e-251	7.88209e-249
Acinar	ENSG00000142615	CELA2A	-7.38173	6.57829	1133.22	1.99229e-248	6.38299e-246
Acinar	ENSG00000117152	RGS4	5.64196	4.33552	1092.73	1.25815e-239	3.95486e-237
Acinar	ENSG00000007372	PAX6	6.11761	6.79082	1083.81	1.08957e-237	3.36154e-235
Acinar	ENSG00000172137	CALB2	5.80866	3.64439	1083.39	1.34366e-237	4.07006e-235
Acinar	ENSG00000176956	LY6H	5.46151	4.29853	1078.84	1.313e-236	3.90619e-234
Acinar	ENSG00000197584	KCNMB2	5.4061	3.61131	1072.16	3.71913e-235	1.08703e-232
Acinar	ENSG00000101210	EEF1A2	5.10696	5.19845	1054.9	2.0966e-231	6.02231e-229
Acinar	ENSG00000101746	NOL4	5.25211	4.7815	1054.63	2.40466e-231	6.79012e-229
Acinar	ENSG00000004848	ARX	6.38464	4.12094	1054.22	2.94097e-231	8.16609e-229
Acinar	ENSG00000188175	HEPACAM2	6.30569	5.74613	1048.48	5.20624e-230	1.4219e-227
Acinar	ENSG00000127955	GNAI1	3.18428	4.43563	1036.13	2.52229e-227	6.77765e-225
Acinar	ENSG00000166206	GABRB3	3.91986	4.42305	1033.44	9.69769e-227	2.5645e-224
Acinar	ENSG00000176406	RIMS2	4.24274	4.13303	1019.71	9.32181e-224	2.42658e-221
Acinar	ENSG00000103528	SYT17	3.44795	3.56432	1018.54	1.67763e-223	4.29989e-221
Acinar	ENSG00000186188	FFAR4	6.4022	3.43407	1017.05	3.53946e-223	8.93446e-221
Acinar	ENSG00000054356	PTPRN	5.94315	5.26403	1010.62	8.83135e-222	2.19597e-219
Acinar	ENSG00000178104	PDE4DIP	2.67718	5.27626	1008.48	2.58143e-221	6.32449e-219
Acinar	ENSG00000016082	ISL1	6.28775	6.90088	1008.11	3.10639e-221	7.50035e-219
Acinar	ENSG00000106089	STX1A	4.41504	4.98698	1005.61	1.0814e-220	2.57373e-218
Acinar	ENSG00000095777	MYO3A	3.85763	4.0153	1000.67	1.28612e-219	3.01785e-217
Acinar	ENSG00000144619	CNTN4	4.62094	4.03284	991.477	1.27925e-217	2.96005e-215
Acinar	ENSG00000173404	INSM1	6.09248	5.84843	981.76	1.65589e-215	3.77905e-213
Acinar	ENSG00000228594	C1orf233	-3.50751	3.92149	978.743	7.49662e-215	1.68775e-212
Acinar	ENSG00000176788	BASP1	4.01004	4.89313	975.863	3.16849e-214	7.03827e-212
Acinar	ENSG00000170561	IRX2	5.97979	4.63474	973.132	1.24327e-213	2.72539e-211
Acinar	ENSG00000107281	NPDC1	3.87754	5.67845	969.477	7.74316e-213	1.67534e-210
Acinar	ENSG00000146151	HMGCLL1	6.09376	3.63843	962.984	1.99694e-211	4.26526e-209
Acinar	ENSG00000101489	CELF4	3.98769	4.71766	953.959	1.82912e-209	3.85736e-207
Acinar	ENSG00000179761	PIPOX	5.20677	3.53644	944.762	1.82529e-207	3.80116e-205
Acinar	ENSG00000162992	NEUROD1	6.19619	7.17411	941.639	8.7143e-207	1.79235e-204
Acinar	ENSG00000204347	BTBD17	5.98442	4.33251	925.215	3.23907e-203	6.58083e-201
Acinar	ENSG00000164756	SLC30A8	6.11979	6.96102	921.615	1.96399e-202	3.94217e-200
Acinar	ENSG00000100867	DHRS2	4.74266	3.48308	920.964	2.71974e-202	5.39415e-200
Acinar	ENSG00000180616	SSTR2	6.1859	5.58957	910.876	4.24128e-200	8.3129e-198
Acinar	ENSG00000176049	JAKMIP2	5.80678	3.65577	905.688	5.69139e-199	1.10254e-196
Acinar	ENSG00000101162	TUBB1	5.34389	3.14103	898.533	2.04504e-197	3.91613e-195
Acinar	ENSG00000136698	CFC1	6.18047	3.15276	896.972	4.46793e-197	8.45861e-195
Acinar	ENSG00000167964	RAB26	4.0649	4.53754	890.743	1.00994e-195	1.89052e-193
Acinar	ENSG00000141086	CTRL	-6.43291	3.81742	886.118	1.02245e-194	1.89267e-192
Acinar	ENSG00000177511	ST8SIA3	6.0575	3.23567	885.993	1.08825e-194	1.99233e-192
Acinar	ENSG00000102003	SYP	4.30123	5.09164	876.14	1.50963e-192	2.73374e-190
Acinar	ENSG00000164708	PGAM2	3.72513	3.95957	875.141	2.48845e-192	4.45781e-190
Acinar	ENSG00000145198	VWA5B2	3.84704	4.27726	871.421	1.60187e-191	2.83906e-189
Acinar	ENSG00000079102	RUNX1T1	4.77159	4.76301	868.878	5.72244e-191	1.00353e-188
Acinar	ENSG00000108309	RUNDC3A	4.41847	3.9189	868.216	7.96992e-191	1.38311e-188
Acinar	ENSG00000128266	GNAZ	4.8475	3.09705	867.013	1.45516e-190	2.49928e-188
Acinar	ENSG00000159409	CELF3	5.60679	4.11053	866.358	2.01983e-190	3.4337e-188
Acinar	ENSG00000198729	PPP1R14C	5.72793	3.48975	865.572	2.99333e-190	5.03725e-188
Acinar	ENSG00000185046	ANKS1B	5.51486	3.55262	863.011	1.07912e-189	1.79782e-187
Acinar	ENSG00000077279	DCX	4.97707	4.62795	860.285	4.22253e-189	6.96508e-187
Acinar	ENSG00000006468	ETV1	4.83386	3.52668	855.123	5.59665e-188	9.14119e-186
Acinar	ENSG00000259663	CTD-2314G24.2	5.39963	3.54092	854.946	6.11368e-188	9.88873e-186
Acinar	ENSG00000005059	CCDC109B	4.4593	3.18657	854.261	8.61217e-188	1.3796e-185
Acinar	ENSG00000104112	SCG3	4.14783	6.58017	853.231	1.44246e-187	2.2887e-185
Acinar	ENSG00000124205	EDN3	4.85919	4.83007	845.491	6.94793e-186	1.092e-183
Acinar	ENSG00000146072	TNFRSF21	3.49891	3.87868	845.198	8.04379e-186	1.25243e-183
Acinar	ENSG00000168824	NSG1	5.1564	3.07996	834.982	1.33798e-183	2.06396e-181
Acinar	ENSG00000276644	DACH1	4.71714	4.23741	827.499	5.6681e-182	8.66335e-180
Acinar	ENSG00000136750	GAD2	6.09136	5.45237	826.854	7.82706e-182	1.18544e-179
Acinar	ENSG00000185008	ROBO2	5.54179	4.7066	824.686	2.31707e-181	3.4777e-179
Acinar	ENSG00000197043	ANXA6	3.666	4.79979	823.7	3.79558e-181	5.64593e-179
Acinar	ENSG00000089356	FXYD3	4.63473	5.94361	822.659	6.39329e-181	9.42586e-179
Acinar	ENSG00000102466	FGF14	4.9941	3.74931	819.986	2.43683e-180	3.56119e-178
Acinar	ENSG00000204950	LRRC10B	6.14514	2.8199	818.524	5.06679e-180	7.34023e-178
Acinar	ENSG00000163497	FEV	5.987	3.64439	814.307	4.18214e-179	6.00642e-177
Acinar	ENSG00000125675	GRIA3	4.9115	2.7599	810.863	2.34599e-178	3.34053e-176
Acinar	ENSG00000117069	ST6GALNAC5	4.74643	3.87405	809.584	4.4502e-178	6.28309e-176
Acinar	ENSG00000091844	RGS17	4.82162	4.22581	805.228	3.93951e-177	5.51531e-175
Acinar	ENSG00000109339	MAPK10	3.36197	3.27282	801.158	3.02177e-176	4.19523e-174
Acinar	ENSG00000175535	PNLIP	-6.5386	3.69075	800.514	4.17211e-176	5.7444e-174
Acinar	ENSG00000111674	ENO2	4.398	3.29204	800.191	4.9042e-176	6.69705e-174
Acinar	ENSG00000010282	HHATL	6.50213	2.47343	800.15	5.00494e-176	6.77905e-174
Acinar	ENSG00000163499	CRYBA2	6.44599	7.89203	794.144	1.01232e-174	1.3601e-172
Acinar	ENSG00000188452	CERKL	5.88085	2.85463	793.77	1.22085e-174	1.62715e-172
Acinar	ENSG00000104760	FGL1	-5.46893	3.46705	789.33	1.12704e-173	1.4902e-171
Acinar	ENSG00000176204	LRRTM4	6.23265	2.59157	787.9	2.30549e-173	3.02436e-171
Acinar	ENSG00000108849	PPY	6.15393	11.0614	785.184	8.98242e-173	1.16912e-170
Acinar	ENSG00000147571	CRH	6.2614	4.13452	775.399	1.20494e-170	1.55615e-168
Acinar	ENSG00000182674	KCNB2	6.52	3.61719	774.712	1.69893e-170	2.17724e-168
Acinar	ENSG00000021300	PLEKHB1	2.68155	4.58049	771.913	6.89841e-170	8.77309e-168
Acinar	ENSG00000256969	RP11-320N7.2	-5.92989	2.26502	769.586	2.21167e-169	2.79139e-167
Acinar	ENSG00000145284	SCD5	2.91728	3.93738	765.612	1.61787e-168	2.02659e-166
Acinar	ENSG00000198846	TOX	4.06684	3.37529	763.029	5.8937e-168	7.32754e-166
Acinar	ENSG00000254647	INS	6.28017	15.1748	752.886	9.45949e-166	1.16737e-163
Acinar	ENSG00000173826	KCNH6	5.15742	3.30748	751.453	1.93882e-165	2.37505e-163
Acinar	ENSG00000162374	ELAVL4	6.0595	4.75173	750.733	2.77995e-165	3.38058e-163
Acinar	ENSG00000225792	AC004540.4	5.5981	2.59967	748.771	7.42354e-165	8.96204e-163
Acinar	ENSG00000124302	CHST8	5.91019	2.64625	748.716	7.62999e-165	9.14501e-163
Acinar	ENSG00000253368	TRNP1	3.6508	3.96213	748.614	8.03287e-165	9.55912e-163
Acinar	ENSG00000171450	CDK5R2	5.28636	2.51168	746.983	1.81695e-164	2.14683e-162
Acinar	ENSG00000139364	TMEM132B	4.87225	3.07297	746.821	1.97103e-164	2.31249e-162
Acinar	ENSG00000141837	CACNA1A	4.33102	4.27191	744.716	5.65379e-164	6.58686e-162
Acinar	ENSG00000135363	LMO2	4.71952	3.98047	742.885	1.41379e-163	1.63568e-161
Acinar	ENSG00000213190	MLLT11	3.54348	4.6046	741.033	3.57363e-163	4.10598e-161
Acinar	ENSG00000250387	RP11-136K7.2	5.64477	3.04693	735.591	5.45221e-162	6.22149e-160
Acinar	ENSG00000233041	PHGR1	4.90505	3.01306	732.82	2.18236e-161	2.47334e-159
Acinar	ENSG00000242732	RGAG4	4.38	3.29743	732.511	2.54741e-161	2.86755e-159
Acinar	ENSG00000169860	P2RY1	4.42727	2.96232	728.99	1.48546e-160	1.66092e-158
Acinar	ENSG00000143469	SYT14	4.25869	3.04545	728.493	1.90513e-160	2.11596e-158
Acinar	ENSG00000100604	CHGA	6.08042	9.62447	725.087	1.04824e-159	1.15654e-157
Acinar	ENSG00000146910	CNPY1	-6.50677	4.33384	723.954	1.84837e-159	2.02591e-157
Acinar	ENSG00000131437	KIF3A	2.13752	5.21387	722.875	3.17301e-159	3.45506e-157
Acinar	ENSG00000129990	SYT5	5.67782	2.64636	722.637	3.57461e-159	3.86707e-157
Acinar	ENSG00000176463	SLCO3A1	4.52911	2.83686	719.47	1.74568e-158	1.87632e-156
Acinar	ENSG00000133878	DUSP26	3.72895	4.71564	712.571	5.52065e-157	5.89578e-155
Acinar	ENSG00000019505	SYT13	4.66462	3.77436	712.074	7.08328e-157	7.5164e-155
Acinar	ENSG00000148798	INA	5.62237	3.19529	712.016	7.29133e-157	7.6882e-155
Acinar	ENSG00000204140	CLPSL1	-4.2127	3.36333	709.046	3.22628e-156	3.38049e-154
Acinar	ENSG00000075461	CACNG4	5.36324	2.51076	705.243	2.1653e-155	2.25462e-153
Acinar	ENSG00000168785	TSPAN5	3.2189	4.36071	704.926	2.5387e-155	2.627e-153
Acinar	ENSG00000108370	RGS9	5.95714	4.38863	704.024	3.98708e-155	4.10029e-153
Acinar	ENSG00000105270	CLIP3	3.99938	2.96912	702.052	1.07032e-154	1.09395e-152
Acinar	ENSG00000134548	SPX	-5.42624	4.93639	701.679	1.29e-154	1.31045e-152
Acinar	ENSG00000171533	MAP6	5.04685	3.95933	700.455	2.38079e-154	2.40388e-152
Acinar	ENSG00000172348	RCAN2	4.34846	2.84882	696.64	1.60831e-153	1.61412e-151
Acinar	ENSG00000203879	GDI1	2.03808	5.17822	696.373	1.83857e-153	1.83417e-151
Acinar	ENSG00000235531	MSC-AS1	-4.6821	1.22108	695.523	2.81398e-153	2.79053e-151
Acinar	ENSG00000134962	KLB	-3.58789	3.43068	694.719	4.20883e-153	4.14906e-151
Acinar	ENSG00000099812	MISP	4.81867	2.95949	694.583	4.50573e-153	4.41562e-151
Acinar	ENSG00000126733	DACH2	5.21376	2.35669	692.32	1.39893e-152	1.36294e-150
Acinar	ENSG00000078018	MAP2	3.7272	5.04585	686.997	2.01095e-151	1.94782e-149
Acinar	ENSG00000124194	GDAP1L1	5.53974	2.67071	686.106	3.14184e-151	3.02561e-149
Acinar	ENSG00000169302	STK32A	3.90234	2.88224	683.479	1.17021e-150	1.12044e-148
Acinar	ENSG00000244067	GSTA2	-5.88177	3.39641	680.92	4.21616e-150	4.01378e-148
Acinar	ENSG00000205364	MT1M	-5.41232	5.63441	679.659	7.92843e-150	7.50498e-148
Acinar	ENSG00000076554	TPD52	2.14858	6.7372	677.207	2.70622e-149	2.54721e-147
Acinar	ENSG00000087258	GNAO1	5.25211	3.85966	675.196	7.40541e-149	6.93113e-147
Acinar	ENSG00000003987	MTMR7	3.31881	2.72418	674.678	9.60088e-149	8.93579e-147
Acinar	ENSG00000182836	PLCXD3	6.3678	5.08675	674.624	9.86182e-149	9.12767e-147
Acinar	ENSG00000166111	SVOP	5.15937	2.58067	670.619	7.32761e-148	6.74464e-146
Acinar	ENSG00000159248	GJD2	5.42294	2.34525	668.747	1.87078e-147	1.71249e-145
Acinar	ENSG00000137285	TUBB2B	4.02831	5.57114	666.778	5.01575e-147	4.56625e-145
Acinar	ENSG00000137731	FXYD2	3.24988	7.79788	666.368	6.1591e-147	5.57666e-145
Acinar	ENSG00000120251	GRIA2	5.17917	2.73364	662.77	3.73181e-146	3.36065e-144
Acinar	ENSG00000166959	MS4A8	5.14576	2.85037	662.139	5.11757e-146	4.5838e-144
Acinar	ENSG00000170091	HMP19	5.76076	2.33458	660.188	1.35964e-145	1.21131e-143
Acinar	ENSG00000114757	PEX5L	4.43174	2.85298	658.016	4.03513e-145	3.57581e-143
Acinar	ENSG00000171798	KNDC1	4.91788	2.87587	657.309	5.74778e-145	5.06657e-143
Acinar	ENSG00000172023	REG1B	-6.34393	4.15016	657.192	6.0945e-145	5.34392e-143
Acinar	ENSG00000122694	GLIPR2	4.56393	4.39416	656.884	7.11245e-145	6.20384e-143
Acinar	ENSG00000008735	MAPK8IP2	4.60986	2.61462	655.399	1.49578e-144	1.2979e-142
Acinar	ENSG00000131096	PYY	6.64228	6.60825	653.596	3.69082e-144	3.18596e-142
Acinar	ENSG00000125820	NKX2-2	4.03496	4.96814	653.395	4.08185e-144	3.50534e-142
Acinar	ENSG00000058404	CAMK2B	3.77499	4.48885	651.072	1.30581e-143	1.11563e-141
Acinar	ENSG00000153446	C16orf89	-5.6661	4.32722	650.875	1.44141e-143	1.2252e-141
Acinar	ENSG00000050438	SLC4A8	4.7216	3.93192	648.351	5.10319e-143	4.3157e-141
Acinar	ENSG00000240694	PNMA2	5.71628	3.29127	646.813	1.10202e-142	9.27257e-141
Acinar	ENSG00000185176	AQP12B	-4.78437	1.78285	646.538	1.26479e-142	1.05886e-140
Acinar	ENSG00000101333	PLCB4	4.01092	3.67407	644.22	4.03699e-142	3.36282e-140
Acinar	ENSG00000117020	AKT3	2.83257	4.21181	636.318	2.1124e-140	1.75087e-138
Acinar	ENSG00000258986	TMEM179	5.59661	2.10836	631.057	2.94468e-139	2.42863e-137
Acinar	ENSG00000099864	PALM	3.74196	3.35149	630.241	4.43016e-139	3.63579e-137
Acinar	ENSG00000170549	IRX1	6.34025	2.07656	629.242	7.30491e-139	5.96568e-137
Acinar	ENSG00000115461	IGFBP5	5.19734	6.19909	627.316	1.91699e-138	1.55791e-136
Acinar	ENSG00000145642	FAM159B	5.81477	2.5987	626.982	2.26621e-138	1.83277e-136
Acinar	ENSG00000248771	LINC01207	-4.22502	2.75473	623.446	1.33153e-137	1.07166e-135
Acinar	ENSG00000188761	BCL2L15	-5.06831	2.61366	620.593	5.55751e-137	4.45135e-135
Acinar	ENSG00000177679	SRRM3	4.98574	2.43058	620.122	7.03358e-137	5.60667e-135
Acinar	ENSG00000184945	AQP12A	-4.6364	1.16567	619.838	8.1099e-137	6.43385e-135
Acinar	ENSG00000007516	BAIAP3	4.00429	3.95629	617.699	2.36711e-136	1.869e-134
Acinar	ENSG00000168280	KIF5C	5.88671	5.00359	617.536	2.56858e-136	2.01852e-134
Acinar	ENSG00000182050	MGAT4C	5.02678	2.31933	617.285	2.91197e-136	2.27763e-134
Acinar	ENSG00000136574	GATA4	-4.68497	3.29421	613.272	2.17263e-135	1.6914e-133
Acinar	ENSG00000105290	APLP1	3.18515	5.61367	613.073	2.40106e-135	1.86054e-133
Acinar	ENSG00000075043	KCNQ2	5.50657	2.62355	606.364	6.91125e-134	5.33062e-132
Acinar	ENSG00000196169	KIF19	4.99974	2.31938	606.296	7.15159e-134	5.49058e-132
Acinar	ENSG00000053438	NNAT	4.67383	4.8277	605.215	1.22873e-133	9.39024e-132
Acinar	ENSG00000145934	TENM2	4.58983	2.66202	603.84	2.44657e-133	1.86118e-131
Acinar	ENSG00000177191	B3GNT8	3.93407	2.67201	603.79	2.50872e-133	1.89978e-131
Acinar	ENSG00000169855	ROBO1	3.99752	3.51397	600.65	1.20899e-132	9.11393e-131
Acinar	ENSG00000160991	ORAI2	2.09734	4.31072	599.723	1.92292e-132	1.44306e-130
Acinar	ENSG00000137726	FXYD6	4.19636	5.48753	595.954	1.27018e-131	9.48931e-130
Acinar	ENSG00000275896	PRSS2	-7.81278	13.2175	595.939	1.27987e-131	9.51903e-130
Acinar	ENSG00000106331	PAX4	5.61504	2.94538	594.866	2.18993e-131	1.62152e-129
Acinar	ENSG00000067057	PFKP	3.52276	3.00472	594.553	2.56247e-131	1.88897e-129
Acinar	ENSG00000157542	KCNJ6	6.45154	4.7183	593.979	3.41496e-131	2.50631e-129
Acinar	ENSG00000178473	UCN3	5.81348	3.58343	592.207	8.29676e-131	6.06245e-129
Acinar	ENSG00000100314	CABP7	4.36188	3.02065	591.661	1.09033e-130	7.93229e-129
Acinar	ENSG00000127585	FBXL16	5.47006	2.06947	586.744	1.28003e-129	9.27188e-128
Acinar	ENSG00000118271	TTR	5.57478	11.8515	585.57	2.30383e-129	1.66155e-127
Acinar	ENSG00000174844	DNAH12	4.38211	2.24551	583.894	5.33427e-129	3.83056e-127
Acinar	ENSG00000166963	MAP1A	3.73609	3.62484	583.57	6.2731e-129	4.4854e-127
Acinar	ENSG00000135324	MRAP2	5.21945	2.4791	580.985	2.29025e-128	1.63058e-126
Acinar	ENSG00000143797	MBOAT2	3.31936	3.50949	579.704	4.34956e-128	3.08356e-126
Acinar	ENSG00000196542	SPTSSB	3.36871	3.71731	578.145	9.49836e-128	6.7052e-126
Acinar	ENSG00000167552	TUBA1A	4.41707	7.84198	576.129	2.60628e-127	1.83209e-125
Acinar	ENSG00000149735	GPHA2	-4.94008	2.85335	574.801	5.06936e-127	3.54855e-125
Acinar	ENSG00000010310	GIPR	3.96176	3.51431	574.578	5.66971e-127	3.95219e-125
Acinar	ENSG00000228536	RP11-392O17.1	-5.70139	2.29909	572.035	2.02602e-126	1.4064e-124
Acinar	ENSG00000136111	TBC1D4	2.04332	4.6086	571.663	2.4405e-126	1.68709e-124
Acinar	ENSG00000156113	KCNMA1	2.80981	4.56298	570.647	4.06075e-126	2.79554e-124
Acinar	ENSG00000204323	SMIM5	3.64226	2.62652	568.652	1.10279e-125	7.56068e-124
Acinar	ENSG00000248859	LINC01574	6.88975	2.1084	567.415	2.04921e-125	1.39918e-123
Acinar	ENSG00000157005	SST	6.79779	13.1197	566.307	3.5695e-125	2.42726e-123
Acinar	ENSG00000137142	IGFBPL1	5.74436	2.08801	565.042	6.72773e-125	4.55626e-123
Acinar	ENSG00000122859	NEUROG3	5.6145	2.20387	560.66	6.04079e-124	4.07448e-122
Acinar	ENSG00000130037	KCNA5	4.78052	2.03317	559.974	8.51577e-124	5.72068e-122
Acinar	ENSG00000155816	FMN2	4.26402	2.49759	558.938	1.43082e-123	9.57326e-122
Acinar	ENSG00000186310	NAP1L3	3.84331	3.05306	555.455	8.18999e-123	5.45781e-121
Acinar	ENSG00000131711	MAP1B	5.06373	6.22973	554.372	1.40885e-122	9.35115e-121
Acinar	ENSG00000179751	SYCN	-6.34028	13.0787	552.354	3.87126e-122	2.55934e-120
Acinar	ENSG00000136040	PLXNC1	3.34283	3.85843	552.333	3.91252e-122	2.57639e-120
Acinar	ENSG00000187021	PNLIPRP1	-7.24304	9.59883	550.275	1.09708e-121	7.1958e-120
Acinar	ENSG00000154027	AK5	5.51243	1.93801	549.518	1.6028e-121	1.04716e-119
Acinar	ENSG00000102109	PCSK1N	6.18429	9.6876	548.239	3.0417e-121	1.97948e-119
Acinar	ENSG00000183023	SLC8A1	4.76836	2.5892	546.885	5.99296e-121	3.88493e-119
Acinar	ENSG00000134333	LDHA	-2.31272	6.68579	546.732	6.4701e-121	4.17798e-119
Acinar	ENSG00000187634	SAMD11	4.36449	2.90268	545.588	1.14774e-120	7.38279e-119
Acinar	ENSG00000166257	SCN3B	3.78985	2.60355	545.234	1.3704e-120	8.78108e-119
Acinar	ENSG00000248810	RP11-362F19.1	-5.73497	4.45149	543.728	2.91302e-120	1.85942e-118
Acinar	ENSG00000154122	ANKH	2.44146	3.37225	542.87	4.47854e-120	2.84781e-118
Acinar	ENSG00000132718	SYT11	5.00785	3.71618	542.101	6.58076e-120	4.16865e-118
Acinar	ENSG00000151726	ACSL1	5.07582	4.49424	540.049	1.84003e-119	1.16117e-117
Acinar	ENSG00000137392	CLPS	-6.56577	16.6826	539.64	2.25814e-119	1.41965e-117
Acinar	ENSG00000084731	KIF3C	3.17147	2.74952	537.855	5.52185e-119	3.45842e-117
Acinar	ENSG00000172426	RSPH9	4.38434	2.55597	537.41	6.90052e-119	4.30572e-117
Acinar	ENSG00000049089	COL9A2	2.6049	3.60605	537.054	8.24768e-119	5.1271e-117
Acinar	ENSG00000133401	PDZD2	3.89246	3.07739	536.817	9.28681e-119	5.75161e-117
Acinar	ENSG00000241990	PRR34-AS1	3.47467	2.42472	536.647	1.01118e-118	6.23937e-117
Acinar	ENSG00000141744	PNMT	5.52048	2.14071	534.862	2.47238e-118	1.51992e-116
Acinar	ENSG00000135835	KIAA1614	4.23584	2.44355	534.249	3.36196e-118	2.0592e-116
Acinar	ENSG00000102781	KATNAL1	3.07275	3.30955	528.42	6.23146e-117	3.80279e-115
Acinar	ENSG00000091137	SLC26A4	4.99033	2.58997	528.252	6.7811e-117	4.12311e-115
Acinar	ENSG00000262179	RP1-302G2.5	-6.20056	1.33414	527.791	8.542e-117	5.1749e-115
Acinar	ENSG00000126218	F10	3.03926	5.08194	523.572	7.06885e-116	4.26692e-114
Acinar	ENSG00000013293	SLC7A14	5.41256	2.54323	522.642	1.1266e-115	6.77585e-114
Acinar	ENSG00000132563	REEP2	4.59405	2.59254	520.141	3.94296e-115	2.36294e-113
Acinar	ENSG00000163995	ABLIM2	3.25193	3.02691	516.93	1.96954e-114	1.17608e-112
Acinar	ENSG00000065911	MTHFD2	-2.23286	4.40021	514.926	5.37693e-114	3.19928e-112
Acinar	ENSG00000157388	CACNA1D	3.84871	3.32066	513.713	9.87002e-114	5.85176e-112
Acinar	ENSG00000115263	GCG	6.86243	12.5819	513.291	1.21935e-113	7.20366e-112
Acinar	ENSG00000103154	NECAB2	5.88027	2.2483	512.981	1.42436e-113	8.3851e-112
Acinar	ENSG00000151067	CACNA1C	4.56423	2.87751	509.122	9.84718e-113	5.77655e-111
Acinar	ENSG00000153814	JAZF1	3.4303	3.03392	508.255	1.51976e-112	8.88391e-111
Acinar	ENSG00000114529	C3orf52	-3.56499	2.46562	508.207	1.55685e-112	9.06891e-111
Acinar	ENSG00000036828	CASR	3.78063	3.7491	504.042	1.25461e-111	7.28285e-110
Acinar	ENSG00000153253	SCN3A	5.7856	3.03512	503.674	1.50893e-111	8.72873e-110
Acinar	ENSG00000176749	CDK5R1	3.37265	3.27213	503.125	1.98653e-111	1.14518e-109
Acinar	ENSG00000168067	MAP4K2	2.38869	3.62698	502.571	2.62106e-111	1.50575e-109
Acinar	ENSG00000155980	KIF5A	5.76461	2.07749	502.334	2.95268e-111	1.69044e-109
Acinar	ENSG00000185818	NAT8L	3.45149	2.82718	502.307	2.99279e-111	1.70753e-109
Acinar	ENSG00000205358	MT1H	-7.32441	10.9487	500.593	7.06389e-111	4.01653e-109
Acinar	ENSG00000164647	STEAP1	-4.74175	3.38136	498.13	2.42624e-110	1.37487e-108
Acinar	ENSG00000142789	CELA3A	-7.06452	14.5439	498.117	2.44151e-110	1.37883e-108
Acinar	ENSG00000196104	SPOCK3	5.57649	2.27614	498.006	2.58127e-110	1.45284e-108
Acinar	ENSG00000185352	HS6ST3	4.9971	2.70529	497.186	3.89318e-110	2.18385e-108
Acinar	ENSG00000166313	APBB1	2.35062	4.25856	495.605	8.59294e-110	4.80397e-108
Acinar	ENSG00000260838	RP11-531A24.3	5.53945	2.34833	495.577	8.7153e-110	4.85609e-108
Acinar	ENSG00000143954	REG3G	-6.72392	11.1239	495.447	9.30452e-110	5.16711e-108
Acinar	ENSG00000128872	TMOD2	2.3091	3.78679	494.448	1.53468e-109	8.49426e-108
Acinar	ENSG00000171224	C10orf35	2.33298	4.41838	492.398	4.28686e-109	2.36487e-107
Acinar	ENSG00000060709	RIMBP2	4.1005	4.0265	490.832	9.39443e-109	5.16539e-107
Acinar	ENSG00000142677	IL22RA1	-4.75594	3.46968	490.265	1.2478e-108	6.83828e-107
Acinar	ENSG00000165914	TTC7B	3.73484	2.75908	490.206	1.28553e-108	7.02193e-107
Acinar	ENSG00000197181	PIWIL2	-4.08531	1.31807	487.881	4.12082e-108	2.24356e-106
Acinar	ENSG00000169385	RNASE2	-5.34417	2.63855	487.753	4.39183e-108	2.38332e-106
Acinar	ENSG00000099260	PALMD	3.0085	3.46489	487.182	5.84834e-108	3.16342e-106
Acinar	ENSG00000135127	CCDC64	3.30812	2.5961	485.902	1.11021e-107	5.98578e-106
Acinar	ENSG00000109472	CPE	2.52802	8.46778	485.595	1.29535e-107	6.96147e-106
Acinar	ENSG00000103723	AP3B2	3.88782	2.1842	485.091	1.66697e-107	8.92983e-106
Acinar	ENSG00000179954	SSC5D	3.71984	2.25943	483.762	3.24512e-107	1.73281e-105
Acinar	ENSG00000106236	NPTX2	5.73653	2.5814	482.483	6.15699e-107	3.27717e-105
Acinar	ENSG00000223802	CERS1	3.96326	2.0644	481.31	1.10862e-106	5.88202e-105
Acinar	ENSG00000107331	ABCA2	3.0905	3.16609	480.886	1.37084e-106	7.25024e-105
Acinar	ENSG00000196090	PTPRT	5.52038	2.94604	479.505	2.73783e-106	1.44342e-104
Acinar	ENSG00000237767	LINC01370	5.64849	1.95093	479.403	2.88198e-106	1.51463e-104
Acinar	ENSG00000145087	STXBP5L	4.27914	2.57994	477.362	8.01307e-106	4.19804e-104
Acinar	ENSG00000155099	TMEM55A	2.56501	4.10268	477.236	8.53654e-106	4.45827e-104
Acinar	ENSG00000134532	SOX5	3.029	3.24075	477.182	8.77042e-106	4.5661e-104
Acinar	ENSG00000117477	CCDC181	3.75218	2.7851	476.732	1.09845e-105	5.70098e-104
Acinar	ENSG00000186469	GNG2	4.43923	4.34342	476.668	1.1346e-105	5.87035e-104
Acinar	ENSG00000219073	CELA3B	-6.6967	12.4487	475.422	2.11809e-105	1.09249e-103
Acinar	ENSG00000125895	TMEM74B	5.29114	1.75422	473.756	4.88027e-105	2.50942e-103
Acinar	ENSG00000109452	INPP4B	3.32797	2.5124	473.567	5.36535e-105	2.75036e-103
Acinar	ENSG00000135905	DOCK10	3.85906	2.24271	473.113	6.73488e-105	3.44181e-103
Acinar	ENSG00000104635	SLC39A14	-2.39019	5.43522	472.567	8.85395e-105	4.51091e-103
Acinar	ENSG00000011347	SYT7	3.62087	4.07473	471.923	1.22271e-104	6.21046e-103
Acinar	ENSG00000171476	HOPX	4.41899	3.75238	471.754	1.33096e-104	6.73976e-103
Acinar	ENSG00000092964	DPYSL2	3.43141	4.81399	470.572	2.40575e-104	1.21454e-102
Acinar	ENSG00000077063	CTTNBP2	2.66083	4.68761	470.137	2.99192e-104	1.5059e-102
Acinar	ENSG00000179921	GPBAR1	4.59401	2.67485	467.354	1.20645e-103	6.05405e-102
Acinar	ENSG00000165802	NSMF	2.3466	3.65958	465.654	2.82858e-103	1.41514e-101
Acinar	ENSG00000147231	CXorf57	2.7787	2.99763	464.738	4.47478e-103	2.23203e-101
Acinar	ENSG00000116106	EPHA4	4.00758	2.47892	463.856	6.96387e-103	3.46322e-101
Acinar	ENSG00000103034	NDRG4	3.0452	3.6835	460.879	3.09506e-102	1.53463e-100
Acinar	ENSG00000164076	CAMKV	5.03155	1.64849	460.307	4.12233e-102	2.03792e-100
Acinar	ENSG00000132872	SYT4	6.05147	4.27114	459.346	6.67172e-102	3.28849e-100
Acinar	ENSG00000064655	EYA2	3.98193	1.91179	457.355	1.80956e-101	8.89299e-100
Acinar	ENSG00000050030	KIAA2022	3.27252	3.48651	456.04	3.49703e-101	1.71355e-99
Acinar	ENSG00000158856	DMTN	3.41156	3.74711	455.534	4.50568e-101	2.20131e-99
Acinar	ENSG00000178695	KCTD12	2.92494	4.55178	455.063	5.70488e-101	2.77904e-99
Acinar	ENSG00000184384	MAML2	2.04483	3.76138	454.957	6.01705e-101	2.92257e-99
Acinar	ENSG00000061656	SPAG4	-3.97104	2.89965	453.202	1.44937e-100	7.01932e-99
Acinar	ENSG00000072195	SPEG	3.48844	2.68901	451.818	2.90097e-100	1.40088e-98
Acinar	ENSG00000115386	REG1A	-7.6844	13.4672	448.719	1.37059e-99	6.59945e-98
Acinar	ENSG00000179097	HTR1F	5.23362	2.25901	447.275	2.82591e-99	1.35676e-97
Acinar	ENSG00000139211	AMIGO2	4.80937	2.92042	446.524	4.11746e-99	1.97118e-97
Acinar	ENSG00000009950	MLXIPL	3.51026	4.70428	445.947	5.49752e-99	2.62432e-97
Acinar	ENSG00000268518	CTD-2545M3.8	4.58079	1.99973	445.415	7.17634e-99	3.41594e-97
Acinar	ENSG00000143630	HCN3	2.88566	2.17487	444.014	1.44804e-98	6.87305e-97
Acinar	ENSG00000148541	FAM13C	3.05095	2.58105	443.595	1.78682e-98	8.45693e-97
Acinar	ENSG00000164929	BAALC	4.52244	2.13554	442.644	2.87735e-98	1.35798e-96
Acinar	ENSG00000105245	NUMBL	3.41826	2.93637	442.464	3.14838e-98	1.4817e-96
Acinar	ENSG00000235863	B3GALT4	2.55267	2.83598	439.613	1.31426e-97	6.16775e-96
Acinar	ENSG00000115419	GLS	2.6082	6.04139	439.479	1.4055e-97	6.57742e-96
Acinar	ENSG00000134323	MYCN	4.50427	1.94994	438.82	1.95508e-97	9.12369e-96
Acinar	ENSG00000075213	SEMA3A	4.84927	2.74916	436.686	5.69901e-97	2.65211e-95
Acinar	ENSG00000162687	KCNT2	3.64106	2.60253	435.706	9.31166e-97	4.32123e-95
Acinar	ENSG00000142549	IGLON5	4.9813	1.65843	435.359	1.10788e-96	5.12701e-95
Acinar	ENSG00000120645	IQSEC3	3.98151	2.02956	435.349	1.11333e-96	5.13799e-95
Acinar	ENSG00000055118	KCNH2	3.29754	3.91218	434.756	1.49849e-96	6.89635e-95
Acinar	ENSG00000070985	TRPM5	5.13643	2.44416	434.232	1.94944e-96	8.94701e-95
Acinar	ENSG00000060982	BCAT1	-4.00476	5.5766	434.108	2.0736e-96	9.49069e-95
Acinar	ENSG00000105696	TMEM59L	5.29652	1.49314	433.909	2.29117e-96	1.04578e-94
Acinar	ENSG00000205856	C22orf42	5.45694	2.5431	433.269	3.15715e-96	1.43711e-94
Acinar	ENSG00000157064	NMNAT2	5.25268	1.71381	431.961	6.08141e-96	2.76066e-94
Acinar	ENSG00000129757	CDKN1C	2.27455	7.37265	431.606	7.26572e-96	3.28932e-94
Acinar	ENSG00000256196	RP11-881M11.4	5.79082	1.81634	431.201	8.90014e-96	4.01833e-94
Acinar	ENSG00000183508	FAM46C	-2.06489	6.25665	431.107	9.33202e-96	4.20193e-94
Acinar	ENSG00000133640	LRRIQ1	2.23939	3.78603	430.864	1.05378e-95	4.73208e-94
Acinar	ENSG00000169750	RAC3	2.34743	3.23419	429.669	1.91801e-95	8.5898e-94
Acinar	ENSG00000259347	RP11-798K3.2	-5.82634	1.88567	429.461	2.12907e-95	9.50948e-94
Acinar	ENSG00000175329	ISX	5.75292	1.71234	428.897	2.82525e-95	1.25852e-93
Acinar	ENSG00000130222	GADD45G	2.90462	4.31961	428.66	3.18142e-95	1.4134e-93
Acinar	ENSG00000229891	LINC01315	6.23661	2.92954	427.407	5.96067e-95	2.64109e-93
Acinar	ENSG00000131584	ACAP3	2.33371	3.54712	425.726	1.38422e-94	6.117e-93
Acinar	ENSG00000170382	LRRN2	5.2875	2.42279	425.708	1.39638e-94	6.15442e-93
Acinar	ENSG00000008517	IL32	-4.17299	7.81489	425.664	1.42786e-94	6.27658e-93
Acinar	ENSG00000130477	UNC13A	5.04202	2.30459	425.587	1.48352e-94	6.50405e-93
Acinar	ENSG00000198736	MSRB1	-3.11462	6.55672	425.483	1.56295e-94	6.83433e-93
Acinar	ENSG00000117602	RCAN3	1.5598	5.09016	424.751	2.25637e-94	9.84061e-93
Acinar	ENSG00000170959	DCDC1	3.76385	4.19903	424.475	2.59107e-94	1.12708e-92
Acinar	ENSG00000152578	GRIA4	4.58623	1.99895	423.132	5.07879e-94	2.20345e-92
Acinar	ENSG00000133019	CHRM3	-2.11054	3.53782	422.433	7.20753e-94	3.1189e-92
Acinar	ENSG00000254402	LRRC24	2.93746	2.74319	421.522	1.13824e-93	4.91272e-92
Acinar	ENSG00000156299	TIAM1	3.14388	3.04812	420.085	2.33843e-93	1.00667e-91
Acinar	ENSG00000174482	LINGO2	5.12574	2.01292	419.889	2.57945e-93	1.10757e-91
Acinar	ENSG00000124074	ENKD1	-2.83851	5.76648	419.46	3.19932e-93	1.3702e-91
Acinar	ENSG00000186487	MYT1L	5.29612	3.16143	418.921	4.19007e-93	1.78991e-91
Acinar	ENSG00000156011	PSD3	1.96822	4.45168	418.733	4.60488e-93	1.96208e-91
Acinar	ENSG00000143603	KCNN3	4.60374	1.76689	418.707	4.66498e-93	1.98261e-91
Acinar	ENSG00000171435	KSR2	2.24852	2.86371	417.735	7.59278e-93	3.21872e-91
Acinar	ENSG00000174939	ASPHD1	2.62702	3.30493	417.311	9.39243e-93	3.97152e-91
Acinar	ENSG00000143171	RXRG	5.20677	1.94132	417.023	1.08519e-92	4.57701e-91
Acinar	ENSG00000165548	TMEM63C	4.10184	2.03664	416.723	1.26074e-92	5.304e-91
Acinar	ENSG00000183734	ASCL2	4.18911	5.53382	416.018	1.79546e-92	7.5346e-91
Acinar	ENSG00000123836	PFKFB2	2.74203	2.85777	415.918	1.88814e-92	7.90361e-91
Acinar	ENSG00000179796	LRRC3B	-3.89121	3.18816	415.683	2.12348e-92	8.86647e-91
Acinar	ENSG00000153002	CPB1	-6.34468	10.1632	414.267	4.31821e-92	1.79853e-90
Acinar	ENSG00000108852	MPP2	3.56461	1.97301	413.461	6.46902e-92	2.68763e-90
Acinar	ENSG00000143801	PSEN2	-1.78121	4.92861	412.944	8.38171e-92	3.47361e-90
Acinar	ENSG00000183186	C2CD4C	3.57355	2.27866	412.139	1.2548e-91	5.18732e-90
Acinar	ENSG00000165023	DIRAS2	5.55385	1.90306	412.056	1.30817e-91	5.39457e-90
Acinar	ENSG00000171444	MCC	2.89405	2.62333	411.621	1.62696e-91	6.69263e-90
Acinar	ENSG00000137942	FNBP1L	1.63718	6.56298	411.258	1.95111e-91	8.00626e-90
Acinar	ENSG00000149294	NCAM1	4.1477	4.1579	410.959	2.26703e-91	9.27979e-90
Acinar	ENSG00000108187	PBLD	-2.49478	4.37599	410.547	2.78669e-91	1.1379e-89
Acinar	ENSG00000134285	FKBP11	-3.46666	7.36481	410.37	3.0447e-91	1.24021e-89
Acinar	ENSG00000197635	DPP4	2.40973	4.28152	409.995	3.67383e-91	1.49283e-89
Acinar	ENSG00000240204	SMKR1	3.33018	2.4621	409.93	3.79579e-91	1.53863e-89
Acinar	ENSG00000166897	ELFN2	4.28484	1.88625	408.389	8.21958e-91	3.32374e-89
Acinar	ENSG00000133958	UNC79	3.0664	2.34218	405.603	3.32049e-90	1.33945e-88
Acinar	ENSG00000066629	EML1	1.69946	3.47219	405.539	3.42897e-90	1.37987e-88
Acinar	ENSG00000150907	FOXO1	2.07006	4.54195	403.63	8.92663e-90	3.58356e-88
Acinar	ENSG00000163449	TMEM169	4.85125	1.80292	403.567	9.21411e-90	3.69008e-88
Acinar	ENSG00000236154	RP11-343J3.2	5.88843	3.25477	403.42	9.92078e-90	3.96355e-88
Acinar	ENSG00000135919	SERPINE2	3.52181	4.01802	403.395	1.00445e-89	4.00339e-88
Acinar	ENSG00000151552	QDPR	1.60198	6.36035	402.831	1.33269e-89	5.29896e-88
Acinar	ENSG00000215644	GCGR	5.4944	1.7869	401.035	3.2788e-89	1.30059e-87
Acinar	ENSG00000189409	MMP23B	3.15371	2.83581	400.259	4.83565e-89	1.91359e-87
Acinar	ENSG00000227051	C14orf132	2.927	4.33176	399.58	6.79676e-89	2.68327e-87
Acinar	ENSG00000196132	MYT1	4.69704	2.82812	398.079	1.44215e-88	5.67994e-87
Acinar	ENSG00000186577	C6orf1	1.87909	3.29978	397.423	2.00421e-88	7.87503e-87
Acinar	ENSG00000123570	RAB9B	3.06343	2.69014	396.918	2.5812e-88	1.01183e-86
Acinar	ENSG00000135272	MDFIC	3.78716	3.32062	396.675	2.9157e-88	1.14027e-86
Acinar	ENSG00000167414	GNG8	5.77401	1.77014	396.258	3.59428e-88	1.40236e-86
Acinar	ENSG00000154080	CHST9	2.71586	5.65851	395.247	5.96631e-88	2.3224e-86
Acinar	ENSG00000018236	CNTN1	4.94573	3.97786	394.442	8.92931e-88	3.46765e-86
Acinar	ENSG00000168243	GNG4	4.11888	4.6449	393.147	1.709e-87	6.62138e-86
Acinar	ENSG00000138796	HADH	2.70043	6.77256	393.029	1.8132e-87	7.00881e-86
Acinar	ENSG00000205929	C21orf62	2.90114	2.69622	390.636	6.01867e-87	2.32109e-85
Acinar	ENSG00000138798	EGF	-6.07473	3.32056	390.125	7.77575e-87	2.99178e-85
Acinar	ENSG00000187513	GJA4	-4.20621	4.16684	390.116	7.81024e-87	2.99812e-85
Acinar	ENSG00000059915	PSD	4.45196	3.81988	389.901	8.69635e-87	3.3306e-85
Acinar	ENSG00000162482	AKR7A3	-5.83581	7.41319	388.797	1.51289e-86	5.78092e-85
Acinar	ENSG00000100505	TRIM9	4.44301	1.83292	388.2	2.04101e-86	7.78104e-85
Acinar	ENSG00000146038	DCDC2	2.13527	5.89051	388.007	2.24725e-86	8.54777e-85
Acinar	ENSG00000131389	SLC6A6	3.19632	2.33817	387.35	3.12416e-86	1.18562e-84
Acinar	ENSG00000106772	PRUNE2	4.65355	2.68284	385.255	8.92926e-86	3.38094e-84
Acinar	ENSG00000136842	TMOD1	-2.66446	2.35856	385.213	9.1215e-86	3.4459e-84
Acinar	ENSG00000160325	CACFD1	1.54231	4.02969	384.394	1.37495e-85	5.18249e-84
Acinar	ENSG00000124493	GRM4	6.07953	2.31442	383.65	1.99693e-85	7.50991e-84
Acinar	ENSG00000008300	CELSR3	3.69867	1.87493	383.492	2.16097e-85	8.10852e-84
Acinar	ENSG00000160298	C21orf58	3.30819	4.86334	382.61	3.3623e-85	1.25878e-83
Acinar	ENSG00000118922	KLF12	2.38763	2.54136	382.524	3.51192e-85	1.31185e-83
Acinar	ENSG00000078725	BRINP1	-2.09012	2.35581	381.199	6.82073e-85	2.54213e-83
Acinar	ENSG00000113361	CDH6	3.43406	2.49788	381.162	6.9492e-85	2.58423e-83
Acinar	ENSG00000125827	TMX4	1.37872	5.10374	380.986	7.58918e-85	2.81594e-83
Acinar	ENSG00000166920	C15orf48	3.57643	4.57889	380.892	7.95575e-85	2.9454e-83
Acinar	ENSG00000097021	ACOT7	2.04538	3.16092	380.543	9.47943e-85	3.50171e-83
Acinar	ENSG00000243449	C4orf48	3.7825	6.30638	380.441	9.97469e-85	3.67651e-83
Acinar	ENSG00000112379	ARFGEF3	2.45404	5.28387	379.857	1.33656e-84	4.91548e-83
Acinar	ENSG00000272636	DOC2B	-3.12798	0.951621	379.058	1.99593e-84	7.32428e-83
Acinar	ENSG00000154319	FAM167A	3.3384	2.32798	378.88	2.18203e-84	7.98958e-83
Acinar	ENSG00000169174	PCSK9	-4.02151	2.89694	378.281	2.9465e-84	1.0765e-82
Acinar	ENSG00000163875	MEAF6	1.61527	6.65299	378.14	3.16138e-84	1.15249e-82
Acinar	ENSG00000010404	IDS	2.21742	5.13414	377.881	3.59957e-84	1.30936e-82
Acinar	ENSG00000183783	KCTD8	5.35179	1.6387	377.81	3.73026e-84	1.35395e-82
Acinar	ENSG00000138100	TRIM54	-4.22417	1.13544	377.642	4.05756e-84	1.46954e-82
Acinar	ENSG00000118495	PLAGL1	2.80577	7.01096	377.591	4.16398e-84	1.50481e-82
Acinar	ENSG00000154978	VOPP1	2.03721	3.8654	376.44	7.41286e-84	2.67312e-82
Acinar	ENSG00000196507	TCEAL3	1.46876	5.42906	376.211	8.31508e-84	2.99199e-82
Acinar	ENSG00000105808	RASA4	2.67653	4.19915	375.911	9.66308e-84	3.46954e-82
Acinar	ENSG00000140548	ZNF710	-1.54118	3.40254	375.078	1.4674e-83	5.25738e-82
Acinar	ENSG00000073464	CLCN4	3.20783	2.91306	374.877	1.62279e-83	5.80166e-82
Acinar	ENSG00000007264	MATK	-3.21898	3.13684	373.845	2.7226e-83	9.71273e-82
Acinar	ENSG00000137821	LRRC49	2.86446	2.99748	372.679	4.88646e-83	1.7395e-81
Acinar	ENSG00000118402	ELOVL4	3.1354	2.2808	372.465	5.43807e-83	1.93173e-81
Acinar	ENSG00000163596	ICA1L	1.92606	4.11583	372.006	6.84747e-83	2.42721e-81
Acinar	ENSG00000178467	P4HTM	1.31464	5.62686	371.719	7.90437e-83	2.7959e-81
Acinar	ENSG00000138735	PDE5A	1.60015	4.84608	371.328	9.61729e-83	3.39458e-81
Acinar	ENSG00000106070	GRB10	-1.75564	4.15679	371.282	9.84306e-83	3.46692e-81
Acinar	ENSG00000102524	TNFSF13B	-3.89649	3.48084	370.683	1.32913e-82	4.67157e-81
Acinar	ENSG00000134874	DZIP1	2.30585	3.31605	370.372	1.55279e-82	5.4462e-81
Acinar	ENSG00000183971	NPW	-2.51659	6.07643	369.649	2.23216e-82	7.81257e-81
Acinar	ENSG00000170965	PLAC1	-5.44268	1.0451	369.359	2.58097e-82	9.01444e-81
Acinar	ENSG00000131831	RAI2	3.85376	1.83118	368.854	3.3244e-82	1.15867e-80
Acinar	ENSG00000105255	FSD1	4.90223	1.61636	368.58	3.81365e-82	1.32642e-80
Acinar	ENSG00000171130	ATP6V0E2	2.89164	4.9481	368.336	4.30917e-82	1.49564e-80
Acinar	ENSG00000242265	PEG10	1.4216	6.69842	366.91	8.81153e-82	3.05198e-80
Acinar	ENSG00000167476	JSRP1	4.27017	2.65346	366.706	9.75811e-82	3.37282e-80
Acinar	ENSG00000155093	PTPRN2	2.83962	5.23225	366.585	1.03712e-81	3.57732e-80
Acinar	ENSG00000077080	ACTL6B	4.27043	2.34044	366.046	1.35885e-81	4.67737e-80
Acinar	ENSG00000196361	ELAVL3	4.25998	1.48011	365.445	1.83645e-81	6.30829e-80
Acinar	ENSG00000102078	SLC25A14	2.06224	3.7543	365.44	1.84074e-81	6.31002e-80
Acinar	ENSG00000162438	CTRC	-6.74757	13.7828	365.034	2.25717e-81	7.72164e-80
Acinar	ENSG00000134470	IL15RA	-4.14218	1.62493	365.02	2.27233e-81	7.75758e-80
Acinar	ENSG00000205356	TECPR1	1.96806	3.38627	364.961	2.34032e-81	7.97336e-80
Acinar	ENSG00000167771	RCOR2	2.84	2.83486	364.779	2.56433e-81	8.71871e-80
Acinar	ENSG00000065609	SNAP91	4.98787	1.4095	364.362	3.16148e-81	1.07272e-79
Acinar	ENSG00000251573	CTD-2089N3.2	5.80121	1.4549	364.249	3.34518e-81	1.13274e-79
Acinar	ENSG00000107249	GLIS3	1.69977	5.05899	363.934	3.9164e-81	1.32347e-79
Acinar	ENSG00000187720	THSD4	4.09808	1.78062	363.285	5.42257e-81	1.82875e-79
Acinar	ENSG00000039139	DNAH5	5.2699	1.89717	363.206	5.64246e-81	1.89906e-79
Acinar	ENSG00000258867	LINC01146	4.97143	1.4331	362.989	6.29167e-81	2.11329e-79
Acinar	ENSG00000160190	SLC37A1	2.01327	3.00505	362.275	8.99996e-81	3.01689e-79
Acinar	ENSG00000139767	SRRM4	5.72354	1.81673	362.052	1.00637e-80	3.36671e-79
Acinar	ENSG00000117280	RAB29	2.04034	4.13929	361.806	1.13836e-80	3.80061e-79
Acinar	ENSG00000166707	ZCCHC18	3.32246	1.74972	361.654	1.22884e-80	4.09449e-79
Acinar	ENSG00000112818	MEP1A	-6.12947	1.29239	361.605	1.25918e-80	4.18722e-79
Acinar	ENSG00000182809	CRIP2	2.91125	5.6147	361.351	1.42989e-80	4.74541e-79
Acinar	ENSG00000266094	RASSF5	2.40208	2.61641	360.55	2.13739e-80	7.07929e-79
Acinar	ENSG00000188042	ARL4C	1.53147	4.1748	360.468	2.22653e-80	7.35993e-79
Acinar	ENSG00000129355	CDKN2D	2.6164	3.35042	359.821	3.07972e-80	1.016e-78
Acinar	ENSG00000138670	RASGEF1B	2.84213	3.04974	359.405	3.79511e-80	1.24954e-78
Acinar	ENSG00000145692	BHMT	3.93144	1.87835	358.99	4.67171e-80	1.53512e-78
Acinar	ENSG00000095739	BAMBI	3.18396	3.40347	358.905	4.87456e-80	1.59863e-78
Acinar	ENSG00000073849	ST6GAL1	3.00723	2.54928	358.887	4.92087e-80	1.61064e-78
Acinar	ENSG00000178965	ERICH3	5.78634	1.69631	358.496	5.9843e-80	1.95487e-78
Acinar	ENSG00000157017	GHRL	6.06932	9.35571	358.251	6.76824e-80	2.20663e-78
Acinar	ENSG00000178662	CSRNP3	1.78282	4.58141	358.05	7.48544e-80	2.43569e-78
Acinar	ENSG00000118308	LRMP	-3.2943	3.6354	357.953	7.85915e-80	2.55231e-78
Acinar	ENSG00000215218	UBE2QL1	4.8353	2.66085	357.592	9.41889e-80	3.05289e-78
Acinar	ENSG00000099960	SLC7A4	4.27611	1.19654	357.282	1.10001e-79	3.55849e-78
Acinar	ENSG00000235984	GPC5-AS1	5.41335	1.77586	356.981	1.27912e-79	4.12988e-78
Acinar	ENSG00000125378	BMP4	-3.4155	3.23751	355.653	2.48978e-79	8.02317e-78
Acinar	ENSG00000146966	DENND2A	3.56163	3.03101	354.281	4.95391e-79	1.59329e-77
Acinar	ENSG00000267586	LINC00907	5.35151	1.98684	354.026	5.62796e-79	1.80659e-77
Acinar	ENSG00000141098	GFOD2	1.42227	4.05662	353.755	6.44796e-79	2.06583e-77
Acinar	ENSG00000168952	STXBP6	-2.95578	4.62159	352.926	9.77e-79	3.12415e-77
Acinar	ENSG00000128564	VGF	5.88174	1.63429	351.758	1.75556e-78	5.603e-77
Acinar	ENSG00000158014	SLC30A2	-5.03911	3.1209	351.182	2.34325e-78	7.46436e-77
Acinar	ENSG00000095203	EPB41L4B	-1.9084	4.15715	351.097	2.4444e-78	7.77171e-77
Acinar	ENSG00000151715	TMEM45B	4.00295	1.75149	350.63	3.0905e-78	9.80718e-77
Acinar	ENSG00000142185	TRPM2	5.57526	1.42284	350.6	3.13754e-78	9.93754e-77
Acinar	ENSG00000121900	TMEM54	2.2689	3.60085	350.15	3.92998e-78	1.24238e-76
Acinar	ENSG00000118762	PKD2	1.63904	4.1926	349.835	4.6041e-78	1.45273e-76
Acinar	ENSG00000103647	CORO2B	4.08767	1.55179	348.418	9.36996e-78	2.95092e-76
Acinar	ENSG00000079277	MKNK1	-2.18092	5.81893	347.419	1.54613e-77	4.86011e-76
Acinar	ENSG00000177432	NAP1L5	2.47971	3.81282	346.313	2.69127e-77	8.44378e-76
Acinar	ENSG00000138613	APH1B	1.69395	3.61676	345.575	3.89797e-77	1.22068e-75
Acinar	ENSG00000170873	MTSS1	1.75544	4.43155	345.528	3.99014e-77	1.2472e-75
Acinar	ENSG00000166924	NYAP1	5.4038	1.33919	344.031	8.4529e-77	2.63718e-75
Acinar	ENSG00000125144	MT1G	-6.22765	12.48	343.812	9.43516e-77	2.93813e-75
Acinar	ENSG00000092068	SLC7A8	2.20317	5.27441	343.399	1.16074e-76	3.60781e-75
Acinar	ENSG00000164061	BSN	3.73314	1.77204	342.904	1.48741e-76	4.61457e-75
Acinar	ENSG00000139874	SSTR1	1.97777	3.51525	342.149	2.17249e-76	6.72745e-75
Acinar	ENSG00000150787	PTS	1.5514	5.68347	341.061	3.74875e-76	1.1587e-74
Acinar	ENSG00000076344	RGS11	3.94462	2.18239	340.352	5.3492e-76	1.65033e-74
Acinar	ENSG00000105419	MEIS3	4.48321	2.03346	339.96	6.51107e-76	2.00507e-74
Acinar	ENSG00000163462	TRIM46	4.07125	2.03832	339.907	6.68666e-76	2.05534e-74
Acinar	ENSG00000100167	SEPT3	5.3912	2.38092	339.402	8.61179e-76	2.64222e-74
Acinar	ENSG00000234409	CCDC188	6.02684	1.07723	338.988	1.05969e-75	3.2453e-74
Acinar	ENSG00000005486	RHBDD2	1.7714	5.39606	338.575	1.30371e-75	3.98529e-74
Acinar	ENSG00000178171	AMER3	3.92718	1.99616	338.506	1.34959e-75	4.11799e-74
Acinar	ENSG00000167733	HSD11B1L	1.92503	4.35076	337.586	2.14057e-75	6.51954e-74
Acinar	ENSG00000253457	SMIM18	6.29457	1.17348	337.386	2.36621e-75	7.19363e-74
Acinar	ENSG00000116183	PAPPA2	5.67732	1.67375	337.284	2.49095e-75	7.55906e-74
Acinar	ENSG00000182566	CLEC4G	5.23636	1.42149	337.173	2.63296e-75	7.97547e-74
Acinar	ENSG00000138161	CUZD1	-5.24581	5.56849	336.155	4.38874e-75	1.32698e-73
Acinar	ENSG00000204983	PRSS1	-7.2274	14.5474	335.845	5.1257e-75	1.54699e-73
Acinar	ENSG00000166086	JAM3	2.58522	3.43155	334.755	8.85379e-75	2.66734e-73
Acinar	ENSG00000169347	GP2	-6.58631	11.6052	334.156	1.19558e-74	3.59537e-73
Acinar	ENSG00000160360	GPSM1	2.95469	3.06644	333.9	1.35922e-74	4.08012e-73
Acinar	ENSG00000197177	ADGRA1	4.97487	1.24064	332.937	2.20388e-74	6.6037e-73
Acinar	ENSG00000187045	TMPRSS6	2.69951	3.37487	332.451	2.81193e-74	8.41055e-73
Acinar	ENSG00000172824	CES4A	3.05388	2.88569	332.233	3.13718e-74	9.36657e-73
Acinar	ENSG00000168928	CTRB2	-5.64908	13.7402	332.103	3.34705e-74	9.97529e-73
Acinar	ENSG00000243955	GSTA1	-5.44643	6.30617	332.081	3.38437e-74	1.00685e-72
Acinar	ENSG00000144290	SLC4A10	5.43498	1.37798	331.425	4.70451e-74	1.3971e-72
Acinar	ENSG00000130829	DUSP9	5.33698	1.74295	331.293	5.0253e-74	1.48971e-72
Acinar	ENSG00000259120	SMIM6	1.82061	5.0306	330.857	6.25404e-74	1.85066e-72
Acinar	ENSG00000160460	SPTBN4	4.42309	1.87068	330.778	6.50777e-74	1.92233e-72
Acinar	ENSG00000135596	MICAL1	3.46329	2.13093	330.37	7.98388e-74	2.35418e-72
Acinar	ENSG00000140323	DISP2	3.98138	1.18444	329.53	1.21679e-73	3.58157e-72
Acinar	ENSG00000090932	DLL3	5.1577	1.29001	329.261	1.39253e-73	4.09163e-72
Acinar	ENSG00000143502	SUSD4	-2.45526	4.0306	328.91	1.65992e-73	4.8687e-72
Acinar	ENSG00000186094	AGBL4	4.58952	1.31325	328.722	1.82418e-73	5.3411e-72
Acinar	ENSG00000204653	ASPDH	5.54446	2.37004	328.336	2.21366e-73	6.47011e-72
Acinar	ENSG00000184949	FAM227A	2.19668	3.48101	328.023	2.59098e-73	7.55968e-72
Acinar	ENSG00000162630	B3GALT2	4.30531	1.65673	327.438	3.47313e-73	1.01158e-71
Acinar	ENSG00000177103	DSCAML1	3.75064	1.57156	327.37	3.5949e-73	1.04522e-71
Acinar	ENSG00000138771	SHROOM3	2.15099	3.44521	327.126	4.06142e-73	1.1788e-71
Acinar	ENSG00000239521	GATS	2.14302	2.94991	326.803	4.77684e-73	1.38404e-71
Acinar	ENSG00000086619	ERO1B	2.26102	8.02668	326.023	7.06411e-73	2.0432e-71
Acinar	ENSG00000168491	CCDC110	-2.13315	4.92499	325.926	7.4164e-73	2.14137e-71
Acinar	ENSG00000173114	LRRN3	3.37658	3.3292	325.858	7.67227e-73	2.21142e-71
Acinar	ENSG00000170558	CDH2	3.61768	2.32166	325.546	8.97216e-73	2.58163e-71
Acinar	ENSG00000182621	PLCB1	-3.16795	3.87897	325.361	9.84462e-73	2.82778e-71
Acinar	ENSG00000130558	OLFM1	4.20719	2.08864	323.797	2.15673e-72	6.18434e-71
Acinar	ENSG00000137941	TTLL7	1.817	4.96085	323.14	2.99955e-72	8.58633e-71
Acinar	ENSG00000100060	MFNG	2.87472	2.19329	322.96	3.28231e-72	9.37965e-71
Acinar	ENSG00000213760	ATP6V1G2	4.10766	1.53722	322.848	3.47252e-72	9.9062e-71
Acinar	ENSG00000130427	EPO	-5.01744	0.0811734	322.739	3.6667e-72	1.04423e-70
Acinar	ENSG00000219438	FAM19A5	3.39872	1.91997	320.806	9.66714e-72	2.74837e-70
Acinar	ENSG00000150627	WDR17	3.18854	1.83784	320.525	1.11286e-71	3.15846e-70
Acinar	ENSG00000008513	ST3GAL1	2.85178	2.89699	320.377	1.19902e-71	3.39722e-70
Acinar	ENSG00000183145	RIPPLY3	4.8876	1.46007	320.183	1.32144e-71	3.73773e-70
Acinar	ENSG00000111450	STX2	2.24663	3.87786	320.178	1.32473e-71	3.74068e-70
Acinar	ENSG00000092096	SLC22A17	1.46299	4.55349	320.163	1.33503e-71	3.76339e-70
Acinar	ENSG00000188107	EYS	3.89173	1.9067	319.425	1.93262e-71	5.43875e-70
Acinar	ENSG00000050165	DKK3	3.29625	2.7237	319.001	2.3909e-71	6.7171e-70
Acinar	ENSG00000132639	SNAP25	3.55914	4.64081	318.992	2.40167e-71	6.73599e-70
Acinar	ENSG00000182901	RGS7	3.70371	2.37045	318.469	3.12122e-71	8.73943e-70
Acinar	ENSG00000148948	LRRC4C	4.08359	1.42795	318.295	3.40666e-71	9.52265e-70
Acinar	ENSG00000146122	DAAM2	-2.94028	2.35066	318.248	3.48813e-71	9.73404e-70
Acinar	ENSG00000127824	TUBA4A	1.8236	5.493	317.742	4.49556e-71	1.25244e-69
Acinar	ENSG00000156103	MMP16	4.43391	1.84189	317.338	5.50477e-71	1.53104e-69
Acinar	ENSG00000249242	TMEM150C	3.51893	1.89882	316.833	7.09076e-71	1.96887e-69
Acinar	ENSG00000219159	AC011298.2	-4.38648	4.99962	316.272	9.39395e-71	2.60405e-69
Acinar	ENSG00000167748	KLK1	-6.56502	9.37482	316.195	9.76784e-71	2.70319e-69
Acinar	ENSG00000105855	ITGB8	1.81988	3.70595	315.473	1.40281e-70	3.87576e-69
Acinar	ENSG00000182871	COL18A1	1.96884	5.24911	314.966	1.80912e-70	4.99004e-69
Acinar	ENSG00000163531	NFASC	4.63682	2.22723	314.799	1.96741e-70	5.4177e-69
Acinar	ENSG00000086289	EPDR1	2.19772	2.64072	314.352	2.46132e-70	6.7666e-69
Acinar	ENSG00000147724	FAM135B	5.33848	1.35041	312.178	7.32412e-70	2.01021e-68
Acinar	ENSG00000095932	SMIM24	4.23887	5.07066	312.053	7.79917e-70	2.13707e-68
Acinar	ENSG00000108828	VAT1	1.4877	4.49768	310.857	1.42097e-69	3.88725e-68
Acinar	ENSG00000112773	FAM46A	2.29428	4.96764	310.508	1.69246e-69	4.62235e-68
Acinar	ENSG00000156564	LRFN2	3.84826	1.72317	310.31	1.86907e-69	5.09636e-68
Acinar	ENSG00000132821	VSTM2L	3.60649	2.79128	310.089	2.08813e-69	5.68436e-68
Acinar	ENSG00000174576	NPAS4	5.25316	2.65304	310.04	2.14088e-69	5.81843e-68
Acinar	ENSG00000149654	CDH22	4.67342	1.92436	309.354	3.01971e-69	8.19353e-68
Acinar	ENSG00000127863	TNFRSF19	2.46185	2.84885	308.977	3.64804e-69	9.88232e-68
Acinar	ENSG00000140416	TPM1	1.45729	6.85834	308.514	4.60232e-69	1.24472e-67
Acinar	ENSG00000144191	CNGA3	5.74221	1.25838	308.493	4.65017e-69	1.25562e-67
Acinar	ENSG00000169297	NR0B1	6.16392	1.56163	307.526	7.55585e-69	2.0369e-67
Acinar	ENSG00000080293	SCTR	2.11878	4.63727	307.299	8.46355e-69	2.27791e-67
Acinar	ENSG00000130005	GAMT	-1.76024	6.41555	307.171	9.02731e-69	2.42572e-67
Acinar	ENSG00000067955	CBFB	1.66444	3.68433	306.772	1.10284e-68	2.95866e-67
Acinar	ENSG00000127324	TSPAN8	2.46454	3.71238	306.592	1.20662e-68	3.23188e-67
Acinar	ENSG00000151778	SERP2	2.12897	3.00821	306.542	1.23754e-68	3.30938e-67
Acinar	ENSG00000184702	SEPT5	4.70484	1.60366	306.462	1.28808e-68	3.43901e-67
Acinar	ENSG00000236716	RP11-478H13.1	-4.94124	1.82204	306.008	1.6179e-68	4.31267e-67
Acinar	ENSG00000130511	SSBP4	1.85309	5.83388	306.001	1.62326e-68	4.32004e-67
Acinar	ENSG00000118898	PPL	2.12149	4.39729	305.684	1.90326e-68	5.05715e-67
Acinar	ENSG00000089250	NOS1	-3.78153	1.91051	305.006	2.67407e-68	7.09394e-67
Acinar	ENSG00000259834	RP11-284N8.3	5.01851	1.165	304.94	2.76438e-68	7.32187e-67
Acinar	ENSG00000130208	APOC1	-2.89478	5.18746	304.732	3.06785e-68	8.11275e-67
Acinar	ENSG00000186815	TPCN1	-1.6821	3.4152	304.491	3.46145e-68	9.1391e-67
Acinar	ENSG00000173064	HECTD4	1.89471	5.21945	304.122	4.16572e-68	1.09812e-66
Acinar	ENSG00000227036	LINC00511	2.65796	3.51202	303.057	7.10873e-68	1.87096e-66
Acinar	ENSG00000153707	PTPRD	2.48578	3.15359	302.862	7.8371e-68	2.0594e-66
Acinar	ENSG00000187231	SESTD1	1.32964	4.49176	302.695	8.5245e-68	2.23651e-66
Acinar	ENSG00000066032	CTNNA2	4.10055	1.63524	302.069	1.16665e-67	3.05604e-66
Acinar	ENSG00000163590	PPM1L	1.81747	3.45592	302.024	1.19329e-67	3.12091e-66
Acinar	ENSG00000134193	REG4	-3.84225	6.09531	300.411	2.68018e-67	6.9987e-66
Acinar	ENSG00000107099	DOCK8	3.17094	2.06713	300.101	3.13213e-67	8.16609e-66
Acinar	ENSG00000197535	MYO5A	1.95384	3.28667	300.008	3.28154e-67	8.54226e-66
Acinar	ENSG00000186472	PCLO	2.53422	5.45252	299.104	5.16495e-67	1.3424e-65
Acinar	ENSG00000256151	RP11-76C10.5	7.83005	0.784167	298.888	5.75356e-67	1.49306e-65
Acinar	ENSG00000155016	CYP2U1	2.7437	2.5486	298.818	5.95977e-67	1.54417e-65
Acinar	ENSG00000204580	DDR1	1.35946	5.24685	298.547	6.82816e-67	1.76642e-65
Acinar	ENSG00000175161	CADM2	2.57102	2.94943	298.371	7.45988e-67	1.92685e-65
Acinar	ENSG00000138131	LOXL4	3.52287	1.93058	297.572	1.11376e-66	2.87232e-65
Acinar	ENSG00000235162	C12orf75	2.38352	6.08863	297.289	1.28346e-66	3.30486e-65
Acinar	ENSG00000101224	CDC25B	1.87175	2.70004	297.281	1.28867e-66	3.31316e-65
Acinar	ENSG00000272841	RP3-428L16.2	2.53731	1.90106	297.257	1.30456e-66	3.34883e-65
Acinar	ENSG00000124749	COL21A1	-3.74581	4.96924	296.744	1.68743e-66	4.32502e-65
Acinar	ENSG00000147255	IGSF1	2.38676	3.75546	296.68	1.74184e-66	4.45762e-65
Acinar	ENSG00000168925	CTRB1	-6.24051	12.9075	296.124	2.30276e-66	5.88404e-65
Acinar	ENSG00000147003	TMEM27	3.21961	2.51289	295.834	2.6631e-66	6.79438e-65
Acinar	ENSG00000197119	SLC25A29	2.00899	3.45411	295.799	2.70993e-66	6.90329e-65
Acinar	ENSG00000099889	ARVCF	1.84449	3.06924	295.366	3.36866e-66	8.56823e-65
Acinar	ENSG00000215217	C5orf49	2.60457	3.26169	295.27	3.53433e-66	8.97589e-65
Acinar	ENSG00000143353	LYPLAL1	-1.25002	5.6439	294.951	4.14843e-66	1.05195e-64
Acinar	ENSG00000106066	CPVL	-4.04307	4.24654	294.511	5.17124e-66	1.30932e-64
Acinar	ENSG00000004809	SLC22A16	5.58187	0.699265	294.484	5.24318e-66	1.32551e-64
Acinar	ENSG00000176349	AC110781.3	4.84449	0.747678	293.855	7.187e-66	1.81417e-64
Acinar	ENSG00000164049	FBXW12	-4.82682	1.5089	293.699	7.77272e-66	1.95905e-64
Acinar	ENSG00000063854	HAGH	1.21389	4.90077	293.655	7.94631e-66	1.99978e-64
Acinar	ENSG00000243491	RP11-521D12.5	4.87873	1.24524	293.571	8.29071e-66	2.08331e-64
Acinar	ENSG00000065675	PRKCQ	-1.33231	2.95537	293.21	9.93585e-66	2.49294e-64
Acinar	ENSG00000113532	ST8SIA4	4.23872	1.85284	292.663	1.30692e-65	3.27417e-64
Acinar	ENSG00000166848	TERF2IP	1.38667	6.77075	292.405	1.48779e-65	3.7217e-64
Acinar	ENSG00000104967	NOVA2	4.50313	1.73124	291.942	1.87687e-65	4.68795e-64
Acinar	ENSG00000144583	MARCH4	5.76381	1.63232	291.697	2.12198e-65	5.29224e-64
Acinar	ENSG00000173442	EHBP1L1	3.24013	2.90277	291.333	2.54739e-65	6.34371e-64
Acinar	ENSG00000067840	PDZD4	4.04871	1.32125	291.209	2.71151e-65	6.74234e-64
Acinar	ENSG00000176978	DPP7	1.3276	5.64715	290.577	3.72158e-65	9.24016e-64
Acinar	ENSG00000198189	HSD17B11	-1.22754	5.12327	290.501	3.86775e-65	9.5888e-64
Acinar	ENSG00000100219	XBP1	-1.99888	8.06948	290.407	4.05348e-65	1.00343e-63
Acinar	ENSG00000113231	PDE8B	2.40221	4.38323	290.166	4.57409e-65	1.13063e-63
Acinar	ENSG00000124570	SERPINB6	-1.94608	7.13111	289.853	5.35333e-65	1.32128e-63
Acinar	ENSG00000138434	SSFA2	-1.73711	5.72847	289.154	7.60178e-65	1.87346e-63
Acinar	ENSG00000145920	CPLX2	5.58444	1.94221	288.23	1.20866e-64	2.97434e-63
Acinar	ENSG00000134769	DTNA	-1.88371	4.81236	287.894	1.4302e-64	3.51433e-63
Acinar	ENSG00000214870	AC004540.5	4.70035	0.871575	286.778	2.50341e-64	6.14238e-63
Acinar	ENSG00000198794	SCAMP5	1.9357	3.24444	286.774	2.50884e-64	6.14667e-63
Acinar	ENSG00000180815	MAP3K15	4.17028	1.40657	286.755	2.53323e-64	6.19729e-63
Acinar	ENSG00000137691	C11orf70	3.84086	1.5495	286.648	2.67199e-64	6.52717e-63
Acinar	ENSG00000159871	LYPD5	-4.27777	1.02713	284.825	6.67116e-64	1.62726e-62
Acinar	ENSG00000105254	TBCB	1.83316	6.5376	284.658	7.25443e-64	1.76694e-62
Acinar	ENSG00000110427	KIAA1549L	3.125	1.75565	284.604	7.4548e-64	1.8131e-62
Acinar	ENSG00000152779	SLC16A12	-2.88377	5.52746	284.592	7.49875e-64	1.82113e-62
Acinar	ENSG00000099326	MZF1	1.37326	4.1782	284.381	8.33392e-64	2.02101e-62
Acinar	ENSG00000130540	SULT4A1	3.9775	0.893235	284.369	8.3867e-64	2.03085e-62
Acinar	ENSG00000226508	AC104655.3	5.2054	1.00677	284.338	8.51621e-64	2.05922e-62
Acinar	ENSG00000108179	PPIF	-2.34899	5.82731	283.929	1.04591e-63	2.52533e-62
Acinar	ENSG00000023909	GCLM	1.91756	4.60543	283.42	1.34978e-63	3.25432e-62
Acinar	ENSG00000182687	GALR2	-3.0207	1.69742	283.299	1.43484e-63	3.4544e-62
Acinar	ENSG00000173727	CMB9-22P13.1	2.06123	2.61077	283.284	1.4452e-63	3.47432e-62
Acinar	ENSG00000163082	SGPP2	4.44515	1.63687	282.947	1.71181e-63	4.10934e-62
Acinar	ENSG00000054793	ATP9A	1.61071	4.51382	282.885	1.76553e-63	4.2322e-62
Acinar	ENSG00000063015	SEZ6	4.42319	1.08237	282.316	2.34885e-63	5.61819e-62
Acinar	ENSG00000141433	ADCYAP1	5.07426	1.4409	282.315	2.35047e-63	5.61819e-62
Acinar	ENSG00000176171	BNIP3	-1.56003	7.34317	281.916	2.87057e-63	6.85154e-62
Acinar	ENSG00000165533	TTC8	1.2959	4.02761	281.902	2.89193e-63	6.89263e-62
Acinar	ENSG00000173542	MOB1B	2.29045	5.06082	281.704	3.19336e-63	7.6002e-62
Acinar	ENSG00000109906	ZBTB16	-2.09172	2.83252	281.617	3.33661e-63	7.92981e-62
Acinar	ENSG00000118946	PCDH17	2.42656	5.26345	281.251	4.00839e-63	9.51278e-62
Acinar	ENSG00000152402	GUCY1A2	1.83192	5.3622	281.075	4.37797e-63	1.03751e-61
Acinar	ENSG00000013375	PGM3	-1.32327	5.38469	280.771	5.1014e-63	1.20723e-61
Acinar	ENSG00000242110	AMACR	2.21588	2.65893	280.481	5.90019e-63	1.39429e-61
Acinar	ENSG00000149212	SESN3	1.65883	5.45042	280.452	5.98508e-63	1.41234e-61
Acinar	ENSG00000267443	AC010641.1	7.18507	0.708543	280.136	7.01416e-63	1.65284e-61
Acinar	ENSG00000116991	SIPA1L2	2.05619	3.05847	279.854	8.0804e-63	1.9014e-61
Acinar	ENSG00000237289	CKMT1B	2.47994	2.29831	279.837	8.14794e-63	1.91459e-61
Acinar	ENSG00000176058	TPRN	-2.33057	4.87383	279.57	9.31849e-63	2.18656e-61
Acinar	ENSG00000164161	HHIP	-4.92667	4.93715	279.24	1.09979e-62	2.57701e-61
Acinar	ENSG00000257815	LINC01481	1.52503	3.78939	278.652	1.47684e-62	3.45564e-61
Acinar	ENSG00000146433	TMEM181	-1.58348	5.78801	278.431	1.65028e-62	3.85605e-61
Acinar	ENSG00000123240	OPTN	1.76947	4.07416	278.158	1.89266e-62	4.41622e-61
Acinar	ENSG00000171126	KCNG3	5.43069	0.853573	277.681	2.40402e-62	5.60155e-61
Acinar	ENSG00000174516	PELI3	2.10054	2.3664	277.397	2.77223e-62	6.45046e-61
Acinar	ENSG00000151136	BTBD11	4.73421	0.776883	277.367	2.81391e-62	6.53832e-61
Acinar	ENSG00000101096	NFATC2	-2.27132	2.18506	277.36	2.8244e-62	6.55355e-61
Acinar	ENSG00000178860	MSC	-3.73179	0.378481	277.31	2.89601e-62	6.71037e-61
Acinar	ENSG00000104714	ERICH1	-1.21825	5.37169	276.866	3.61853e-62	8.37288e-61
Acinar	ENSG00000162878	PKDCC	2.24081	2.95215	276.612	4.11132e-62	9.49994e-61
Acinar	ENSG00000114541	FRMD4B	2.13153	4.68244	276.591	4.15456e-62	9.58656e-61
Acinar	ENSG00000173068	BNC2	-3.52081	0.654588	276.586	4.16567e-62	9.59891e-61
Acinar	ENSG00000091972	CD200	4.19502	4.29354	276.124	5.25185e-62	1.20851e-60
Acinar	ENSG00000184809	B3GALT5-AS1	4.03977	1.32355	275.883	5.92518e-62	1.36157e-60
Acinar	ENSG00000163171	CDC42EP3	2.50943	5.20144	275.588	6.87319e-62	1.57724e-60
Acinar	ENSG00000203877	RIPPLY2	5.96435	1.29981	275.488	7.22516e-62	1.65573e-60
Acinar	ENSG00000151150	ANK3	1.51747	4.39141	275.15	8.56296e-62	1.9596e-60
Acinar	ENSG00000162174	ASRGL1	1.72729	3.67032	275.047	9.01453e-62	2.06011e-60
Acinar	ENSG00000168792	ABHD15	1.97998	2.83106	274.943	9.49687e-62	2.16737e-60
Acinar	ENSG00000187391	MAGI2	2.23545	3.68234	274.594	1.13149e-61	2.57875e-60
Acinar	ENSG00000272732	RP5-1159O4.2	-2.66247	2.30971	274.414	1.23831e-61	2.81834e-60
Acinar	ENSG00000149527	PLCH2	4.43156	1.10167	274.117	1.43739e-61	3.26697e-60
Acinar	ENSG00000069702	TGFBR3	-2.43375	2.94402	273.683	1.78761e-61	4.05744e-60
Acinar	ENSG00000126217	MCF2L	1.76132	4.16852	273.397	2.06349e-61	4.67723e-60
Acinar	ENSG00000205002	AARD	5.74796	0.990738	273.341	2.12259e-61	4.80468e-60
Acinar	ENSG00000108576	SLC6A4	4.98266	1.19557	272.569	3.1257e-61	7.06569e-60
Acinar	ENSG00000128656	CHN1	3.29894	2.84744	272.434	3.34455e-61	7.55016e-60
Acinar	ENSG00000260025	RP11-490M8.1	2.61493	2.09497	272.37	3.45488e-61	7.78867e-60
Acinar	ENSG00000125888	BANF2	-3.62731	1.2027	272.35	3.49004e-61	7.85732e-60
Acinar	ENSG00000234690	AC073283.4	1.64448	3.34102	272.327	3.52971e-61	7.93588e-60
Acinar	ENSG00000152377	SPOCK1	-3.48801	5.00332	272.271	3.62978e-61	8.14988e-60
Acinar	ENSG00000006071	ABCC8	2.00914	5.40135	272.165	3.8294e-61	8.58652e-60
Acinar	ENSG00000172478	C2orf54	2.43822	3.71713	271.408	5.59829e-61	1.2536e-59
Acinar	ENSG00000099822	HCN2	5.77701	0.789062	271.307	5.88893e-61	1.31691e-59
Acinar	ENSG00000136193	SCRN1	1.41712	4.69737	271.254	6.04766e-61	1.35059e-59
Acinar	ENSG00000169344	UMOD	-5.48339	0.234054	271.116	6.48002e-61	1.44521e-59
Acinar	ENSG00000167578	RAB4B	1.60131	3.62518	270.706	7.96218e-61	1.7734e-59
Acinar	ENSG00000197442	MAP3K5	-2.8334	2.55537	270.68	8.06633e-61	1.79419e-59
Acinar	ENSG00000136960	ENPP2	2.6591	4.46257	270.613	8.3413e-61	1.85288e-59
Acinar	ENSG00000113763	UNC5A	5.35547	1.25135	270.534	8.67868e-61	1.92526e-59
Acinar	ENSG00000153558	FBXL2	1.40083	3.34399	270.442	9.08981e-61	2.01378e-59
Acinar	ENSG00000136997	MYC	-3.58929	5.35165	270.42	9.19136e-61	2.03357e-59
Acinar	ENSG00000153395	LPCAT1	1.52364	3.37346	270.166	1.04395e-60	2.30666e-59
Acinar	ENSG00000149926	FAM57B	5.09823	1.04485	269.985	1.14336e-60	2.52297e-59
Acinar	ENSG00000078053	AMPH	4.62743	1.43224	269.767	1.27525e-60	2.81027e-59
Acinar	ENSG00000198208	RPS6KL1	3.02154	2.03048	268.961	1.91122e-60	4.20621e-59
Acinar	ENSG00000168209	DDIT4	-1.49171	6.3531	268.805	2.06727e-60	4.54363e-59
Acinar	ENSG00000061918	GUCY1B3	1.81678	2.58315	268.628	2.25925e-60	4.95904e-59
Acinar	ENSG00000133116	KL	4.61756	1.16394	268.059	3.00623e-60	6.58997e-59
Acinar	ENSG00000260230	FRRS1L	4.19649	0.964419	267.868	3.30747e-60	7.24079e-59
Acinar	ENSG00000163040	CCDC74A	2.9875	1.47487	267.411	4.15996e-60	9.09514e-59
Acinar	ENSG00000169902	TPST1	1.65679	3.56872	267.176	4.68083e-60	1.02205e-58
Acinar	ENSG00000164418	GRIK2	3.45456	1.46984	266.945	5.25842e-60	1.14667e-58
Acinar	ENSG00000159212	CLIC6	2.81084	2.05846	266.885	5.41804e-60	1.17993e-58
Acinar	ENSG00000101347	SAMHD1	-1.33665	3.23141	266.711	5.9131e-60	1.28606e-58
Acinar	ENSG00000149646	CNBD2	1.68654	4.09672	266.575	6.32862e-60	1.37464e-58
Acinar	ENSG00000144815	NXPE3	2.13438	2.34321	266.065	8.17466e-60	1.77331e-58
Acinar	ENSG00000168913	ENHO	2.34698	2.25316	265.85	9.10639e-60	1.97285e-58
Acinar	ENSG00000205726	ITSN1	1.38676	3.50134	265.745	9.59911e-60	2.0769e-58
Acinar	ENSG00000022355	GABRA1	2.42394	2.47562	264.935	1.44149e-59	3.1148e-58
Acinar	ENSG00000116678	LEPR	3.91603	3.13528	264.747	1.5843e-59	3.41898e-58
Acinar	ENSG00000102048	ASB9	3.73788	5.66568	264.346	1.93763e-59	4.17607e-58
Acinar	ENSG00000163395	IGFN1	-3.98603	0.565149	263.974	2.33522e-59	5.02646e-58
Acinar	ENSG00000067798	NAV3	3.42517	1.58325	263.799	2.54979e-59	5.48122e-58
Acinar	ENSG00000203497	PDCD4-AS1	-1.64303	1.95136	263.087	3.64534e-59	7.8262e-58
Acinar	ENSG00000187957	DNER	4.55502	1.20887	262.744	4.3298e-59	9.28373e-58
Acinar	ENSG00000137261	KIAA0319	3.94974	1.11162	262.015	6.24176e-59	1.3366e-57
Acinar	ENSG00000156535	CD109	-3.21326	2.72564	260.963	1.05839e-58	2.26352e-57
Acinar	ENSG00000260903	XKR7	5.28474	0.750709	260.656	1.23438e-58	2.6365e-57
Acinar	ENSG00000271601	LIX1L	1.97652	2.57731	260.556	1.29821e-58	2.76929e-57
Acinar	ENSG00000184368	MAP7D2	3.08027	2.10058	259.901	1.80303e-58	3.84125e-57
Acinar	ENSG00000172575	RASGRP1	2.5486	2.99832	259.863	1.83835e-58	3.91148e-57
Acinar	ENSG00000105711	SCN1B	3.83028	1.64221	259.745	1.95028e-58	4.14435e-57
Acinar	ENSG00000165646	SLC18A2	5.45205	0.680281	259.524	2.1793e-58	4.62512e-57
Acinar	ENSG00000117461	PIK3R3	3.007	2.8156	258.804	3.12827e-58	6.63067e-57
Acinar	ENSG00000173540	GMPPB	-1.50181	4.14738	258.525	3.59707e-58	7.61463e-57
Acinar	ENSG00000091428	RAPGEF4	2.02043	2.97459	258.27	4.08961e-58	8.64631e-57
Acinar	ENSG00000166448	TMEM130	4.65625	0.756254	257.624	5.65568e-58	1.19422e-56
Acinar	ENSG00000169903	TM4SF4	-1.68082	7.65238	257.265	6.77097e-58	1.4279e-56
Acinar	ENSG00000196839	ADA	-3.53669	1.77697	257.207	6.97214e-58	1.46661e-56
Acinar	ENSG00000171587	DSCAM	4.57504	0.848053	257.207	6.97117e-58	1.46661e-56
Acinar	ENSG00000197444	OGDHL	1.85553	2.2837	256.47	1.00935e-57	2.12052e-56
Acinar	ENSG00000172915	NBEA	1.84129	5.12445	256.08	1.22724e-57	2.57504e-56
Acinar	ENSG00000131089	ARHGEF9	1.20369	4.13478	255.586	1.57302e-57	3.29642e-56
Acinar	ENSG00000074047	GLI2	-2.79766	0.675273	255.57	1.58547e-57	3.31832e-56
Acinar	ENSG00000175175	PPM1E	5.63311	1.00033	255.334	1.78537e-57	3.73203e-56
Acinar	ENSG00000172020	GAP43	3.60263	2.09976	255.255	1.85744e-57	3.87782e-56
Acinar	ENSG00000166446	CDYL2	2.57722	2.01176	255.212	1.89755e-57	3.95659e-56
Acinar	ENSG00000119547	ONECUT2	3.58715	1.95356	254.905	2.21395e-57	4.61056e-56
Acinar	ENSG00000110697	PITPNM1	2.228	2.89807	254.601	2.57873e-57	5.36351e-56
Acinar	ENSG00000162676	GFI1	-4.33597	1.05956	254.577	2.60966e-57	5.42107e-56
Acinar	ENSG00000168734	PKIG	1.16817	4.95791	254.017	3.45685e-57	7.172e-56
Acinar	ENSG00000161640	SIGLEC11	-3.51768	1.35552	253.887	3.69059e-57	7.64741e-56
Acinar	ENSG00000138769	CDKL2	2.51698	2.42888	253.852	3.75561e-57	7.77247e-56
Acinar	ENSG00000204991	SPIRE2	1.85229	2.57161	253.223	5.15135e-57	1.06478e-55
Acinar	ENSG00000166503	RP11-382A20.3	1.39368	5.13376	253.015	5.71645e-57	1.18012e-55
Acinar	ENSG00000273108	RP11-416N2.4	2.11641	3.9736	252.648	6.87294e-57	1.41712e-55
Acinar	ENSG00000111052	LIN7A	2.14803	2.80452	252.592	7.06929e-57	1.4558e-55
Acinar	ENSG00000159640	ACE	2.60956	2.07038	252.321	8.1004e-57	1.66608e-55
Acinar	ENSG00000117298	ECE1	-2.01234	6.13317	251.805	1.04954e-56	2.15602e-55
Acinar	ENSG00000277200	RP11-74E22.8	4.47445	1.81927	251.698	1.10742e-56	2.27213e-55
Acinar	ENSG00000171848	RRM2	-2.45534	4.30088	251.626	1.14826e-56	2.35301e-55
Acinar	ENSG00000164038	SLC9B2	2.72877	1.59119	251.134	1.46945e-56	3.00749e-55
Acinar	ENSG00000121440	PDZRN3	-2.06405	4.27099	251.108	1.48933e-56	3.04444e-55
Acinar	ENSG00000107551	RASSF4	1.65419	3.95698	251.05	1.53318e-56	3.13023e-55
Acinar	ENSG00000122870	BICC1	1.98722	4.47246	250.924	1.63287e-56	3.3297e-55
Acinar	ENSG00000174405	LIG4	1.3631	2.96034	250.409	2.11516e-56	4.3079e-55
Acinar	ENSG00000160716	CHRNB2	4.65673	0.847789	250.218	2.32818e-56	4.73596e-55
Acinar	ENSG00000236283	AC013463.2	-3.24669	1.72143	250.037	2.54885e-56	5.17851e-55
Acinar	ENSG00000152954	NRSN1	5.07861	0.431298	249.74	2.95937e-56	6.00524e-55
Acinar	ENSG00000176401	EID2B	2.64016	2.51576	249.445	3.43058e-56	6.94453e-55
Acinar	ENSG00000278041	RP5-984P4.6	3.41315	2.56978	249.446	3.43024e-56	6.94453e-55
Acinar	ENSG00000163069	SGCB	2.12361	4.4373	248.919	4.46903e-56	9.03569e-55
Acinar	ENSG00000163623	NKX6-1	1.59927	4.95621	248.693	5.00575e-56	1.01086e-54
Acinar	ENSG00000117600	PLPPR4	4.02241	0.911875	248.455	5.6391e-56	1.13738e-54
Acinar	ENSG00000196220	SRGAP3	2.26637	3.34406	248.232	6.30932e-56	1.27102e-54
Acinar	ENSG00000163931	TKT	-2.04304	8.0917	248.105	6.72215e-56	1.35255e-54
Acinar	ENSG00000131979	GCH1	3.17107	3.71047	247.876	7.54233e-56	1.51574e-54
Acinar	ENSG00000133169	BEX1	1.52538	8.1315	247.754	8.01894e-56	1.60958e-54
Acinar	ENSG00000118160	SLC8A2	-1.64135	2.58189	247.702	8.23024e-56	1.65001e-54
Acinar	ENSG00000103375	AQP8	-5.31869	6.933	247.395	9.6032e-56	1.92295e-54
Acinar	ENSG00000110148	CCKBR	-2.87832	3.11097	247.323	9.95532e-56	1.99106e-54
Acinar	ENSG00000116661	FBXO2	-3.76763	5.94848	247.302	1.00589e-55	2.00937e-54
Acinar	ENSG00000111727	HCFC2	1.32092	3.67196	247.029	1.15374e-55	2.30195e-54
Acinar	ENSG00000144339	TMEFF2	4.11779	0.951229	246.166	1.77912e-55	3.54548e-54
Acinar	ENSG00000044012	GUCA2B	4.01784	0.80149	245.879	2.05499e-55	4.09033e-54
Acinar	ENSG00000113657	DPYSL3	3.38955	2.53908	245.778	2.16268e-55	4.29956e-54
Acinar	ENSG00000172201	ID4	1.33543	6.49131	245.636	2.32159e-55	4.60998e-54
Acinar	ENSG00000137571	SLCO5A1	4.66796	1.26732	245.566	2.40467e-55	4.76926e-54
Acinar	ENSG00000105520	PLPPR2	2.48529	2.87109	245.53	2.44929e-55	4.85199e-54
Acinar	ENSG00000066382	MPPED2	2.86093	1.91874	245.505	2.48038e-55	4.90774e-54
Acinar	ENSG00000176381	PRR18	5.46097	0.595904	245.394	2.62143e-55	5.18067e-54
Acinar	ENSG00000162078	ZG16B	4.97857	0.746865	245.158	2.95101e-55	5.8251e-54
Acinar	ENSG00000168062	BATF2	-3.76696	1.09158	245.101	3.03746e-55	5.98866e-54
Acinar	ENSG00000155849	ELMO1	-2.49937	6.58736	244.901	3.35785e-55	6.6125e-54
Acinar	ENSG00000142484	TM4SF5	-2.92209	0.0540092	244.86	3.42831e-55	6.74329e-54
Acinar	ENSG00000105737	GRIK5	4.27447	0.871197	244.48	4.1483e-55	8.14985e-54
Acinar	ENSG00000112812	PRSS16	-3.32392	3.86145	244.477	4.15547e-55	8.15431e-54
Acinar	ENSG00000138356	AOX1	-2.35044	2.06189	244.294	4.55386e-55	8.92556e-54
Acinar	ENSG00000161682	FAM171A2	2.28879	2.89801	243.712	6.10004e-55	1.1942e-53
Acinar	ENSG00000157214	STEAP2	-1.61418	2.4882	242.495	1.12394e-54	2.19776e-53
Acinar	ENSG00000075945	KIFAP3	1.12098	4.76527	242.36	1.20253e-54	2.34868e-53
Acinar	ENSG00000173698	ADGRG2	4.23914	1.22648	242.282	1.25092e-54	2.44033e-53
Acinar	ENSG00000156298	TSPAN7	1.15433	5.31346	241.929	1.49318e-54	2.90952e-53
Acinar	ENSG00000051825	MPHOSPH9	1.31229	4.03055	241.735	1.64573e-54	3.20303e-53
Acinar	ENSG00000117419	ERI3	-1.43369	6.47415	241.711	1.66601e-54	3.2387e-53
Acinar	ENSG00000243279	PRAF2	1.45862	3.89057	241.656	1.71213e-54	3.32448e-53
Acinar	ENSG00000183496	MEX3B	3.62637	1.15148	241.567	1.7909e-54	3.47339e-53
Acinar	ENSG00000007402	CACNA2D2	2.95643	2.80742	241.232	2.11915e-54	4.10525e-53
Acinar	ENSG00000138794	CASP6	-1.07398	5.21001	240.887	2.51955e-54	4.87522e-53
Acinar	ENSG00000139946	PELI2	-1.84546	4.31231	240.711	2.75247e-54	5.31974e-53
Acinar	ENSG00000105357	MYH14	1.47624	3.78148	239.825	4.29448e-54	8.29039e-53
Acinar	ENSG00000084628	NKAIN1	4.44187	1.33433	239.663	4.65784e-54	8.98143e-53
Acinar	ENSG00000151746	BICD1	1.82249	4.05564	239.611	4.78122e-54	9.20869e-53
Acinar	ENSG00000167881	SRP68	-0.924748	5.11304	239.448	5.18925e-54	9.98302e-53
Acinar	ENSG00000159842	ABR	1.81323	2.96958	239.413	5.28047e-54	1.01468e-52
Acinar	ENSG00000106992	AK1	1.37435	5.55864	239.163	5.98764e-54	1.14924e-52
Acinar	ENSG00000144591	GMPPA	-1.16711	4.43458	239.048	6.34372e-54	1.21618e-52
Acinar	ENSG00000154162	CDH12	5.50303	1.0523	238.968	6.60374e-54	1.26458e-52
Acinar	ENSG00000249684	RP11-423H2.3	3.07212	2.13342	238.776	7.27105e-54	1.39077e-52
Acinar	ENSG00000126262	FFAR2	5.43865	0.643188	238.614	7.88682e-54	1.50682e-52
Acinar	ENSG00000114279	FGF12	1.84031	2.89738	238.53	8.22811e-54	1.57022e-52
Acinar	ENSG00000205022	PABPN1L	5.12696	0.950441	238.506	8.32521e-54	1.58693e-52
Acinar	ENSG00000138347	MYPN	-4.90414	0.384522	238.331	9.09277e-54	1.73126e-52
Acinar	ENSG00000173898	SPTBN2	2.93496	2.47646	238.169	9.85975e-54	1.87515e-52
Acinar	ENSG00000104814	MAP4K1	-4.18042	3.0576	237.668	1.26802e-53	2.40881e-52
Acinar	ENSG00000266028	SRGAP2	2.06259	2.14364	237.551	1.34488e-53	2.55191e-52
Acinar	ENSG00000233705	SLC26A4-AS1	5.62355	0.34142	237.399	1.45138e-53	2.75085e-52
Acinar	ENSG00000166863	TAC3	6.31831	4.32059	237.363	1.47827e-53	2.79863e-52
Acinar	ENSG00000113742	CPEB4	1.4187	4.73058	237.167	1.63072e-53	3.08374e-52
Acinar	ENSG00000165406	MARCH8	1.27381	4.36042	237.026	1.75067e-53	3.30682e-52
Acinar	ENSG00000196776	CD47	-1.20655	5.6311	236.992	1.78066e-53	3.35967e-52
Acinar	ENSG00000112679	DUSP22	-1.88329	4.64527	236.669	2.09404e-53	3.94646e-52
Acinar	ENSG00000121210	KIAA0922	-1.60061	4.03529	236.433	2.35721e-53	4.43741e-52
Acinar	ENSG00000145365	TIFA	-2.26114	4.82905	235.938	3.02257e-53	5.68353e-52
Acinar	ENSG00000260469	C15orf59-AS1	6.54448	0.614789	235.908	3.06927e-53	5.76483e-52
Acinar	ENSG00000162390	ACOT11	2.68658	2.86041	235.848	3.16289e-53	5.93398e-52
Acinar	ENSG00000114204	SERPINI2	-4.7158	9.00254	235.703	3.40154e-53	6.37453e-52
Acinar	ENSG00000132334	PTPRE	3.90822	2.90825	235.696	3.41335e-53	6.38948e-52
Acinar	ENSG00000131899	LLGL1	2.45281	2.69208	235.647	3.49786e-53	6.54033e-52
Acinar	ENSG00000080298	RFX3	1.68355	4.34428	235.279	4.20845e-53	7.86018e-52
Acinar	ENSG00000277013	CTC-526N19.1	-4.41944	1.44639	235.248	4.27363e-53	7.97298e-52
Acinar	ENSG00000154065	ANKRD29	3.46618	0.890353	235.022	4.78901e-53	8.92449e-52
Acinar	ENSG00000171159	C9orf16	1.33569	6.67301	234.689	5.66111e-53	1.05379e-51
Acinar	ENSG00000176903	PNMA1	2.47937	4.2546	234.617	5.86843e-53	1.09116e-51
Acinar	ENSG00000196482	ESRRG	3.20222	2.16588	234.244	7.07851e-53	1.31469e-51
Acinar	ENSG00000175414	ARL10	2.07531	2.38725	233.525	1.01548e-52	1.88395e-51
Acinar	ENSG00000090097	PCBP4	1.62872	4.14233	233.056	1.28504e-52	2.38139e-51
Acinar	ENSG00000120833	SOCS2	2.54832	2.80889	232.613	1.60544e-52	2.97185e-51
Acinar	ENSG00000102780	DGKH	2.09171	2.20861	232.288	1.88983e-52	3.49441e-51
Acinar	ENSG00000198752	CDC42BPB	1.09719	4.93813	232.254	1.92236e-52	3.55061e-51
Acinar	ENSG00000158427	TMSB15B	1.89262	2.43927	232.091	2.08645e-52	3.84942e-51
Acinar	ENSG00000173557	C2orf70	3.14096	1.61979	231.94	2.25039e-52	4.14729e-51
Acinar	ENSG00000152254	G6PC2	6.3222	1.48864	231.928	2.26459e-52	4.16885e-51
Acinar	ENSG00000113966	ARL6	1.45825	2.502	231.706	2.5305e-52	4.65322e-51
Acinar	ENSG00000189283	FHIT	-1.3384	5.15296	231.628	2.63154e-52	4.83368e-51
Acinar	ENSG00000103512	NOMO1	-2.28371	4.74037	231.435	2.89931e-52	5.31966e-51
Acinar	ENSG00000167880	EVPL	3.41531	1.3121	230.838	3.91372e-52	7.17301e-51
Acinar	ENSG00000162817	C1orf115	-2.00212	3.6693	230.611	4.38701e-52	8.0316e-51
Acinar	ENSG00000148450	MSRB2	1.04735	4.82813	230.474	4.69891e-52	8.59319e-51
Acinar	ENSG00000167747	C19orf48	-2.09308	5.97043	230.174	5.46223e-52	9.97816e-51
Acinar	ENSG00000077327	SPAG6	5.02081	0.718781	229.914	6.22365e-52	1.13566e-50
Acinar	ENSG00000158258	CLSTN2	4.20519	0.799053	229.831	6.48957e-52	1.18289e-50
Acinar	ENSG00000248890	HHIP-AS1	-4.38308	4.82437	229.818	6.5311e-52	1.18916e-50
Acinar	ENSG00000124406	ATP8A1	1.83731	3.69877	229.624	7.19929e-52	1.30939e-50
Acinar	ENSG00000143702	CEP170	1.44658	4.85454	229.542	7.50125e-52	1.36282e-50
Acinar	ENSG00000274070	GATSL2	2.23873	1.67731	229.506	7.63873e-52	1.38629e-50
Acinar	ENSG00000112562	SMOC2	-3.81929	4.81852	229.428	7.94606e-52	1.44049e-50
Acinar	ENSG00000135926	TMBIM1	-1.68943	4.91078	229.418	7.98548e-52	1.44607e-50
Acinar	ENSG00000171227	TMEM37	2.35663	4.94535	229.386	8.11344e-52	1.46764e-50
Acinar	ENSG00000108175	ZMIZ1	1.55815	4.2587	229.318	8.39668e-52	1.51723e-50
Acinar	ENSG00000164465	DCBLD1	1.76213	4.09634	229.298	8.48294e-52	1.53116e-50
Acinar	ENSG00000139970	RTN1	4.84811	4.22503	229.202	8.90068e-52	1.60482e-50
Acinar	ENSG00000204065	TCEAL5	2.14941	3.65737	229.038	9.66414e-52	1.74059e-50
Acinar	ENSG00000166123	GPT2	-1.689	4.41484	228.745	1.11968e-51	2.01445e-50
Acinar	ENSG00000273749	CYFIP1	-1.85382	5.80231	228.523	1.25174e-51	2.24963e-50
Acinar	ENSG00000169715	MT1E	-4.29554	10.5057	228.101	1.54709e-51	2.77743e-50
Acinar	ENSG00000196628	TCF4	2.11302	4.73112	228.089	1.55612e-51	2.79062e-50
Acinar	ENSG00000183960	KCNH8	2.19459	2.69675	228.002	1.62582e-51	2.91249e-50
Acinar	ENSG00000166265	CYYR1	3.63376	3.56147	227.741	1.85353e-51	3.31685e-50
Acinar	ENSG00000180537	RNF182	5.6369	0.52189	227.726	1.86751e-51	3.33828e-50
Acinar	ENSG00000139209	SLC38A4	3.52787	3.02453	227.713	1.87937e-51	3.35587e-50
Acinar	ENSG00000167619	TMEM145	3.29619	0.592356	227.629	1.96074e-51	3.49743e-50
Acinar	ENSG00000197859	ADAMTSL2	4.05568	1.51017	227.132	2.51712e-51	4.48506e-50
Acinar	ENSG00000101294	HM13	-1.27453	6.64471	227.096	2.56249e-51	4.56101e-50
Acinar	ENSG00000165521	EML5	1.89541	2.3522	226.141	4.13924e-51	7.35964e-50
Acinar	ENSG00000176438	SYNE3	4.26269	1.07452	226.132	4.15819e-51	7.38545e-50
Acinar	ENSG00000184305	CCSER1	2.03028	4.23299	225.686	5.20281e-51	9.23097e-50
Acinar	ENSG00000113758	DBN1	1.32543	5.58457	225.436	5.89796e-51	1.04532e-49
Acinar	ENSG00000070961	ATP2B1	0.926691	6.52744	225.411	5.9721e-51	1.05733e-49
Acinar	ENSG00000066735	KIF26A	-2.3275	2.02973	225.265	6.42577e-51	1.13645e-49
Acinar	ENSG00000103226	NOMO3	-1.91822	2.79476	225.219	6.57727e-51	1.16201e-49
Acinar	ENSG00000100079	LGALS2	-4.56585	6.41357	225.172	6.73475e-51	1.18857e-49
Acinar	ENSG00000180440	SERTM1	-4.3656	0.690502	224.668	8.67592e-51	1.52953e-49
Acinar	ENSG00000179331	RAB39A	5.08957	1.27745	224.622	8.87479e-51	1.56294e-49
Acinar	ENSG00000167281	RBFOX3	5.63121	0.732553	224.112	1.14665e-50	2.01723e-49
Acinar	ENSG00000186462	NAP1L2	3.05732	1.49973	224.023	1.19908e-50	2.10725e-49
Acinar	ENSG00000115718	PROC	2.53631	2.14474	223.906	1.27186e-50	2.2328e-49
Acinar	ENSG00000100522	GNPNAT1	-1.41876	4.64895	223.659	1.43945e-50	2.52435e-49
Acinar	ENSG00000111716	LDHB	-3.49486	5.95061	223.54	1.52847e-50	2.67763e-49
Acinar	ENSG00000218336	TENM3	1.62025	3.83348	223.198	1.81523e-50	3.17665e-49
Acinar	ENSG00000111269	CREBL2	1.36758	3.49635	223.071	1.93484e-50	3.38242e-49
Acinar	ENSG00000126259	KIRREL2	-2.46069	5.62874	223.049	1.95613e-50	3.41605e-49
Acinar	ENSG00000149922	TBX6	-2.39448	2.39098	222.84	2.17243e-50	3.7898e-49
Acinar	ENSG00000134278	SPIRE1	1.72659	2.76507	222.789	2.22924e-50	3.88485e-49
Acinar	ENSG00000226051	ZNF503-AS1	-3.01134	1.8462	222.351	2.77683e-50	4.83407e-49
Acinar	ENSG00000196526	AFAP1	2.06519	2.74981	222.21	2.981e-50	5.18409e-49
Acinar	ENSG00000109205	ODAM	-3.73316	1.4649	221.982	3.34314e-50	5.80779e-49
Acinar	ENSG00000188573	FBLL1	3.88893	1.81769	221.972	3.35874e-50	5.82882e-49
Acinar	ENSG00000148408	CACNA1B	4.9439	0.798066	221.865	3.54485e-50	6.14539e-49
Acinar	ENSG00000160097	FNDC5	1.8102	2.95179	221.818	3.6288e-50	6.28439e-49
Acinar	ENSG00000172179	PRL	5.90962	0.640329	221.56	4.13189e-50	7.14822e-49
Acinar	ENSG00000160712	IL6R	3.47549	0.514137	220.867	5.85152e-50	1.01127e-48
Acinar	ENSG00000226137	BAIAP2-AS1	1.68758	3.12293	220.451	7.2123e-50	1.24515e-48
Acinar	ENSG00000213420	GPC2	3.00912	1.93468	220.441	7.24823e-50	1.25006e-48
Acinar	ENSG00000165929	TC2N	-2.83603	5.94053	220.422	7.31533e-50	1.26032e-48
Acinar	ENSG00000229086	LINC01548	6.80427	0.243925	220.319	7.70414e-50	1.32594e-48
Acinar	ENSG00000230082	PRRT3-AS1	-3.17053	1.06422	220.224	8.08013e-50	1.38922e-48
Acinar	ENSG00000169660	HEXDC	-3.30115	7.15377	220.095	8.62327e-50	1.48107e-48
Acinar	ENSG00000051108	HERPUD1	-1.49572	7.56387	219.711	1.04558e-49	1.79396e-48
Acinar	ENSG00000157315	TMED6	-1.85122	5.92528	219.653	1.07641e-49	1.84496e-48
Acinar	ENSG00000137101	CD72	2.80485	2.09842	219.378	1.23624e-49	2.11673e-48
Acinar	ENSG00000162706	CADM3	4.90456	0.641456	219.341	1.25922e-49	2.15386e-48
Acinar	ENSG00000154274	C4orf19	-1.72221	4.18762	219.247	1.31994e-49	2.2554e-48
Acinar	ENSG00000091262	ABCC6	-1.78204	4.32623	219.178	1.36681e-49	2.33311e-48
Acinar	ENSG00000267128	RP11-449J21.5	4.05005	1.30408	219.113	1.41207e-49	2.40789e-48
Acinar	ENSG00000100095	SEZ6L	3.30625	2.90945	219.049	1.45808e-49	2.4838e-48
Acinar	ENSG00000147912	FBXO10	-1.64637	2.32794	218.806	1.64767e-49	2.8039e-48
Acinar	ENSG00000232237	ASCL5	-2.97803	0.0602214	218.758	1.68735e-49	2.86849e-48
Acinar	ENSG00000170837	GPR27	3.16821	2.51525	218.694	1.74323e-49	2.96048e-48
Acinar	ENSG00000211455	STK38L	-1.52187	5.42273	218.679	1.75629e-49	2.97962e-48
Acinar	ENSG00000099958	DERL3	-2.3916	2.33236	218.642	1.78933e-49	3.03258e-48
Acinar	ENSG00000102265	TIMP1	2.58876	6.84435	218.51	1.91144e-49	3.23624e-48
Acinar	ENSG00000174599	TRAM1L1	1.99258	2.31281	218.385	2.03575e-49	3.44321e-48
Acinar	ENSG00000183837	PNMA3	3.14653	2.61634	218.244	2.18438e-49	3.69084e-48
Acinar	ENSG00000167106	FAM102A	1.60547	3.59957	218.187	2.24814e-49	3.79474e-48
Acinar	ENSG00000079689	SCGN	1.98575	7.84534	217.717	2.84727e-49	4.80116e-48
Acinar	ENSG00000114850	SSR3	-1.88696	8.06956	217.385	3.36434e-49	5.66733e-48
Acinar	ENSG00000167912	RP11-25K19.1	2.40014	2.89302	217.204	3.68297e-49	6.1978e-48
Acinar	ENSG00000138750	NUP54	-0.946578	4.65226	217.13	3.82312e-49	6.42716e-48
Acinar	ENSG00000136144	RCBTB1	1.41933	3.10574	217.007	4.0661e-49	6.82875e-48
Acinar	ENSG00000135678	CPM	2.75482	2.28252	216.885	4.32344e-49	7.25363e-48
Acinar	ENSG00000253686	LINC01484	5.17338	1.24993	216.563	5.08397e-49	8.52101e-48
Acinar	ENSG00000028277	POU2F2	3.08659	2.04228	216.506	5.22926e-49	8.75572e-48
Acinar	ENSG00000105552	BCAT2	-1.15517	5.98032	216.349	5.65881e-49	9.46543e-48
Acinar	ENSG00000101349	PAK7	1.92279	3.19342	216.344	5.67461e-49	9.48236e-48
Acinar	ENSG00000066468	FGFR2	1.91212	3.15512	216.142	6.27915e-49	1.0482e-47
Acinar	ENSG00000147419	CCDC25	-1.23725	6.28036	216.011	6.70858e-49	1.11877e-47
Acinar	ENSG00000151208	DLG5	1.26012	3.84601	215.709	7.80602e-49	1.30048e-47
Acinar	ENSG00000260220	CCDC187	4.53709	0.975426	215.357	9.31575e-49	1.55045e-47
Acinar	ENSG00000164054	SHISA5	-0.935543	4.86095	215.242	9.86873e-49	1.64085e-47
Acinar	ENSG00000122711	SPINK4	5.29269	0.589842	214.805	1.22887e-48	2.04117e-47
Acinar	ENSG00000203727	SAMD5	2.63959	4.21115	214.667	1.31724e-48	2.18577e-47
Acinar	ENSG00000185669	SNAI3	-4.50959	1.36817	214.642	1.33384e-48	2.21113e-47
Acinar	ENSG00000258947	TUBB3	4.40734	1.5076	214.173	1.68878e-48	2.79672e-47
Acinar	ENSG00000163618	CADPS	2.90976	6.5024	214.161	1.69876e-48	2.81047e-47
Acinar	ENSG00000259442	RP11-752G15.8	-3.38829	-0.183453	214.024	1.81952e-48	3.00727e-47
Acinar	ENSG00000261514	RP11-527L4.2	6.31554	0.372203	213.732	2.10745e-48	3.4797e-47
Acinar	ENSG00000095321	CRAT	-1.79723	4.25866	213.698	2.14295e-48	3.53481e-47
Acinar	ENSG00000113327	GABRG2	6.5491	0.205233	213.522	2.34143e-48	3.85838e-47
Acinar	ENSG00000096696	DSP	1.21484	7.84649	213.438	2.44286e-48	4.02154e-47
Acinar	ENSG00000161835	GRASP	1.52567	4.47065	213.387	2.5059e-48	4.12126e-47
Acinar	ENSG00000154102	C16orf74	-2.9406	2.39564	213.279	2.64562e-48	4.34674e-47
Acinar	ENSG00000186474	KLK12	4.90128	1.21341	213.252	2.68115e-48	4.40079e-47
Acinar	ENSG00000226816	AC005082.12	2.31232	2.37652	213.199	2.75457e-48	4.51685e-47
Acinar	ENSG00000185483	ROR1	-1.59759	4.16888	213.193	2.76291e-48	4.52607e-47
Acinar	ENSG00000170835	CEL	-4.89166	13.0703	213.124	2.8602e-48	4.68083e-47
Acinar	ENSG00000116329	OPRD1	3.99339	0.850855	213.115	2.87279e-48	4.69684e-47
Acinar	ENSG00000087460	GNAS	1.85192	10.9329	212.793	3.37779e-48	5.51705e-47
Acinar	ENSG00000164116	GUCY1A3	1.63346	3.52149	212.32	4.28302e-48	6.98875e-47
Acinar	ENSG00000188613	NANOS1	2.84455	3.22606	212.158	4.64571e-48	7.57314e-47
Acinar	ENSG00000175894	TSPEAR	3.46632	0.853572	212.15	4.66532e-48	7.59767e-47
Acinar	ENSG00000069535	MAOB	2.81275	1.28679	211.85	5.42276e-48	8.82258e-47
Acinar	ENSG00000101134	DOK5	4.5518	0.76997	211.812	5.529e-48	8.98665e-47
Acinar	ENSG00000197457	STMN3	2.1937	4.01681	211.72	5.78803e-48	9.3985e-47
Acinar	ENSG00000178821	TMEM52	-3.83656	3.88074	211.571	6.2405e-48	1.01233e-46
Acinar	ENSG00000261488	RP11-757F18.5	-3.5052	0.0506945	211.543	6.32892e-48	1.02568e-46
Acinar	ENSG00000105649	RAB3A	1.90584	2.91477	211.507	6.44347e-48	1.04323e-46
Acinar	ENSG00000176428	VPS37D	1.16693	3.47244	211.342	7.00054e-48	1.13232e-46
Acinar	ENSG00000139354	GAS2L3	2.12375	2.20669	211.302	7.14244e-48	1.15415e-46
Acinar	ENSG00000005249	PRKAR2B	1.9699	3.68464	210.876	8.84717e-48	1.42824e-46
Acinar	ENSG00000132329	RAMP1	-3.90303	8.19413	210.466	1.08667e-47	1.75256e-46
Acinar	ENSG00000156642	NPTN	1.12488	4.61778	210.461	1.08961e-47	1.75559e-46
Acinar	ENSG00000168899	VAMP5	-1.68623	5.02681	210.386	1.13176e-47	1.82e-46
Acinar	ENSG00000183379	SYNDIG1L	4.96599	0.298976	210.369	1.14122e-47	1.83343e-46
Acinar	ENSG00000033011	ALG1	-1.54402	3.45895	210.139	1.2812e-47	2.05436e-46
Acinar	ENSG00000132906	CASP9	-1.32378	3.33722	210.14	1.2806e-47	2.05436e-46
Acinar	ENSG00000107140	TESK1	1.33707	3.47332	209.969	1.39512e-47	2.23487e-46
Acinar	ENSG00000070882	OSBPL3	-3.11157	0.779246	209.807	1.51348e-47	2.42214e-46
Acinar	ENSG00000076662	ICAM3	-2.41448	2.37641	209.751	1.55631e-47	2.4883e-46
Acinar	ENSG00000130147	SH3BP4	-2.13512	4.6994	209.718	1.58238e-47	2.52756e-46
Acinar	ENSG00000158163	DZIP1L	1.95223	2.54925	209.683	1.6105e-47	2.57001e-46
Acinar	ENSG00000167703	SLC43A2	2.34306	3.15413	209.621	1.6617e-47	2.64918e-46
Acinar	ENSG00000105467	SYNGR4	4.89445	0.735177	209.588	1.68924e-47	2.69051e-46
Acinar	ENSG00000002933	TMEM176A	2.52653	3.53111	209.532	1.73768e-47	2.76502e-46
Acinar	ENSG00000103257	SLC7A5	3.25032	1.93665	209.452	1.80908e-47	2.87315e-46
Acinar	ENSG00000204682	CASC10	2.75706	2.11601	209.42	1.83836e-47	2.91687e-46
Acinar	ENSG00000226124	FTCDNL1	-2.42281	0.486498	209.281	1.97103e-47	3.1244e-46
Acinar	ENSG00000278195	SSTR3	4.02941	2.75253	209.177	2.07663e-47	3.28866e-46
Acinar	ENSG00000064199	SPA17	1.24417	3.52615	209.15	2.10512e-47	3.33061e-46
Acinar	ENSG00000132840	BHMT2	3.26404	1.79033	209.061	2.2011e-47	3.47916e-46
Acinar	ENSG00000166342	NETO1	3.17309	1.20265	208.996	2.27498e-47	3.59253e-46
Acinar	ENSG00000205809	KLRC2	5.07576	0.599145	208.739	2.58798e-47	4.08294e-46
Acinar	ENSG00000140022	STON2	2.29086	2.54365	208.675	2.67256e-47	4.21238e-46
Acinar	ENSG00000182077	PTCHD3	-5.53692	0.172251	208.368	3.11792e-47	4.90969e-46
Acinar	ENSG00000122786	CALD1	1.38959	6.61623	208.174	3.43737e-47	5.40761e-46
Acinar	ENSG00000132613	MTSS1L	2.05675	2.79072	208.083	3.5976e-47	5.65433e-46
Acinar	ENSG00000131773	KHDRBS3	1.53781	3.10681	208.079	3.60554e-47	5.66148e-46
Acinar	ENSG00000169359	SLC33A1	-1.11245	5.00759	208.056	3.64793e-47	5.72264e-46
Acinar	ENSG00000205090	TMEM240	4.40608	0.217805	207.736	4.28386e-47	6.71393e-46
Acinar	ENSG00000162704	ARPC5	1.03341	6.77854	207.614	4.55475e-47	7.13178e-46
Acinar	ENSG00000107954	NEURL1	1.3857	5.18647	207.509	4.80071e-47	7.50985e-46
Acinar	ENSG00000157992	KRTCAP3	-1.51936	4.40876	207.374	5.13792e-47	8.02334e-46
Acinar	ENSG00000275163	RP11-385J1.3	7.20866	0.11761	207.374	5.1386e-47	8.02334e-46
Acinar	ENSG00000137491	SLCO2B1	-3.40332	2.42031	207.017	6.14743e-47	9.58056e-46
Acinar	ENSG00000092850	TEKT2	2.04758	2.40783	207.017	6.1461e-47	9.58056e-46
Acinar	ENSG00000027075	PRKCH	-1.79018	3.14994	206.999	6.20466e-47	9.66072e-46
Acinar	ENSG00000171291	ZNF439	1.23901	3.07822	206.964	6.3147e-47	9.82287e-46
Acinar	ENSG00000017483	SLC38A5	-4.10276	1.31453	206.802	6.84777e-47	1.06422e-45
Acinar	ENSG00000185742	C11orf87	5.53245	0.381708	206.73	7.10103e-47	1.10255e-45
Acinar	ENSG00000143195	ILDR2	4.77336	1.19597	206.395	8.40096e-47	1.30317e-45
Acinar	ENSG00000249487	LINC01586	6.82709	0.1101	206.353	8.58248e-47	1.33008e-45
Acinar	ENSG00000124701	APOBEC2	2.57555	2.97154	206.23	9.12885e-47	1.41345e-45
Acinar	ENSG00000126251	GPR42	5.16547	0.444577	206.196	9.28785e-47	1.43673e-45
Acinar	ENSG00000178035	IMPDH2	-1.22238	7.07575	205.969	1.041e-46	1.60881e-45
Acinar	ENSG00000250303	RP11-356J5.12	3.88944	1.6743	205.831	1.11569e-46	1.72266e-45
Acinar	ENSG00000148700	ADD3	-1.82203	6.47016	205.685	1.20068e-46	1.85215e-45
Acinar	ENSG00000172247	C1QTNF4	1.89728	4.78603	205.276	1.47446e-46	2.27238e-45
Acinar	ENSG00000255245	FXYD6-FXYD2	3.34058	1.41585	205.226	1.51177e-46	2.32774e-45
Acinar	ENSG00000100626	GALNT16	2.92885	1.64441	205.035	1.66358e-46	2.55912e-45
Acinar	ENSG00000143344	RGL1	2.55765	2.30985	204.638	2.03168e-46	3.12249e-45
Acinar	ENSG00000100116	GCAT	-3.59218	6.03761	204.591	2.0795e-46	3.19303e-45
Acinar	ENSG00000162543	UBXN10	3.51018	1.18091	204.539	2.13518e-46	3.27552e-45
Acinar	ENSG00000102981	PARD6A	-1.60638	4.82261	204.432	2.25301e-46	3.45309e-45
Acinar	ENSG00000109534	GAR1	-1.04746	5.26163	204.221	2.50529e-46	3.83623e-45
Acinar	ENSG00000233912	AC026202.3	-3.6351	0.475798	204.206	2.52333e-46	3.86029e-45
Acinar	ENSG00000168843	FSTL5	4.16967	2.80695	203.8	3.0942e-46	4.72931e-45
Acinar	ENSG00000104427	ZC2HC1A	1.16995	4.46966	203.779	3.12688e-46	4.77488e-45
Acinar	ENSG00000112130	RNF8	1.19188	4.91461	203.451	3.68852e-46	5.62736e-45
Acinar	ENSG00000171451	DSEL	1.80615	3.8871	203.428	3.73058e-46	5.68632e-45
Acinar	ENSG00000108679	LGALS3BP	-1.33278	6.61864	203.326	3.92596e-46	5.97865e-45
Acinar	ENSG00000142634	EFHD2	-1.78499	4.85815	203.224	4.13384e-46	6.28948e-45
Acinar	ENSG00000125170	DOK4	1.59502	2.96328	203.089	4.42315e-46	6.72352e-45
Acinar	ENSG00000272325	NUDT3	0.976991	5.56904	202.903	4.85574e-46	7.37436e-45
Acinar	ENSG00000108405	P2RX1	-4.54335	6.16994	202.765	5.20545e-46	7.89825e-45
Acinar	ENSG00000162998	FRZB	2.5003	4.04565	202.621	5.59554e-46	8.48241e-45
Acinar	ENSG00000277363	SRCIN1	3.5758	1.23119	202.588	5.69046e-46	8.61846e-45
Acinar	ENSG00000124299	PEPD	1.12174	4.98077	202.452	6.09314e-46	9.21996e-45
Acinar	ENSG00000076356	PLXNA2	-1.42011	4.53476	202.073	7.36861e-46	1.11398e-44
Acinar	ENSG00000166126	AMN	2.85852	4.13793	202.046	7.46891e-46	1.12812e-44
Acinar	ENSG00000215704	CELA2B	-6.00581	0.444817	201.876	8.13653e-46	1.22785e-44
Acinar	ENSG00000121410	A1BG	2.92497	3.63864	201.781	8.53278e-46	1.28648e-44
Acinar	ENSG00000082458	DLG3	-1.4428	4.92714	201.775	8.55845e-46	1.28918e-44
Acinar	ENSG00000119125	GDA	5.52115	1.55515	201.761	8.62106e-46	1.29744e-44
Acinar	ENSG00000132554	RGS22	4.37743	0.316049	201.519	9.73399e-46	1.46361e-44
Acinar	ENSG00000188505	NCCRP1	-2.66918	2.2119	201.349	1.06032e-45	1.59286e-44
Acinar	ENSG00000257228	RP11-413B19.2	6.51914	0.404657	201.314	1.0791e-45	1.61963e-44
Acinar	ENSG00000147010	SH3KBP1	1.57922	2.8033	201.269	1.10372e-45	1.65508e-44
Acinar	ENSG00000165175	MID1IP1	-1.93364	6.33322	201.096	1.20426e-45	1.80423e-44
Acinar	ENSG00000136854	STXBP1	1.49778	4.66277	201.079	1.21421e-45	1.81749e-44
Acinar	ENSG00000104205	SGK3	-1.71157	2.68594	200.778	1.41291e-45	2.11303e-44
Acinar	ENSG00000178031	ADAMTSL1	2.55296	1.33446	200.593	1.55066e-45	2.31695e-44
Acinar	ENSG00000104327	CALB1	2.64978	4.44602	200.496	1.62766e-45	2.42983e-44
Acinar	ENSG00000149972	CNTN5	5.54129	0.137361	200.234	1.85704e-45	2.76977e-44
Acinar	ENSG00000198856	OSTC	-1.58027	8.58809	199.881	2.21742e-45	3.30432e-44
Acinar	ENSG00000144278	GALNT13	3.70094	0.999037	199.857	2.24356e-45	3.34028e-44
Acinar	ENSG00000106976	DNM1	1.6892	2.53473	199.795	2.31481e-45	3.44328e-44
Acinar	ENSG00000157423	HYDIN	1.71221	3.63014	199.675	2.45844e-45	3.65366e-44
Acinar	ENSG00000010322	NISCH	1.49176	4.75648	199.522	2.65513e-45	3.94247e-44
Acinar	ENSG00000174775	HRAS	1.2856	4.85934	199.388	2.84098e-45	4.21467e-44
Acinar	ENSG00000121361	KCNJ8	-1.8549	4.11871	199.339	2.91084e-45	4.31064e-44
Acinar	ENSG00000178607	ERN1	-1.23663	4.50258	199.34	2.91022e-45	4.31064e-44
Acinar	ENSG00000172379	ARNT2	1.86085	2.78929	199.258	3.03236e-45	4.4866e-44
Acinar	ENSG00000232396	RP1-76B20.11	4.97654	0.370016	198.738	3.93733e-45	5.8204e-44
Acinar	ENSG00000151023	ENKUR	3.89129	0.887812	198.671	4.07332e-45	6.0161e-44
Acinar	ENSG00000241399	CD302	-1.70394	3.7966	198.653	4.10874e-45	6.06303e-44
Acinar	ENSG00000085788	DDHD2	1.2259	3.60823	198.523	4.38624e-45	6.4668e-44
Acinar	ENSG00000165556	CDX2	3.43537	1.42647	198.463	4.52204e-45	6.66112e-44
Acinar	ENSG00000105926	MPP6	1.66013	4.81326	198.317	4.86568e-45	7.16098e-44
Acinar	ENSG00000057252	SOAT1	1.07916	4.66038	198.263	4.99891e-45	7.35056e-44
Acinar	ENSG00000122375	OPN4	-4.61065	0.334134	198.233	5.07436e-45	7.45493e-44
Acinar	ENSG00000269743	SLC25A53	2.04738	3.27539	197.956	5.83441e-45	8.56399e-44
Acinar	ENSG00000188338	SLC38A3	-2.91845	3.97717	197.623	6.8952e-45	1.01122e-43
Acinar	ENSG00000180739	S1PR5	-4.30192	0.111237	197.612	6.93446e-45	1.01518e-43
Acinar	ENSG00000125912	NCLN	-1.15786	3.70875	197.612	6.93217e-45	1.01518e-43
Acinar	ENSG00000145990	GFOD1	3.42192	1.46597	197.432	7.59154e-45	1.1104e-43
Acinar	ENSG00000105976	MET	-2.28516	3.76721	197.345	7.92981e-45	1.15886e-43
Acinar	ENSG00000090776	EFNB1	1.78885	2.48298	197.34	7.94995e-45	1.16079e-43
Acinar	ENSG00000139144	PIK3C2G	2.30257	2.26153	197.248	8.32676e-45	1.21474e-43
Acinar	ENSG00000164638	SLC29A4	1.91991	4.89738	197.204	8.51131e-45	1.24058e-43
Acinar	ENSG00000116212	LRRC42	0.981301	4.74606	197.117	8.89238e-45	1.29499e-43
Acinar	ENSG00000171943	SRGAP2C	1.82156	2.17536	197.074	9.08666e-45	1.32213e-43
Acinar	ENSG00000112237	CCNC	-1.0713	6.03994	197.05	9.19564e-45	1.33682e-43
Acinar	ENSG00000196632	WNK3	2.1613	4.16605	197.014	9.36256e-45	1.3599e-43
Acinar	ENSG00000176014	TUBB6	-2.51192	2.88141	196.998	9.43924e-45	1.36984e-43
Acinar	ENSG00000250305	KIAA1456	1.80535	2.36662	196.513	1.2044e-44	1.74633e-43
Acinar	ENSG00000170153	RNF150	1.46469	3.20428	196.478	1.22566e-44	1.7756e-43
Acinar	ENSG00000100285	NEFH	-1.84548	1.98726	196.474	1.22833e-44	1.77793e-43
Acinar	ENSG00000100580	TMED8	1.52974	4.36396	196.276	1.35689e-44	1.96231e-43
Acinar	ENSG00000118705	RPN2	-1.79795	7.44128	195.874	1.66033e-44	2.39905e-43
Acinar	ENSG00000021355	SERPINB1	-1.97105	6.60564	195.778	1.7423e-44	2.51531e-43
Acinar	ENSG00000106327	TFR2	-3.52033	4.19536	195.772	1.74791e-44	2.52123e-43
Acinar	ENSG00000185305	ARL15	1.64802	2.55005	195.427	2.07852e-44	2.99551e-43
Acinar	ENSG00000117632	STMN1	1.80223	8.37096	195.185	2.34821e-44	3.38126e-43
Acinar	ENSG00000163874	ZC3H12A	-1.93423	3.51934	194.997	2.58048e-44	3.71251e-43
Acinar	ENSG00000205730	ITPRIPL2	-1.37198	2.58062	194.963	2.6247e-44	3.77287e-43
Acinar	ENSG00000169213	RAB3B	3.23388	5.56345	194.941	2.65429e-44	3.81211e-43
Acinar	ENSG00000083067	TRPM3	3.22809	3.29228	194.387	3.50507e-44	5.02967e-43
Acinar	ENSG00000183077	AFMID	-1.72876	3.13176	194.383	3.5133e-44	5.03714e-43
Acinar	ENSG00000253844	RP11-546K22.1	-1.94926	4.03968	194.381	3.51675e-44	5.03775e-43
Acinar	ENSG00000106538	RARRES2	-4.13895	9.55622	194.298	3.66609e-44	5.24717e-43
Acinar	ENSG00000146530	VWDE	6.0949	0.821792	194.241	3.77368e-44	5.39652e-43
Acinar	ENSG00000169116	PARM1	3.23292	1.90489	194.237	3.78072e-44	5.40196e-43
Acinar	ENSG00000144644	GADL1	4.23359	0.947705	194.218	3.81608e-44	5.4478e-43
Acinar	ENSG00000165181	C9orf84	-4.70556	4.06959	193.883	4.51751e-44	6.44364e-43
Acinar	ENSG00000146425	DYNLT1	1.10945	6.96552	193.849	4.59446e-44	6.54779e-43
Acinar	ENSG00000008118	CAMK1G	5.74567	0.0890934	193.744	4.84369e-44	6.89708e-43
Acinar	ENSG00000142875	PRKACB	1.28397	4.52438	193.728	4.88189e-44	6.94554e-43
Acinar	ENSG00000224568	AC096669.3	6.43226	0.199737	193.713	4.91987e-44	6.9936e-43
Acinar	ENSG00000113319	RASGRF2	3.97459	0.458751	193.649	5.07952e-44	7.21439e-43
Acinar	ENSG00000225129	RP4-614C15.2	5.14545	-0.523379	193.553	5.33084e-44	7.56489e-43
Acinar	ENSG00000184185	KCNJ12	5.3309	0.360477	193.417	5.70936e-44	8.09515e-43
Acinar	ENSG00000169507	SLC38A11	-1.30174	2.79821	193.339	5.93551e-44	8.40863e-43
Acinar	ENSG00000159111	MRPL10	-1.04019	4.87543	193.33	5.96348e-44	8.44109e-43
Acinar	ENSG00000187840	EIF4EBP1	-2.01655	7.0755	193.247	6.2166e-44	8.79189e-43
Acinar	ENSG00000182698	RESP18	6.1733	0.467089	193.234	6.25779e-44	8.84264e-43
Acinar	ENSG00000170946	DNAJC24	1.23866	4.19666	193.144	6.54732e-44	9.24393e-43
Acinar	ENSG00000107562	CXCL12	-3.83556	6.29882	193.127	6.60382e-44	9.3158e-43
Acinar	ENSG00000198682	PAPSS2	2.34942	3.20092	192.838	7.638e-44	1.07656e-42
Acinar	ENSG00000119698	PPP4R4	3.77535	0.588506	192.805	7.76584e-44	1.09365e-42
Acinar	ENSG00000213047	DENND1B	-1.39314	4.36284	192.748	7.98889e-44	1.12411e-42
Acinar	ENSG00000167037	SGSM1	2.22809	1.72411	192.707	8.15437e-44	1.14643e-42
Acinar	ENSG00000197106	SLC6A17	4.99764	0.542022	192.672	8.3027e-44	1.1663e-42
Acinar	ENSG00000130529	TRPM4	-2.21901	3.27191	192.489	9.10108e-44	1.27737e-42
Acinar	ENSG00000233293	RP11-410N8.3	5.6588	0.107204	192.46	9.23322e-44	1.29483e-42
Acinar	ENSG00000102230	PCYT1B	1.82019	2.29901	192.438	9.33488e-44	1.30798e-42
Acinar	ENSG00000174456	C12orf76	1.18622	5.38637	192.391	9.56041e-44	1.33846e-42
Acinar	ENSG00000095380	NANS	-1.27597	5.45927	192.004	1.16103e-43	1.62407e-42
Acinar	ENSG00000212719	C17orf51	3.04821	1.88645	191.992	1.16818e-43	1.63271e-42
Acinar	ENSG00000005108	THSD7A	2.83411	2.04003	191.891	1.22929e-43	1.71667e-42
Acinar	ENSG00000206052	DOK6	2.6797	2.86503	191.848	1.25581e-43	1.75225e-42
Acinar	ENSG00000003096	KLHL13	-2.21913	1.6832	191.71	1.34643e-43	1.87711e-42
Acinar	ENSG00000090971	NAT14	1.37524	4.96329	191.429	1.55001e-43	2.15913e-42
Acinar	ENSG00000109445	ZNF330	-1.24605	5.4485	191.172	1.76424e-43	2.45549e-42
Acinar	ENSG00000184261	KCNK12	4.00917	0.485112	190.893	2.02927e-43	2.822e-42
Acinar	ENSG00000143669	LYST	1.57583	3.72648	190.862	2.06168e-43	2.86469e-42
Acinar	ENSG00000162241	SLC25A45	-2.13032	2.9163	190.652	2.29061e-43	3.18012e-42
Acinar	ENSG00000145569	FAM105A	2.01506	4.62367	190.633	2.31283e-43	3.2083e-42
Acinar	ENSG00000180089	TMEM86B	2.55754	2.06256	190.532	2.43361e-43	3.37304e-42
Acinar	ENSG00000108395	TRIM37	1.21336	3.86697	190.412	2.58418e-43	3.57876e-42
Acinar	ENSG00000137312	FLOT1	0.92172	5.41373	190.378	2.62905e-43	3.63787e-42
Acinar	ENSG00000162434	JAK1	-0.832801	5.86949	189.831	3.46049e-43	4.78437e-42
Acinar	ENSG00000125844	RRBP1	-3.05521	9.01158	189.777	3.55614e-43	4.91254e-42
Acinar	ENSG00000170390	DCLK2	1.69286	2.03978	189.679	3.73564e-43	5.15623e-42
Acinar	ENSG00000152910	CNTNAP4	5.49222	1.8128	189.513	4.06104e-43	5.59611e-42
Acinar	ENSG00000172367	PDZD3	4.31761	0.570237	189.515	4.05775e-43	5.59611e-42
Acinar	ENSG00000072071	ADGRL1	1.58129	3.52493	189.478	4.13343e-43	5.69115e-42
Acinar	ENSG00000109846	CRYAB	-2.1599	3.35735	189.314	4.48861e-43	6.17508e-42
Acinar	ENSG00000167641	PPP1R14A	-3.09503	2.63957	189.172	4.81984e-43	6.62529e-42
Acinar	ENSG00000123689	G0S2	-1.95592	6.9233	188.844	5.68361e-43	7.80618e-42
Acinar	ENSG00000010810	FYN	1.90737	4.15449	188.807	5.79048e-43	7.94641e-42
Acinar	ENSG00000158806	NPM2	2.24594	2.65012	188.732	6.01384e-43	8.24614e-42
Acinar	ENSG00000232480	TGFB2-AS1	-3.47206	0.536661	188.606	6.40597e-43	8.7766e-42
Acinar	ENSG00000148053	NTRK2	1.66899	4.71211	188.569	6.52831e-43	8.93687e-42
Acinar	ENSG00000171766	GATM	-3.6233	9.35889	188.566	6.5355e-43	8.93936e-42
Acinar	ENSG00000166974	MAPRE2	-0.986771	4.98642	188.55	6.59096e-43	9.00783e-42
Acinar	ENSG00000147454	SLC25A37	-1.97103	6.79107	188.466	6.87236e-43	9.38472e-42
Acinar	ENSG00000172318	B3GALT1	2.29693	2.2902	188.341	7.31953e-43	9.98717e-42
Acinar	ENSG00000134910	STT3A	-1.09779	4.79054	188.318	7.40591e-43	1.00968e-41
Acinar	ENSG00000077782	FGFR1	-1.11124	5.54988	188.146	8.07364e-43	1.09981e-41
Acinar	ENSG00000174080	CTSF	1.26884	3.6387	187.961	8.85845e-43	1.20573e-41
Acinar	ENSG00000214274	ANG	-2.71085	3.67892	187.773	9.73892e-43	1.32449e-41
Acinar	ENSG00000116771	AGMAT	-2.34537	1.8468	187.721	9.99338e-43	1.35799e-41
Acinar	ENSG00000135447	PPP1R1A	3.83934	4.42099	187.478	1.12918e-42	1.53318e-41
Acinar	ENSG00000111144	LTA4H	-1.03582	5.85028	187.471	1.13319e-42	1.53738e-41
Acinar	ENSG00000115318	LOXL3	3.09146	1.08774	187.357	1.20005e-42	1.62675e-41
Acinar	ENSG00000101444	AHCY	-1.31394	6.15039	187.312	1.22742e-42	1.6625e-41
Acinar	ENSG00000146192	FGD2	-3.80502	0.0365999	187.134	1.34289e-42	1.81743e-41
Acinar	ENSG00000170703	TTLL6	5.86504	0.167564	187.117	1.35408e-42	1.83109e-41
Acinar	ENSG00000008056	SYN1	2.44047	1.78751	187.029	1.41522e-42	1.91221e-41
Acinar	ENSG00000133731	IMPA1	1.12531	3.78923	186.809	1.58102e-42	2.1345e-41
Acinar	ENSG00000231013	AC013275.2	3.59919	2.25484	186.756	1.62325e-42	2.18974e-41
Acinar	ENSG00000114770	ABCC5	1.75577	3.86294	186.71	1.66168e-42	2.23977e-41
Acinar	ENSG00000111261	MANSC1	-1.37649	4.7406	186.691	1.67781e-42	2.25969e-41
Acinar	ENSG00000164506	STXBP5	-1.07608	4.24304	186.674	1.69188e-42	2.27679e-41
Acinar	ENSG00000261253	AC137932.6	6.30527	-0.470371	186.543	1.80719e-42	2.43001e-41
Acinar	ENSG00000141101	NOB1	-1.20173	5.35567	186.427	1.91579e-42	2.57395e-41
Acinar	ENSG00000162426	SLC45A1	4.27498	0.41276	186.355	1.98601e-42	2.66615e-41
Acinar	ENSG00000198910	L1CAM	3.9291	0.765216	186.353	1.98791e-42	2.66655e-41
Acinar	ENSG00000128590	DNAJB9	-1.42087	6.73928	186.301	2.04082e-42	2.73533e-41
Acinar	ENSG00000148344	PTGES	-3.86495	1.03388	186.29	2.05213e-42	2.74827e-41
Acinar	ENSG00000129128	SPCS3	-1.45984	6.82639	186.128	2.22641e-42	2.97928e-41
Acinar	ENSG00000141741	MIEN1	0.950689	6.11834	186.042	2.32447e-42	3.10801e-41
Acinar	ENSG00000262246	CORO7	1.96816	2.6181	185.96	2.4223e-42	3.23621e-41
Acinar	ENSG00000181123	RP4-539M6.14	6.04688	0.0610231	185.866	2.53904e-42	3.38945e-41
Acinar	ENSG00000135842	FAM129A	-3.78628	4.53903	185.4	3.20968e-42	4.28129e-41
Acinar	ENSG00000198768	APCDD1L	4.69847	0.0533259	185.188	3.57069e-42	4.75902e-41
Acinar	ENSG00000155265	GOLGA7B	2.06354	1.79352	185.162	3.61759e-42	4.81766e-41
Acinar	ENSG00000106565	TMEM176B	2.26765	3.85537	185.16	3.62187e-42	4.81952e-41
Acinar	ENSG00000182916	TCEAL7	3.45348	3.00482	184.841	4.25129e-42	5.65256e-41
Acinar	ENSG00000136059	VILL	-2.35132	3.05376	184.838	4.25735e-42	5.65609e-41
Acinar	ENSG00000244020	MT1HL1	-6.03084	-0.238983	184.751	4.44875e-42	5.90567e-41
Acinar	ENSG00000174996	KLC2	2.09186	2.47466	184.273	5.65492e-42	7.50087e-41
Acinar	ENSG00000087116	ADAMTS2	3.83241	1.67153	184.219	5.81069e-42	7.70136e-41
Acinar	ENSG00000084636	COL16A1	2.46915	2.09309	183.932	6.71234e-42	8.88931e-41
Acinar	ENSG00000166825	ANPEP	-5.06798	5.43861	183.849	6.99874e-42	9.26124e-41
Acinar	ENSG00000271858	CYB561D2-1	-1.59605	2.55786	183.846	7.01182e-42	9.27119e-41
Acinar	ENSG00000100714	MTHFD1	-1.04415	3.38291	183.811	7.13285e-42	9.42374e-41
Acinar	ENSG00000111859	NEDD9	1.5841	4.08934	183.602	7.92582e-42	1.04631e-40
Acinar	ENSG00000161992	PRR35	-3.79493	2.61791	183.594	7.95704e-42	1.0496e-40
Acinar	ENSG00000261115	TMEM178B	4.76988	1.51822	183.569	8.05862e-42	1.06216e-40
Acinar	ENSG00000184905	TCEAL2	1.23649	5.06619	183.493	8.37151e-42	1.10252e-40
Acinar	ENSG00000155961	RAB39B	1.83756	2.63965	183.425	8.66302e-42	1.14002e-40
Acinar	ENSG00000169994	MYO7B	4.54631	0.415507	183.416	8.70275e-42	1.14434e-40
Acinar	ENSG00000100320	RBFOX2	0.876451	5.60997	183.315	9.15559e-42	1.20293e-40
Acinar	ENSG00000183778	B3GALT5	2.7142	3.02831	183.121	1.00936e-41	1.32513e-40
Acinar	ENSG00000223969	AC002456.2	2.38486	1.45095	183.017	1.06362e-41	1.39527e-40
Acinar	ENSG00000152611	CAPSL	2.70039	3.11493	182.673	1.26426e-41	1.65717e-40
Acinar	ENSG00000124875	CXCL6	3.40943	0.769593	182.306	1.52063e-41	1.99164e-40
Acinar	ENSG00000128708	HAT1	-1.00062	4.80735	182.244	1.5682e-41	2.05234e-40
Acinar	ENSG00000143850	PLEKHA6	1.38859	3.23634	182.206	1.59869e-41	2.0906e-40
Acinar	ENSG00000074842	MYDGF	-1.34776	7.41083	181.963	1.80649e-41	2.36048e-40
Acinar	ENSG00000058262	SEC61A1	-0.961396	5.88108	181.947	1.8215e-41	2.37823e-40
Acinar	ENSG00000139182	CLSTN3	1.23609	3.84041	181.855	1.90746e-41	2.48851e-40
Acinar	ENSG00000104723	TUSC3	1.1826	6.38184	181.827	1.93396e-41	2.5211e-40
Acinar	ENSG00000205744	DENND1C	-3.2191	0.732892	181.63	2.13553e-41	2.77952e-40
Acinar	ENSG00000188157	AGRN	1.06952	3.86033	181.631	2.13503e-41	2.77952e-40
Acinar	ENSG00000064225	ST3GAL6	2.21227	3.1089	181.563	2.20872e-41	2.87255e-40
Acinar	ENSG00000082212	ME2	0.958915	3.96044	181.161	2.70309e-41	3.51275e-40
Acinar	ENSG00000173376	NDNF	-3.13807	1.05307	181.132	2.74261e-41	3.56133e-40
Acinar	ENSG00000114023	FAM162A	-1.52797	6.63034	180.946	3.01175e-41	3.90777e-40
Acinar	ENSG00000143457	GOLPH3L	-1.04805	4.45827	180.792	3.25528e-41	4.22047e-40
Acinar	ENSG00000105655	ISYNA1	0.955033	6.29759	180.73	3.35811e-41	4.3504e-40
Acinar	ENSG00000158669	GPAT4	1.19921	3.94646	180.712	3.38848e-41	4.38634e-40
Acinar	ENSG00000213722	DDAH2	0.945063	6.2031	180.594	3.59601e-41	4.65136e-40
Acinar	ENSG00000124780	KCNK17	4.84508	3.69278	180.464	3.83856e-41	4.96124e-40
Acinar	ENSG00000001626	CFTR	2.60877	6.27642	180.23	4.31816e-41	5.57679e-40
Acinar	ENSG00000178828	RNF186	-4.12658	6.04934	180.194	4.3955e-41	5.67227e-40
Acinar	ENSG00000169760	NLGN1	3.54825	1.31183	180.142	4.51302e-41	5.81942e-40
Acinar	ENSG00000162772	ATF3	-2.38997	9.16533	179.994	4.86023e-41	6.26229e-40
Acinar	ENSG00000117525	F3	-2.87077	6.45365	179.957	4.95325e-41	6.37722e-40
Acinar	ENSG00000232985	RP11-442O18.1	-2.71415	1.44814	179.902	5.09013e-41	6.54839e-40
Acinar	ENSG00000112246	SIM1	1.20752	5.06313	179.792	5.38099e-41	6.91722e-40
Acinar	ENSG00000170775	GPR37	2.05474	1.40035	179.626	5.85044e-41	7.5149e-40
Acinar	ENSG00000185565	LSAMP	2.6367	2.4566	179.58	5.98514e-41	7.68201e-40
Acinar	ENSG00000185924	RTN4RL1	3.36716	0.591564	179.49	6.26196e-41	8.03113e-40
Acinar	ENSG00000136541	ERMN	6.44156	0.03631	179.467	6.33434e-41	8.11771e-40
Acinar	ENSG00000164654	MIOS	-1.06238	3.9071	179.45	6.39035e-41	8.18318e-40
Acinar	ENSG00000117154	IGSF21	4.49543	-0.037529	179.226	7.1532e-41	9.15302e-40
Acinar	ENSG00000170624	SGCD	2.45873	2.19642	179.022	7.92602e-41	1.01341e-39
Acinar	ENSG00000132535	DLG4	2.26677	2.74918	178.994	8.03571e-41	1.02665e-39
Acinar	ENSG00000214944	ARHGEF28	-1.41558	3.8004	178.947	8.22961e-41	1.05062e-39
Acinar	ENSG00000149639	SOGA1	1.41365	3.52726	178.944	8.23992e-41	1.05113e-39
Acinar	ENSG00000130584	ZBTB46	3.12153	0.855156	178.92	8.34017e-41	1.0631e-39
Acinar	ENSG00000128268	MGAT3	2.70248	1.21656	178.864	8.57877e-41	1.09268e-39
Acinar	ENSG00000148498	PARD3	-1.31979	5.37553	178.842	8.67585e-41	1.1042e-39
Acinar	ENSG00000149179	C11orf49	0.901757	4.90923	178.828	8.73738e-41	1.11118e-39
Acinar	ENSG00000253250	C8orf88	4.07293	0.486467	178.545	1.00737e-40	1.28015e-39
Acinar	ENSG00000135476	ESPL1	3.6207	1.42601	178.347	1.11282e-40	1.41308e-39
Acinar	ENSG00000125648	SLC25A23	-1.02194	4.1475	178.209	1.19226e-40	1.5128e-39
Acinar	ENSG00000160318	CLDND2	-1.7351	2.112	178.044	1.29582e-40	1.64295e-39
Acinar	ENSG00000187260	WDR86	3.00194	1.46951	177.932	1.37085e-40	1.73676e-39
Acinar	ENSG00000182985	CADM1	1.80156	6.06394	177.88	1.40718e-40	1.78143e-39
Acinar	ENSG00000165507	C10orf10	1.30472	5.74826	177.38	1.80922e-40	2.28866e-39
Acinar	ENSG00000125148	MT2A	-4.42922	11.1102	177.305	1.87907e-40	2.37522e-39
Acinar	ENSG00000116833	NR5A2	-2.12601	5.8268	177.089	2.09424e-40	2.64519e-39
Acinar	ENSG00000064652	SNX24	1.00571	3.50049	177.087	2.09646e-40	2.64599e-39
Acinar	ENSG00000165066	NKX6-3	6.75313	-0.121875	177.038	2.14889e-40	2.71011e-39
Acinar	ENSG00000104447	TRPS1	1.66675	1.90401	176.982	2.21048e-40	2.78568e-39
Acinar	ENSG00000078369	GNB1	0.984617	5.89903	176.935	2.26266e-40	2.84927e-39
Acinar	ENSG00000096092	TMEM14A	-1.40369	6.52572	176.853	2.35805e-40	2.96715e-39
Acinar	ENSG00000196935	SRGAP1	1.44325	3.03202	176.704	2.54116e-40	3.19515e-39
Acinar	ENSG00000240583	AQP1	1.58224	3.74507	176.697	2.5504e-40	3.20435e-39
Acinar	ENSG00000134138	MEIS2	2.39961	7.76125	176.524	2.78222e-40	3.49298e-39
Acinar	ENSG00000144847	IGSF11	3.55011	0.891692	176.464	2.86726e-40	3.59703e-39
Acinar	ENSG00000142694	EVA1B	1.51257	5.27821	176.461	2.87128e-40	3.59936e-39
Acinar	ENSG00000197273	GUCA2A	4.65903	0.743666	176.458	2.87629e-40	3.60293e-39
Acinar	ENSG00000110092	CCND1	1.65115	6.75913	176.445	2.8954e-40	3.62414e-39
Acinar	ENSG00000132640	BTBD3	1.30741	5.05082	176.375	2.9987e-40	3.75063e-39
Acinar	ENSG00000010278	CD9	2.54439	3.07163	176.293	3.12535e-40	3.9061e-39
Acinar	ENSG00000197977	ELOVL2	2.8138	1.60706	176.237	3.21388e-40	4.01374e-39
Acinar	ENSG00000109084	TMEM97	-1.67983	6.34054	176.05	3.53112e-40	4.40663e-39
Acinar	ENSG00000138772	ANXA3	2.24091	3.50558	175.935	3.74043e-40	4.66434e-39
Acinar	ENSG00000181518	OR8D4	-5.5674	-0.663049	175.897	3.81307e-40	4.75136e-39
Acinar	ENSG00000223572	CKMT1A	1.92929	2.31144	175.847	3.91109e-40	4.86986e-39
Acinar	ENSG00000006118	TMEM132A	1.86299	4.58113	175.772	4.06054e-40	5.05218e-39
Acinar	ENSG00000120756	PLS1	1.44363	3.58821	175.732	4.14275e-40	5.15061e-39
Acinar	ENSG00000152952	PLOD2	-0.967882	4.47131	175.499	4.65731e-40	5.78604e-39
Acinar	ENSG00000148229	POLE3	-1.37084	5.18583	175.459	4.7534e-40	5.90101e-39
Acinar	ENSG00000130224	LRCH2	4.26524	1.93269	175.423	4.83896e-40	6.00276e-39
Acinar	ENSG00000145506	NKD2	-3.47027	2.45361	175.39	4.92112e-40	6.10014e-39
Acinar	ENSG00000172818	OVOL1	-3.45812	3.77963	175.216	5.37179e-40	6.65383e-39
Acinar	ENSG00000148935	GAS2	-1.351	3.19334	175.182	5.46426e-40	6.76334e-39
Acinar	ENSG00000182366	FAM87A	-3.6137	0.358923	175.178	5.47482e-40	6.76947e-39
Acinar	ENSG00000104964	AES	0.747972	6.92309	175.177	5.47734e-40	6.76947e-39
Acinar	ENSG00000091704	CPA1	-5.71839	14.8221	174.849	6.45877e-40	7.97651e-39
Acinar	ENSG00000171729	TMEM51	-1.92888	5.25384	174.714	6.9114e-40	8.52918e-39
Acinar	ENSG00000204472	AIF1	3.25177	3.6905	174.553	7.49695e-40	9.24495e-39
Acinar	ENSG00000151882	CCL28	3.03983	1.05063	174.352	8.29383e-40	1.02201e-38
Acinar	ENSG00000249715	FER1L5	2.54704	1.25541	174.264	8.66889e-40	1.06743e-38
Acinar	ENSG00000158813	EDA	-2.29383	1.23052	174.241	8.76693e-40	1.07871e-38
Acinar	ENSG00000158089	GALNT14	4.17012	0.457963	174.048	9.66424e-40	1.18824e-38
Acinar	ENSG00000065615	CYB5R4	1.53629	2.836	173.987	9.96204e-40	1.22395e-38
Acinar	ENSG00000131148	EMC8	-1.14354	4.82631	173.888	1.04716e-39	1.28561e-38
Acinar	ENSG00000085998	POMGNT1	1.03487	4.22179	173.881	1.0511e-39	1.2895e-38
Acinar	ENSG00000267649	CTD-2587H24.10	4.36638	0.185784	173.869	1.05752e-39	1.29642e-38
Acinar	ENSG00000162076	FLYWCH2	1.09382	4.87228	173.697	1.15284e-39	1.41223e-38
Acinar	ENSG00000139200	PIANP	4.53279	0.396649	173.632	1.19113e-39	1.45806e-38
Acinar	ENSG00000120725	SIL1	-1.29797	5.99029	173.613	1.20232e-39	1.47068e-38
Acinar	ENSG00000167081	PBX3	1.53731	3.23418	173.577	1.22448e-39	1.49668e-38
Acinar	ENSG00000090447	TFAP4	-1.72383	4.2095	173.563	1.23325e-39	1.5063e-38
Acinar	ENSG00000278845	MRPL45	-0.813487	5.24917	173.556	1.23775e-39	1.51068e-38
Acinar	ENSG00000151914	DST	1.75782	6.47114	173.51	1.26642e-39	1.54455e-38
Acinar	ENSG00000204092	LINC00951	3.91852	0.357552	173.44	1.312e-39	1.59898e-38
Acinar	ENSG00000272168	CASC15	2.69784	1.99392	173.434	1.3161e-39	1.6028e-38
Acinar	ENSG00000071246	VASH1	2.05704	2.27183	173.187	1.48949e-39	1.81263e-38
Acinar	ENSG00000163938	GNL3	-0.766628	5.86137	173.173	1.50018e-39	1.82431e-38
Acinar	ENSG00000134590	FAM127A	0.791354	5.35382	173.171	1.50147e-39	1.82455e-38
Acinar	ENSG00000083937	CHMP2B	-1.37616	6.32885	172.946	1.68166e-39	2.04202e-38
Acinar	ENSG00000138443	ABI2	1.07223	5.38	172.915	1.70832e-39	2.07288e-38
Acinar	ENSG00000048471	SNX29	1.76557	3.78306	172.833	1.78028e-39	2.15863e-38
Acinar	ENSG00000178538	CA8	1.78412	3.16925	172.694	1.90863e-39	2.31256e-38
Acinar	ENSG00000139436	GIT2	-1.50849	4.91563	172.645	1.95662e-39	2.36899e-38
Acinar	ENSG00000126214	KLC1	1.11978	4.72916	172.611	1.99066e-39	2.40845e-38
Acinar	ENSG00000136274	NACAD	2.82136	1.59979	172.564	2.03783e-39	2.46373e-38
Acinar	ENSG00000125966	MMP24	3.36448	0.900252	172.492	2.1126e-39	2.55228e-38
Acinar	ENSG00000164114	MAP9	0.844218	5.86476	172.413	2.19822e-39	2.65379e-38
Acinar	ENSG00000175356	SCUBE2	-3.45758	2.4359	172.22	2.42241e-39	2.92233e-38
Acinar	ENSG00000103253	HAGHL	3.48166	0.919764	172.115	2.5545e-39	3.07945e-38
Acinar	ENSG00000197872	FAM49A	4.40074	0.218398	172.043	2.64839e-39	3.19032e-38
Acinar	ENSG00000115840	SLC25A12	3.52033	1.82803	172.023	2.67512e-39	3.22019e-38
Acinar	ENSG00000074211	PPP2R2C	5.35753	0.188924	171.865	2.89682e-39	3.48455e-38
Acinar	ENSG00000090534	THPO	-4.85053	0.522321	171.742	3.08034e-39	3.70264e-38
Acinar	ENSG00000143774	GUK1	0.848123	7.15597	171.708	3.13408e-39	3.76451e-38
Acinar	ENSG00000075673	ATP12A	1.90801	2.96268	171.672	3.1919e-39	3.8312e-38
Acinar	ENSG00000198720	ANKRD13B	3.0238	0.74114	171.655	3.2183e-39	3.86011e-38
Acinar	ENSG00000136014	USP44	-1.43017	3.35146	171.537	3.41497e-39	4.09305e-38
Acinar	ENSG00000162771	FAM71A	-1.88979	0.636161	171.523	3.44014e-39	4.12025e-38
Acinar	ENSG00000184672	RALYL	1.83981	3.40676	171.371	3.71344e-39	4.44439e-38
Acinar	ENSG00000104219	ZDHHC2	-1.23049	4.93851	171.326	3.79854e-39	4.54298e-38
Acinar	ENSG00000197702	PARVA	-1.35622	5.09663	171.234	3.97758e-39	4.7537e-38
Acinar	ENSG00000229666	MAST4-AS1	3.15297	0.726423	171.174	4.09875e-39	4.89499e-38
Acinar	ENSG00000100979	PLTP	-4.9223	7.10991	171.169	4.11096e-39	4.90606e-38
Acinar	ENSG00000087495	PHACTR3	4.4375	0.824593	171.111	4.23201e-39	5.0469e-38
Acinar	ENSG00000184226	PCDH9	1.88153	2.52937	170.868	4.78284e-39	5.69973e-38
Acinar	ENSG00000176532	PRR15	-3.18597	1.09945	170.85	4.82463e-39	5.74541e-38
Acinar	ENSG00000273297	RP11-38M8.1	4.18938	0.515735	170.846	4.83389e-39	5.75233e-38
Acinar	ENSG00000091664	SLC17A6	5.6408	1.15094	170.839	4.85197e-39	5.76973e-38
Acinar	ENSG00000091129	NRCAM	-1.02144	5.86429	170.678	5.26133e-39	6.25205e-38
Acinar	ENSG00000116741	RGS2	1.79387	4.91196	170.651	5.33196e-39	6.33147e-38
Acinar	ENSG00000144802	NFKBIZ	-1.86971	6.06911	170.615	5.43138e-39	6.44492e-38
Acinar	ENSG00000101460	MAP1LC3A	1.5827	5.76318	170.597	5.47928e-39	6.49714e-38
Acinar	ENSG00000167614	TTYH1	2.03505	5.94552	170.418	5.9963e-39	7.10515e-38
Acinar	ENSG00000234779	RP11-62F24.2	-5.57879	-0.427793	170.002	7.39215e-39	8.75289e-38
Acinar	ENSG00000260947	RP11-384P7.7	5.80084	0.346511	169.857	7.94946e-39	9.40611e-38
Acinar	ENSG00000156414	TDRD9	5.07989	1.37925	169.801	8.17651e-39	9.6679e-38
Acinar	ENSG00000177990	DPY19L2	2.73705	1.27306	169.637	8.88192e-39	1.04945e-37
Acinar	ENSG00000198892	SHISA4	2.20766	1.77068	169.545	9.30114e-39	1.09821e-37
Acinar	ENSG00000118276	B4GALT6	1.61422	2.3015	169.396	1.00231e-38	1.18262e-37
Acinar	ENSG00000172331	BPGM	1.1098	3.8465	169.384	1.00836e-38	1.18891e-37
Acinar	ENSG00000143153	ATP1B1	1.27982	8.1106	169.226	1.09195e-38	1.28655e-37
Acinar	ENSG00000131398	KCNC3	1.89291	2.57828	169.219	1.09594e-38	1.29035e-37
Acinar	ENSG00000149577	SIDT2	-1.13488	3.71776	169.126	1.14846e-38	1.35123e-37
Acinar	ENSG00000169933	FRMPD4	5.36981	0.0565058	169.106	1.16019e-38	1.36407e-37
Acinar	ENSG00000185477	GPRIN3	1.55649	4.74238	169.078	1.17646e-38	1.38221e-37
Acinar	ENSG00000182093	WRB	0.950159	5.3618	168.979	1.23663e-38	1.45189e-37
Acinar	ENSG00000137266	SLC22A23	-2.12251	2.74145	168.872	1.30447e-38	1.53045e-37
Acinar	ENSG00000135185	TMEM243	-1.57915	3.86599	168.87	1.30596e-38	1.53113e-37
Acinar	ENSG00000070718	AP3M2	1.08385	3.61254	168.78	1.36633e-38	1.60077e-37
Acinar	ENSG00000118263	KLF7	2.45473	3.23283	168.521	1.55669e-38	1.82252e-37
Acinar	ENSG00000249425	RP11-502M1.2	-5.58745	-1.23292	167.98	2.04385e-38	2.38979e-37
Acinar	ENSG00000133639	BTG1	-1.15769	9.2341	167.979	2.04408e-38	2.38979e-37
Acinar	ENSG00000175600	SUGCT	-3.25688	2.46801	167.64	2.42467e-38	2.83275e-37
Acinar	ENSG00000106628	POLD2	-1.2259	6.59613	167.623	2.44498e-38	2.85447e-37
Acinar	ENSG00000145331	TRMT10A	-1.03407	3.79979	167.543	2.54554e-38	2.96979e-37
Acinar	ENSG00000160180	TFF3	-3.33035	8.46612	167.46	2.65408e-38	3.09426e-37
Acinar	ENSG00000062038	CDH3	1.85446	2.41467	167.321	2.84692e-38	3.31676e-37
Acinar	ENSG00000142515	KLK3	-5.094	-0.526638	167.207	3.01405e-38	3.50902e-37
Acinar	ENSG00000006611	USH1C	1.91549	4.44548	167.2	3.02487e-38	3.51916e-37
Acinar	ENSG00000139220	PPFIA2	4.6046	1.39733	167.158	3.08996e-38	3.59238e-37
Acinar	ENSG00000178222	RNF212	-2.40106	3.56647	166.898	3.5208e-38	4.09041e-37
Acinar	ENSG00000153066	TXNDC11	-1.10766	3.86616	166.885	3.54364e-38	4.11408e-37
Acinar	ENSG00000125850	OVOL2	2.21071	1.8409	166.88	3.55382e-38	4.12303e-37
Acinar	ENSG00000166347	CYB5A	-1.73648	9.08617	166.873	3.56528e-38	4.13201e-37
Acinar	ENSG00000261652	C15orf65	1.58451	2.82539	166.873	3.56653e-38	4.13201e-37
Acinar	ENSG00000137166	FOXP4	0.890089	4.63688	166.835	3.63553e-38	4.20903e-37
Acinar	ENSG00000184828	ZBTB7C	-1.84375	1.65973	166.481	4.34383e-38	5.02557e-37
Acinar	ENSG00000214860	EVPLL	6.31481	-0.520696	166.454	4.40203e-38	5.08937e-37
Acinar	ENSG00000170890	PLA2G1B	-4.88977	10.0416	166.439	4.43611e-38	5.12521e-37
Acinar	ENSG00000233508	RP1-269M15.3	6.79657	-0.258918	166.406	4.50891e-38	5.20572e-37
Acinar	ENSG00000169258	GPRIN1	4.48839	0.842495	166.389	4.54879e-38	5.24575e-37
Acinar	ENSG00000072778	ACADVL	-0.911356	6.43659	166.389	4.54988e-38	5.24575e-37
Acinar	ENSG00000127946	HIP1	1.27733	2.99734	166.221	4.95102e-38	5.70429e-37
Acinar	ENSG00000166710	B2M	-1.3665	8.25803	166.132	5.17586e-38	5.95922e-37
Acinar	ENSG00000123496	IL13RA2	6.56525	-0.0500743	165.937	5.71059e-38	6.57034e-37
Acinar	ENSG00000180879	SSR4	-1.78626	10.7873	165.806	6.10012e-38	7.01367e-37
Acinar	ENSG00000131828	PDHA1	-1.31507	6.16784	165.7	6.43397e-38	7.39241e-37
Acinar	ENSG00000264443	RP4-594I10.3	2.03005	1.81918	165.487	7.15899e-38	8.21976e-37
Acinar	ENSG00000100347	SAMM50	-1.19228	5.54206	165.375	7.57386e-38	8.69012e-37
Acinar	ENSG00000125744	RTN2	2.31027	2.80899	165.348	7.67802e-38	8.80357e-37
Acinar	ENSG00000197860	SGTB	1.23885	3.20145	165.315	7.80599e-38	8.94414e-37
Acinar	ENSG00000137713	PPP2R1B	-1.18816	4.43176	165.196	8.28927e-38	9.49136e-37
Acinar	ENSG00000138135	CH25H	-3.24961	1.70028	165.175	8.37687e-38	9.58508e-37
Acinar	ENSG00000159388	BTG2	-2.00867	9.76895	165.157	8.45323e-38	9.66581e-37
Acinar	ENSG00000196511	TPK1	1.70353	1.79245	165.039	8.97154e-38	1.02514e-36
Acinar	ENSG00000086189	DIMT1	-1.09276	4.2556	164.796	1.01379e-37	1.15762e-36
Acinar	ENSG00000158457	TSPAN33	1.55821	3.28018	164.704	1.06156e-37	1.21134e-36
Acinar	ENSG00000221890	NPTXR	2.24245	2.3217	164.662	1.08454e-37	1.23671e-36
Acinar	ENSG00000125970	RALY	-0.938533	5.77224	164.51	1.17032e-37	1.33362e-36
Acinar	ENSG00000064201	TSPAN32	4.10897	1.0601	164.408	1.23189e-37	1.40283e-36
Acinar	ENSG00000129038	LOXL1	1.257	3.37531	164.181	1.38117e-37	1.57175e-36
Acinar	ENSG00000163050	ADCK3	-1.07964	4.67514	164.117	1.42611e-37	1.62177e-36
Acinar	ENSG00000176485	PLA2G16	-1.43626	5.70879	164.113	1.42933e-37	1.62432e-36
Acinar	ENSG00000159164	SV2A	1.8835	3.07847	164.076	1.45594e-37	1.65344e-36
Acinar	ENSG00000184194	GPR173	3.10398	1.3263	164.037	1.48469e-37	1.68494e-36
Acinar	ENSG00000015413	DPEP1	-3.49739	8.63517	163.875	1.61077e-37	1.82678e-36
Acinar	ENSG00000130707	ASS1	1.53208	2.69653	163.736	1.72719e-37	1.95748e-36
Acinar	ENSG00000235590	GNAS-AS1	3.82301	1.7269	163.697	1.76175e-37	1.99529e-36
Acinar	ENSG00000150938	CRIM1	1.51656	2.95261	163.627	1.82516e-37	2.0657e-36
Acinar	ENSG00000071054	MAP4K4	1.09437	5.42196	163.5	1.94515e-37	2.20001e-36
Acinar	ENSG00000033627	ATP6V0A1	1.02587	4.85886	163.48	1.96531e-37	2.22131e-36
Acinar	ENSG00000116016	EPAS1	-1.3302	4.20033	163.467	1.97826e-37	2.23443e-36
Acinar	ENSG00000084444	FAM234B	2.37909	1.7428	163.377	2.06972e-37	2.33615e-36
Acinar	ENSG00000071537	SEL1L	-3.02713	8.11005	163.135	2.33726e-37	2.63634e-36
Acinar	ENSG00000079385	CEACAM1	3.95748	0.677186	162.999	2.50227e-37	2.82056e-36
Acinar	ENSG00000159708	LRRC36	2.73953	1.35054	162.961	2.55072e-37	2.87323e-36
Acinar	ENSG00000179083	FAM133A	4.00648	0.0350654	162.92	2.60395e-37	2.9312e-36
Acinar	ENSG00000117308	GALE	-0.986554	4.17414	162.879	2.65838e-37	2.99045e-36
Acinar	ENSG00000134594	RAB33A	4.97307	0.140844	162.833	2.72049e-37	3.05826e-36
Acinar	ENSG00000147955	SIGMAR1	-1.44285	4.15992	162.801	2.76471e-37	3.10587e-36
Acinar	ENSG00000254726	MEX3A	1.33562	4.5473	162.725	2.87271e-37	3.22503e-36
Acinar	ENSG00000164199	ADGRV1	1.82828	3.85541	162.676	2.94484e-37	3.30378e-36
Acinar	ENSG00000149541	B3GAT3	0.988836	4.7891	162.665	2.96052e-37	3.31913e-36
Acinar	ENSG00000134775	FHOD3	4.07684	0.488852	162.65	2.98375e-37	3.34293e-36
Acinar	ENSG00000185909	KLHDC8B	1.05733	5.0502	162.532	3.1653e-37	3.54395e-36
Acinar	ENSG00000077348	EXOSC5	-0.923364	3.944	162.521	3.18319e-37	3.56159e-36
Acinar	ENSG00000132026	RTBDN	4.95811	-0.209821	162.513	3.1959e-37	3.57341e-36
Acinar	ENSG00000160299	PCNT	1.44422	4.24172	162.436	3.32182e-37	3.7117e-36
Acinar	ENSG00000240291	RP11-499P20.2	1.36348	3.42331	162.327	3.50925e-37	3.91851e-36
Acinar	ENSG00000187837	HIST1H1C	-1.91458	6.90303	162.277	3.59952e-37	4.01661e-36
Acinar	ENSG00000138622	HCN4	4.72135	-0.0154573	162.234	3.6785e-37	4.10199e-36
Acinar	ENSG00000155463	OXA1L	-1.26893	6.15621	162.179	3.7812e-37	4.2137e-36
Acinar	ENSG00000151025	GPR158	4.31166	0.340103	162.162	3.81404e-37	4.24745e-36
Acinar	ENSG00000101247	NDUFAF5	0.995966	3.43577	162.064	4.00496e-37	4.45709e-36
Acinar	ENSG00000204934	ATP6V0E2-AS1	3.16809	0.261877	162.031	4.07283e-37	4.5296e-36
Acinar	ENSG00000163110	PDLIM5	-0.757211	5.27967	161.974	4.1909e-37	4.6578e-36
Acinar	ENSG00000184992	BRI3BP	-0.908123	4.60267	161.87	4.41581e-37	4.90449e-36
Acinar	ENSG00000225746	SNHG23	-1.32267	6.09593	161.766	4.65466e-37	5.16633e-36
Acinar	ENSG00000204711	C9orf135	3.367	0.519688	161.715	4.77434e-37	5.29564e-36
Acinar	ENSG00000119640	ACYP1	1.18353	4.47163	161.71	4.78697e-37	5.30611e-36
Acinar	ENSG00000167779	IGFBP6	-2.01495	3.21617	161.708	4.7915e-37	5.30761e-36
Acinar	ENSG00000235106	LINC00094	1.08869	3.45936	161.691	4.83237e-37	5.34932e-36
Acinar	ENSG00000271614	LINC00936	1.37525	3.90845	161.461	5.42621e-37	6.0027e-36
Acinar	ENSG00000182606	TRAK1	1.22076	4.12274	161.363	5.70051e-37	6.30196e-36
Acinar	ENSG00000053371	AKR7A2	-1.126	6.47495	161.191	6.21644e-37	6.86776e-36
Acinar	ENSG00000187122	SLIT1	2.29653	1.40717	161.185	6.23413e-37	6.88275e-36
Acinar	ENSG00000185519	FAM131C	2.37408	2.9439	161.102	6.49862e-37	7.17e-36
Acinar	ENSG00000168575	SLC20A2	-1.08243	4.17473	160.993	6.86604e-37	7.57037e-36
Acinar	ENSG00000150394	CDH8	4.51093	0.416117	160.949	7.01837e-37	7.7332e-36
Acinar	ENSG00000135049	AGTPBP1	0.959952	3.70625	160.867	7.31683e-37	8.05141e-36
Acinar	ENSG00000162804	SNED1	3.73461	1.0278	160.867	7.31659e-37	8.05141e-36
Acinar	ENSG00000124232	RBPJL	-3.8895	7.07587	160.802	7.56012e-37	8.31364e-36
Acinar	ENSG00000174306	ZHX3	1.20318	3.02522	160.778	7.64982e-37	8.40673e-36
Acinar	ENSG00000116337	AMPD2	1.30722	3.69328	160.654	8.14269e-37	8.94247e-36
Acinar	ENSG00000087903	RFX2	1.63977	2.66114	160.555	8.55807e-37	9.39245e-36
Acinar	ENSG00000196950	SLC39A10	1.17834	5.17223	160.492	8.83354e-37	9.6884e-36
Acinar	ENSG00000155330	C16orf87	1.1301	4.82304	160.456	8.99716e-37	9.86136e-36
Acinar	ENSG00000185090	MANEAL	1.27616	3.67233	160.45	9.02193e-37	9.88201e-36
Acinar	ENSG00000085365	SCAMP1	1.07003	5.24725	160.427	9.12895e-37	9.99266e-36
Acinar	ENSG00000090674	MCOLN1	1.38534	3.36651	160.201	1.02249e-36	1.11849e-35
Acinar	ENSG00000164975	SNAPC3	1.00419	4.26743	160.174	1.03685e-36	1.13346e-35
Acinar	ENSG00000105202	FBL	-1.05434	7.09831	160.067	1.09387e-36	1.19501e-35
Acinar	ENSG00000075035	WSCD2	6.07369	0.0615994	160.048	1.10473e-36	1.20609e-35
Acinar	ENSG00000198513	ATL1	1.38129	2.91406	160.009	1.12664e-36	1.22919e-35
Acinar	ENSG00000249853	HS3ST5	4.49364	0.163664	159.886	1.19815e-36	1.30465e-35
Acinar	ENSG00000142546	NOSIP	-1.70501	6.86027	159.886	1.19806e-36	1.30465e-35
Acinar	ENSG00000138162	TACC2	1.21681	3.14476	159.738	1.29063e-36	1.40444e-35
Acinar	ENSG00000171174	RBKS	-1.30618	3.44282	159.711	1.30841e-36	1.42285e-35
Acinar	ENSG00000131187	F12	2.68564	1.57024	159.657	1.34432e-36	1.45999e-35
Acinar	ENSG00000175206	NPPA	5.70149	0.0042353	159.657	1.34428e-36	1.45999e-35
Acinar	ENSG00000185559	DLK1	-2.10765	12.7457	159.558	1.41337e-36	1.53399e-35
Acinar	ENSG00000134313	KIDINS220	0.893162	6.05795	159.543	1.42422e-36	1.54476e-35
Acinar	ENSG00000231437	RP11-88H9.2	-3.21748	0.618012	159.437	1.502e-36	1.62806e-35
Acinar	ENSG00000145246	ATP10D	1.1151	3.47874	159.023	1.84957e-36	2.0035e-35
Acinar	ENSG00000223403	MEG9	-1.58338	2.77454	159.02	1.85299e-36	2.0059e-35
Acinar	ENSG00000119411	BSPRY	-1.87678	5.12739	158.805	2.0642e-36	2.23309e-35
Acinar	ENSG00000250510	GPR162	4.04202	1.1114	158.795	2.07461e-36	2.2429e-35
Acinar	ENSG00000139910	NOVA1	2.76613	4.17296	158.642	2.24072e-36	2.4209e-35
Acinar	ENSG00000101384	JAG1	-1.81027	5.47925	158.614	2.27262e-36	2.45378e-35
Acinar	ENSG00000109654	TRIM2	1.45194	4.11243	158.494	2.4142e-36	2.60496e-35
Acinar	ENSG00000214706	IFRD2	-0.965373	4.47441	158.466	2.44796e-36	2.63968e-35
Acinar	ENSG00000151812	SLC35F4	6.70724	-0.315626	158.434	2.48794e-36	2.68106e-35
Acinar	ENSG00000110330	BIRC2	-1.21402	6.17572	158.37	2.56916e-36	2.76679e-35
Acinar	ENSG00000174992	ZG16	-5.49787	-0.144226	158.311	2.64676e-36	2.84851e-35
Acinar	ENSG00000104537	ANXA13	2.39346	2.57491	158.302	2.65832e-36	2.85911e-35
Acinar	ENSG00000277531	LLNLF-187D8.1	4.72202	-0.0528318	158.298	2.66434e-36	2.86373e-35
Acinar	ENSG00000173465	SSSCA1	-1.21349	5.42153	158.133	2.89446e-36	3.10908e-35
Acinar	ENSG00000126500	FLRT1	4.15753	0.250779	158.061	3.00102e-36	3.22145e-35
Acinar	ENSG00000182534	MXRA7	1.10073	5.47782	157.989	3.11178e-36	3.33821e-35
Acinar	ENSG00000107438	PDLIM1	1.4393	4.0878	157.894	3.26486e-36	3.50017e-35
Acinar	ENSG00000156990	RPUSD3	-0.938109	5.26528	157.869	3.30493e-36	3.54084e-35
Acinar	ENSG00000169752	NRG4	-3.34868	3.40154	157.782	3.45429e-36	3.69723e-35
Acinar	ENSG00000248307	LINC00616	4.16931	0.240927	157.781	3.45533e-36	3.69723e-35
Acinar	ENSG00000112419	PHACTR2	1.67721	5.73998	157.767	3.48035e-36	3.72161e-35
Acinar	ENSG00000041515	MYO16	4.22189	0.373637	157.765	3.48398e-36	3.72309e-35
Acinar	ENSG00000163517	HDAC11	-1.65661	4.68322	157.661	3.67033e-36	3.91973e-35
Acinar	ENSG00000172932	ANKRD13D	1.51407	3.71255	157.646	3.69771e-36	3.94644e-35
Acinar	ENSG00000123131	PRDX4	-2.15553	8.41356	157.614	3.758e-36	4.00821e-35
Acinar	ENSG00000168497	SDPR	-3.63188	3.84708	157.585	3.81324e-36	4.06452e-35
Acinar	ENSG00000244694	PTCHD4	4.7947	-0.431449	157.541	3.89797e-36	4.15219e-35
Acinar	ENSG00000110013	SIAE	-1.03439	2.79118	157.485	4.00965e-36	4.26842e-35
Acinar	ENSG00000221963	APOL6	2.90665	1.32543	157.402	4.18171e-36	4.44875e-35
Acinar	ENSG00000110975	SYT10	5.65482	0.245604	157.289	4.42543e-36	4.70502e-35
Acinar	ENSG00000173406	DAB1	4.81276	0.433794	156.41	6.88874e-36	7.31928e-35
Acinar	ENSG00000007047	MARK4	1.04302	3.61557	156.408	6.89385e-36	7.32005e-35
Acinar	ENSG00000206418	RAB12	2.00447	3.19326	156.338	7.14345e-36	7.58024e-35
Acinar	ENSG00000175318	GRAMD2	5.35122	0.00401024	156.322	7.20001e-36	7.6354e-35
Acinar	ENSG00000167618	LAIR2	5.23154	0.11257	156.172	7.76323e-36	8.22745e-35
Acinar	ENSG00000196876	SCN8A	2.18429	1.65945	156.13	7.93142e-36	8.40035e-35
Acinar	ENSG00000116774	OLFML3	1.62973	4.18117	156.094	8.07441e-36	8.54636e-35
Acinar	ENSG00000131871	VIMP	-0.933586	6.44861	155.88	8.99296e-36	9.51256e-35
Acinar	ENSG00000225075	RP11-426L16.3	3.7116	0.222556	155.858	9.09391e-36	9.61323e-35
Acinar	ENSG00000145088	EAF2	-1.58154	3.29906	155.776	9.47788e-36	1.00128e-34
Acinar	ENSG00000129422	MTUS1	-2.34707	6.22853	155.659	1.00484e-35	1.06087e-34
Acinar	ENSG00000076864	RAP1GAP	1.6616	4.2582	155.626	1.02203e-35	1.07834e-34
Acinar	ENSG00000153179	RASSF3	-2.02614	2.30818	155.564	1.05415e-35	1.11152e-34
Acinar	ENSG00000213424	KRT222	4.13586	-0.135244	155.497	1.09024e-35	1.14886e-34
Acinar	ENSG00000167100	SAMD14	3.83678	0.520406	155.467	1.10679e-35	1.16555e-34
Acinar	ENSG00000263958	RP11-676J15.1	4.15055	0.59501	155.457	1.11266e-35	1.171e-34
Acinar	ENSG00000138028	CGREF1	4.65762	0.315436	155.454	1.11436e-35	1.17205e-34
Acinar	ENSG00000250120	PCDHA10	3.48027	0.55512	155.351	1.1733e-35	1.23326e-34
Acinar	ENSG00000113648	H2AFY	1.04967	6.39109	155.319	1.19233e-35	1.25247e-34
Acinar	ENSG00000244038	DDOST	-1.95262	7.82909	155.229	1.24768e-35	1.30896e-34
Acinar	ENSG00000147041	SYTL5	-4.98319	0.428215	155.23	1.24718e-35	1.30896e-34
Acinar	ENSG00000151422	FER	0.997995	3.85984	155.196	1.2688e-35	1.33029e-34
Acinar	ENSG00000092051	JPH4	3.92915	0.376364	154.967	1.4237e-35	1.49175e-34
Acinar	ENSG00000183484	GPR132	-4.00695	-0.0769765	154.935	1.44657e-35	1.51476e-34
Acinar	ENSG00000257084	U47924.27	-1.74729	4.38733	154.744	1.59239e-35	1.66641e-34
Acinar	ENSG00000164742	ADCY1	3.33281	1.53201	154.642	1.67656e-35	1.75316e-34
Acinar	ENSG00000069764	PLA2G10	-4.3985	0.619079	154.641	1.6774e-35	1.75316e-34
Acinar	ENSG00000267750	RUNDC3A-AS1	3.68348	0.737824	154.461	1.83689e-35	1.91865e-34
Acinar	ENSG00000147654	EBAG9	-0.940428	5.33966	154.426	1.86921e-35	1.95119e-34
Acinar	ENSG00000091879	ANGPT2	1.83646	2.48289	154.422	1.87259e-35	1.9535e-34
Acinar	ENSG00000116649	SRM	-1.45602	5.67884	154.202	2.09209e-35	2.18111e-34
Acinar	ENSG00000008083	JARID2	0.900112	4.52718	154.179	2.11685e-35	2.20555e-34
Acinar	ENSG00000145451	GLRA3	4.61197	0.122059	153.964	2.35858e-35	2.45587e-34
Acinar	ENSG00000256235	SMIM3	-2.67609	4.02931	153.665	2.74102e-35	2.85231e-34
Acinar	ENSG00000083444	PLOD1	-1.45219	4.01306	153.658	2.75041e-35	2.86029e-34
Acinar	ENSG00000085276	MECOM	-1.68611	3.9223	153.597	2.83731e-35	2.94882e-34
Acinar	ENSG00000162989	KCNJ3	4.08399	2.24673	153.575	2.86803e-35	2.97889e-34
Acinar	ENSG00000158050	DUSP2	-2.92166	6.69441	153.561	2.8891e-35	2.9989e-34
Acinar	ENSG00000251128	WWC2-AS1	-3.08278	-0.26877	153.552	2.90116e-35	3.00954e-34
Acinar	ENSG00000049540	ELN	-3.63629	4.91316	153.528	2.93708e-35	3.04491e-34
Acinar	ENSG00000150347	ARID5B	1.61491	5.06267	153.507	2.96759e-35	3.07463e-34
Acinar	ENSG00000122884	P4HA1	-0.992533	5.22532	153.404	3.12559e-35	3.2343e-34
Acinar	ENSG00000163545	NUAK2	1.54933	3.01986	153.405	3.12403e-35	3.2343e-34
Acinar	ENSG00000104892	KLC3	1.7424	1.29387	153.372	3.1769e-35	3.28536e-34
Acinar	ENSG00000188070	C11orf95	1.5203	3.70805	153.342	3.22461e-35	3.33263e-34
Acinar	ENSG00000196576	PLXNB2	1.12704	4.22346	152.927	3.97383e-35	4.1044e-34
Acinar	ENSG00000103449	SALL1	4.7756	-0.0174337	152.918	3.99282e-35	4.12146e-34
Acinar	ENSG00000235578	XXbac-B33L19.4	4.88478	-0.5066	152.896	4.03745e-35	4.16494e-34
Acinar	ENSG00000121057	AKAP1	-0.856348	3.83735	152.846	4.13905e-35	4.26711e-34
Acinar	ENSG00000177697	CD151	-1.32986	7.5336	152.788	4.26102e-35	4.39014e-34
Acinar	ENSG00000198221	MLLT4-AS1	1.72213	2.53469	152.761	4.3194e-35	4.44754e-34
Acinar	ENSG00000135423	GLS2	-1.86816	1.62091	152.664	4.53745e-35	4.66917e-34
Acinar	ENSG00000105784	RUNDC3B	2.94396	0.817675	152.616	4.64701e-35	4.77897e-34
Acinar	ENSG00000179292	TMEM151A	3.83642	0.757358	152.543	4.82005e-35	4.95385e-34
Acinar	ENSG00000271830	RP11-1C8.7	3.75137	-0.0347446	152.462	5.02107e-35	5.15728e-34
Acinar	ENSG00000126709	IFI6	1.22771	4.16506	152.45	5.05337e-35	5.18725e-34
Acinar	ENSG00000120742	SERP1	-1.54387	7.86092	152.446	5.06338e-35	5.19433e-34
Acinar	ENSG00000157330	C1orf158	5.90421	-0.0911136	152.382	5.22896e-35	5.36089e-34
Acinar	ENSG00000006652	IFRD1	-2.19833	7.17384	152.378	5.23785e-35	5.3667e-34
Acinar	ENSG00000099625	CBARP	3.42319	0.653451	151.947	6.50824e-35	6.66425e-34
Acinar	ENSG00000185897	FFAR3	5.06455	0.529653	151.834	6.88741e-35	7.04817e-34
Acinar	ENSG00000147481	SNTG1	5.73819	-0.186933	151.625	7.651e-35	7.82478e-34
Acinar	ENSG00000101180	HRH3	5.08942	-0.93147	151.455	8.33509e-35	8.51918e-34
Acinar	ENSG00000183018	SPNS2	1.65268	2.43412	151.42	8.48209e-35	8.66411e-34
Acinar	ENSG00000171885	AQP4	3.66157	0.140701	151.4	8.57028e-35	8.74883e-34
Acinar	ENSG00000114405	C3orf14	1.32361	5.81801	151.25	9.24101e-35	9.42775e-34
Acinar	ENSG00000139505	MTMR6	1.00827	3.78634	151.148	9.72637e-35	9.91685e-34
Acinar	ENSG00000259943	RP1-39G22.7	0.876862	3.91526	150.959	1.06972e-34	1.09e-33
Acinar	ENSG00000120158	RCL1	-0.978745	3.22477	150.932	1.08482e-34	1.10471e-33
Acinar	ENSG00000126583	PRKCG	3.80725	0.31554	150.782	1.16953e-34	1.19025e-33
Acinar	ENSG00000169223	LMAN2	-1.91458	7.90857	150.711	1.21238e-34	1.23311e-33
Acinar	ENSG00000116871	MAP7D1	1.10779	3.42432	150.672	1.23623e-34	1.25659e-33
Acinar	ENSG00000100583	SAMD15	1.55409	2.55849	150.645	1.25321e-34	1.27308e-33
Acinar	ENSG00000139540	SLC39A5	-4.28202	6.16252	150.588	1.28939e-34	1.30903e-33
Acinar	ENSG00000114923	SLC4A3	2.01342	1.77453	150.487	1.35702e-34	1.37686e-33
Acinar	ENSG00000170348	TMED10	-1.56789	8.23132	150.383	1.42997e-34	1.44999e-33
Acinar	ENSG00000144867	SRPRB	-1.30291	5.91859	150.373	1.43672e-34	1.45595e-33
Acinar	ENSG00000152128	TMEM163	-1.4119	4.11282	150.356	1.44924e-34	1.46774e-33
Acinar	ENSG00000170608	FOXA3	-1.23975	4.68939	150.274	1.51045e-34	1.52881e-33
Acinar	ENSG00000176971	FIBIN	2.20081	1.92564	150.255	1.52486e-34	1.54245e-33
Acinar	ENSG00000124440	HIF3A	1.19727	4.80525	150.241	1.5359e-34	1.55268e-33
Acinar	ENSG00000175395	ZNF25	1.76833	2.25945	150.179	1.58404e-34	1.60037e-33
Acinar	ENSG00000169122	FAM110B	1.21628	3.41129	150.166	1.59436e-34	1.60982e-33
Acinar	ENSG00000177453	NIM1K	4.94855	0.197732	150.098	1.65053e-34	1.66552e-33
Acinar	ENSG00000104213	PDGFRL	-1.31248	2.83333	149.989	1.74366e-34	1.75844e-33
Acinar	ENSG00000262619	LINC00621	4.964	-0.175392	149.911	1.81309e-34	1.82735e-33
Acinar	ENSG00000152580	IGSF10	3.4511	1.17135	149.787	1.92977e-34	1.94377e-33
Acinar	ENSG00000053372	MRTO4	-0.948752	5.26021	149.627	2.09195e-34	2.10585e-33
Acinar	ENSG00000058668	ATP2B4	1.13381	4.50035	149.567	2.15541e-34	2.16843e-33
Acinar	ENSG00000065320	NTN1	2.57157	1.84217	149.539	2.18656e-34	2.19844e-33
Acinar	ENSG00000178531	CTXN1	3.09697	3.55117	149.488	2.24355e-34	2.25437e-33
Acinar	ENSG00000163568	AIM2	6.53948	-0.350417	149.392	2.35438e-34	2.36432e-33
Acinar	ENSG00000261664	TTC39A-AS1	2.33388	0.969604	149.206	2.5849e-34	2.59425e-33
Acinar	ENSG00000185681	MORN5	4.03821	-0.0873862	148.861	3.07599e-34	3.08524e-33
Acinar	ENSG00000126602	TRAP1	-0.820487	5.18782	148.686	3.35921e-34	3.36729e-33
Acinar	ENSG00000069431	ABCC9	2.92012	1.59716	148.664	3.39593e-34	3.40206e-33
Acinar	ENSG00000220205	VAMP2	0.985593	6.86444	148.58	3.54338e-34	3.54764e-33
Acinar	ENSG00000170419	VSTM2A	4.99771	0.106431	148.563	3.57389e-34	3.57603e-33
Acinar	ENSG00000115977	AAK1	1.24487	4.53347	148.496	3.6964e-34	3.6964e-33
Acinar	ENSG00000267042	CTD-3193K9.4	2.11974	2.22768	148.346	3.98499e-34	3.9826e-33
Acinar	ENSG00000117411	B4GALT2	-1.25486	4.08086	148.276	4.12779e-34	4.12165e-33
Acinar	ENSG00000181191	PJA1	0.999989	3.88548	148.276	4.12908e-34	4.12165e-33
Acinar	ENSG00000261455	LINC01003	1.01798	3.49568	148.174	4.3452e-34	4.33479e-33
Acinar	ENSG00000159176	CSRP1	-1.37589	6.03661	148.114	4.47991e-34	4.46651e-33
Acinar	ENSG00000135525	MAP7	-0.841155	5.61893	148.111	4.48597e-34	4.46987e-33
Acinar	ENSG00000235434	RP11-91K11.2	-3.3307	-0.213986	148.057	4.60901e-34	4.58973e-33
Acinar	ENSG00000063438	AHRR	4.18787	0.878043	147.867	5.07183e-34	5.0476e-33
Acinar	ENSG00000085433	WDR47	1.05837	2.61494	147.864	5.07912e-34	5.05182e-33
Acinar	ENSG00000050820	BCAR1	1.27699	4.16008	147.818	5.19921e-34	5.16819e-33
Acinar	ENSG00000074657	ZNF532	1.34726	3.49392	147.757	5.36031e-34	5.32515e-33
Acinar	ENSG00000129951	PLPPR3	4.51246	-0.275681	147.706	5.50039e-34	5.46106e-33
Acinar	ENSG00000171055	FEZ2	1.04185	4.68652	147.675	5.58656e-34	5.5433e-33
Acinar	ENSG00000101144	BMP7	-3.25097	4.60921	147.63	5.71525e-34	5.66762e-33
Acinar	ENSG00000101200	AVP	4.55689	-0.676418	147.623	5.73424e-34	5.68307e-33
Acinar	ENSG00000099282	TSPAN15	1.04478	2.70587	147.585	5.84671e-34	5.79109e-33
Acinar	ENSG00000124155	PIGT	-1.04615	5.68071	147.386	6.46059e-34	6.39533e-33
Acinar	ENSG00000124159	MATN4	-3.24743	3.5431	147.367	6.52227e-34	6.45256e-33
Acinar	ENSG00000185737	NRG3	-2.33636	1.44143	147.362	6.53872e-34	6.46499e-33
Acinar	ENSG00000120217	CD274	-2.73059	0.458493	147.216	7.03911e-34	6.95561e-33
Acinar	ENSG00000088538	DOCK3	3.31476	0.523712	147.176	7.18359e-34	7.09417e-33
Acinar	ENSG00000141068	KSR1	-1.23564	3.68157	147.133	7.33806e-34	7.24243e-33
Acinar	ENSG00000015475	BID	1.05688	3.99318	147.08	7.53707e-34	7.43443e-33
Acinar	ENSG00000162065	TBC1D24	1.23159	3.68079	147.052	7.64459e-34	7.53603e-33
Acinar	ENSG00000162460	TMEM82	-3.56816	-0.325771	146.999	7.85095e-34	7.73031e-33
Acinar	ENSG00000183098	GPC6	1.38507	4.0791	146.953	8.03677e-34	7.9086e-33
Acinar	ENSG00000205413	SAMD9	1.85158	1.97703	146.915	8.19214e-34	8.05673e-33
Acinar	ENSG00000128881	TTBK2	1.12543	3.26961	146.895	8.27495e-34	8.13337e-33
Acinar	ENSG00000147224	PRPS1	1.31823	4.23981	146.859	8.4228e-34	8.27381e-33
Acinar	ENSG00000189157	FAM47E	1.32352	2.94357	146.846	8.48143e-34	8.32649e-33
Acinar	ENSG00000227028	SLC8A1-AS1	5.2979	0.0166209	146.777	8.77849e-34	8.61306e-33
Acinar	ENSG00000196368	NUDT11	2.71428	1.39759	146.758	8.86241e-34	8.69028e-33
Acinar	ENSG00000168878	SFTPB	-4.91258	-0.630566	146.732	8.97956e-34	8.79997e-33
Acinar	ENSG00000225386	AC099754.1	-5.27417	-1.00207	146.701	9.12e-34	8.93235e-33
Acinar	ENSG00000088726	TMEM40	-3.76703	-0.432709	146.644	9.38713e-34	9.18858e-33
Acinar	ENSG00000164841	TMEM74	3.35805	-0.0158857	146.499	1.00999e-33	9.88044e-33
Acinar	ENSG00000137880	GCHFR	1.03263	4.98081	146.485	1.01702e-33	9.94339e-33
Acinar	ENSG00000170903	MSANTD4	1.1588	4.45542	146.058	1.26057e-33	1.23173e-32
Acinar	ENSG00000112539	C6orf118	5.48551	-0.00400954	145.955	1.32801e-33	1.29687e-32
Acinar	ENSG00000133065	SLC41A1	-1.43086	3.6881	145.924	1.3489e-33	1.31651e-32
Acinar	ENSG00000143126	CELSR2	1.42586	3.07716	145.914	1.35583e-33	1.32249e-32
Acinar	ENSG00000108684	ASIC2	4.87282	-0.223027	145.876	1.38206e-33	1.34729e-32
Acinar	ENSG00000205362	MT1A	-3.38158	1.45382	145.759	1.46534e-33	1.42764e-32
Acinar	ENSG00000164175	SLC45A2	4.89913	-0.376752	145.757	1.46716e-33	1.42857e-32
Acinar	ENSG00000126705	AHDC1	1.06893	3.49691	145.626	1.5671e-33	1.52499e-32
Acinar	ENSG00000137960	GIPC2	-2.3857	4.83538	145.572	1.61019e-33	1.56601e-32
Acinar	ENSG00000166311	SMPD1	0.923169	4.14903	145.568	1.61327e-33	1.56809e-32
Acinar	ENSG00000130703	OSBPL2	-0.882475	4.62799	145.365	1.78754e-33	1.73646e-32
Acinar	ENSG00000196951	SCOC-AS1	3.871	0.583906	145.359	1.79266e-33	1.74043e-32
Acinar	ENSG00000177707	PVRL3	1.46867	4.12717	145.189	1.95235e-33	1.89436e-32
Acinar	ENSG00000196503	ARL9	4.54171	0.206938	145.168	1.97373e-33	1.91399e-32
Acinar	ENSG00000156136	DCK	1.47573	3.54378	145.155	1.98627e-33	1.92503e-32
Acinar	ENSG00000108176	DNAJC12	1.59523	5.26721	145.017	2.1292e-33	2.06236e-32
Acinar	ENSG00000181904	C5orf24	0.855528	5.49761	144.972	2.17833e-33	2.10872e-32
Acinar	ENSG00000166794	PPIB	-1.37497	9.66279	144.884	2.27631e-33	2.20228e-32
Acinar	ENSG00000058335	RASGRF1	4.27127	0.375883	144.816	2.356e-33	2.27806e-32
Acinar	ENSG00000174132	FAM174A	0.930731	4.78831	144.741	2.44646e-33	2.36416e-32
Acinar	ENSG00000139971	C14orf37	1.27637	2.56236	144.721	2.47135e-33	2.38682e-32
Acinar	ENSG00000163754	GYG1	-0.929325	4.56268	144.711	2.48408e-33	2.39773e-32
Acinar	ENSG00000177669	MBOAT4	4.57372	-0.11286	144.571	2.66598e-33	2.57182e-32
Acinar	ENSG00000187994	RINL	1.64938	3.1568	144.536	2.71256e-33	2.61523e-32
Acinar	ENSG00000040933	INPP4A	1.24646	3.00086	144.345	2.98664e-33	2.87781e-32
Acinar	ENSG00000213123	TCTEX1D2	0.888983	5.14767	144.054	3.45805e-33	3.33012e-32
Acinar	ENSG00000265681	RPL17	-1.14446	8.32368	144.033	3.49519e-33	3.36394e-32
Acinar	ENSG00000255406	RP11-713P17.5	6.09736	-0.19004	143.815	3.90015e-33	3.75153e-32
Acinar	ENSG00000212694	LINC01089	1.4161	2.84375	143.805	3.92003e-33	3.76848e-32
Acinar	ENSG00000105699	LSR	-1.27629	5.22907	143.757	4.01482e-33	3.85737e-32
Acinar	ENSG00000106789	CORO2A	2.89629	0.701457	143.717	4.09783e-33	3.93486e-32
Acinar	ENSG00000141431	ASXL3	1.14314	3.89334	143.604	4.33607e-33	4.16123e-32
Acinar	ENSG00000085117	CD82	1.25953	3.72626	143.497	4.57612e-33	4.38907e-32
Acinar	ENSG00000235314	LINC00957	2.05972	0.745949	143.486	4.60292e-33	4.41223e-32
Acinar	ENSG00000073067	CYP2W1	2.37876	1.59675	143.46	4.66338e-33	4.46762e-32
Acinar	ENSG00000167972	ABCA3	2.52614	2.05446	143.452	4.68133e-33	4.48224e-32
Acinar	ENSG00000132432	SEC61G	-1.01402	8.20318	143.315	5.01594e-33	4.79986e-32
Acinar	ENSG00000143753	DEGS1	1.05603	4.08504	143.237	5.21573e-33	4.98818e-32
Acinar	ENSG00000116032	GRIN3B	5.55432	-0.860168	143.156	5.43293e-33	5.19292e-32
Acinar	ENSG00000180767	CHST13	-2.78047	1.61225	143.129	5.50819e-33	5.26184e-32
Acinar	ENSG00000112320	SOBP	1.6712	4.20126	143.018	5.82383e-33	5.56017e-32
Acinar	ENSG00000158106	RHPN1	1.20136	2.93848	142.972	5.96256e-33	5.68936e-32
Acinar	ENSG00000272009	RP1-313I6.12	-1.64061	3.96452	142.968	5.97412e-33	5.69713e-32
Acinar	ENSG00000100170	SLC5A1	4.75751	0.0659826	142.96	5.99818e-33	5.7168e-32
Acinar	ENSG00000156973	PDE6D	1.22622	3.22013	142.911	6.14826e-33	5.85649e-32
Acinar	ENSG00000151952	TMEM132D	5.36015	-0.151393	142.894	6.19998e-33	5.90238e-32
Acinar	ENSG00000167711	SERPINF2	-1.91172	4.60278	142.879	6.24623e-33	5.94302e-32
Acinar	ENSG00000106341	PPP1R17	5.35409	0.109764	142.859	6.30898e-33	5.99929e-32
Acinar	ENSG00000241163	LINC00877	5.8655	-0.251136	142.851	6.33546e-33	6.02104e-32
Acinar	ENSG00000152822	GRM1	4.48803	-0.261888	142.779	6.57018e-33	6.24054e-32
Acinar	ENSG00000173226	IQCB1	-0.808621	4.22847	142.752	6.65812e-33	6.32047e-32
Acinar	ENSG00000101405	OXT	4.16507	-0.287025	142.7	6.83722e-33	6.48679e-32
Acinar	ENSG00000154553	PDLIM3	-1.15034	3.90453	142.627	7.0933e-33	6.72592e-32
Acinar	ENSG00000185386	MAPK11	3.12803	0.627675	142.489	7.60093e-33	7.20316e-32
Acinar	ENSG00000132386	SERPINF1	-3.81222	6.11487	142.318	8.28475e-33	7.84672e-32
Acinar	ENSG00000039537	C6	1.43644	2.75422	142.156	8.98882e-33	8.50874e-32
Acinar	ENSG00000175110	MRPS22	-1.05111	4.91094	142.113	9.1849e-33	8.68941e-32
Acinar	ENSG00000100266	PACSIN2	-1.69408	5.55376	142.034	9.56053e-33	9.03964e-32
Acinar	ENSG00000160179	ABCG1	1.90307	2.65622	141.998	9.73411e-33	9.19854e-32
Acinar	ENSG00000008394	MGST1	-3.47306	6.49925	141.948	9.98401e-33	9.42935e-32
Acinar	ENSG00000257698	RP11-620J15.3	0.885145	4.46215	141.871	1.03768e-32	9.79474e-32
Acinar	ENSG00000182287	AP1S2	-0.958746	4.08115	141.83	1.05917e-32	9.99191e-32
Acinar	ENSG00000163394	CCKAR	-3.57598	3.85932	141.797	1.07716e-32	1.01559e-31
Acinar	ENSG00000065154	OAT	1.36469	3.98143	141.57	1.20734e-32	1.13768e-31
Acinar	ENSG00000175182	FAM131A	1.23995	3.10661	141.384	1.32604e-32	1.24883e-31
Acinar	ENSG00000114268	PFKFB4	-1.18689	3.33241	141.327	1.36482e-32	1.28462e-31
Acinar	ENSG00000203772	SPRN	5.03869	-0.238353	141.172	1.47571e-32	1.38822e-31
Acinar	ENSG00000175048	ZDHHC14	1.32559	4.13871	141.153	1.48934e-32	1.40025e-31
Acinar	ENSG00000025772	TOMM34	0.956082	3.75779	141.139	1.50027e-32	1.40973e-31
Acinar	ENSG00000109814	UGDH	-1.87788	7.24029	141.078	1.54701e-32	1.45283e-31
Acinar	ENSG00000245750	DRAIC	1.84516	2.69554	141.063	1.55897e-32	1.46324e-31
Acinar	ENSG00000181585	TMIE	4.38409	-0.192833	141.032	1.58312e-32	1.48506e-31
Acinar	ENSG00000116711	PLA2G4A	2.73691	1.09784	140.976	1.62812e-32	1.52642e-31
Acinar	ENSG00000274444	RP11-128A17.2	4.61332	0.221165	140.955	1.64584e-32	1.54195e-31
Acinar	ENSG00000169925	BRD3	0.734464	5.56249	140.954	1.64653e-32	1.54195e-31
Acinar	ENSG00000231652	RP11-553A21.3	-2.64383	-0.201192	140.72	1.85289e-32	1.73422e-31
Acinar	ENSG00000167523	SPATA33	1.10728	3.92635	140.645	1.92394e-32	1.79971e-31
Acinar	ENSG00000160293	VAV2	-0.998473	3.76226	140.574	1.99346e-32	1.86369e-31
Acinar	ENSG00000088881	EBF4	1.39968	1.92404	140.429	2.1451e-32	2.00434e-31
Acinar	ENSG00000196497	IPO4	-1.07129	2.95878	140.383	2.19532e-32	2.05011e-31
Acinar	ENSG00000189221	MAOA	-1.03591	5.16703	140.381	2.19694e-32	2.05048e-31
Acinar	ENSG00000180176	TH	4.98632	-0.139903	140.344	2.23885e-32	2.08842e-31
Acinar	ENSG00000105063	PPP6R1	0.866917	3.89206	140.222	2.38069e-32	2.21949e-31
Acinar	ENSG00000168894	RNF181	-1.60253	6.56999	140.13	2.49397e-32	2.3238e-31
Acinar	ENSG00000133069	TMCC2	2.79939	1.63818	140.09	2.54417e-32	2.36925e-31
Acinar	ENSG00000103056	SMPD3	3.40263	0.552546	140.085	2.55093e-32	2.37422e-31
Acinar	ENSG00000147872	PLIN2	-1.43898	5.03746	140.02	2.63473e-32	2.45085e-31
Acinar	ENSG00000135124	P2RX4	-1.26523	4.55035	139.983	2.68498e-32	2.49619e-31
Acinar	ENSG00000102580	DNAJC3	-0.995857	6.36861	139.873	2.83713e-32	2.63617e-31
Acinar	ENSG00000100665	SERPINA4	-2.82634	6.35559	139.76	3.00465e-32	2.79027e-31
Acinar	ENSG00000138738	PRDM5	-1.08421	3.082	139.716	3.0716e-32	2.85086e-31
Acinar	ENSG00000183876	ARSI	4.6713	-0.661186	139.558	3.32517e-32	3.08277e-31
Acinar	ENSG00000136367	ZFHX2	1.70074	2.23132	139.497	3.42909e-32	3.17735e-31
Acinar	ENSG00000089006	SNX5	-0.80866	5.49833	139.466	3.48287e-32	3.22538e-31
Acinar	ENSG00000133812	SBF2	1.01791	3.86962	139.447	3.5168e-32	3.255e-31
Acinar	ENSG00000053108	FSTL4	4.26353	0.296741	139.418	3.5683e-32	3.30082e-31
Acinar	ENSG00000175262	C1orf127	2.99994	2.32983	139.333	3.72448e-32	3.44339e-31
Acinar	ENSG00000179178	TMEM125	-1.4758	5.35306	139.26	3.86327e-32	3.56972e-31
Acinar	ENSG00000163083	INHBB	4.81285	-0.303626	139.177	4.02805e-32	3.71992e-31
Acinar	ENSG00000105219	CNTD2	4.18006	-0.262924	139.171	4.04068e-32	3.72952e-31
Acinar	ENSG00000090621	PABPC4	-1.932	7.10649	139.131	4.12272e-32	3.80312e-31
Acinar	ENSG00000115363	EVA1A	-2.21316	4.27739	138.98	4.4487e-32	4.10157e-31
Acinar	ENSG00000088298	EDEM2	-1.75664	4.91191	138.922	4.58196e-32	4.2221e-31
Acinar	ENSG00000248475	RP11-479O16.1	5.59341	-0.407666	138.765	4.9568e-32	4.56497e-31
Acinar	ENSG00000155974	GRIP1	1.83129	1.40951	138.66	5.22611e-32	4.81033e-31
Acinar	ENSG00000164754	RAD21	0.940548	6.62993	138.62	5.3346e-32	4.90748e-31
Acinar	ENSG00000135298	ADGRB3	3.18744	0.367641	138.607	5.36818e-32	4.93565e-31
Acinar	ENSG00000166949	SMAD3	-2.14103	4.0133	138.528	5.58722e-32	5.13421e-31
Acinar	ENSG00000141934	PLPP2	1.96426	3.22652	138.502	5.6588e-32	5.19711e-31
Acinar	ENSG00000162236	STX5	-0.943962	4.8701	138.29	6.29784e-32	5.78083e-31
Acinar	ENSG00000156049	GNA14	-3.16027	-0.212643	138.064	7.05738e-32	6.47445e-31
Acinar	ENSG00000176531	PHLDB3	1.28469	3.25486	137.897	7.67503e-32	7.0372e-31
Acinar	ENSG00000137642	SORL1	2.21178	3.68584	137.869	7.78574e-32	7.13479e-31
Acinar	ENSG00000161091	MFSD12	0.996068	2.99021	137.853	7.84819e-32	7.18806e-31
Acinar	ENSG00000245848	CEBPA	-2.07625	1.42534	137.806	8.03754e-32	7.35744e-31
Acinar	ENSG00000116815	CD58	-2.06988	3.48935	137.739	8.31124e-32	7.6038e-31
Acinar	ENSG00000004866	ST7	-1.15961	3.57678	137.733	8.33735e-32	7.6235e-31
Acinar	ENSG00000139438	FAM222A	1.70839	3.48736	137.671	8.59941e-32	7.85881e-31
Acinar	ENSG00000141052	MYOCD	4.14955	-0.0188973	137.633	8.76515e-32	8.00589e-31
Acinar	ENSG00000160282	FTCD	5.19217	2.1682	137.624	8.80866e-32	8.04122e-31
Acinar	ENSG00000095370	SH2D3C	3.02075	2.28522	137.582	8.99735e-32	8.20898e-31
Acinar	ENSG00000070031	SCT	4.14827	0.831397	137.568	9.05855e-32	8.26028e-31
Acinar	ENSG00000163412	EIF4E3	1.171	2.74622	137.527	9.24771e-32	8.42817e-31
Acinar	ENSG00000078098	FAP	3.8914	1.1736	137.441	9.65654e-32	8.79595e-31
Acinar	ENSG00000227508	LINC01624	-3.91138	3.24385	137.417	9.77401e-32	8.89809e-31
Acinar	ENSG00000174951	FUT1	-1.51099	2.49261	137.364	1.00375e-31	9.13298e-31
Acinar	ENSG00000075240	GRAMD4	-0.946615	2.77492	137.356	1.00801e-31	9.16675e-31
Acinar	ENSG00000057593	F7	3.48138	0.290258	137.346	1.01323e-31	9.20915e-31
Acinar	ENSG00000167772	ANGPTL4	-3.51043	5.30923	137.319	1.02691e-31	9.32842e-31
Acinar	ENSG00000204071	TCEAL6	4.70105	0.0895109	137.292	1.04081e-31	9.44955e-31
Acinar	ENSG00000128335	APOL2	1.0562	2.98237	137.287	1.04358e-31	9.46954e-31
Acinar	ENSG00000158528	PPP1R9A	0.940169	5.69855	137.263	1.05643e-31	9.58091e-31
Acinar	ENSG00000171490	RSL1D1	-0.84517	7.14638	137.261	1.05738e-31	9.58432e-31
Acinar	ENSG00000105829	BET1	-1.06894	5.2737	137.257	1.05935e-31	9.59697e-31
Acinar	ENSG00000164823	OSGIN2	1.02565	2.79859	137.206	1.08717e-31	9.84366e-31
Acinar	ENSG00000158023	WDR66	1.43634	2.29243	137.133	1.12753e-31	1.02035e-30
Acinar	ENSG00000126106	TMEM53	1.18486	4.30199	137.124	1.13278e-31	1.02454e-30
Acinar	ENSG00000277972	CISD3	-0.957041	5.33974	136.981	1.21765e-31	1.1007e-30
Acinar	ENSG00000215252	GOLGA8B	-1.62511	5.50176	136.871	1.28655e-31	1.16236e-30
Acinar	ENSG00000073536	NLE1	-1.17524	3.02718	136.845	1.30356e-31	1.17709e-30
Acinar	ENSG00000141232	TOB1	-1.18639	5.84858	136.608	1.46937e-31	1.32609e-30
Acinar	ENSG00000137486	ARRB1	-2.01928	2.90098	136.572	1.49612e-31	1.3495e-30
Acinar	ENSG00000138311	ZNF365	5.47343	-0.214587	136.567	1.49953e-31	1.35185e-30
Acinar	ENSG00000133835	HSD17B4	-1.06502	5.60201	136.529	1.52865e-31	1.37736e-30
Acinar	ENSG00000149100	EIF3M	-0.859553	7.16923	136.49	1.55876e-31	1.40372e-30
Acinar	ENSG00000185736	ADARB2	3.6389	0.23643	136.448	1.592e-31	1.43288e-30
Acinar	ENSG00000187954	CYHR1	-0.993963	5.89827	136.43	1.60663e-31	1.44527e-30
Acinar	ENSG00000164056	SPRY1	-1.41023	3.74269	136.292	1.72279e-31	1.54893e-30
Acinar	ENSG00000160781	PAQR6	2.54904	0.91995	136.267	1.74435e-31	1.56746e-30
Acinar	ENSG00000155096	AZIN1	-0.652636	6.00764	136.216	1.78941e-31	1.6071e-30
Acinar	ENSG00000147649	MTDH	-0.842645	6.86225	136.16	1.84058e-31	1.65216e-30
Acinar	ENSG00000074695	LMAN1	-0.937968	6.93054	136.149	1.85082e-31	1.66046e-30
Acinar	ENSG00000177875	CCDC184	4.03074	0.465933	136.139	1.86082e-31	1.66853e-30
Acinar	ENSG00000198420	TCAF1	1.01553	5.76766	136.066	1.92989e-31	1.72953e-30
Acinar	ENSG00000164181	ELOVL7	-1.70593	3.00882	136.036	1.95903e-31	1.7547e-30
Acinar	ENSG00000128016	ZFP36	-1.77188	6.20836	135.981	2.01426e-31	1.8032e-30
Acinar	ENSG00000123104	ITPR2	-1.75925	5.7	135.948	2.0485e-31	1.83287e-30
Acinar	ENSG00000186231	KLHL32	2.97576	0.939458	135.862	2.13887e-31	1.91269e-30
Acinar	ENSG00000058091	CDK14	0.938193	5.22798	135.786	2.22238e-31	1.98632e-30
Acinar	ENSG00000120498	TEX11	-3.71292	3.25275	135.766	2.24483e-31	2.0053e-30
Acinar	ENSG00000141540	TTYH2	-1.89488	1.35613	135.727	2.28911e-31	2.04376e-30
Acinar	ENSG00000030582	GRN	-1.13741	6.79143	135.666	2.36035e-31	2.10624e-30
Acinar	ENSG00000076555	ACACB	-1.04797	3.49323	135.593	2.44894e-31	2.18412e-30
Acinar	ENSG00000213918	DNASE1	-2.18155	5.47106	135.585	2.45884e-31	2.19177e-30
Acinar	ENSG00000140519	RHCG	-4.30274	-0.876697	135.349	2.76979e-31	2.46763e-30
Acinar	ENSG00000165983	PTER	-1.03003	3.21022	135.304	2.83312e-31	2.5227e-30
Acinar	ENSG00000151090	THRB	-2.1004	1.82182	135.27	2.88224e-31	2.56507e-30
Acinar	ENSG00000266402	SNHG25	-0.992427	5.20465	135.24	2.92508e-31	2.60181e-30
Acinar	ENSG00000237412	PRSS56	5.30573	-1.10551	135.136	3.08306e-31	2.74086e-30
Acinar	ENSG00000198818	SFT2D1	-0.99583	5.39668	134.986	3.32568e-31	2.95498e-30
Acinar	ENSG00000198721	ECI2	-1.45948	6.8857	134.96	3.36862e-31	2.99153e-30
Acinar	ENSG00000130035	GALNT8	3.46592	0.469618	134.932	3.41657e-31	3.0325e-30
Acinar	ENSG00000168060	NAALADL1	2.27463	1.34738	134.917	3.44289e-31	3.05423e-30
Acinar	ENSG00000092036	HAUS4	-1.60954	2.80921	134.854	3.55322e-31	3.15043e-30
Acinar	ENSG00000143771	CNIH4	-0.796984	5.79305	134.839	3.58057e-31	3.173e-30
Acinar	ENSG00000123999	INHA	-2.31761	2.8172	134.788	3.67444e-31	3.25445e-30
Acinar	ENSG00000171310	CHST11	-2.31504	2.54148	134.78	3.68913e-31	3.26572e-30
Acinar	ENSG00000176871	WSB2	0.912824	3.90111	134.747	3.74947e-31	3.31738e-30
Acinar	ENSG00000111328	CDK2AP1	1.20508	4.34015	134.563	4.11375e-31	3.63774e-30
Acinar	ENSG00000120708	TGFBI	-2.53691	1.32945	134.476	4.29847e-31	3.79908e-30
Acinar	ENSG00000261411	RP11-268G13.1	3.20549	0.405486	134.395	4.47775e-31	3.95543e-30
Acinar	ENSG00000104177	MYEF2	0.884503	5.32493	134.362	4.55178e-31	4.01868e-30
Acinar	ENSG00000180801	ARSJ	3.00212	0.83399	134.347	4.5875e-31	4.04808e-30
Acinar	ENSG00000134369	NAV1	1.09253	4.7503	134.206	4.92593e-31	4.34441e-30
Acinar	ENSG00000272894	RP5-1159O4.1	-2.92772	4.85795	134.189	4.9678e-31	4.37903e-30
Acinar	ENSG00000196405	EVL	0.858471	5.04039	134.178	4.99389e-31	4.39969e-30
Acinar	ENSG00000102878	HSF4	2.70477	0.82005	134.144	5.08116e-31	4.47421e-30
Acinar	ENSG00000161671	EMC10	1.18928	6.91865	134.125	5.12947e-31	4.51436e-30
Acinar	ENSG00000114353	GNAI2	0.992775	6.64099	134.058	5.30687e-31	4.66802e-30
Acinar	ENSG00000025434	NR1H3	-1.55788	2.73403	134.031	5.37898e-31	4.72896e-30
Acinar	ENSG00000159784	FAM131B	5.27217	-0.0811376	133.992	5.48567e-31	4.82021e-30
Acinar	ENSG00000169758	TMEM266	-2.89321	1.58181	133.895	5.76166e-31	5.06006e-30
Acinar	ENSG00000138175	ARL3	0.807329	6.46576	133.863	5.85451e-31	5.13889e-30
Acinar	ENSG00000145287	PLAC8	3.6948	2.74678	133.862	5.85809e-31	5.13932e-30
Acinar	ENSG00000099957	P2RX6	4.61057	-0.432161	133.845	5.9076e-31	5.18003e-30
Acinar	ENSG00000115963	RND3	1.43647	3.66482	133.834	5.93894e-31	5.20477e-30
Acinar	ENSG00000118785	SPP1	1.79337	3.49146	133.8	6.0418e-31	5.29213e-30
Acinar	ENSG00000101888	NXT2	-1.68545	3.00102	133.76	6.16494e-31	5.39716e-30
Acinar	ENSG00000186470	BTN3A2	-1.21234	2.50399	133.752	6.18986e-31	5.41612e-30
Acinar	ENSG00000160326	SLC2A6	2.65769	2.08677	133.748	6.20374e-31	5.42542e-30
Acinar	ENSG00000088926	F11	-2.29682	1.31558	133.727	6.26818e-31	5.4789e-30
Acinar	ENSG00000145022	TCTA	1.00683	4.24502	133.567	6.79451e-31	5.93273e-30
Acinar	ENSG00000158164	TMSB15A	1.58415	3.57163	133.452	7.19982e-31	6.28334e-30
Acinar	ENSG00000249992	TMEM158	2.84113	0.744176	133.424	7.30098e-31	6.36829e-30
Acinar	ENSG00000132669	RIN2	1.81248	3.7325	133.409	7.3576e-31	6.41432e-30
Acinar	ENSG00000117151	CTBS	-1.1404	4.56586	133.403	7.38169e-31	6.43195e-30
Acinar	ENSG00000126749	EMG1	-0.733457	4.94213	133.371	7.50005e-31	6.53167e-30
Acinar	ENSG00000092758	COL9A3	2.24751	3.32011	133.308	7.74011e-31	6.73722e-30
Acinar	ENSG00000168010	ATG16L2	1.23723	2.73874	133.182	8.24717e-31	7.17482e-30
Acinar	ENSG00000188636	LDOC1L	0.982246	3.27517	133.092	8.63208e-31	7.50576e-30
Acinar	ENSG00000099840	IZUMO4	-2.05773	3.43241	133.041	8.85513e-31	7.6957e-30
Acinar	ENSG00000140057	AK7	1.22674	2.12966	133.004	9.02502e-31	7.83925e-30
Acinar	ENSG00000119912	IDE	-1.29751	3.55102	132.882	9.5931e-31	8.32835e-30
Acinar	ENSG00000257913	RP11-386G11.5	1.92038	1.97319	132.605	1.10338e-30	9.57416e-30
Acinar	ENSG00000135097	MSI1	1.04589	3.64977	132.452	1.1914e-30	1.03325e-29
Acinar	ENSG00000215375	MYL5	-1.05473	3.119	132.424	1.20853e-30	1.04756e-29
Acinar	ENSG00000170412	GPRC5C	-1.18206	5.70122	132.341	1.26021e-30	1.09179e-29
Acinar	ENSG00000260420	LA16c-444G7.2	4.51894	0.109488	132.298	1.28742e-30	1.1142e-29
Acinar	ENSG00000205542	TMSB4X	1.2196	10.3461	132.299	1.28685e-30	1.1142e-29
Acinar	ENSG00000177685	CRACR2B	-1.34045	5.33105	132.221	1.33874e-30	1.15802e-29
Acinar	ENSG00000141668	CBLN2	6.35709	-0.522069	132.184	1.364e-30	1.17926e-29
Acinar	ENSG00000114631	PODXL2	2.31307	4.00587	132.112	1.41442e-30	1.22221e-29
Acinar	ENSG00000174672	BRSK2	-1.41906	4.72899	132.071	1.44397e-30	1.2471e-29
Acinar	ENSG00000081923	ATP8B1	-1.74925	3.92465	132.029	1.47422e-30	1.27256e-29
Acinar	ENSG00000005022	SLC25A5	-1.23767	8.59262	132.028	1.47503e-30	1.2726e-29
Acinar	ENSG00000161270	NPHS1	-1.30576	3.71351	132.021	1.48039e-30	1.27656e-29
Acinar	ENSG00000168237	GLYCTK	-0.790033	3.26154	131.999	1.49673e-30	1.28999e-29
Acinar	ENSG00000180304	OAZ2	0.849947	6.18876	131.991	1.50298e-30	1.29471e-29
Acinar	ENSG00000174485	DENND4A	-0.96693	4.65502	131.892	1.57955e-30	1.35996e-29
Acinar	ENSG00000111647	UHRF1BP1L	1.46685	3.18672	131.831	1.62885e-30	1.40168e-29
Acinar	ENSG00000214575	CPEB1	4.32006	-0.232757	131.821	1.63765e-30	1.40854e-29
Acinar	ENSG00000197077	KIAA1671	-1.39995	4.02363	131.729	1.71505e-30	1.47434e-29
Acinar	ENSG00000105223	PLD3	0.975874	7.71776	131.694	1.74515e-30	1.49944e-29
Acinar	ENSG00000109686	SH3D19	-1.24604	3.4364	131.581	1.84733e-30	1.58642e-29
Acinar	ENSG00000124172	ATP5E	1.16398	9.73817	131.511	1.91386e-30	1.6427e-29
Acinar	ENSG00000176209	SMIM19	-0.871794	5.18503	131.43	1.99423e-30	1.71081e-29
Acinar	ENSG00000170396	ZNF804A	4.43861	0.561744	131.38	2.04483e-30	1.75331e-29
Acinar	ENSG00000231728	LL0XNC01-116E7.2	6.13752	-0.476441	131.323	2.10372e-30	1.80288e-29
Acinar	ENSG00000119523	ALG2	-0.823362	5.19546	131.295	2.13456e-30	1.82837e-29
Acinar	ENSG00000182013	PNMAL1	1.26124	3.67287	131.287	2.14322e-30	1.83472e-29
Acinar	ENSG00000162873	KLHDC8A	5.0225	-0.276913	131.286	2.14417e-30	1.83472e-29
Acinar	ENSG00000139116	KIF21A	0.983257	5.6057	131.132	2.31715e-30	1.98171e-29
Acinar	ENSG00000112319	EYA4	4.56843	-0.380001	131.106	2.34731e-30	2.00648e-29
Acinar	ENSG00000106012	IQCE	0.90139	3.73046	131.057	2.40648e-30	2.05577e-29
Acinar	ENSG00000162882	HAAO	-1.21707	3.09611	131.056	2.40745e-30	2.05577e-29
Acinar	ENSG00000092969	TGFB2	-2.78723	4.74449	131.053	2.41061e-30	2.05741e-29
Acinar	ENSG00000131016	AKAP12	2.05104	3.57401	131.031	2.43724e-30	2.07908e-29
Acinar	ENSG00000107242	PIP5K1B	-2.42676	2.86368	130.996	2.48068e-30	2.11506e-29
Acinar	ENSG00000085563	ABCB1	4.28594	0.1308	130.944	2.54635e-30	2.16994e-29
Acinar	ENSG00000102984	ZNF821	1.32657	3.69235	130.921	2.57688e-30	2.19483e-29
Acinar	ENSG00000168282	MGAT2	-1.19179	4.17282	130.901	2.603e-30	2.21594e-29
Acinar	ENSG00000101310	SEC23B	-0.770001	4.72132	130.896	2.60859e-30	2.21957e-29
Acinar	ENSG00000100364	KIAA0930	-1.14017	3.08325	130.865	2.65094e-30	2.25445e-29
Acinar	ENSG00000237560	LINC01497	6.91494	-0.770799	130.753	2.80397e-30	2.38338e-29
Acinar	ENSG00000140650	PMM2	-0.859894	3.95848	130.749	2.81006e-30	2.38733e-29
Acinar	ENSG00000167434	CA4	2.2353	2.98473	130.739	2.82372e-30	2.39771e-29
Acinar	ENSG00000122641	INHBA	3.36573	0.420744	130.596	3.03457e-30	2.57544e-29
Acinar	ENSG00000127526	SLC35E1	-0.800607	4.37834	130.529	3.13902e-30	2.66273e-29
Acinar	ENSG00000136104	RNASEH2B	-1.22249	4.94844	130.482	3.21497e-30	2.72577e-29
Acinar	ENSG00000008277	ADAM22	1.80447	2.52187	130.355	3.42732e-30	2.90433e-29
Acinar	ENSG00000136828	RALGPS1	1.0958	3.62532	130.3	3.52316e-30	2.98403e-29
Acinar	ENSG00000165171	WBSCR27	-0.87119	3.03997	130.232	3.64504e-30	3.08569e-29
Acinar	ENSG00000074590	NUAK1	1.6987	1.71555	130.14	3.81963e-30	3.23184e-29
Acinar	ENSG00000167526	RPL13	-1.24447	12.2422	130.123	3.85202e-30	3.25759e-29
Acinar	ENSG00000100290	BIK	1.96502	2.09406	130.102	3.89177e-30	3.28954e-29
Acinar	ENSG00000134107	BHLHE40	-1.55329	1.99162	130.061	3.97402e-30	3.35737e-29
Acinar	ENSG00000081985	IL12RB2	-3.41806	-0.182005	130.031	4.03443e-30	3.40667e-29
Acinar	ENSG00000135519	KCNH3	-1.68786	3.18657	130.02	4.05603e-30	3.42318e-29
Acinar	ENSG00000055813	CCDC85A	4.43648	-0.374368	129.943	4.2168e-30	3.55705e-29
Acinar	ENSG00000130254	SAFB2	-0.730428	5.92395	129.815	4.498e-30	3.79235e-29
Acinar	ENSG00000141519	CCDC40	1.50924	2.05098	129.589	5.04096e-30	4.24797e-29
Acinar	ENSG00000138604	GLCE	0.993086	2.94532	129.572	5.08316e-30	4.28064e-29
Acinar	ENSG00000272619	RP11-563K23.1	4.41269	-0.0125492	129.572	5.08486e-30	4.28064e-29
Acinar	ENSG00000163902	RPN1	-1.23512	6.05372	129.531	5.19018e-30	4.36709e-29
Acinar	ENSG00000114646	CSPG5	-1.59366	1.88577	129.514	5.23445e-30	4.40212e-29
Acinar	ENSG00000146376	ARHGAP18	-1.22772	6.14346	129.485	5.31114e-30	4.46436e-29
Acinar	ENSG00000180773	SLC36A4	1.16259	4.36349	129.482	5.31859e-30	4.46836e-29
Acinar	ENSG00000150054	MPP7	-1.25752	3.22791	129.31	5.80265e-30	4.87259e-29
Acinar	ENSG00000145864	GABRB2	1.32972	3.43237	129.278	5.8959e-30	4.9484e-29
Acinar	ENSG00000137699	TRIM29	4.77678	0.0212844	129.174	6.21177e-30	5.21088e-29
Acinar	ENSG00000120054	CPN1	-2.02934	2.05295	129.168	6.23121e-30	5.22455e-29
Acinar	ENSG00000155970	MICU3	1.12362	3.45089	129.091	6.4787e-30	5.42933e-29
Acinar	ENSG00000153551	CMTM7	1.34336	3.05165	129.05	6.61422e-30	5.54012e-29
Acinar	ENSG00000115457	IGFBP2	-2.89694	7.76679	128.974	6.87235e-30	5.75344e-29
Acinar	ENSG00000187801	ZFP69B	1.58476	1.55876	128.867	7.25353e-30	6.06951e-29
Acinar	ENSG00000225350	FREM2-AS1	-4.6438	5.09982	128.709	7.85356e-30	6.56829e-29
Acinar	ENSG00000096093	EFHC1	1.03996	4.9374	128.692	7.91895e-30	6.61965e-29
Acinar	ENSG00000127445	PIN1	0.83412	6.4184	128.602	8.28893e-30	6.92546e-29
Acinar	ENSG00000018189	RUFY3	1.31703	5.11836	128.581	8.37769e-30	6.9961e-29
Acinar	ENSG00000146013	GFRA3	-2.11503	5.54932	128.543	8.53686e-30	7.12545e-29
Acinar	ENSG00000228126	FALEC	3.0235	0.910937	128.514	8.66389e-30	7.22786e-29
Acinar	ENSG00000254772	EEF1G	-0.868215	4.28348	128.467	8.87096e-30	7.39691e-29
Acinar	ENSG00000158516	CPA2	-4.15034	13.1064	128.454	8.92849e-30	7.44115e-29
Acinar	ENSG00000161533	ACOX1	-0.993421	4.6793	128.415	9.10767e-30	7.58669e-29
Acinar	ENSG00000277511	CTD-2095E4.5	3.76844	0.402626	128.405	9.15086e-30	7.61886e-29
Acinar	ENSG00000228623	ZNF883	1.2681	3.601	128.311	9.59589e-30	7.98539e-29
Acinar	ENSG00000081320	STK17B	-1.80232	2.91124	128.259	9.85288e-30	8.19516e-29
Acinar	ENSG00000106018	VIPR2	-3.67654	1.95392	128.175	1.02753e-29	8.54222e-29
[truncated: 69,323 more rows]

## Sheet: Sheet2
Sheet2: Differentially expressed TFs of each cell cluster in the human integrated scRNA-seq datasets
Cluster.Name	EID_human	gene_name	logFC	logCPM	LR	PValue	padj
Acinar	ENSG00000204103	MAFB	5.29604	7.27415	1449.55	0	0
Acinar	ENSG00000147488	ST18	5.08611	4.26825	1322.36	1.56598e-289	8.69639e-287
Acinar	ENSG00000182759	MAFA	5.1955	4.52588	1255.97	4.18596e-275	2.05112e-272
Acinar	ENSG00000185002	RFX6	4.80981	4.44672	1226.81	9.0746e-269	3.9785e-266
Acinar	ENSG00000007372	PAX6	6.11761	6.79082	1083.81	1.08957e-237	3.36154e-235
Acinar	ENSG00000004848	ARX	6.38464	4.12094	1054.22	2.94097e-231	8.16609e-229
Acinar	ENSG00000016082	ISL1	6.28775	6.90088	1008.11	3.10639e-221	7.50035e-219
Acinar	ENSG00000173404	INSM1	6.09248	5.84843	981.76	1.65589e-215	3.77905e-213
Acinar	ENSG00000170561	IRX2	5.97979	4.63474	973.132	1.24327e-213	2.72539e-211
Acinar	ENSG00000162992	NEUROD1	6.19619	7.17411	941.639	8.7143e-207	1.79235e-204
Acinar	ENSG00000006468	ETV1	4.83386	3.52668	855.123	5.59665e-188	9.14119e-186
Acinar	ENSG00000276644	DACH1	4.71714	4.23741	827.499	5.6681e-182	8.66335e-180
Acinar	ENSG00000163497	FEV	5.987	3.64439	814.307	4.18214e-179	6.00642e-177
Acinar	ENSG00000126733	DACH2	5.21376	2.35669	692.32	1.39893e-152	1.36294e-150
Acinar	ENSG00000125820	NKX2-2	4.03496	4.96814	653.395	4.08185e-144	3.50534e-142
Acinar	ENSG00000170549	IRX1	6.34025	2.07656	629.242	7.30491e-139	5.96568e-137
Acinar	ENSG00000136574	GATA4	-4.68497	3.29421	613.272	2.17263e-135	1.6914e-133
Acinar	ENSG00000106331	PAX4	5.61504	2.94538	594.866	2.18993e-131	1.62152e-129
Acinar	ENSG00000122859	NEUROG3	5.6145	2.20387	560.66	6.04079e-124	4.07448e-122
Acinar	ENSG00000153814	JAZF1	3.4303	3.03392	508.255	1.51976e-112	8.88391e-111
Acinar	ENSG00000134532	SOX5	3.029	3.24075	477.182	8.77042e-106	4.5661e-104
Acinar	ENSG00000009950	MLXIPL	3.51026	4.70428	445.947	5.49752e-99	2.62432e-97
Acinar	ENSG00000134323	MYCN	4.50427	1.94994	438.82	1.95508e-97	9.12369e-96
Acinar	ENSG00000175329	ISX	5.75292	1.71234	428.897	2.82525e-95	1.25852e-93
Acinar	ENSG00000186487	MYT1L	5.29612	3.16143	418.921	4.19007e-93	1.78991e-91
Acinar	ENSG00000143171	RXRG	5.20677	1.94132	417.023	1.08519e-92	4.57701e-91
Acinar	ENSG00000183734	ASCL2	4.18911	5.53382	416.018	1.79546e-92	7.5346e-91
Acinar	ENSG00000150907	FOXO1	2.07006	4.54195	403.63	8.92663e-90	3.58356e-88
Acinar	ENSG00000196132	MYT1	4.69704	2.82812	398.079	1.44215e-88	5.67994e-87
Acinar	ENSG00000118922	KLF12	2.38763	2.54136	382.524	3.51192e-85	1.31185e-83
Acinar	ENSG00000118495	PLAGL1	2.80577	7.01096	377.591	4.16398e-84	1.50481e-82
Acinar	ENSG00000140548	ZNF710	-1.54118	3.40254	375.078	1.4674e-83	5.25738e-82
Acinar	ENSG00000134874	DZIP1	2.30585	3.31605	370.372	1.55279e-82	5.4462e-81
Acinar	ENSG00000107249	GLIS3	1.69977	5.05899	363.934	3.9164e-81	1.32347e-79
Acinar	ENSG00000178662	CSRNP3	1.78282	4.58141	358.05	7.48544e-80	2.43569e-78
Acinar	ENSG00000105419	MEIS3	4.48321	2.03346	339.96	6.51107e-76	2.00507e-74
Acinar	ENSG00000174576	NPAS4	5.25316	2.65304	310.04	2.14088e-69	5.81843e-68
Acinar	ENSG00000169297	NR0B1	6.16392	1.56163	307.526	7.55585e-69	2.0369e-67
Acinar	ENSG00000100219	XBP1	-1.99888	8.06948	290.407	4.05348e-65	1.00343e-63
Acinar	ENSG00000099326	MZF1	1.37326	4.1782	284.381	8.33392e-64	2.02101e-62
Acinar	ENSG00000109906	ZBTB16	-2.09172	2.83252	281.617	3.33661e-63	7.92981e-62
Acinar	ENSG00000101096	NFATC2	-2.27132	2.18506	277.36	2.8244e-62	6.55355e-61
Acinar	ENSG00000178860	MSC	-3.73179	0.378481	277.31	2.89601e-62	6.71037e-61
Acinar	ENSG00000173068	BNC2	-3.52081	0.654588	276.586	4.16567e-62	9.59891e-61
Acinar	ENSG00000136997	MYC	-3.58929	5.35165	270.42	9.19136e-61	2.03357e-59
Acinar	ENSG00000074047	GLI2	-2.79766	0.675273	255.57	1.58547e-57	3.31832e-56
Acinar	ENSG00000119547	ONECUT2	3.58715	1.95356	254.905	2.21395e-57	4.61056e-56
Acinar	ENSG00000162676	GFI1	-4.33597	1.05956	254.577	2.60966e-57	5.42107e-56
Acinar	ENSG00000163623	NKX6-1	1.59927	4.95621	248.693	5.00575e-56	1.01086e-54
Acinar	ENSG00000168062	BATF2	-3.76696	1.09158	245.101	3.03746e-55	5.98866e-54
Acinar	ENSG00000080298	RFX3	1.68355	4.34428	235.279	4.20845e-53	7.86018e-52
Acinar	ENSG00000196482	ESRRG	3.20222	2.16588	234.244	7.07851e-53	1.31469e-51
Acinar	ENSG00000196628	TCF4	2.11302	4.73112	228.089	1.55612e-51	2.79062e-50
Acinar	ENSG00000111269	CREBL2	1.36758	3.49635	223.071	1.93484e-50	3.38242e-49
Acinar	ENSG00000149922	TBX6	-2.39448	2.39098	222.84	2.17243e-50	3.7898e-49
Acinar	ENSG00000232237	ASCL5	-2.97803	0.0602214	218.758	1.68735e-49	2.86849e-48
Acinar	ENSG00000028277	POU2F2	3.08659	2.04228	216.506	5.22926e-49	8.75572e-48
Acinar	ENSG00000185669	SNAI3	-4.50959	1.36817	214.642	1.33384e-48	2.21113e-47
Acinar	ENSG00000171291	ZNF439	1.23901	3.07822	206.964	6.3147e-47	9.82287e-46
Acinar	ENSG00000172379	ARNT2	1.86085	2.78929	199.258	3.03236e-45	4.4866e-44
Acinar	ENSG00000165556	CDX2	3.43537	1.42647	198.463	4.52204e-45	6.66112e-44
Acinar	ENSG00000162772	ATF3	-2.38997	9.16533	179.994	4.86023e-41	6.26229e-40
Acinar	ENSG00000112246	SIM1	1.20752	5.06313	179.792	5.38099e-41	6.91722e-40
Acinar	ENSG00000130584	ZBTB46	3.12153	0.855156	178.92	8.34017e-41	1.0631e-39
Acinar	ENSG00000116833	NR5A2	-2.12601	5.8268	177.089	2.09424e-40	2.64519e-39
Acinar	ENSG00000165066	NKX6-3	6.75313	-0.121875	177.038	2.14889e-40	2.71011e-39
Acinar	ENSG00000104447	TRPS1	1.66675	1.90401	176.982	2.21048e-40	2.78568e-39
Acinar	ENSG00000134138	MEIS2	2.39961	7.76125	176.524	2.78222e-40	3.49298e-39
Acinar	ENSG00000172818	OVOL1	-3.45812	3.77963	175.216	5.37179e-40	6.65383e-39
Acinar	ENSG00000167081	PBX3	1.53731	3.23418	173.577	1.22448e-39	1.49668e-38
Acinar	ENSG00000090447	TFAP4	-1.72383	4.2095	173.563	1.23325e-39	1.5063e-38
Acinar	ENSG00000118263	KLF7	2.45473	3.23283	168.521	1.55669e-38	1.82252e-37
Acinar	ENSG00000125850	OVOL2	2.21071	1.8409	166.88	3.55382e-38	4.12303e-37
Acinar	ENSG00000137166	FOXP4	0.890089	4.63688	166.835	3.63553e-38	4.20903e-37
Acinar	ENSG00000184828	ZBTB7C	-1.84375	1.65973	166.481	4.34383e-38	5.02557e-37
Acinar	ENSG00000116016	EPAS1	-1.3302	4.20033	163.467	1.97826e-37	2.23443e-36
Acinar	ENSG00000124232	RBPJL	-3.8895	7.07587	160.802	7.56012e-37	8.31364e-36
Acinar	ENSG00000174306	ZHX3	1.20318	3.02522	160.778	7.64982e-37	8.40673e-36
Acinar	ENSG00000087903	RFX2	1.63977	2.66114	160.555	8.55807e-37	9.39245e-36
Acinar	ENSG00000085276	MECOM	-1.68611	3.9223	153.597	2.83731e-35	2.94882e-34
Acinar	ENSG00000150347	ARID5B	1.61491	5.06267	153.507	2.96759e-35	3.07463e-34
Acinar	ENSG00000188070	C11orf95	1.5203	3.70805	153.342	3.22461e-35	3.33263e-34
Acinar	ENSG00000103449	SALL1	4.7756	-0.0174337	152.918	3.99282e-35	4.12146e-34
Acinar	ENSG00000170608	FOXA3	-1.23975	4.68939	150.274	1.51045e-34	1.52881e-33
Acinar	ENSG00000124440	HIF3A	1.19727	4.80525	150.241	1.5359e-34	1.55268e-33
Acinar	ENSG00000175395	ZNF25	1.76833	2.25945	150.179	1.58404e-34	1.60037e-33
Acinar	ENSG00000063438	AHRR	4.18787	0.878043	147.867	5.07183e-34	5.0476e-33
Acinar	ENSG00000074657	ZNF532	1.34726	3.49392	147.757	5.36031e-34	5.32515e-33
Acinar	ENSG00000170903	MSANTD4	1.1588	4.45542	146.058	1.26057e-33	1.23173e-32
Acinar	ENSG00000126705	AHDC1	1.06893	3.49691	145.626	1.5671e-33	1.52499e-32
Acinar	ENSG00000088881	EBF4	1.39968	1.92404	140.429	2.1451e-32	2.00434e-31
Acinar	ENSG00000138738	PRDM5	-1.08421	3.082	139.716	3.0716e-32	2.85086e-31
Acinar	ENSG00000136367	ZFHX2	1.70074	2.23132	139.497	3.42909e-32	3.17735e-31
Acinar	ENSG00000166949	SMAD3	-2.14103	4.0133	138.528	5.58722e-32	5.13421e-31
Acinar	ENSG00000245848	CEBPA	-2.07625	1.42534	137.806	8.03754e-32	7.35744e-31
Acinar	ENSG00000138311	ZNF365	5.47343	-0.214587	136.567	1.49953e-31	1.35185e-30
Acinar	ENSG00000151090	THRB	-2.1004	1.82182	135.27	2.88224e-31	2.56507e-30
Acinar	ENSG00000102878	HSF4	2.70477	0.82005	134.144	5.08116e-31	4.47421e-30
Acinar	ENSG00000025434	NR1H3	-1.55788	2.73403	134.031	5.37898e-31	4.72896e-30
Acinar	ENSG00000214575	CPEB1	4.32006	-0.232757	131.821	1.63765e-30	1.40854e-29
Acinar	ENSG00000170396	ZNF804A	4.43861	0.561744	131.38	2.04483e-30	1.75331e-29
Acinar	ENSG00000102984	ZNF821	1.32657	3.69235	130.921	2.57688e-30	2.19483e-29
Acinar	ENSG00000134107	BHLHE40	-1.55329	1.99162	130.061	3.97402e-30	3.35737e-29
Acinar	ENSG00000130254	SAFB2	-0.730428	5.92395	129.815	4.498e-30	3.79235e-29
Acinar	ENSG00000187801	ZFP69B	1.58476	1.55876	128.867	7.25353e-30	6.06951e-29
Acinar	ENSG00000127445	PIN1	0.83412	6.4184	128.602	8.28893e-30	6.92546e-29
Acinar	ENSG00000228623	ZNF883	1.2681	3.601	128.311	9.59589e-30	7.98539e-29
Acinar	ENSG00000185122	HSF1	-0.834521	4.45614	127.601	1.37268e-29	1.13381e-28
Acinar	ENSG00000128573	FOXP2	2.5559	3.54856	127.328	1.57512e-29	1.29716e-28
Acinar	ENSG00000050344	NFE2L3	-2.08505	3.30395	126.114	2.9028e-29	2.36021e-28
Acinar	ENSG00000177888	ZBTB41	0.91638	4.15951	125.793	3.41316e-29	2.76303e-28
Acinar	ENSG00000060138	YBX3	-2.08556	7.20341	124.213	7.56816e-29	6.02991e-28
Acinar	ENSG00000115112	TFCP2L1	2.2468	2.26818	123.586	1.03789e-28	8.21826e-28
Acinar	ENSG00000134954	ETS1	-0.859796	3.82635	123.069	1.34702e-28	1.06408e-27
Acinar	ENSG00000164684	ZNF704	-1.37224	5.9347	122.922	1.45064e-28	1.14376e-27
Acinar	ENSG00000108924	HLF	2.66117	0.984506	119.817	6.93834e-28	5.30486e-27
Acinar	ENSG00000123358	NR4A1	-1.3815	7.21082	118.743	1.19221e-27	9.01599e-27
Acinar	ENSG00000170345	FOS	-1.14323	10.7118	118.216	1.55511e-27	1.17232e-26
Acinar	ENSG00000126603	GLIS2	0.826504	3.07194	117.11	2.71557e-27	2.02694e-26
Acinar	ENSG00000151322	NPAS3	1.57394	2.73942	116.315	4.05518e-27	3.0013e-26
Acinar	ENSG00000101057	MYBL2	-2.30646	2.47582	116.11	4.49687e-27	3.31641e-26
Acinar	ENSG00000148516	ZEB1	2.18303	2.5132	115.824	5.19401e-27	3.81367e-26
Acinar	ENSG00000011332	DPF1	3.07563	0.289761	115.091	7.51665e-27	5.48041e-26
Acinar	ENSG00000120693	SMAD9	1.63914	2.00875	113.822	1.42551e-26	1.02676e-25
Acinar	ENSG00000221869	CEBPD	-1.97937	6.04383	113.74	1.48601e-26	1.06987e-25
Acinar	ENSG00000105516	DBP	-1.43646	3.28139	113.651	1.55358e-26	1.11707e-25
Acinar	ENSG00000197841	ZNF181	-0.844581	3.93444	113.552	1.63326e-26	1.17335e-25
Acinar	ENSG00000121454	LHX4	2.49939	1.77618	113.496	1.68043e-26	1.20673e-25
Acinar	ENSG00000171223	JUNB	-1.38849	8.54726	113.382	1.77938e-26	1.27558e-25
Acinar	ENSG00000163909	HEYL	-2.28035	2.98883	113.152	1.99813e-26	1.4287e-25
Acinar	ENSG00000171425	ZNF581	-0.866509	4.53216	112.612	2.62429e-26	1.8692e-25
Acinar	ENSG00000068305	MEF2A	0.891178	4.75927	112.282	3.09993e-26	2.20328e-25
Acinar	ENSG00000125740	FOSB	-1.34619	8.36899	110.532	7.49104e-26	5.22397e-25
Acinar	ENSG00000160321	ZNF208	2.74258	2.0328	109.26	1.42326e-25	9.75378e-25
Acinar	ENSG00000198963	RORB	4.83567	-0.240104	108.865	1.73725e-25	1.18714e-24
Acinar	ENSG00000106261	ZKSCAN1	0.90969	7.43712	107.908	2.81574e-25	1.90692e-24
Acinar	ENSG00000122877	EGR2	-1.2992	4.29437	107.807	2.96281e-25	2.00407e-24
Acinar	ENSG00000148737	TCF7L2	-1.03115	5.40609	104.765	1.37493e-24	9.06107e-24
Acinar	ENSG00000082641	NFE2L1	0.66155	4.71773	104.598	1.49627e-24	9.83734e-24
Acinar	ENSG00000168267	PTF1A	-3.79769	5.56609	104.496	1.57471e-24	1.03408e-23
Acinar	ENSG00000131116	ZNF428	0.71182	6.54515	104.467	1.59837e-24	1.04921e-23
Acinar	ENSG00000165655	ZNF503	-1.90649	6.06473	103.34	2.82267e-24	1.8355e-23
Acinar	ENSG00000171532	NEUROD2	4.41608	-0.0409767	103.125	3.14589e-24	2.04091e-23
Acinar	ENSG00000184939	ZFP90	0.828529	4.19745	102.943	3.44923e-24	2.23335e-23
Acinar	ENSG00000204060	FOXO6	1.88473	1.60237	101.697	6.46956e-24	4.12172e-23
Acinar	ENSG00000136866	ZFP37	1.27479	2.36803	101.262	8.05687e-24	5.10953e-23
Acinar	ENSG00000132604	TERF2	-0.737665	4.32189	100.165	1.40249e-23	8.80389e-23
Acinar	ENSG00000075426	FOSL2	-1.43243	3.66593	98.1192	3.9394e-23	2.42806e-22
Acinar	ENSG00000152926	ZNF117	0.980178	3.17283	97.8588	4.49314e-23	2.76322e-22
Acinar	ENSG00000169989	TIGD4	2.01347	0.728201	97.8458	4.52264e-23	2.78034e-22
Acinar	ENSG00000237440	ZNF737	0.783782	3.49733	97.83	4.55888e-23	2.80158e-22
Acinar	ENSG00000066697	MSANTD3	0.909057	3.78374	97.5845	5.16051e-23	3.16081e-22
Acinar	ENSG00000129654	FOXJ1	2.81055	2.83695	97.2623	6.07259e-23	3.70584e-22
Acinar	ENSG00000167074	TEF	-0.959436	3.24739	96.5426	8.73454e-23	5.29347e-22
Acinar	ENSG00000197647	ZNF433	-1.04582	3.24397	96.122	1.08016e-22	6.51303e-22
Acinar	ENSG00000102935	ZNF423	-1.40544	2.39863	95.9868	1.15653e-22	6.9584e-22
Acinar	ENSG00000263001	GTF2I	0.635401	7.67023	93.4752	4.11327e-22	2.40699e-21
Acinar	ENSG00000184635	ZNF93	-1.52581	4.28592	93.4298	4.20861e-22	2.46192e-21
Acinar	ENSG00000178187	ZNF454	0.922787	2.98774	93.0975	4.97795e-22	2.89671e-21
Acinar	ENSG00000111145	ELK3	-1.18512	1.80222	92.7764	5.85494e-22	3.39163e-21
Acinar	ENSG00000177606	JUN	-1.21406	10.8489	92.3522	7.25465e-22	4.18934e-21
Acinar	ENSG00000165821	SALL2	1.02419	3.00846	90.9323	1.4867e-21	8.47364e-21
Acinar	ENSG00000197044	ZNF441	1.0995	3.14889	90.8598	1.54223e-21	8.78022e-21
Acinar	ENSG00000175727	MLXIP	-0.716349	5.02337	90.3858	1.95967e-21	1.10859e-20
Acinar	ENSG00000128272	ATF4	-0.822071	7.03008	90.2326	2.1174e-21	1.19498e-20
Acinar	ENSG00000141510	TP53	-0.760143	3.55717	89.8961	2.50999e-21	1.40891e-20
Acinar	ENSG00000138378	STAT4	2.1005	0.701861	89.4151	3.20076e-21	1.78523e-20
Acinar	ENSG00000182463	TSHZ2	0.737106	5.12958	88.9773	3.99368e-21	2.21856e-20
Acinar	ENSG00000197905	TEAD4	-2.65296	2.15248	88.3531	5.47546e-21	3.01857e-20
Acinar	ENSG00000143067	ZNF697	1.26987	2.38502	88.0684	6.32297e-21	3.48004e-20
Acinar	ENSG00000082175	PGR	4.53418	-0.310299	87.2548	9.54034e-21	5.20951e-20
Acinar	ENSG00000181472	ZBTB2	-0.882446	2.80514	87.0851	1.03949e-20	5.66502e-20
Acinar	ENSG00000234616	JRK	1.01129	2.686	86.8495	1.171e-20	6.36505e-20
Acinar	ENSG00000130675	MNX1	1.11967	5.51114	86.2081	1.61961e-20	8.75209e-20
Acinar	ENSG00000213096	ZNF254	0.708523	4.50938	85.9658	1.83079e-20	9.87087e-20
Acinar	ENSG00000178177	LCORL	0.830302	5.19609	85.9282	1.8659e-20	1.00569e-19
Acinar	ENSG00000148143	ZNF462	1.10752	4.01309	85.747	2.04499e-20	1.09866e-19
Acinar	ENSG00000173258	ZNF483	1.7198	3.13453	85.5885	2.21556e-20	1.18839e-19
Acinar	ENSG00000067082	KLF6	-1.25413	7.84388	84.2969	4.25774e-20	2.25761e-19
Acinar	ENSG00000136944	LMX1B	3.6461	0.0158933	83.9235	5.14297e-20	2.71833e-19
Acinar	ENSG00000180535	BHLHA15	-3.92785	-1.12334	83.7757	5.54219e-20	2.9247e-19
Acinar	ENSG00000168214	RBPJ	-2.22706	9.7158	83.6094	6.02863e-20	3.17437e-19
Acinar	ENSG00000160007	ARHGAP35	0.611512	4.27656	83.4758	6.45011e-20	3.39522e-19
Acinar	ENSG00000161298	ZNF382	1.48637	2.19201	83.2499	7.23089e-20	3.79183e-19
Acinar	ENSG00000168772	CXXC4	0.759773	5.64351	82.4731	1.07117e-19	5.56111e-19
Acinar	ENSG00000025156	HSF2	0.603783	4.02121	81.3615	1.8798e-19	9.68085e-19
Acinar	ENSG00000188227	ZNF793	0.907487	3.79631	81.2918	1.94734e-19	1.00194e-18
Acinar	ENSG00000196381	ZNF781	1.72299	2.50842	80.8738	2.40606e-19	1.23224e-18
Acinar	ENSG00000127124	HIVEP3	1.12852	2.15792	80.6771	2.65778e-19	1.35824e-18
Acinar	ENSG00000124766	SOX4	1.04524	8.36685	80.4483	2.98415e-19	1.52176e-18
Acinar	ENSG00000214029	ZNF891	0.938958	3.70401	79.0438	6.07486e-19	3.03925e-18
Acinar	ENSG00000119138	KLF9	-2.29103	1.17307	78.4744	8.10435e-19	4.0304e-18
Acinar	ENSG00000144331	ZNF385B	-2.52178	4.20489	78.4085	8.37914e-19	4.16333e-18
Acinar	ENSG00000243660	ZNF487	0.956	3.00627	77.7858	1.14845e-18	5.65904e-18
Acinar	ENSG00000169981	ZNF35	0.920446	3.13076	77.3084	1.4624e-18	7.15944e-18
Acinar	ENSG00000178573	MAF	2.02299	2.93492	76.4646	2.24195e-18	1.08831e-17
Acinar	ENSG00000028839	TBPL1	0.724147	4.56839	76.0335	2.78899e-18	1.34836e-17
Acinar	ENSG00000179627	ZBTB42	-0.986712	2.07102	75.721	3.26713e-18	1.57312e-17
Acinar	ENSG00000117707	PROX1	0.678333	6.63093	74.6348	5.66371e-18	2.68825e-17
Acinar	ENSG00000120738	EGR1	-0.843415	8.57375	74.5619	5.87676e-18	2.78842e-17
Acinar	ENSG00000278129	ZNF8	0.86084	2.53252	74.4069	6.35667e-18	3.01115e-17
Acinar	ENSG00000099364	FBXL19	0.874906	2.37394	74.2714	6.80829e-18	3.2205e-17
Acinar	ENSG00000119508	NR4A3	-1.50858	4.70481	74.2618	6.84161e-18	3.23443e-17
Acinar	ENSG00000115415	STAT1	0.850292	4.70639	74.1474	7.2495e-18	3.41853e-17
Acinar	ENSG00000091656	ZFHX4	2.12347	1.62936	73.9403	8.05158e-18	3.7839e-17
Acinar	ENSG00000120784	ZFP30	0.87195	3.16543	73.6168	9.48525e-18	4.44388e-17
Acinar	ENSG00000186350	RXRA	0.75141	3.92553	73.3839	1.06734e-17	4.98932e-17
Acinar	ENSG00000152284	TCF7L1	-1.57741	4.21397	73.2751	1.12781e-17	5.25575e-17
Acinar	ENSG00000113916	BCL6	-1.79715	2.97281	71.944	2.2139e-17	1.01692e-16
Acinar	ENSG00000113658	SMAD5	0.545254	5.22542	71.6369	2.58672e-17	1.18327e-16
Acinar	ENSG00000118513	MYB	2.43033	0.0891853	71.5625	2.68614e-17	1.22707e-16
Acinar	ENSG00000104856	RELB	-1.25576	1.86721	71.0308	3.51699e-17	1.60178e-16
Acinar	ENSG00000139352	ASCL1	2.74523	-0.152498	70.6501	4.26544e-17	1.93472e-16
Acinar	ENSG00000169856	ONECUT1	-1.56407	5.36518	69.568	7.38241e-17	3.31691e-16
Acinar	ENSG00000177842	ZNF620	0.710689	3.8071	69.2974	8.46818e-17	3.79655e-16
Acinar	ENSG00000167034	NKX3-1	-2.00798	1.04769	68.5629	1.22892e-16	5.45531e-16
Acinar	ENSG00000196268	ZNF493	0.622107	4.43455	68.2866	1.41378e-16	6.26092e-16
Acinar	ENSG00000081059	TCF7	-0.835482	3.33069	68.1163	1.54132e-16	6.80943e-16
Acinar	ENSG00000197863	ZNF790	0.812238	3.21684	68.0257	1.61376e-16	7.11436e-16
Acinar	ENSG00000142409	ZNF787	-0.846715	4.3207	67.8209	1.79043e-16	7.88074e-16
Acinar	ENSG00000143614	GATAD2B	0.674895	4.01036	66.9852	2.7355e-16	1.19022e-15
Acinar	ENSG00000184517	ZFP1	1.07471	2.72324	66.641	3.25745e-16	1.41179e-15
Acinar	ENSG00000146285	SCML4	2.03689	1.06751	66.5981	3.32909e-16	1.44209e-15
Acinar	ENSG00000105717	PBX4	1.87143	0.514757	66.3103	3.85245e-16	1.66145e-15
Acinar	ENSG00000198105	ZNF248	0.782897	4.22552	66.0728	4.34573e-16	1.86598e-15
Acinar	ENSG00000170515	PA2G4	-0.602448	6.8626	66.0078	4.4914e-16	1.92654e-15
Acinar	ENSG00000142065	ZFP14	0.668982	4.06983	65.939	4.65105e-16	1.99399e-15
Acinar	ENSG00000171827	ZNF570	0.687858	3.04482	65.6599	5.3584e-16	2.28959e-15
Acinar	ENSG00000043039	BARX2	2.06731	0.803414	65.634	5.42927e-16	2.31927e-15
Acinar	ENSG00000165030	NFIL3	-1.03053	4.68153	65.5406	5.69298e-16	2.4257e-15
Acinar	ENSG00000214717	ZBED1	-0.758751	5.00673	65.529	5.72649e-16	2.43873e-15
Acinar	ENSG00000166704	ZNF606	0.701905	3.14518	65.1562	6.9189e-16	2.9338e-15
Acinar	ENSG00000176293	ZNF135	0.857252	2.74104	65.0566	7.27784e-16	3.07826e-15
Acinar	ENSG00000186918	ZNF395	-0.695262	4.17469	63.9847	1.25389e-15	5.21722e-15
Acinar	ENSG00000176887	SOX11	1.91958	4.05248	63.9431	1.28065e-15	5.32725e-15
Acinar	ENSG00000069667	RORA	-0.707624	4.36079	63.8713	1.3282e-15	5.51814e-15
Acinar	ENSG00000120963	ZNF706	-0.620962	6.93195	63.3154	1.76126e-15	7.26842e-15
Acinar	ENSG00000152443	ZNF776	0.786433	2.88755	63.2872	1.78661e-15	7.36756e-15
Acinar	ENSG00000137309	HMGA1	-0.580134	5.93303	62.3902	2.8172e-15	1.14726e-14
Acinar	ENSG00000197619	ZNF615	-0.884563	2.74688	62.3793	2.83292e-15	1.15338e-14
Acinar	ENSG00000170485	NPAS2	-1.5974	3.94914	62.2207	3.0704e-15	1.24824e-14
Acinar	ENSG00000109320	NFKB1	-0.60468	4.35911	62.16	3.16658e-15	1.28515e-14
Acinar	ENSG00000109787	KLF3	-0.804448	5.79187	61.9938	3.4454e-15	1.3966e-14
Acinar	ENSG00000118707	TGIF2	-0.899356	4.27517	61.0928	5.44483e-15	2.17636e-14
Acinar	ENSG00000171606	ZNF274	-0.8139	3.00025	60.9913	5.73277e-15	2.28761e-14
Acinar	ENSG00000123636	BAZ2B	0.581918	6.67422	60.9783	5.77086e-15	2.30226e-14
Acinar	ENSG00000067066	SP100	-1.27663	3.67913	60.9581	5.83031e-15	2.3232e-14
Acinar	ENSG00000181007	ZFP82	0.827295	2.8387	60.8853	6.04984e-15	2.4078e-14
Acinar	ENSG00000170365	SMAD1	-0.706459	3.63525	60.1996	8.571e-15	3.38131e-14
Acinar	ENSG00000138073	PREB	-0.529151	3.99548	59.5329	1.20265e-14	4.70995e-14
Acinar	ENSG00000179981	TSHZ1	0.752485	4.43354	59.3708	1.30594e-14	5.10247e-14
Acinar	ENSG00000113580	NR3C1	0.718246	5.04014	59.2565	1.38399e-14	5.40111e-14
Acinar	ENSG00000243943	ZNF512	0.584948	4.01315	59.0838	1.51101e-14	5.88713e-14
Acinar	ENSG00000171443	ZNF524	-0.909633	3.93273	58.0344	2.57569e-14	9.88277e-14
Acinar	ENSG00000139083	ETV6	-0.923402	3.61629	57.7236	3.01666e-14	1.1527e-13
Acinar	ENSG00000012504	NR1H4	2.65136	-0.739004	57.7012	3.05117e-14	1.16562e-13
Acinar	ENSG00000166888	STAT6	-0.839737	3.20198	57.4583	3.45227e-14	1.31553e-13
Acinar	ENSG00000157429	ZNF19	0.944006	2.29644	57.4162	3.52699e-14	1.34369e-13
Acinar	ENSG00000177732	SOX12	0.564461	3.85492	56.7392	4.97613e-14	1.87817e-13
Acinar	ENSG00000141258	SGSM2	0.519928	3.75979	56.5991	5.3436e-14	2.00958e-13
Acinar	ENSG00000197279	ZNF165	-1.46787	3.07697	56.117	6.82857e-14	2.55649e-13
Acinar	ENSG00000186660	ZFP91	-0.529183	4.48447	56.1082	6.85916e-14	2.56679e-13
Acinar	ENSG00000135374	ELF5	-1.73623	4.95389	56.0725	6.98461e-14	2.61198e-13
Acinar	ENSG00000105856	HBP1	-0.657999	5.46572	56.0248	7.15632e-14	2.67559e-13
Acinar	ENSG00000167232	ZNF91	0.542739	5.54113	55.9833	7.30892e-14	2.73019e-13
Acinar	ENSG00000169136	ATF5	-0.706162	3.89168	55.9527	7.42374e-14	2.7706e-13
Acinar	ENSG00000175592	FOSL1	-1.52219	1.4551	55.9155	7.56525e-14	2.82088e-13
Acinar	ENSG00000164107	HAND2	1.32758	1.28793	55.8559	7.79821e-14	2.9045e-13
Acinar	ENSG00000168916	ZNF608	0.533383	5.28802	55.8017	8.01634e-14	2.98374e-13
Acinar	ENSG00000101493	ZNF516	0.782115	3.29955	55.7513	8.22455e-14	3.05987e-13
Acinar	ENSG00000121413	ZSCAN18	0.504257	5.3953	55.5541	9.092e-14	3.37281e-13
Acinar	ENSG00000167685	ZNF444	-0.811907	4.57787	55.5181	9.26002e-14	3.43284e-13
Acinar	ENSG00000172733	PURG	2.6739	-0.21784	55.0427	1.17942e-13	4.34715e-13
Acinar	ENSG00000181315	ZNF322	0.512145	4.87174	54.9449	1.23959e-13	4.56093e-13
Acinar	ENSG00000100207	TCF20	0.942882	3.37286	54.7382	1.37701e-13	5.04864e-13
Acinar	ENSG00000204611	ZNF616	-0.649901	2.88999	54.6951	1.40756e-13	5.15611e-13
Acinar	ENSG00000176371	ZSCAN2	0.695679	2.83417	54.5364	1.52599e-13	5.57887e-13
Acinar	ENSG00000134046	MBD2	-0.838156	4.59655	54.3895	1.6444e-13	6.00257e-13
Acinar	ENSG00000124664	SPDEF	3.20825	-0.873239	54.2843	1.73485e-13	6.32165e-13
Acinar	ENSG00000123405	NFE2	-2.45195	1.09632	54.0262	1.97834e-13	7.19632e-13
Acinar	ENSG00000177045	SIX5	-1.33105	3.18486	54.0011	2.00378e-13	7.2825e-13
Acinar	ENSG00000143373	ZNF687	-0.56645	2.90366	53.9991	2.00576e-13	7.28812e-13
Acinar	ENSG00000196597	ZNF782	-0.956453	2.07404	53.9869	2.01827e-13	7.33036e-13
Acinar	ENSG00000182141	ZNF708	0.512894	4.25294	53.8205	2.19674e-13	7.95084e-13
Acinar	ENSG00000101076	HNF4A	-0.630289	3.34637	53.793	2.22768e-13	8.05933e-13
Acinar	ENSG00000140836	ZFHX3	-0.633918	5.61613	53.7102	2.32355e-13	8.40434e-13
Acinar	ENSG00000173825	TIGD3	1.78316	-0.0835256	53.0783	3.20518e-13	1.15083e-12
Acinar	ENSG00000143578	CREB3L4	-0.725373	3.63328	52.8705	3.5628e-13	1.27538e-12
Acinar	ENSG00000189180	ZNF33A	0.442606	5.51442	52.4578	4.39595e-13	1.56756e-12
Acinar	ENSG00000197372	ZNF675	0.482117	3.68069	52.3712	4.59422e-13	1.63651e-12
Acinar	ENSG00000260428	SCX	2.05751	0.947092	52.1813	5.06055e-13	1.79648e-12
Acinar	ENSG00000198945	L3MBTL3	0.564037	3.07144	51.556	6.95819e-13	2.44823e-12
Acinar	ENSG00000130816	DNMT1	0.63582	4.82646	51.0433	9.03514e-13	3.15104e-12
Acinar	ENSG00000170100	ZNF778	1.0368	2.19341	50.958	9.43657e-13	3.28623e-12
Acinar	ENSG00000107175	CREB3	-0.524856	4.83279	50.3135	1.31043e-12	4.53601e-12
Acinar	ENSG00000196670	ZFP62	-0.565332	3.89646	49.6897	1.80086e-12	6.18096e-12
Acinar	ENSG00000237765	FAM200B	0.51858	5.99952	49.6655	1.82323e-12	6.25386e-12
Acinar	ENSG00000100625	SIX4	-1.27038	1.83457	48.8058	2.82603e-12	9.55973e-12
Acinar	ENSG00000171817	ZNF540	1.22753	1.80997	48.3653	3.53768e-12	1.19042e-11
Acinar	ENSG00000171295	ZNF440	-0.745565	2.03498	48.0513	4.15209e-12	1.39351e-11
Acinar	ENSG00000157657	ZNF618	0.700498	4.86393	47.9836	4.29794e-12	1.44072e-11
Acinar	ENSG00000196867	ZFP28	0.857639	2.1689	47.8825	4.5254e-12	1.51483e-11
Acinar	ENSG00000136603	SKIL	-0.660201	5.64933	47.7424	4.86075e-12	1.6222e-11
Acinar	ENSG00000170631	ZNF16	-0.622572	2.93013	47.6925	4.98585e-12	1.66162e-11
Acinar	ENSG00000084676	NCOA1	0.462637	4.72277	47.2581	6.22271e-12	2.05981e-11
Acinar	ENSG00000025293	PHF20	0.533023	4.90612	47.1481	6.58201e-12	2.17399e-11
Acinar	ENSG00000101544	ADNP2	-0.708904	3.80389	47.0307	6.98841e-12	2.30412e-11
Acinar	ENSG00000189144	ZNF573	0.583664	2.60161	46.9874	7.14428e-12	2.35504e-11
Acinar	ENSG00000155090	KLF10	-0.612346	5.62802	46.9107	7.42948e-12	2.44712e-11
Acinar	ENSG00000005801	ZNF195	0.438089	4.22429	46.8191	7.78491e-12	2.56166e-11
Acinar	ENSG00000131408	NR1H2	-0.760628	3.90181	46.6576	8.4538e-12	2.77408e-11
Acinar	ENSG00000126368	NR1D1	-1.11373	2.78393	46.6379	8.53935e-12	2.80105e-11
Acinar	ENSG00000242852	ZNF709	1.34549	0.472417	46.0971	1.12535e-11	3.67039e-11
Acinar	ENSG00000112561	TFEB	1.56436	1.42493	46.0206	1.17014e-11	3.81052e-11
Acinar	ENSG00000106536	POU6F2	1.07456	2.527	45.8819	1.256e-11	4.08372e-11
Acinar	ENSG00000198440	ZNF583	0.541342	3.0608	45.8234	1.29406e-11	4.20501e-11
Acinar	ENSG00000196391	ZNF774	0.901673	1.39517	45.7658	1.33271e-11	4.32656e-11
Acinar	ENSG00000122034	GTF3A	-0.635448	5.79521	45.5338	1.5003e-11	4.85624e-11
Acinar	ENSG00000196267	ZNF836	0.839544	2.38737	45.1617	1.81422e-11	5.83942e-11
Acinar	ENSG00000117595	IRF6	-0.572361	3.52668	45.0992	1.87298e-11	6.0239e-11
Acinar	ENSG00000165156	ZHX1	0.476071	5.04139	45.0291	1.94126e-11	6.23629e-11
Acinar	ENSG00000136451	VEZF1	0.450703	5.18324	44.8919	2.08218e-11	6.67483e-11
Acinar	ENSG00000173451	THAP2	0.613405	3.76527	44.8446	2.13313e-11	6.83423e-11
Acinar	ENSG00000086102	NFX1	-0.461863	4.14976	44.8199	2.16013e-11	6.9194e-11
Acinar	ENSG00000177463	NR2C2	0.57412	3.43915	44.4192	2.65077e-11	8.43265e-11
Acinar	ENSG00000183850	ZNF730	1.10419	1.38853	44.2571	2.87952e-11	9.13071e-11
Acinar	ENSG00000127152	BCL11B	-1.23298	2.82078	44.0856	3.14323e-11	9.94232e-11
Acinar	ENSG00000158773	USF1	0.845154	1.60729	43.8905	3.47274e-11	1.09368e-10
Acinar	ENSG00000135373	EHF	0.804905	4.86182	43.7842	3.66647e-11	1.1523e-10
Acinar	ENSG00000198783	ZNF830	-0.438927	4.70921	43.1166	5.15717e-11	1.60896e-10
Acinar	ENSG00000130522	JUND	-0.827881	9.0813	43.0821	5.24892e-11	1.63697e-10
Acinar	ENSG00000105672	ETV2	-0.814757	3.01704	42.9673	5.56616e-11	1.73266e-10
Acinar	ENSG00000105722	ERF	-0.771606	3.91843	42.9114	5.72757e-11	1.78025e-10
Acinar	ENSG00000172216	CEBPB	-1.0529	5.47555	42.7948	6.0795e-11	1.88717e-10
Acinar	ENSG00000160113	NR2F6	-0.750482	5.66542	42.6114	6.67703e-11	2.06726e-10
Acinar	ENSG00000160908	ZNF394	-0.548325	4.09684	42.61	6.68164e-11	2.0683e-10
Acinar	ENSG00000135365	PHF21A	0.477182	4.05074	42.5273	6.97037e-11	2.15648e-10
Acinar	ENSG00000196458	ZNF605	0.55419	4.19465	42.2649	7.97112e-11	2.45742e-10
Acinar	ENSG00000163884	KLF15	-2.4101	0.392282	42.2074	8.20873e-11	2.52974e-10
Acinar	ENSG00000179456	ZBTB18	-0.56744	3.83644	42.1131	8.61437e-11	2.64984e-10
Acinar	ENSG00000137185	ZSCAN9	0.561262	3.09721	41.6941	1.06729e-10	3.26439e-10
Acinar	ENSG00000152467	ZSCAN1	1.01685	2.20287	41.5426	1.15333e-10	3.51721e-10
Acinar	ENSG00000084093	REST	-1.20344	5.45536	41.3061	1.30165e-10	3.95648e-10
Acinar	ENSG00000142611	PRDM16	-0.851754	3.75953	41.276	1.32184e-10	4.01493e-10
Acinar	ENSG00000165684	SNAPC4	0.609786	2.42288	41.1162	1.43442e-10	4.34658e-10
Acinar	ENSG00000175197	DDIT3	-0.665762	5.63161	40.9753	1.54163e-10	4.65956e-10
Acinar	ENSG00000189420	ZFP92	2.37977	-0.690232	40.8644	1.63164e-10	4.92538e-10
Acinar	ENSG00000227124	ZNF717	-0.59539	3.16473	40.8025	1.68418e-10	5.08029e-10
Acinar	ENSG00000198046	ZNF667	0.559399	3.9382	40.0822	2.43503e-10	7.26888e-10
Acinar	ENSG00000165259	HDX	0.745983	2.94435	40.0008	2.53856e-10	7.56573e-10
Acinar	ENSG00000138336	TET1	0.568809	4.79668	39.9882	2.55505e-10	7.61216e-10
Acinar	ENSG00000162599	NFIA	-0.804233	5.05922	39.8252	2.77745e-10	8.25259e-10
Acinar	ENSG00000144655	CSRNP1	-0.926827	4.59258	39.7178	2.93433e-10	8.70636e-10
Acinar	ENSG00000221944	TIGD1	0.69821	2.49927	39.4966	3.28631e-10	9.73505e-10
Acinar	ENSG00000074219	TEAD2	-1.20714	4.33597	39.2752	3.6808e-10	1.08824e-09
Acinar	ENSG00000181722	ZBTB20	0.510442	4.7161	38.8503	4.57588e-10	1.34547e-09
Acinar	ENSG00000254004	ZNF260	0.452825	3.90796	38.7424	4.83596e-10	1.41844e-09
Acinar	ENSG00000008441	NFIX	0.899892	1.47015	38.567	5.29054e-10	1.5485e-09
Acinar	ENSG00000185022	MAFF	-1.47022	6.15954	38.0951	6.73791e-10	1.95734e-09
Acinar	ENSG00000185238	PRMT3	-0.571685	2.39126	38.0659	6.83946e-10	1.98511e-09
Acinar	ENSG00000120690	ELF1	-0.462106	5.4778	37.8951	7.46522e-10	2.16221e-09
Acinar	ENSG00000197162	ZNF785	0.527519	3.38503	37.6889	8.29745e-10	2.39576e-09
Acinar	ENSG00000157613	CREB3L1	-1.86813	1.11207	37.6377	8.51801e-10	2.45774e-09
Acinar	ENSG00000112200	ZNF451	0.399272	4.97735	37.6242	8.57722e-10	2.47397e-09
Acinar	ENSG00000147118	ZNF182	0.687951	2.40406	37.615	8.61775e-10	2.48523e-09
Acinar	ENSG00000154655	L3MBTL4	1.32625	0.859522	37.5397	8.95695e-10	2.57903e-09
Acinar	ENSG00000173039	RELA	-0.553251	3.57053	37.4419	9.41762e-10	2.70746e-09
Acinar	ENSG00000105698	USF2	0.435888	5.1031	37.397	9.63691e-10	2.76764e-09
Acinar	ENSG00000178665	ZNF713	0.826073	1.93493	37.2782	1.02424e-09	2.93748e-09
Acinar	ENSG00000196378	ZNF34	0.586836	2.88781	36.9996	1.18155e-09	3.37354e-09
Acinar	ENSG00000125520	SLC2A4RG	-0.591436	5.251	36.6351	1.42443e-09	4.04622e-09
Acinar	ENSG00000140382	HMG20A	-0.539092	4.19225	36.5556	1.48375e-09	4.2104e-09
Acinar	ENSG00000185513	L3MBTL1	0.857195	2.3167	36.1993	1.78136e-09	5.03348e-09
Acinar	ENSG00000062370	ZNF112	0.58166	2.09374	36.0401	1.93295e-09	5.44704e-09
Acinar	ENSG00000007866	TEAD3	-1.41362	2.93936	35.8064	2.1793e-09	6.1185e-09
Acinar	ENSG00000243678	NME2	-0.586116	2.7663	35.483	2.57289e-09	7.19684e-09
Acinar	ENSG00000205683	DPF3	1.73181	0.58999	35.3295	2.7838e-09	7.75812e-09
Acinar	ENSG00000214189	ZNF788	-0.87061	0.469757	34.9062	3.4597e-09	9.57293e-09
Acinar	ENSG00000204514	ZNF814	-0.502489	4.41392	34.8792	3.50815e-09	9.70376e-09
Acinar	ENSG00000171604	CXXC5	-0.533553	6.38246	34.6556	3.9351e-09	1.08487e-08
Acinar	ENSG00000146592	CREB5	0.756728	1.60579	34.6448	3.95703e-09	1.09056e-08
Acinar	ENSG00000162664	ZNF326	0.399922	6.15774	34.5247	4.20886e-09	1.15652e-08
Acinar	ENSG00000164749	HNF4G	-1.36276	0.474736	34.3353	4.63882e-09	1.27026e-08
Acinar	ENSG00000124782	RREB1	-0.43497	4.44275	34.158	5.08141e-09	1.38803e-08
Acinar	ENSG00000197362	ZNF786	0.694346	2.26712	34.0532	5.36244e-09	1.46097e-08
Acinar	ENSG00000126456	IRF3	-0.485432	4.85821	33.9971	5.51941e-09	1.50202e-08
Acinar	ENSG00000175832	ETV4	1.3905	0.0418111	33.9691	5.59953e-09	1.52208e-08
Acinar	ENSG00000103343	ZNF174	0.690552	2.34274	33.9686	5.60095e-09	1.52222e-08
Acinar	ENSG00000196150	ZNF250	0.531119	2.94958	33.6382	6.63763e-09	1.7946e-08
Acinar	ENSG00000197608	ZNF841	-0.643263	2.58443	33.5389	6.98523e-09	1.88674e-08
Acinar	ENSG00000197951	ZNF71	0.546996	2.93548	33.1151	8.68605e-09	2.32802e-08
Acinar	ENSG00000198824	CHAMP1	-0.519393	3.35246	32.9239	9.58391e-09	2.56083e-08
Acinar	ENSG00000129911	KLF16	0.680328	2.93151	32.8154	1.01336e-08	2.70079e-08
Acinar	ENSG00000188321	ZNF559	0.488979	3.47066	32.8041	1.01931e-08	2.71621e-08
Acinar	ENSG00000125618	PAX8	1.13744	0.795749	32.6712	1.09144e-08	2.90007e-08
Acinar	ENSG00000187098	MITF	-0.963734	1.89782	32.6617	1.09676e-08	2.91374e-08
Acinar	ENSG00000186448	ZNF197	0.442873	3.59457	32.6558	1.10008e-08	2.92209e-08
Acinar	ENSG00000196437	ZNF569	0.665549	2.58789	32.5174	1.18133e-08	3.1314e-08
Acinar	ENSG00000121417	ZNF211	0.640472	2.18162	32.4727	1.20879e-08	3.20013e-08
Acinar	ENSG00000137947	GTF2B	-0.558145	5.22834	32.3952	1.25796e-08	3.32502e-08
Acinar	ENSG00000198939	ZFP2	1.14559	0.681889	32.3052	1.31759e-08	3.47821e-08
Acinar	ENSG00000179774	ATOH7	2.16502	-0.747925	31.9593	1.57433e-08	4.13046e-08
Acinar	ENSG00000197385	ZNF860	2.05203	-0.978185	31.8099	1.70022e-08	4.45022e-08
Acinar	ENSG00000111704	NANOG	-1.23145	0.673008	31.6054	1.88905e-08	4.93129e-08
Acinar	ENSG00000116604	MEF2D	-0.481433	3.46603	31.5538	1.93987e-08	5.05922e-08
Acinar	ENSG00000197779	ZNF81	0.91626	1.45281	31.5286	1.96521e-08	5.12048e-08
Acinar	ENSG00000101126	ADNP	0.311081	5.57155	31.5216	1.97239e-08	5.13678e-08
Acinar	ENSG00000183309	ZNF623	0.552563	2.69034	31.3503	2.15422e-08	5.58937e-08
Acinar	ENSG00000198393	ZNF26	0.580847	3.12769	31.35	2.15459e-08	5.58946e-08
Acinar	ENSG00000135148	TRAFD1	0.431117	3.34281	31.3274	2.17985e-08	5.65411e-08
Acinar	ENSG00000147601	TERF1	0.378345	5.24282	30.978	2.60964e-08	6.73534e-08
Acinar	ENSG00000157933	SKI	0.593236	2.96783	30.9428	2.65746e-08	6.85452e-08
Acinar	ENSG00000171634	BPTF	0.420264	7.24116	30.4505	3.42495e-08	8.76761e-08
Acinar	ENSG00000179348	GATA2	-1.6768	0.0773213	30.34	3.62571e-08	9.26873e-08
Acinar	ENSG00000182986	ZNF320	0.448488	3.22147	30.3339	3.63709e-08	9.29355e-08
Acinar	ENSG00000235109	ZSCAN31	-0.97666	2.55537	30.2641	3.77049e-08	9.62114e-08
Acinar	ENSG00000213967	ZNF726	0.836507	1.88642	30.2283	3.84063e-08	9.78812e-08
Acinar	ENSG00000182568	SATB1	-0.440514	4.99388	30.1761	3.94533e-08	1.00411e-07
Acinar	ENSG00000236287	ZBED5	0.421818	4.88819	29.9744	4.37796e-08	1.11184e-07
Acinar	ENSG00000273274	ZBTB8B	1.37641	1.42374	29.8958	4.55902e-08	1.15606e-07
Acinar	ENSG00000059728	MXD1	-0.644967	4.9617	29.6948	5.05692e-08	1.27881e-07
Acinar	ENSG00000164916	FOXK1	0.563128	3.73399	29.4482	5.74322e-08	1.44579e-07
Acinar	ENSG00000116017	ARID3A	0.305819	5.48178	29.3403	6.07212e-08	1.52466e-07
Acinar	ENSG00000161914	ZNF653	0.716799	1.52075	29.2848	6.24844e-08	1.56776e-07
Acinar	ENSG00000198131	ZNF544	0.409732	3.6208	29.1374	6.74218e-08	1.68909e-07
Acinar	ENSG00000185219	ZNF445	0.425836	4.05972	29.0437	7.07657e-08	1.76914e-07
Acinar	ENSG00000178951	ZBTB7A	0.364859	4.69758	29.0199	7.16394e-08	1.78937e-07
Acinar	ENSG00000197935	ZNF311	-1.36552	-0.301772	28.8171	7.95476e-08	1.98155e-07
Acinar	ENSG00000019549	SNAI2	-1.51624	1.39158	28.0923	1.15664e-07	2.83835e-07
Acinar	ENSG00000158055	GRHL3	1.62965	-0.0925415	28.057	1.17795e-07	2.88852e-07
Acinar	ENSG00000053254	FOXN3	0.406755	4.31788	27.9859	1.222e-07	2.99303e-07
Acinar	ENSG00000197360	ZNF98	-1.18393	2.22449	27.9784	1.22678e-07	3.00429e-07
Acinar	ENSG00000166432	ZMAT1	0.513966	4.06401	27.7373	1.38958e-07	3.38753e-07
Acinar	ENSG00000167491	GATAD2A	-0.357813	4.16129	27.6083	1.4854e-07	3.61584e-07
Acinar	ENSG00000143157	POGK	0.36901	4.26296	27.5712	1.51417e-07	3.68425e-07
Acinar	ENSG00000257446	ZNF878	-1.81377	-0.284923	27.4607	1.60318e-07	3.89229e-07
Acinar	ENSG00000127528	KLF2	-0.5687	2.91567	27.4518	1.61056e-07	3.90966e-07
Acinar	ENSG00000172059	KLF11	-0.382039	3.93723	27.363	1.6863e-07	4.08637e-07
Acinar	ENSG00000213020	ZNF611	0.507396	2.73056	27.0933	1.93864e-07	4.67473e-07
Acinar	ENSG00000083307	GRHL2	-0.942794	3.0991	26.8589	2.18868e-07	5.25335e-07
Acinar	ENSG00000277258	PCGF2	0.357427	4.90611	26.7611	2.30231e-07	5.51574e-07
Acinar	ENSG00000198466	ZNF587	0.353574	3.94417	26.7368	2.33135e-07	5.58211e-07
Acinar	ENSG00000112182	BACH2	0.937385	1.84963	26.7364	2.33191e-07	5.58264e-07
Acinar	ENSG00000100146	SOX10	1.52231	0.345286	26.6717	2.41132e-07	5.76447e-07
Acinar	ENSG00000169926	KLF13	-0.464971	4.57444	26.6448	2.44513e-07	5.84278e-07
Acinar	ENSG00000198521	ZNF43	0.383939	4.13763	26.6343	2.45836e-07	5.8727e-07
Acinar	ENSG00000223547	ZNF844	-0.421232	3.88942	26.4334	2.72788e-07	6.49513e-07
Acinar	ENSG00000251247	ZNF345	0.436373	2.55345	26.2792	2.95458e-07	7.01487e-07
Acinar	ENSG00000198040	ZNF84	0.329398	4.38411	26.1752	3.11793e-07	7.38376e-07
Acinar	ENSG00000105497	ZNF175	0.675234	1.87291	26.1367	3.18084e-07	7.52739e-07
Acinar	ENSG00000122085	MTERF4	0.330419	4.86161	26.0092	3.39802e-07	8.02197e-07
Acinar	ENSG00000213676	ATF6B	0.354269	4.87424	25.9482	3.507e-07	8.26754e-07
Acinar	ENSG00000185278	ZBTB37	0.356449	3.54778	25.7728	3.84056e-07	9.02706e-07
Acinar	ENSG00000077150	NFKB2	-0.736889	3.5145	25.7093	3.96914e-07	9.32138e-07
Acinar	ENSG00000166526	ZNF3	0.335797	4.47847	25.6925	4.00373e-07	9.39864e-07
Acinar	ENSG00000177426	TGIF1	-0.926689	5.01658	25.619	4.1592e-07	9.75535e-07
Acinar	ENSG00000108509	CAMTA2	0.46502	2.89219	25.6062	4.1869e-07	9.81617e-07
Acinar	ENSG00000162714	ZNF496	-0.61078	2.61374	25.5252	4.36649e-07	1.02185e-06
Acinar	ENSG00000198169	ZNF251	0.491059	2.24636	25.4927	4.44061e-07	1.03847e-06
Acinar	ENSG00000155592	ZKSCAN2	0.709279	2.28458	25.3227	4.84962e-07	1.13047e-06
Acinar	ENSG00000187607	ZNF286A	0.521954	2.29769	25.1924	5.18869e-07	1.2063e-06
Acinar	ENSG00000101190	TCFL5	0.723114	1.27357	25.1215	5.38288e-07	1.24936e-06
Acinar	ENSG00000103495	MAZ	0.315245	5.1458	25.0761	5.51105e-07	1.27821e-06
Acinar	ENSG00000198146	ZNF770	-0.28579	5.03418	24.9855	5.77629e-07	1.33713e-06
Acinar	ENSG00000105127	AKAP8	-0.363461	3.95237	24.9798	5.79351e-07	1.34074e-06
Acinar	ENSG00000148200	NR6A1	-0.55399	4.08192	24.8605	6.16315e-07	1.42213e-06
Acinar	ENSG00000153975	ZUFSP	0.389222	3.35722	24.8026	6.35107e-07	1.46428e-06
Acinar	ENSG00000135899	SP110	-1.10859	1.02737	24.6428	6.90013e-07	1.5856e-06
Acinar	ENSG00000204304	PBX2	-0.430403	4.79131	24.6021	7.04744e-07	1.61811e-06
Acinar	ENSG00000005513	SOX8	-0.935523	1.08701	24.4224	7.73645e-07	1.77241e-06
Acinar	ENSG00000156273	BACH1	-0.433434	4.67466	24.4078	7.79526e-07	1.78489e-06
Acinar	ENSG00000112658	SRF	-0.914611	4.52845	24.2638	8.40025e-07	1.91868e-06
Acinar	ENSG00000167555	ZNF528	0.409029	3.13998	24.1874	8.74016e-07	1.99385e-06
Acinar	ENSG00000110925	CSRNP2	0.575516	2.42401	24.1545	8.89068e-07	2.02763e-06
Acinar	ENSG00000182158	CREB3L2	-0.388418	5.2205	24.0917	9.18563e-07	2.09318e-06
Acinar	ENSG00000196967	ZNF585A	0.656655	2.39442	24.0425	9.42314e-07	2.14555e-06
Acinar	ENSG00000187772	LIN28B	1.67473	-0.408289	23.856	1.0382e-06	2.35294e-06
Acinar	ENSG00000161551	ZNF577	-0.49007	3.12213	23.8474	1.04285e-06	2.36315e-06
Acinar	ENSG00000178150	ZNF114	-1.38552	0.535839	23.7642	1.08891e-06	2.46249e-06
Acinar	ENSG00000198453	ZNF568	0.455474	4.20888	23.7088	1.12068e-06	2.53161e-06
Acinar	ENSG00000066136	NFYC	-0.386567	4.9201	23.5748	1.20153e-06	2.70982e-06
Acinar	ENSG00000256771	ZNF253	0.315008	3.80412	23.4283	1.2966e-06	2.91673e-06
Acinar	ENSG00000130751	NPAS1	0.906438	0.136513	23.167	1.48525e-06	3.32138e-06
Acinar	ENSG00000145908	ZNF300	0.519257	2.7043	23.1214	1.52087e-06	3.39875e-06
Acinar	ENSG00000175213	ZNF408	-0.444938	2.63192	23.0015	1.61872e-06	3.60532e-06
Acinar	ENSG00000167380	ZNF226	0.351072	4.28044	22.9666	1.64837e-06	3.66697e-06
Acinar	ENSG00000158711	ELK4	0.409625	3.88708	22.9482	1.66427e-06	3.69936e-06
Acinar	ENSG00000167528	ZNF641	0.419098	2.93872	22.9013	1.70541e-06	3.78777e-06
Acinar	ENSG00000124216	SNAI1	1.0557	0.821453	22.8198	1.77926e-06	3.94339e-06
Acinar	ENSG00000111783	RFX4	1.90433	-0.970621	22.7488	1.84624e-06	4.08369e-06
Acinar	ENSG00000108788	MLX	0.303039	4.2076	22.6401	1.95369e-06	4.30934e-06
Acinar	ENSG00000196275	GTF2IRD2	0.456063	3.39156	22.6306	1.96336e-06	4.32894e-06
Acinar	ENSG00000196110	ZNF699	0.61652	1.73287	22.626	1.968e-06	4.33861e-06
Acinar	ENSG00000116990	MYCL	0.881072	2.07189	22.58	2.01568e-06	4.43844e-06
Acinar	ENSG00000144485	HES6	0.912607	4.34013	22.4882	2.11442e-06	4.6491e-06
Acinar	ENSG00000166823	MESP1	0.673055	1.98246	22.149	2.52283e-06	5.50496e-06
Acinar	ENSG00000170684	ZNF296	0.819329	0.715689	22.0511	2.65492e-06	5.78334e-06
Acinar	ENSG00000102974	CTCF	-0.288752	5.35101	22.0491	2.65762e-06	5.78771e-06
Acinar	ENSG00000198597	ZNF536	-1.17083	-0.445246	22.0209	2.69702e-06	5.87043e-06
Acinar	ENSG00000152439	ZNF773	0.563721	2.01421	22.0189	2.6998e-06	5.87572e-06
Acinar	ENSG00000198715	GLMP	-0.382611	4.4569	21.9773	2.75892e-06	5.99499e-06
Acinar	ENSG00000127903	ZNF835	-0.606942	1.92468	21.8682	2.92038e-06	6.33181e-06
Acinar	ENSG00000196456	ZNF775	0.433498	3.33426	21.8486	2.95033e-06	6.39174e-06
Acinar	ENSG00000115966	ATF2	0.285171	4.50279	21.843	2.95902e-06	6.40973e-06
Acinar	ENSG00000130684	ZNF337	0.496145	2.99391	21.7989	3.02767e-06	6.55164e-06
Acinar	ENSG00000125347	IRF1	-0.962612	6.06272	21.6357	3.2965e-06	7.11027e-06
Acinar	ENSG00000168610	STAT3	-0.591985	6.10942	21.5951	3.36707e-06	7.25683e-06
Acinar	ENSG00000081665	ZNF506	0.409979	4.47476	21.5518	3.44405e-06	7.41604e-06
Acinar	ENSG00000126561	STAT5A	-0.773622	0.25134	21.4276	3.67445e-06	7.89685e-06
Acinar	ENSG00000100968	NFATC4	0.655235	2.13356	21.3555	3.81529e-06	8.19002e-06
Acinar	ENSG00000171786	NHLH1	1.84251	-0.533113	21.2284	4.07669e-06	8.73989e-06
Acinar	ENSG00000105750	ZNF85	0.464321	3.06795	21.0978	4.36433e-06	9.33493e-06
Acinar	ENSG00000165512	ZNF22	-0.283855	6.49745	21.0787	4.40797e-06	9.42464e-06
Acinar	ENSG00000177932	ZNF354C	0.542289	2.55073	20.9498	4.71484e-06	1.00601e-05
Acinar	ENSG00000179588	ZFPM1	-0.561857	3.84731	20.7684	5.18299e-06	1.10209e-05
Acinar	ENSG00000129071	MBD4	0.311197	4.76061	20.7374	5.26769e-06	1.11924e-05
Acinar	ENSG00000170265	ZNF282	-0.395845	3.02186	20.6646	5.47195e-06	1.16131e-05
Acinar	ENSG00000036549	ZZZ3	0.272723	4.91903	20.6549	5.49962e-06	1.16688e-05
Acinar	ENSG00000198298	ZNF485	-0.62304	1.51994	20.5111	5.9285e-06	1.25548e-05
Acinar	ENSG00000153234	NR4A2	-0.65938	4.13588	20.4446	6.1383e-06	1.29826e-05
Acinar	ENSG00000140632	GLYR1	0.255112	4.9854	20.3859	6.32928e-06	1.33713e-05
Acinar	ENSG00000186814	ZSCAN30	0.374388	4.0034	20.2944	6.6396e-06	1.40091e-05
Acinar	ENSG00000152804	HHEX	0.538279	5.57484	20.2804	6.68836e-06	1.41102e-05
Acinar	ENSG00000152784	PRDM8	-1.60164	-0.793752	20.1721	7.07761e-06	1.4888e-05
Acinar	ENSG00000180884	ZNF792	-0.75205	0.659721	20.1262	7.24979e-06	1.5229e-05
Acinar	ENSG00000171163	ZNF692	0.446258	3.24042	20.0938	7.37363e-06	1.54798e-05
Acinar	ENSG00000197124	ZNF682	0.410404	2.3603	20.088	7.39586e-06	1.55202e-05
Acinar	ENSG00000176182	MYPOP	0.604289	2.02659	20.0098	7.70459e-06	1.61376e-05
Acinar	ENSG00000176946	THAP4	0.344407	4.3381	19.864	8.3153e-06	1.73665e-05
Acinar	ENSG00000185252	ZNF74	0.374095	2.6292	19.7216	8.95818e-06	1.86741e-05
Acinar	ENSG00000181827	RFX7	0.427369	3.23635	19.5753	9.67133e-06	2.00928e-05
Acinar	ENSG00000153896	ZNF599	0.386572	3.03406	19.245	1.14972e-05	2.37116e-05
Acinar	ENSG00000167962	ZNF598	-0.38274	2.8318	19.014	1.29766e-05	2.66179e-05
Acinar	ENSG00000159216	RUNX1	-0.949327	1.63455	18.9771	1.32296e-05	2.71068e-05
Acinar	ENSG00000125817	CENPB	0.303379	4.27505	18.9032	1.37523e-05	2.81432e-05
Acinar	ENSG00000115816	CEBPZ	-0.28699	5.78611	18.8838	1.38931e-05	2.84103e-05
Acinar	ENSG00000151612	ZNF827	0.3216	4.52452	18.6788	1.5469e-05	3.15284e-05
Acinar	ENSG00000174446	SNAPC5	-0.323486	4.70113	18.6473	1.57266e-05	3.203e-05
Acinar	ENSG00000140262	TCF12	0.467109	5.64928	18.5149	1.68582e-05	3.42634e-05
Acinar	ENSG00000162924	REL	-0.452047	5.93132	18.4846	1.71282e-05	3.47869e-05
Acinar	ENSG00000213762	ZNF134	0.289731	3.67527	18.476	1.72061e-05	3.4928e-05
Acinar	ENSG00000065978	YBX1	-0.334248	8.51411	18.4353	1.75771e-05	3.5655e-05
Acinar	ENSG00000160685	ZBTB7B	-0.535412	2.20621	18.4097	1.78146e-05	3.6106e-05
Acinar	ENSG00000101457	DNTTIP1	-0.300636	4.39735	18.4061	1.78484e-05	3.617e-05
Acinar	ENSG00000125812	GZF1	0.383779	3.26908	18.3935	1.79673e-05	3.64021e-05
Acinar	ENSG00000134317	GRHL1	0.591505	2.912	18.2734	1.91358e-05	3.87037e-05
Acinar	ENSG00000188981	MSANTD1	0.929575	0.912064	18.1926	1.99654e-05	4.0318e-05
Acinar	ENSG00000141448	GATA6	-0.375639	5.13813	18.1304	2.06283e-05	4.15912e-05
Acinar	ENSG00000184895	SRY	1.00403	2.09637	17.9614	2.25426e-05	4.527e-05
Acinar	ENSG00000197808	ZNF461	0.562013	1.46139	17.7989	2.45527e-05	4.91527e-05
Acinar	ENSG00000170448	NFXL1	-0.288712	3.85999	17.7757	2.48536e-05	4.97251e-05
Acinar	ENSG00000177311	ZBTB38	0.319397	4.83669	17.7691	2.49406e-05	4.98812e-05
Acinar	ENSG00000166349	RAG1	-1.05621	-0.462831	17.6687	2.62921e-05	5.24583e-05
Acinar	ENSG00000149948	HMGA2	-0.760365	5.42135	17.627	2.6875e-05	5.35828e-05
Acinar	ENSG00000161642	ZNF385A	1.08267	0.402509	17.5402	2.81303e-05	5.59783e-05
Acinar	ENSG00000083844	ZNF264	0.312715	3.87891	17.381	3.05874e-05	6.06506e-05
Acinar	ENSG00000125398	SOX9	-0.698304	6.04289	17.2529	3.27198e-05	6.4771e-05
Acinar	ENSG00000152475	ZNF837	-0.537231	1.53188	17.21	3.3467e-05	6.62107e-05
Acinar	ENSG00000250312	ZNF718	0.538847	1.82699	17.1183	3.51219e-05	6.93282e-05
Acinar	ENSG00000095794	CREM	-0.365586	4.55791	17.0376	3.66462e-05	7.22259e-05
Acinar	ENSG00000198026	ZNF335	0.586925	2.94863	16.9369	3.86425e-05	7.59718e-05
Acinar	ENSG00000066336	SPI1	0.966069	-0.664069	16.847	4.05163e-05	7.95524e-05
Acinar	ENSG00000116809	ZBTB17	0.341207	3.20504	16.781	4.1952e-05	8.22743e-05
Acinar	ENSG00000124496	TRERF1	0.475019	2.31783	16.7402	4.28626e-05	8.39515e-05
Acinar	ENSG00000141040	ZNF287	0.414663	1.86809	16.7397	4.28739e-05	8.39636e-05
Acinar	ENSG00000117505	DR1	0.302649	4.28378	16.6861	4.41029e-05	8.62792e-05
Acinar	ENSG00000120837	NFYB	-0.297046	4.89193	16.5912	4.63646e-05	9.05549e-05
Acinar	ENSG00000011243	AKAP8L	0.264979	5.37795	16.5465	4.74726e-05	9.26539e-05
Acinar	ENSG00000110851	PRDM4	0.331657	3.15919	16.4421	5.01594e-05	9.75891e-05
Acinar	ENSG00000173276	ZBTB21	-0.437932	3.90975	16.4358	5.03262e-05	9.78909e-05
Acinar	ENSG00000143842	SOX13	-0.425223	2.71436	16.2655	5.50586e-05	0.000106759
Acinar	ENSG00000134852	CLOCK	0.314209	4.50129	16.2506	5.54918e-05	0.000107587
Acinar	ENSG00000166268	MYRFL	1.54624	-0.777747	16.2364	5.59092e-05	0.000108346
Acinar	ENSG00000198300	PEG3	0.433819	5.0263	16.233	5.60092e-05	0.000108514
Acinar	ENSG00000186130	ZBTB6	0.476114	2.43368	16.18	5.75976e-05	0.000111501
Acinar	ENSG00000089335	ZNF302	-0.252745	4.68574	16.0877	6.04757e-05	0.000116788
Acinar	ENSG00000096401	CDC5L	0.28467	6.08393	15.9941	6.35414e-05	0.000122495
Acinar	ENSG00000180938	ZNF572	-0.728522	0.698849	15.9419	6.53152e-05	0.00012574
Acinar	ENSG00000196417	ZNF765	0.474461	3.18169	15.9149	6.62539e-05	0.000127503
Acinar	ENSG00000196323	ZBTB44	0.258544	5.05622	15.8675	6.7934e-05	0.000130555
Acinar	ENSG00000118217	ATF6	-0.281943	5.01965	15.8348	6.91203e-05	0.000132743
Acinar	ENSG00000138380	CARF	0.489286	3.06248	15.6233	7.72978e-05	0.000147681
Acinar	ENSG00000168874	ATOH8	0.804324	1.09955	15.5887	7.87249e-05	0.00015027
Acinar	ENSG00000165495	PKNOX2	-0.71983	1.85716	15.5753	7.92841e-05	0.000151268
Acinar	ENSG00000170949	ZNF160	-0.299127	4.06967	15.5711	7.94592e-05	0.00015155
Acinar	ENSG00000198551	ZNF627	0.357911	3.11221	15.5207	8.16057e-05	0.000155466
Acinar	ENSG00000187079	TEAD1	0.364036	4.88505	15.2646	9.34502e-05	0.00017714
Acinar	ENSG00000218891	ZNF579	0.313005	3.79153	15.2465	9.43494e-05	0.000178702
Acinar	ENSG00000118058	KMT2A	0.303427	6.38927	15.1634	9.8597e-05	0.000186408
Acinar	ENSG00000089775	ZBTB25	0.387079	2.64327	15.0983	0.000102056	0.000192599
Acinar	ENSG00000154832	CXXC1	-0.273583	4.317	15.089	0.000102562	0.000193464
Acinar	ENSG00000278318	ZNF229	-0.437653	2.03915	15.0043	0.000107268	0.000202022
Acinar	ENSG00000182983	ZNF662	-0.390693	2.75344	15.0023	0.000107383	0.000202215
Acinar	ENSG00000257923	CUX1	0.226702	5.19302	15.0019	0.000107405	0.000202234
Acinar	ENSG00000185129	PURA	0.26302	5.67115	14.9723	0.000109101	0.000205289
Acinar	ENSG00000106554	CHCHD3	-0.302211	5.18978	14.9334	0.000111373	0.000209374
Acinar	ENSG00000140009	ESR2	1.33834	-0.631064	14.8751	0.000114871	0.000215537
Acinar	ENSG00000121406	ZNF549	0.499504	2.05247	14.8746	0.000114902	0.000215572
Acinar	ENSG00000112365	ZBTB24	0.341152	3.27818	14.826	0.0001179	0.000221071
Acinar	ENSG00000105136	ZNF419	0.395596	2.40843	14.8054	0.000119193	0.000223295
Acinar	ENSG00000188786	MTF1	0.379531	3.17983	14.7882	0.000120289	0.00022522
Acinar	ENSG00000188290	HES4	0.836951	5.04267	14.764	0.000121839	0.000227994
Acinar	ENSG00000144026	ZNF514	0.328656	3.28154	14.6984	0.000126152	0.000235827
Acinar	ENSG00000100426	ZBED4	0.407713	3.17375	14.6904	0.000126691	0.000236782
Acinar	ENSG00000083814	ZNF671	0.558409	1.98935	14.6697	0.00012809	0.000239236
Acinar	ENSG00000186017	ZNF566	0.310662	3.41584	14.6605	0.000128718	0.000240373
Acinar	ENSG00000081386	ZNF510	0.360104	3.0036	14.5169	0.000138907	0.000258743
Acinar	ENSG00000164683	HEY1	0.661529	4.36114	14.4907	0.00014085	0.000262216
Acinar	ENSG00000170802	FOXN2	0.327159	3.01203	14.4781	0.0001418	0.000263835
Acinar	ENSG00000198182	ZNF607	0.457125	1.86429	14.4193	0.000146295	0.000271684
Acinar	ENSG00000151789	ZNF385D	0.925448	-0.0467372	14.4169	0.000146481	0.000272
Acinar	ENSG00000186951	PPARA	-0.279289	4.08369	14.3822	0.000149208	0.000276784
Acinar	ENSG00000018869	ZNF582	0.435612	2.21763	14.2397	0.000160936	0.00029758
Acinar	ENSG00000267508	ZNF285	0.613187	0.974365	14.2269	0.000162035	0.000299545
Acinar	ENSG00000101216	GMEB2	-0.495508	2.17069	14.2157	0.000163006	0.00030124
Acinar	ENSG00000166529	ZSCAN21	0.273607	3.14708	14.1975	0.000164587	0.000304024
Acinar	ENSG00000188295	ZNF669	0.37344	3.24588	14.1964	0.000164688	0.000304146
Acinar	ENSG00000127081	ZNF484	0.503481	2.28874	14.1954	0.000164775	0.000304273
Acinar	ENSG00000112511	PHF1	0.387789	3.34509	14.1946	0.000164841	0.000304361
Acinar	ENSG00000163435	ELF3	-0.724408	7.03762	14.183	0.000165859	0.000306173
Acinar	ENSG00000197008	ZNF138	0.270598	3.57908	14.1654	0.000167419	0.000308847
Acinar	ENSG00000075407	ZNF37A	0.355853	5.12187	14.1379	0.000169889	0.000313163
Acinar	ENSG00000169083	AR	1.41296	-0.0476338	14.1043	0.000172945	0.000318618
Acinar	ENSG00000275410	HNF1B	0.419224	4.23558	13.9996	0.000182851	0.000335827
Acinar	ENSG00000147862	NFIB	-0.446854	5.53601	13.994	0.000183395	0.00033679
Acinar	ENSG00000181220	ZNF746	0.34563	2.71428	13.9678	0.000185965	0.000341273
Acinar	ENSG00000185591	SP1	-0.331076	3.78532	13.929	0.000189848	0.000348181
Acinar	ENSG00000204946	ZNF783	0.446789	1.90456	13.821	0.000201076	0.000368083
Acinar	ENSG00000156853	ZNF689	-0.427926	3.61489	13.7993	0.000203413	0.000372156
Acinar	ENSG00000166454	ATMIN	0.269774	4.21814	13.7901	0.000204411	0.000373902
Acinar	ENSG00000189042	ZNF567	0.3394	3.39691	13.7348	0.000210514	0.000384516
Acinar	ENSG00000116539	ASH1L	0.307893	6.20445	13.6694	0.000217982	0.000397528
Acinar	ENSG00000105866	SP4	0.376216	3.30457	13.5081	0.000237539	0.00043062
Acinar	ENSG00000136169	SETDB2	-0.270893	3.69533	13.5016	0.000238364	0.000431995
Acinar	ENSG00000180479	ZNF571	0.403303	2.55455	13.4228	0.00024858	0.000449755
Acinar	ENSG00000215271	HOMEZ	-0.310676	3.1736	13.4204	0.0002489	0.000450284
Acinar	ENSG00000236104	ZBTB22	-0.45609	2.88889	13.3951	0.000252276	0.000456194
Acinar	ENSG00000064961	HMG20B	-0.299275	4.76851	13.394	0.000252432	0.000456426
Acinar	ENSG00000267680	ZNF224	0.3175	3.59405	13.3805	0.000254252	0.000459319
Acinar	ENSG00000188033	ZNF490	0.693753	0.950149	13.3678	0.000255983	0.000462296
Acinar	ENSG00000179361	ARID3B	-0.343746	2.51673	13.3113	0.000263806	0.000475547
Acinar	ENSG00000121864	ZNF639	-0.242259	4.39347	13.271	0.00026955	0.00048543
Acinar	ENSG00000167384	ZNF180	0.346205	2.61317	13.1798	0.000282983	0.00050851
Acinar	ENSG00000272602	ZNF595	-0.311831	2.93834	13.1677	0.000284818	0.000511543
Acinar	ENSG00000119950	MXI1	-0.284558	4.30235	13.1669	0.000284938	0.000511704
Acinar	ENSG00000144792	ZNF660	0.312841	3.26575	13.1566	0.000286507	0.000514354
Acinar	ENSG00000070444	MNT	0.268551	3.28675	13.1146	0.000293001	0.000525673
Acinar	ENSG00000198911	SREBF2	-0.294303	3.92079	13.022	0.000307851	0.000551069
Acinar	ENSG00000185947	ZNF267	-0.428394	3.06293	12.9992	0.000311624	0.000557224
Acinar	ENSG00000181450	ZNF678	0.358152	3.03282	12.9037	0.00032794	0.000584829
Acinar	ENSG00000178764	ZHX2	-0.449606	3.12801	12.8677	0.00033431	0.000595552
Acinar	ENSG00000128000	ZNF780B	0.339253	3.13465	12.8492	0.000337623	0.000600875
Acinar	ENSG00000130803	ZNF317	-0.350895	2.90601	12.8337	0.000340424	0.000605666
Acinar	ENSG00000220201	ZGLP1	0.629816	0.837903	12.8204	0.000342858	0.000609932
Acinar	ENSG00000256229	ZNF486	0.494113	1.58039	12.6299	0.00037962	0.000671886
Acinar	ENSG00000196812	ZSCAN16	0.34432	2.79677	12.6174	0.000382163	0.000676316
Acinar	ENSG00000236609	ZNF853	0.416911	3.06879	12.5833	0.000389201	0.00068826
Acinar	ENSG00000197134	ZNF257	-0.410387	1.48907	12.5604	0.000394017	0.00069648
Acinar	ENSG00000176160	HSF5	1.29692	-1.31973	12.314	0.000449571	0.000789736
Acinar	ENSG00000135625	EGR4	0.820402	4.70731	12.3113	0.000450222	0.000790712
Acinar	ENSG00000163795	ZNF513	0.372785	2.71827	12.1628	0.000487523	0.000851822
Acinar	ENSG00000221818	EBF2	1.32257	-0.652027	12.1295	0.000496311	0.000866179
Acinar	ENSG00000213347	MXD3	-0.640559	2.39087	12.066	0.000513488	0.000894657
Acinar	ENSG00000205903	ZNF316	0.425716	3.23045	12.0419	0.000520181	0.000905845
Acinar	ENSG00000177125	ZBTB34	0.409603	2.10029	11.8795	0.000567565	0.000983527
Acinar	ENSG00000076108	BAZ2A	0.259431	4.90412	11.8557	0.000574865	0.000995038
Acinar	ENSG00000142556	ZNF614	-0.279195	2.65196	11.7884	0.000595996	0.00103044
Acinar	ENSG00000186020	ZNF529	0.397352	3.08767	11.7791	0.000598979	0.00103538
Acinar	ENSG00000160961	ZNF333	0.431207	1.9557	11.5872	0.000664074	0.00114174
Acinar	ENSG00000112242	E2F3	-0.266048	3.04028	11.542	0.000680398	0.00116872
Acinar	ENSG00000196247	ZNF107	0.487096	2.7824	11.4662	0.000708742	0.00121465
Acinar	ENSG00000167637	ZNF283	0.33952	2.24554	11.4431	0.000717588	0.00122868
Acinar	ENSG00000072310	SREBF1	0.365876	3.56217	11.4276	0.000723601	0.00123846
Acinar	ENSG00000196345	ZKSCAN7	0.495679	2.28384	11.3918	0.00073768	0.00126036
Acinar	ENSG00000159592	GPBP1L1	-0.196477	5.08988	11.378	0.000743175	0.00126949
Acinar	ENSG00000229676	ZNF492	-0.534494	0.954211	11.3088	0.000771395	0.0013158
Acinar	ENSG00000196263	ZNF471	0.385925	2.45395	11.2955	0.000776954	0.00132474
Acinar	ENSG00000198556	ZNF789	0.361067	2.6896	11.262	0.000791104	0.0013479
Acinar	ENSG00000196693	ZNF33B	-0.208087	5.19826	11.2567	0.000793357	0.00135133
Acinar	ENSG00000095951	HIVEP1	-0.257675	3.55065	11.2551	0.000794055	0.00135224
Acinar	ENSG00000100811	YY1	-0.208646	6.29093	11.2286	0.000805476	0.00137085
Acinar	ENSG00000085274	MYNN	-0.296796	3.78673	11.2186	0.000809826	0.00137783
Acinar	ENSG00000173153	ESRRA	0.314886	3.56549	11.1414	0.000844211	0.00143399
Acinar	ENSG00000116044	NFE2L2	-0.309056	5.52499	11.1118	0.000857813	0.0014562
Acinar	ENSG00000140993	TIGD7	0.343135	1.98754	11.0861	0.000869794	0.00147534
Acinar	ENSG00000172845	SP3	-0.200819	4.85771	10.989	0.000916522	0.00155128
Acinar	ENSG00000213988	ZNF90	-0.456364	2.4903	10.9388	0.000941693	0.00159146
Acinar	ENSG00000187187	ZNF546	0.414092	1.90947	10.9334	0.000944476	0.001596
Acinar	ENSG00000130940	CASZ1	0.606763	2.36228	10.8857	0.000969076	0.00163541
Acinar	ENSG00000125798	FOXA2	0.237953	5.75194	10.8851	0.000969427	0.00163576
Acinar	ENSG00000275004	ZNF280B	0.333899	2.49284	10.885	0.000969478	0.00163576
Acinar	ENSG00000106948	AKNA	0.53882	0.846044	10.821	0.00100357	0.00169088
Acinar	ENSG00000158691	ZSCAN12	0.386941	2.45224	10.8211	0.00100349	0.00169088
Acinar	ENSG00000169057	MECP2	0.212139	5.0319	10.6833	0.00108104	0.00181408
Acinar	ENSG00000171448	ZBTB26	0.36329	1.95649	10.5588	0.00115636	0.00193481
Acinar	ENSG00000171649	ZIK1	0.424787	1.82535	10.5425	0.00116663	0.00195141
Acinar	ENSG00000186496	ZNF396	-0.358607	1.61408	10.421	0.00124587	0.00207916
Acinar	ENSG00000172273	HINFP	-0.306814	2.91288	10.3866	0.0012693	0.00211656
Acinar	ENSG00000269699	ZIM2	0.870843	0.514197	10.3778	0.00127539	0.00212565
Acinar	ENSG00000151702	FLI1	0.979699	-0.151974	10.3163	0.00131857	0.00219367
Acinar	ENSG00000121903	ZSCAN20	0.531433	0.41304	10.2653	0.00135554	0.00225315
Acinar	ENSG00000196453	ZNF777	-0.429043	1.9322	10.1394	0.00145137	0.00240451
Acinar	ENSG00000181894	ZNF329	0.266319	2.60118	10.107	0.0014771	0.00244447
Acinar	ENSG00000114861	FOXP1	0.224313	6.31521	10.073	0.00150459	0.00248773
Acinar	ENSG00000186416	NKRF	0.384562	2.6889	10.0675	0.00150907	0.00249465
Acinar	ENSG00000213928	IRF9	-0.542133	1.56679	10.0577	0.00151713	0.00250698
Acinar	ENSG00000196646	ZNF136	0.273064	3.31619	9.9733	0.00158827	0.00261752
Acinar	ENSG00000196843	ARID5A	-0.715383	2.26936	9.84571	0.00170228	0.00279877
Acinar	ENSG00000180626	ZNF594	0.413056	2.50464	9.80919	0.00173642	0.00285209
Acinar	ENSG00000215421	ZNF407	0.29894	3.48378	9.72481	0.00181797	0.00297869
Acinar	ENSG00000178935	ZNF552	0.322169	3.14587	9.62189	0.00192272	0.00314045
Acinar	ENSG00000213799	ZNF845	-0.388774	1.24589	9.50251	0.00205191	0.00333934
Acinar	ENSG00000197128	ZNF772	0.433782	1.8296	9.49036	0.00206554	0.00335989
Acinar	ENSG00000111206	FOXM1	-0.556579	1.23555	9.48267	0.00207422	0.00337367
Acinar	ENSG00000169957	ZNF768	-0.230509	3.52094	9.43383	0.00213019	0.00345998
Acinar	ENSG00000170325	PRDM10	0.464503	1.44023	9.42571	0.00213964	0.00347465
Acinar	ENSG00000187815	ZFP69	0.612797	0.343167	9.41372	0.00215368	0.00349541
Acinar	ENSG00000070476	ZXDC	-0.239554	3.29293	9.39595	0.00217465	0.00352772
Acinar	ENSG00000165244	ZNF367	-0.621474	0.53276	9.39138	0.00218008	0.00353618
Acinar	ENSG00000124151	NCOA3	-0.220197	4.34462	9.35452	0.00222436	0.00360379
Acinar	ENSG00000234444	ZNF736	0.303226	2.77682	9.35048	0.00222927	0.00361105
Acinar	ENSG00000010244	ZNF207	-0.255058	6.44275	9.29244	0.00230101	0.00372219
Acinar	ENSG00000140396	NCOA2	0.256125	4.04028	9.22391	0.00238875	0.00385551
Acinar	ENSG00000159915	ZNF233	-0.357524	1.68623	9.19034	0.00243295	0.00392487
Acinar	ENSG00000257591	ZNF625	0.381244	2.33437	9.05445	0.00262056	0.00420846
Acinar	ENSG00000245680	ZNF585B	0.374884	1.95892	9.03726	0.00264532	0.00424659
Acinar	ENSG00000118260	CREB1	0.165551	5.26891	8.86503	0.00290685	0.00464182
Acinar	ENSG00000168795	ZBTB5	-0.368002	2.79453	8.82632	0.00296917	0.00473635
Acinar	ENSG00000184481	FOXO4	-0.424038	1.68279	8.80905	0.0029974	0.00478045
Acinar	ENSG00000205250	E2F4	-0.228282	3.77284	8.75529	0.00308705	0.00491686
Acinar	ENSG00000197054	ZNF763	0.542713	0.971076	8.60497	0.00335247	0.00531925
Acinar	ENSG00000116731	PRDM2	0.249025	4.97864	8.57111	0.00341538	0.00541495
Acinar	ENSG00000172888	ZNF621	0.319331	3.35854	8.5648	0.00342724	0.00543324
Acinar	ENSG00000056277	ZNF280C	0.368367	1.9204	8.53407	0.00348559	0.00551943
Acinar	ENSG00000176407	KCMF1	-0.206235	4.87514	8.45002	0.00365039	0.00576287
Acinar	ENSG00000139793	MBNL2	-0.240768	4.90019	8.41701	0.00371727	0.00586178
Acinar	ENSG00000139515	PDX1	-0.181843	6.13288	8.41251	0.00372647	0.00587574
Acinar	ENSG00000256223	ZNF10	0.305116	3.39268	8.40402	0.00374392	0.00590101
Acinar	ENSG00000198464	ZNF480	0.23511	3.75896	8.39807	0.0037562	0.00591869
Acinar	ENSG00000177683	THAP5	-0.166228	4.80334	8.34959	0.00385774	0.00607064
Acinar	ENSG00000177873	ZNF619	-0.433854	1.08374	8.19713	0.00419567	0.00656953
Acinar	ENSG00000078900	TP73	-0.883065	0.0391536	8.17372	0.00425015	0.0066486
Acinar	ENSG00000186777	ZNF732	-0.857836	-0.468818	8.13276	0.00434726	0.00678722
Acinar	ENSG00000105732	ZNF574	-0.218422	2.63243	8.12571	0.00436419	0.00681227
Acinar	ENSG00000143190	POU2F1	0.230714	4.13799	8.07615	0.00448517	0.0069926
Acinar	ENSG00000118689	FOXO3	-0.330965	5.21527	7.9995	0.00467903	0.00727985
Acinar	ENSG00000167625	ZNF526	-0.298319	2.42649	7.97884	0.00473273	0.00735996
Acinar	ENSG00000104221	BRF2	-0.196366	3.55075	7.96524	0.00476841	0.00741199
Acinar	ENSG00000173041	ZNF680	-0.259812	3.47197	7.93054	0.00486074	0.00754846
Acinar	ENSG00000121297	TSHZ3	0.500556	1.67862	7.87312	0.0050175	0.00777957
Acinar	ENSG00000129535	NRL	0.601475	0.737309	7.85872	0.00505761	0.00783811
Acinar	ENSG00000119919	NKX2-3	-1.48035	-1.25163	7.85692	0.00506265	0.00784521
Acinar	ENSG00000131061	ZNF341	0.607313	0.337938	7.84685	0.00509093	0.00788682
Acinar	ENSG00000180855	ZNF443	0.351632	1.79569	7.81643	0.00517733	0.00800875
Acinar	ENSG00000182903	ZNF721	0.184717	4.99602	7.80699	0.00520445	0.00804847
Acinar	ENSG00000184271	POU6F1	0.973377	-0.557604	7.74697	0.00538026	0.0083034
Acinar	ENSG00000203883	SOX18	-0.75486	-0.526651	7.70481	0.00550738	0.00848778
Acinar	ENSG00000179886	TIGD5	0.238781	2.8051	7.67775	0.00559059	0.00860329
Acinar	ENSG00000197016	ZNF470	0.356456	1.72295	7.64221	0.00570179	0.00876227
Acinar	ENSG00000104885	DOT1L	0.236368	3.0394	7.62536	0.00575533	0.00884048
Acinar	ENSG00000196214	ZNF766	0.202085	4.0702	7.59964	0.005838	0.00895837
Acinar	ENSG00000277462	ZNF670	-0.306916	2.17075	7.59763	0.00584452	0.00896755
Acinar	ENSG00000144747	TMF1	-0.200896	5.93171	7.55926	0.00597026	0.00914953
Acinar	ENSG00000164736	SOX17	-1.01158	-1.31337	7.47761	0.00624708	0.0095475
Acinar	ENSG00000124920	MYRF	-0.249146	2.79812	7.42904	0.00641797	0.00979062
Acinar	ENSG00000141568	FOXK2	0.202205	3.73608	7.32732	0.00679142	0.0103225
Acinar	ENSG00000147180	ZNF711	-0.211352	4.32124	7.29417	0.00691786	0.0105035
Acinar	ENSG00000189190	ZNF600	-0.451859	1.5113	7.26608	0.0070269	0.0106581
Acinar	ENSG00000172262	ZNF131	-0.202985	5.0608	7.18445	0.00735383	0.0111316
Acinar	ENSG00000123411	IKZF4	0.4512	2.76938	7.14134	0.00753267	0.0113858
Acinar	ENSG00000123933	MXD4	0.196462	5.40062	7.12178	0.0076153	0.0115076
Acinar	ENSG00000129194	SOX15	0.53962	1.18969	7.11502	0.00764406	0.0115489
Acinar	ENSG00000072736	NFATC3	-0.211281	4.61578	7.08361	0.00777923	0.0117393
Acinar	ENSG00000177485	ZBTB33	0.247502	2.9541	7.06778	0.00784826	0.011836
Acinar	ENSG00000187987	ZSCAN23	0.627205	0.747275	7.0643	0.00786351	0.0118579
Acinar	ENSG00000071564	TCF3	-0.208138	4.54607	7.03774	0.00798098	0.0120231
Acinar	ENSG00000125482	TTF1	0.184264	4.35498	7.02097	0.00805607	0.0121263
Acinar	ENSG00000196092	PAX5	1.51961	-1.52162	7.01841	0.00806759	0.0121426
Acinar	ENSG00000083817	ZNF416	0.504763	1.08112	6.9972	0.00816374	0.0122762
Acinar	ENSG00000249459	ZNF286B	0.401385	0.949792	6.89559	0.00864085	0.0129481
Acinar	ENSG00000198816	ZNF358	-0.251713	4.28358	6.88407	0.00869673	0.0130259
Acinar	ENSG00000185420	SMYD3	-0.409066	4.1963	6.87755	0.00872853	0.0130689
Acinar	ENSG00000197024	ZNF398	0.231506	2.9208	6.86394	0.00879523	0.0131598
Acinar	ENSG00000165891	E2F7	-0.634677	0.186799	6.83345	0.00894665	0.013375
Acinar	ENSG00000196418	ZNF124	0.299259	2.64529	6.74472	0.00940258	0.0140176
Acinar	ENSG00000010803	SCMH1	-0.193963	3.44993	6.72039	0.00953168	0.0142012
Acinar	ENSG00000188785	ZNF548	-0.305128	3.05476	6.71095	0.00958229	0.0142715
Acinar	ENSG00000181444	ZNF467	0.304817	2.86179	6.69653	0.00966006	0.014377
Acinar	ENSG00000108813	DLX4	-1.18582	-0.793561	6.68557	0.00971967	0.0144619
Acinar	ENSG00000197566	ZNF624	0.344145	2.27818	6.65665	0.00987866	0.0146866
Acinar	ENSG00000168769	TET2	0.208344	4.66146	6.64104	0.00996557	0.0148041
Acinar	ENSG00000165804	ZNF219	-0.272574	3.22505	6.5708	0.0103665	0.0153612
Acinar	ENSG00000133250	ZNF414	0.222868	3.27583	6.56649	0.0103917	0.0153944
Acinar	ENSG00000197037	ZSCAN25	-0.307889	2.04607	6.54375	0.0105253	0.0155716
Acinar	ENSG00000080603	SRCAP	-0.38379	1.09755	6.53662	0.0105676	0.0156286
Acinar	ENSG00000213973	ZNF99	0.797659	0.0277088	6.49038	0.010846	0.0160119
Acinar	ENSG00000163516	ANKZF1	0.177744	4.00731	6.48571	0.0108745	0.0160511
Acinar	ENSG00000160229	ZNF66	0.337399	1.7953	6.47171	0.0109605	0.0161666
Acinar	ENSG00000167840	ZNF232	0.287939	2.62904	6.45553	0.0110608	0.0162958
Acinar	ENSG00000204859	ZBTB48	-0.22652	3.27519	6.45278	0.0110779	0.0163152
Acinar	ENSG00000119725	ZNF410	-0.479534	0.721652	6.40296	0.011393	0.0167541
Acinar	ENSG00000263002	ZNF234	0.24603	2.64722	6.36986	0.0116075	0.0170545
Acinar	ENSG00000178229	ZNF543	0.239091	2.37551	6.36852	0.0116163	0.0170644
Acinar	ENSG00000179195	ZNF664	-0.182647	5.18186	6.35273	0.0117201	0.0172108
Acinar	ENSG00000126464	PRR12	0.227293	3.09619	6.35228	0.011723	0.0172136
Acinar	ENSG00000007968	E2F2	-0.761632	-0.342706	6.31469	0.0119742	0.0175576
Acinar	ENSG00000175550	DRAP1	0.163085	6.53909	6.27451	0.0122487	0.0179428
Acinar	ENSG00000181666	HKR1	0.193826	3.59635	6.2712	0.0122716	0.0179685
Acinar	ENSG00000179922	ZNF784	-0.379263	2.15326	6.2685	0.0122903	0.0179914
Acinar	ENSG00000198795	ZNF521	0.924153	0.967918	6.14727	0.0131615	0.0191955
Acinar	ENSG00000189298	ZKSCAN3	-0.282861	1.71976	6.10035	0.0135155	0.0196774
Acinar	ENSG00000167981	ZNF597	-0.335132	1.14693	6.06563	0.0137837	0.0200556
Acinar	ENSG00000067646	ZFY	-0.214028	2.78592	6.05216	0.0138893	0.0202005
Acinar	ENSG00000001167	NFYA	-0.289622	2.95158	6.0417	0.0139718	0.0203098
Acinar	ENSG00000163666	HESX1	-0.562307	-0.335753	5.95401	0.0146839	0.021278
Acinar	ENSG00000166188	ZNF319	-0.343182	1.40467	5.93452	0.0148471	0.0214996
Acinar	ENSG00000066827	ZFAT	0.28508	1.23786	5.83995	0.0156663	0.0226209
Acinar	ENSG00000164330	EBF1	0.501415	0.449578	5.7845	0.0161681	0.0233011
Acinar	ENSG00000118620	ZNF430	0.19186	4.14393	5.75823	0.0164116	0.0236335
Acinar	ENSG00000102349	KLF8	0.745086	-0.822386	5.73593	0.0166213	0.0239149
Acinar	ENSG00000065029	ZNF76	0.216857	3.47157	5.6732	0.017226	0.0247487
Acinar	ENSG00000174282	ZBTB4	0.172391	3.71663	5.60081	0.0179522	0.0257342
Acinar	ENSG00000269067	ZNF728	-0.749967	-0.887955	5.5662	0.0183105	0.0262163
Acinar	ENSG00000185630	PBX1	-0.162107	6.59754	5.56546	0.0183182	0.0262228
Acinar	ENSG00000169740	ZNF32	0.186784	5.14541	5.563	0.018344	0.0262575
Acinar	ENSG00000115568	ZNF142	0.326434	1.77984	5.56251	0.0183491	0.0262625
Acinar	ENSG00000129028	THAP10	0.423003	1.2636	5.55524	0.0184255	0.0263651
Acinar	ENSG00000100105	PATZ1	0.16777	4.16012	5.52861	0.018708	0.026744
Acinar	ENSG00000151623	NR3C2	-0.269308	1.90689	5.51125	0.0188945	0.0269991
Acinar	ENSG00000131931	THAP1	0.175127	3.76262	5.50356	0.0189777	0.0271111
Acinar	ENSG00000198429	ZNF69	-0.365768	2.41721	5.46982	0.0193477	0.0276111
Acinar	ENSG00000083812	ZNF324	0.238874	2.97577	5.41109	0.0200092	0.0285064
Acinar	ENSG00000122386	ZNF205	-0.199951	3.57184	5.40535	0.0200751	0.0285905
Acinar	ENSG00000147124	ZNF41	0.413746	1.04727	5.34835	0.0207419	0.0295048
Acinar	ENSG00000177946	CENPBD1	0.229432	3.05849	5.25659	0.0218638	0.0310028
Acinar	ENSG00000162702	ZNF281	0.157576	5.19476	5.17227	0.0229503	0.0324549
Acinar	ENSG00000105708	ZNF14	0.262142	2.64017	5.14829	0.0232692	0.0328753
Acinar	ENSG00000135100	HNF1A	0.274409	2.59755	5.1474	0.0232812	0.032889
Acinar	ENSG00000178163	ZNF518B	0.254577	3.47811	5.06356	0.024434	0.0344245
Acinar	ENSG00000100644	HIF1A	0.137599	5.61582	4.96759	0.0258267	0.036261
Acinar	ENSG00000102901	CENPT	-0.146509	3.86084	4.94314	0.0261944	0.0367308
Acinar	ENSG00000187792	ZNF70	-0.368014	1.57515	4.93591	0.0263042	0.036863
Acinar	ENSG00000198546	ZNF511	-0.192174	4.70203	4.9124	0.0266645	0.0373366
Acinar	ENSG00000196172	ZNF681	0.243089	2.92771	4.90698	0.0267484	0.0374509
Acinar	ENSG00000178338	ZNF354B	0.206039	2.87597	4.85787	0.0275202	0.0384572
Acinar	ENSG00000171940	ZNF217	-0.256731	3.61228	4.83155	0.0279435	0.0390061
Acinar	ENSG00000169955	ZNF747	-0.238889	2.7921	4.78862	0.0286484	0.0399165
Acinar	ENSG00000159140	SON	0.15952	7.79648	4.7884	0.028652	0.0399182
Acinar	ENSG00000176399	DMRTA1	-0.328513	2.36808	4.7322	0.0296031	0.0411675
Acinar	ENSG00000197483	ZNF628	-0.364048	1.63359	4.71308	0.0299341	0.0416
Acinar	ENSG00000204366	ZBTB12	0.614858	-0.0738592	4.69096	0.0303217	0.0421072
Acinar	ENSG00000198185	ZNF334	0.171145	3.59299	4.67218	0.0306551	0.0425453
Acinar	ENSG00000197050	ZNF420	0.211714	3.38551	4.6714	0.0306689	0.0425609
Acinar	ENSG00000179965	ZNF771	-0.248678	2.74579	4.6638	0.030805	0.0427427
Acinar	ENSG00000131759	RARA	-0.192342	2.97728	4.63542	0.0313185	0.0434082
Acinar	ENSG00000126746	ZNF384	-0.219181	2.33796	4.60065	0.0319599	0.0442309
Acinar	ENSG00000272333	KMT2B	0.188617	4.40695	4.58803	0.032196	0.0445391
Acinar	ENSG00000174428	GTF2IRD2B	0.28562	2.47485	4.55544	0.0328144	0.0453362
Acinar	ENSG00000130844	ZNF331	-0.205152	5.05145	4.55481	0.0328265	0.0453436
Acinar	ENSG00000135164	DMTF1	0.146969	4.46744	4.49359	0.0340221	0.046894
Acinar	ENSG00000106571	GLI3	0.739289	-0.177269	4.48635	0.0341666	0.0470738
Acinar	ENSG00000114126	TFDP2	0.125087	5.69254	4.47319	0.0344307	0.0474101
Acinar	ENSG00000188313	PLSCR1	-0.209278	4.2937	4.40323	0.035871	0.049316
Alpha	ENSG00000170549	IRX1	-7.37554	4.20236	2131.24	0	0
Alpha	ENSG00000170561	IRX2	-6.29566	7.33314	1396.92	9.83289e-306	1.4432e-302
Alpha	ENSG00000152804	HHEX	5.22601	5.35474	1207.01	1.83181e-264	1.84841e-261
Alpha	ENSG00000114315	HES1	4.1128	6.61389	1091.17	2.74712e-239	2.01601e-236
Alpha	ENSG00000084093	REST	4.01793	4.98845	955.881	6.98877e-210	3.4192e-207
Alpha	ENSG00000168267	PTF1A	5.68464	4.97515	945.483	1.27233e-207	5.86907e-205
Alpha	ENSG00000169856	ONECUT1	6.21977	4.84926	904.387	1.09156e-198	4.76304e-196
Alpha	ENSG00000060138	YBX3	3.10793	6.55557	766.872	8.60794e-169	2.31625e-166
Alpha	ENSG00000136997	MYC	4.34687	4.7707	756.522	1.53247e-166	3.86589e-164
Alpha	ENSG00000188290	HES4	3.89953	4.94733	752.077	1.41829e-165	3.46943e-163
Alpha	ENSG00000116833	NR5A2	4.47454	5.18221	739.691	6.99894e-163	1.56941e-160
Alpha	ENSG00000124232	RBPJL	4.77296	6.28623	723.568	2.24253e-159	4.7639e-157
Alpha	ENSG00000177426	TGIF1	4.70554	4.55791	714.573	2.02623e-157	4.19403e-155
Alpha	ENSG00000188981	MSANTD1	-3.09993	1.73588	700.638	2.17299e-154	4.22686e-152
Alpha	ENSG00000125398	SOX9	3.65079	5.55708	680.46	5.30719e-150	9.52051e-148
Alpha	ENSG00000004848	ARX	-4.03207	6.21857	611.396	5.5604e-135	7.73902e-133
Alpha	ENSG00000139515	PDX1	2.48519	5.80939	607.936	3.14592e-134	4.26813e-132
Alpha	ENSG00000082175	PGR	-4.88247	0.652307	602.912	3.89458e-133	5.23984e-131
Alpha	ENSG00000149948	HMGA2	3.67876	4.95163	592.294	7.942e-131	1.02579e-128
Alpha	ENSG00000135374	ELF5	3.98118	4.53167	575.155	4.24692e-127	4.89761e-125
Alpha	ENSG00000168214	RBPJ	3.36977	8.86936	562.011	3.06988e-124	3.26074e-122
Alpha	ENSG00000074219	TEAD2	4.20332	3.96455	534.305	3.26817e-118	3.1038e-116
Alpha	ENSG00000221869	CEBPD	3.19396	5.62556	523.947	5.859e-116	5.40535e-114
Alpha	ENSG00000144331	ZNF385B	5.36242	3.73225	499.244	1.38794e-110	1.12605e-108
Alpha	ENSG00000164684	ZNF704	1.97699	5.44625	470.299	2.75883e-104	2.01544e-102
Alpha	ENSG00000166949	SMAD3	3.74516	3.63055	450.439	5.78779e-100	3.94278e-98
Alpha	ENSG00000085276	MECOM	3.01439	3.65258	414.788	3.32531e-92	2.05698e-90
Alpha	ENSG00000119508	NR4A3	2.93479	4.42186	411.361	1.85323e-91	1.12483e-89
Alpha	ENSG00000157557	ETS2	2.72714	3.67782	398.639	1.08956e-88	6.35052e-87
Alpha	ENSG00000109787	KLF3	1.79766	5.43803	383.971	1.69958e-85	9.23897e-84
Alpha	ENSG00000182759	MAFA	2.1361	4.6612	381.184	6.87417e-85	3.71182e-83
Alpha	ENSG00000163497	FEV	-2.88046	4.98886	379.867	1.3305e-84	7.11288e-83
Alpha	ENSG00000172818	OVOL1	5.72916	3.43261	375.311	1.30603e-83	6.8908e-82
Alpha	ENSG00000122877	EGR2	2.4531	4.03835	372.567	5.16798e-83	2.69152e-81
Alpha	ENSG00000185022	MAFF	3.36475	5.74284	372.533	5.25624e-83	2.72868e-81
Alpha	ENSG00000165655	ZNF503	2.65268	5.52486	367.717	5.87874e-82	2.97531e-80
Alpha	ENSG00000118707	TGIF2	2.52479	3.99625	339.015	1.04572e-75	4.66384e-74
Alpha	ENSG00000116016	EPAS1	2.32688	3.91835	338.916	1.09893e-75	4.88766e-74
Alpha	ENSG00000178662	CSRNP3	-1.3688	5.40802	334.944	8.05528e-75	3.55335e-73
Alpha	ENSG00000136574	GATA4	4.59926	2.92884	326.166	6.57486e-73	2.80082e-71
Alpha	ENSG00000185002	RFX6	-1.97041	5.56357	323.72	2.24168e-72	9.40049e-71
Alpha	ENSG00000152284	TCF7L1	3.21537	3.85734	295.45	3.22868e-66	1.16355e-64
Alpha	ENSG00000148737	TCF7L2	1.75718	5.07557	286.271	3.22943e-64	1.10934e-62
Alpha	ENSG00000134532	SOX5	-1.75428	4.05732	284.669	7.21313e-64	2.46207e-62
Alpha	ENSG00000196482	ESRRG	-2.53429	3.12341	269.601	1.38658e-60	4.41544e-59
Alpha	ENSG00000106536	POU6F2	-2.40755	3.26053	267.978	3.13112e-60	9.85418e-59
Alpha	ENSG00000170485	NPAS2	2.90289	3.65695	262.408	5.12361e-59	1.57563e-57
Alpha	ENSG00000083307	GRHL2	3.90085	2.86634	261.022	1.02721e-58	3.11736e-57
Alpha	ENSG00000172216	CEBPB	2.62409	5.18186	259.204	2.55813e-58	7.66253e-57
Alpha	ENSG00000181444	ZNF467	-1.53882	3.37401	240.737	2.71701e-54	7.22672e-53
Alpha	ENSG00000125740	FOSB	2.1498	7.85168	235.155	4.47948e-53	1.15714e-51
Alpha	ENSG00000163435	ELF3	1.79221	6.69884	233.234	1.17486e-52	3.00129e-51
Alpha	ENSG00000163909	HEYL	4.4603	2.69467	224.969	7.45573e-51	1.84338e-49
Alpha	ENSG00000177045	SIX5	2.95361	3.01441	224.59	9.02023e-51	2.22338e-49
Alpha	ENSG00000147488	ST18	-1.62516	5.2786	224.363	1.0109e-50	2.48795e-49
Alpha	ENSG00000067066	SP100	2.09028	3.5369	219.813	9.93738e-50	2.3804e-48
Alpha	ENSG00000168772	CXXC4	-0.898599	6.24367	214.863	1.19392e-48	2.77751e-47
Alpha	ENSG00000075426	FOSL2	2.58614	3.50058	212.59	3.73889e-48	8.5502e-47
Alpha	ENSG00000016082	ISL1	-2.07338	8.49244	206.427	8.26668e-47	1.82081e-45
Alpha	ENSG00000276644	DACH1	-1.51194	5.19934	192.444	9.30661e-44	1.88526e-42
Alpha	ENSG00000077150	NFKB2	1.76484	3.36115	190.233	2.82782e-43	5.62949e-42
Alpha	ENSG00000142611	PRDM16	2.21948	3.55683	185.808	2.6149e-42	5.06814e-41
Alpha	ENSG00000155090	KLF10	1.35039	5.44118	185.027	3.8709e-42	7.45772e-41
Alpha	ENSG00000101057	MYBL2	3.5923	2.21759	180.888	3.10156e-41	5.82263e-40
Alpha	ENSG00000127445	PIN1	-0.926025	7.06625	179.968	4.92468e-41	9.17793e-40
Alpha	ENSG00000007372	PAX6	-1.6074	8.08229	178.069	1.27974e-40	2.33992e-39
Alpha	ENSG00000147862	NFIB	1.43957	5.37019	177.589	1.62888e-40	2.9682e-39
Alpha	ENSG00000102554	KLF5	1.49967	3.57271	175.935	3.74097e-40	6.74838e-39
Alpha	ENSG00000113916	BCL6	2.60857	2.73159	173.295	1.41093e-39	2.48412e-38
Alpha	ENSG00000197905	TEAD4	5.0758	1.91867	171.533	3.42331e-39	5.93019e-38
Alpha	ENSG00000105698	USF2	-0.861821	5.61844	169.732	8.46681e-39	1.44806e-37
Alpha	ENSG00000050344	NFE2L3	3.39989	2.84752	169.443	9.78976e-39	1.6655e-37
Alpha	ENSG00000111269	CREBL2	-1.12844	4.02233	164.154	1.39977e-37	2.27815e-36
Alpha	ENSG00000183779	ZNF703	-1.45493	2.90627	163.477	1.96749e-37	3.19891e-36
Alpha	ENSG00000123095	BHLHE41	3.95816	1.89958	159.765	1.27325e-36	2.01141e-35
Alpha	ENSG00000171604	CXXC5	0.865307	6.20002	159.188	1.70278e-36	2.67686e-35
Alpha	ENSG00000204103	MAFB	-1.85251	8.65929	156.787	5.69845e-36	8.79556e-35
Alpha	ENSG00000007866	TEAD3	2.63597	2.72439	156.232	7.53182e-36	1.15701e-34
Alpha	ENSG00000136826	KLF4	1.88254	2.91116	156.006	8.44071e-36	1.29293e-34
Alpha	ENSG00000138378	STAT4	-2.29747	1.29106	153.073	3.69322e-35	5.5467e-34
Alpha	ENSG00000123358	NR4A1	1.97354	6.7742	151.798	7.01451e-35	1.0486e-33
Alpha	ENSG00000176399	DMRTA1	2.68058	2.27841	150.847	1.132e-34	1.6798e-33
Alpha	ENSG00000100219	XBP1	1.76745	7.55808	149.003	2.8634e-34	4.1536e-33
Alpha	ENSG00000162992	NEUROD1	-1.25024	8.27973	143.723	4.08512e-33	5.67592e-32
Alpha	ENSG00000011332	DPF1	-2.06997	0.792802	140.032	2.61992e-32	3.5426e-31
Alpha	ENSG00000106546	AHR	1.95307	3.51083	139.349	3.69399e-32	4.94842e-31
Alpha	ENSG00000071564	TCF3	1.16206	4.43392	139.221	3.93975e-32	5.26986e-31
Alpha	ENSG00000106331	PAX4	2.03995	3.1426	138.462	5.77517e-32	7.69308e-31
Alpha	ENSG00000009950	MLXIPL	-1.32225	5.55568	137.554	9.12155e-32	1.20513e-30
Alpha	ENSG00000162772	ATF3	3.30026	8.47635	137.539	9.1934e-32	1.21363e-30
Alpha	ENSG00000140836	ZFHX3	0.952761	5.41567	137.352	1.0101e-31	1.32801e-30
Alpha	ENSG00000153814	JAZF1	-1.21242	3.63736	135.847	2.1548e-31	2.79432e-30
Alpha	ENSG00000150907	FOXO1	-1.05494	5.26436	133.645	6.53306e-31	8.28564e-30
Alpha	ENSG00000177888	ZBTB41	-0.961684	4.64743	133.482	7.0909e-31	8.97199e-30
Alpha	ENSG00000124766	SOX4	1.61684	8.0144	132.939	9.32279e-31	1.17499e-29
Alpha	ENSG00000090447	TFAP4	1.57457	3.93576	129.828	4.4682e-30	5.46922e-29
Alpha	ENSG00000164683	HEY1	1.83154	4.39299	124.271	7.34967e-29	8.47574e-28
Alpha	ENSG00000053254	FOXN3	-0.710554	4.7105	121.467	3.01933e-28	3.39701e-27
Alpha	ENSG00000134107	BHLHE40	3.41918	1.89596	116.641	3.43985e-27	3.73229e-26
Alpha	ENSG00000173258	ZNF483	-1.01546	3.65049	110.327	8.3087e-26	8.45268e-25
Alpha	ENSG00000105722	ERF	1.18543	3.81756	109.381	1.33895e-25	1.35362e-24
Alpha	ENSG00000162599	NFIA	1.56826	4.84723	107.826	2.93386e-25	2.92752e-24
Alpha	ENSG00000179627	ZBTB42	2.60754	1.95212	107.774	3.01276e-25	3.00068e-24
Alpha	ENSG00000169297	NR0B1	-2.34842	2.25748	106.842	4.8211e-25	4.76072e-24
Alpha	ENSG00000177606	JUN	1.87157	10.3921	106.802	4.91847e-25	4.85383e-24
Alpha	ENSG00000165495	PKNOX2	3.3847	1.72829	103.873	2.1574e-24	2.07205e-23
Alpha	ENSG00000117139	KDM5B	0.641801	5.99956	101.699	6.46226e-24	6.07648e-23
Alpha	ENSG00000162676	GFI1	6.44106	0.844928	101.652	6.61861e-24	6.21626e-23
Alpha	ENSG00000143578	CREB3L4	1.28826	3.50255	101.075	8.85627e-24	8.265e-23
Alpha	ENSG00000130675	MNX1	0.997844	5.52238	100.264	1.33378e-23	1.23616e-22
Alpha	ENSG00000198517	MAFK	1.68235	3.03937	99.9377	1.5727e-23	1.45508e-22
Alpha	ENSG00000068305	MEF2A	-0.694253	5.24256	98.4215	3.38165e-23	3.0776e-22
Alpha	ENSG00000120738	EGR1	1.27933	8.24793	98.2154	3.75269e-23	3.40952e-22
Alpha	ENSG00000137309	HMGA1	0.921752	5.63537	98.0577	4.06359e-23	3.68577e-22
Alpha	ENSG00000119138	KLF9	3.23882	1.0711	97.3243	5.88549e-23	5.28483e-22
Alpha	ENSG00000067082	KLF6	1.895	7.35669	96.4803	9.01368e-23	8.00913e-22
Alpha	ENSG00000156273	BACH1	0.87854	4.56879	96.3205	9.77146e-23	8.66338e-22
Alpha	ENSG00000127152	BCL11B	2.66105	2.59381	95.1955	1.7248e-22	1.50931e-21
Alpha	ENSG00000165556	CDX2	3.53	1.4634	94.9852	1.91813e-22	1.67125e-21
Alpha	ENSG00000141510	TP53	1.23636	3.41471	93.7946	3.50023e-22	3.01554e-21
Alpha	ENSG00000165030	NFIL3	1.46475	4.50776	93.2451	4.6203e-22	3.96149e-21
Alpha	ENSG00000157613	CREB3L1	5.62759	1.07659	92.2962	7.46267e-22	6.32466e-21
Alpha	ENSG00000087903	RFX2	-0.977598	3.10104	91.8305	9.44291e-22	7.96946e-21
Alpha	ENSG00000214717	ZBED1	0.74871	4.88288	91.3046	1.23174e-21	1.03092e-20
Alpha	ENSG00000125347	IRF1	1.86172	5.67926	90.7627	1.61982e-21	1.34319e-20
Alpha	ENSG00000162924	REL	0.872505	5.78385	86.3845	1.4814e-20	1.16783e-19
Alpha	ENSG00000131116	ZNF428	-0.587483	7.04972	86.33	1.52282e-20	1.19698e-19
Alpha	ENSG00000152467	ZSCAN1	-0.982577	2.51942	86.0003	1.79908e-20	1.40932e-19
Alpha	ENSG00000125520	SLC2A4RG	0.816203	5.13827	85.1085	2.8244e-20	2.18495e-19
Alpha	ENSG00000275410	HNF1B	1.43172	4.16767	84.9732	3.02441e-20	2.33521e-19
Alpha	ENSG00000178177	LCORL	-0.606065	5.66367	84.4158	4.00933e-20	3.08388e-19
Alpha	ENSG00000140262	TCF12	1.4454	5.46498	82.6143	9.97328e-20	7.4997e-19
Alpha	ENSG00000102935	ZNF423	2.23814	2.20157	82.4884	1.06294e-19	7.97079e-19
Alpha	ENSG00000129071	MBD4	-0.546749	5.09707	82.3713	1.12777e-19	8.44519e-19
Alpha	ENSG00000168874	ATOH8	3.51171	1.17937	82.3663	1.13064e-19	8.46276e-19
Alpha	ENSG00000172379	ARNT2	-1.08825	3.21089	82.2887	1.17591e-19	8.78935e-19
Alpha	ENSG00000197385	ZNF860	-2.65386	-0.573967	80.9373	2.32991e-19	1.71295e-18
Alpha	ENSG00000099326	MZF1	-0.835195	4.68702	80.8732	2.40681e-19	1.76547e-18
Alpha	ENSG00000105516	DBP	1.50698	3.16199	79.8178	4.10571e-19	2.98052e-18
Alpha	ENSG00000063438	AHRR	2.44019	1.18607	79.5191	4.77591e-19	3.45462e-18
Alpha	ENSG00000148200	NR6A1	1.06415	3.89577	79.2109	5.58219e-19	4.02162e-18
Alpha	ENSG00000184635	ZNF93	1.58195	4.05029	78.9641	6.3249e-19	4.5425e-18
Alpha	ENSG00000019549	SNAI2	3.96651	1.27215	78.8315	6.76392e-19	4.85349e-18
Alpha	ENSG00000142409	ZNF787	0.822973	4.26531	78.1903	9.35788e-19	6.65271e-18
Alpha	ENSG00000196378	ZNF34	-0.811647	3.21737	78.1229	9.68256e-19	6.8805e-18
Alpha	ENSG00000159216	RUNX1	2.99621	1.53193	77.6342	1.24007e-18	8.77727e-18
Alpha	ENSG00000080298	RFX3	-0.827343	4.91139	77.4722	1.34607e-18	9.48592e-18
Alpha	ENSG00000175592	FOSL1	4.05522	1.35814	76.5274	2.17178e-18	1.512e-17
Alpha	ENSG00000163623	NKX6-1	0.793678	5.14523	76.5041	2.19752e-18	1.52926e-17
Alpha	ENSG00000179388	EGR3	1.23304	3.88119	76.3279	2.40266e-18	1.66699e-17
Alpha	ENSG00000149922	TBX6	2.05743	2.17604	76.0283	2.79627e-18	1.9351e-17
Alpha	ENSG00000104856	RELB	2.4349	1.76674	75.9097	2.96936e-18	2.05224e-17
Alpha	ENSG00000118689	FOXO3	0.800039	5.17177	75.7731	3.18209e-18	2.1955e-17
Alpha	ENSG00000185669	SNAI3	3.77161	1.15401	75.7478	3.22317e-18	2.22195e-17
Alpha	ENSG00000179059	ZFP42	-3.53802	-0.854296	74.2274	6.96158e-18	4.73042e-17
Alpha	ENSG00000171425	ZNF581	0.888566	4.41955	74.0295	7.69582e-18	5.21178e-17
Alpha	ENSG00000198429	ZNF69	1.81796	2.28454	73.8921	8.25048e-18	5.58273e-17
Alpha	ENSG00000148143	ZNF462	-0.888755	4.41863	73.7383	8.91925e-18	6.02264e-17
Alpha	ENSG00000010818	HIVEP2	1.35761	2.51364	73.0702	1.25118e-17	8.38185e-17
Alpha	ENSG00000143995	MEIS1	0.728896	5.53079	70.6979	4.16329e-17	2.71143e-16
Alpha	ENSG00000043039	BARX2	4.62056	0.896032	70.422	4.78839e-17	3.10601e-16
Alpha	ENSG00000175329	ISX	1.67478	1.87561	70.3463	4.97563e-17	3.22229e-16
Alpha	ENSG00000235109	ZSCAN31	1.5283	2.48983	69.8888	6.27445e-17	4.0359e-16
Alpha	ENSG00000164107	HAND2	2.71922	1.42428	69.7038	6.89137e-17	4.4239e-16
Alpha	ENSG00000115112	TFCP2L1	2.29211	2.43867	69.1326	9.2061e-17	5.86322e-16
Alpha	ENSG00000164916	FOXK1	-0.573036	4.02689	68.6771	1.15979e-16	7.32298e-16
Alpha	ENSG00000197044	ZNF441	-0.956821	3.61685	68.3881	1.34289e-16	8.42632e-16
Alpha	ENSG00000029153	ARNTL2	-1.47772	1.29113	68.2176	1.46414e-16	9.16935e-16
Alpha	ENSG00000175395	ZNF25	-0.935459	2.62774	66.5973	3.33037e-16	2.03901e-15
Alpha	ENSG00000165156	ZHX1	-0.521354	5.43376	66.518	3.46709e-16	2.12111e-15
Alpha	ENSG00000134317	GRHL1	-0.788337	3.24094	66.3138	3.84557e-16	2.34732e-15
Alpha	ENSG00000171817	ZNF540	-0.913918	2.22098	65.4238	6.04061e-16	3.6431e-15
Alpha	ENSG00000074047	GLI2	4.34452	0.548099	65.2165	6.71051e-16	4.03806e-15
Alpha	ENSG00000245848	CEBPA	2.39983	1.29827	65.1103	7.08206e-16	4.25372e-15
Alpha	ENSG00000170345	FOS	1.3791	10.2845	64.6271	9.05033e-16	5.39577e-15
Alpha	ENSG00000136603	SKIL	0.753104	5.48825	64.2883	1.07482e-15	6.38679e-15
Alpha	ENSG00000138336	TET1	0.982611	4.7875	63.7296	1.42724e-15	8.42516e-15
Alpha	ENSG00000173894	CBX2	1.56375	2.41932	62.2163	3.07733e-15	1.78013e-14
Alpha	ENSG00000140382	HMG20A	0.824199	4.13335	62.0189	3.40173e-15	1.96216e-14
Alpha	ENSG00000168062	BATF2	3.53932	0.964819	61.9445	3.53276e-15	2.03629e-14
Alpha	ENSG00000121297	TSHZ3	1.84993	1.56279	61.494	4.44087e-15	2.54338e-14
Alpha	ENSG00000140044	JDP2	2.46056	1.17266	61.0341	5.60954e-15	3.18895e-14
Alpha	ENSG00000167685	ZNF444	0.763868	4.53031	60.1234	8.90949e-15	5.00152e-14
Alpha	ENSG00000166888	STAT6	1.31423	3.06283	59.9772	9.59625e-15	5.3777e-14
Alpha	ENSG00000082641	NFE2L1	-0.567051	5.10645	59.9076	9.94161e-15	5.5693e-14
Alpha	ENSG00000105856	HBP1	0.798341	5.35728	59.7796	1.06098e-14	5.9292e-14
Alpha	ENSG00000171735	CAMTA1	-0.513289	6.19558	58.7798	1.76338e-14	9.6935e-14
Alpha	ENSG00000175550	DRAP1	-0.581572	6.94929	58.6476	1.88596e-14	1.03462e-13
Alpha	ENSG00000006468	ETV1	-1.04624	4.10598	58.2921	2.25947e-14	1.23366e-13
Alpha	ENSG00000106261	ZKSCAN1	-0.586513	7.96623	57.6044	3.20508e-14	1.73121e-13
Alpha	ENSG00000114126	TFDP2	0.602102	5.67622	57.5443	3.30448e-14	1.78133e-13
Alpha	ENSG00000167380	ZNF226	-0.547824	4.57827	57.1728	3.99156e-14	2.14312e-13
Alpha	ENSG00000103449	SALL1	5.61911	0.195696	56.7638	4.91426e-14	2.62457e-13
Alpha	ENSG00000167635	ZNF146	0.550981	4.96237	56.5682	5.42823e-14	2.88665e-13
Alpha	ENSG00000166823	MESP1	-1.20252	2.43983	56.1946	6.56413e-14	3.46559e-13
Alpha	ENSG00000131408	NR1H2	0.980007	3.85375	56.1817	6.60751e-14	3.48736e-13
Alpha	ENSG00000163884	KLF15	4.6304	0.374876	55.9419	7.46464e-14	3.92051e-13
Alpha	ENSG00000177030	DEAF1	-0.721859	4.46162	55.0087	1.19999e-13	6.21153e-13
Alpha	ENSG00000146592	CREB5	1.64731	1.61841	53.8905	2.11977e-13	1.08063e-12
Alpha	ENSG00000196843	ARID5A	1.63248	2.2415	53.6679	2.37414e-13	1.20612e-12
Alpha	ENSG00000167034	NKX3-1	2.19423	0.925932	53.4649	2.63257e-13	1.33238e-12
Alpha	ENSG00000156853	ZNF689	0.77132	3.57408	53.4209	2.69215e-13	1.36181e-12
Alpha	ENSG00000214575	CPEB1	-1.57173	0.185801	53.3329	2.81552e-13	1.42141e-12
Alpha	ENSG00000184828	ZBTB7C	1.81317	1.57621	53.1984	3.01512e-13	1.51932e-12
Alpha	ENSG00000107249	GLIS3	1.05391	5.13791	52.0854	5.31389e-13	2.63006e-12
Alpha	ENSG00000128272	ATF4	0.650867	6.88314	51.9607	5.66233e-13	2.79823e-12
Alpha	ENSG00000118922	KLF12	-0.799851	3.0219	51.5066	7.13583e-13	3.49857e-12
Alpha	ENSG00000171532	NEUROD2	3.39869	0.194374	51.3278	7.81627e-13	3.82521e-12
Alpha	ENSG00000108788	MLX	-0.552607	4.50369	51.192	8.37604e-13	4.09048e-12
Alpha	ENSG00000143171	RXRG	1.56911	2.13722	50.8405	1.00183e-12	4.866e-12
Alpha	ENSG00000102984	ZNF821	-0.65846	4.04978	50.4087	1.2484e-12	6.02913e-12
Alpha	ENSG00000153234	NR4A2	0.882137	4.12267	50.2291	1.36803e-12	6.58914e-12
Alpha	ENSG00000127124	HIVEP3	-0.8434	2.60278	50.0726	1.48161e-12	7.10652e-12
Alpha	ENSG00000197472	ZNF695	2.92951	0.586798	48.8726	2.73133e-12	1.28676e-11
Alpha	ENSG00000127528	KLF2	1.36457	2.89851	48.8407	2.77624e-12	1.30716e-11
Alpha	ENSG00000101493	ZNF516	-0.719201	3.59452	48.562	3.20009e-12	1.50147e-11
Alpha	ENSG00000134954	ETS1	0.771354	3.75761	48.4922	3.31611e-12	1.55319e-11
Alpha	ENSG00000144485	HES6	0.966577	4.46643	48.1274	3.99408e-12	1.86102e-11
Alpha	ENSG00000134852	CLOCK	-0.543835	4.81257	47.9332	4.40988e-12	2.04591e-11
Alpha	ENSG00000072736	NFATC3	0.529563	4.59406	47.8521	4.59622e-12	2.12929e-11
Alpha	ENSG00000172819	RARG	2.42982	1.09537	47.6746	5.03165e-12	2.32435e-11
Alpha	ENSG00000101544	ADNP2	0.707677	3.74443	47.3011	6.08771e-12	2.7946e-11
Alpha	ENSG00000178860	MSC	3.75573	0.329582	47.1058	6.72557e-12	3.08041e-11
Alpha	ENSG00000152217	SETBP1	0.663933	5.21103	46.612	8.65276e-12	3.93628e-11
Alpha	ENSG00000198039	ZNF273	1.06329	2.55856	46.239	1.04673e-11	4.73641e-11
Alpha	ENSG00000144655	CSRNP1	1.23492	4.47234	46.2	1.06776e-11	4.82478e-11
Alpha	ENSG00000100625	SIX4	1.66305	1.66167	45.9766	1.19675e-11	5.38807e-11
Alpha	ENSG00000130254	SAFB2	0.452456	5.86166	45.968	1.20203e-11	5.40881e-11
Alpha	ENSG00000129173	E2F8	2.40078	1.12024	45.763	1.33464e-11	5.98714e-11
Alpha	ENSG00000135899	SP110	2.41665	0.956199	45.2498	1.73439e-11	7.71397e-11
Alpha	ENSG00000197647	ZNF433	1.06823	3.13899	44.9612	2.00978e-11	8.89469e-11
Alpha	ENSG00000025434	NR1H3	1.09207	2.62476	44.7332	2.25798e-11	9.9441e-11
Alpha	ENSG00000178764	ZHX2	1.37633	3.04678	44.3175	2.79205e-11	1.21864e-10
Alpha	ENSG00000132846	ZBED3	0.565668	4.68023	43.8355	3.57165e-11	1.54637e-10
Alpha	ENSG00000196132	MYT1	-0.990033	3.42423	43.47	4.30509e-11	1.85448e-10
Alpha	ENSG00000197933	ZNF823	0.953495	2.61932	42.6122	6.67418e-11	2.84689e-10
Alpha	ENSG00000179456	ZBTB18	0.615241	3.80846	42.5849	6.76811e-11	2.88619e-10
Alpha	ENSG00000197863	ZNF790	-0.558228	3.54443	42.433	7.31437e-11	3.1052e-10
Alpha	ENSG00000125820	NKX2-2	-0.793571	5.6489	42.3832	7.50324e-11	3.18119e-10
Alpha	ENSG00000101115	SALL4	1.82906	1.87628	42.1344	8.52121e-11	3.59861e-10
Alpha	ENSG00000213015	ZNF580	-0.420502	5.33246	41.7749	1.02411e-10	4.29459e-10
Alpha	ENSG00000126705	AHDC1	-0.676354	3.8709	41.2026	1.37242e-10	5.68584e-10
Alpha	ENSG00000169926	KLF13	0.699275	4.59244	41.0727	1.46667e-10	6.06432e-10
Alpha	ENSG00000196670	ZFP62	0.592145	3.86445	41.0556	1.47962e-10	6.11272e-10
Alpha	ENSG00000116990	MYCL	1.05893	2.10816	40.8301	1.66053e-10	6.82691e-10
Alpha	ENSG00000171223	JUNB	1.20751	8.19276	40.7318	1.74621e-10	7.16821e-10
Alpha	ENSG00000173068	BNC2	2.96518	0.55094	40.7164	1.76008e-10	7.22146e-10
Alpha	ENSG00000170515	PA2G4	0.460239	6.74161	40.4322	2.03562e-10	8.30766e-10
Alpha	ENSG00000132604	TERF2	0.552806	4.27741	40.208	2.28307e-10	9.26833e-10
Alpha	ENSG00000008441	NFIX	2.10218	1.56329	39.7978	2.81667e-10	1.13546e-09
Alpha	ENSG00000138311	ZNF365	-1.51964	0.230603	39.683	2.98713e-10	1.20088e-09
Alpha	ENSG00000196381	ZNF781	-0.684821	2.87845	39.5502	3.19726e-10	1.2828e-09
Alpha	ENSG00000173757	STAT5B	-0.567148	3.33421	39.5456	3.20494e-10	1.28556e-09
Alpha	ENSG00000116044	NFE2L2	0.516564	5.5088	39.4978	3.28426e-10	1.31639e-09
Alpha	ENSG00000018869	ZNF582	-0.693462	2.45702	39.2819	3.66818e-10	1.46265e-09
Alpha	ENSG00000167074	TEF	0.877962	3.16534	39.0985	4.02951e-10	1.60198e-09
Alpha	ENSG00000123405	NFE2	2.82049	0.668632	39.0747	4.07899e-10	1.62006e-09
Alpha	ENSG00000213988	ZNF90	1.1385	2.3599	38.8176	4.6532e-10	1.83997e-09
Alpha	ENSG00000178150	ZNF114	2.89393	0.394502	38.3055	6.04924e-10	2.37512e-09
Alpha	ENSG00000066136	NFYC	0.45526	4.8683	38.042	6.92393e-10	2.70539e-09
Alpha	ENSG00000153896	ZNF599	-0.677135	3.35121	38.0204	7.00101e-10	2.73485e-09
Alpha	ENSG00000101096	NFATC2	1.44178	1.98985	37.9491	7.26158e-10	2.83116e-09
Alpha	ENSG00000109906	ZBTB16	1.53851	2.63622	37.5835	8.75821e-10	3.39662e-09
Alpha	ENSG00000112658	SRF	1.13477	4.41663	37.4437	9.40892e-10	3.64373e-09
Alpha	ENSG00000139083	ETV6	0.638577	3.54409	37.2021	1.06501e-09	4.10862e-09
Alpha	ENSG00000186814	ZSCAN30	-0.52945	4.3004	37.0901	1.12797e-09	4.34115e-09
Alpha	ENSG00000263001	GTF2I	-0.468158	8.0688	37.0662	1.14185e-09	4.39143e-09
Alpha	ENSG00000122085	MTERF4	-0.397013	5.1602	36.8393	1.28277e-09	4.90997e-09
Alpha	ENSG00000134046	MBD2	0.717368	4.53981	36.7278	1.35828e-09	5.17936e-09
Alpha	ENSG00000105419	MEIS3	-0.998456	2.51492	36.5851	1.46146e-09	5.56622e-09
Alpha	ENSG00000187079	TEAD1	-0.40365	5.15269	36.3904	1.61496e-09	6.13061e-09
Alpha	ENSG00000175832	ETV4	3.92858	0.177256	36.3884	1.61663e-09	6.13553e-09
Alpha	ENSG00000174306	ZHX3	-0.765263	3.46785	35.8415	2.14044e-09	8.05159e-09
Alpha	ENSG00000183340	JRKL	0.626282	3.35141	35.6227	2.39481e-09	8.97914e-09
Alpha	ENSG00000173039	RELA	0.577551	3.59452	35.4961	2.55562e-09	9.57319e-09
Alpha	ENSG00000185591	SP1	0.614566	3.78153	35.4498	2.61709e-09	9.79437e-09
Alpha	ENSG00000105497	ZNF175	-0.733215	2.11856	35.4198	2.65775e-09	9.93732e-09
Alpha	ENSG00000064961	HMG20B	0.463846	4.75271	35.1264	3.08983e-09	1.15023e-08
Alpha	ENSG00000118263	KLF7	-0.588838	3.67468	35.1208	3.09876e-09	1.15328e-08
Alpha	ENSG00000277462	ZNF670	1.11096	2.15009	34.9977	3.30096e-09	1.22741e-08
Alpha	ENSG00000162714	ZNF496	0.798956	2.59236	34.9422	3.39637e-09	1.26056e-08
Alpha	ENSG00000267041	ZNF850	1.28949	1.5904	34.7427	3.76279e-09	1.39017e-08
Alpha	ENSG00000114861	FOXP1	-0.361664	6.6262	34.4272	4.42499e-09	1.62367e-08
Alpha	ENSG00000072310	SREBF1	-0.609933	3.8846	33.4827	7.19009e-09	2.59812e-08
Alpha	ENSG00000173451	THAP2	-0.457203	4.06107	33.4584	7.28049e-09	2.62785e-08
Alpha	ENSG00000140548	ZNF710	0.893036	3.29493	33.0917	8.79149e-09	3.14929e-08
Alpha	ENSG00000204611	ZNF616	0.833177	2.83862	32.9778	9.32157e-09	3.33105e-08
Alpha	ENSG00000001167	NFYA	0.829312	2.93727	32.925	9.5784e-09	3.41904e-08
Alpha	ENSG00000005513	SOX8	1.88663	0.890723	32.7891	1.02721e-08	3.65535e-08
Alpha	ENSG00000102804	TSC22D1	0.332519	7.22791	32.7492	1.04848e-08	3.72857e-08
Alpha	ENSG00000083844	ZNF264	-0.49291	4.20031	32.4585	1.21764e-08	4.31025e-08
Alpha	ENSG00000143842	SOX13	0.961268	2.7212	32.3032	1.31893e-08	4.64533e-08
Alpha	ENSG00000108509	CAMTA2	-0.574198	3.20339	32.2538	1.35289e-08	4.75973e-08
Alpha	ENSG00000115966	ATF2	-0.364682	4.76237	32.1327	1.4399e-08	5.04934e-08
Alpha	ENSG00000185238	PRMT3	0.939475	2.33032	31.8147	1.69604e-08	5.90959e-08
Alpha	ENSG00000167232	ZNF91	-0.470111	5.87698	31.3346	2.1717e-08	7.51071e-08
Alpha	ENSG00000171606	ZNF274	0.668359	2.99113	31.2319	2.28967e-08	7.90057e-08
Alpha	ENSG00000196437	ZNF569	-0.620443	2.85755	31.1854	2.34529e-08	8.08039e-08
Alpha	ENSG00000162702	ZNF281	0.494457	5.23927	31.1266	2.41738e-08	8.31988e-08
Alpha	ENSG00000100207	TCF20	-0.517384	3.69682	31.0983	2.45282e-08	8.43648e-08
Alpha	ENSG00000131759	RARA	0.713757	2.95808	30.9651	2.62711e-08	9.01482e-08
Alpha	ENSG00000169989	TIGD4	-0.958814	1.06198	30.7029	3.00713e-08	1.02795e-07
Alpha	ENSG00000185122	HSF1	0.477984	4.4243	30.6404	3.10555e-08	1.0598e-07
Alpha	ENSG00000116539	ASH1L	-0.357258	6.54597	30.0562	4.19701e-08	1.41492e-07
Alpha	ENSG00000182158	CREB3L2	0.388143	5.2271	29.7055	5.02926e-08	1.68459e-07
Alpha	ENSG00000130522	JUND	0.84873	8.80293	29.6122	5.2771e-08	1.76358e-07
Alpha	ENSG00000198945	L3MBTL3	0.643651	3.14429	28.8359	7.87782e-08	2.59354e-07
Alpha	ENSG00000166261	ZNF202	0.936658	1.91454	28.291	1.04382e-07	3.39288e-07
Alpha	ENSG00000126456	IRF3	0.423965	4.84405	28.1596	1.11712e-07	3.62095e-07
Alpha	ENSG00000130818	ZNF426	0.51777	4.05282	28.1188	1.14095e-07	3.69447e-07
Alpha	ENSG00000214022	REPIN1	0.349252	4.80811	27.7403	1.38742e-07	4.46213e-07
Alpha	ENSG00000237765	FAM200B	-0.3059	6.31875	27.6402	1.46107e-07	4.68966e-07
Alpha	ENSG00000196757	ZNF700	0.712138	2.69422	27.5643	1.51959e-07	4.87168e-07
Alpha	ENSG00000182463	TSHZ2	-0.350804	5.43571	27.3548	1.69347e-07	5.40764e-07
Alpha	ENSG00000189079	ARID2	0.405121	4.68002	27.218	1.81761e-07	5.78802e-07
Alpha	ENSG00000236287	ZBED5	-0.314001	5.165	26.9908	2.04426e-07	6.47783e-07
Alpha	ENSG00000197928	ZNF677	0.416938	4.60479	26.9743	2.06183e-07	6.52839e-07
Alpha	ENSG00000100146	SOX10	2.86032	0.0788848	26.8909	2.15275e-07	6.80692e-07
Alpha	ENSG00000198453	ZNF568	-0.381462	4.47674	26.595	2.50888e-07	7.86829e-07
Alpha	ENSG00000126003	PLAGL2	0.553779	3.93532	26.4494	2.70536e-07	8.45653e-07
Alpha	ENSG00000185129	PURA	-0.352241	6.03845	26.0015	3.41153e-07	1.05738e-06
Alpha	ENSG00000185404	SP140L	1.62874	1.39725	25.6809	4.02789e-07	1.23844e-06
Alpha	ENSG00000170100	ZNF778	-0.641651	2.54613	25.6632	4.06502e-07	1.24962e-06
Alpha	ENSG00000243660	ZNF487	-0.572739	3.32228	25.4976	4.4294e-07	1.35672e-06
Alpha	ENSG00000130816	DNMT1	-0.47157	5.11719	25.2485	5.03977e-07	1.53523e-06
Alpha	ENSG00000198298	ZNF485	1.10901	1.49143	25.2078	5.14731e-07	1.56474e-06
Alpha	ENSG00000168610	STAT3	0.498477	6.05272	25.1698	5.24967e-07	1.59465e-06
Alpha	ENSG00000134323	MYCN	0.851608	2.25115	25.0649	5.54317e-07	1.67939e-06
Alpha	ENSG00000169951	ZNF764	0.49997	3.47985	25.0258	5.65681e-07	1.71125e-06
Alpha	ENSG00000135625	EGR4	0.845795	4.75687	24.942	5.9082e-07	1.78362e-06
Alpha	ENSG00000197841	ZNF181	0.430316	3.90686	24.9168	5.98577e-07	1.80535e-06
Alpha	ENSG00000135373	EHF	0.890696	4.90954	24.8569	6.17484e-07	1.85786e-06
Alpha	ENSG00000152454	ZNF256	0.868194	1.93478	24.7744	6.44472e-07	1.93617e-06
Alpha	ENSG00000115163	CENPA	1.771	1.01556	24.6871	6.74351e-07	2.02218e-06
Alpha	ENSG00000257446	ZNF878	4.39223	-0.551951	24.5524	7.23152e-07	2.16089e-06
Alpha	ENSG00000168795	ZBTB5	0.598996	2.82481	24.482	7.50092e-07	2.23725e-06
Alpha	ENSG00000129535	NRL	-1.02319	0.998297	24.2114	8.63192e-07	2.56416e-06
Alpha	ENSG00000229676	ZNF492	1.48721	0.816271	24.1812	8.76838e-07	2.60326e-06
Alpha	ENSG00000160199	PKNOX1	0.486178	4.48323	23.9444	9.91581e-07	2.93207e-06
Alpha	ENSG00000213347	MXD3	1.05836	2.39936	23.8608	1.0356e-06	3.05328e-06
Alpha	ENSG00000221923	ZNF880	0.548349	3.17593	23.8585	1.03682e-06	3.05633e-06
Alpha	ENSG00000234616	JRK	-0.595404	2.93751	23.8311	1.0517e-06	3.09905e-06
Alpha	ENSG00000172845	SP3	0.354242	4.86247	23.7928	1.07282e-06	3.15784e-06
Alpha	ENSG00000204304	PBX2	0.334091	4.76817	23.7719	1.08452e-06	3.18936e-06
Alpha	ENSG00000198556	ZNF789	-0.514643	2.95772	23.6704	1.14329e-06	3.35609e-06
Alpha	ENSG00000122034	GTF3A	0.557498	5.76623	23.6613	1.1487e-06	3.37134e-06
Alpha	ENSG00000161914	ZNF653	-0.657509	1.78347	23.5283	1.23093e-06	3.59764e-06
Alpha	ENSG00000165804	ZNF219	0.764612	3.16161	23.2328	1.43526e-06	4.16768e-06
Alpha	ENSG00000143033	MTF2	0.33957	5.43707	23.2106	1.45194e-06	4.21232e-06
Alpha	ENSG00000189190	ZNF600	1.01988	1.51232	23.0335	1.59203e-06	4.60056e-06
Alpha	ENSG00000117505	DR1	-0.319888	4.5338	22.9786	1.63818e-06	4.72716e-06
Alpha	ENSG00000164296	TIGD6	-0.59999	2.31482	22.83	1.76983e-06	5.08793e-06
Alpha	ENSG00000138738	PRDM5	0.508664	3.03387	22.6837	1.9098e-06	5.46892e-06
Alpha	ENSG00000197128	ZNF772	-0.782761	2.10022	22.6723	1.92116e-06	5.49658e-06
Alpha	ENSG00000147180	ZNF711	0.48273	4.30036	22.6718	1.92163e-06	5.49695e-06
Alpha	ENSG00000187098	MITF	0.93008	1.92009	21.907	2.86184e-06	8.05936e-06
Alpha	ENSG00000100105	PATZ1	0.571691	4.17142	21.6462	3.27859e-06	9.15635e-06
Alpha	ENSG00000181472	ZBTB2	0.583846	2.78916	21.4816	3.57234e-06	9.93206e-06
Alpha	ENSG00000111145	ELK3	0.932507	1.71663	21.478	3.5791e-06	9.94742e-06
Alpha	ENSG00000229809	ZNF688	-0.350225	4.20632	21.3776	3.77159e-06	1.04554e-05
Alpha	ENSG00000214029	ZNF891	-0.37788	4.03776	21.2079	4.12063e-06	1.13898e-05
Alpha	ENSG00000197279	ZNF165	1.19114	2.97716	21.1155	4.32414e-06	1.19257e-05
Alpha	ENSG00000152443	ZNF776	-0.471109	3.13129	20.9122	4.80818e-06	1.32043e-05
Alpha	ENSG00000163795	ZNF513	-0.503965	2.97033	20.8754	4.90147e-06	1.34376e-05
Alpha	ENSG00000129911	KLF16	-0.509647	3.23252	20.8158	5.05638e-06	1.38506e-05
Alpha	ENSG00000188295	ZNF669	0.449382	3.29005	20.4522	6.11408e-06	1.6607e-05
Alpha	ENSG00000196418	ZNF124	0.62755	2.65902	20.4223	6.21027e-06	1.68512e-05
Alpha	ENSG00000165821	SALL2	-0.53042	3.28263	20.2647	6.74332e-06	1.81967e-05
Alpha	ENSG00000116604	MEF2D	0.493769	3.50619	20.2314	6.86176e-06	1.84947e-05
Alpha	ENSG00000119950	MXI1	0.337999	4.33942	20.2154	6.91926e-06	1.86403e-05
Alpha	ENSG00000141258	SGSM2	-0.429319	4.03637	20.2085	6.94438e-06	1.87009e-05
Alpha	ENSG00000148516	ZEB1	-0.537033	2.93802	19.99	7.78463e-06	2.08706e-05
Alpha	ENSG00000143365	RORC	0.609985	3.37167	19.9894	7.78714e-06	2.08739e-05
Alpha	ENSG00000160908	ZNF394	0.539133	4.10642	19.8002	8.59742e-06	2.29241e-05
Alpha	ENSG00000084676	NCOA1	-0.316452	5.03903	19.7902	8.6425e-06	2.30329e-05
Alpha	ENSG00000117036	ETV3	0.560943	2.80272	19.6955	9.08129e-06	2.41544e-05
Alpha	ENSG00000176723	ZNF843	-0.914567	0.833566	19.612	9.4869e-06	2.51876e-05
Alpha	ENSG00000196967	ZNF585A	-0.618293	2.65209	19.6088	9.50308e-06	2.5214e-05
Alpha	ENSG00000186777	ZNF732	3.55727	-0.613667	19.4566	1.02913e-05	2.71937e-05
Alpha	ENSG00000182568	SATB1	0.395538	4.93855	19.4305	1.04326e-05	2.7549e-05
Alpha	ENSG00000197020	ZNF100	0.567398	2.77082	19.3549	1.08543e-05	2.86017e-05
Alpha	ENSG00000137166	FOXP4	-0.325474	4.98552	19.2343	1.15617e-05	3.03716e-05
Alpha	ENSG00000138380	CARF	-0.581327	3.3403	19.0181	1.29484e-05	3.38436e-05
Alpha	ENSG00000198176	TFDP1	-0.362311	4.58695	18.9892	1.31464e-05	3.43388e-05
Alpha	ENSG00000136870	ZNF189	0.411903	3.59351	18.9311	1.35526e-05	3.5337e-05
Alpha	ENSG00000178386	ZNF223	0.830259	1.46369	18.759	1.48324e-05	3.84936e-05
Alpha	ENSG00000165512	ZNF22	0.303396	6.48854	18.5965	1.61517e-05	4.16697e-05
Alpha	ENSG00000196867	ZFP28	-0.483311	2.44179	18.5903	1.62041e-05	4.17981e-05
Alpha	ENSG00000141905	NFIC	0.267702	5.63576	18.585	1.62496e-05	4.19021e-05
Alpha	ENSG00000164749	HNF4G	1.49167	0.458956	18.539	1.66461e-05	4.28631e-05
Alpha	ENSG00000170954	ZNF415	0.560629	2.69236	18.5194	1.68181e-05	4.32714e-05
Alpha	ENSG00000160094	ZNF362	0.513895	3.30085	18.3592	1.82934e-05	4.6888e-05
Alpha	ENSG00000089094	KDM2B	0.528802	2.9558	18.2034	1.98528e-05	5.05398e-05
Alpha	ENSG00000104447	TRPS1	0.654866	2.1325	18.1509	2.04074e-05	5.18943e-05
Alpha	ENSG00000142556	ZNF614	0.563059	2.65138	18.1324	2.0606e-05	5.235e-05
Alpha	ENSG00000141448	GATA6	0.435817	5.07955	18.0572	2.14368e-05	5.43238e-05
Alpha	ENSG00000102878	HSF4	-0.993331	1.11228	17.8216	2.42613e-05	6.10503e-05
Alpha	ENSG00000188227	ZNF793	-0.474844	4.12074	17.4973	2.87722e-05	7.18083e-05
Alpha	ENSG00000171940	ZNF217	0.588698	3.52619	17.4243	2.98985e-05	7.44581e-05
Alpha	ENSG00000143614	GATAD2B	-0.342538	4.27558	17.2024	3.36017e-05	8.30398e-05
Alpha	ENSG00000186487	MYT1L	-0.489367	3.72086	17.1816	3.39714e-05	8.39407e-05
Alpha	ENSG00000123933	MXD4	-0.271027	5.67631	17.1061	3.53484e-05	8.71962e-05
Alpha	ENSG00000141568	FOXK2	-0.333796	3.95217	17.0514	3.63809e-05	8.95791e-05
Alpha	ENSG00000136504	KAT7	0.321803	4.27472	17.0508	3.63923e-05	8.95934e-05
Alpha	ENSG00000159592	GPBP1L1	0.262576	5.11249	16.9367	3.86465e-05	9.48825e-05
Alpha	ENSG00000167491	GATAD2A	0.297761	4.19216	16.863	4.01766e-05	9.85493e-05
Alpha	ENSG00000106571	GLI3	-1.40752	0.132813	16.5631	4.70585e-05	0.000114594
Alpha	ENSG00000112200	ZNF451	-0.256313	5.25137	16.5229	4.80659e-05	0.000116924
Alpha	ENSG00000161298	ZNF382	-0.715536	2.51544	16.5117	4.83505e-05	0.000117545
Alpha	ENSG00000228623	ZNF883	-0.420069	3.89633	16.4601	4.96845e-05	0.000120661
Alpha	ENSG00000185551	NR2F2	0.367574	4.27364	16.3222	5.3434e-05	0.000129145
Alpha	ENSG00000108924	HLF	-0.869185	1.40188	16.2534	5.54093e-05	0.00013358
Alpha	ENSG00000112242	E2F3	0.560781	2.97806	16.2159	5.65165e-05	0.000136107
Alpha	ENSG00000172262	ZNF131	0.32487	5.08642	16.111	5.97354e-05	0.000143473
Alpha	ENSG00000170903	MSANTD4	-0.277977	4.79444	16.1056	5.99051e-05	0.00014386
Alpha	ENSG00000142065	ZFP14	-0.380612	4.30555	15.8887	6.71803e-05	0.000160211
Alpha	ENSG00000102034	ELF4	-1.44336	-0.776424	15.5773	7.91999e-05	0.000186805
Alpha	ENSG00000189298	ZKSCAN3	0.758309	1.73686	15.5206	8.16089e-05	0.000191871
Alpha	ENSG00000175745	NR2F1	1.33237	0.720256	15.5048	8.22974e-05	0.000193433
Alpha	ENSG00000161551	ZNF577	0.557217	3.12986	15.3625	8.8731e-05	0.000207527
Alpha	ENSG00000170365	SMAD1	0.463261	3.62593	15.3143	9.1023e-05	0.000212734
Alpha	ENSG00000118418	HMGN3	-0.266029	8.57907	15.2865	9.23721e-05	0.000215731
Alpha	ENSG00000147601	TERF1	-0.226298	5.50724	15.2631	9.35236e-05	0.000218168
Alpha	ENSG00000198131	ZNF544	-0.321691	3.83112	15.2159	9.58901e-05	0.000223237
Alpha	ENSG00000170448	NFXL1	0.317044	3.92177	15.2137	9.60026e-05	0.000223466
Alpha	ENSG00000171169	NAIF1	-0.568953	1.86502	15.1976	9.68273e-05	0.000225224
Alpha	ENSG00000143379	SETDB1	0.379255	3.64567	15.1878	9.7331e-05	0.000226363
Alpha	ENSG00000227124	ZNF717	0.450776	3.12924	15.1375	9.99577e-05	0.000231904
Alpha	ENSG00000129654	FOXJ1	-0.405033	3.14779	15.0735	0.000103407	0.000239596
Alpha	ENSG00000130940	CASZ1	0.619465	2.51125	15.0348	0.000105545	0.000244305
Alpha	ENSG00000136866	ZFP37	-0.526375	2.63572	14.8393	0.000117069	0.000269511
Alpha	ENSG00000077092	RARB	1.47049	0.530086	14.7722	0.000121309	0.000278754
Alpha	ENSG00000197360	ZNF98	0.68378	2.14987	14.7329	0.000123866	0.000284429
Alpha	ENSG00000150347	ARID5B	0.382778	5.25748	14.6523	0.000129275	0.000296252
Alpha	ENSG00000103343	ZNF174	-0.447274	2.56909	14.6296	0.00013084	0.000299463
Alpha	ENSG00000257923	CUX1	-0.251111	5.40432	14.6002	0.000132898	0.000303829
Alpha	ENSG00000204231	RXRB	0.341812	4.08092	14.4899	0.000140913	0.000320926
Alpha	ENSG00000176542	USF3	0.324826	4.35789	14.3154	0.000154596	0.000350507
Alpha	ENSG00000165259	HDX	0.443986	3.04	14.2142	0.000163136	0.000369245
Alpha	ENSG00000145908	ZNF300	0.575356	2.71413	14.2064	0.00016381	0.000370616
Alpha	ENSG00000076108	BAZ2A	-0.265169	5.14725	14.0355	0.00017939	0.000404053
Alpha	ENSG00000177732	SOX12	-0.308617	4.058	13.7925	0.000204148	0.000456569
Alpha	ENSG00000153975	ZUFSP	-0.302832	3.59277	13.7404	0.000209894	0.00046877
Alpha	ENSG00000118217	ATF6	0.233801	5.09037	13.7133	0.000212937	0.000475237
Alpha	ENSG00000182903	ZNF721	-0.225775	5.24302	13.7045	0.000213944	0.000477221
Alpha	ENSG00000186448	ZNF197	-0.301483	3.81372	13.6185	0.000223971	0.000498073
Alpha	ENSG00000171469	ZNF561	0.33927	3.90767	13.4868	0.000240241	0.000532057
Alpha	ENSG00000197619	ZNF615	0.46587	2.73914	13.4715	0.00024221	0.000536195
Alpha	ENSG00000180938	ZNF572	1.19746	0.665257	13.442	0.000246047	0.000543944
Alpha	ENSG00000249471	ZNF324B	-0.543747	1.58622	13.3858	0.000253542	0.000559977
Alpha	ENSG00000118260	CREB1	-0.230884	5.48959	13.3733	0.000255225	0.000563387
Alpha	ENSG00000081059	TCF7	0.421266	3.28959	13.3275	0.000261541	0.000576698
Alpha	ENSG00000173404	INSM1	-0.405131	6.50289	13.3198	0.00026262	0.000578839
Alpha	ENSG00000113658	SMAD5	-0.286505	5.53577	13.304	0.000264846	0.000583322
Alpha	ENSG00000187187	ZNF546	-0.490895	2.1575	13.2126	0.00027807	0.000609978
Alpha	ENSG00000171291	ZNF439	-0.360858	3.3718	13.2127	0.000278052	0.000609978
Alpha	ENSG00000173120	KDM2A	0.24803	5.0299	13.1315	0.000290375	0.000635675
Alpha	ENSG00000126351	THRA	-0.278901	4.93683	13.0889	0.000297052	0.000649061
Alpha	ENSG00000154655	L3MBTL4	0.900797	1.02915	13.0446	0.000304162	0.000663751
Alpha	ENSG00000277258	PCGF2	-0.258847	5.09693	13.0198	0.000308217	0.000672
Alpha	ENSG00000103495	MAZ	-0.214978	5.37457	12.9012	0.000328377	0.000713546
Alpha	ENSG00000198783	ZNF830	0.319899	4.74749	12.7527	0.000355494	0.000769673
Alpha	ENSG00000166526	ZNF3	0.26106	4.576	12.7388	0.000358141	0.000774988
Alpha	ENSG00000256229	ZNF486	0.765031	1.42034	12.7246	0.000360877	0.000780595
Alpha	ENSG00000171443	ZNF524	0.43012	3.98299	12.7154	0.000362666	0.000784149
Alpha	ENSG00000083828	ZNF586	0.483419	2.7657	12.5802	0.000389865	0.000839473
Alpha	ENSG00000188313	PLSCR1	0.307902	4.31556	12.5588	0.000394352	0.000848455
Alpha	ENSG00000129194	SOX15	-0.619834	1.48402	12.5102	0.00040473	0.000869485
Alpha	ENSG00000189144	ZNF573	-0.427054	2.87109	12.4239	0.000423871	0.000907733
Alpha	ENSG00000120690	ELF1	0.248227	5.49963	12.417	0.000425439	0.00091085
Alpha	ENSG00000177463	NR2C2	-0.344615	3.65002	12.322	0.00044766	0.000955484
Alpha	ENSG00000166432	ZMAT1	-0.426836	4.34188	12.3089	0.000450795	0.000961691
Alpha	ENSG00000182983	ZNF662	0.54795	2.74483	12.3024	0.000452377	0.000964685
Alpha	ENSG00000154832	CXXC1	0.240215	4.36854	12.263	0.000462024	0.000983958
Alpha	ENSG00000198393	ZNF26	-0.344717	3.39864	12.2268	0.000471067	0.00100216
Alpha	ENSG00000214189	ZNF788	1.09404	0.450318	12.1967	0.000478741	0.00101701
Alpha	ENSG00000180884	ZNF792	1.02165	0.65253	12.124	0.000497777	0.00105398
Alpha	ENSG00000106554	CHCHD3	0.263065	5.19724	12.1199	0.000498858	0.00105613
Alpha	ENSG00000170653	ATF7	0.36358	4.27124	12.0404	0.000520593	0.00109826
Alpha	ENSG00000146676	PURB	0.303544	4.94611	11.9981	0.000532556	0.00112188
Alpha	ENSG00000198040	ZNF84	0.305713	4.46999	11.9923	0.000534208	0.00112492
Alpha	ENSG00000160352	ZNF714	0.396217	4.09968	11.9716	0.000540167	0.00113673
Alpha	ENSG00000250312	ZNF718	-0.510429	2.08418	11.9106	0.000558154	0.00117199
Alpha	ENSG00000139352	ASCL1	2.02147	0.0495744	11.8899	0.000564391	0.00118431
Alpha	ENSG00000175197	DDIT3	0.431924	5.61667	11.8144	0.00058774	0.00123011
Alpha	ENSG00000164631	ZNF12	0.288226	4.24603	11.783	0.000597756	0.00125042
Alpha	ENSG00000126368	NR1D1	0.871779	2.7928	11.7742	0.000600567	0.00125598
Alpha	ENSG00000181722	ZBTB20	0.291361	4.86585	11.6452	0.000643686	0.00133956
Alpha	ENSG00000066336	SPI1	-1.24925	-0.323214	11.6	0.000659503	0.00136842
Alpha	ENSG00000151657	KIN	0.259143	4.96094	11.5709	0.000669926	0.00138933
Alpha	ENSG00000198146	ZNF770	0.231178	5.06729	11.5699	0.000670298	0.00138993
Alpha	ENSG00000197779	ZNF81	-0.637493	1.72963	11.5537	0.000676151	0.00140116
Alpha	ENSG00000128573	FOXP2	-0.48436	4.03673	11.5413	0.000680672	0.00140963
Alpha	ENSG00000197608	ZNF841	0.469076	2.57015	11.5049	0.000694113	0.00143542
Alpha	ENSG00000025293	PHF20	-0.195726	5.16032	11.4995	0.00069615	0.00143928
Alpha	ENSG00000105127	AKAP8	0.290502	3.97657	11.3425	0.000757526	0.001557
Alpha	ENSG00000137947	GTF2B	0.362215	5.22966	11.3235	0.000765323	0.00157223
Alpha	ENSG00000066422	ZBTB11	0.253475	4.6051	11.3003	0.000774934	0.00159157
Alpha	ENSG00000185947	ZNF267	0.385987	3.02645	11.2712	0.000787196	0.00161572
Alpha	ENSG00000197579	TOPORS	0.222254	5.43482	11.2571	0.000793205	0.00162785
Alpha	ENSG00000116731	PRDM2	0.247783	5.08428	11.2409	0.000800135	0.00164082
Alpha	ENSG00000112561	TFEB	-0.760517	1.77179	11.2353	0.000802577	0.00164541
Alpha	ENSG00000101457	DNTTIP1	0.243959	4.46151	11.2348	0.000802798	0.00164566
Alpha	ENSG00000171161	ZNF672	0.35056	3.25227	11.2015	0.000817308	0.00167306
Alpha	ENSG00000197063	MAFG	-0.420979	4.79916	11.1856	0.000824345	0.0016864
Alpha	ENSG00000184517	ZFP1	-0.473545	2.94987	11.1406	0.000844583	0.00172474
Alpha	ENSG00000157657	ZNF618	-0.330212	5.13489	11.0693	0.000877672	0.00178756
Alpha	ENSG00000140632	GLYR1	-0.207979	5.20417	11.0609	0.000881669	0.00179525
Alpha	ENSG00000155592	ZKSCAN2	-0.542859	2.52037	11.0243	0.000899251	0.00182898
Alpha	ENSG00000181827	RFX7	-0.415335	3.46257	10.9736	0.000924181	0.00187566
Alpha	ENSG00000095794	CREM	0.327164	4.61833	10.9218	0.000950393	0.00192574
Alpha	ENSG00000243678	NME2	0.437147	2.7644	10.8985	0.00096241	0.00194786
Alpha	ENSG00000117595	IRF6	0.337715	3.59083	10.896	0.000963714	0.00195026
Alpha	ENSG00000120963	ZNF706	0.225731	6.91935	10.8601	0.000982578	0.00198619
Alpha	ENSG00000184939	ZFP90	-0.28402	4.48193	10.8407	0.000992918	0.00200509
Alpha	ENSG00000104221	BRF2	0.343451	3.62425	10.8221	0.00100297	0.0020236
Alpha	ENSG00000167528	ZNF641	-0.400544	3.19134	10.8106	0.00100922	0.0020352
Alpha	ENSG00000146757	ZNF92	0.283702	3.78395	10.7681	0.00103266	0.00207909
Alpha	ENSG00000160113	NR2F6	0.407637	5.66101	10.7653	0.00103421	0.00208119
Alpha	ENSG00000127081	ZNF484	-0.40692	2.50432	10.6951	0.00107419	0.00215734
Alpha	ENSG00000083814	ZNF671	-0.494659	2.17727	10.6721	0.00108763	0.00218191
Alpha	ENSG00000170608	FOXA3	0.367761	4.66191	10.6539	0.00109837	0.00220205
Alpha	ENSG00000126804	ZBTB1	0.301464	4.31813	10.6289	0.00111332	0.00222981
Alpha	ENSG00000213973	ZNF99	1.23882	-0.0928039	10.5954	0.00113367	0.00226832
Alpha	ENSG00000160685	ZBTB7B	0.487197	2.29352	10.3857	0.00126993	0.00251972
Alpha	ENSG00000258405	ZNF578	0.738862	1.62361	10.3684	0.00128194	0.0025423
Alpha	ENSG00000136944	LMX1B	1.13162	0.075798	10.3494	0.00129514	0.00256691
Alpha	ENSG00000028277	POU2F2	0.522057	2.36219	10.3402	0.00130163	0.00257851
Alpha	ENSG00000196700	ZNF512B	-0.339087	3.63809	10.2961	0.00133314	0.00263607
Alpha	ENSG00000126733	DACH2	0.512893	2.70893	10.118	0.00146827	0.00288525
Alpha	ENSG00000167554	ZNF610	0.578746	1.73986	10.08	0.00149885	0.00294319
Alpha	ENSG00000083812	ZNF324	-0.353929	3.22004	9.96859	0.00159234	0.00311427
Alpha	ENSG00000197134	ZNF257	0.688254	1.45386	9.96309	0.0015971	0.00312283
Alpha	ENSG00000119866	BCL11A	0.352485	4.13051	9.96189	0.00159814	0.00312411
Alpha	ENSG00000171056	SOX7	1.31283	0.0305911	9.92794	0.00162789	0.00317841
Alpha	ENSG00000005801	ZNF195	0.247868	4.31317	9.85373	0.00169487	0.00329883
Alpha	ENSG00000168916	ZNF608	0.244357	5.37465	9.80418	0.00174116	0.0033832
Alpha	ENSG00000102974	CTCF	0.241282	5.40467	9.80166	0.00174354	0.00338701
Alpha	ENSG00000204060	FOXO6	0.537924	1.80125	9.75005	0.00179318	0.003478
Alpha	ENSG00000089775	ZBTB25	-0.372232	2.84609	9.73914	0.00180386	0.00349661
Alpha	ENSG00000198795	ZNF521	0.910798	0.73051	9.71984	0.00182289	0.00353054
Alpha	ENSG00000197483	ZNF628	0.532632	1.72017	9.71138	0.0018313	0.00354598
Alpha	ENSG00000185513	L3MBTL1	-0.370254	2.56215	9.69601	0.00184668	0.00357362
Alpha	ENSG00000196391	ZNF774	-0.458615	1.6819	9.62566	0.00191878	0.00370203
Alpha	ENSG00000174796	THAP6	-0.323597	3.88557	9.61142	0.00193371	0.00372952
Alpha	ENSG00000196705	ZNF431	0.302155	5.07317	9.50125	0.00205332	0.00394325
Alpha	ENSG00000069667	RORA	0.329146	4.38647	9.48278	0.00207409	0.00397982
Alpha	ENSG00000183734	ASCL2	-0.330918	6.08647	9.4728	0.00208541	0.00399868
Alpha	ENSG00000178935	ZNF552	0.451512	3.21135	9.46496	0.00209434	0.00401533
Alpha	ENSG00000171467	ZNF318	-0.34009	3.44822	9.41581	0.00215122	0.00411608
Alpha	ENSG00000196110	ZNF699	-0.450483	1.91693	9.37279	0.0022023	0.00420982
Alpha	ENSG00000218891	ZNF579	-0.269889	4.01726	9.3193	0.00226753	0.00432529
Alpha	ENSG00000147421	HMBOX1	0.212036	4.44657	9.25436	0.00234936	0.00447029
Alpha	ENSG00000147789	ZNF7	0.260329	3.9556	9.20334	0.00241574	0.00458957
Alpha	ENSG00000036549	ZZZ3	-0.176018	5.14768	9.16045	0.00247302	0.00469182
Alpha	ENSG00000078900	TP73	1.08465	0.0681794	9.04295	0.0026371	0.00498431
Alpha	ENSG00000198464	ZNF480	0.279676	3.85914	9.04225	0.00263811	0.00498563
Alpha	ENSG00000177873	ZNF619	0.695678	1.07667	9.0321	0.00265279	0.00501156
Alpha	ENSG00000160336	ZNF761	-0.293671	3.08024	9.00108	0.00269821	0.00509087
Alpha	ENSG00000188785	ZNF548	0.317293	3.12599	8.91677	0.00282564	0.00531392
Alpha	ENSG00000121864	ZNF639	0.265569	4.46223	8.89395	0.00286118	0.00537761
Alpha	ENSG00000117000	RLF	0.306446	4.66106	8.81444	0.00298857	0.00560009
Alpha	ENSG00000254004	ZNF260	0.238991	3.97901	8.79005	0.00302878	0.00567149
Alpha	ENSG00000169635	HIC2	0.327642	3.42036	8.78279	0.00304086	0.00569279
Alpha	ENSG00000030419	IKZF2	0.538818	1.71678	8.68027	0.00321674	0.00600119
Alpha	ENSG00000125817	CENPB	-0.248284	4.53073	8.67011	0.00323471	0.00602984
Alpha	ENSG00000198939	ZFP2	-0.649796	0.923809	8.66183	0.00324944	0.0060552
Alpha	ENSG00000165891	E2F7	1.23764	0.063049	8.63761	0.00329293	0.00613057
Alpha	ENSG00000085274	MYNN	0.386283	3.82176	8.63289	0.00330148	0.00614508
Alpha	ENSG00000066697	MSANTD3	-0.217871	4.03477	8.61234	0.00333893	0.00620977
Alpha	ENSG00000122859	NEUROG3	-0.6121	2.61604	8.58346	0.00339231	0.00630178
Alpha	ENSG00000173276	ZBTB21	0.360194	3.90533	8.551	0.00345333	0.00640703
Alpha	ENSG00000220201	ZGLP1	-0.587233	1.02369	8.50893	0.00353407	0.00654705
Alpha	ENSG00000263002	ZNF234	0.392327	2.74846	8.39208	0.00376859	0.00695518
Alpha	ENSG00000256087	ZNF432	0.322125	2.85456	8.35102	0.00385471	0.00710842
Alpha	ENSG00000159140	SON	-0.189193	8.00498	8.32841	0.00390299	0.00719171
Alpha	ENSG00000196214	ZNF766	0.247464	4.14953	8.32419	0.00391206	0.0072076
Alpha	ENSG00000196275	GTF2IRD2	-0.307165	3.62052	8.22866	0.0041234	0.00756762
Alpha	ENSG00000120837	NFYB	0.221661	4.94699	8.19998	0.00418909	0.0076777
Alpha	ENSG00000112365	ZBTB24	-0.243521	3.48583	8.19423	0.00420237	0.00770117
Alpha	ENSG00000177946	CENPBD1	-0.321183	3.27031	8.17421	0.00424901	0.00778045
Alpha	ENSG00000185219	ZNF445	-0.249548	4.27427	8.11514	0.0043897	0.00802442
Alpha	ENSG00000112511	PHF1	-0.303512	3.56366	8.07185	0.00449583	0.0082082
Alpha	ENSG00000101412	E2F1	0.581647	1.56187	8.06759	0.0045064	0.00822472
Alpha	ENSG00000197782	ZNF780A	-0.271077	2.96467	8.04037	0.00457461	0.00834354
Alpha	ENSG00000186350	RXRA	-0.246153	4.20501	7.98716	0.00471102	0.00857586
Alpha	ENSG00000188283	ZNF383	-0.3042	2.71747	7.92441	0.00487723	0.00885537
Alpha	ENSG00000011451	WIZ	0.311723	3.2294	7.87767	0.00500489	0.00906788
Alpha	ENSG00000186812	ZNF397	0.221906	4.89705	7.82962	0.00513969	0.00930064
Alpha	ENSG00000151623	NR3C2	0.410199	2.00362	7.82743	0.00514591	0.00930981
Alpha	ENSG00000223547	ZNF844	0.246791	3.91324	7.79348	0.00524352	0.00947608
Alpha	ENSG00000136936	XPA	-0.165636	5.23014	7.7217	0.00545609	0.00982365
Alpha	ENSG00000144026	ZNF514	-0.274983	3.48584	7.71462	0.00547755	0.00985958
Alpha	ENSG00000180855	ZNF443	0.5212	1.76098	7.69524	0.00553665	0.0099587
Alpha	ENSG00000106948	AKNA	-0.630232	0.992939	7.68517	0.00556764	0.0100066
Alpha	ENSG00000187792	ZNF70	0.531883	1.57842	7.65578	0.00565909	0.0101597
Alpha	ENSG00000158055	GRHL3	0.980077	0.0781422	7.64162	0.00570368	0.0102329
Alpha	ENSG00000151500	THYN1	0.165069	5.70028	7.60975	0.00580534	0.010398
Alpha	ENSG00000112182	BACH2	-0.581222	1.95899	7.57011	0.00593442	0.0106068
Alpha	ENSG00000113580	NR3C1	0.265788	5.28236	7.5675	0.005943	0.0106198
Alpha	ENSG00000154727	GABPA	0.242552	3.79941	7.56517	0.00595072	0.0106324
Alpha	ENSG00000167981	ZNF597	0.5681	1.20468	7.55838	0.00597318	0.0106713
Alpha	ENSG00000121417	ZNF211	-0.386709	2.31813	7.52343	0.00609015	0.0108677
Alpha	ENSG00000198105	ZNF248	-0.252061	4.4892	7.5161	0.006115	0.0109078
Alpha	ENSG00000107175	CREB3	0.263921	4.86335	7.50896	0.0061393	0.0109463
Alpha	ENSG00000197808	ZNF461	-0.41262	1.62264	7.46221	0.00630075	0.0112131
Alpha	ENSG00000205250	E2F4	0.219067	3.83474	7.4475	0.00635247	0.0112952
Alpha	ENSG00000100644	HIF1A	-0.161727	5.7294	7.42132	0.00644556	0.0114519
Alpha	ENSG00000197016	ZNF470	-0.441163	1.93475	7.39127	0.00655411	0.0116352
Alpha	ENSG00000198824	CHAMP1	0.265738	3.374	7.38529	0.00657596	0.0116695
Alpha	ENSG00000081386	ZNF510	-0.268116	3.21065	7.30202	0.00688769	0.0121732
Alpha	ENSG00000122386	ZNF205	0.223596	3.69294	7.27042	0.00700995	0.0123743
Alpha	ENSG00000167081	PBX3	-0.234472	3.49451	7.25627	0.0070654	0.0124668
Alpha	ENSG00000196417	ZNF765	-0.291053	3.29141	7.17914	0.00737559	0.0129603
Alpha	ENSG00000151322	NPAS3	-0.313613	3.11829	7.17151	0.00740704	0.0130099
Alpha	ENSG00000186446	ZNF501	0.522307	1.74864	7.16018	0.00745398	0.0130823
Alpha	ENSG00000130751	NPAS1	-0.576578	0.38642	7.08369	0.00777887	0.0136038
Alpha	ENSG00000118058	KMT2A	-0.204927	6.63292	7.01443	0.00808553	0.0141064
Alpha	ENSG00000172059	KLF11	0.224305	3.97497	7.00367	0.0081343	0.0141838
Alpha	ENSG00000197961	ZNF121	0.258951	3.81913	6.98031	0.00824115	0.0143578
Alpha	ENSG00000081665	ZNF506	-0.218027	4.67845	6.85566	0.00883611	0.015315
Alpha	ENSG00000104976	SNAPC2	-0.238739	3.66366	6.85433	0.00884265	0.0153247
Alpha	ENSG00000127903	ZNF835	0.477169	1.93258	6.82776	0.00897518	0.0155393
Alpha	ENSG00000183647	ZNF530	-0.740007	0.268603	6.82507	0.00898868	0.0155592
Alpha	ENSG00000117010	ZNF684	0.373655	2.2222	6.8249	0.00898954	0.0155592
Alpha	ENSG00000025156	HSF2	-0.207092	4.22245	6.82326	0.00899779	0.0155701
Alpha	ENSG00000186020	ZNF529	-0.271104	3.25256	6.80094	0.00911099	0.0157508
Alpha	ENSG00000121413	ZSCAN18	-0.152684	5.6468	6.76857	0.00927774	0.0160134
Alpha	ENSG00000197008	ZNF138	0.265979	3.65943	6.75345	0.00935667	0.016141
Alpha	ENSG00000122482	ZNF644	0.225217	6.00005	6.714	0.00956591	0.0164808
Alpha	ENSG00000070444	MNT	-0.28939	3.50558	6.69179	0.00968579	0.0166767
Alpha	ENSG00000111206	FOXM1	1.05845	1.14638	6.67961	0.00975218	0.0167856
Alpha	ENSG00000163848	ZNF148	-0.173772	5.77868	6.60394	0.0101753	0.0174618
Alpha	ENSG00000065978	YBX1	0.172074	8.54687	6.59167	0.0102457	0.0175733
Alpha	ENSG00000179348	GATA2	1.91616	-0.0285559	6.56733	0.0103867	0.0177982
Alpha	ENSG00000198440	ZNF583	-0.261757	3.28209	6.53605	0.010571	0.0180871
Alpha	ENSG00000177853	ZNF518A	-0.213163	6.06944	6.46773	0.0109851	0.0187498
Alpha	ENSG00000213967	ZNF726	-0.415787	2.0227	6.45706	0.0110512	0.0188547
Alpha	ENSG00000168769	TET2	-0.257855	4.88301	6.42741	0.0112372	0.0191457
Alpha	ENSG00000180257	ZNF816	0.355454	2.11369	6.42313	0.0112644	0.0191879
Alpha	ENSG00000169131	ZNF354A	0.268875	3.29512	6.37561	0.01157	0.0196753
Alpha	ENSG00000102189	EEA1	-0.16453	5.42561	6.34222	0.0117897	0.0200237
Alpha	ENSG00000196247	ZNF107	-0.411057	2.8738	6.32258	0.011921	0.0202339
Alpha	ENSG00000212993	POU5F1B	1.10678	-0.238698	6.30085	0.012068	0.020464
Alpha	ENSG00000170949	ZNF160	0.205315	4.08212	6.28254	0.0121934	0.0206577
Alpha	ENSG00000135457	TFCP2	0.257909	3.78781	6.2593	0.0123543	0.0209099
Alpha	ENSG00000176182	MYPOP	-0.289368	2.25883	6.25507	0.0123838	0.0209512
Alpha	ENSG00000177485	ZBTB33	0.292148	3.02431	6.25384	0.0123925	0.0209614
Alpha	ENSG00000153560	UBP1	0.221037	3.99242	6.25035	0.0124169	0.0209983
Alpha	ENSG00000198093	ZNF649	0.277747	3.49702	6.23236	0.0125436	0.0212
Alpha	ENSG00000186130	ZBTB6	-0.340454	2.65052	6.17083	0.0129873	0.0218805
Alpha	ENSG00000185869	ZNF829	0.428397	1.95421	6.16441	0.0130346	0.0219578
Alpha	ENSG00000278318	ZNF229	0.46249	2.02809	6.15707	0.0130888	0.0220467
Alpha	ENSG00000109320	NFKB1	0.29085	4.34643	6.14212	0.0131999	0.022213
Alpha	ENSG00000160229	ZNF66	0.54444	1.71419	6.10977	0.0134437	0.0226069
Alpha	ENSG00000117707	PROX1	0.255762	6.70274	6.10427	0.0134856	0.0226632
Alpha	ENSG00000249709	ZNF564	0.564546	0.915147	6.09353	0.0135678	0.0227799
Alpha	ENSG00000130544	ZNF557	0.321562	2.90523	5.99699	0.0143303	0.0239655
Alpha	ENSG00000175105	ZNF654	-0.239223	3.7456	5.99647	0.0143345	0.02397
Alpha	ENSG00000160007	ARHGAP35	-0.217725	4.55031	5.99475	0.0143485	0.0239909
Alpha	ENSG00000151612	ZNF827	-0.241468	4.72946	5.95492	0.0146763	0.0244782
Alpha	ENSG00000163320	CGGBP1	0.150903	5.51915	5.92193	0.0149535	0.0248892
Alpha	ENSG00000126767	ELK1	0.286378	2.98822	5.89495	0.0151844	0.0252292
Alpha	ENSG00000169136	ATF5	0.300225	3.91933	5.87706	0.0153395	0.0254632
Alpha	ENSG00000074657	ZNF532	0.344155	3.59652	5.85798	0.0155066	0.0257037
Alpha	ENSG00000170396	ZNF804A	0.503866	0.815309	5.85017	0.0155756	0.0258127
Alpha	ENSG00000147124	ZNF41	-0.506046	1.22538	5.84263	0.0156424	0.0259102
Alpha	ENSG00000166987	MBD6	0.216798	3.97508	5.81942	0.0158502	0.0262247
Alpha	ENSG00000197714	ZNF460	0.286994	3.01739	5.77055	0.016297	0.0269198
Alpha	ENSG00000151789	ZNF385D	0.927673	0.0119487	5.76126	0.0163833	0.0270514
Alpha	ENSG00000176472	ZNF575	-0.823587	-0.352612	5.70844	0.0168835	0.0278091
Alpha	ENSG00000164011	ZNF691	0.329955	2.81045	5.69925	0.0169722	0.0279479
Alpha	ENSG00000075407	ZNF37A	-0.177972	5.41283	5.64965	0.0174588	0.0286777
Alpha	ENSG00000174428	GTF2IRD2B	-0.342302	2.62881	5.61564	0.0178009	0.0291743
Alpha	ENSG00000159917	ZNF235	0.405139	1.62155	5.55645	0.0184127	0.0301128
Alpha	ENSG00000184481	FOXO4	0.501386	1.65652	5.52835	0.0187107	0.0305568
Alpha	ENSG00000105866	SP4	-0.253931	3.50026	5.50156	0.0189995	0.030997
Alpha	ENSG00000119725	ZNF410	0.552724	0.802194	5.49699	0.0190492	0.0310688
Alpha	ENSG00000118513	MYB	0.770143	0.270619	5.46097	0.0194459	0.0316805
Alpha	ENSG00000166860	ZBTB39	0.399096	2.01994	5.45977	0.0194592	0.0316959
Alpha	ENSG00000153879	CEBPG	0.240465	4.03919	5.454	0.0195236	0.0317911
Alpha	ENSG00000166349	RAG1	1.11192	-0.466341	5.44182	0.0196601	0.031994
Alpha	ENSG00000120693	SMAD9	0.629906	2.20448	5.43169	0.0197745	0.0321737
Alpha	ENSG00000196387	ZNF140	0.220865	3.51808	5.41905	0.0199182	0.0323944
Alpha	ENSG00000086102	NFX1	0.180861	4.22085	5.39723	0.0201688	0.0327722
Alpha	ENSG00000205189	ZBTB10	0.273313	5.84289	5.34857	0.0207393	0.0336316
Alpha	ENSG00000275111	ZNF2	-0.366661	1.55295	5.28181	0.0215493	0.0348611
Alpha	ENSG00000111424	VDR	-1.1465	-0.737597	5.24397	0.022023	0.0355633
Alpha	ENSG00000162419	GMEB1	0.218921	3.58405	5.22609	0.0222505	0.0358947
Alpha	ENSG00000152433	ZNF547	0.431242	1.51613	5.22063	0.0223205	0.0359932
Alpha	ENSG00000128000	ZNF780B	-0.274368	3.36687	5.20532	0.0225178	0.0362789
Alpha	ENSG00000213799	ZNF845	0.504389	1.26689	5.10386	0.0238726	0.0382973
Alpha	ENSG00000158691	ZSCAN12	0.312073	2.5054	5.09555	0.0239872	0.0384544
Alpha	ENSG00000164330	EBF1	0.670963	0.531894	5.07389	0.0242888	0.0388799
Alpha	ENSG00000144747	TMF1	0.162012	6.03082	5.05041	0.0246201	0.0393517
Alpha	ENSG00000059728	MXD1	0.327457	4.95744	5.05004	0.0246254	0.0393563
Alpha	ENSG00000139651	ZNF740	0.285183	3.01847	5.04918	0.0246375	0.0393718
Alpha	ENSG00000197024	ZNF398	-0.220917	3.14636	5.01784	0.0250875	0.0400116
Alpha	ENSG00000140396	NCOA2	0.213796	4.1793	5.01376	0.0251467	0.0400901
Alpha	ENSG00000103199	ZNF500	0.27985	2.85277	4.96802	0.0258201	0.0410908
Alpha	ENSG00000179195	ZNF664	0.143756	5.25698	4.95462	0.0260211	0.0413698
Alpha	ENSG00000185252	ZNF74	0.243487	2.74083	4.95143	0.026069	0.0414379
Alpha	ENSG00000167962	ZNF598	0.234116	2.89381	4.93666	0.0262929	0.0417567
Alpha	ENSG00000196597	ZNF782	0.456785	2.13285	4.87887	0.0271874	0.0430714
Alpha	ENSG00000100426	ZBED4	0.248004	3.2932	4.81818	0.028161	0.0444829
Alpha	ENSG00000167840	ZNF232	0.300997	2.73071	4.8158	0.0282	0.0445271
Alpha	ENSG00000095951	HIVEP1	0.280714	3.62713	4.80137	0.0284371	0.044846
Alpha	ENSG00000234444	ZNF736	0.288389	2.83754	4.71294	0.0299364	0.0470067
Alpha	ENSG00000175787	ZNF169	0.575154	0.741487	4.68908	0.0303549	0.047599
Alpha	ENSG00000158805	ZNF276	-0.236303	3.33489	4.68654	0.0303998	0.0476602
Alpha	ENSG00000131381	RBSN	0.242081	3.31445	4.68466	0.0304332	0.0477079
Alpha	ENSG00000171827	ZNF570	-0.208575	3.28676	4.63148	0.0313904	0.0490655
Alpha	ENSG00000124782	RREB1	0.167432	4.47816	4.61688	0.0316589	0.0494373
Alpha	ENSG00000143157	POGK	-0.145173	4.49035	4.59909	0.0319889	0.0498851
Beta	ENSG00000114315	HES1	4.22683	6.70326	1515.55	0	0
Beta	ENSG00000084093	REST	4.023	5.14453	1783.05	0	0
Beta	ENSG00000169856	ONECUT1	5.57657	5.01078	1668.41	0	0
Beta	ENSG00000135374	ELF5	6.12707	4.58599	1386.09	2.21767e-303	1.38103e-300
Beta	ENSG00000185022	MAFF	3.77919	5.72883	1327.09	1.46473e-290	7.69625e-288
Beta	ENSG00000182759	MAFA	-5.16278	5.9619	1316.17	3.46477e-288	1.71343e-285
Beta	ENSG00000134323	MYCN	-4.14916	2.86793	1181.01	8.19129e-259	2.86934e-256
Beta	ENSG00000168214	RBPJ	3.78389	8.89092	1117.39	5.47349e-245	1.58675e-242
Beta	ENSG00000177426	TGIF1	4.5554	4.82346	1110.7	1.56176e-243	4.37657e-241
Beta	ENSG00000188290	HES4	3.49098	4.98068	1059.78	1.82347e-232	4.57608e-230
Beta	ENSG00000134138	MEIS2	-2.23669	8.83067	1007.76	3.6875e-221	7.94892e-219
Beta	ENSG00000149948	HMGA2	4.1	5.31351	990.713	1.87482e-217	3.75276e-215
Beta	ENSG00000060138	YBX3	3.25585	6.62978	975.287	4.22784e-214	7.81175e-212
Beta	ENSG00000136997	MYC	4.76864	4.67701	967.127	2.51048e-212	4.58817e-210
Beta	ENSG00000144331	ZNF385B	4.91427	4.01833	966.441	3.53834e-212	6.39716e-210
Beta	ENSG00000118495	PLAGL1	-3.61627	8.42689	943.575	3.30711e-207	5.73256e-205
Beta	ENSG00000152804	HHEX	4.82996	5.37776	909.115	1.02407e-199	1.56534e-197
Beta	ENSG00000168267	PTF1A	6.17397	4.92265	907.533	2.26064e-199	3.39379e-197
Beta	ENSG00000125398	SOX9	5.22447	5.71055	891.962	5.4846e-196	7.62133e-194
Beta	ENSG00000074219	TEAD2	3.901	4.09465	807.977	9.94923e-178	1.07235e-175
Beta	ENSG00000166949	SMAD3	4.03054	3.62899	795.993	4.01176e-175	4.18967e-173
Beta	ENSG00000172818	OVOL1	4.83365	3.31982	739.916	6.25221e-163	5.84026e-161
Beta	ENSG00000163435	ELF3	2.80495	6.60257	702.221	9.83208e-155	7.98631e-153
Beta	ENSG00000116833	NR5A2	3.52058	5.28696	691.507	2.10198e-152	1.64384e-150
Beta	ENSG00000118707	TGIF2	2.65245	4.0821	684.393	7.4057e-151	5.7119e-149
Beta	ENSG00000152284	TCF7L1	4.42445	3.93697	668.036	2.67192e-147	1.92814e-145
Beta	ENSG00000221869	CEBPD	3.03744	5.53906	655.859	1.18832e-144	8.39511e-143
Beta	ENSG00000063438	AHRR	-4.76856	1.71501	650.378	1.84929e-143	1.26398e-141
Beta	ENSG00000163623	NKX6-1	-1.69997	5.72093	605.821	9.07224e-134	5.27822e-132
Beta	ENSG00000172216	CEBPB	2.23861	5.2164	574.534	5.79478e-127	2.97961e-125
Beta	ENSG00000135373	EHF	3.38031	4.81708	539.271	2.71609e-119	1.27565e-117
Beta	ENSG00000141448	GATA6	2.18021	4.97163	504.185	1.16813e-111	4.72137e-110
Beta	ENSG00000124232	RBPJL	5.22953	6.23102	503.797	1.41836e-111	5.71904e-110
Beta	ENSG00000136574	GATA4	5.08016	2.77556	487.73	4.44476e-108	1.72198e-106
Beta	ENSG00000175329	ISX	-3.61386	2.4637	482.102	7.45177e-107	2.83471e-105
Beta	ENSG00000007866	TEAD3	3.60594	2.80056	459.451	6.33057e-102	2.25992e-100
Beta	ENSG00000148737	TCF7L2	2.49909	5.0512	458.452	1.04406e-101	3.71137e-100
Beta	ENSG00000163909	HEYL	3.97592	2.65313	452.511	2.04929e-100	7.16358e-99
Beta	ENSG00000170549	IRX1	4.40912	2.09806	437.68	3.46215e-97	1.15961e-95
Beta	ENSG00000170485	NPAS2	4.91219	3.71644	426.633	8.78241e-95	2.83431e-93
Beta	ENSG00000009950	MLXIPL	-1.97048	5.52124	425.975	1.22159e-94	3.93483e-93
Beta	ENSG00000115112	TFCP2L1	-2.68875	2.90266	403.008	1.21939e-89	3.62241e-88
Beta	ENSG00000113580	NR3C1	-1.75481	5.64535	398.529	1.1514e-88	3.34363e-87
Beta	ENSG00000188070	C11orf95	-1.68127	4.27756	389.992	8.30887e-87	2.33231e-85
Beta	ENSG00000004848	ARX	5.054	4.14236	384.905	1.06446e-85	2.92928e-84
Beta	ENSG00000109787	KLF3	1.56833	5.60274	379.82	1.36213e-84	3.694e-83
Beta	ENSG00000083307	GRHL2	3.95789	3.0527	374.642	1.82573e-83	4.78906e-82
Beta	ENSG00000164684	ZNF704	2.04434	5.58317	367.426	6.80106e-82	1.73e-80
Beta	ENSG00000109906	ZBTB16	4.0705	2.46031	361.54	1.30067e-80	3.19263e-79
Beta	ENSG00000137166	FOXP4	-1.15673	5.15665	359.288	4.02459e-80	9.77881e-79
Beta	ENSG00000179981	TSHZ1	-1.1451	4.89515	357.389	1.0427e-79	2.52259e-78
Beta	ENSG00000127152	BCL11B	3.71691	2.66438	355.221	3.09213e-79	7.40613e-78
Beta	ENSG00000067066	SP100	2.55564	3.41972	354.933	3.57243e-79	8.54436e-78
Beta	ENSG00000116016	EPAS1	2.28218	3.8745	352.278	1.35225e-78	3.21141e-77
Beta	ENSG00000173404	INSM1	-2.24741	6.96774	349.458	5.56026e-78	1.30028e-76
Beta	ENSG00000106536	POU6F2	3.77561	2.53348	348.654	8.32053e-78	1.93501e-76
Beta	ENSG00000197905	TEAD4	5.88988	1.86682	348.498	8.99756e-78	2.08957e-76
Beta	ENSG00000177045	SIX5	2.55537	3.00127	333.974	1.31006e-74	2.83127e-73
Beta	ENSG00000162599	NFIA	1.996	4.83104	327.469	3.41936e-73	7.18664e-72
Beta	ENSG00000183734	ASCL2	-1.8365	6.52456	325.389	9.70705e-73	2.02248e-71
Beta	ENSG00000175592	FOSL1	3.17759	1.27035	315.07	1.71679e-70	3.42016e-69
Beta	ENSG00000126733	DACH2	-2.86079	3.18967	315.011	1.76851e-70	3.51901e-69
Beta	ENSG00000148200	NR6A1	1.71338	4.00605	312.687	5.67448e-70	1.12248e-68
Beta	ENSG00000198046	ZNF667	-1.07546	4.37697	307.887	6.30363e-69	1.21967e-67
Beta	ENSG00000075426	FOSL2	2.65083	3.43979	305.744	1.84654e-68	3.54023e-67
Beta	ENSG00000178573	MAF	-2.49036	3.61281	296.127	2.29964e-66	4.24903e-65
Beta	ENSG00000105722	ERF	1.64143	3.77672	295.365	3.37012e-66	6.18615e-65
Beta	ENSG00000186350	RXRA	-1.01972	4.30403	287.106	2.12385e-64	3.74716e-63
Beta	ENSG00000196132	MYT1	-1.73828	3.45413	285.323	5.19518e-64	9.10863e-63
Beta	ENSG00000101057	MYBL2	3.16397	2.2318	279.487	9.71521e-63	1.66515e-61
Beta	ENSG00000116017	ARID3A	-0.887865	5.91036	277.624	2.47339e-62	4.18807e-61
Beta	ENSG00000165495	PKNOX2	3.89051	1.78123	273.066	2.43593e-61	4.02731e-60
Beta	ENSG00000151090	THRB	4.16614	1.58599	266.23	7.52712e-60	1.2088e-58
Beta	ENSG00000170396	ZNF804A	-3.40143	1.1648	265.73	9.67174e-60	1.54582e-58
Beta	ENSG00000142611	PRDM16	2.54193	3.63574	263.123	3.57882e-59	5.65017e-58
Beta	ENSG00000186487	MYT1L	-2.25027	3.89629	258.477	3.68503e-58	5.71061e-57
Beta	ENSG00000128573	FOXP2	-2.96288	4.41265	257.791	5.20164e-58	8.0092e-57
Beta	ENSG00000147862	NFIB	1.47152	5.36093	252.762	6.49175e-57	9.70243e-56
Beta	ENSG00000275410	HNF1B	2.09238	4.22508	250.473	2.04811e-56	3.02609e-55
Beta	ENSG00000134532	SOX5	-1.44491	3.87025	250.469	2.05259e-56	3.03005e-55
Beta	ENSG00000158055	GRHL3	-3.07969	0.313431	250.222	2.32351e-56	3.42398e-55
Beta	ENSG00000050344	NFE2L3	2.39066	3.22379	248.676	5.04808e-56	7.37431e-55
Beta	ENSG00000171940	ZNF217	1.90415	3.65702	248.507	5.49435e-56	8.01927e-55
Beta	ENSG00000099326	MZF1	-1.39165	4.73265	245.364	2.66229e-55	3.83252e-54
Beta	ENSG00000198517	MAFK	2.11305	3.01414	242.357	1.20435e-54	1.70167e-53
Beta	ENSG00000198963	RORB	-3.33731	0.273639	242.211	1.29619e-54	1.8299e-53
Beta	ENSG00000276644	DACH1	-1.45583	4.93334	239.958	4.01648e-54	5.60441e-53
Beta	ENSG00000197044	ZNF441	-1.11456	3.56807	239.594	4.82174e-54	6.70577e-53
Beta	ENSG00000121454	LHX4	-3.21772	2.44895	239.124	6.10464e-54	8.46195e-53
Beta	ENSG00000213347	MXD3	2.61824	2.27754	236.255	2.57868e-53	3.50225e-52
Beta	ENSG00000007372	PAX6	-2.83198	8.11028	235.624	3.5394e-53	4.79545e-52
Beta	ENSG00000214717	ZBED1	1.21935	4.86539	228.649	1.17481e-51	1.51598e-50
Beta	ENSG00000143067	ZNF697	-1.45125	2.8158	226.899	2.82906e-51	3.60908e-50
Beta	ENSG00000204103	MAFB	-2.6601	8.55396	226.333	3.75997e-51	4.78941e-50
Beta	ENSG00000185630	PBX1	0.92413	6.51479	222.597	2.45403e-50	3.03844e-49
Beta	ENSG00000196628	TCF4	-1.3324	5.43865	218.871	1.59477e-49	1.92218e-48
Beta	ENSG00000123358	NR4A1	1.50301	6.80934	218.073	2.38029e-49	2.84856e-48
Beta	ENSG00000138738	PRDM5	1.91331	2.95591	216.151	6.25103e-49	7.40697e-48
Beta	ENSG00000105261	OVOL3	-4.16254	-0.469934	213.273	2.65384e-48	3.09015e-47
Beta	ENSG00000185669	SNAI3	4.62861	1.01149	212.132	4.70776e-48	5.44404e-47
Beta	ENSG00000170608	FOXA3	1.28573	4.47808	209.772	1.54011e-47	1.75324e-46
Beta	ENSG00000113916	BCL6	3.64251	2.70764	206.162	9.44737e-47	1.05547e-45
Beta	ENSG00000162676	GFI1	5.35741	0.67265	202.446	6.11131e-46	6.70728e-45
Beta	ENSG00000150907	FOXO1	-1.57668	5.22377	201.95	7.83989e-46	8.57087e-45
Beta	ENSG00000118263	KLF7	-1.58596	3.82435	200.678	1.48534e-45	1.61022e-44
Beta	ENSG00000198300	PEG3	-1.13639	5.49583	200.676	1.48682e-45	1.61079e-44
Beta	ENSG00000187098	MITF	3.48433	1.72944	198.826	3.76733e-45	4.03722e-44
Beta	ENSG00000101096	NFATC2	3.07377	1.91477	197.89	6.02934e-45	6.43635e-44
Beta	ENSG00000149922	TBX6	2.35397	2.07509	197.541	7.18709e-45	7.65803e-44
Beta	ENSG00000159216	RUNX1	3.76964	1.44711	196.201	1.40893e-44	1.48618e-43
Beta	ENSG00000102878	HSF4	-2.77397	1.31058	191.769	1.3066e-43	1.34698e-42
Beta	ENSG00000181444	ZNF467	1.94255	2.86017	190.837	2.08706e-43	2.14105e-42
Beta	ENSG00000108924	HLF	-2.02434	1.43101	190.71	2.22547e-43	2.28026e-42
Beta	ENSG00000165804	ZNF219	1.59937	3.23303	190.492	2.48223e-43	2.53716e-42
Beta	ENSG00000102554	KLF5	1.56808	3.63663	187.869	9.28084e-43	9.34419e-42
Beta	ENSG00000140044	JDP2	4.69126	1.26337	187.331	1.21575e-42	1.22259e-41
Beta	ENSG00000173894	CBX2	2.0128	2.77745	185.235	3.48754e-42	3.45956e-41
Beta	ENSG00000260428	SCX	-2.84689	1.55166	184.577	4.85539e-42	4.79662e-41
Beta	ENSG00000162992	NEUROD1	-1.78915	8.15012	184.495	5.05963e-42	4.9896e-41
Beta	ENSG00000198105	ZNF248	-0.839285	4.63176	181.329	2.4845e-41	2.4175e-40
Beta	ENSG00000025434	NR1H3	1.73443	2.52528	176.432	2.91476e-40	2.74559e-39
Beta	ENSG00000178951	ZBTB7A	-0.652876	5.00828	174.673	7.05825e-40	6.60419e-39
Beta	ENSG00000125820	NKX2-2	-1.68069	5.75522	173.304	1.40468e-39	1.29771e-38
Beta	ENSG00000168062	BATF2	3.83583	0.828043	171.771	3.03652e-39	2.77327e-38
Beta	ENSG00000115163	CENPA	5.11001	1.0113	171.474	3.52613e-39	3.2152e-38
Beta	ENSG00000119138	KLF9	3.50975	0.971169	171.032	4.40286e-39	4.00377e-38
Beta	ENSG00000178764	ZHX2	1.95956	3.10612	170.694	5.21865e-39	4.73537e-38
Beta	ENSG00000043039	BARX2	6.21247	0.842346	169.108	1.15859e-38	1.0423e-37
Beta	ENSG00000173258	ZNF483	-1.21983	3.63482	168.548	1.53553e-38	1.37845e-37
Beta	ENSG00000182463	TSHZ2	-1.07796	5.64606	166.202	4.99834e-38	4.43027e-37
Beta	ENSG00000153814	JAZF1	-1.46063	3.53129	165.594	6.78367e-38	5.98743e-37
Beta	ENSG00000119508	NR4A3	2.09209	4.36884	164.686	1.07108e-37	9.39935e-37
Beta	ENSG00000166888	STAT6	1.59606	3.1103	164.635	1.0993e-37	9.63694e-37
Beta	ENSG00000165030	NFIL3	1.06913	4.5864	163.921	1.57369e-37	1.37312e-36
Beta	ENSG00000135100	HNF1A	-1.08863	2.8917	160.745	7.77799e-37	6.6622e-36
Beta	ENSG00000160199	PKNOX1	-0.772492	4.70139	160.622	8.27586e-37	7.07784e-36
Beta	ENSG00000184939	ZFP90	-0.70777	4.62902	159.531	1.43277e-36	1.21732e-35
Beta	ENSG00000129173	E2F8	4.22569	1.43403	159.056	1.81915e-36	1.54014e-35
Beta	ENSG00000148516	ZEB1	-1.61857	3.05829	154.556	1.75097e-35	1.43895e-34
Beta	ENSG00000167685	ZNF444	0.974194	4.4864	154.234	2.05857e-35	1.68843e-34
Beta	ENSG00000150347	ARID5B	-1.28382	5.6854	154.185	2.11037e-35	1.72923e-34
Beta	ENSG00000147488	ST18	-1.64079	4.98781	153.428	3.08798e-35	2.51192e-34
Beta	ENSG00000162772	ATF3	2.57984	8.5592	151.88	6.72927e-35	5.42406e-34
Beta	ENSG00000138378	STAT4	3.54788	0.743819	149.568	2.15462e-34	1.70323e-33
Beta	ENSG00000164683	HEY1	2.05053	4.34873	148.307	4.06447e-34	3.18305e-33
Beta	ENSG00000185404	SP140L	2.40604	1.28795	146.668	9.27362e-34	7.20215e-33
Beta	ENSG00000102984	ZNF821	-1.16311	4.1662	145.083	2.05969e-33	1.58497e-32
Beta	ENSG00000100625	SIX4	2.44021	1.78416	142.977	5.94545e-33	4.51521e-32
Beta	ENSG00000167766	ZNF83	1.3494	4.73615	142.553	7.36154e-33	5.58056e-32
Beta	ENSG00000170903	MSANTD4	-1.10052	4.94842	142.546	7.3889e-33	5.59878e-32
Beta	ENSG00000228623	ZNF883	-0.957083	3.99401	141.555	1.21698e-32	9.1636e-32
Beta	ENSG00000140836	ZFHX3	0.890513	5.47933	141.48	1.26332e-32	9.49548e-32
Beta	ENSG00000077150	NFKB2	1.39843	3.40054	141.221	1.43967e-32	1.07825e-31
Beta	ENSG00000237765	FAM200B	-0.712651	6.37724	141.162	1.4832e-32	1.11035e-31
Beta	ENSG00000101115	SALL4	2.63491	2.05099	139.431	3.54446e-32	2.62309e-31
Beta	ENSG00000134874	DZIP1	-1.29298	3.89944	139.389	3.62046e-32	2.67815e-31
Beta	ENSG00000111206	FOXM1	2.86022	1.21515	138.904	4.62209e-32	3.40262e-31
Beta	ENSG00000123405	NFE2	4.67962	1.10841	138.878	4.6843e-32	3.44691e-31
Beta	ENSG00000139083	ETV6	1.42249	3.52798	137.09	1.15268e-31	8.37922e-31
Beta	ENSG00000174306	ZHX3	-0.934835	3.416	134.664	3.91093e-31	2.79585e-30
Beta	ENSG00000105516	DBP	1.43501	3.10448	132.21	1.34587e-30	9.48029e-30
Beta	ENSG00000109320	NFKB1	0.916614	4.30405	130.777	2.7704e-30	1.92964e-29
Beta	ENSG00000178662	CSRNP3	-0.930519	5.13789	129.64	4.91371e-30	3.39997e-29
Beta	ENSG00000204060	FOXO6	-1.75087	2.12412	127.365	1.54575e-29	1.05523e-28
Beta	ENSG00000029153	ARNTL2	2.89102	1.00361	126.521	2.36538e-29	1.60563e-28
Beta	ENSG00000111269	CREBL2	-0.997791	3.88541	126.298	2.64592e-29	1.79173e-28
Beta	ENSG00000185002	RFX6	-1.43791	5.15608	125.661	3.64805e-29	2.46042e-28
Beta	ENSG00000164749	HNF4G	4.47898	0.41663	125.259	4.46606e-29	3.00851e-28
Beta	ENSG00000167034	NKX3-1	3.12407	0.903972	124.697	5.93018e-29	3.97409e-28
Beta	ENSG00000135148	TRAFD1	-0.69235	3.645	123.78	9.40998e-29	6.25126e-28
Beta	ENSG00000011243	AKAP8L	-0.55904	5.72099	123.769	9.4625e-29	6.28119e-28
Beta	ENSG00000163884	KLF15	3.86833	0.263424	122.754	1.57884e-28	1.04023e-27
Beta	ENSG00000104447	TRPS1	-1.37572	2.40054	122.537	1.76068e-28	1.15686e-27
Beta	ENSG00000182568	SATB1	0.897456	4.92054	122.203	2.08359e-28	1.36743e-27
Beta	ENSG00000103449	SALL1	5.26106	0.0209687	121.722	2.65565e-28	1.73811e-27
Beta	ENSG00000178150	ZNF114	5.23915	0.545385	120.477	4.97359e-28	3.22507e-27
Beta	ENSG00000178187	ZNF454	-0.87257	3.39284	119.893	6.6755e-28	4.31036e-27
Beta	ENSG00000130584	ZBTB46	-1.77164	1.33508	118.405	1.41398e-27	9.02262e-27
Beta	ENSG00000069667	RORA	0.940302	4.25056	117.91	1.81477e-27	1.15451e-26
Beta	ENSG00000072310	SREBF1	-0.889269	3.88126	115.799	5.25999e-27	3.29024e-26
Beta	ENSG00000117000	RLF	0.668166	4.63951	115.083	7.54671e-27	4.68576e-26
Beta	ENSG00000236609	ZNF853	-0.915413	3.4487	114.642	9.42659e-27	5.84004e-26
Beta	ENSG00000090447	TFAP4	1.22639	3.92597	114.156	1.20446e-26	7.43733e-26
Beta	ENSG00000122085	MTERF4	-0.53406	5.15904	112.374	2.95895e-26	1.80325e-25
Beta	ENSG00000131408	NR1H2	0.830949	3.82439	111.659	4.24428e-26	2.5735e-25
Beta	ENSG00000196381	ZNF781	-1.20677	2.9209	110.725	6.79644e-26	4.07544e-25
Beta	ENSG00000126456	IRF3	0.749872	4.80238	110.643	7.0836e-26	4.24612e-25
Beta	ENSG00000170365	SMAD1	0.964419	3.60176	108.941	1.6723e-25	9.90422e-25
Beta	ENSG00000068305	MEF2A	-0.654386	5.16024	107.422	3.59774e-25	2.11808e-24
Beta	ENSG00000165655	ZNF503	2.00778	5.63719	107.352	3.72758e-25	2.19222e-24
Beta	ENSG00000118922	KLF12	-1.24697	3.02791	107.323	3.78304e-25	2.22406e-24
Beta	ENSG00000110693	SOX6	1.09425	5.962	105.24	1.08227e-24	6.26415e-24
Beta	ENSG00000165684	SNAPC4	-0.751978	2.76244	104.622	1.47773e-24	8.49746e-24
Beta	ENSG00000197647	ZNF433	1.13476	3.16346	103.295	2.88764e-24	1.64474e-23
Beta	ENSG00000184517	ZFP1	-0.913268	3.11872	103.091	3.20146e-24	1.82163e-23
Beta	ENSG00000101493	ZNF516	-0.690788	3.64117	102.945	3.44624e-24	1.95893e-23
Beta	ENSG00000184635	ZNF93	1.45744	4.08177	102.688	3.92283e-24	2.22007e-23
Beta	ENSG00000198026	ZNF335	-1.27652	3.30226	102.319	4.72619e-24	2.66397e-23
Beta	ENSG00000144485	HES6	0.918123	4.49056	102.032	5.46403e-24	3.06957e-23
Beta	ENSG00000135625	EGR4	-1.82655	5.33034	101.454	7.31536e-24	4.08639e-23
Beta	ENSG00000189420	ZFP92	-2.13346	-0.359796	101.184	8.38316e-24	4.67355e-23
Beta	ENSG00000169981	ZNF35	-0.888925	3.55356	100.639	1.10369e-23	6.13265e-23
Beta	ENSG00000169989	TIGD4	-1.40679	1.11319	100.189	1.38524e-23	7.66669e-23
Beta	ENSG00000120832	MTERF2	-0.495758	4.82191	99.6351	1.8323e-23	1.00878e-22
Beta	ENSG00000088881	EBF4	-1.26718	2.3335	98.6786	2.96989e-23	1.62287e-22
Beta	ENSG00000104856	RELB	1.46998	1.77601	96.5428	8.73375e-23	4.69317e-22
Beta	ENSG00000141905	NFIC	-0.76778	5.78315	96.4288	9.25128e-23	4.96492e-22
Beta	ENSG00000126603	GLIS2	-0.932917	3.38801	96.4152	9.31512e-23	4.99759e-22
Beta	ENSG00000143578	CREB3L4	0.974411	3.57502	95.982	1.15932e-22	6.20395e-22
Beta	ENSG00000125520	SLC2A4RG	0.795605	5.18345	95.9291	1.1907e-22	6.36376e-22
Beta	ENSG00000221944	TIGD1	-0.930256	2.83615	95.6493	1.37148e-22	7.31138e-22
Beta	ENSG00000171817	ZNF540	-1.13694	2.1687	95.4989	1.47977e-22	7.87618e-22
Beta	ENSG00000078900	TP73	4.41394	0.0318006	95.3675	1.58129e-22	8.40056e-22
Beta	ENSG00000171532	NEUROD2	3.62364	0.064679	95.339	1.60425e-22	8.51715e-22
Beta	ENSG00000187801	ZFP69B	-1.17383	2.02345	95.0024	1.90154e-22	1.00638e-21
Beta	ENSG00000177311	ZBTB38	-0.518201	5.12261	94.9645	1.93832e-22	1.02552e-21
Beta	ENSG00000188313	PLSCR1	0.793405	4.25998	94.6505	2.27145e-22	1.20101e-21
Beta	ENSG00000120784	ZFP30	-0.739443	3.54686	94.5669	2.36943e-22	1.25124e-21
Beta	ENSG00000183779	ZNF703	1.42762	2.51951	93.0731	5.03982e-22	2.6333e-21
Beta	ENSG00000120738	EGR1	1.08639	8.36075	92.6611	6.20605e-22	3.22961e-21
Beta	ENSG00000066136	NFYC	0.54484	4.8912	92.6366	6.28342e-22	3.26886e-21
Beta	ENSG00000120690	ELF1	0.667062	5.42332	91.6732	1.02238e-21	5.28446e-21
Beta	ENSG00000167074	TEF	0.906738	3.18471	91.3594	1.19809e-21	6.17745e-21
Beta	ENSG00000130751	NPAS1	-1.88395	0.478478	91.0297	1.41535e-21	7.28204e-21
Beta	ENSG00000165244	ZNF367	2.82607	0.581325	90.0438	2.32942e-21	1.18616e-20
Beta	ENSG00000140632	GLYR1	-0.502765	5.30282	90.0341	2.34091e-21	1.19129e-20
Beta	ENSG00000198429	ZNF69	1.42595	2.56054	89.9522	2.43986e-21	1.24089e-20
Beta	ENSG00000169297	NR0B1	-2.37876	2.14253	89.3666	3.28024e-21	1.66026e-20
Beta	ENSG00000112658	SRF	1.13131	4.32405	89.349	3.3096e-21	1.67462e-20
Beta	ENSG00000117707	PROX1	0.934442	6.67859	89.2828	3.42214e-21	1.73052e-20
Beta	ENSG00000136367	ZFHX2	-1.00764	2.65044	89.213	3.54508e-21	1.79108e-20
Beta	ENSG00000105419	MEIS3	-2.05018	2.58869	88.8728	4.21041e-21	2.12275e-20
Beta	ENSG00000124782	RREB1	0.821274	4.41803	88.4086	5.32375e-21	2.67125e-20
Beta	ENSG00000025293	PHF20	-0.501892	5.21894	87.7098	7.57965e-21	3.77949e-20
Beta	ENSG00000181315	ZNF322	-0.570128	5.19901	87.3368	9.15295e-21	4.55319e-20
Beta	ENSG00000148411	NACC2	1.86656	1.23179	86.6687	1.28313e-20	6.36607e-20
Beta	ENSG00000081059	TCF7	0.952479	3.29236	85.641	2.15753e-20	1.06072e-19
Beta	ENSG00000153975	ZUFSP	-0.647785	3.67163	85.6099	2.19173e-20	1.07722e-19
Beta	ENSG00000126705	AHDC1	-0.626715	3.82066	84.6365	3.58583e-20	1.74355e-19
Beta	ENSG00000177842	ZNF620	-0.687002	4.15204	84.5654	3.71705e-20	1.80371e-19
Beta	ENSG00000173068	BNC2	2.74488	0.423774	83.9866	4.9814e-20	2.40544e-19
Beta	ENSG00000016082	ISL1	-1.5134	7.87565	83.0826	7.86969e-20	3.77305e-19
Beta	ENSG00000179774	ATOH7	-2.11756	-0.41133	82.7814	9.16503e-20	4.3816e-19
Beta	ENSG00000179456	ZBTB18	0.68372	3.8589	82.4188	1.10102e-19	5.24582e-19
Beta	ENSG00000197472	ZNF695	2.89763	0.790164	82.0602	1.32002e-19	6.2715e-19
Beta	ENSG00000127445	PIN1	-0.636981	6.84386	80.3557	3.12731e-19	1.46551e-18
Beta	ENSG00000162714	ZNF496	1.07297	2.63068	79.8968	3.94488e-19	1.84094e-18
Beta	ENSG00000244405	ETV5	1.58197	1.15439	79.6225	4.53243e-19	2.10811e-18
Beta	ENSG00000129654	FOXJ1	-1.63883	3.37844	79.4849	4.85934e-19	2.25642e-18
Beta	ENSG00000122877	EGR2	1.57186	4.06098	79.0831	5.95529e-19	2.75315e-18
Beta	ENSG00000066697	MSANTD3	-0.668731	4.15691	78.6235	7.51518e-19	3.46382e-18
Beta	ENSG00000184436	THAP7	-0.530649	4.88139	78.4333	8.2745e-19	3.80442e-18
Beta	ENSG00000232237	ASCL5	3.58085	-0.18142	78.0847	9.87147e-19	4.52012e-18
Beta	ENSG00000115415	STAT1	0.749797	4.87276	77.8774	1.09637e-18	5.0066e-18
Beta	ENSG00000175832	ETV4	3.75001	0.17452	77.6222	1.24762e-18	5.68649e-18
Beta	ENSG00000124440	HIF3A	-0.832089	5.22952	77.1724	1.56664e-18	7.10973e-18
Beta	ENSG00000170684	ZNF296	-1.38573	1.06268	77.0728	1.64773e-18	7.46967e-18
Beta	ENSG00000160321	ZNF208	-1.31974	2.41944	76.3221	2.40977e-18	1.08366e-17
Beta	ENSG00000178860	MSC	4.1991	0.186749	75.9432	2.91946e-18	1.30692e-17
Beta	ENSG00000164916	FOXK1	-0.61372	4.02215	75.8871	3.0036e-18	1.34351e-17
Beta	ENSG00000124920	MYRF	0.977805	2.78884	74.8287	5.13388e-18	2.2788e-17
Beta	ENSG00000106624	AEBP1	1.16652	2.45344	74.614	5.72363e-18	2.53522e-17
Beta	ENSG00000257446	ZNF878	5.44827	-0.0747092	74.5612	5.87859e-18	2.6018e-17
Beta	ENSG00000148143	ZNF462	-0.632079	4.40158	73.9801	7.89084e-18	3.47139e-17
Beta	ENSG00000235109	ZSCAN31	0.999824	2.52211	73.5663	9.73129e-18	4.25877e-17
Beta	ENSG00000171223	JUNB	0.933906	8.2073	73.4962	1.00831e-17	4.40928e-17
Beta	ENSG00000028839	TBPL1	-0.641253	4.90501	73.2209	1.15919e-17	5.05331e-17
Beta	ENSG00000157613	CREB3L1	3.14964	0.962743	71.9668	2.18844e-17	9.4205e-17
Beta	ENSG00000140262	TCF12	1.19741	5.72378	71.8764	2.2911e-17	9.85234e-17
Beta	ENSG00000080298	RFX3	-0.664124	4.82229	71.8339	2.34091e-17	1.00588e-16
Beta	ENSG00000243660	ZNF487	-0.654606	3.28438	71.2317	3.17636e-17	1.35689e-16
Beta	ENSG00000161642	ZNF385A	2.77523	0.501734	70.2711	5.16906e-17	2.18648e-16
Beta	ENSG00000112182	BACH2	1.39233	2.07222	69.9375	6.12129e-17	2.57566e-16
Beta	ENSG00000100146	SOX10	3.55877	0.754638	69.8201	6.49685e-17	2.73163e-16
Beta	ENSG00000137309	HMGA1	0.680719	5.82408	69.7975	6.57153e-17	2.76165e-16
Beta	ENSG00000165891	E2F7	3.52558	0.323542	69.784	6.61671e-17	2.77925e-16
Beta	ENSG00000105856	HBP1	0.773765	5.37765	69.6248	7.17283e-17	3.01058e-16
Beta	ENSG00000177888	ZBTB41	-0.531018	4.51312	69.2164	8.82322e-17	3.69315e-16
Beta	ENSG00000129911	KLF16	-0.804967	3.21368	68.9556	1.00708e-16	4.20487e-16
Beta	ENSG00000187079	TEAD1	0.574882	4.98735	68.7389	1.12399e-16	4.68296e-16
Beta	ENSG00000005513	SOX8	1.81615	1.17439	68.5715	1.22362e-16	5.08753e-16
Beta	ENSG00000112246	SIM1	-0.623394	5.5476	68.1507	1.51462e-16	6.26338e-16
Beta	ENSG00000173451	THAP2	-0.593881	4.05352	67.6357	1.96676e-16	8.09724e-16
Beta	ENSG00000171604	CXXC5	0.506705	6.35703	67.2749	2.36168e-16	9.68284e-16
Beta	ENSG00000111145	ELK3	1.30112	1.71196	66.8437	2.93913e-16	1.20152e-15
Beta	ENSG00000101544	ADNP2	0.963375	3.7638	66.7174	3.13357e-16	1.27914e-15
Beta	ENSG00000215397	SCRT2	-3.71752	-1.37645	65.9902	4.53178e-16	1.84096e-15
Beta	ENSG00000139352	ASCL1	-2.19635	0.25807	65.2907	6.46271e-16	2.60273e-15
Beta	ENSG00000125740	FOSB	1.29793	8.0857	65.1363	6.98924e-16	2.80873e-15
Beta	ENSG00000142409	ZNF787	0.61697	4.28528	65.0991	7.1223e-16	2.86083e-15
Beta	ENSG00000185122	HSF1	0.691924	4.35182	64.4998	9.65409e-16	3.85751e-15
Beta	ENSG00000171827	ZNF570	-0.640248	3.38348	64.1121	1.17537e-15	4.66982e-15
Beta	ENSG00000117595	IRF6	0.644667	3.5109	63.1234	1.94152e-15	7.64871e-15
Beta	ENSG00000006468	ETV1	-0.985893	4.01328	63.0859	1.97883e-15	7.79386e-15
Beta	ENSG00000197951	ZNF71	-0.597435	3.21375	62.1979	3.10615e-15	1.21345e-14
Beta	ENSG00000160094	ZNF362	0.638447	3.35358	61.823	3.75756e-15	1.46249e-14
Beta	ENSG00000184828	ZBTB7C	1.86955	1.4505	61.7898	3.82156e-15	1.48668e-14
Beta	ENSG00000213988	ZNF90	1.096	2.46691	61.4337	4.57908e-15	1.77607e-14
Beta	ENSG00000175395	ZNF25	-0.969386	2.60829	61.324	4.84131e-15	1.87432e-14
Beta	ENSG00000019549	SNAI2	2.52607	1.19988	61.2154	5.11609e-15	1.97842e-14
Beta	ENSG00000169136	ATF5	0.74413	3.84899	61.065	5.52204e-15	2.13002e-14
Beta	ENSG00000172888	ZNF621	-0.543568	3.64028	60.9754	5.77928e-15	2.2272e-14
Beta	ENSG00000123636	BAZ2B	-0.437276	7.07318	60.8953	6.01925e-15	2.31756e-14
Beta	ENSG00000105698	USF2	-0.558149	5.41283	60.4914	7.38988e-15	2.83102e-14
Beta	ENSG00000256223	ZNF10	-0.521362	3.65785	60.1511	8.78457e-15	3.35614e-14
Beta	ENSG00000177606	JUN	1.41284	10.5938	60.0586	9.20732e-15	3.51446e-14
Beta	ENSG00000197134	ZNF257	1.08257	1.58361	60.0166	9.40596e-15	3.58783e-14
Beta	ENSG00000183309	ZNF623	-0.636081	2.99136	59.6929	1.10873e-14	4.21674e-14
Beta	ENSG00000136866	ZFP37	-0.753026	2.74268	59.3388	1.32733e-14	5.02312e-14
Beta	ENSG00000267041	ZNF850	1.49879	1.87104	59.1228	1.48134e-14	5.58334e-14
Beta	ENSG00000141510	TP53	0.642789	3.50186	59.0556	1.53281e-14	5.77473e-14
Beta	ENSG00000175727	MLXIP	0.511955	4.93727	58.5828	1.94917e-14	7.31222e-14
Beta	ENSG00000123933	MXD4	-0.417808	5.65681	58.4418	2.09394e-14	7.83607e-14
Beta	ENSG00000126003	PLAGL2	-0.533215	4.08499	58.2683	2.28702e-14	8.55294e-14
Beta	ENSG00000102974	CTCF	0.423258	5.38366	57.473	3.42646e-14	1.26956e-13
Beta	ENSG00000278129	ZNF8	-0.628005	2.86054	56.5317	5.52995e-14	2.03147e-13
Beta	ENSG00000125347	IRF1	1.36989	5.72189	56.404	5.901e-14	2.16542e-13
Beta	ENSG00000198453	ZNF568	-0.511991	4.49712	55.9548	7.41563e-14	2.70587e-13
Beta	ENSG00000189180	ZNF33A	-0.403155	5.83155	55.0618	1.16799e-13	4.21609e-13
Beta	ENSG00000151702	FLI1	-1.73067	0.125786	55.0084	1.20019e-13	4.32954e-13
Beta	ENSG00000154655	L3MBTL4	1.57321	0.9687	54.4294	1.61134e-13	5.77598e-13
Beta	ENSG00000197935	ZNF311	3.35302	-0.296131	54.4292	1.61146e-13	5.77598e-13
Beta	ENSG00000136826	KLF4	-1.24478	3.25715	54.4229	1.61666e-13	5.79338e-13
Beta	ENSG00000189190	ZNF600	1.15052	1.54991	54.3343	1.69122e-13	6.05153e-13
Beta	ENSG00000170561	IRX2	2.23813	4.6939	54.011	1.99373e-13	7.11128e-13
Beta	ENSG00000081665	ZNF506	-0.473621	4.78213	53.9632	2.04279e-13	7.277e-13
Beta	ENSG00000196437	ZNF569	-0.75941	2.90616	53.9534	2.053e-13	7.30872e-13
Beta	ENSG00000106261	ZKSCAN1	-0.41039	7.86585	53.4077	2.71026e-13	9.59375e-13
Beta	ENSG00000116990	MYCL	0.995438	2.30045	53.3399	2.80556e-13	9.92065e-13
Beta	ENSG00000135899	SP110	2.28163	0.911376	52.0065	5.53171e-13	1.92727e-12
Beta	ENSG00000110851	PRDM4	-0.586589	3.44689	51.7931	6.16669e-13	2.1414e-12
Beta	ENSG00000139793	MBNL2	0.381088	4.93535	51.7398	6.33638e-13	2.19851e-12
Beta	ENSG00000172819	RARG	2.49609	1.09216	51.6167	6.74645e-13	2.3379e-12
Beta	ENSG00000236104	ZBTB22	0.701896	2.88562	51.5384	7.02102e-13	2.42854e-12
Beta	ENSG00000214029	ZNF891	-0.667647	4.06046	51.2748	8.02985e-13	2.76781e-12
Beta	ENSG00000139515	PDX1	-0.54436	6.42438	51.2321	8.20677e-13	2.82706e-12
Beta	ENSG00000181472	ZBTB2	0.753791	2.75981	50.6423	1.10833e-12	3.79076e-12
Beta	ENSG00000170100	ZNF778	-0.621184	2.52476	50.0806	1.47555e-12	5.01901e-12
Beta	ENSG00000189144	ZNF573	-0.540359	2.85299	50.0803	1.47579e-12	5.01901e-12
Beta	ENSG00000127124	HIVEP3	-0.710618	2.48795	50.0544	1.49546e-12	5.08075e-12
Beta	ENSG00000175197	DDIT3	0.626537	5.55505	49.9859	1.54858e-12	5.25851e-12
Beta	ENSG00000170802	FOXN2	-0.620026	3.29191	49.4121	2.07465e-12	6.98922e-12
Beta	ENSG00000144655	CSRNP1	0.891441	4.42739	49.2837	2.215e-12	7.45606e-12
Beta	ENSG00000103495	MAZ	-0.418213	5.41392	48.8579	2.75199e-12	9.18825e-12
Beta	ENSG00000196867	ZFP28	-0.727828	2.48558	48.6356	3.08223e-12	1.02664e-11
Beta	ENSG00000185252	ZNF74	-0.561194	2.89044	48.412	3.45456e-12	1.14861e-11
Beta	ENSG00000165156	ZHX1	-0.343092	5.33163	47.8404	4.62354e-12	1.53002e-11
Beta	ENSG00000147117	ZNF157	-2.08197	-1.03978	46.2842	1.02287e-11	3.32596e-11
Beta	ENSG00000041988	THAP3	-0.4208	4.18502	46.1267	1.10847e-11	3.59804e-11
Beta	ENSG00000205903	ZNF316	-0.640973	3.54337	46.1158	1.11468e-11	3.61749e-11
Beta	ENSG00000123411	IKZF4	-0.925739	3.05911	46.0498	1.15288e-11	3.74073e-11
Beta	ENSG00000174576	NPAS4	-1.81887	3.28768	45.998	1.18372e-11	3.83859e-11
Beta	ENSG00000081386	ZNF510	-0.499644	3.29937	45.8618	1.26897e-11	4.10552e-11
Beta	ENSG00000112200	ZNF451	-0.383035	5.2864	45.6856	1.38839e-11	4.48672e-11
Beta	ENSG00000146592	CREB5	1.32194	1.70966	45.5496	1.48825e-11	4.80203e-11
Beta	ENSG00000196458	ZNF605	-0.472632	4.49546	45.3646	1.63565e-11	5.26654e-11
Beta	ENSG00000116809	ZBTB17	-0.588394	3.4824	45.0659	1.90513e-11	6.10732e-11
Beta	ENSG00000134046	MBD2	0.571437	4.56059	45.0224	1.94793e-11	6.23618e-11
Beta	ENSG00000196597	ZNF782	0.799066	2.09231	44.5907	2.42845e-11	7.7187e-11
Beta	ENSG00000186448	ZNF197	-0.389025	3.85924	44.1432	3.05216e-11	9.63917e-11
Beta	ENSG00000166454	ATMIN	-0.39176	4.48619	43.8651	3.51802e-11	1.10792e-10
Beta	ENSG00000036549	ZZZ3	-0.356438	5.19297	43.6411	3.94474e-11	1.23744e-10
Beta	ENSG00000165259	HDX	-0.524398	3.2634	43.6094	4.00905e-11	1.25668e-10
Beta	ENSG00000131116	ZNF428	-0.381984	6.89475	43.5256	4.18453e-11	1.31022e-10
Beta	ENSG00000196378	ZNF34	-0.604369	3.15802	43.3569	4.56124e-11	1.42366e-10
Beta	ENSG00000121297	TSHZ3	-1.19758	2.0763	43.2072	4.92379e-11	1.53312e-10
Beta	ENSG00000077092	RARB	2.10593	0.483129	43.0509	5.33341e-11	1.65637e-10
Beta	ENSG00000166823	MESP1	1.10239	1.9573	42.7799	6.1257e-11	1.89752e-10
Beta	ENSG00000126368	NR1D1	1.12659	2.66462	42.6624	6.50514e-11	2.01283e-10
Beta	ENSG00000125952	MAX	-0.392214	4.72282	42.2587	7.99645e-11	2.46295e-10
Beta	ENSG00000105127	AKAP8	0.475426	4.02593	42.1333	8.52599e-11	2.62221e-10
Beta	ENSG00000176371	ZSCAN2	-0.620567	3.14567	41.9255	9.48182e-11	2.90661e-10
Beta	ENSG00000075407	ZNF37A	-0.439206	5.44076	41.6968	1.06582e-10	3.25665e-10
Beta	ENSG00000007968	E2F2	3.13902	-0.274213	41.6419	1.09621e-10	3.34697e-10
Beta	ENSG00000170631	ZNF16	0.602783	2.90924	41.4272	1.22343e-10	3.72795e-10
Beta	ENSG00000185697	MYBL1	2.34726	0.161025	40.9143	1.59055e-10	4.81172e-10
Beta	ENSG00000165821	SALL2	-0.532883	3.29986	40.79	1.69496e-10	5.11011e-10
Beta	ENSG00000129071	MBD4	-0.320554	4.98521	40.2853	2.19449e-10	6.57252e-10
Beta	ENSG00000001167	NFYA	0.622032	3.03076	40.0144	2.52092e-10	7.52206e-10
Beta	ENSG00000177732	SOX12	-0.514542	4.16453	39.9865	2.5572e-10	7.62625e-10
Beta	ENSG00000170515	PA2G4	0.333487	6.80304	39.7865	2.83299e-10	8.4248e-10
Beta	ENSG00000153896	ZNF599	-0.420656	3.23848	39.7781	2.8452e-10	8.45665e-10
Beta	ENSG00000197372	ZNF675	-0.444883	3.9995	39.7265	2.92127e-10	8.67508e-10
Beta	ENSG00000107249	GLIS3	-0.770518	5.5714	39.6152	3.09265e-10	9.17103e-10
Beta	ENSG00000117505	DR1	-0.346684	4.5246	39.5721	3.16165e-10	9.37235e-10
Beta	ENSG00000182141	ZNF708	-0.428871	4.60309	39.5362	3.2203e-10	9.54117e-10
Beta	ENSG00000214189	ZNF788	1.61464	0.469671	39.4746	3.3236e-10	9.84233e-10
Beta	ENSG00000180479	ZNF571	-0.556699	2.81117	39.3515	3.53985e-10	1.04713e-09
Beta	ENSG00000099364	FBXL19	-0.598997	2.71923	39.1465	3.93168e-10	1.16059e-09
Beta	ENSG00000130254	SAFB2	0.403506	5.86008	39.0508	4.12917e-10	1.21696e-09
Beta	ENSG00000197063	MAFG	-0.564995	4.79499	38.6423	5.09033e-10	1.49083e-09
Beta	ENSG00000147118	ZNF182	-0.556827	2.72985	38.5997	5.2028e-10	1.52271e-09
Beta	ENSG00000213096	ZNF254	-0.436617	4.86814	38.5983	5.2064e-10	1.5235e-09
Beta	ENSG00000214575	CPEB1	-1.49758	0.042293	38.555	5.32315e-10	1.55712e-09
Beta	ENSG00000205683	DPF3	-1.0969	0.967858	38.0344	6.95092e-10	2.02062e-09
Beta	ENSG00000254004	ZNF260	-0.401424	4.23842	37.6508	8.46136e-10	2.44912e-09
Beta	ENSG00000112365	ZBTB24	-0.467536	3.55204	37.5737	8.80237e-10	2.54301e-09
Beta	ENSG00000198393	ZNF26	-0.532959	3.44128	37.1539	1.09165e-09	3.13493e-09
Beta	ENSG00000108509	CAMTA2	-0.441262	3.11197	36.8304	1.28863e-09	3.68926e-09
Beta	ENSG00000151623	NR3C2	1.21199	1.87445	36.8189	1.2963e-09	3.70997e-09
Beta	ENSG00000108788	MLX	-0.34589	4.41052	36.7691	1.32983e-09	3.80399e-09
Beta	ENSG00000125812	GZF1	-0.510266	3.55612	36.5395	1.49602e-09	4.2598e-09
Beta	ENSG00000158691	ZSCAN12	-0.586478	2.74084	36.0564	1.91685e-09	5.42197e-09
Beta	ENSG00000197360	ZNF98	1.06196	2.21504	36.0384	1.93468e-09	5.46994e-09
Beta	ENSG00000198824	CHAMP1	0.543233	3.40657	35.9984	1.9748e-09	5.57961e-09
Beta	ENSG00000118689	FOXO3	0.6398	5.22018	35.9474	2.02714e-09	5.72076e-09
Beta	ENSG00000067082	KLF6	0.940437	7.51139	35.36	2.74056e-09	7.66463e-09
Beta	ENSG00000117010	ZNF684	0.71985	2.25487	35.3407	2.76788e-09	7.73719e-09
Beta	ENSG00000198440	ZNF583	-0.463226	3.29755	35.226	2.93573e-09	8.19003e-09
Beta	ENSG00000186416	NKRF	-0.594994	2.93744	34.8939	3.48163e-09	9.67766e-09
Beta	ENSG00000133250	ZNF414	-0.497234	3.4935	34.7804	3.69066e-09	1.02434e-08
Beta	ENSG00000100207	TCF20	-0.405969	3.66701	34.774	3.70279e-09	1.0272e-08
Beta	ENSG00000120693	SMAD9	-0.811527	2.41483	34.6685	3.90898e-09	1.08251e-08
Beta	ENSG00000152443	ZNF776	-0.467901	3.14684	34.4754	4.31681e-09	1.19164e-08
Beta	ENSG00000124151	NCOA3	0.403945	4.42064	34.1291	5.15737e-09	1.41531e-08
Beta	ENSG00000178229	ZNF543	-0.537339	2.66426	33.9202	5.74202e-09	1.57165e-08
Beta	ENSG00000164107	HAND2	1.74928	1.32372	33.8335	6.00366e-09	1.64086e-08
Beta	ENSG00000185947	ZNF267	0.626294	3.11304	33.8064	6.08767e-09	1.66272e-08
Beta	ENSG00000049768	FOXP3	-1.24862	-0.153428	33.7885	6.14424e-09	1.6771e-08
Beta	ENSG00000196456	ZNF775	-0.585615	3.60316	33.749	6.27012e-09	1.71034e-08
Beta	ENSG00000197008	ZNF138	-0.410613	3.84091	33.6159	6.71407e-09	1.82907e-08
[truncated: 3,065 more rows]

## Sheet: Sheet3
Sheet3: Differentially expressed genes of each cell cluster in the pig integrated scRNA-seq datasets
Cluster.Name	EID_human	EID_pig	gene_symbol_human	gene_symbol_pig	logFC	logCPM	LR	PValue	padj
Acinar	ENSG00000074527	ENSSSCG00000000896	NTN4	NTN4	5.05991	4.28216	1177.13	5.70633e-258	1.25551e-253
Acinar	ENSG00000111452	ENSSSCG00000009745	ADGRD1	ADGRD1	5.24601	5.53448	1120.62	1.09013e-245	1.19925e-241
Acinar	ENSG00000170775	ENSSSCG00000016599	GPR37	GPR37	5.18919	4.36003	1062.08	5.76502e-233	4.22807e-229
Acinar	ENSG00000047936	ENSSSCG00000026978	ROS1	ROS1	5.24118	5.08183	985.528	2.51132e-216	1.38135e-212
Acinar	ENSG00000196277	ENSSSCG00000023891	GRM7	GRM7	5.77942	3.97105	972.949	1.36205e-213	5.99358e-210
Acinar	ENSG00000112280	ENSSSCG00000004274	COL9A1	COL9A1	5.06518	4.01053	920.574	3.30687e-202	1.21263e-198
Acinar	ENSG00000107249	ENSSSCG00000005224	GLIS3	GLIS3	5.44002	5.87464	901.317	5.07688e-198	1.59574e-194
Acinar	ENSG00000107562	ENSSSCG00000034973	CXCL12	CXCL12	4.86029	6.31017	898.436	2.14739e-197	5.90586e-194
Acinar	ENSG00000122870	ENSSSCG00000010204	BICC1	BICC1	4.74486	4.89126	844.84	9.62401e-186	2.11748e-182
Acinar	ENSG00000163623	ENSSSCG00000009232	NKX6-1	NKX6-1	4.9606	4.7099	821.953	9.10281e-181	1.82073e-177
Acinar	ENSG00000110092	ENSSSCG00000037900	CCND1	CCND1	4.66981	3.87476	818.314	5.62809e-180	1.03191e-176
Acinar	ENSG00000197766	ENSSSCG00000013418	CFD	CFD	4.96628	7.39981	814.197	4.42048e-179	7.48149e-176
Acinar	ENSG00000064042	ENSSSCG00000008799	LIMCH1	LIMCH1	4.80586	5.72977	811.411	1.78261e-178	2.80151e-175
Acinar	ENSG00000145826	ENSSSCG00000014315	LECT2	LECT2	4.96647	3.52153	804.391	5.98936e-177	8.78519e-174
Acinar	ENSG00000142871	ENSSSCG00000006940	CCN1	CCN1	4.11821	6.10772	798.651	1.05989e-175	1.45748e-172
Acinar	ENSG00000129595	ENSSSCG00000029860	EPB41L4A	EPB41L4A	3.94829	3.79005	788.285	1.9021e-173	2.46177e-170
Acinar	ENSG00000227051	ENSSSCG00000033807	C14orf132	ENSSSCG00000033807	4.33733	4.54908	784.087	1.55575e-172	1.90164e-169
Acinar	ENSG00000262655	ENSSSCG00000013393	SPON1	SPON1	5.05672	5.27494	783.925	1.68693e-172	1.95346e-169
Acinar	ENSG00000146038	ENSSSCG00000001085	DCDC2	DCDC2	4.66776	6.68565	758.801	4.89445e-167	5.38438e-164
Acinar	ENSG00000137285	ENSSSCG00000033655	TUBB2B	TUBB2B	3.63781	6.75492	748.276	9.51059e-165	9.51146e-162
Acinar	ENSG00000115457	ENSSSCG00000035392	IGFBP2	IGFBP2	3.18244	6.83883	745.902	3.12252e-164	2.98703e-161
Acinar	ENSG00000080293	ENSSSCG00000029536	SCTR	SCTR	4.29193	4.85983	734.495	9.43413e-162	8.64874e-159
Acinar	ENSG00000135480	ENSSSCG00000038966	KRT7	KRT7	4.25892	6.10735	720.766	9.12426e-159	7.72123e-156
Acinar	ENSG00000109819	ENSSSCG00000029275	PPARGC1A	PPARGC1A	4.9625	4.63371	714.991	1.64347e-157	1.33924e-154
Acinar	ENSG00000139318	ENSSSCG00000037910	DUSP6	DUSP6	4.34803	3.6589	712.868	4.75811e-157	3.73886e-154
Acinar	ENSG00000124701	ENSSSCG00000042447	APOBEC2	APOBEC2	4.01044	6.57773	712.018	7.28311e-157	5.52562e-154
Acinar	ENSG00000215547	ENSSSCG00000007216	DEFB115	DEFB115	4.99823	7.42008	700.155	2.76631e-154	2.02881e-151
Acinar	ENSG00000133401	ENSSSCG00000016810	PDZD2	ENSSSCG00000016810	-3.49751	5.08658	696.564	1.67041e-153	1.18556e-150
Acinar	ENSG00000184226	ENSSSCG00000038842	PCDH9	PCDH9	4.43587	5.38895	695.897	2.33335e-153	1.60433e-150
Acinar	ENSG00000067057	ENSSSCG00000011158	PFKP	PFKP	4.02563	4.8823	691.333	2.29296e-152	1.52878e-149
Acinar	ENSG00000189367	ENSSSCG00000004215	KIAA0408	KIAA0408	4.78405	4.94235	687.906	1.27548e-151	8.25383e-149
Acinar	ENSG00000110492	ENSSSCG00000013260	MDK	MDK	3.68113	8.63826	684.608	6.65133e-151	4.18122e-148
Acinar	ENSG00000120278	ENSSSCG00000032778	PLEKHG1	PLEKHG1	5.04374	3.43735	676.77	3.36758e-149	2.05815e-146
Acinar	ENSG00000105971	ENSSSCG00000016635	CAV2	CAV2	4.67405	3.31728	673.405	1.81605e-148	1.07991e-145
Acinar	ENSG00000181790	ENSSSCG00000035891	ADGRB1	ADGRB1	-4.123	4.90915	671.255	5.33024e-148	3.08621e-145
Acinar	ENSG00000144406	ENSSSCG00000016153	UNC80	UNC80	5.18814	5.07428	670.023	9.87498e-148	5.43173e-145
Acinar	ENSG00000118523	ENSSSCG00000004192	CCN2	CCN2	4.16791	5.92446	668.558	2.0568e-147	1.10375e-144
Acinar	ENSG00000106236	ENSSSCG00000007603	NPTX2	NPTX2	4.3734	4.58428	665.172	1.12113e-146	5.87312e-144
Acinar	ENSG00000178343	ENSSSCG00000040147	SHISA3	SHISA3	4.80869	4.15833	659.044	2.41094e-145	1.23362e-142
Acinar	ENSG00000112320	ENSSSCG00000004379	SOBP	SOBP	5.45262	3.83469	652.403	6.70503e-144	3.35282e-141
Acinar	ENSG00000158966	ENSSSCG00000004829	CACHD1	CACHD1	5.08804	5.00836	651.655	9.75298e-144	4.76856e-141
Acinar	ENSG00000258947	ENSSSCG00000002639	TUBB3	ENSSSCG00000002639	4.52375	3.39862	641.773	1.37496e-141	6.43655e-139
Acinar	ENSG00000153956	ENSSSCG00000015402	CACNA2D1	CACNA2D1	4.40506	6.09508	634.567	5.07726e-140	2.32729e-137
Acinar	ENSG00000018236	ENSSSCG00000000789	CNTN1	CNTN1	4.96872	5.16408	634.252	5.94278e-140	2.66843e-137
Acinar	ENSG00000175538	ENSSSCG00000029323	KCNE3	KCNE3	4.05606	4.82269	633.039	1.09135e-139	4.80238e-137
Acinar	ENSG00000116183	ENSSSCG00000015512	PAPPA2	PAPPA2	5.09672	4.85977	630.149	4.63836e-139	2.00104e-136
Acinar	ENSG00000156475	ENSSSCG00000028976	PPP2R2B	PPP2R2B	4.58976	3.07533	628.326	1.15592e-138	4.8909e-136
Acinar	ENSG00000092758	ENSSSCG00000040554	COL9A3	COL9A3	4.2027	4.46048	624.001	1.00823e-137	4.10798e-135
Acinar	ENSG00000089199	ENSSSCG00000039779	CHGB	CHGB	5.26864	8.04265	622.155	2.54177e-137	1.0168e-134
Acinar	ENSG00000168913	ENSSSCG00000027428	ENHO	ENHO	3.58187	4.43985	618.862	1.32225e-136	5.19501e-134
Acinar	ENSG00000006071	ENSSSCG00000013378	ABCC8	ABCC8	4.86642	5.5013	606.837	5.45333e-134	2.10498e-131
Acinar	ENSG00000104112	ENSSSCG00000004630	SCG3	SCG3	5.01177	5.24747	605.631	9.9773e-134	3.78484e-131
Acinar	ENSG00000109906	ENSSSCG00000030095	ZBTB16	ZBTB16	-3.48057	5.79588	592.479	7.23807e-131	2.69919e-128
Acinar	ENSG00000166035	ENSSSCG00000004596	LIPC	LIPC	-6.39562	4.38083	590.378	2.07365e-130	7.60408e-128
Acinar	ENSG00000120057	ENSSSCG00000010529	SFRP5	SFRP5	4.4057	4.21494	590.036	2.46036e-130	8.87423e-128
Acinar	ENSG00000165556	ENSSSCG00000009317	CDX2	CDX2	4.37978	3.0464	588.312	5.8364e-130	2.07117e-127
Acinar	ENSG00000105894	ENSSSCG00000016522	PTN	PTN	5.11399	7.32037	587.043	1.10194e-129	3.84838e-127
Acinar	ENSG00000129951	ENSSSCG00000037432	PLPPR3	PLPPR3	3.77887	4.29154	585.271	2.67638e-129	9.2009e-127
Acinar	ENSG00000175426	ENSSSCG00000014169	PCSK1	PCSK1	4.98422	5.15653	577.979	1.03224e-127	3.49405e-125
Acinar	ENSG00000235162	ENSSSCG00000031661	C12orf75	ENSSSCG00000031661	4.18099	7.64995	576.898	1.7733e-127	5.91154e-125
Acinar	ENSG00000185985	ENSSSCG00000012724	SLITRK2	SLITRK2	4.62965	5.27752	572.79	1.38843e-126	4.55945e-124
Acinar	ENSG00000214402	ENSSSCG00000032480	LCNL1	ENSSSCG00000032480	2.80064	4.88728	571.559	2.57204e-126	8.32207e-124
Acinar	ENSG00000118690	ENSSSCG00000004388	ARMC2	ARMC2	3.59	3.61743	569.468	7.32773e-126	2.33659e-123
Acinar	ENSG00000044524	ENSSSCG00000026130	EPHA3	EPHA3	4.45618	3.27008	569.372	7.69129e-126	2.41748e-123
Acinar	ENSG00000183690	ENSSSCG00000021846	EFHC2	EFHC2	4.4232	3.75949	567.896	1.61065e-125	4.92189e-123
Acinar	ENSG00000077238	ENSSSCG00000007817	IL4R	IL4R	-2.69105	4.81667	565.282	5.96456e-125	1.7977e-122
Acinar	ENSG00000169903	ENSSSCG00000011703	TM4SF4	TM4SF4	4.45566	6.75661	558.699	1.61278e-123	4.79519e-121
Acinar	ENSG00000092421	ENSSSCG00000014224	SEMA6A	SEMA6A	4.31192	3.50528	557.71	2.64763e-123	7.76707e-121
Acinar	ENSG00000060709	ENSSSCG00000009748	RIMBP2	RIMBP2	4.79879	4.10434	555.089	9.83727e-123	2.84789e-120
Acinar	ENSG00000115194	ENSSSCG00000021534	SLC30A3	SLC30A3	4.11131	3.24066	550.067	1.21712e-121	3.4778e-119
Acinar	ENSG00000170382	ENSSSCG00000015285	LRRN2	LRRN2	5.25668	2.72936	549.92	1.31063e-121	3.69699e-119
Acinar	ENSG00000135929	ENSSSCG00000016199	CYP27A1	CYP27A1	4.37116	3.51305	547.6	4.18867e-121	1.16657e-118
Acinar	ENSG00000155974	ENSSSCG00000000478	GRIP1	GRIP1	2.6774	4.01155	546.077	8.98287e-121	2.47051e-118
Acinar	ENSG00000005249	ENSSSCG00000037706	PRKAR2B	PRKAR2B	4.42619	2.92337	541.012	1.13549e-119	3.08433e-117
Acinar	ENSG00000124882	ENSSSCG00000038185	EREG	EREG	4.56274	3.03353	539.009	3.09793e-119	8.31227e-117
Acinar	ENSG00000078053	ENSSSCG00000024136	AMPH	AMPH	4.62153	2.56799	538.914	3.24825e-119	8.61061e-117
Acinar	ENSG00000103569	ENSSSCG00000004597	AQP9	AQP9	4.48553	2.96672	536.474	1.10289e-118	2.88879e-116
Acinar	ENSG00000122859	ENSSSCG00000034488	NEUROG3	NEUROG3	4.9085	6.6053	534.441	3.05371e-118	7.90444e-116
Acinar	ENSG00000148143	ENSSSCG00000031592	ZNF462	ZNF462	4.88569	3.38228	534.29	3.29281e-118	8.42424e-116
Acinar	ENSG00000184408	ENSSSCG00000016621	KCND2	KCND2	4.98675	3.47778	533.982	3.84319e-118	9.71929e-116
Acinar	ENSG00000203727	ENSSSCG00000048240	SAMD5	SAMD5	4.50287	3.457	530.619	2.07172e-117	5.17976e-115
Acinar	ENSG00000138829	ENSSSCG00000014256	FBN2	FBN2	5.54134	4.57594	530.211	2.54117e-117	6.28211e-115
Acinar	ENSG00000131711	ENSSSCG00000016974	MAP1B	MAP1B	5.10436	5.43962	530.159	2.60834e-117	6.37653e-115
Acinar	ENSG00000114757	ENSSSCG00000011766	PEX5L	PEX5L	4.81525	4.64385	527.419	1.02922e-116	2.48845e-114
Acinar	ENSG00000117020	ENSSSCG00000010872	AKT3	AKT3	3.89548	3.4248	525.529	2.65277e-116	6.34416e-114
Acinar	ENSG00000168589	ENSSSCG00000031421	DYNLRB2	DYNLRB2	3.07575	4.39133	524.728	3.96111e-116	9.37123e-114
Acinar	ENSG00000118137	ENSSSCG00000030921	APOA1	APOA1	4.18623	6.47746	522.936	9.7232e-116	2.25189e-113
Acinar	ENSG00000137801	ENSSSCG00000004789	THBS1	THBS1	4.31317	4.1929	522.014	1.54304e-115	3.53646e-113
Acinar	ENSG00000137821	ENSSSCG00000004976	LRRC49	LRRC49	4.88293	2.99162	518.549	8.75325e-115	1.98545e-112
Acinar	ENSG00000171914	ENSSSCG00000024088	TLN2	TLN2	-2.68184	4.7899	518.041	1.12922e-114	2.53522e-112
Acinar	ENSG00000099204	ENSSSCG00000010651	ABLIM1	ABLIM1	4.83836	7.34706	517.54	1.45127e-114	3.22533e-112
Acinar	ENSG00000122035	ENSSSCG00000039890	RASL11A	RASL11A	3.93244	4.1885	514.979	5.23402e-114	1.15159e-111
Acinar	ENSG00000166825	ENSSSCG00000001849	ANPEP	ANPEP	-2.99945	6.42157	510.676	4.52002e-113	9.84647e-111
Acinar	ENSG00000174473	ENSSSCG00000021805	GALNTL6	GALNTL6	4.8443	2.84371	507.623	2.0866e-112	4.50091e-110
Acinar	ENSG00000116729	ENSSSCG00000003795	WLS	WLS	2.51165	5.2462	496.298	6.0738e-110	1.29743e-107
Acinar	ENSG00000104537	ENSSSCG00000005979	ANXA13	ANXA13	4.81402	3.1969	494.604	1.41935e-109	3.00274e-107
Acinar	ENSG00000171724	ENSSSCG00000002696	VAT1L	VAT1L	4.48175	2.44692	492.178	4.78591e-109	1.00285e-106
Acinar	ENSG00000101680	ENSSSCG00000034767	LAMA1	LAMA1	4.45932	3.66932	489.999	1.42592e-108	2.95973e-106
Acinar	ENSG00000081052	ENSSSCG00000016244	COL4A4	COL4A4	4.81544	2.55164	489.781	1.58997e-108	3.26939e-106
Acinar	ENSG00000088992	ENSSSCG00000009859	TESC	TESC	4.37219	4.57265	488.403	3.17151e-108	6.46106e-106
Acinar	ENSG00000256870	ENSSSCG00000000871	SLC5A8	SLC5A8	4.37658	2.84851	487.639	4.65149e-108	9.38919e-106
Acinar	ENSG00000171224	ENSSSCG00000040498	FAM241B	ENSSSCG00000040498	2.56249	3.93444	487.069	6.18709e-108	1.23753e-105
Acinar	ENSG00000108960	ENSSSCG00000017605	MMD	MMD	3.91622	6.45062	484.695	2.03289e-107	4.02952e-105
Acinar	ENSG00000100604	ENSSSCG00000002456	CHGA	CHGA	4.83126	10.3567	483.941	2.96595e-107	5.82651e-105
Acinar	ENSG00000134532	ENSSSCG00000000567	SOX5	SOX5	2.78292	6.00651	483.614	3.49492e-107	6.80488e-105
Acinar	ENSG00000186472	ENSSSCG00000015401	PCLO	PCLO	4.67372	3.73191	482.705	5.51003e-107	1.06344e-104
Acinar	ENSG00000118308	ENSSSCG00000000563	IRAG2	ENSSSCG00000000563	-4.83003	3.90416	481.998	7.85204e-107	1.48931e-104
Acinar	ENSG00000118785	ENSSSCG00000009216	SPP1	SPP1	4.07609	6.79393	481.572	9.72269e-107	1.82836e-104
Acinar	ENSG00000142621	ENSSSCG00000003455	FHAD1	FHAD1	2.85547	3.33507	480.685	1.51564e-106	2.82602e-104
Acinar	ENSG00000165194	ENSSSCG00000012479	PCDH19	PCDH19	5.8223	2.36156	477.865	6.22676e-106	1.15127e-103
Acinar	ENSG00000162992	ENSSSCG00000016011	NEUROD1	NEUROD1	4.78168	5.63732	477.339	8.10549e-106	1.48614e-103
Acinar	ENSG00000186469	ENSSSCG00000028092	GNG2	ENSSSCG00000028092	4.56242	5.81168	474.33	3.66108e-105	6.60255e-103
Acinar	ENSG00000127743	ENSSSCG00000014434	IL17B	IL17B	-3.64824	3.50773	471.651	1.4011e-104	2.50626e-102
Acinar	ENSG00000128581	ENSSSCG00000046214	IFT22	IFT22	3.14107	4.79147	467.274	1.25599e-103	2.21835e-101
Acinar	ENSG00000082397	ENSSSCG00000003687	EPB41L3	EPB41L3	4.63409	3.78404	464.917	4.092e-103	7.14541e-101
Acinar	ENSG00000156284	ENSSSCG00000012030	CLDN8	CLDN8	3.76719	3.2164	464.142	6.03299e-103	1.04041e-100
Acinar	ENSG00000117009	ENSSSCG00000025686	KMO	KMO	4.27656	5.14539	464.135	6.05272e-103	1.04041e-100
Acinar	ENSG00000158163	ENSSSCG00000027467	DZIP1L	DZIP1L	5.78033	2.26524	462.847	1.15461e-102	1.95414e-100
Acinar	ENSG00000115380	ENSSSCG00000008397	EFEMP1	EFEMP1	-4.02184	3.96709	460.904	3.05666e-102	5.13378e-100
Acinar	ENSG00000167434	ENSSSCG00000023186	CA4	CA4	4.82297	2.95562	460.044	4.70226e-102	7.83781e-100
Acinar	ENSG00000164418	ENSSSCG00000004361	GRIK2	GRIK2	4.42508	3.27512	459.773	5.38612e-102	8.84967e-100
Acinar	ENSG00000129474	ENSSSCG00000029201	AJUBA	AJUBA	3.50757	2.77395	459.772	5.38976e-102	8.84967e-100
Acinar	ENSG00000172379	ENSSSCG00000040288	ARNT2	ARNT2	3.83012	2.43716	459.428	6.40296e-102	1.04354e-99
Acinar	ENSG00000129521	ENSSSCG00000001963	EGLN3	EGLN3	-3.77325	3.30662	459.361	6.6227e-102	1.07142e-99
Acinar	ENSG00000163644	ENSSSCG00000038867	PPM1K	PPM1K	-3.44669	6.01646	459.22	7.10677e-102	1.14134e-99
Acinar	ENSG00000159248	ENSSSCG00000036219	GJD2	GJD2	4.58652	4.18457	458.473	1.03348e-101	1.64773e-99
Acinar	ENSG00000196975	ENSSSCG00000008336	ANXA4	ANXA4	2.8658	6.71481	457.936	1.35207e-101	2.14017e-99
Acinar	ENSG00000131437	ENSSSCG00000014283	KIF3A	KIF3A	2.42143	4.41973	456.952	2.2136e-101	3.47882e-99
Acinar	ENSG00000181744	ENSSSCG00000036206	DIPK2A	DIPK2A	3.54687	4.87671	455.045	5.7571e-101	8.98353e-99
Acinar	ENSG00000090971	ENSSSCG00000034329	NAT14	NAT14	3.57997	3.96574	454.758	6.64813e-101	1.03009e-98
Acinar	ENSG00000171617	ENSSSCG00000014072	ENC1	ENC1	3.55014	4.77771	451.778	2.95878e-100	4.52077e-98
Acinar	ENSG00000171714	ENSSSCG00000013344	ANO5	ANO5	4.48338	2.01866	451.438	3.50961e-100	5.32541e-98
Acinar	ENSG00000138640	ENSSSCG00000026196	FAM13A	FAM13A	-2.13319	5.02967	444.258	1.28177e-98	1.89271e-96
Acinar	ENSG00000016082	ENSSSCG00000016883	ISL1	ISL1	5.54918	5.99384	444.118	1.37441e-98	2.01599e-96
Acinar	ENSG00000197872	ENSSSCG00000008617	CYRIA	CYRIA	4.94668	3.14191	443.138	2.24702e-98	3.2741e-96
Acinar	ENSG00000118515	ENSSSCG00000021443	SGK1	SGK1	4.51218	3.69192	442.396	3.25839e-98	4.68569e-96
Acinar	ENSG00000164794	ENSSSCG00000006021	KCNV1	KCNV1	4.55734	3.24698	440.987	6.60187e-98	9.4321e-96
Acinar	ENSG00000019505	ENSSSCG00000031590	SYT13	SYT13	4.552	4.55903	440.817	7.18684e-98	1.02016e-95
Acinar	ENSG00000094975	ENSSSCG00000015485	SUCO	SUCO	-2.84471	6.98296	440.023	1.07006e-97	1.5092e-95
Acinar	ENSG00000148948	ENSSSCG00000013286	LRRC4C	LRRC4C	4.70089	3.26666	439.42	1.44763e-97	2.02871e-95
Acinar	ENSG00000103489	ENSSSCG00000007872	XYLT1	XYLT1	2.97	4.02904	439.392	1.468e-97	2.04424e-95
Acinar	ENSG00000105696	ENSSSCG00000013911	TMEM59L	TMEM59L	4.09193	3.55174	438.061	2.86095e-97	3.95891e-95
Acinar	ENSG00000140859	ENSSSCG00000002812	KIFC3	KIFC3	4.03483	2.88827	437.275	4.24142e-97	5.83248e-95
Acinar	ENSG00000002587	ENSSSCG00000021515	HS3ST1	HS3ST1	4.66368	2.52715	434.47	1.72971e-96	2.36379e-94
Acinar	ENSG00000134775	ENSSSCG00000027935	FHOD3	FHOD3	4.76395	2.83141	433.831	2.38245e-96	3.23572e-94
Acinar	ENSG00000091513	ENSSSCG00000011640	TF	TF	4.75338	2.73362	433.266	3.16242e-96	4.26869e-94
Acinar	ENSG00000135423	ENSSSCG00000000401	GLS2	GLS2	-3.91587	4.54089	432.68	4.24147e-96	5.69029e-94
Acinar	ENSG00000084764	ENSSSCG00000029185	MAPRE3	MAPRE3	3.75912	4.94637	431.993	5.9842e-96	7.97966e-94
Acinar	ENSG00000077522	ENSSSCG00000010144	ACTN2	ACTN2	-3.16808	2.67671	430.596	1.20548e-95	1.5882e-93
Acinar	ENSG00000134871	ENSSSCG00000009545	COL4A2	COL4A2	4.23623	4.90851	428.431	3.56762e-95	4.6723e-93
Acinar	ENSG00000078114	ENSSSCG00000011090	NEBL	NEBL	4.69053	2.34591	428.202	4.001e-95	5.20887e-93
Acinar	ENSG00000100077	ENSSSCG00000009956	GRK3	GRK3	2.76722	5.45922	427.471	5.77303e-95	7.47165e-93
Acinar	ENSG00000204347	ENSSSCG00000026789	BTBD17	BTBD17	4.76482	4.16172	423.063	5.25588e-94	6.76257e-92
Acinar	ENSG00000196872	ENSSSCG00000008187	CRACDL	CRACDL	-3.94214	2.40588	422.053	8.71957e-94	1.1154e-91
Acinar	ENSG00000169435	ENSSSCG00000008952	RASSF6	RASSF6	-2.27634	4.54375	421.718	1.03184e-93	1.31229e-91
Acinar	ENSG00000159251	ENSSSCG00000004803	ACTC1	ACTC1	4.84584	5.07298	420.78	1.65054e-93	2.08708e-91
Acinar	ENSG00000171951	ENSSSCG00000023032	SCG2	SCG2	5.07275	7.31338	418.845	4.3535e-93	5.47347e-91
Acinar	ENSG00000125851	ENSSSCG00000007083	PCSK2	PCSK2	4.81054	6.57882	418.757	4.54876e-93	5.68646e-91
Acinar	ENSG00000176170	ENSSSCG00000017178	SPHK1	SPHK1	3.58027	3.98844	417.281	9.53387e-93	1.18511e-90
Acinar	ENSG00000092871	ENSSSCG00000032552	RFFL	ENSSSCG00000032552	-2.0724	5.86849	416.001	1.81051e-92	2.23792e-90
Acinar	ENSG00000007372	ENSSSCG00000013320	PAX6	PAX6	4.74718	6.78161	413.878	5.24744e-92	6.44995e-90
Acinar	ENSG00000131951	ENSSSCG00000005081	LRRC9	LRRC9	4.33902	3.27144	411.564	1.6737e-91	2.04582e-89
Acinar	ENSG00000145198	ENSSSCG00000026185	VWA5B2	VWA5B2	3.88372	4.1074	408.934	6.25365e-91	7.51874e-89
Acinar	ENSG00000144711	ENSSSCG00000027812	IQSEC1	IQSEC1	-2.78156	4.42525	408.455	7.94936e-91	9.50554e-89
Acinar	ENSG00000125675	ENSSSCG00000012638	GRIA3	GRIA3	4.0442	6.30347	406.381	2.24825e-90	2.67383e-88
Acinar	ENSG00000175315	ENSSSCG00000012960	CST6	CST6	3.32136	3.69873	406.309	2.33102e-90	2.75737e-88
Acinar	ENSG00000106070	ENSSSCG00000015631	GRB10	GRB10	-3.11686	5.49777	405.846	2.93958e-90	3.45864e-88
Acinar	ENSG00000126785	ENSSSCG00000022804	RHOJ	RHOJ	5.10977	2.37005	405.525	3.45411e-90	4.04241e-88
Acinar	ENSG00000109472	ENSSSCG00000008854	CPE	CPE	4.62315	7.38846	402.186	1.84107e-89	2.14324e-87
Acinar	ENSG00000206069	ENSSSCG00000009952	TMEM211	ENSSSCG00000009952	-4.16132	4.34376	401.112	3.15359e-89	3.65186e-87
Acinar	ENSG00000144834	ENSSSCG00000037190	TAGLN3	TAGLN3	4.93133	5.1007	399.909	5.76402e-89	6.63979e-87
Acinar	ENSG00000180745	ENSSSCG00000010753	CLRN3	CLRN3	3.79746	3.07581	399.732	6.29989e-89	7.21928e-87
Acinar	ENSG00000276644	ENSSSCG00000009457	DACH1	DACH1	3.95907	7.18412	396.463	3.24233e-88	3.69626e-86
Acinar	ENSG00000170959	ENSSSCG00000013326	DCDC1	ENSSSCG00000013326	3.22474	2.9709	395.94	4.21519e-88	4.78055e-86
Acinar	ENSG00000153253	ENSSSCG00000015911	SCN3A	SCN3A	5.01535	2.82066	394.273	9.72011e-88	1.09673e-85
Acinar	ENSG00000171102	ENSSSCG00000043049	OBP2B	ENSSSCG00000043049	-6.92386	1.58192	393.27	1.60676e-87	1.80367e-85
Acinar	ENSG00000122136	ENSSSCG00000043049	OBP2A	ENSSSCG00000043049	-6.92386	1.58192	393.27	1.60676e-87	1.80367e-85
Acinar	ENSG00000001626	ENSSSCG00000016626	CFTR	CFTR	3.59589	5.02392	392.911	1.92375e-87	2.14854e-85
Acinar	ENSG00000109062	ENSSSCG00000017232	SLC9A3R1	SLC9A3R1	2.33177	5.1988	392.436	2.4407e-87	2.71213e-85
Acinar	ENSG00000132970	ENSSSCG00000009300	WASF3	WASF3	3.02923	3.41288	391.258	4.40643e-87	4.87188e-85
Acinar	ENSG00000117598	ENSSSCG00000006876	PLPPR5	PLPPR5	4.40237	2.66226	390.475	6.52202e-87	7.17487e-85
Acinar	ENSG00000211445	ENSSSCG00000036438	GPX3	GPX3	4.87798	6.79599	390.087	7.92203e-87	8.67167e-85
Acinar	ENSG00000010810	ENSSSCG00000004421	FYN	FYN	3.69791	4.42504	388.91	1.42978e-86	1.55733e-84
Acinar	ENSG00000061918	ENSSSCG00000008870	GUCY1B1	GUCY1B1	3.1628	3.66796	386.523	4.72939e-86	5.12592e-84
Acinar	ENSG00000126010	ENSSSCG00000012144	GRPR	GRPR	-4.17302	3.94928	385.791	6.82706e-86	7.32727e-84
Acinar	ENSG00000102385	ENSSSCG00000012492	DRP2	DRP2	5.26554	2.14354	384.375	1.38857e-85	1.48308e-83
Acinar	ENSG00000182901	ENSSSCG00000010840	RGS7	RGS7	3.37411	4.21261	383.653	1.99358e-85	2.10878e-83
Acinar	ENSG00000179104	ENSSSCG00000024065	TMTC2	TMTC2	2.48531	4.3002	383.22	2.47728e-85	2.6079e-83
Acinar	ENSG00000237763	ENSSSCG00000033100	AMY1A	ENSSSCG00000033100	-7.52754	1.70788	382.45	3.64344e-85	3.81728e-83
Acinar	ENSG00000174876	ENSSSCG00000033100	AMY1B	ENSSSCG00000033100	-7.52754	1.70788	382.45	3.64344e-85	3.81728e-83
Acinar	ENSG00000187733	ENSSSCG00000033100	AMY1C	ENSSSCG00000033100	-7.52754	1.70788	382.45	3.64344e-85	3.81728e-83
Acinar	ENSG00000240038	ENSSSCG00000033100	AMY2B	ENSSSCG00000033100	-7.52754	1.70788	382.45	3.64344e-85	3.81728e-83
Acinar	ENSG00000243480	ENSSSCG00000033100	AMY2A	ENSSSCG00000033100	-7.52754	1.70788	382.45	3.64344e-85	3.81728e-83
Acinar	ENSG00000189184	ENSSSCG00000032749	PCDH18	PCDH18	-3.02066	2.35128	382.21	4.10898e-85	4.28463e-83
Acinar	ENSG00000152217	ENSSSCG00000004490	SETBP1	SETBP1	2.41796	5.38666	381.615	5.53927e-85	5.74882e-83
Acinar	ENSG00000142192	ENSSSCG00000012022	APP	APP	2.64476	7.31816	381.335	6.37125e-85	6.58123e-83
Acinar	ENSG00000197119	ENSSSCG00000002520	SLC25A29	SLC25A29	2.24058	3.25926	381.144	7.0121e-85	7.20936e-83
Acinar	ENSG00000199085	ENSSSCG00000018277	MIR148A	MIR148A	-4.40792	2.4585	380.902	7.91856e-85	8.10344e-83
Acinar	ENSG00000144369	ENSSSCG00000025134	FAM171B	FAM171B	4.47893	3.73093	380.161	1.14813e-84	1.16411e-82
Acinar	ENSG00000165105	ENSSSCG00000040707	RASEF	ENSSSCG00000040707	-4.53412	2.14224	378.703	2.38434e-84	2.40643e-82
Acinar	ENSG00000183098	ENSSSCG00000009489	GPC6	GPC6	4.11619	3.39282	377.908	3.55162e-84	3.56816e-82
Acinar	ENSG00000104093	ENSSSCG00000032517	DMXL2	DMXL2	3.57223	2.508	377.715	3.91155e-84	3.9119e-82
Acinar	ENSG00000136193	ENSSSCG00000016684	SCRN1	SCRN1	3.79688	5.49052	377.421	4.53473e-84	4.51462e-82
Acinar	ENSG00000205336	ENSSSCG00000002815	ADGRG1	ADGRG1	2.81325	3.76206	377.072	5.40174e-84	5.33741e-82
Acinar	ENSG00000093144	ENSSSCG00000004216	ECHDC1	ECHDC1	2.21732	5.42673	377.069	5.4097e-84	5.33741e-82
Acinar	ENSG00000137070	ENSSSCG00000010968	IL11RA	ENSSSCG00000010968	-2.30961	6.203	376.504	7.17822e-84	7.05068e-82
Acinar	ENSG00000198780	ENSSSCG00000014076	FAM169A	FAM169A	-1.90044	5.20008	376.367	7.68906e-84	7.51888e-82
Acinar	ENSG00000089101	ENSSSCG00000038858	CFAP61	CFAP61	4.68408	6.54294	375.842	1.00048e-83	9.74011e-82
Acinar	ENSG00000186283	ENSSSCG00000015525	TOR3A	TOR3A	3.54545	2.94851	375.676	1.08761e-83	1.05416e-81
Acinar	ENSG00000130294	ENSSSCG00000016401	KIF1A	KIF1A	3.87073	3.76735	375.055	1.48478e-83	1.43281e-81
Acinar	ENSG00000188175	ENSSSCG00000025870	HEPACAM2	HEPACAM2	4.32216	6.41862	373.942	2.5942e-83	2.49247e-81
Acinar	ENSG00000145920	ENSSSCG00000033682	CPLX2	CPLX2	4.79555	4.65087	373.63	3.03346e-83	2.90183e-81
Acinar	ENSG00000196632	ENSSSCG00000012332	WNK3	WNK3	3.00942	3.38508	372.864	4.45243e-83	4.22252e-81
Acinar	ENSG00000167964	ENSSSCG00000033691	RAB26	RAB26	4.60424	6.30314	372.453	5.47209e-83	5.16725e-81
Acinar	ENSG00000140873	ENSSSCG00000038627	ADAMTS18	ADAMTS18	3.98278	4.02423	372.286	5.95055e-83	5.59505e-81
Acinar	ENSG00000186868	ENSSSCG00000017311	MAPT	MAPT	3.88785	5.76091	371.878	7.29983e-83	6.8345e-81
Acinar	ENSG00000185176	ENSSSCG00000035083	AQP12B	ENSSSCG00000035083	-4.03119	4.02376	371.605	8.36829e-83	7.80166e-81
Acinar	ENSG00000184945	ENSSSCG00000035083	AQP12A	ENSSSCG00000035083	-4.03119	4.02376	371.605	8.36829e-83	7.80166e-81
Acinar	ENSG00000081803	ENSSSCG00000016611	CADPS2	CADPS2	-3.16717	4.86693	370.804	1.25057e-82	1.16097e-80
Acinar	ENSG00000081479	ENSSSCG00000040746	LRP2	LRP2	4.90543	2.45568	370.304	1.6073e-82	1.48587e-80
Acinar	ENSG00000096872	ENSSSCG00000005124	IFT74	IFT74	2.90009	3.84977	370.039	1.83513e-82	1.68939e-80
Acinar	ENSG00000176788	ENSSSCG00000039222	BASP1	ENSSSCG00000039222	4.37568	5.4073	369.94	1.92825e-82	1.76772e-80
Acinar	ENSG00000119973	ENSSSCG00000037789	PRLHR	PRLHR	5.27098	3.08859	369.244	2.73354e-82	2.49558e-80
Acinar	ENSG00000116260	ENSSSCG00000015535	QSOX1	QSOX1	3.31025	5.23541	368.626	3.72609e-82	3.38766e-80
Acinar	ENSG00000009950	ENSSSCG00000007710	MLXIPL	MLXIPL	3.63183	5.34282	368.024	5.03936e-82	4.5628e-80
Acinar	ENSG00000136574	ENSSSCG00000022383	GATA4	GATA4	-3.5977	5.04677	367.304	7.22957e-82	6.51905e-80
Acinar	ENSG00000139880	ENSSSCG00000002037	CDH24	CDH24	3.49945	2.33619	367.244	7.45067e-82	6.66827e-80
Acinar	ENSG00000080493	ENSSSCG00000008943	SLC4A4	SLC4A4	4.56117	8.9775	367.243	7.45566e-82	6.66827e-80
Acinar	ENSG00000163697	ENSSSCG00000022168	APBB2	APBB2	-1.78292	4.99507	366.728	9.65057e-82	8.56176e-80
Acinar	ENSG00000100490	ENSSSCG00000034516	CDKL1	CDKL1	-4.06513	6.7999	366.187	1.26589e-81	1.11856e-79
Acinar	ENSG00000123612	ENSSSCG00000015873	ACVR1C	ACVR1C	4.53288	3.31004	365.905	1.45812e-81	1.28326e-79
Acinar	ENSG00000152804	ENSSSCG00000036314	HHEX	HHEX	4.6549	4.43477	365.082	2.20349e-81	1.92386e-79
Acinar	ENSG00000196935	ENSSSCG00000029815	SRGAP1	SRGAP1	3.3841	2.92955	364.775	2.56997e-81	2.23496e-79
Acinar	ENSG00000105825	ENSSSCG00000015322	TFPI2	TFPI2	4.52012	3.6781	363.425	5.05504e-81	4.37878e-79
Acinar	ENSG00000137731	ENSSSCG00000015084	FXYD2	ENSSSCG00000015084	4.80869	8.62619	363	6.2556e-81	5.39748e-79
Acinar	ENSG00000255245	ENSSSCG00000015084	FXYD6-FXYD2	ENSSSCG00000015084	4.80869	8.62619	363	6.2556e-81	5.39748e-79
Acinar	ENSG00000147488	ENSSSCG00000006266	ST18	ST18	4.37541	2.69073	362.186	9.41121e-81	8.0885e-79
Acinar	ENSG00000164638	ENSSSCG00000027768	SLC29A4	SLC29A4	3.64102	3.75159	361.19	1.55081e-80	1.32252e-78
Acinar	ENSG00000160963	ENSSSCG00000007678	COL26A1	COL26A1	4.38506	3.57716	361.09	1.63002e-80	1.3847e-78
Acinar	ENSG00000133401	ENSSSCG00000042498	PDZD2	ENSSSCG00000042498	-3.73136	3.76358	360.818	1.86797e-80	1.58073e-78
Acinar	ENSG00000185905	ENSSSCG00000029752	C16orf54	ENSSSCG00000029752	4.52052	2.7241	360.284	2.44167e-80	2.0583e-78
Acinar	ENSG00000171533	ENSSSCG00000014860	MAP6	MAP6	3.60965	2.79835	359.176	4.25545e-80	3.5736e-78
Acinar	ENSG00000139946	ENSSSCG00000033800	PELI2	PELI2	-2.03161	6.66562	358.786	5.17434e-80	4.32874e-78
Acinar	ENSG00000073464	ENSSSCG00000024809	CLCN4	CLCN4	3.38303	2.68308	357.526	9.73198e-80	8.11072e-78
Acinar	ENSG00000147262	ENSSSCG00000012661	GPR119	GPR119	5.20416	2.85472	357.203	1.1447e-79	9.50404e-78
Acinar	ENSG00000090530	ENSSSCG00000011813	P3H2	P3H2	3.76972	2.71784	357.02	1.25468e-79	1.0378e-77
Acinar	ENSG00000078401	ENSSSCG00000035598	EDN1	EDN1	4.0304	2.18836	356.405	1.70771e-79	1.40723e-77
Acinar	ENSG00000044012	ENSSSCG00000003970	GUCA2B	GUCA2B	5.74157	5.00553	356.074	2.01591e-79	1.655e-77
Acinar	ENSG00000186732	ENSSSCG00000038685	MPPED1	MPPED1	-4.21661	3.05167	355.905	2.19472e-79	1.7951e-77
Acinar	ENSG00000213160	ENSSSCG00000015937	KLHL23	KLHL23	-2.05603	6.03399	355.745	2.37783e-79	1.93767e-77
Acinar	ENSG00000166922	ENSSSCG00000004807	SCG5	SCG5	4.26324	8.34739	354.703	4.00961e-79	3.25533e-77
Acinar	ENSG00000182580	ENSSSCG00000026516	EPHB3	EPHB3	4.1759	2.36085	354.673	4.06907e-79	3.29146e-77
Acinar	ENSG00000164946	ENSSSCG00000039025	FREM1	FREM1	4.71111	2.6134	352.073	1.49878e-78	1.20792e-76
Acinar	ENSG00000066468	ENSSSCG00000010698	FGFR2	FGFR2	3.31228	4.90929	352.036	1.52649e-78	1.22576e-76
Acinar	ENSG00000082516	ENSSSCG00000017066	GEMIN5	GEMIN5	-1.7042	4.08925	351.92	1.61799e-78	1.29451e-76
Acinar	ENSG00000182050	ENSSSCG00000032321	MGAT4C	MGAT4C	6.33212	2.07335	351.066	2.48371e-78	1.97995e-76
Acinar	ENSG00000089356	ENSSSCG00000024666	FXYD3	ENSSSCG00000024666	4.3261	7.05475	350.942	2.64187e-78	2.09843e-76
Acinar	ENSG00000153446	ENSSSCG00000025072	C16orf89	C16orf89	-5.5739	2.95901	349.998	4.24249e-78	3.35768e-76
Acinar	ENSG00000151892	ENSSSCG00000010655	GFRA1	GFRA1	4.0385	2.11159	349.967	4.30859e-78	3.38572e-76
Acinar	ENSG00000167535	ENSSSCG00000032967	CACNB3	CACNB3	2.90586	2.68007	349.967	4.30871e-78	3.38572e-76
Acinar	ENSG00000162878	ENSSSCG00000008468	PKDCC	PKDCC	2.18072	4.02875	349.65	5.05011e-78	3.95419e-76
Acinar	ENSG00000159409	ENSSSCG00000006618	CELF3	CELF3	3.31734	4.41687	349.192	6.35604e-78	4.95907e-76
Acinar	ENSG00000152779	ENSSSCG00000010455	SLC16A12	SLC16A12	-4.42516	7.15373	348.536	8.82999e-78	6.86493e-76
Acinar	ENSG00000143333	ENSSSCG00000015550	RGS16	RGS16	4.19119	3.31368	347.95	1.18476e-77	9.17853e-76
Acinar	ENSG00000064787	ENSSSCG00000007485	BCAS1	BCAS1	-4.68155	5.7557	347.812	1.26958e-77	9.80115e-76
Acinar	ENSG00000164742	ENSSSCG00000016726	ADCY1	ADCY1	4.03338	3.76897	347.308	1.63481e-77	1.25328e-75
Acinar	ENSG00000129007	ENSSSCG00000026517	CALML4	CALML4	3.96312	5.40798	347.044	1.86607e-77	1.4256e-75
Acinar	ENSG00000150667	ENSSSCG00000040418	FSIP1	FSIP1	3.77628	2.39349	345.187	4.73479e-77	3.57989e-75
Acinar	ENSG00000185002	ENSSSCG00000039333	RFX6	RFX6	3.67143	4.45669	344.936	5.3692e-77	4.04566e-75
Acinar	ENSG00000137142	ENSSSCG00000005360	IGFBPL1	IGFBPL1	4.73414	4.83847	344.744	5.91188e-77	4.43935e-75
Acinar	ENSG00000165661	ENSSSCG00000040163	QSOX2	QSOX2	-2.15415	4.92693	343.67	1.01285e-76	7.57981e-75
Acinar	ENSG00000070882	ENSSSCG00000016715	OSBPL3	OSBPL3	2.74863	3.94827	343.205	1.27873e-76	9.53717e-75
Acinar	ENSG00000162595	ENSSSCG00000003797	DIRAS3	DIRAS3	4.76399	9.41114	341.875	2.49152e-76	1.85197e-74
Acinar	ENSG00000136026	ENSSSCG00000000171	CKAP4	CKAP4	-2.23839	5.86199	341.757	2.64395e-76	1.95866e-74
Acinar	ENSG00000133121	ENSSSCG00000009348	STARD13	ENSSSCG00000009348	-2.21494	5.25517	340.129	5.98228e-76	4.41685e-74
Acinar	ENSG00000100379	ENSSSCG00000000135	KCTD17	KCTD17	4.74101	2.58637	339.643	7.63308e-76	5.61682e-74
Acinar	ENSG00000225556	ENSSSCG00000021540	C2CD4D	C2CD4D	3.87287	2.71735	339.418	8.54266e-76	6.26518e-74
Acinar	ENSG00000258986	ENSSSCG00000039537	TMEM179	TMEM179	4.77142	3.42075	339.378	8.71493e-76	6.3703e-74
Acinar	ENSG00000115414	ENSSSCG00000016174	FN1	FN1	3.74336	4.16513	339.296	9.08239e-76	6.61691e-74
Acinar	ENSG00000113805	ENSSSCG00000011522	CNTN3	CNTN3	2.78833	4.43927	338.481	1.36663e-75	9.9236e-74
Acinar	ENSG00000168734	ENSSSCG00000022998	PKIG	PKIG	2.52838	4.9481	337.679	2.04378e-75	1.47918e-73
Acinar	ENSG00000114019	ENSSSCG00000011643	AMOTL2	AMOTL2	2.75564	4.49959	337.164	2.64603e-75	1.90879e-73
Acinar	ENSG00000100219	ENSSSCG00000030996	XBP1	XBP1	-2.44416	9.11836	336.714	3.31468e-75	2.38332e-73
Acinar	ENSG00000115355	ENSSSCG00000008406	CCDC88A	CCDC88A	3.60706	4.95654	336.174	4.34589e-75	3.10449e-73
Acinar	ENSG00000080823	ENSSSCG00000002531	MOK	MOK	3.6522	2.59818	335.914	4.95065e-75	3.51368e-73
Acinar	ENSG00000005448	ENSSSCG00000008282	WDR54	WDR54	3.30982	3.57201	334.941	8.06449e-75	5.70531e-73
Acinar	ENSG00000172159	ENSSSCG00000010962	FRMD3	FRMD3	3.272	3.0819	334.471	1.02102e-74	7.20015e-73
Acinar	ENSG00000175497	ENSSSCG00000015711	DPP10	DPP10	4.11269	4.03814	334.24	1.14615e-74	8.05676e-73
Acinar	ENSG00000178568	ENSSSCG00000016160	ERBB4	ERBB4	4.67356	2.61456	334.096	1.23201e-74	8.63203e-73
Acinar	ENSG00000151067	ENSSSCG00000027725	CACNA1C	ENSSSCG00000027725	4.02192	2.25218	334.09	1.23584e-74	8.63203e-73
Acinar	ENSG00000135298	ENSSSCG00000004270	ADGRB3	ADGRB3	4.34325	2.0846	334.007	1.28831e-74	8.97008e-73
Acinar	ENSG00000184162	ENSSSCG00000023658	NR2C2AP	NR2C2AP	-3.10602	5.75572	333.874	1.37736e-74	9.55982e-73
Acinar	ENSG00000142583	ENSSSCG00000039651	SLC2A5	SLC2A5	-5.11791	3.83954	333.599	1.58074e-74	1.09369e-72
Acinar	ENSG00000152254	ENSSSCG00000015925	G6PC2	G6PC2	4.73074	5.97432	333.132	1.99846e-74	1.37838e-72
Acinar	ENSG00000215217	ENSSSCG00000017098	C5orf49	C5orf49	4.15323	3.93164	333.119	2.01148e-74	1.38302e-72
Acinar	ENSG00000170899	ENSSSCG00000002627	GSTA4	GSTA4	3.42841	6.07322	332.284	3.05762e-74	2.09576e-72
Acinar	ENSG00000150593	ENSSSCG00000010627	PDCD4	PDCD4	-2.53081	7.74538	332.139	3.28715e-74	2.24608e-72
Acinar	ENSG00000079689	ENSSSCG00000001101	SCGN	SCGN	4.78783	8.28809	331.991	3.54164e-74	2.41248e-72
Acinar	ENSG00000166106	ENSSSCG00000015250	ADAMTS15	ADAMTS15	4.13732	2.64833	331.974	3.57065e-74	2.42473e-72
Acinar	ENSG00000197249	ENSSSCG00000002476	SERPINA1	SERPINA1	3.63457	4.98978	331.362	4.85504e-74	3.28679e-72
Acinar	ENSG00000074657	ENSSSCG00000034704	ZNF532	ZNF532	2.36744	3.76792	331.264	5.09968e-74	3.44181e-72
Acinar	ENSG00000187094	ENSSSCG00000011277	CCK	CCK	3.82433	3.06465	329.976	9.72589e-74	6.52405e-72
Acinar	ENSG00000174776	ENSSSCG00000011738	WDR49	WDR49	-6.65479	0.853176	329.724	1.10358e-73	7.38021e-72
Acinar	ENSG00000131435	ENSSSCG00000014274	PDLIM4	PDLIM4	3.36219	3.53705	329.107	1.5042e-73	9.99863e-72
Acinar	ENSG00000105855	ENSSSCG00000015375	ITGB8	ITGB8	2.21841	4.01661	328.888	1.67849e-73	1.11235e-71
Acinar	ENSG00000109794	ENSSSCG00000015802	FAM149A	FAM149A	4.68491	1.94916	328.802	1.75311e-73	1.15485e-71
Acinar	ENSG00000151778	ENSSSCG00000040405	SERP2	SERP2	3.82234	3.64937	328.309	2.24398e-73	1.46941e-71
Acinar	ENSG00000164741	ENSSSCG00000006970	DLC1	DLC1	3.78987	3.13936	328.055	2.54922e-73	1.66433e-71
Acinar	ENSG00000004848	ENSSSCG00000020801	ARX	ARX	3.63698	4.21405	327.807	2.88635e-73	1.87886e-71
Acinar	ENSG00000113657	ENSSSCG00000036549	DPYSL3	DPYSL3	4.49723	2.54075	327.559	3.2692e-73	2.12179e-71
Acinar	ENSG00000111962	ENSSSCG00000028974	UST	UST	4.50056	2.33554	327.299	3.72381e-73	2.40974e-71
Acinar	ENSG00000185133	ENSSSCG00000030345	INPP5J	INPP5J	-2.5644	3.96386	326.75	4.90532e-73	3.16501e-71
Acinar	ENSG00000197043	ENSSSCG00000017089	ANXA6	ANXA6	3.34336	4.8324	326.447	5.70891e-73	3.67274e-71
Acinar	ENSG00000171189	ENSSSCG00000025119	GRIK1	GRIK1	4.84709	2.91633	325.256	1.03754e-72	6.65536e-71
Acinar	ENSG00000156968	ENSSSCG00000032056	MPV17L	ENSSSCG00000032056	-4.29807	4.41778	324.775	1.32055e-72	8.42165e-71
Acinar	ENSG00000112981	ENSSSCG00000027997	NME5	NME5	3.51038	2.80711	324.514	1.5056e-72	9.57406e-71
Acinar	ENSG00000171552	ENSSSCG00000035357	BCL2L1	BCL2L1	2.20722	3.28692	324.175	1.78465e-72	1.13158e-70
Acinar	ENSG00000108309	ENSSSCG00000017359	RUNDC3A	RUNDC3A	3.73909	4.47048	324.115	1.83881e-72	1.16257e-70
Acinar	ENSG00000169213	ENSSSCG00000021036	RAB3B	RAB3B	3.47026	4.2526	324.085	1.86657e-72	1.17674e-70
Acinar	ENSG00000138587	ENSSSCG00000004601	MNS1	MNS1	3.35112	4.3301	323.721	2.24061e-72	1.40851e-70
Acinar	ENSG00000101746	ENSSSCG00000003737	NOL4	NOL4	3.9955	5.31091	323.104	3.05413e-72	1.91444e-70
Acinar	ENSG00000196628	ENSSSCG00000004535	TCF4	TCF4	1.93315	6.26727	322.448	4.24399e-72	2.65274e-70
Acinar	ENSG00000174938	ENSSSCG00000029186	SEZ6L2	SEZ6L2	4.6125	4.11089	321.946	5.45855e-72	3.40224e-70
Acinar	ENSG00000152611	ENSSSCG00000031959	CAPSL	CAPSL	3.92116	4.44017	321.62	6.42763e-72	3.99493e-70
Acinar	ENSG00000072135	ENSSSCG00000015735	PTPN18	PTPN18	2.33195	6.05562	320.929	9.09186e-72	5.63491e-70
Acinar	ENSG00000128242	ENSSSCG00000010009	GAL3ST1	GAL3ST1	2.7341	3.83592	320.611	1.06636e-71	6.59044e-70
Acinar	ENSG00000116649	ENSSSCG00000027689	SRM	SRM	-4.11923	8.56551	319.963	1.47545e-71	9.09322e-70
Acinar	ENSG00000039139	ENSSSCG00000032827	DNAH5	DNAH5	4.38595	1.87764	319.225	2.13683e-71	1.31325e-69
Acinar	ENSG00000103485	ENSSSCG00000027454	QPRT	QPRT	3.6972	3.63781	317.956	4.03771e-71	2.47459e-69
Acinar	ENSG00000277972	ENSSSCG00000022187	CISD3	CISD3	-2.86221	8.27227	317.39	5.3634e-71	3.27793e-69
Acinar	ENSG00000112893	ENSSSCG00000014195	MAN2A1	MAN2A1	-1.72447	4.86991	315.101	1.69054e-70	1.03034e-68
Acinar	ENSG00000157470	ENSSSCG00000004586	FAM81A	FAM81A	3.55325	3.07824	314.971	1.80417e-70	1.09656e-68
Acinar	ENSG00000022567	ENSSSCG00000005930	SLC45A4	SLC45A4	2.77213	3.27367	314.541	2.23934e-70	1.35357e-68
Acinar	ENSG00000100583	ENSSSCG00000002400	SAMD15	ENSSSCG00000002400	4.59575	2.55306	313.094	4.62646e-70	2.78881e-68
Acinar	ENSG00000100373	ENSSSCG00000031423	UPK3A	UPK3A	3.0324	3.38132	312.583	5.9768e-70	3.59294e-68
Acinar	ENSG00000187391	ENSSSCG00000031780	MAGI2	MAGI2	4.36837	2.53888	312.501	6.22823e-70	3.73389e-68
Acinar	ENSG00000065609	ENSSSCG00000004453	SNAP91	SNAP91	4.52261	3.07945	312.045	7.8277e-70	4.66735e-68
Acinar	ENSG00000165617	ENSSSCG00000031856	DACT1	DACT1	-3.15282	2.92431	312.027	7.90205e-70	4.69894e-68
Acinar	ENSG00000112137	ENSSSCG00000001052	PHACTR1	PHACTR1	3.23505	2.90725	311.431	1.0656e-69	6.31953e-68
Acinar	ENSG00000084636	ENSSSCG00000003603	COL16A1	COL16A1	3.13869	3.12589	310.08	2.0975e-69	1.24057e-67
Acinar	ENSG00000139737	ENSSSCG00000009475	SLAIN1	SLAIN1	2.23873	3.19529	310.043	2.13777e-69	1.261e-67
Acinar	ENSG00000138207	ENSSSCG00000010479	RBP4	RBP4	4.66577	5.94384	308.02	5.896e-69	3.46855e-67
Acinar	ENSG00000128573	ENSSSCG00000016639	FOXP2	FOXP2	-1.90136	4.58431	306.949	1.00893e-68	5.90383e-67
Acinar	ENSG00000173826	ENSSSCG00000017295	KCNH6	KCNH6	4.63381	3.14513	305.116	2.53081e-68	1.477e-66
Acinar	ENSG00000163050	ENSSSCG00000010861	COQ8A	COQ8A	-1.66603	5.62162	305.099	2.55217e-68	1.48552e-66
Acinar	ENSG00000138759	ENSSSCG00000008991	FRAS1	FRAS1	3.10608	3.49831	304.217	3.97176e-68	2.30572e-66
Acinar	ENSG00000204262	ENSSSCG00000016035	COL5A2	COL5A2	3.58967	5.14339	304.003	4.42338e-68	2.56114e-66
Acinar	ENSG00000153936	ENSSSCG00000022032	HS2ST1	ENSSSCG00000022032	-1.81	5.16171	303.753	5.01258e-68	2.89467e-66
Acinar	ENSG00000167210	ENSSSCG00000004503	LOXHD1	LOXHD1	-2.82058	3.35666	303.571	5.49398e-68	3.16436e-66
Acinar	ENSG00000159713	ENSSSCG00000035983	TPPP3	TPPP3	2.61331	4.14609	303.516	5.64691e-68	3.24395e-66
Acinar	ENSG00000229894	ENSSSCG00000012202	GK3P	ENSSSCG00000012202	2.68063	2.70253	303.27	6.38702e-68	3.65956e-66
Acinar	ENSG00000198814	ENSSSCG00000012202	GK	ENSSSCG00000012202	2.68063	2.70253	303.27	6.38702e-68	3.65956e-66
Acinar	ENSG00000150594	ENSSSCG00000010629	ADRA2A	ADRA2A	4.32297	3.02296	301.096	1.90078e-67	1.08344e-65
Acinar	ENSG00000164100	ENSSSCG00000009115	NDST3	NDST3	4.55955	2.84995	300.825	2.17824e-67	1.23839e-65
Acinar	ENSG00000112218	ENSSSCG00000035240	GPR63	GPR63	-2.69091	4.04314	300.618	2.41647e-67	1.36676e-65
Acinar	ENSG00000173114	ENSSSCG00000016652	LRRN3	LRRN3	4.05072	3.49549	300.55	2.49986e-67	1.41031e-65
Acinar	ENSG00000149809	ENSSSCG00000013004	TM7SF2	TM7SF2	2.46711	4.67594	299.947	3.38267e-67	1.90347e-65
Acinar	ENSG00000148053	ENSSSCG00000010959	NTRK2	NTRK2	5.50415	1.46089	299.865	3.52523e-67	1.97863e-65
Acinar	ENSG00000006468	ENSSSCG00000024591	ETV1	ETV1	4.7115	5.02355	299.8	3.64125e-67	2.03855e-65
Acinar	ENSG00000107018	ENSSSCG00000005216	RLN1	ENSSSCG00000005216	-5.27759	2.70732	298.989	5.47086e-67	3.05507e-65
Acinar	ENSG00000107014	ENSSSCG00000005216	RLN2	ENSSSCG00000005216	-5.27759	2.70732	298.989	5.47086e-67	3.05507e-65
Acinar	ENSG00000120211	ENSSSCG00000005216	INSL4	ENSSSCG00000005216	-5.27759	2.70732	298.989	5.47086e-67	3.05507e-65
Acinar	ENSG00000115896	ENSSSCG00000016083	PLCL1	PLCL1	-3.29123	5.04847	298.978	5.50024e-67	3.0637e-65
Acinar	ENSG00000214226	ENSSSCG00000030781	C17orf67	C17orf67	4.50229	2.92256	298.94	5.607e-67	3.11528e-65
Acinar	ENSG00000139910	ENSSSCG00000024396	NOVA1	NOVA1	3.48206	5.41093	298.348	7.54731e-67	4.18277e-65
Acinar	ENSG00000153902	ENSSSCG00000025126	LGI4	LGI4	4.15507	4.50406	298.277	7.82081e-67	4.32346e-65
Acinar	ENSG00000183960	ENSSSCG00000011204	KCNH8	KCNH8	3.81594	2.13376	298.078	8.63834e-67	4.75152e-65
Acinar	ENSG00000115232	ENSSSCG00000016009	ITGA4	ITGA4	4.37872	2.8396	297.922	9.34142e-67	5.12543e-65
Acinar	ENSG00000143061	ENSSSCG00000006737	IGSF3	IGSF3	3.66307	2.72396	297.419	1.20275e-66	6.58282e-65
Acinar	ENSG00000178882	ENSSSCG00000035760	RFLNA	ENSSSCG00000035760	-3.09067	2.95207	297.212	1.33431e-66	7.28471e-65
Acinar	ENSG00000114251	ENSSSCG00000035859	WNT5A	WNT5A	-5.80368	2.35697	296.762	1.67224e-66	9.10709e-65
Acinar	ENSG00000163885	ENSSSCG00000001826	CFAP100	CFAP100	3.9476	2.48404	296.707	1.71899e-66	9.31557e-65
Acinar	ENSG00000188452	ENSSSCG00000016010	CERKL	CERKL	6.0608	3.95659	295.093	3.86236e-66	2.08283e-64
Acinar	ENSG00000188763	ENSSSCG00000023004	FZD9	FZD9	-4.32373	3.68408	294.92	4.21169e-66	2.26566e-64
Acinar	ENSG00000145882	ENSSSCG00000014433	PCYOX1L	PCYOX1L	2.20959	3.7084	294.636	4.85669e-66	2.60389e-64
Acinar	ENSG00000110318	ENSSSCG00000014979	CEP126	CEP126	3.72072	4.43997	294.633	4.86409e-66	2.60389e-64
Acinar	ENSG00000125844	ENSSSCG00000024692	RRBP1	RRBP1	-2.57754	7.96458	293.502	8.58079e-66	4.58239e-64
Acinar	ENSG00000117519	ENSSSCG00000006887	CNN3	CNN3	2.69088	6.14946	293.15	1.02402e-65	5.44213e-64
Acinar	ENSG00000162753	ENSSSCG00000015489	SLC9C2	SLC9C2	2.85897	2.56843	293.153	1.0224e-65	5.44213e-64
Acinar	ENSG00000114113	ENSSSCG00000011663	RBP2	RBP2	4.72973	4.9872	292.354	1.5261e-65	8.09093e-64
Acinar	ENSG00000183709	ENSSSCG00000035185	IFNL2	ENSSSCG00000035185	-4.00487	2.40365	292.076	1.75498e-65	9.28198e-64
Acinar	ENSG00000197110	ENSSSCG00000035185	IFNL3	ENSSSCG00000035185	-4.00487	2.40365	292.076	1.75498e-65	9.28198e-64
Acinar	ENSG00000171522	ENSSSCG00000024439	PTGER4	PTGER4	-3.14144	3.94956	292.05	1.77825e-65	9.38251e-64
Acinar	ENSG00000143753	ENSSSCG00000024484	DEGS1	DEGS1	1.65923	4.94442	292.003	1.81996e-65	9.5796e-64
Acinar	ENSG00000143753	ENSSSCG00000024484	DEGS1	DEGS1	1.65923	4.94442	292.003	1.81996e-65	9.5796e-64
Acinar	ENSG00000188338	ENSSSCG00000011397	SLC38A3	SLC38A3	-3.74227	4.16646	291.779	2.03715e-65	1.06972e-63
Acinar	ENSG00000185339	ENSSSCG00000010011	TCN2	TCN2	2.39784	4.13143	291.168	2.76683e-65	1.44942e-63
Acinar	ENSG00000092929	ENSSSCG00000017200	UNC13D	UNC13D	3.30134	3.30717	290.645	3.59747e-65	1.88008e-63
Acinar	ENSG00000163497	ENSSSCG00000035988	FEV	FEV	5.26739	4.95719	290.508	3.85307e-65	2.00889e-63
Acinar	ENSG00000144460	ENSSSCG00000016239	NYAP2	NYAP2	5.16391	2.34011	290.41	4.04879e-65	2.10595e-63
Acinar	ENSG00000153303	ENSSSCG00000004017	FRMD1	ENSSSCG00000004017	3.33536	4.49514	290.084	4.76655e-65	2.46761e-63
Acinar	ENSG00000148516	ENSSSCG00000011025	ZEB1	ZEB1	3.94776	4.80784	289.839	5.39086e-65	2.78427e-63
Acinar	ENSG00000059122	ENSSSCG00000028381	FLYWCH1	FLYWCH1	3.41206	2.67451	289.733	5.68616e-65	2.9299e-63
Acinar	ENSG00000144868	ENSSSCG00000011635	TMEM108	TMEM108	4.4079	1.76899	289.286	7.11559e-65	3.65788e-63
Acinar	ENSG00000244274	ENSSSCG00000033586	DBNDD2	DBNDD2	2.10486	3.37499	288.738	9.3663e-65	4.80367e-63
Acinar	ENSG00000153814	ENSSSCG00000016691	JAZF1	JAZF1	3.77989	4.76553	287.814	1.48925e-64	7.62014e-63
Acinar	ENSG00000157827	ENSSSCG00000015866	FMNL2	FMNL2	-2.53083	5.99925	287.372	1.85877e-64	9.48876e-63
Acinar	ENSG00000116885	ENSSSCG00000036709	OSCP1	OSCP1	2.11771	4.00376	286.133	3.46134e-64	1.76288e-62
Acinar	ENSG00000187244	ENSSSCG00000020657	BCAM	BCAM	1.9037	6.20182	285.862	3.96374e-64	2.01409e-62
Acinar	ENSG00000183734	ENSSSCG00000033507	ASCL2	ASCL2	5.49481	3.10281	285.608	4.50446e-64	2.28357e-62
Acinar	ENSG00000126217	ENSSSCG00000021158	MCF2L	MCF2L	-1.61711	6.22879	285.543	4.65273e-64	2.35332e-62
Acinar	ENSG00000156103	ENSSSCG00000006132	MMP16	MMP16	4.61365	2.30386	284.179	9.22451e-64	4.65499e-62
Acinar	ENSG00000139540	ENSSSCG00000000385	SLC39A5	SLC39A5	-3.92942	6.65815	283.383	1.37507e-63	6.89165e-62
Acinar	ENSG00000005700	ENSSSCG00000004460	IBTK	IBTK	-2.04394	5.83299	282.998	1.66854e-63	8.34346e-62
Acinar	ENSG00000079215	ENSSSCG00000016841	SLC1A3	SLC1A3	-5.4895	1.1639	282.867	1.78127e-63	8.88696e-62
Acinar	ENSG00000036828	ENSSSCG00000011878	CASR	CASR	5.10146	3.29079	282.578	2.05924e-63	1.02505e-61
Acinar	ENSG00000164116	ENSSSCG00000008866	GUCY1A1	GUCY1A1	2.48725	6.41206	282.573	2.06512e-63	1.02566e-61
Acinar	ENSG00000072315	ENSSSCG00000012587	TRPC5	TRPC5	4.12699	3.73515	282.032	2.70957e-63	1.3427e-61
Acinar	ENSG00000200983	ENSSSCG00000039963	SNORA3A	ENSSSCG00000039963	-2.25891	6.63323	281.512	3.51634e-63	1.73857e-61
Acinar	ENSG00000075223	ENSSSCG00000023784	SEMA3C	SEMA3C	2.95154	4.47904	280.559	5.67285e-63	2.79226e-61
Acinar	ENSG00000176046	ENSSSCG00000040162	NUPR1	NUPR1	-4.14053	8.01682	279.638	9.0066e-63	4.42329e-61
Acinar	ENSG00000166123	ENSSSCG00000002847	GPT2	GPT2	-3.01624	4.9086	279.565	9.3406e-63	4.5771e-61
Acinar	ENSG00000167771	ENSSSCG00000013049	RCOR2	RCOR2	2.16401	3.31572	279.431	9.99018e-63	4.88453e-61
Acinar	ENSG00000198944	ENSSSCG00000014286	SOWAHA	SOWAHA	4.22588	3.01838	279.335	1.04844e-62	5.11479e-61
Acinar	ENSG00000111674	ENSSSCG00000028373	ENO2	ENO2	4.41606	4.44601	279.267	1.08472e-62	5.2801e-61
Acinar	ENSG00000163394	ENSSSCG00000023501	CCKAR	CCKAR	-5.00445	6.64913	279.137	1.15759e-62	5.62234e-61
Acinar	ENSG00000143412	ENSSSCG00000006643	ANXA9	ANXA9	3.27408	3.34156	278.884	1.31439e-62	6.36988e-61
Acinar	ENSG00000132639	ENSSSCG00000026985	SNAP25	SNAP25	4.15307	5.62458	278.207	1.84613e-62	8.92716e-61
Acinar	ENSG00000175161	ENSSSCG00000011999	CADM2	CADM2	4.78824	3.68091	277.717	2.36071e-62	1.13904e-60
Acinar	ENSG00000160050	ENSSSCG00000031514	CCDC28B	CCDC28B	3.6527	3.74374	277.134	3.16273e-62	1.52268e-60
Acinar	ENSG00000207954	ENSSSCG00000019971	MIR138-1	ssc-mir-138	5.30232	1.54257	276.767	3.80224e-62	1.82259e-60
Acinar	ENSG00000163536	ENSSSCG00000011740	SERPINI1	SERPINI1	1.7786	6.1003	275.843	6.04752e-62	2.89256e-60
Acinar	ENSG00000243232	ENSSSCG00000029281	PCDHAC2	PCDHAC2	3.36828	3.24588	275.788	6.21517e-62	2.96629e-60
Acinar	ENSG00000108582	ENSSSCG00000017799	CPD	CPD	1.73171	6.07266	274.654	1.09807e-61	5.22936e-60
Acinar	ENSG00000163531	ENSSSCG00000022951	NFASC	NFASC	3.38343	3.2292	273.943	1.56865e-61	7.43822e-60
Acinar	ENSG00000181444	ENSSSCG00000039041	ZNF467	ZNF467	3.54122	1.93495	273.928	1.5803e-61	7.47738e-60
Acinar	ENSG00000178573	ENSSSCG00000040607	MAF	MAF	-1.86519	4.41031	273.374	2.08709e-61	9.85413e-60
Acinar	ENSG00000198569	ENSSSCG00000040105	SLC34A3	SLC34A3	4.29425	4.39755	272.933	2.60406e-61	1.22686e-59
Acinar	ENSG00000171310	ENSSSCG00000000837	CHST11	CHST11	3.12166	2.28247	272.917	2.62525e-61	1.2342e-59
Acinar	ENSG00000140450	ENSSSCG00000002252	ARRDC4	ARRDC4	-1.75172	5.07137	272.79	2.79837e-61	1.31279e-59
Acinar	ENSG00000182809	ENSSSCG00000038713	CRIP2	ENSSSCG00000038713	2.47163	4.74349	272.604	3.07225e-61	1.4382e-59
Acinar	ENSG00000155886	ENSSSCG00000005167	SLC24A2	SLC24A2	5.0916	2.60675	272.513	3.21463e-61	1.50166e-59
Acinar	ENSG00000157315	ENSSSCG00000002761	TMED6	ENSSSCG00000002761	-2.54728	5.51342	272.355	3.48044e-61	1.62239e-59
Acinar	ENSG00000137266	ENSSSCG00000001004	SLC22A23	SLC22A23	-2.75004	7.02009	272.245	3.6776e-61	1.71067e-59
Acinar	ENSG00000163673	ENSSSCG00000011241	DCLK3	DCLK3	4.66155	2.49564	272.061	4.03482e-61	1.86893e-59
Acinar	ENSG00000243449	ENSSSCG00000008686	C4orf48	ENSSSCG00000008686	4.14657	6.33219	271.879	4.42012e-61	2.0431e-59
Acinar	ENSG00000177519	ENSSSCG00000037225	RPRM	RPRM	4.38783	1.5092	271.271	5.99652e-61	2.75439e-59
Acinar	ENSG00000111961	ENSSSCG00000033175	SASH1	SASH1	3.46546	3.52339	270.886	7.27582e-61	3.32812e-59
Acinar	ENSG00000170498	ENSSSCG00000038350	KISS1	KISS1	-2.67785	4.45737	270.889	7.26418e-61	3.32812e-59
Acinar	ENSG00000170498	ENSSSCG00000038350	KISS1	KISS1	-2.67785	4.45737	270.889	7.26418e-61	3.32812e-59
Acinar	ENSG00000084628	ENSSSCG00000032193	NKAIN1	NKAIN1	-4.37582	3.39471	270.282	9.85133e-61	4.49687e-59
Acinar	ENSG00000134369	ENSSSCG00000010915	NAV1	NAV1	3.83033	1.7396	269.786	1.26348e-60	5.74362e-59
Acinar	ENSG00000197415	ENSSSCG00000011726	VEPH1	VEPH1	3.58553	3.83273	269.266	1.64029e-60	7.41059e-59
Acinar	ENSG00000160345	ENSSSCG00000036914	C9orf116	C9orf116	3.83218	2.72483	269.186	1.70712e-60	7.69672e-59
Acinar	ENSG00000185418	ENSSSCG00000005781	TARS3	TARS3	-1.65448	5.34615	269.037	1.84e-60	8.27888e-59
Acinar	ENSG00000100300	ENSSSCG00000000033	TSPO	TSPO	3.63552	3.18934	268.836	2.03466e-60	9.13606e-59
Acinar	ENSG00000122591	ENSSSCG00000015386	FAM126A	FAM126A	-2.07702	5.57007	268.752	2.12312e-60	9.51383e-59
Acinar	ENSG00000179241	ENSSSCG00000013294	LDLRAD3	LDLRAD3	2.00797	3.41822	268.264	2.71202e-60	1.21034e-58
Acinar	ENSG00000171476	ENSSSCG00000008898	HOPX	ENSSSCG00000008898	4.6228	7.60383	267.989	3.11256e-60	1.38629e-58
Acinar	ENSG00000078018	ENSSSCG00000016151	MAP2	MAP2	2.29134	5.69584	267.949	3.17659e-60	1.41195e-58
Acinar	ENSG00000207051	ENSSSCG00000019590	SNORA27	SNORA27	-2.08554	3.87541	267.602	3.78064e-60	1.67705e-58
Acinar	ENSG00000176485	ENSSSCG00000026914	PLAAT3	PLAAT3	2.23987	4.14078	267.282	4.43807e-60	1.96077e-58
Acinar	ENSG00000154122	ENSSSCG00000016784	ANKH	ANKH	2.96012	3.37204	266.944	5.26044e-60	2.3148e-58
Acinar	ENSG00000164756	ENSSSCG00000006011	SLC30A8	SLC30A8	4.41275	4.98763	266.352	7.07974e-60	3.09679e-58
Acinar	ENSG00000168646	ENSSSCG00000017265	AXIN2	AXIN2	-1.98241	4.01314	266.271	7.37401e-60	3.21911e-58
Acinar	ENSG00000106069	ENSSSCG00000016687	CHN2	ENSSSCG00000016687	-2.60872	5.69127	266.126	7.92805e-60	3.45412e-58
Acinar	ENSG00000100644	ENSSSCG00000005096	HIF1A	HIF1A	1.63909	4.68421	265.164	1.28525e-59	5.58856e-58
Acinar	ENSG00000123131	ENSSSCG00000012171	PRDX4	PRDX4	-2.81758	8.57106	264.985	1.40552e-59	6.09945e-58
Acinar	ENSG00000177679	ENSSSCG00000032250	SRRM3	SRRM3	4.64776	2.05067	263.779	2.57542e-59	1.11544e-57
Acinar	ENSG00000085276	ENSSSCG00000011743	MECOM	MECOM	-3.88582	6.18154	263.348	3.19776e-59	1.37955e-57
Acinar	ENSG00000153898	ENSSSCG00000003755	MCOLN2	MCOLN2	-4.42074	3.35388	263.341	3.20765e-59	1.38111e-57
Acinar	ENSG00000183862	ENSSSCG00000012753	CNGA2	CNGA2	-4.53448	1.65634	262.997	3.81216e-59	1.63819e-57
Acinar	ENSG00000144366	ENSSSCG00000016033	GULP1	GULP1	3.52936	2.38636	262.949	3.90538e-59	1.67497e-57
Acinar	ENSG00000129646	ENSSSCG00000021342	QRICH2	QRICH2	-3.98789	2.75588	261.381	8.58122e-59	3.6661e-57
Acinar	ENSG00000132122	ENSSSCG00000003881	SPATA6	SPATA6	3.98517	2.45653	260.964	1.05783e-58	4.51052e-57
Acinar	ENSG00000151789	ENSSSCG00000011208	ZNF385D	ZNF385D	5.2845	2.32976	260.705	1.2049e-58	5.10793e-57
Acinar	ENSG00000095981	ENSSSCG00000037484	KCNK16	KCNK16	5.25375	5.90485	260.524	1.31896e-58	5.58074e-57
Acinar	ENSG00000153066	ENSSSCG00000007896	TXNDC11	TXNDC11	-1.5846	5.72121	260.472	1.35426e-58	5.71908e-57
Acinar	ENSG00000121361	ENSSSCG00000000573	KCNJ8	KCNJ8	4.71727	2.10616	260.42	1.39007e-58	5.85907e-57
Acinar	ENSG00000269743	ENSSSCG00000012540	SLC25A53	SLC25A53	4.09353	4.52515	260.32	1.46128e-58	6.14742e-57
Acinar	ENSG00000100146	ENSSSCG00000039315	SOX10	SOX10	3.78781	2.70842	260.28	1.49115e-58	6.24918e-57
Acinar	ENSG00000187486	ENSSSCG00000042162	KCNJ11	KCNJ11	4.1383	4.65999	260.12	1.61599e-58	6.75951e-57
Acinar	ENSG00000142694	ENSSSCG00000033892	EVA1B	EVA1B	-2.52274	4.31975	259.894	1.81011e-58	7.55711e-57
Acinar	ENSG00000132004	ENSSSCG00000013725	FBXW9	FBXW9	2.0536	3.8272	259.43	2.2846e-58	9.50202e-57
Acinar	ENSG00000256061	ENSSSCG00000004608	DNAAF4	DNAAF4	4.04279	3.25161	259.422	2.29345e-58	9.52085e-57
Acinar	ENSG00000256061	ENSSSCG00000004608	DNAAF4	DNAAF4	4.04279	3.25161	259.422	2.29345e-58	9.52085e-57
Acinar	ENSG00000196220	ENSSSCG00000033624	SRGAP3	SRGAP3	3.26191	2.91659	258.714	3.27242e-58	1.35338e-56
Acinar	ENSG00000107130	ENSSSCG00000039311	NCS1	NCS1	2.84388	2.9178	258.65	3.37857e-58	1.39466e-56
Acinar	ENSG00000074317	ENSSSCG00000014053	SNCB	SNCB	4.66064	2.11594	258.327	3.97394e-58	1.63735e-56
Acinar	ENSG00000198018	ENSSSCG00000010540	ENTPD7	ENTPD7	-1.63387	4.57357	258.237	4.15681e-58	1.7095e-56
Acinar	ENSG00000215545	ENSSSCG00000007215	DEFB116	ENSSSCG00000007215	5.18692	2.06624	257.63	5.63831e-58	2.31444e-56
Acinar	ENSG00000184305	ENSSSCG00000022986	CCSER1	CCSER1	3.02866	2.22721	257.533	5.91871e-58	2.42502e-56
Acinar	ENSG00000137648	ENSSSCG00000015086	TMPRSS4	TMPRSS4	-4.25235	5.68344	257.469	6.11398e-58	2.50037e-56
Acinar	ENSG00000133142	ENSSSCG00000012530	TCEAL4	ENSSSCG00000012530	4.32101	2.58812	257.318	6.59402e-58	2.69168e-56
Acinar	ENSG00000184905	ENSSSCG00000012530	TCEAL2	ENSSSCG00000012530	4.32101	2.58812	257.318	6.59402e-58	2.69168e-56
Acinar	ENSG00000104368	ENSSSCG00000007032	PLAT	PLAT	4.26856	2.76498	257.164	7.12323e-58	2.89695e-56
Acinar	ENSG00000132819	ENSSSCG00000007504	RBM38	RBM38	-1.68293	3.52662	256.857	8.31137e-58	3.37392e-56
Acinar	ENSG00000127585	ENSSSCG00000008006	FBXL16	FBXL16	4.17508	2.71379	256.293	1.10282e-57	4.46857e-56
Acinar	ENSG00000137575	ENSSSCG00000006237	SDCBP	SDCBP	1.69661	6.71796	255.792	1.41852e-57	5.73718e-56
Acinar	ENSG00000111647	ENSSSCG00000026697	UHRF1BP1L	UHRF1BP1L	2.23432	3.73449	255.513	1.6312e-57	6.58526e-56
Acinar	ENSG00000205220	ENSSSCG00000031781	PSMB10	PSMB10	-3.87947	8.3824	255.474	1.66347e-57	6.70323e-56
Acinar	ENSG00000132677	ENSSSCG00000035121	RHBG	RHBG	-3.78245	1.40893	255.155	1.95277e-57	7.84029e-56
Acinar	ENSG00000132677	ENSSSCG00000035121	RHBG	RHBG	-3.78245	1.40893	255.155	1.95277e-57	7.84029e-56
Acinar	ENSG00000109084	ENSSSCG00000033123	TMEM97	TMEM97	-2.08216	6.84701	255.003	2.10754e-57	8.44629e-56
Acinar	ENSG00000176641	ENSSSCG00000004902	RNF152	RNF152	3.24388	4.4015	254.488	2.72951e-57	1.0919e-55
Acinar	ENSG00000266094	ENSSSCG00000031970	RASSF5	RASSF5	3.57632	2.07665	254.347	2.92959e-57	1.16982e-55
Acinar	ENSG00000100994	ENSSSCG00000022815	PYGB	PYGB	2.98669	4.04139	254.148	3.23707e-57	1.29025e-55
Acinar	ENSG00000157005	ENSSSCG00000033815	SST	SST	5.13483	12.3615	254.021	3.44953e-57	1.37245e-55
Acinar	ENSG00000170381	ENSSSCG00000015399	SEMA3E	SEMA3E	4.76711	1.85103	253.965	3.5485e-57	1.40928e-55
Acinar	ENSG00000156687	ENSSSCG00000015830	UNC5D	UNC5D	4.98499	2.67708	253.846	3.76746e-57	1.49354e-55
Acinar	ENSG00000203780	ENSSSCG00000010745	FANK1	FANK1	2.75866	3.1684	252.766	6.47809e-57	2.55432e-55
Acinar	ENSG00000108846	ENSSSCG00000017561	ABCC3	ABCC3	3.26173	1.91886	252.644	6.88634e-57	2.71043e-55
Acinar	ENSG00000240505	ENSSSCG00000040134	TNFRSF13B	ENSSSCG00000040134	2.11843	4.27723	252.164	8.76532e-57	3.44383e-55
Acinar	ENSG00000109339	ENSSSCG00000009228	MAPK10	MAPK10	2.99862	2.58691	252.028	9.38365e-57	3.6802e-55
Acinar	ENSG00000237289	ENSSSCG00000004703	CKMT1B	ENSSSCG00000004703	3.89518	2.94679	251.879	1.0111e-56	3.9584e-55
Acinar	ENSG00000223572	ENSSSCG00000004703	CKMT1A	ENSSSCG00000004703	3.89518	2.94679	251.879	1.0111e-56	3.9584e-55
Acinar	ENSG00000187240	ENSSSCG00000033937	DYNC2H1	DYNC2H1	1.83537	3.95535	251.74	1.08396e-56	4.23611e-55
Acinar	ENSG00000176406	ENSSSCG00000031957	RIMS2	RIMS2	2.80508	4.23082	251.598	1.16416e-56	4.54147e-55
Acinar	ENSG00000133169	ENSSSCG00000039273	BEX1	ENSSSCG00000039273	3.51688	7.54022	251.28	1.36551e-56	5.31753e-55
Acinar	ENSG00000133134	ENSSSCG00000039273	BEX2	ENSSSCG00000039273	3.51688	7.54022	251.28	1.36551e-56	5.31753e-55
Acinar	ENSG00000132872	ENSSSCG00000037079	SYT4	SYT4	4.95707	3.20579	251.007	1.56661e-56	6.08983e-55
Acinar	ENSG00000196976	ENSSSCG00000017446	LAGE3	ENSSSCG00000017446	3.67943	3.26405	250.464	2.05683e-56	7.96731e-55
Acinar	ENSG00000150893	ENSSSCG00000009364	FREM2	FREM2	-2.79376	4.77556	250.447	2.07525e-56	8.02455e-55
Acinar	ENSG00000197121	ENSSSCG00000016073	PGAP1	PGAP1	2.20299	4.84418	250.352	2.17674e-56	8.40221e-55
Acinar	ENSG00000133315	ENSSSCG00000013043	MACROD1	MACROD1	-2.27025	5.43343	249.928	2.69281e-56	1.0376e-54
Acinar	ENSG00000179588	ENSSSCG00000040875	ZFPM1	ZFPM1	-1.99991	3.91478	249.691	3.03279e-56	1.16453e-54
Acinar	ENSG00000168818	ENSSSCG00000038731	STX18	STX18	1.58104	4.58229	249.201	3.87862e-56	1.48671e-54
Acinar	ENSG00000077348	ENSSSCG00000003015	EXOSC5	EXOSC5	-2.79128	5.117	249.136	4.00729e-56	1.53336e-54
Acinar	ENSG00000167522	ENSSSCG00000039541	ANKRD11	ANKRD11	-1.34342	5.09707	249.097	4.08531e-56	1.5605e-54
Acinar	ENSG00000134216	ENSSSCG00000023706	CHIA	CHIA	4.25142	6.95028	248.852	4.61983e-56	1.76162e-54
Acinar	ENSG00000175727	ENSSSCG00000009794	MLXIP	MLXIP	-1.71674	5.77786	248.796	4.75369e-56	1.80953e-54
Acinar	ENSG00000128274	ENSSSCG00000026962	A4GALT	A4GALT	-4.31093	6.97737	248.789	4.77012e-56	1.81265e-54
Acinar	ENSG00000182985	ENSSSCG00000031831	CADM1	CADM1	1.85956	6.65722	248.604	5.23257e-56	1.98495e-54
Acinar	ENSG00000167244	ENSSSCG00000035293	IGF2	ENSSSCG00000035293	4.30702	9.81256	248.5	5.51286e-56	2.08767e-54
Acinar	ENSG00000142910	ENSSSCG00000003600	TINAGL1	TINAGL1	3.46578	2.80743	247.781	7.90998e-56	2.9903e-54
Acinar	ENSG00000141837	ENSSSCG00000013754	CACNA1A	ENSSSCG00000013754	3.88948	5.08014	247.532	8.96366e-56	3.37125e-54
Acinar	ENSG00000188488	ENSSSCG00000002481	SERPINA5	SERPINA5	-5.1393	3.37177	247.338	9.8828e-56	3.7106e-54
Acinar	ENSG00000146090	ENSSSCG00000014011	RASGEF1C	RASGEF1C	-4.16393	1.72774	247.195	1.06167e-55	3.97937e-54
Acinar	ENSG00000101460	ENSSSCG00000007281	MAP1LC3A	MAP1LC3A	2.51396	6.15392	247.189	1.06495e-55	3.98489e-54
Acinar	ENSG00000091972	ENSSSCG00000027820	CD200	CD200	3.45106	5.07751	246.973	1.18662e-55	4.43258e-54
Acinar	ENSG00000102572	ENSSSCG00000009511	STK24	STK24	-1.78523	5.35725	246.911	1.2241e-55	4.56487e-54
Acinar	ENSG00000152582	ENSSSCG00000016831	SPEF2	SPEF2	2.72	3.89523	246.652	1.39406e-55	5.18987e-54
Acinar	ENSG00000121905	ENSSSCG00000032664	HPCA	HPCA	4.14797	1.64573	246.638	1.40388e-55	5.21761e-54
Acinar	ENSG00000102265	ENSSSCG00000012277	TIMP1	TIMP1	2.64358	4.61528	245.813	2.12437e-55	7.88203e-54
Acinar	ENSG00000163545	ENSSSCG00000038471	NUAK2	NUAK2	2.20195	3.69109	245.668	2.28545e-55	8.46538e-54
Acinar	ENSG00000013293	ENSSSCG00000011748	SLC7A14	SLC7A14	6.10225	1.40574	245.211	2.87474e-55	1.06303e-53
Acinar	ENSG00000183010	ENSSSCG00000034723	PYCR1	PYCR1	-2.8312	5.00584	245.155	2.9557e-55	1.09113e-53
Acinar	ENSG00000058404	ENSSSCG00000039535	CAMK2B	CAMK2B	4.31205	3.66795	244.779	3.5707e-55	1.31596e-53
Acinar	ENSG00000101443	ENSSSCG00000033003	WFDC2	WFDC2	2.51117	7.12339	244.472	4.16568e-55	1.53266e-53
Acinar	ENSG00000104723	ENSSSCG00000021988	TUSC3	TUSC3	3.01014	6.99498	244.282	4.58297e-55	1.68057e-53
Acinar	ENSG00000100271	ENSSSCG00000000035	TTLL1	TTLL1	1.94983	3.7501	243.975	5.34634e-55	1.95724e-53
Acinar	ENSG00000152932	ENSSSCG00000031796	RAB3C	RAB3C	3.93524	4.91033	243.692	6.16174e-55	2.252e-53
Acinar	ENSG00000163584	ENSSSCG00000036114	RPL22L1	ENSSSCG00000036114	-2.81758	10.4097	243.602	6.44633e-55	2.34433e-53
Acinar	ENSG00000095932	ENSSSCG00000038067	SMIM24	ENSSSCG00000038067	3.18785	4.70185	243.233	7.76023e-55	2.8175e-53
Acinar	ENSG00000091844	ENSSSCG00000004075	RGS17	RGS17	3.48142	4.76042	243.03	8.58972e-55	3.11352e-53
Acinar	ENSG00000134508	ENSSSCG00000003705	CABLES1	CABLES1	-2.35632	2.93259	242.45	1.14955e-54	4.15992e-53
Acinar	ENSG00000117151	ENSSSCG00000003758	CTBS	CTBS	-3.19772	4.78003	242.167	1.3249e-54	4.78661e-53
Acinar	ENSG00000115718	ENSSSCG00000023693	PROC	PROC	-2.6116	3.68952	242.155	1.33296e-54	4.80782e-53
Acinar	ENSG00000099284	ENSSSCG00000031713	MACROH2A2	MACROH2A2	1.75114	5.31701	242.106	1.36638e-54	4.92031e-53
Acinar	ENSG00000166086	ENSSSCG00000015256	JAM3	JAM3	4.18312	1.16292	241.981	1.4544e-54	5.22869e-53
Acinar	ENSG00000118257	ENSSSCG00000026383	NRP2	NRP2	4.16761	1.7629	241.593	1.76752e-54	6.34404e-53
Acinar	ENSG00000130940	ENSSSCG00000003407	CASZ1	CASZ1	2.88679	2.29151	241.517	1.83635e-54	6.58036e-53
Acinar	ENSG00000134245	ENSSSCG00000006780	WNT2B	WNT2B	-2.32968	2.46151	241.464	1.88568e-54	6.74614e-53
Acinar	ENSG00000164713	ENSSSCG00000037605	BRI3	BRI3	-2.08599	7.52329	241.067	2.30126e-54	8.20621e-53
Acinar	ENSG00000046653	ENSSSCG00000012126	GPM6B	GPM6B	2.90498	2.74511	241.063	2.30614e-54	8.21032e-53
Acinar	ENSG00000150867	ENSSSCG00000011079	PIP4K2A	PIP4K2A	-2.01842	4.83994	241.003	2.37735e-54	8.45014e-53
Acinar	ENSG00000120256	ENSSSCG00000004101	LRP11	LRP11	3.74331	4.11206	240.957	2.43259e-54	8.63255e-53
Acinar	ENSG00000144583	ENSSSCG00000016176	MARCHF4	MARCHF4	4.33395	2.45712	240.8	2.63127e-54	9.32257e-53
Acinar	ENSG00000166073	ENSSSCG00000004787	GPR176	GPR176	-2.0161	4.47637	240.733	2.7217e-54	9.62748e-53
Acinar	ENSG00000088756	ENSSSCG00000021612	ARHGAP28	ARHGAP28	3.82067	2.02421	240.579	2.94085e-54	1.0386e-52
Acinar	ENSG00000087903	ENSSSCG00000035403	RFX2	RFX2	4.15361	3.37493	240.486	3.0811e-54	1.08639e-52
Acinar	ENSG00000242732	ENSSSCG00000020876	RTL5	RTL5	3.9297	3.71827	240.469	3.10745e-54	1.09392e-52
Acinar	ENSG00000100036	ENSSSCG00000010012	SLC35E4	SLC35E4	3.09631	2.04884	240.389	3.23559e-54	1.13721e-52
Acinar	ENSG00000186577	ENSSSCG00000023160	SMIM29	ENSSSCG00000023160	2.41178	3.19198	239.983	3.96584e-54	1.39165e-52
Acinar	ENSG00000166920	ENSSSCG00000004670	C15orf48	C15orf48	4.64705	6.74007	239.547	4.93797e-54	1.73002e-52
Acinar	ENSG00000154654	ENSSSCG00000012020	NCAM2	NCAM2	5.2718	0.602826	239.284	5.63273e-54	1.97029e-52
Acinar	ENSG00000166448	ENSSSCG00000007605	TMEM130	TMEM130	4.70102	3.51759	239.073	6.26532e-54	2.18809e-52
Acinar	ENSG00000156298	ENSSSCG00000012238	TSPAN7	ENSSSCG00000012238	2.68877	6.28023	238.748	7.37519e-54	2.56755e-52
Acinar	ENSG00000143344	ENSSSCG00000015563	RGL1	RGL1	4.18112	1.50195	238.346	9.02209e-54	3.13592e-52
Acinar	ENSG00000113583	ENSSSCG00000032323	C5orf15	C5orf15	1.97384	5.52559	237.97	1.08992e-53	3.78241e-52
Acinar	ENSG00000175535	ENSSSCG00000010658	PNLIP	PNLIP	-6.59832	-0.265445	237.613	1.30341e-53	4.50905e-52
Acinar	ENSG00000151640	ENSSSCG00000010762	DPYSL4	DPYSL4	4.19536	1.73075	237.515	1.36983e-53	4.72398e-52
Acinar	ENSG00000177511	ENSSSCG00000038971	ST8SIA3	ST8SIA3	4.7333	2.49483	237.318	1.51174e-53	5.20522e-52
Acinar	ENSG00000186051	ENSSSCG00000037867	TAL2	TAL2	-5.29495	3.63664	237.249	1.56479e-53	5.37946e-52
Acinar	ENSG00000126259	ENSSSCG00000002915	KIRREL2	KIRREL2	-5.42301	3.42293	237.126	1.66462e-53	5.71373e-52
Acinar	ENSG00000147223	ENSSSCG00000033276	RIPPLY1	RIPPLY1	-5.53931	-0.0646834	237.026	1.75034e-53	5.99861e-52
Acinar	ENSG00000074370	ENSSSCG00000017874	ATP2A3	ATP2A3	2.89593	3.35318	236.871	1.89261e-53	6.47609e-52
Acinar	ENSG00000160991	ENSSSCG00000023912	ORAI2	ORAI2	2.42122	2.6598	236.748	2.01318e-53	6.87795e-52
Acinar	ENSG00000126218	ENSSSCG00000009558	F10	F10	3.94279	2.15946	236.741	2.02009e-53	6.89084e-52
Acinar	ENSG00000142149	ENSSSCG00000029392	HUNK	HUNK	3.24244	3.10847	236.478	2.30555e-53	7.85242e-52
Acinar	ENSG00000188659	ENSSSCG00000031963	SAXO2	SAXO2	2.45555	2.99699	236.389	2.41044e-53	8.19698e-52
Acinar	ENSG00000155592	ENSSSCG00000007823	ZKSCAN2	ZKSCAN2	-2.37098	4.3797	236.37	2.43356e-53	8.26283e-52
Acinar	ENSG00000197457	ENSSSCG00000038405	STMN3	STMN3	4.19753	6.25709	235.699	3.40799e-53	1.15358e-51
Acinar	ENSG00000166710	ENSSSCG00000004687	B2M	B2M	2.73032	6.58995	235.686	3.43127e-53	1.15967e-51
Acinar	ENSG00000199094	ENSSSCG00000019520	MIR30C2	ssc-mir-30c-2	3.12062	2.50257	235.65	3.49407e-53	1.17909e-51
Acinar	ENSG00000149485	ENSSSCG00000024015	FADS1	FADS1	2.21987	3.58189	235.628	3.53224e-53	1.19014e-51
Acinar	ENSG00000053372	ENSSSCG00000034814	MRTO4	MRTO4	-1.95859	6.03717	235.538	3.69575e-53	1.24333e-51
Acinar	ENSG00000157978	ENSSSCG00000003549	LDLRAP1	LDLRAP1	-3.14427	3.61758	235.469	3.82648e-53	1.28535e-51
Acinar	ENSG00000134824	ENSSSCG00000013072	FADS2	FADS2	3.22629	3.02394	235.302	4.16127e-53	1.39567e-51
Acinar	ENSG00000101333	ENSSSCG00000007058	PLCB4	PLCB4	2.91598	3.69812	234.284	6.93565e-53	2.31912e-51
Acinar	ENSG00000113396	ENSSSCG00000014257	SLC27A6	SLC27A6	6.0613	0.385606	234.026	7.89565e-53	2.62814e-51
Acinar	ENSG00000142303	ENSSSCG00000026994	ADAMTS10	ADAMTS10	-2.12585	3.91327	233.915	8.34876e-53	2.77476e-51
Acinar	ENSG00000214706	ENSSSCG00000011402	IFRD2	IFRD2	-1.72422	5.02473	233.712	9.24551e-53	3.06355e-51
Acinar	ENSG00000141298	ENSSSCG00000017791	SSH2	ENSSSCG00000017791	-1.69999	3.56466	233.428	1.06616e-52	3.52748e-51
Acinar	ENSG00000175294	ENSSSCG00000012959	CATSPER1	CATSPER1	3.6541	2.05436	233.373	1.09576e-52	3.61995e-51
Acinar	ENSG00000187535	ENSSSCG00000008020	IFT140	IFT140	2.46457	2.37946	233.297	1.13876e-52	3.75639e-51
Acinar	ENSG00000153789	ENSSSCG00000002668	CIBAR2	CIBAR2	4.84155	2.11704	232.785	1.47262e-52	4.84314e-51
Acinar	ENSG00000127955	ENSSSCG00000015407	GNAI1	GNAI1	3.0569	5.02552	232.705	1.53293e-52	5.03396e-51
Acinar	ENSG00000148291	ENSSSCG00000038459	SURF2	SURF2	-2.32279	5.68727	232.586	1.62727e-52	5.33579e-51
Acinar	ENSG00000138760	ENSSSCG00000008980	SCARB2	SCARB2	2.34004	5.31347	232.012	2.17045e-52	7.10629e-51
Acinar	ENSG00000187624	ENSSSCG00000017814	C17orf97	ENSSSCG00000017814	3.8044	2.17645	231.882	2.31709e-52	7.57512e-51
Acinar	ENSG00000168398	ENSSSCG00000027030	BDKRB2	BDKRB2	5.28799	1.03076	231.61	2.65571e-52	8.65642e-51
Acinar	ENSG00000162814	ENSSSCG00000029778	SPATA17	SPATA17	3.39064	3.07417	231.36	3.01179e-52	9.78808e-51
Acinar	ENSG00000185519	ENSSSCG00000003470	FAM131C	FAM131C	-1.58432	6.05969	229.77	6.6895e-52	2.16763e-50
Acinar	ENSG00000111450	ENSSSCG00000009747	STX2	STX2	2.48509	3.24332	229.001	9.84553e-52	3.18093e-50
Acinar	ENSG00000218336	ENSSSCG00000015774	TENM3	TENM3	1.7788	4.51469	228.45	1.29815e-51	4.18798e-50
Acinar	ENSG00000128268	ENSSSCG00000038126	MGAT3	MGAT3	4.50542	1.68528	228.335	1.37528e-51	4.43029e-50
Acinar	ENSG00000172023	ENSSSCG00000031177	REG1B	ENSSSCG00000031177	-6.27429	9.1285	228.098	1.54941e-51	4.98392e-50
Acinar	ENSG00000115263	ENSSSCG00000015895	GCG	GCG	4.98638	12.2733	227.906	1.70634e-51	5.48073e-50
Acinar	ENSG00000112902	ENSSSCG00000017095	SEMA5A	SEMA5A	3.08118	4.62712	227.358	2.24696e-51	7.20665e-50
Acinar	ENSG00000105810	ENSSSCG00000040183	CDK6	CDK6	1.56078	5.98349	227.243	2.38027e-51	7.62309e-50
Acinar	ENSG00000140836	ENSSSCG00000002752	ZFHX3	ZFHX3	-1.52436	6.69014	226.788	2.99062e-51	9.56389e-50
Acinar	ENSG00000116791	ENSSSCG00000003780	CRYZ	CRYZ	-2.33263	7.88915	226.772	3.01488e-51	9.62748e-50
Acinar	ENSG00000211997	ENSSSCG00000019199	MIR708	ssc-mir-708	5.86885	0.463927	226.606	3.27767e-51	1.04515e-49
Acinar	ENSG00000129538	ENSSSCG00000031649	RNASE1	RNASE1	-5.29589	7.27203	226.064	4.30195e-51	1.36779e-49
Acinar	ENSG00000163590	ENSSSCG00000023434	PPM1L	PPM1L	-2.13172	4.88324	224.898	7.7282e-51	2.45362e-49
Acinar	ENSG00000165495	ENSSSCG00000015211	PKNOX2	PKNOX2	-1.78014	3.07999	224.786	8.17316e-51	2.59115e-49
Acinar	ENSG00000107611	ENSSSCG00000011030	CUBN	CUBN	-3.11257	1.97985	224.376	1.00464e-50	3.18045e-49
Acinar	ENSG00000100242	ENSSSCG00000000094	SUN2	SUN2	-1.45699	5.35402	224.194	1.1006e-50	3.47924e-49
Acinar	ENSG00000175274	ENSSSCG00000031819	TP53I11	TP53I11	2.7616	1.90156	224.118	1.14311e-50	3.60842e-49
Acinar	ENSG00000198183	ENSSSCG00000007260	BPIFA1	BPIFA1	4.42165	0.564804	223.978	1.22633e-50	3.86559e-49
Acinar	ENSG00000198183	ENSSSCG00000007260	BPIFA1	BPIFA1	4.42165	0.564804	223.978	1.22633e-50	3.86559e-49
Acinar	ENSG00000009413	ENSSSCG00000025703	REV3L	REV3L	1.56591	5.61038	223.681	1.42365e-50	4.47474e-49
Acinar	ENSG00000141098	ENSSSCG00000024750	GFOD2	GFOD2	1.97443	3.06508	223.634	1.45783e-50	4.57563e-49
Acinar	ENSG00000151458	ENSSSCG00000022173	ANKRD50	ANKRD50	-2.2398	4.04946	222.999	2.00544e-50	6.2765e-49
Acinar	ENSG00000207304	ENSSSCG00000019451	SNORA8	SNORA8	-1.83817	5.58341	222.982	2.02281e-50	6.32185e-49
Acinar	ENSG00000157388	ENSSSCG00000011455	CACNA1D	CACNA1D	3.3092	4.98548	222.681	2.35304e-50	7.34349e-49
Acinar	ENSG00000187955	ENSSSCG00000005997	COL14A1	COL14A1	-2.17469	2.72026	222.565	2.4942e-50	7.77299e-49
Acinar	ENSG00000162458	ENSSSCG00000003465	FBLIM1	FBLIM1	2.10033	3.60696	222.542	2.52243e-50	7.84987e-49
Acinar	ENSG00000119950	ENSSSCG00000022128	MXI1	ENSSSCG00000022128	-1.59547	5.42971	222.092	3.16328e-50	9.83028e-49
Acinar	ENSG00000137563	ENSSSCG00000037637	GGH	GGH	1.79586	6.61816	221.92	3.44868e-50	1.07021e-48
Acinar	ENSG00000276023	ENSSSCG00000029874	DUSP14	DUSP14	3.06918	3.6988	221.879	3.52001e-50	1.09081e-48
Acinar	ENSG00000118420	ENSSSCG00000026346	UBE3D	UBE3D	-2.08462	3.44903	221.816	3.63341e-50	1.12436e-48
Acinar	ENSG00000163053	ENSSSCG00000016260	SLC16A14	SLC16A14	3.19353	2.43038	221.683	3.88369e-50	1.20013e-48
Acinar	ENSG00000154277	ENSSSCG00000022945	UCHL1	UCHL1	3.91425	6.27912	221.639	3.96997e-50	1.22507e-48
Acinar	ENSG00000106927	ENSSSCG00000005485	AMBP	AMBP	-3.67605	8.40954	221.355	4.57934e-50	1.40719e-48
Acinar	ENSG00000137767	ENSSSCG00000004666	SQOR	SQOR	-3.89322	3.54	221.318	4.66582e-50	1.43176e-48
Acinar	ENSG00000128606	ENSSSCG00000036452	LRRC17	LRRC17	-3.30548	1.59603	221.242	4.84613e-50	1.48502e-48
Acinar	ENSG00000182253	ENSSSCG00000035223	SYNM	ENSSSCG00000035223	2.25963	5.44561	221.024	5.4072e-50	1.65465e-48
Acinar	ENSG00000119138	ENSSSCG00000021646	KLF9	KLF9	-2.96119	3.19294	220.821	5.98697e-50	1.82952e-48
Acinar	ENSG00000247596	ENSSSCG00000011435	TWF2	TWF2	1.59689	4.72168	220.759	6.17755e-50	1.88514e-48
Acinar	ENSG00000160191	ENSSSCG00000030016	PDE9A	PDE9A	3.01515	3.52668	220.414	7.3456e-50	2.23847e-48
Acinar	ENSG00000160293	ENSSSCG00000005743	VAV2	VAV2	-2.15847	4.16422	220.333	7.65288e-50	2.32889e-48
Acinar	ENSG00000177272	ENSSSCG00000006802	KCNA3	KCNA3	4.24032	2.22992	220.301	7.77539e-50	2.3608e-48
Acinar	ENSG00000134287	ENSSSCG00000031381	ARF3	ENSSSCG00000031381	-3.08667	8.73732	220.3	7.77919e-50	2.3608e-48
Acinar	ENSG00000140263	ENSSSCG00000004679	SORD	SORD	-2.2577	6.35343	220.227	8.0699e-50	2.44565e-48
Acinar	ENSG00000200913	ENSSSCG00000018197	SNORD46	ENSSSCG00000018197	-1.91815	7.5258	220.18	8.26293e-50	2.5007e-48
Acinar	ENSG00000175899	ENSSSCG00000000660	A2M	A2M	4.22928	3.19593	219.811	9.94614e-50	3.00185e-48
Acinar	ENSG00000096093	ENSSSCG00000002620	EFHC1	EFHC1	2.66569	2.91386	219.784	1.00815e-49	3.03855e-48
Acinar	ENSG00000157985	ENSSSCG00000016317	AGAP1	AGAP1	-1.82988	5.70373	219.69	1.05705e-49	3.18157e-48
Acinar	ENSG00000166206	ENSSSCG00000038547	GABRB3	GABRB3	4.91376	1.99403	219.586	1.11343e-49	3.34667e-48
Acinar	ENSG00000183783	ENSSSCG00000035712	KCTD8	KCTD8	4.09743	0.941176	219.469	1.18083e-49	3.54442e-48
Acinar	ENSG00000137962	ENSSSCG00000006889	ARHGAP29	ARHGAP29	2.754	3.40635	219.31	1.27921e-49	3.82928e-48
Acinar	ENSG00000115339	ENSSSCG00000015907	GALNT3	GALNT3	2.82098	3.41265	219.105	1.41784e-49	4.23849e-48
Acinar	ENSG00000136279	ENSSSCG00000016721	DBNL	DBNL	-1.38472	5.69767	218.846	1.61504e-49	4.82145e-48
Acinar	ENSG00000079819	ENSSSCG00000004199	EPB41L2	EPB41L2	3.32713	3.10742	218.745	1.69895e-49	5.06507e-48
Acinar	ENSG00000163909	ENSSSCG00000038956	HEYL	HEYL	-3.49291	2.10898	218.69	1.74623e-49	5.19899e-48
Acinar	ENSG00000086712	ENSSSCG00000040713	TXLNG	TXLNG	-1.44168	4.42333	218.655	1.77738e-49	5.28457e-48
Acinar	ENSG00000095209	ENSSSCG00000039896	TMEM38B	TMEM38B	-1.53053	5.48218	218.435	1.9845e-49	5.89243e-48
Acinar	ENSG00000077420	ENSSSCG00000030156	APBB1IP	APBB1IP	4.27005	1.06187	217.859	2.65152e-49	7.85178e-48
Acinar	ENSG00000137691	ENSSSCG00000014980	CFAP300	CFAP300	4.48558	2.37969	217.846	2.66812e-49	7.89031e-48
Acinar	ENSG00000174721	ENSSSCG00000010466	FGFBP3	FGFBP3	3.90483	1.7177	217.788	2.74701e-49	8.11272e-48
Acinar	ENSG00000185352	ENSSSCG00000009503	HS6ST3	HS6ST3	4.31567	0.918619	217.663	2.92585e-49	8.62929e-48
Acinar	ENSG00000089012	ENSSSCG00000028461	SIRPG	ENSSSCG00000028461	1.49627	3.87373	217.32	3.47524e-49	1.02352e-47
Acinar	ENSG00000101307	ENSSSCG00000028461	SIRPB1	ENSSSCG00000028461	1.49627	3.87373	217.32	3.47524e-49	1.02352e-47
Acinar	ENSG00000198053	ENSSSCG00000028461	SIRPA	ENSSSCG00000028461	1.49627	3.87373	217.32	3.47524e-49	1.02352e-47
Acinar	ENSG00000204442	ENSSSCG00000040130	NALF1	FAM155A	3.77524	2.86183	217.317	3.47964e-49	1.02352e-47
Acinar	ENSG00000198218	ENSSSCG00000011373	QRICH1	QRICH1	-1.64007	7.37216	217.272	3.55954e-49	1.04461e-47
Acinar	ENSG00000150656	ENSSSCG00000004869	CNDP1	CNDP1	3.39817	1.38926	217.262	3.57854e-49	1.0484e-47
Acinar	ENSG00000284308	ENSSSCG00000023156	C2orf81	ENSSSCG00000023156	4.63313	1.34507	217.254	3.59184e-49	1.0509e-47
Acinar	ENSG00000174939	ENSSSCG00000040342	ASPHD1	ENSSSCG00000040342	5.24982	1.62804	216.845	4.41063e-49	1.28704e-47
Acinar	ENSG00000196132	ENSSSCG00000039212	MYT1	MYT1	4.29878	2.26824	216.759	4.60572e-49	1.34041e-47
Acinar	ENSG00000148180	ENSSSCG00000037508	GSN	GSN	2.19165	5.74649	216.521	5.19076e-49	1.50868e-47
Acinar	ENSG00000170153	ENSSSCG00000009053	RNF150	RNF150	3.57352	2.46396	216.499	5.24803e-49	1.52331e-47
Acinar	ENSG00000114670	ENSSSCG00000011181	NEK11	NEK11	3.04986	1.56308	216.446	5.39138e-49	1.56286e-47
Acinar	ENSG00000200530	ENSSSCG00000024521	SNORD35B	SNORD35B	-2.0511	6.82858	216.361	5.62492e-49	1.62841e-47
Acinar	ENSG00000131781	ENSSSCG00000006702	FMO5	FMO5	2.40836	3.32855	216.299	5.80452e-49	1.6782e-47
Acinar	ENSG00000102109	ENSSSCG00000021328	PCSK1N	PCSK1N	2.85787	8.03777	216.286	5.84052e-49	1.68639e-47
Acinar	ENSG00000213316	ENSSSCG00000028488	LTC4S	LTC4S	-5.52028	8.80009	216.097	6.42237e-49	1.85196e-47
Acinar	ENSG00000170802	ENSSSCG00000029593	FOXN2	FOXN2	-2.47707	3.34022	215.976	6.82659e-49	1.96595e-47
Acinar	ENSG00000161992	ENSSSCG00000007989	PRR35	PRR35	-4.78768	5.06833	215.957	6.88959e-49	1.9815e-47
Acinar	ENSG00000156427	ENSSSCG00000016997	FGF18	FGF18	-5.76035	-0.43034	215.82	7.38136e-49	2.12017e-47
Acinar	ENSG00000176396	ENSSSCG00000024773	EID2	EID2	2.95432	2.07105	215.392	9.15339e-49	2.62572e-47
Acinar	ENSG00000204301	ENSSSCG00000001440	NOTCH4	NOTCH4	3.07061	2.2973	215.174	1.02125e-48	2.92192e-47
Acinar	ENSG00000110328	ENSSSCG00000013403	GALNT18	GALNT18	4.00425	2.19597	215.071	1.0756e-48	3.07343e-47
Acinar	ENSG00000005001	ENSSSCG00000035594	PRSS22	PRSS22	2.05653	3.99809	215.057	1.08324e-48	3.08722e-47
Acinar	ENSG00000139117	ENSSSCG00000000778	CPNE8	CPNE8	-2.98859	2.60806	214.807	1.22764e-48	3.49424e-47
Acinar	ENSG00000142279	ENSSSCG00000039166	WTIP	WTIP	3.0164	1.74843	214.695	1.29909e-48	3.68808e-47
Acinar	ENSG00000222009	ENSSSCG00000003926	BTBD19	BTBD19	2.32934	3.85265	214.64	1.33533e-48	3.78608e-47
Acinar	ENSG00000008394	ENSSSCG00000032580	MGST1	MGST1	1.73195	5.68559	214.55	1.39678e-48	3.9552e-47
Acinar	ENSG00000073711	ENSSSCG00000033185	PPP2R3A	PPP2R3A	1.37657	4.93678	214.132	1.7232e-48	4.86698e-47
Acinar	ENSG00000135272	ENSSSCG00000021885	MDFIC	MDFIC	3.37942	3.61201	214.01	1.83249e-48	5.16903e-47
Acinar	ENSG00000204305	ENSSSCG00000001437	AGER	AGER	-3.62951	2.47648	213.748	2.08976e-48	5.88719e-47
Acinar	ENSG00000164266	ENSSSCG00000034511	SPINK1	SPINK1	-5.02611	10.786	213.734	2.10448e-48	5.92108e-47
Acinar	ENSG00000117152	ENSSSCG00000006335	RGS4	RGS4	4.06224	5.50711	213.608	2.24244e-48	6.30116e-47
Acinar	ENSG00000159640	ENSSSCG00000017296	ACE	ACE	4.18292	1.40347	213.469	2.40516e-48	6.7498e-47
Acinar	ENSG00000164161	ENSSSCG00000009045	HHIP	HHIP	-4.82694	6.47515	213.449	2.42899e-48	6.80798e-47
Acinar	ENSG00000116039	ENSSSCG00000008314	ATP6V1B1	ATP6V1B1	4.4673	1.26112	213.132	2.84888e-48	7.97469e-47
Acinar	ENSG00000183386	ENSSSCG00000003644	FHL3	FHL3	-1.97711	4.04187	213.121	2.86447e-48	8.00814e-47
Acinar	ENSG00000135144	ENSSSCG00000009873	DTX1	DTX1	4.90348	1.31527	212.98	3.07356e-48	8.58179e-47
Acinar	ENSG00000001617	ENSSSCG00000011398	SEMA3F	SEMA3F	-2.73111	2.60071	212.798	3.36837e-48	9.39301e-47
Acinar	ENSG00000145358	ENSSSCG00000025240	DDIT4L	DDIT4L	-3.77679	2.62322	212.762	3.42994e-48	9.5526e-47
Acinar	ENSG00000121900	ENSSSCG00000026455	TMEM54	TMEM54	2.80821	3.06734	212.724	3.49648e-48	9.7256e-47
Acinar	ENSG00000187720	ENSSSCG00000004980	THSD4	THSD4	4.14135	1.2152	212.6	3.72036e-48	1.03353e-46
Acinar	ENSG00000008118	ENSSSCG00000015619	CAMK1G	CAMK1G	2.62471	2.66504	212.481	3.95063e-48	1.09611e-46
Acinar	ENSG00000009724	ENSSSCG00000003410	MASP2	MASP2	-2.89306	3.92599	212.475	3.96149e-48	1.09774e-46
Acinar	ENSG00000092964	ENSSSCG00000030130	DPYSL2	DPYSL2	3.46439	3.88493	212.273	4.38484e-48	1.21048e-46
Acinar	ENSG00000166313	ENSSSCG00000014628	APBB1	APBB1	1.69758	4.09033	212.055	4.89347e-48	1.3492e-46
Acinar	ENSG00000165271	ENSSSCG00000010990	NOL6	NOL6	-1.47847	3.32272	212.043	4.92242e-48	1.35548e-46
Acinar	ENSG00000170085	ENSSSCG00000014062	SIMC1	SIMC1	-1.85002	3.23468	211.449	6.63187e-48	1.82393e-46
Acinar	ENSG00000135916	ENSSSCG00000016267	ITM2C	ITM2C	2.30655	5.72007	211.324	7.06172e-48	1.93731e-46
Acinar	ENSG00000113966	ENSSSCG00000027278	ARL6	ARL6	1.76403	4.31365	210.887	8.79738e-48	2.41046e-46
Acinar	ENSG00000138798	ENSSSCG00000009134	EGF	EGF	-5.3852	5.66853	210.702	9.65312e-48	2.64164e-46
Acinar	ENSG00000125510	ENSSSCG00000031228	OPRL1	OPRL1	-3.81477	0.892735	210.618	1.00701e-47	2.75232e-46
Acinar	ENSG00000178445	ENSSSCG00000005199	GLDC	GLDC	-2.75961	3.26628	210.285	1.19029e-47	3.24923e-46
Acinar	ENSG00000168575	ENSSSCG00000007027	SLC20A2	SLC20A2	-1.69662	4.26047	209.999	1.37432e-47	3.74693e-46
Acinar	ENSG00000124493	ENSSSCG00000001523	GRM4	GRM4	3.31887	3.64934	209.981	1.387e-47	3.77684e-46
Acinar	ENSG00000106263	ENSSSCG00000039390	EIF3B	EIF3B	-1.3244	4.85905	209.97	1.39447e-47	3.79247e-46
Acinar	ENSG00000205929	ENSSSCG00000012038	C21orf62	C21orf62	3.29308	2.99866	209.812	1.50954e-47	4.10035e-46
Acinar	ENSG00000115652	ENSSSCG00000008143	UXS1	UXS1	-1.9026	5.73233	209.783	1.5319e-47	4.15596e-46
Acinar	ENSG00000139970	ENSSSCG00000025013	RTN1	RTN1	3.79231	2.17294	209.442	1.8182e-47	4.92056e-46
Acinar	ENSG00000136378	ENSSSCG00000001765	ADAMTS7	ADAMTS7	3.70902	1.67924	209.311	1.94129e-47	5.24722e-46
Acinar	ENSG00000116675	ENSSSCG00000003807	DNAJC6	DNAJC6	3.71322	3.14306	208.98	2.29246e-47	6.18879e-46
Acinar	ENSG00000168497	ENSSSCG00000026618	CAVIN2	CAVIN2	-3.55861	3.0665	208.635	2.72758e-47	7.35445e-46
Acinar	ENSG00000108018	ENSSSCG00000030026	SORCS1	SORCS1	5.20978	1.88336	208.519	2.89109e-47	7.78577e-46
Acinar	ENSG00000123427	ENSSSCG00000037619	EEF1AKMT3	EEF1AKMT3	-1.56845	3.51905	208.298	3.23039e-47	8.68888e-46
Acinar	ENSG00000105048	ENSSSCG00000025353	TNNT1	TNNT1	-2.87599	5.32924	208.096	3.57539e-47	9.60511e-46
Acinar	ENSG00000151466	ENSSSCG00000029943	SCLT1	SCLT1	-1.73197	4.73927	207.935	3.87668e-47	1.04018e-45
Acinar	ENSG00000101938	ENSSSCG00000012576	CHRDL1	CHRDL1	-5.39361	3.79381	207.701	4.3604e-47	1.16712e-45
Acinar	ENSG00000173598	ENSSSCG00000040056	NUDT4	ENSSSCG00000040056	1.76422	6.08175	207.688	4.38756e-47	1.17297e-45
Acinar	ENSG00000177144	ENSSSCG00000040056	NUDT4B	ENSSSCG00000040056	1.76422	6.08175	207.688	4.38756e-47	1.17297e-45
Acinar	ENSG00000153130	ENSSSCG00000038550	SCOC	SCOC	2.26792	6.35809	207.656	4.45958e-47	1.19077e-45
Acinar	ENSG00000158445	ENSSSCG00000007462	KCNB1	KCNB1	4.41602	1.63665	207.596	4.59562e-47	1.22561e-45
Acinar	ENSG00000101445	ENSSSCG00000007350	PPP1R16B	PPP1R16B	-2.28491	2.23487	207.563	4.67159e-47	1.24436e-45
Acinar	ENSG00000145247	ENSSSCG00000008829	OCIAD2	OCIAD2	2.29808	4.33958	207.436	4.98174e-47	1.32537e-45
Acinar	ENSG00000171105	ENSSSCG00000013566	INSR	INSR	-1.30645	5.23511	207.378	5.12873e-47	1.36283e-45
Acinar	ENSG00000011347	ENSSSCG00000021906	SYT7	SYT7	4.03803	3.60333	207.177	5.67139e-47	1.50521e-45
Acinar	ENSG00000179023	ENSSSCG00000023732	KLHDC7A	KLHDC7A	3.54491	3.44612	207.127	5.81553e-47	1.53975e-45
Acinar	ENSG00000186973	ENSSSCG00000003954	FAM183A	FAM183A	5.66352	1.31517	207.029	6.11018e-47	1.61582e-45
Acinar	ENSG00000276231	ENSSSCG00000017990	PIK3R6	PIK3R6	2.01989	2.47212	206.864	6.63888e-47	1.75353e-45
Acinar	ENSG00000126456	ENSSSCG00000003178	IRF3	IRF3	1.67697	4.67842	206.712	7.16659e-47	1.89064e-45
Acinar	ENSG00000162998	ENSSSCG00000016018	FRZB	FRZB	4.74339	2.80085	206.681	7.27805e-47	1.91774e-45
Acinar	ENSG00000151474	ENSSSCG00000011056	FRMD4A	FRMD4A	2.92467	4.10202	206.648	7.39945e-47	1.9474e-45
Acinar	ENSG00000170477	ENSSSCG00000024610	KRT4	KRT4	4.65204	1.25611	206.635	7.44844e-47	1.95795e-45
Acinar	ENSG00000136158	ENSSSCG00000009482	SPRY2	SPRY2	4.30346	1.75056	206.559	7.73962e-47	2.03207e-45
Acinar	ENSG00000164659	ENSSSCG00000015394	ELAPOR2	ELAPOR2	3.73317	1.7218	206.546	7.7887e-47	2.04252e-45
Acinar	ENSG00000064490	ENSSSCG00000036310	RFXANK	RFXANK	-2.55857	6.7256	206.513	7.91872e-47	2.07414e-45
Acinar	ENSG00000165169	ENSSSCG00000028908	DYNLT3	DYNLT3	1.67775	4.86641	206.412	8.33199e-47	2.17979e-45
Acinar	ENSG00000182132	ENSSSCG00000017003	KCNIP1	KCNIP1	4.61165	1.53134	206.227	9.14367e-47	2.3893e-45
Acinar	ENSG00000146070	ENSSSCG00000001723	PLA2G7	PLA2G7	3.80386	2.07264	206.135	9.57568e-47	2.49922e-45
Acinar	ENSG00000107954	ENSSSCG00000010603	NEURL1	NEURL1	3.23905	5.26863	205.967	1.04158e-46	2.71528e-45
Acinar	ENSG00000147408	ENSSSCG00000035371	CSGALNACT1	ENSSSCG00000035371	-2.47437	2.08421	205.928	1.06225e-46	2.76586e-45
Acinar	ENSG00000144619	ENSSSCG00000011527	CNTN4	CNTN4	4.42511	1.78685	205.766	1.15227e-46	2.99672e-45
Acinar	ENSG00000182718	ENSSSCG00000004578	ANXA2	ANXA2	4.04261	7.68964	205.657	1.21711e-46	3.16162e-45
Acinar	ENSG00000099337	ENSSSCG00000038902	KCNK6	KCNK6	-2.81502	2.50333	205.636	1.23057e-46	3.1928e-45
Acinar	ENSG00000142677	ENSSSCG00000038848	IL22RA1	IL22RA1	-4.96174	4.26605	205.398	1.38663e-46	3.59349e-45
Acinar	ENSG00000267200	ENSSSCG00000045876	MIR132	ENSSSCG00000045876	3.70659	2.17431	205.376	1.40219e-46	3.62953e-45
Acinar	ENSG00000154330	ENSSSCG00000005243	PGM5	PGM5	4.08432	3.23384	205.092	1.61678e-46	4.18006e-45
Acinar	ENSG00000180535	ENSSSCG00000038489	BHLHA15	BHLHA15	-3.76691	4.26212	204.834	1.84116e-46	4.75461e-45
Acinar	ENSG00000175175	ENSSSCG00000038932	PPM1E	PPM1E	3.64444	3.28447	203.551	3.50783e-46	9.03738e-45
Acinar	ENSG00000150672	ENSSSCG00000014904	DLG2	DLG2	-1.84414	3.19205	203.469	3.65528e-46	9.39526e-45
Acinar	ENSG00000157168	ENSSSCG00000015839	NRG1	NRG1	-2.35408	3.36895	203.297	3.98554e-46	1.02203e-44
Acinar	ENSG00000143878	ENSSSCG00000043781	RHOB	RHOB	1.73118	6.94592	203.292	3.99445e-46	1.02312e-44
Acinar	ENSG00000228696	ENSSSCG00000031893	ARL17B	ENSSSCG00000031893	1.88185	2.94034	203.242	4.0968e-46	1.04811e-44
Acinar	ENSG00000185829	ENSSSCG00000031893	ARL17A	ENSSSCG00000031893	1.88185	2.94034	203.242	4.0968e-46	1.04811e-44
Acinar	ENSG00000165025	ENSSSCG00000009589	SYK	SYK	-2.56007	4.04681	202.569	5.74411e-46	1.46275e-44
Acinar	ENSG00000109534	ENSSSCG00000009137	GAR1	GAR1	-1.45868	5.03134	202.277	6.65126e-46	1.6918e-44
Acinar	ENSG00000211899	ENSSSCG00000037775	IGHM	ENSSSCG00000037775	-5.62984	6.65221	202.251	6.73832e-46	1.71197e-44
Acinar	ENSG00000174946	ENSSSCG00000036844	GPR171	GPR171	3.9999	1.99559	202.219	6.85025e-46	1.7384e-44
Acinar	ENSG00000136710	ENSSSCG00000035628	CCDC115	CCDC115	2.06296	6.21514	202.181	6.98077e-46	1.76948e-44
Acinar	ENSG00000198626	ENSSSCG00000010142	RYR2	RYR2	4.083	2.26179	202.125	7.18129e-46	1.81821e-44
Acinar	ENSG00000105559	ENSSSCG00000003137	PLEKHA4	PLEKHA4	-2.93307	3.3158	202.096	7.2838e-46	1.84205e-44
Acinar	ENSG00000124780	ENSSSCG00000001592	KCNK17	KCNK17	3.97303	2.44072	202.06	7.41925e-46	1.87415e-44
Acinar	ENSG00000139209	ENSSSCG00000026597	SLC38A4	SLC38A4	4.00601	3.41534	201.96	7.80242e-46	1.96868e-44
Acinar	ENSG00000170927	ENSSSCG00000001746	PKHD1	PKHD1	3.05948	4.15628	201.807	8.42449e-46	2.1232e-44
Acinar	ENSG00000115159	ENSSSCG00000015872	GPD2	GPD2	2.6044	4.01135	201.6	9.34846e-46	2.35337e-44
Acinar	ENSG00000157404	ENSSSCG00000008842	KIT	KIT	3.62051	5.43084	201.504	9.81128e-46	2.46706e-44
Acinar	ENSG00000139874	ENSSSCG00000001938	SSTR1	SSTR1	-2.67079	3.49103	201.28	1.09772e-45	2.75081e-44
Acinar	ENSG00000124159	ENSSSCG00000007391	MATN4	MATN4	-4.78769	4.54658	200.965	1.28625e-45	3.2095e-44
Acinar	ENSG00000185615	ENSSSCG00000007983	PDIA2	PDIA2	-5.72628	7.80669	200.811	1.38971e-45	3.46279e-44
Acinar	ENSG00000157542	ENSSSCG00000012065	KCNJ6	KCNJ6	4.57352	1.67168	200.697	1.47119e-45	3.66168e-44
Acinar	ENSG00000198840	ENSSSCG00000018084	MT-ND3	ND3	-1.72829	10.4245	200.659	1.50014e-45	3.7295e-44
Acinar	ENSG00000185633	ENSSSCG00000027621	NDUFA4L2	NDUFA4L2	3.8692	1.93151	200.015	2.07327e-45	5.14854e-44
Acinar	ENSG00000130005	ENSSSCG00000023142	GAMT	GAMT	-1.93411	6.97624	199.47	2.72603e-45	6.76191e-44
Acinar	ENSG00000196353	ENSSSCG00000011178	CPNE4	CPNE4	4.17237	2.4175	199.422	2.79283e-45	6.9198e-44
Acinar	ENSG00000140104	ENSSSCG00000040365	CLBA1	CLBA1	2.15354	2.53763	199.155	3.19346e-45	7.89467e-44
Acinar	ENSG00000151882	ENSSSCG00000016871	CCL28	CCL28	4.75499	1.32065	199.031	3.39777e-45	8.39032e-44
Acinar	ENSG00000175513	ENSSSCG00000012964	TSGA10IP	TSGA10IP	-4.2676	0.991255	198.984	3.47928e-45	8.58196e-44
Acinar	ENSG00000152128	ENSSSCG00000015700	TMEM163	TMEM163	2.54269	3.12879	198.874	3.67729e-45	9.06022e-44
Acinar	ENSG00000089177	ENSSSCG00000007080	KIF16B	ENSSSCG00000007080	-1.53259	4.22141	198.862	3.70068e-45	9.10765e-44
Acinar	ENSG00000153208	ENSSSCG00000008103	MERTK	MERTK	-3.13523	2.44633	198.824	3.77166e-45	9.27196e-44
Acinar	ENSG00000165807	ENSSSCG00000002275	PPP1R36	PPP1R36	3.47429	1.5626	198.783	3.8496e-45	9.453e-44
Acinar	ENSG00000197448	ENSSSCG00000035615	GSTK1	GSTK1	-1.58471	6.60869	198.637	4.14301e-45	1.01622e-43
Acinar	ENSG00000151012	ENSSSCG00000022649	SLC7A11	SLC7A11	-3.69919	2.57574	197.884	6.04832e-45	1.48191e-43
Acinar	ENSG00000145779	ENSSSCG00000040617	TNFAIP8	TNFAIP8	-1.9798	3.83193	197.809	6.28115e-45	1.53724e-43
Acinar	ENSG00000184524	ENSSSCG00000012845	CEND1	CEND1	3.59066	0.951073	197.513	7.28875e-45	1.78186e-43
Acinar	ENSG00000086696	ENSSSCG00000038221	HSD17B2	HSD17B2	-2.71742	5.3668	197.443	7.54761e-45	1.84309e-43
Acinar	ENSG00000118965	ENSSSCG00000008604	WDR35	WDR35	1.58777	4.05137	197.143	8.77462e-45	2.14035e-43
Acinar	ENSG00000180543	ENSSSCG00000033112	TSPYL5	TSPYL5	2.38717	3.36448	197.009	9.38942e-45	2.28777e-43
Acinar	ENSG00000154589	ENSSSCG00000006175	LY96	LY96	-2.52659	3.55724	196.933	9.75184e-45	2.37345e-43
Acinar	ENSG00000152061	ENSSSCG00000015499	RABGAP1L	RABGAP1L	-2.3484	7.16967	196.832	1.02612e-44	2.49465e-43
Acinar	ENSG00000133107	ENSSSCG00000009362	TRPC4	TRPC4	2.50213	3.2197	196.763	1.0622e-44	2.57953e-43
Acinar	ENSG00000211896	ENSSSCG00000036983	IGHG1	ENSSSCG00000036983	-5.93043	4.66903	196.755	1.06639e-44	2.58685e-43
Acinar	ENSG00000211897	ENSSSCG00000036983	IGHG3	ENSSSCG00000036983	-5.93043	4.66903	196.755	1.06639e-44	2.58685e-43
Acinar	ENSG00000211892	ENSSSCG00000036983	IGHG4	ENSSSCG00000036983	-5.93043	4.66903	196.755	1.06639e-44	2.58685e-43
Acinar	ENSG00000211893	ENSSSCG00000036983	IGHG2	ENSSSCG00000036983	-5.93043	4.66903	196.755	1.06639e-44	2.58685e-43
Acinar	ENSG00000134716	ENSSSCG00000003825	CYP2J2	CYP2J34	-1.42039	5.57921	196.725	1.08263e-44	2.62336e-43
Acinar	ENSG00000134716	ENSSSCG00000003825	CYP2J2	CYP2J34	-1.42039	5.57921	196.725	1.08263e-44	2.62336e-43
Acinar	ENSG00000065361	ENSSSCG00000020725	ERBB3	ERBB3	-2.24656	12.8234	196.643	1.1286e-44	2.73172e-43
Acinar	ENSG00000142698	ENSSSCG00000003623	C1orf94	C1orf94	-5.54409	2.23645	196.553	1.18071e-44	2.85472e-43
Acinar	ENSG00000175166	ENSSSCG00000046387	PSMD2	PSMD2	1.48838	6.4938	196.246	1.37719e-44	3.32612e-43
Acinar	ENSG00000166924	ENSSSCG00000030337	NYAP1	NYAP1	3.8597	1.72759	196.074	1.50164e-44	3.61874e-43
Acinar	ENSG00000133065	ENSSSCG00000020783	SLC41A1	SLC41A1	-1.77019	3.26502	195.804	1.71963e-44	4.13952e-43
Acinar	ENSG00000113327	ENSSSCG00000017025	GABRG2	GABRG2	4.94016	0.637401	195.542	1.96225e-44	4.7081e-43
Acinar	ENSG00000105202	ENSSSCG00000030510	FBL	FBL	-1.84995	5.6569	195.278	2.24099e-44	5.37106e-43
Acinar	ENSG00000006611	ENSSSCG00000013377	USH1C	USH1C	2.82442	5.20449	194.88	2.73648e-44	6.54434e-43
Acinar	ENSG00000205413	ENSSSCG00000027372	SAMD9	SAMD9	3.9819	0.296507	194.818	2.82304e-44	6.74404e-43
Acinar	ENSG00000118997	ENSSSCG00000032814	DNAH7	DNAH7	4.29661	2.10583	194.814	2.82897e-44	6.75086e-43
Acinar	ENSG00000118997	ENSSSCG00000032814	DNAH7	DNAH7	4.29661	2.10583	194.814	2.82897e-44	6.75086e-43
Acinar	ENSG00000118997	ENSSSCG00000032814	DNAH7	DNAH7	4.29661	2.10583	194.814	2.82897e-44	6.75086e-43
Acinar	ENSG00000085978	ENSSSCG00000016300	ATG16L1	ATG16L1	-1.71111	2.87423	194.56	3.21373e-44	7.66073e-43
Acinar	ENSG00000162076	ENSSSCG00000022630	FLYWCH2	FLYWCH2	5.25243	1.4081	194.374	3.52961e-44	8.4046e-43
Acinar	ENSG00000188290	ENSSSCG00000035420	HES4	HES4	3.18103	3.07351	194.329	3.60905e-44	8.58447e-43
Acinar	ENSG00000073350	ENSSSCG00000033518	LLGL2	LLGL2	1.72076	4.97276	194.217	3.81805e-44	9.07179e-43
Acinar	ENSG00000166821	ENSSSCG00000027052	PEX11A	PEX11A	1.74006	3.60142	193.947	4.37428e-44	1.03822e-42
Acinar	ENSG00000163520	ENSSSCG00000011609	FBLN2	FBLN2	3.21592	1.5047	193.944	4.38103e-44	1.0387e-42
Acinar	ENSG00000006128	ENSSSCG00000023592	TAC1	TAC1	6.62602	1.33793	193.883	4.51641e-44	1.06965e-42
Acinar	ENSG00000123570	ENSSSCG00000032672	RAB9B	RAB9B	3.59831	3.27809	193.523	5.41139e-44	1.28023e-42
[truncated: 53,448 more rows]

## Sheet: Sheet4
Sheet4: Differentially expressed TFs of each cell cluster in the pig integrated scRNA-seq datasets
[truncated: 3,235 more rows]

[truncated: 2 more sheets: Sheet5, Sheet6]
