# Supplementary material for: A multimodal cross-species comparison of pancreas development
Source: Research Square preprint supplement (doi:10.21203/rs.3.rs-4151759/v1), 2024-04-03
Supplement: Supplementary file 7 [file 9cc9e4d67fec304302c0b960.xlsx]

## Sheet: Sheet Content
Supplementary Table 2: Marker genes of cell clusters in the human, pig and mouse pancreas integrated scRNA-seq datasets
Sheet1: Marker genes (Top 500) of cell clusters in pig integrated scRNA-seq atlas
Sheet2: Marker genes (Top 500) of cell clusters in human integrated scRNA-seq atlas
Sheet3: Marker genes (Top 500) of cell clusters in mouse integrated scRNA-seq atlas

## Sheet: Sheet1
Sheet1: Marker genes of cell clusters in pig integrated scRNA-seq atlas
MPC						Acinar						Ductal						NGN3						PEC						FEV						Alpha						Beta						Delta
name	scores	logfoldchanges	pvals	pvals_adj		name	scores	logfoldchanges	pvals	pvals_adj		name	scores	logfoldchanges	pvals	pvals_adj		name	scores	logfoldchanges	pvals	pvals_adj		name	scores	logfoldchanges	pvals	pvals_adj		name	scores	logfoldchanges	pvals	pvals_adj		name	scores	logfoldchanges	pvals	pvals_adj		name	scores	logfoldchanges	pvals	pvals_adj		name	scores
VIM	211.37	3.76788	0	0		ENSSSCG00000023127	884.935	8.23245	0	0		SLC4A4	362.281	6.36687	0	0		TUBB2B	110.933	4.38326	0	0		H2AFZ	41.0682	2.81057	2.65421e-145	5.20088e-143		CHGA	410.319	5.36214	0	0		DIRAS3	477.179	5.1137	0	0		INS	511.268	7.73831	0	0		SST	463.298
TPM1	176.131	2.42511	0	0		CPA1	783.828	7.41865	0	0		ABLIM1	329.459	5.03727	0	0		MDK	110.457	3.05633	0	0		CHGA	41.0608	2.30032	4.38746e-149	8.79108e-147		CHGB	234.865	6.25743	0	0		ENSSSCG00000012517	293.489	5.42957	0	0		ENSSSCG00000008898	504.066	5.57345	0	0		CHGA	225.844
ERP27	154.857	2.78008	0	0		ENSSSCG00000023012	768.63	8.80893	0	0		S100A11	273.593	3.16718	0	0		NEUROG3	104.505	6.17356	0	0		TUBA1B	38.607	2.26608	5.46629e-137	9.71141e-135		C15orf48	148.503	3.94961	0	0		SCGN	266.643	3.78652	0	0		CHGA	384.509	4.3332	0	0		SCGN	168.156
RPSA	153.718	1.09365	0	0		CEL	744.454	7.46477	0	0		ENSSSCG00000017448	255.846	3.56147	0	0		ENSSSCG00000006156	87.2637	2.17099	0	0		ENSSSCG00000009327	33.671	1.64189	8.69454e-119	1.15274e-116		ENSSSCG00000035293	116.36	4.17417	0	0		TTR	233.68	4.62367	0	0		ASB9	366.742	4.4506	0	0		ENSSSCG00000035293	147.592
ID1	149.296	3.54848	0	0		CLPS	673.849	7.96459	0	0		ATP1B1	230.56	2.4038	0	0		MARCKSL1	83.4954	1.7904	0	0		CPE	30.7404	2.00712	7.97909e-108	8.14693e-106		FEV	104.913	4.73047	0	0		CDA	199.826	2.74908	0	0		CPE	304.443	3.47526	0	0		SCG5	146.919
RAN	139.699	1.35874	0	0		PRSS2	600.224	7.71495	0	0		SAT1	230.221	2.97331	0	0		TAGLN3	83.2268	4.16341	0	0		HMGB2	30.3669	3.26339	1.43314e-105	1.40411e-103		CACNA2D1	91.4462	2.80361	0	0		SCG5	198.512	2.45543	0	0		PCSK1N	281.833	2.66411	0	0		DIRAS3	131.47
ID2	138.301	2.98925	0	0		GATM	584.837	5.75158	0	0		MMD	229.549	5.1379	0	0		ENSSSCG00000031023	79.306	3.03055	0	0		STMN1	28.3156	2.5405	2.4904e-97	2.25737e-95		MAP2	77.902	2.58085	0	0		SLC7A2	187.213	3.16304	0	0		ESM1	274.412	6.48606	0	0		HHEX	106.918
RPS9	136.681	0.875738	0	0		PNLIPRP2	581.533	7.5241	0	0		TMSB4X	217.626	1.64396	0	0		TUBA1B	73.9267	2.09014	0	0		CALM1	27.4646	1.3327	1.75229e-94	1.51122e-92		PCSK1N	76.4279	1.47522	0	0		ENSSSCG00000039273	178.086	2.43074	0	0		PAX6	262.019	3.24126	0	0		GPX3	103.28
HNRNPA1	134.078	1.53089	0	0		SPINK1	579.808	6.0217	0	0		ENSSSCG00000011171	215.87	2.26611	0	0		TMSB10	67.29	1.15056	0	0		PCLAF	27.0044	4.71086	8.44574e-92	6.94662e-90		ENSSSCG00000008686	76.0843	2.05683	0	0		SLC3A2	173.824	3.16718	0	0		SCG5	257.729	2.75314	0	0		RBP4	96.3756
RPS6	133.375	0.875261	0	0		ERP27	536.138	5.37533	0	0		DEFB115	215.564	6.77247	0	0		DBN1	66.2991	3.38655	0	0		ENSSSCG00000039273	26.6183	1.7572	8.64742e-91	7.02577e-89		DACH1	74.6114	1.94771	0	0		GLS	166.708	2.80684	0	0		G6PC2	235.951	5.48945	0	0		ENSSSCG00000039273	94.4416
RPL18A	132.618	0.840851	0	0		RPS12	478.09	2.48467	0	0		AHCYL1	209.97	3.32389	0	0		KRT7	65.8475	3.24233	0	0		TUBB	26.4935	2.05217	6.54956e-90	5.21013e-88		RAB26	71.2939	2.12163	0	0		PCSK2	165.43	2.82838	0	0		COX7A2L	235.369	1.79157	0	0		CHGB	92.2156
ACTG1	131.718	1.06069	0	0		RPS15	464.085	2.38001	0	0		GUCY1A1	208.629	3.10895	0	0		ENSSSCG00000001930	65.8288	1.24339	0	0		SMC2	25.0398	3.18217	1.19163e-83	8.53647e-82		DDC	71.2701	3.12498	0	0		CHIA	155.392	3.72787	0	0		SCG2	228.572	3.40845	0	0		CALM1	82.7029
FLRT2	129.796	1.91592	0	0		ENSSSCG00000039460	458.137	2.54408	0	0		RIDA	208.377	2.4754	0	0		H3-3A	64.9535	0.963925	0	0		H2AZ2	24.8432	1.52611	5.63496e-83	4.00442e-81		ENSSSCG00000022176	71.0114	1.45292	0	0		GRIA3	153.678	2.54054	0	0		HADH	225.876	2.40596	0	0		C15orf48	81.709
ENSSSCG00000031023	128.836	2.17215	0	0		ENSSSCG00000029830	454.141	2.32744	0	0		SPARC	206.458	4.30326	0	0		CFLAR	63.1395	2.23645	0	0		HEPACAM2	24.7131	1.72299	1.21467e-82	8.58611e-81		CFAP61	69.7143	2.29114	0	0		CPE	144.038	2.0986	0	0		HIGD1A	221.692	3.23976	0	0		ISL1	81.4223
RPS5	126.119	0.913903	0	0		RPL27A	446.739	2.46164	0	0		ATP1A1	200.901	2.56685	0	0		H3-3B	62.8133	0.911782	0	0		MAD2L1	24.3004	3.64335	1.73718e-80	1.19008e-78		ENSSSCG00000039273	69.7027	1.59454	0	0		SLC7A8	143.008	3.82135	0	0		ANXA2	195.913	3.74507	0	0		RAB26	71.5503
ENSSSCG00000034610	125.81	3.91787	0	0		ENSSSCG00000024974	438.786	2.1354	0	0		DCDC2	193.212	3.07103	0	0		CFAP61	62.3814	2.80035	0	0		ENSSSCG00000028695	23.7683	3.61905	3.0921e-78	2.04979e-76		ENSSSCG00000048856	69.1064	0.951865	0	0		GPX3	140.576	2.45004	0	0		CALM1	195.76	1.75068	0	0		ENSSSCG00000031661	70.8458
MEST	124.987	3.33035	0	0		RPLP1	436.294	2.06186	0	0		FLRT2	192.65	2.20773	0	0		ENSSSCG00000023322	62.1021	2.98445	0	0		DUT	23.7375	1.89278	2.517e-78	1.67271e-76		SCG2	67.511	2.27762	0	0		RAB26	138.763	2.39639	0	0		ENSSSCG00000022176	195.408	1.9914	0	0		CACNA2D1	70.5058
PTMA	123.942	0.830751	0	0		RPS18	424.574	2.21233	0	0		GLIS3	191.466	3.67201	0	0		NKX2-2	60.7891	2.51181	0	0		RPA3	23.1136	1.94342	1.57656e-75	9.9795e-74		NEUROG3	65.5074	3.73713	0	0		ENSSSCG00000024666	136.912	2.57701	0	0		CITED1	188.526	3.62038	0	0		NEUROG3	67.824
ENSSSCG00000033697	123.032	0.868047	0	0		LTC4S	423.718	5.39484	0	0		ENSSSCG00000050015	189.98	5.42166	0	0		PTMA	60.2721	0.827943	0	0		SPC24	22.393	3.73935	2.44041e-72	1.47471e-70		ENSSSCG00000015084	65.2158	2.31244	0	0		PCSK1N	136.413	1.70644	0	0		ENSSSCG00000035293	187.327	2.93041	0	0		ASB9	66.2816
ID3	118.125	3.97105	0	0		RPS5	421.369	2.40823	0	0		NDUFA4	187.919	1.82526	0	0		RFX3	59.6769	2.40312	0	0		FLAD1	20.9014	1.73114	5.2607e-66	2.84944e-64		GPX3	64.7518	1.91916	0	0		KCNK16	131.916	2.64465	0	0		ELP4	184.068	2.91801	0	0		TUSC3	64.6707
ENSSSCG00000020830	114.508	0.840417	0	0		ERBB3	417.198	2.45082	0	0		SLITRK2	187.451	5.11384	0	0		TUBB	57.4826	1.65377	0	0		MAP1B	20.767	2.06564	2.0009e-65	1.07288e-63		ENSSSCG00000007524	63.1845	0.593383	0	0		ENSSSCG00000022176	131.728	1.66615	0	0		TOX	183.73	2.5816	0	0		PCSK1N	64.3901
XBP1	113.027	1.45575	0	0		ENSSSCG00000004489	415.19	1.59793	0	0		CLU	178.21	2.3529	0	0		STMN1	56.1502	2.24988	0	0		SMC4	20.5786	2.54928	1.52956e-64	8.11975e-63		TUSC3	62.6582	1.63162	0	0		ENSSSCG00000008686	131.485	2.29311	0	0		PCSK2	182.825	2.84576	0	0		MPZL1	64.2496
HSP90AB1	112.285	0.947761	0	0		RPS8	401.679	2.13144	0	0		ENSSSCG00000004252	177.508	4.403	0	0		SELENOM	55.683	2.88434	0	0		YWHAH	20.4445	1.44138	4.40132e-64	2.30434e-62		ENSSSCG00000032003	62.5977	1.12969	0	0		GCG	131.481	6.57948	0	0		PDX1	181.767	2.25663	0	0		HEPACAM2	64.0494
CLDN10	111.505	1.70937	0	0		RPS7	399.044	2.1347	0	0		TM4SF1	175.998	3.30225	0	0		HMGB3	53.3082	2.6949	0	0		CFL1	20.2251	0.784578	2.58424e-63	1.32437e-61		ENSSSCG00000006156	58.6899	1.2909	0	0		ENSSSCG00000001930	129.255	1.49858	0	0		SCGN	179.767	2.83229	0	0		PRNP	63.0703
MARCKSL1	110.999	1.37668	0	0		AQP8	394.463	5.21815	0	0		S100A1	175.864	2.37079	0	0		DIRAS3	52.6323	2.34281	0	0		LMNB1	19.9928	2.48867	5.16643e-62	2.56388e-60		ENSSSCG00000028092	58.6366	1.98397	0	0		SLC25A5	127.41	1.51558	0	0		STMN3	178.822	2.52204	0	0		IGFBPL1	62.755
ENSSSCG00000004489	110.172	0.630301	0	0		ENSSSCG00000033697	391.45	2.0299	0	0		GMNN	175.357	2.97202	0	0		HES6	51.8138	3.42436	0	0		PAX6	19.7025	1.46293	5.7675e-61	2.77935e-59		ENSSSCG00000046891	58.5175	2.06532	0	0		ENSSSCG00000006156	123.453	1.64258	0	0		ENSSSCG00000039273	170.513	2.13526	0	0		KCNJ8	60.1627
TMSB4X	109.657	1.02628	0	0		RPS17	385.302	2.02452	0	0		SPP1	174.674	5.6008	0	0		DACH1	51.8084	1.87888	0	0		SCG2	19.6493	1.80114	1.174e-60	5.57681e-59		ENSSSCG00000008748	58.4136	1.64717	0	0		ARPC2	122.231	1.30619	0	0		HEPACAM2	166.588	2.45563	0	0		ETV1	59.9898
SOD3	108.937	3.40334	0	0		EEF1B2	384.086	2.65349	0	0		PTN	173.547	3.11999	0	0		ACTC1	50.9395	6.05534	0	0		CCDC34	19.6328	2.65995	1.96093e-60	9.23264e-59		DIRAS3	58.0569	1.63463	0	0		GLUD1	121.965	4.02599	0	0		RBP2	163.699	4.06667	0	0		CPE	59.5598
RPS18	108.631	0.764613	0	0		PLA2G1B	383.649	7.07664	0	0		CFD	169.449	6.00182	0	0		PSMD2	50.5868	2.3873	0	0		DIRAS3	19.5668	1.47329	1.52209e-60	7.17914e-59		ENSSSCG00000050649	56.6003	3.28103	0	0		HEPACAM2	121.038	2.08477	0	0		GRIA3	162.181	2.39674	0	0		ENSSSCG00000028092	59.5325
ENSSSCG00000029830	108.108	0.777742	0	0		RACK1	382.095	1.96803	0	0		NOTCH2	164.106	3.81711	0	0		NREP	50.2975	1.30942	0	0		ENSSSCG00000017032	19.2488	4.18499	9.74391e-59	4.43873e-57		SMIM5	54.9509	1.50363	0	0		ENSSSCG00000036505	119.996	3.95819	0	0		TTR	161.176	2.99627	0	0		ENSSSCG00000001930	59.2392
RPLP0	107.443	0.653112	0	0		SSR4	381.355	2.53232	0	0		EHF	162.811	3.72001	0	0		RPH3AL	47.8753	2.42782	0	0		SCGN	19.1048	1.55415	2.03501e-58	9.16062e-57		UNC80	54.8788	2.19965	0	0		ATP5IF1	118.668	1.1446	0	0		CNTN1	158.549	3.66029	0	0		ARPC2	58.5715
ENSSSCG00000016998	105.951	0.947996	0	0		RPL35	381.118	2.17274	0	0		CXCL12	162.388	4.00367	0	0		RGS4	46.397	3.05052	1.64171e-300	2.11352e-298		CDK1	19.0729	4.23354	5.61731e-58	2.51589e-56		SCN9A	54.5479	2.468	0	0		ENSSSCG00000035293	116.56	3.04894	0	0		SNAP25	157.096	2.7503	0	0		TOX	55.5242
EEF1G	105.938	0.671954	0	0		RPL24	379.946	2.15559	0	0		HES1	160.663	3.51034	0	0		ENSSSCG00000049534	46.3492	2.43608	2.10662e-300	2.699e-298		ENSSSCG00000016737	18.9495	0.784274	1.3924e-57	6.17407e-56		LSAMP	53.5417	2.23397	0	0		CST3	114.92	1.16692	0	0		GPR137B	154.996	3.08854	0	0		RGS4	55.2506
TYMS	105.851	2.34189	0	0		RPS23	379.155	2.14078	0	0		APP	160.164	1.85222	0	0		PFKP	46.195	3.3979	4.99131e-298	6.30395e-296		ENSSSCG00000022176	18.8785	1.31813	2.52954e-57	1.11421e-55		ELL2	53.3399	1.71515	0	0		CHGA	113.018	1.79722	0	0		ERO1B	152.746	2.35346	0	0		STMN3	54.6511
RPS7	105.659	0.69104	0	0		RPS9	377.527	1.94247	0	0		CNN3	159.676	2.43371	0	0		ENSSSCG00000039222	46.0185	2.42584	9.28207e-298	1.16678e-295		TK1	18.8345	3.9074	6.02127e-57	2.58808e-55		PAX6	53.1385	1.56274	0	0		GPR160	111.369	2.75016	0	0		ENSSSCG00000024666	149.547	2.45187	0	0		ARF5	53.9092
MATN4	103.397	3.71254	0	0		RPL11	376.805	1.88345	0	0		LURAP1L	158.707	2.93867	0	0		ENSSSCG00000013754	44.9932	2.51592	1.02114e-288	1.22029e-286		USP1	18.8023	1.89478	7.0283e-57	3.01606e-55		TOX	52.8153	1.62951	0	0		CFAP61	110.128	2.13896	0	0		PCSK1	149.273	3.5561	0	0		ENSSSCG00000046891	53.4007
ENSSSCG00000037030	103.293	0.610642	0	0		ENSSSCG00000033262	376.223	1.81331	0	0		SFTA2	158.025	3.92697	0	0		CHD7	44.8648	2.01435	3.42469e-288	4.07431e-286		ENSSSCG00000032060	18.6864	1.80233	2.22497e-56	9.41162e-55		STMN3	52.4218	1.54812	0	0		P2RY14	109.994	2.47743	0	0		TUSC3	148.892	1.93749	0	0		ENSSSCG00000022176	52.3417
ENSSSCG00000011272	102.284	0.630381	0	0		ENSSSCG00000036114	375.614	3.08141	0	0		FZD5	155.183	3.74629	0	0		ENSSSCG00000028092	43.0779	2.136	2.19336e-272	2.45591e-270		ISYNA1	18.3908	2.80448	4.72664e-55	1.94084e-53		MT3	51.9277	1.39549	0	0		ETV1	108.767	3.15734	0	0		ARF5	148.221	1.372	0	0		GALP	52.1685
BCAT1	102.196	1.68496	0	0		RPL18A	373.516	1.86419	0	0		VMP1	152.846	2.93912	0	0		ENSSSCG00000002639	43.0431	5.71745	4.36149e-270	4.74405e-268		YWHAQ	18.3317	0.792916	5.45894e-55	2.23122e-53		CALM1	51.5376	0.939065	0	0		UCHL1	107.882	2.2277	0	0		SLC8A1	147.219	2.76401	0	0		MAP1B	51.1785
RPL24	102.089	0.719554	0	0		RPS6	370.317	1.96269	0	0		PAEP	152.02	6.5855	0	0		PCBP4	42.9682	2.44065	8.33837e-271	9.1822e-269		TUBB2B	18.3153	1.71894	8.41212e-55	3.41209e-53		ARF5	50.6562	0.998927	0	0		PRPS2	107.082	1.9093	0	0		SLC30A8	146.058	3.96198	0	0		INS	51.0771
ENSSSCG00000014071	101.859	0.830231	0	0		ENSSSCG00000035768	367.374	1.98907	0	0		CADM1	151.65	2.21661	0	0		SCAND1	42.6206	1.1407	9.70361e-271	1.06416e-268		PSIP1	18.2114	1.27334	2.18009e-54	8.77602e-53		PSMD2	50.2482	1.54332	0	0		ABCC8	106.366	2.35016	0	0		ST3GAL6	145.446	2.52902	0	0		KCNK16	49.3299
TMSB10	98.9013	0.895561	0	0		ENSSSCG00000031381	366.585	3.64116	0	0		COMMD6	151.106	2.99064	0	0		SUMO2	41.9323	0.74082	6.0792e-265	6.3283e-263		SRSF2	18.1938	1.04352	2.48549e-54	9.99033e-53		ENSSSCG00000001930	49.5826	0.783058	0	0		STMN3	104.623	1.97123	0	0		ABCC8	144.039	2.63986	0	0		ARL3	48.7874
CDC25C	98.5919	2.24991	0	0		RPSA	363.569	2.13076	0	0		SOX9	150.658	2.7663	0	0		PLPPR3	41.2555	2.81625	2.58588e-255	2.57131e-253		SKA2	18.1809	2.17816	3.61214e-54	1.44534e-52		ENSSSCG00000051070	48.9167	0.752515	0	0		GALP	103.772	2.75385	0	0		ENSSSCG00000046891	140.899	2.41923	0	0		ATP6V1G1	48.7579
CCKAR	97.7226	2.63939	0	0		ENSSSCG00000033019	353.692	2.12729	0	0		ENSSSCG00000033537	149.736	3.50471	0	0		KCNB2	41.0532	2.41303	5.79994e-254	5.72454e-252		RAD21	18.1618	1.57116	4.07219e-54	1.62698e-52		ENSSSCG00000031661	48.8483	1.01461	0	0		DYNLL1	102.878	1.3579	0	0		PTGER3	140.659	5.62617	0	0		ENSSSCG00000048856	48.4278
ENSSSCG00000016737	94.7724	0.818958	0	0		RPL7	353.518	1.69122	0	0		COL18A1	149.656	2.53983	0	0		NOL4	40.9529	2.36169	3.71936e-253	3.65746e-251		INS	18.1321	3.07237	4.48425e-54	1.78626e-52		SCG5	48.6975	0.961617	0	0		TMED3	100.997	2.39994	0	0		ACLY	137.482	1.80745	0	0		CASR	48.2953
TUBB	94.1118	1.6989	0	0		ENSSSCG00000003165	351.22	2.04018	0	0		TSTD1	148.634	2.39645	0	0		CFL1	40.9255	0.903248	3.03481e-256	3.02901e-254		TUBB4B	18.0529	2.28721	1.33899e-53	5.2707e-52		ENSSSCG00000011489	48.525	2.02628	0	0		PAX6	100.528	1.76577	0	0		BTG1	136.392	1.24334	0	0		PCSK1	47.7428
CPA1	92.1293	2.41998	0	0		PNLIPRP1	350.913	7.03081	0	0		ENSSSCG00000015084	147.747	3.00968	0	0		TUSC3	40.9144	1.75196	4.6006e-254	4.55767e-252		DYNLL1	18.048	1.10572	1.03021e-53	4.07936e-52		CFLAR	48.4397	1.50738	0	0		BEX3	100.205	0.90528	0	0		eGFP_minus	135.755	5.05751	0	0		GRIA3	47.6692
ENSSSCG00000003165	92.0099	0.617058	0	0		RPL18	349.379	1.81326	0	0		CCN1	147.009	5.23587	0	0		DDAH2	40.6739	2.06738	4.51568e-251	4.39191e-249		SCG5	17.7993	1.14966	8.45103e-53	3.27342e-51		KCNB2	47.8088	2.00661	0	0		TUSC3	99.6907	1.60831	0	0		LGI2	132.754	1.44691	0	0		BEX3	46.0942
RPL6	91.4562	0.529955	0	0		SRM	348.088	4.61046	0	0		SCTR	146.409	5.95617	0	0		TUBB4B	40.4805	1.77021	4.45388e-250	4.28489e-248		FAM162B	17.7042	1.79143	3.85728e-52	1.46847e-50		RFX3	47.5762	1.66165	0	0		CALM1	99.4597	1.18665	0	0		DIRAS3	131.537	1.81937	0	0		QSOX1	45.9029
SELENOW	91.3521	1.48997	0	0		ENSSSCG00000017509	347.584	1.77868	0	0		SPON1	145.909	4.05874	0	0		ECHDC1	40.3369	2.71343	4.21054e-247	3.95094e-245		PCNA	17.6615	2.46667	6.57643e-52	2.47886e-50		PTPN18	46.9323	1.45753	0	0		OAZ1	98.4381	0.733917	0	0		CALCOCO2	130.846	2.37896	0	0		MAP1LC3A	45.6053
RTRAF	91.3455	1.12472	0	0		RPL6	347.072	1.67281	0	0		MDK	145.264	1.74887	0	0		RAB26	40.0412	1.88196	3.11756e-246	2.90489e-244		STPG4	17.635	0.914212	7.31332e-52	2.74884e-50		ARL3	46.8088	1.14737	0	0		GUCA2B	98.056	3.45996	0	0		RTN4	130.706	1.67588	0	0		MAP2	45.3135
ENSSSCG00000033019	89.4518	0.681004	0	0		RPS16	345.559	1.85641	0	0		MAGI1	145.213	2.61819	0	0		C12orf57	39.2331	1.34809	3.05269e-239	2.76704e-237		RTN4	17.609	1.14976	7.94935e-52	2.97411e-50		NEGR1	46.3168	2.13831	0	0		RAB3C	96.8333	2.57097	0	0		ENSSSCG00000008686	129.263	1.88751	0	0		KDELR3	44.958
NAP1L1	86.9672	1.077	0	0		RPL29	344.942	1.8186	0	0		FGFR2	145.11	4.23036	0	0		TM4SF1	38.2943	2.39824	8.12568e-230	7.12307e-228		NUF2	17.6063	3.58111	1.18808e-51	4.42194e-50		NEUROD1	46.2942	1.86319	0	0		ARX	96.2331	4.11046	0	0		EIF1B	128.25	1.25396	0	0		P2RY14	44.6072
RPL7	86.7381	0.5123	0	0		RPS20	343.5	1.78608	0	0		COL5A2	141.674	4.05576	0	0		CSRP1	38.1193	1.8028	1.16408e-228	1.00393e-226		DEK	17.6001	1.30021	1.02173e-51	3.80813e-50		MAP1B	46.2313	1.88634	0	0		RGS4	95.8316	2.70492	0	0		LGI4	125.623	3.29583	0	0		GNB2	44.2051
ENSSSCG00000012427	86.7173	0.501668	0	0		RPS27A	342.741	1.79943	0	0		CDC26	141.495	2.21001	0	0		TAMALIN	38.1155	3.69362	2.24716e-227	1.90715e-225		LSM4	17.5361	1.49852	1.99433e-51	7.37126e-50		RGMB	46.1668	3.31879	0	0		ENSSSCG00000004253	93.7396	1.99598	0	0		EID1	125.568	1.65	0	0		ENSSSCG00000006156	43.8592
HSPE1	85.916	0.878687	0	0		ENSSSCG00000011272	339.595	1.71893	0	0		CACHD1	140.954	5.18137	0	0		ADGRD1	38.061	2.63201	1.7147e-227	1.45991e-225		TPX2	17.529	3.81649	2.55852e-51	9.4174e-50		CPLX2	45.8498	2.10255	0	0		CTSZ	92.1562	3.2639	0	0		SCOC	123.921	1.6179	0	0		NPTX2	43.7078
ENSSSCG00000016687	85.4844	2.55326	0	0		RPL26	338.121	1.72651	0	0		KCNE3	140.699	5.58395	0	0		ENSSSCG00000049691	38.0285	2.69186	4.76435e-227	4.01789e-225		TUSC3	17.4637	1.16617	3.18031e-51	1.16578e-49		SYT13	45.647	2.25231	0	0		ARF5	91.2391	1.16891	0	0		KCNJ11	122.084	2.86716	0	0		CFAP61	43.3799
RPL27	84.8886	0.690022	0	0		RPS25	338	1.82768	0	0		CAMK2D	140.661	2.95706	0	0		RFX6	37.6552	2.61185	7.83659e-224	6.44559e-222		TOP2A	17.4494	3.89981	5.58597e-51	2.03919e-49		ATP6V1B2	45.222	1.64969	0	0		IGFBP5	90.551	1.97716	0	0		ENSSSCG00000012452	122.079	1.80353	0	0		PCSK2	43.077
KARS1	83.6367	1.04733	0	0		RPLP0	333.742	1.7349	0	0		AVPI1	140.498	2.71991	0	0		RUNX1T1	37.5815	2.0448	1.64248e-223	1.34679e-221		ENSSSCG00000039222	17.4305	1.77741	5.81671e-51	2.11762e-49		UBL5	45.0067	0.566704	0	0		SCG2	90.3749	1.76976	0	0		ENSSSCG00000012238	121.481	1.69106	0	0		ROS1	42.9339
CRABP2	83.557	5.26112	0	0		PRDX4	333.276	3.38436	0	0		C3	140.442	4.31792	0	0		RET	37.3263	3.90997	1.75564e-220	1.40922e-218		PCSK1	17.1244	2.16819	1.26466e-49	4.47568e-48		SOX5	44.9535	1.52144	0	0		ZFAND6	90.1805	1.33448	0	0		SLC7A2	120.239	1.97768	0	0		NEGR1	42.2216
ONECUT1	83.3882	1.59099	0	0		RPL23	328.71	1.6771	0	0		NFIB	140.071	2.59124	0	0		HPCAL1	36.8673	2.91284	9.3606e-217	7.3802e-215		STMN3	17.0224	1.39614	2.83764e-49	9.93697e-48		MLXIPL	44.9444	1.76906	0	0		KCNB2	89.9243	2.23731	0	0		CFAP61	119.952	1.87909	0	0		RAB3C	41.1906
ENSSSCG00000024974	83.1773	0.581011	0	0		ND3	327.354	2.34111	0	0		APOA1	140.024	3.30856	0	0		REV3L	36.6655	2.25737	3.0665e-215	2.38248e-213		SIVA1	16.9023	1.40342	1.08623e-48	3.74474e-47		KIAA0408	44.9245	1.94054	0	0		SLC16A10	89.1902	2.43761	0	0		ENSSSCG00000011489	118.924	2.46358	0	0		DAZAP1	41.1153
RPS3A	82.8599	0.514403	0	0		NUPR1	322.963	4.36168	0	0		ENSSSCG00000031023	137.443	1.92289	0	0		COX7A2	36.4606	0.760221	7.04165e-216	5.53549e-214		IDI1	16.8655	1.3705	1.44298e-48	4.94904e-47		TM4SF4	44.914	1.64469	0	0		SLC25A53	89.0743	2.85788	0	0		ROBO2	118.924	2.95404	0	0		GABARAPL2	41.0787
MBP	82.1663	2.15719	0	0		RPS3A	322.911	1.77738	0	0		CFTR	135.42	5.90893	0	0		QSOX1	36.2554	1.92601	3.43347e-212	2.61425e-210		ATAD2	16.8144	3.04923	2.90069e-48	9.91032e-47		ENSSSCG00000002913	44.8482	1.92084	0	0		ENSSSCG00000007524	88.8756	0.693313	0	0		CACNA1D	118.329	2.54662	0	0		ENSSSCG00000050649	40.9404
CTHRC1	81.9812	5.05104	0	0		RPL22	321.317	1.8613	0	0		SERPINH1	135.33	2.89164	0	0		CYTH2	36.1338	1.46142	1.63179e-211	1.23539e-209		HMMR	16.8037	3.73423	3.29153e-48	1.12025e-46		ENSSSCG00000041220	44.6489	0.83149	0	0		SCOC	88.7849	1.47737	0	0		GPX3	118.311	1.97055	0	0		BAMBI	40.7403
YBX1	81.5927	0.918257	0	0		XBP1	317.141	2.63255	0	0		ITM2B	135.069	1.30866	0	0		NONO	35.7559	1.10453	6.0862e-209	4.55593e-207		CKAP2	16.731	4.10932	6.79802e-48	2.29899e-46		C4BPB	44.3986	2.44837	0	0		RTN4	88.3003	1.43743	0	0		MAST4	115.878	1.5569	0	0		TERF2IP	40.3011
ENSSSCG00000034448	80.2974	0.594091	0	0		AMBP	311.255	3.94568	0	0		WFDC2	134.986	1.82204	0	0		DUSP4	35.6616	4.18002	6.35214e-206	4.70218e-204		UBE2C	16.6978	4.16625	9.37494e-48	3.15048e-46		PCYT1A	44.2266	1.35296	0	0		NOL4	86.6554	2.13958	0	0		ENSSSCG00000002891	115.561	2.47368	0	0		PEX5L	39.7031
RPS4X	80.1352	0.506539	0	0		EEF1G	308.421	1.48665	0	0		FBN2	134.186	6.11648	0	0		HDAC2	35.3589	1.34381	8.70384e-205	6.38977e-203		CKS2	16.6342	2.70223	1.68186e-47	5.59548e-46		TRMT112	43.8786	0.686681	0	0		NEUROD1	86.5757	2.10389	0	0		CALML4	115.494	2.34732	0	0		CST3	39.5907
HNRNPA0	80.0593	1.26221	0	0		SERPINI2	307.408	6.20124	0	0		PPARGC1A	133.416	5.046	0	0		TMEM51	34.9703	2.40246	1.83773e-200	1.32005e-198		ENSSSCG00000035544	16.6315	1.52641	1.59292e-47	5.3062e-46		ENSSSCG00000008898	43.7042	1.35794	0	0		ARL3	86.4445	1.25198	0	0		ENSSSCG00000051070	114.165	0.955468	0	0		ENSSSCG00000013754	39.3282
ENSSSCG00000035007	78.7655	0.515335	0	0		EEF1D	306.923	2.40897	0	0		COL9A3	131.866	4.38719	0	0		CACNA2D1	34.5261	2.22161	1.00384e-196	7.0771e-195		BBS7	16.5476	3.31846	4.06771e-47	1.34659e-45		BMP3	43.4132	3.59204	0	0		PGRMC1	86.3102	1.03728	0	0		P2RY14	114.008	2.23708	0	0		ENSSSCG00000039222	38.9577
HNRNPDL	78.7015	0.974608	0	0		NUDT3	300.548	1.63395	0	0		ENSSSCG00000049691	131.629	3.12107	0	0		MEST	34.2829	1.91662	4.64926e-195	3.25192e-193		NCAM1	16.5099	2.30244	5.54455e-47	1.83321e-45		HEPACAM2	43.2969	1.34855	0	0		GNAI1	85.857	2.12065	0	0		UCHL1	113.126	1.89867	0	0		ENSSSCG00000048184	38.8607
TSPAN6	78.2238	1.54309	0	0		RPL21	300.377	1.94122	0	0		ADGRD1	130.108	3.44948	0	0		PROX1	33.7712	1.63787	1.36499e-190	9.0939e-189		ENSSSCG00000016679	16.4764	2.03374	7.66201e-47	2.52392e-45		TMED8	43.2375	2.27605	0	0		BTG1	85.7986	1.06617	0	0		MEIS2	111.168	1.47435	0	0		DYNLL1	38.6538
ILF2	77.7347	1.34276	0	0		SSR2	298.446	1.75863	0	0		KCNQ1	129.492	3.33928	0	0		KIAA0408	33.7678	2.18562	3.88313e-190	2.56143e-188		RPA2	16.4153	2.22222	1.41403e-46	4.62362e-45		RUNX1T1	42.7647	1.39332	0	0		GNB2	85.741	0.966819	0	0		UNC80	110.315	2.21965	0	0		PCDH9	38.4602
ENSSSCG00000009327	77.4964	1.04889	0	0		CISD3	295.632	3.19609	0	0		ENSSSCG00000035223	129.351	3.14891	0	0		TAX1BP3	33.7383	1.65269	2.13504e-190	1.41887e-188		TOX	16.4068	1.28679	1.21244e-46	3.9742e-45		MAST4	42.7571	1.21123	0	0		TMEM59	85.5302	1.01976	0	0		ANXA4	109.62	1.45254	0	0		PAX6	38.4543
SLC25A6	77.4348	0.537979	0	0		ENSSSCG00000039544	295.02	1.44174	0	0		ENSSSCG00000023322	128.839	2.89938	0	0		PRDX2	33.7133	0.675224	1.23316e-191	8.36198e-190		PHF1	16.3589	3.05828	2.55544e-46	8.27461e-45		COX8A	42.1566	0.464435	0	0		GBE1	84.6116	2.00453	0	0		DACH1	109.569	1.41023	0	0		SMIM5	37.7829
MAP4K4	77.0998	2.06513	0	0		HSD11B1L	294.77	1.84308	0	0		BICC1	128.769	4.39127	0	0		RNF146	33.5852	1.78748	9.50695e-189	6.22483e-187		CDKN3	16.3475	3.16492	2.8682e-46	9.23125e-45		ATP6V1F	41.6855	1.08128	1.77614e-305	1.01354e-303		MIF	83.7637	0.732626	0	0		ENPP2	108.461	2.19426	0	0		ENSSSCG00000008686	37.6733
HSD17B2	77.0512	2.46033	0	0		PSMB10	294.42	4.58286	0	0		PAPSS1	128.176	2.52798	0	0		ENSSSCG00000015083	33.3823	1.60005	3.51323e-187	2.28352e-185		CCDC88A	16.3427	1.82343	2.72412e-46	8.78876e-45		COX17	41.188	0.916123	2.38628e-300	1.33878e-298		ENSSSCG00000012560	83.3055	1.79235	0	0		KCNK16	108.331	1.97204	0	0		DACH1	37.4605
EEF2	75.7748	0.657153	0	0		ENSSSCG00000009146	294.419	1.75606	0	0		ATF3	127.594	2.62161	0	0		KHDRBS1	33.0596	1.15383	6.27381e-185	4.0679e-183		ZWINT	16.2892	4.01088	5.16587e-46	1.64869e-44		ENSSSCG00000029160	41.0968	1.30244	7.96912e-300	4.45218e-298		BEX1	83.1679	0.885591	0	0		SEMA5A	108.268	3.11471	0	0		MEST	37.3673
NONO	75.5179	1.21625	0	0		PDIA2	293.921	6.82761	0	0		AUTS2	127.282	1.82545	0	0		ENSSSCG00000035293	32.437	1.70597	1.36757e-180	8.61566e-179		HNRNPA0	16.0858	0.960472	2.9611e-45	9.27265e-44		ENSSSCG00000013754	40.8927	1.8155	3.24058e-294	1.76964e-292		MLXIPL	82.0536	1.94162	0	0		NDFIP1	107.97	1.20963	0	0		OTULINL	37.0856
NUDT3	75.1947	0.516119	0	0		ENSSSCG00000020830	293.57	1.7847	0	0		VAV3	127.215	3.50756	0	0		APOBEC2	32.3786	1.21502	2.3704e-179	1.47936e-177		CENPF	16.0153	3.66757	7.39092e-45	2.29558e-43		TAGLN3	40.8555	2.07311	2.43532e-293	1.32446e-291		ISL1	82.0336	2.37845	0	0		GJD2	107.347	3.35168	0	0		SCG3	37.0303
NR5A2	75.1361	1.8215	0	0		RPS4X	291.789	1.50416	0	0		MEIS1	126.931	1.6364	0	0		PSAP	32.2088	1.27969	2.31009e-177	1.42174e-175		NCAPG	15.8544	3.21769	3.52823e-44	1.07579e-42		NDUFB4	40.5544	0.775716	1.18431e-292	6.41475e-291		SLC22A17	82.0233	2.19968	0	0		GRK3	107.343	1.90693	0	0		SYT13	36.9353
GRHPR	74.1704	1.48417	0	0		RPLP2	289.975	1.77764	0	0		AGAP3	125.263	2.21053	0	0		SERPINI1	32.1979	1.57274	4.76237e-177	2.91753e-175		GAPDH	15.8508	0.724157	2.71735e-44	8.30444e-43		FOS	40.3194	1.05908	1.35091e-290	7.28752e-289		SNAP25	81.9217	1.76978	0	0		ENSSSCG00000031661	106.644	1.30619	0	0		BEX1	36.5948
EEF1B2	74.1373	0.689956	0	0		RPL36A-HNRNPH2	288.907	1.9	0	0		PTPRK	124.773	2.13722	0	0		CBX3	31.8402	1.18146	2.43042e-174	1.46534e-172		CFAP61	15.775	1.3053	5.97344e-44	1.80961e-42		ENSSSCG00000034387	39.9005	1.18353	5.13632e-284	2.73209e-282		FAM162B	81.8853	2.08887	0	0		PSAP	106.056	1.3538	0	0		RFX6	36.1305
ENSSSCG00000039460	73.9393	0.615445	0	0		RPS3	287.54	1.49763	0	0		BTG3	124.538	2.34353	0	0		MACROH2A2	31.6725	1.60115	2.00143e-172	1.19054e-170		IGFBP2	15.7595	1.45414	7.66107e-44	2.31212e-42		SCOC	39.6076	1.15843	5.25012e-281	2.75414e-279		ENSSSCG00000028092	81.6829	1.75826	0	0		CCDC115	105.357	1.49173	0	0		ENSSSCG00000024666	36.1273
JAG1	73.6758	2.86862	0	0		CD79A	285.284	2.08098	0	0		SORBS2	124.429	1.3784	0	0		TPPP3	31.5351	2.43823	8.67535e-171	5.08108e-169		RANBP1	15.7374	1.19348	9.53874e-44	2.87229e-42		COX7A2L	39.4491	0.741027	1.2909e-281	6.81214e-280		ENSSSCG00000041267	81.122	2.42814	0	0		CACNA2D1	105.273	1.84794	0	0		H3-3B	36.0341
SSR4	73.3389	0.661945	0	0		BCAT1	285.241	3.01909	0	0		ONECUT1	123.677	1.77967	0	0		HNRNPM	31.266	0.95033	1.2218e-169	7.06285e-168		SMC3	15.6242	1.07075	2.78407e-43	8.28042e-42		MAP1LC3A	39.2971	1.18292	3.50868e-277	1.81912e-275		IGFBPL1	80.8323	3.64045	0	0		B2M	105.155	1.52963	0	0		ENO2	35.6331
HHIP	73.2139	2.1956	0	0		ENSSSCG00000035007	282.414	1.66604	0	0		KMO	123.204	3.4297	0	0		SYT13	31.0869	2.13415	3.79668e-167	2.15731e-165		GRIA3	15.5879	1.23408	3.62293e-43	1.07275e-41		GABARAPL2	39.1458	0.844586	1.10439e-276	5.71476e-275		ELL2	80.4352	1.57628	0	0		NRXN1	105.098	2.46353	0	0		NEUROD1	35.508
ENSSSCG00000018055	73.0193	1.91998	0	0		RPL35A	282.198	1.65072	0	0		GPR37	123.204	4.52763	0	0		ENSSSCG00000011000	31.0656	0.900859	4.10857e-168	2.34956e-166		SGO2	15.5438	3.51715	7.28374e-43	2.13301e-41		DCTN3	39.1388	1.14999	3.4182e-275	1.76192e-273		GABARAPL2	80.418	1.03066	0	0		CRYBA2	104.282	2.47742	0	0		CITED1	35.3879
TMPRSS4	72.4656	2.25268	0	0		RBPJL	278.845	3.92048	0	0		PBX3	122.782	2.36908	0	0		CYCS	30.8902	1.2614	6.37099e-166	3.60468e-164		UCHL1	15.53	1.28111	6.59106e-43	1.93442e-41		CELF3	39.0534	2.06696	2.7874e-272	1.42849e-270		CFL1	80.3945	0.775034	0	0		MLXIPL	104.006	1.96979	0	0		RHBDD2	35.1576
EEF1D	71.192	0.791715	0	0		ENSSSCG00000012427	278.197	1.63665	0	0		CCN2	122.437	5.23946	0	0		DLGAP4	30.6578	2.41844	2.36381e-163	1.31785e-161		ACLY	15.4857	1.12327	1.04263e-42	3.03663e-41		DYNLL1	39.0091	0.916125	3.54318e-275	1.82282e-273		C4BPB	80.2516	2.84022	0	0		HSPB1	103.448	1.15594	0	0		ENSSSCG00000034868	35.1354
NPNT	71.1624	1.67787	0	0		ENSSSCG00000013906	277.68	1.43244	0	0		GSTA1	121.762	5.89527	0	0		TERF2IP	30.6192	1.16488	6.34196e-164	3.55056e-162		SRSF3	15.259	0.791434	9.09899e-42	2.58506e-40		H2AC21	38.8884	1.71414	7.21133e-271	3.66746e-269		EID1	79.4525	1.37544	0	0		ENSSSCG00000001930	103.395	0.846083	0	0		TAGLN3	35.1161
ZBTB16	70.4622	2.09452	0	0		RPS21	276.629	1.81856	0	0		NFIA	121.275	1.65002	0	0		ARHGAP32	30.3574	1.91747	5.43901e-161	2.98854e-159		SNAP25	15.0842	1.35555	5.14977e-41	1.4192e-39		ANXA4	38.7287	1.15394	9.29187e-271	4.71655e-269		MGST1	79.1832	1.97588	0	0		MAP1LC3A	103.072	1.48534	0	0		KDSR	34.9579
NREP	69.66	0.963894	0	0		RPL10	276.512	2.27455	0	0		ENSSSCG00000050022	121.227	2.18512	0	0		ENSSSCG00000022176	30.2008	1.08273	7.58077e-161	4.15679e-159		KIF20B	15.0774	2.81777	6.482e-41	1.76987e-39		ENSSSCG00000033807	38.281	1.95375	1.55023e-263	7.63623e-262		ANXA10	78.9545	2.5388	0	0		CACNB2	102.86	2.00105	0	0		GUCY1B1	34.8632
RPL11	69.6547	0.429249	0	0		RPL36AL	273.188	1.99104	0	0		DIPK2A	120.496	3.51999	0	0		GSN	29.9786	2.64613	1.71164e-157	9.17779e-156		CENPE	14.9799	3.77351	1.68605e-40	4.54772e-39		ENO2	37.9591	1.92376	4.0445e-260	1.95257e-258		GRN	78.9126	1.34241	0	0		STPG4	102.323	0.666412	0	0		ENSSSCG00000012517	34.524
ENSSSCG00000033262	69.5553	0.440112	0	0		RPL38	271.437	1.99208	0	0		PDGFD	120.211	3.39703	0	0		DYNLT1	29.9046	1.09579	8.82096e-158	4.73931e-156		ENSSSCG00000012517	14.9528	1.37612	1.71733e-40	4.62742e-39		RGS4	37.8756	1.84537	1.19945e-259	5.7697e-258		EIF1B	78.8183	0.999112	0	0		PCYT1A	101.368	1.40137	0	0		YPEL3	34.4671
ZFHX3	69.5352	1.57565	0	0		CDC25C	268.487	4.15487	0	0		LPP	119.485	1.72198	0	0		FSCN1	29.7536	2.59901	1.01338e-155	5.35823e-154		MXD3	14.8852	2.99075	4.12345e-40	1.09776e-38		ENSSSCG00000002449	37.8622	0.779346	9.88437e-262	4.82433e-260		MAST4	78.2875	1.36789	0	0		MAP1B	100.205	1.99724	0	0		CFLAR	34.3124
ENSSSCG00000021591	69.4903	1.09022	0	0		RPL37	266.844	1.79632	0	0		YAP1	118.582	2.94638	0	0		HID1	29.5079	2.14252	8.74345e-154	4.5867e-152		GPX3	14.8836	1.26544	3.39256e-40	9.05896e-39		APLP1	37.4893	1.52992	2.57561e-255	1.21482e-253		CSTB	77.5931	1.12328	0	0		ENSSSCG00000035992	100.051	1.6651	0	0		RPH3AL	34.3119
CTBP2	68.5772	1.37218	0	0		CLDN10	263.018	2.81363	0	0		ZFP36L1	118.141	2.03531	0	0		ENSSSCG00000017448	29.3213	1.52848	1.03648e-152	5.38426e-151		ASF1B	14.8412	4.49922	6.43004e-40	1.6949e-38		CCDC88A	37.2881	1.71914	1.12054e-252	5.2205e-251		AAMP	77.4913	1.51441	0	0		USH1C	99.9511	1.93532	0	0		SKP1	33.9306
SLC22A23	68.5705	1.52507	0	0		TXNIP	261.923	2.621	0	0		CLDN4	116.173	1.9799	0	0		TOX	29.0747	1.36013	8.2929e-151	4.21751e-149		HSPA8	14.7878	0.766587	8.74411e-40	2.30259e-38		KCNIP4	37.0272	3.46459	2.01367e-248	9.20452e-247		MIEN1	77.487	1.4292	0	0		NKX6-1	99.9419	2.30706	0	0		CPLX2	33.8536
RRBP1	68.0937	1.2411	0	0		SNORA70-32	256.727	2.57232	0	0		RHOB	115.343	1.79298	0	0		CACNB2	29.0177	1.59733	5.89419e-150	2.99189e-148		BIRC5	14.7719	3.07498	1.21391e-39	3.18715e-38		ATP6V1G1	36.946	0.607677	4.36304e-252	2.02436e-250		SMS	77.4499	1.35545	0	0		PFKFB2	99.7117	3.46443	0	0		ENSSSCG00000037043	33.7326
RPS16	67.6475	0.4482	0	0		SEC61B	255.141	1.80229	0	0		TCF7L2	115.067	1.79286	0	0		ENSSSCG00000040134	28.9569	2.35531	4.64337e-149	2.33915e-147		NUCKS1	14.718	0.818041	1.77299e-39	4.63674e-38		NOL4	36.8076	1.60648	1.41389e-247	6.42983e-246		DBI	77.2423	1.0659	0	0		CFL1	99.5195	0.758648	0	0		NEUROG1	33.5723
ENSSSCG00000032242	66.7957	1.3922	0	0		RPS13	253.625	1.8443	0	0		COL4A2	114.852	2.89158	0	0		TUBA4A	28.9387	1.63823	3.19506e-149	1.6126e-147		PFN1	14.7009	0.889777	2.05775e-39	5.36565e-38		REV3L	36.5694	1.5564	1.03807e-244	4.65715e-243		CCDC115	76.6547	1.42501	0	0		RUNX1T1	99.4472	1.48402	0	0		DSTN	33.513
NME2	66.6609	0.736381	0	0		RPL27	252.381	1.67969	0	0		ENC1	114.612	3.71674	0	0		ENSSSCG00000023228	28.8977	2.37953	1.32309e-148	6.61519e-147		CDC20	14.6307	3.68508	4.75807e-39	1.23105e-37		GCH1	36.3342	2.52125	3.51148e-241	1.54929e-239		SNRPN	76.3134	1.15191	0	0		ATP6V1G1	99.3007	0.778084	0	0		TM4SF4	33.1445
SNRPE	66.4394	0.825795	0	0		SSR3	249.833	2.45013	0	0		TPM4	113.343	1.86239	0	0		JAK1	28.8864	1.16993	5.51842e-149	2.7695e-147		SPC25	14.6252	3.29087	4.99351e-39	1.29071e-37		RAB3C	36.2452	1.66629	3.30863e-241	1.46222e-239		PLD3	75.8112	1.47661	0	0		GPD1	98.9418	1.16564	0	0		CCDC88A	32.6319
IGFBP2	66.0426	1.51407	0	0		ENSSSCG00000034448	244.467	1.51481	0	0		WWTR1	113.137	3.93823	0	0		ENSSSCG00000040203	28.7022	1.14891	1.61812e-147	8.04501e-146		NDC80	14.6228	4.33476	5.17399e-39	1.33477e-37		ZEB1	36.0111	1.76501	2.15818e-238	9.4284e-237		ENSSSCG00000032060	75.6316	1.66658	0	0		RAB26	98.9229	1.62034	0	0		LY6H	32.607
ENSSSCG00000022842	65.9975	1.74951	0	0		RNASE4	243.906	5.0927	0	0		PKHD1	111.18	5.49404	0	0		CBFA2T2	28.5896	2.94085	6.46039e-146	3.16476e-144		CENPU	14.6105	3.43765	5.74812e-39	1.48002e-37		CALML4	35.8033	1.51691	1.74578e-236	7.57709e-235		CDH17	75.1995	3.06049	0	0		NREP	98.7271	0.982172	0	0		EID1	31.5541
H2AFZ	65.9115	1.33353	0	0		SNORD33-1	243.23	1.47375	0	0		PUM3	110.693	2.8151	0	0		MAP1B	28.5338	1.87405	9.80341e-146	4.78482e-144		DTYMK	14.6037	1.54274	5.67459e-39	1.4625e-37		ACLY	35.2449	1.04182	3.35189e-231	1.43148e-229		ALDOB	74.6084	2.7507	0	0		TMEM52	98.2277	2.37443	0	0		NOL4	31.5011
RPL18	65.7718	0.419628	0	0		ENSSSCG00000014071	238.333	1.69272	0	0		CDK6	110.295	1.86911	0	0		SMARCE1	28.4995	1.17722	7.97003e-146	3.89713e-144		DLGAP5	14.358	3.7457	6.35859e-38	1.59258e-36		ENSSSCG00000041677	35.2443	1.6861	8.22933e-230	3.46999e-228		ENSSSCG00000031661	74.1487	1.13366	0	0		SYT13	97.8778	2.43483	0	0		APLP1	31.4818
CDH4	65.7542	2.53997	0	0		RPL31	237.011	1.58788	0	0		TAX1BP3	109.909	2.04132	0	0		SBK1	28.4932	2.09287	2.43062e-145	1.17985e-143		HINT1	14.315	0.715466	8.31454e-38	2.07272e-36		ENSSSCG00000042993	35.1329	4.17306	1.74317e-227	7.23579e-226		COX8A	74.0567	0.579551	0	0		ENO2	97.6246	2.49801	0	0		DCTN3	31.4274
MEIS1	65.2644	1.20839	0	0		RRBP1	235.921	2.77354	0	0		GAPDH	109.655	0.89293	0	0		JARID2	28.3295	1.55625	3.77966e-144	1.81813e-142		AURKB	14.313	2.86329	9.65926e-38	2.39897e-36		SH3BGRL3	34.9319	0.917666	1.06875e-227	4.45714e-226		ENSSSCG00000049532	73.9897	2.32011	0	0		ZFAND6	96.8191	1.09871	0	0		NOVA1	31.356
H3-3A	65.113	0.429971	0	0		SYCN	234.386	6.6566	0	0		KRT7	108.956	2.45983	0	0		PARD3	28.2341	1.58379	2.28971e-143	1.09352e-141		TMEM254	14.3083	1.40772	9.30742e-38	2.31375e-36		KCNH6	34.912	2.77858	2.10537e-225	8.68513e-224		GPR119	73.6843	6.32644	0	0		SLC25A5	96.402	1.00308	0	0		EIF1B	31.1302
ENSSSCG00000017509	64.8568	0.4496	0	0		RPS29	233.084	1.63025	0	0		SPHK1	108.079	4.23508	0	0		ENSSSCG00000029251	28.1953	2.13225	8.23469e-143	3.91868e-141		TPM3	14.3041	0.909318	8.99071e-38	2.2371e-36		TMA7	34.8865	0.446663	5.15664e-229	2.16408e-227		PNKD	73.5348	1.10199	0	0		SLC3A2	96.2716	1.68289	0	0		PCBD1	31.0695
RPL21	64.4717	0.462207	0	0		TFF2	232.766	5.2661	0	0		SOX6	107.965	2.28267	0	0		SDCBP	28.1422	1.04643	4.92937e-143	2.34996e-141		MDH1	14.2835	1.00403	1.14495e-37	2.83567e-36		FMC1	34.6858	1.20431	2.97085e-224	1.21988e-222		SCG3	73.2523	1.99182	0	0		NEUROD1	96.2592	1.85113	0	0		TMEM59	31.0063
MFAP2	63.8591	2.14892	0	0		ND5	232.647	1.39969	0	0		PDGFA	107.833	2.24795	0	0		ENSSSCG00000042788	27.8835	3.02906	4.37015e-140	2.02539e-138		NCAPG2	14.2609	3.27889	1.58295e-37	3.89153e-36		MGAT4C	34.5616	4.01723	2.61481e-221	1.06061e-219		CXCR4	72.34	2.21621	0	0		ENSSSCG00000038067	95.1727	2.92623	0	0		DCTN6	30.8861
SUCO	63.7003	1.47679	0	0		SLC16A12	228.381	3.89851	0	0		FRMD4A	106.615	4.07438	0	0		IGFBP2	27.8772	1.56325	1.85003e-140	8.60411e-139		NEGR1	14.2331	1.6789	1.90649e-37	4.65256e-36		NDFIP1	34.2594	0.864036	1.76847e-220	7.14059e-219		SERPINA1	72.2222	2.52041	0	0		ANXA10	95.1333	2.48218	0	0		MLXIPL	30.7363
UBE2E2	63.6433	1.63557	0	0		EEF2	226.942	1.33879	0	0		VLDLR	106.542	2.72437	0	0		DDX5	27.7473	1.36763	1.7519e-139	8.07724e-138		NEK2	14.2178	4.01014	2.41072e-37	5.85628e-36		IGFBP5	34.2183	1.463	1.15062e-218	4.59026e-217		ENSSSCG00000046891	71.9768	1.60917	0	0		UPF3A	94.7779	1.93784	0	0		PCYT1A	30.6896
HNRNPA3	63.6029	1.12142	0	0		ENSSSCG00000030849	224.987	1.88189	0	0		DSC2	106.265	2.54126	0	0		IDH2	27.6865	0.888513	2.24361e-139	1.03264e-137		H2AX	14.2063	2.22873	2.59483e-37	6.29778e-36		C6orf52	34.0637	1.5488	4.72885e-217	1.8725e-215		RAB11A	71.8898	1.22637	0	0		LSAMP	93.9183	1.56991	0	0		TUBA4A	30.5311
CRABP1	63.5563	6.04852	0	0		PTMA	224.193	1.28532	0	0		AMOTL2	105.781	3.63455	0	0		MEX3A	27.6328	2.42152	3.83958e-138	1.74908e-136		ENSSSCG00000008898	14.1449	1.50632	4.02126e-37	9.72438e-36		PAXX	33.994	0.744906	8.86194e-218	3.51955e-216		NRXN1	71.7309	2.03638	0	0		ENSSSCG00000004573	92.7369	2.54583	0	0		ENSSSCG00000002913	30.4921
ENSSSCG00000049534	63.472	1.41815	0	0		RPS28	221.539	1.64328	0	0		VEPH1	105.501	5.0038	0	0		BCL7C	27.6287	1.66704	2.39337e-138	1.09401e-136		KIF23	14.1164	3.103	6.19992e-37	1.49117e-35		JAZF1	33.7884	1.58068	3.79992e-214	1.48481e-212		CRYBA2	70.9578	2.07117	0	0		CHST9	92.6093	2.16457	0	0		AMIGO2	30.4531
RACK1	62.0419	0.451353	0	0		CRYZ	221.509	2.6501	0	0		SEMA3C	105.382	4.55626	0	0		ELL2	27.6254	1.24698	1.19622e-138	5.48675e-137		CENPH	14.0802	2.28883	8.50645e-37	2.0404e-35		ENSSSCG00000040498	33.6198	2.24262	1.12858e-211	4.35246e-210		CACNA2D1	70.429	1.53374	0	0		RAB2A	92.3231	0.976535	0	0		MDK	30.2662
PABPC1	61.1924	0.722157	0	0		RPS27L	221.289	2.07415	0	0		ENSSSCG00000050707	104.628	3.21938	0	0		CELF3	27.6122	1.9705	4.16349e-138	1.89339e-136		CDCA3	14.0328	3.86702	1.37961e-36	3.28849e-35		KLHL13	33.4892	1.691	1.25741e-210	4.8353e-209		CTSD	70.1051	1.34913	0	0		RFX3	91.8054	1.53107	0	0		SCN9A	30.2214
SLC16A12	61.1877	1.43614	0	0		ENSSSCG00000031838	220.865	1.43188	0	0		CD9	104.516	1.36565	0	0		IGFBPL1	27.5746	2.83683	1.28362e-137	5.76849e-136		CACNA2D1	14.0306	1.28583	1.20657e-36	2.87859e-35		GNAO1	33.4116	1.55291	4.21415e-210	1.6182e-208		ENSSSCG00000012238	69.8856	1.30258	0	0		PLD3	91.7545	1.35698	0	0		ENSSSCG00000048017	30.142
SLC25A3	60.5903	0.548225	0	0		RPL30	220.118	1.48147	0	0		ENSSSCG00000046054	104.318	5.16366	0	0		CNN3	27.4212	1.25009	5.38627e-137	2.40031e-135		ELOC	14.0155	1.0671	1.42771e-36	3.40009e-35		SPOCK1	33.3329	4.14108	4.21283e-208	1.60612e-206		SLC38A5	69.8146	1.5461	0	0		KIAA0408	91.717	1.97114	0	0		ILDR1	30.1339
PDZRN3	59.8921	1.72583	0	0		ENSSSCG00000036716	219.517	1.35092	0	0		SHISA3	103.674	6.20527	0	0		ENSSSCG00000048856	27.3648	0.500396	1.79323e-137	8.03157e-136		SNRPD1	13.962	0.902904	2.32831e-36	5.50063e-35		ENSSSCG00000032808	33.2434	1.44733	2.35536e-208	9.00544e-207		ENSSSCG00000007188	69.8131	1.21159	0	0		DYNLL1	91.6243	1.01626	0	0		MAST4	29.9189
ZFP36L1	59.6813	1.42104	0	0		ENSSSCG00000046239	217.457	4.21559	0	0		CCBE1	103.269	2.85291	0	0		NEUROD1	27.3396	1.7832	6.15587e-136	2.71153e-134		ENSSSCG00000008677	13.8949	3.69178	5.03218e-36	1.18465e-34		SLC18A1	33.225	5.91614	7.44742e-207	2.81512e-205		ENSSSCG00000014540	69.7265	0.385614	0	0		MAPRE3	91.5772	1.80146	0	0		SCOC	29.8703
FSCN1	59.6525	2.81717	0	0		A4GALT	216.778	3.82597	0	0		ENSSSCG00000001341	103.179	1.75992	0	0		SMARCD3	27.2708	1.60525	2.09873e-135	9.12384e-134		KPNA2	13.8325	2.97882	8.9508e-36	2.07875e-34		SERPINF2	33.2159	1.72049	9.45886e-208	3.59585e-206		TERF2IP	69.6043	1.19355	0	0		MIF	91.2555	0.646668	0	0		ENSSSCG00000034387	29.8559
QRICH1	59.3168	1.03508	0	0		ENSSSCG00000033310	211.131	1.20591	0	0		ROS1	101.982	2.3677	0	0		DSTN	27.2397	0.727338	7.37492e-136	3.24314e-134		SLC8A1	13.8026	1.42094	1.07461e-35	2.49236e-34		C1orf210	32.9107	1.31841	7.12535e-205	2.67442e-203		COX7A2	69.2478	0.675019	0	0		KIAA1549	91.2253	1.99785	0	0		DYNLT3	29.5458
A4GALT	59.1664	1.47907	0	0		BCAR1	208.093	3.09435	0	0		ENSSSCG00000038171	101.187	3.1402	0	0		HSPA8	27.2131	0.7457	1.71441e-135	7.48972e-134		MND1	13.7728	2.59853	1.54449e-35	3.57594e-34		CPE	32.7462	0.950897	7.31727e-206	2.7581e-204		ATP6V1F	69.247	1.08298	0	0		PPP1R1A	91.2234	2.11497	0	0		APOBEC2	29.4684
CCT3	59.0033	1.03566	0	0		PDCD4	206.025	2.61896	0	0		TESC	100.97	3.19115	0	0		HNRNPDL	27.2067	0.704127	1.59429e-135	6.97641e-134		KPNB1	13.7561	0.906983	1.58499e-35	3.66653e-34		NKX2-2	32.6947	1.19484	8.53686e-203	3.15532e-201		ENSSSCG00000012046	69.1339	1.22481	0	0		GNB2	90.9857	0.817838	0	0		OAZ1	29.421
OLFM3	58.8226	4.02177	0	0		TPT1	205.265	1.11861	0	0		COX7A1	100.892	1.85524	0	0		ENSSSCG00000009327	27.1397	0.578778	1.8575e-135	8.08833e-134		KIF5B	13.7539	0.992788	1.64103e-35	3.78631e-34		HYPK	32.6453	0.50182	1.03545e-203	3.84314e-202		SRI	69.1088	1.15485	0	0		JAZF1	90.8769	2.04881	0	0		HSPB8	29.2433
ENSSSCG00000050109	58.1957	5.87423	0	0		ENSSSCG00000037030	203.746	1.091	0	0		GSTA4	100.403	1.64275	0	0		ENSSSCG00000040498	27.1151	2.32992	6.13352e-134	2.61943e-132		TCF19	13.7464	4.29302	2.03631e-35	4.67405e-34		ENSSSCG00000014361	32.1381	0.830559	2.78378e-197	1.00658e-195		ST3GAL6	69.0035	1.47434	0	0		APLP1	90.7682	1.72564	0	0		C4BPB	29.2106
ENSSSCG00000046335	58.151	2.49827	0	0		SLC39A5	201.268	4.06117	0	0		KIT	100.146	2.633	0	0		ARL3	27.0644	0.859681	1.72278e-134	7.4049e-133		HNRNPA3	13.7153	0.84866	2.29678e-35	5.26283e-34		DUSP1	32.0427	1.22534	8.41261e-196	3.01733e-194		PSMD2	68.952	1.27287	0	0		DCTN3	90.5748	1.23028	0	0		YWHAH	29.1786
RBPMS	57.6062	2.04381	0	0		KARS1	199.973	1.825	0	0		SDC2	100.01	1.6769	0	0		RCOR2	27.0495	2.69372	2.49321e-133	1.05967e-131		UBE2S	13.7075	2.48061	2.85273e-35	6.51434e-34		CDK5R2	31.6998	2.17199	2.20935e-191	7.83982e-190		ATP5MG	68.4634	0.518062	0	0		OAZ1	90.4365	0.542788	0	0		NDFIP1	29.0742
RBPJ	57.0376	1.46482	0	0		EIF3G	199.861	1.79613	0	0		CHPT1	99.3706	1.79545	0	0		KDM7A	27.0409	3.06414	3.14096e-133	1.33074e-131		ENSSSCG00000040857	13.6766	0.868487	3.40674e-35	7.7595e-34		SLC8A1	31.4404	1.31111	1.41852e-189	5.0069e-188		SH3BGRL3	68.2313	1.02341	0	0		ENSSSCG00000013754	90.0688	1.95815	0	0		TSPAN3	28.9131
SUMO2	56.4147	0.537207	0	0		SNORD83A	194.692	2.09751	0	0		THBS1	98.7694	5.68868	0	0		SIM1	27.0266	2.07265	2.92451e-133	1.24101e-131		ENSSSCG00000026302	13.6686	3.49142	4.16167e-35	9.45475e-34		MESP1	31.1207	1.39257	6.99656e-186	2.43727e-184		MTMR7	68.1856	1.85187	0	0		ARL3	89.8846	1.0574	0	0		ELAVL4	28.8731
EIF3G	56.3459	0.687087	0	0		SLC25A6	191.978	1.02204	0	0		TST	98.6627	1.4185	0	0		DPYSL4	26.9605	4.65894	1.83058e-132	7.71885e-131		ILF2	13.6248	0.834649	5.36227e-35	1.21307e-33		MIF	31.0765	0.44778	2.34045e-187	8.19588e-186		SLC38A4	68.1662	3.30106	0	0		HMGCLL1	89.8289	3.75717	0	0		RAB3A	28.8205
ENSSSCG00000036114	56.2545	0.750207	0	0		CDKL1	191.925	4.40947	0	0		UCHL3	98.6345	1.85571	0	0		ENSSSCG00000028423	26.8458	0.87271	1.9646e-132	8.27089e-131		GGH	13.5989	1.12345	7.25102e-35	1.63203e-33		GNAI1	31.0652	1.36027	2.09854e-185	7.29127e-184		ENSSSCG00000012452	68.0144	1.33356	0	0		PEX5L	89.7606	2.22773	0	0		KIAA0408	28.6165
SELENOH	55.818	1.08483	0	0		NME2	191.76	1.54541	0	0		PIK3AP1	98.6167	4.18689	0	0		MARCKS	26.6455	0.704709	5.98228e-131	2.49096e-129		PRTFDC1	13.5882	1.74755	8.3883e-35	1.88482e-33		MAPRE3	30.1907	1.29771	2.10393e-176	7.07924e-175		ENSSSCG00000034387	67.8612	1.21911	0	0		SMARCA1	89.5579	1.49324	0	0		SIM1	28.5674
ATP2B1	55.6653	1.11628	0	0		NOP53	189.286	1.89544	0	0		MYO1B	98.3318	2.23115	0	0		RAB3D	26.6155	1.65494	4.06815e-130	1.68081e-128		PSMA7	13.5789	0.749712	8.45668e-35	1.89859e-33		CBLN1	29.8482	7.01639	6.0382e-172	1.97924e-170		FAH	67.8426	1.72694	0	0		CALB1	89.0528	4.14712	0	0		JUNB	28.5408
SNORA70-28	55.386	1.52893	0	0		P4HB	188.9	2.32197	0	0		CSRP1	98.2245	1.61723	0	0		AKR1A1	26.535	1.01	1.07415e-129	4.40383e-128		MAD2L2	13.5166	1.49316	1.60341e-34	3.5697e-33		ENSSSCG00000012517	29.7754	0.736597	5.24654e-176	1.75427e-174		STAT1	67.5982	1.50547	0	0		SLC22A17	88.8942	1.8887	0	0		PSMD2	28.5176
RPS15	55.3582	0.423083	0	0		ENSSSCG00000037775	188.699	5.54785	0	0		PICK1	97.7389	2.45676	0	0		APOA1	26.3739	1.93012	4.38845e-128	1.78274e-126		ISL1	13.5147	1.53235	1.57911e-34	3.51854e-33		ENSSSCG00000034019	29.7522	0.383617	1.87561e-173	6.18604e-172		ZEB1	67.3518	2.00312	0	0		DCX	88.8189	2.84272	0	0		ATP6V1F	28.4174
SLC2A2	55.039	3.07366	0	0		YBX3	188.319	3.87587	0	0		ENSSSCG00000044700	97.6802	3.19945	0	0		GSE1	26.3217	1.66002	1.11804e-127	4.52806e-126		SRSF7	13.4919	0.766188	1.85173e-34	4.11565e-33		POMT2	29.3814	1.79954	8.19929e-168	2.62624e-166		TMEM52	67.26	2.04926	0	0		RAB3B	87.9789	2.45081	0	0		RTN4	28.4153
SNRPG	54.989	0.866271	0	0		VIM	185.98	2.78607	0	0		LECT2	97.6483	4.30529	0	0		HNRNPA0	26.2993	0.827733	4.95112e-128	2.00826e-126		CDK4	13.481	1.08343	2.17246e-34	4.81247e-33		BEX3	29.3312	0.443172	2.66275e-169	8.59077e-168		C15orf48	67.242	1.63537	0	0		TERF2IP	87.7962	1.1731	0	0		SGTB	28.3572
SLC6A15	54.8817	2.19369	0	0		KLK1	185.547	4.5902	0	0		F3	97.3729	3.87042	0	0		TP53I11	26.1471	3.97866	5.95804e-126	2.36979e-124		PRKAR1A	13.4588	0.748831	2.44937e-34	5.39447e-33		UPF3A	29.3303	1.29145	1.00801e-167	3.2248e-166		ATP6V0B	67.2362	1.06512	0	0		GABARAPL2	87.3721	0.899201	0	0		ENSSSCG00000000576	28.3406
IGF2BP1	54.7727	2.25853	0	0		PABPC1	184.592	1.57893	0	0		ETS2	97.1349	2.43506	0	0		CHGB	26.108	2.4941	7.3764e-126	2.9252e-124		CDC45	13.4486	3.03494	3.20397e-34	7.02159e-33		NFASC	29.3012	2.27384	7.57406e-167	2.40001e-165		BEX4	67.1318	0.82848	0	0		FOXO1	87.263	1.89129	0	0		ENPP2	27.9624
ASAP3	54.7223	2.21819	0	0		ENSSSCG00000016998	181.013	1.34448	0	0		BCAM	96.9701	1.42194	0	0		MED21	26.0427	0.807928	5.80794e-126	2.31354e-124		SMC1A	13.4202	1.38939	3.92526e-34	8.57412e-33		ROBO1	29.2616	2.77131	2.74899e-166	8.69012e-165		HSBP1	66.191	0.801009	0	0		ENSSSCG00000048856	86.9988	0.632323	0	0		AAMP	27.9298
HBB	54.2375	2.40575	0	0		ENSSSCG00000003042	180.904	2.31426	0	0		PROX1	95.8496	1.67381	0	0		DNAJB6	26.0047	0.990694	1.99105e-125	7.86065e-124		SCG3	13.3942	1.40457	4.85281e-34	1.05656e-32		RBFOX1	29.2255	1.51647	1.50936e-166	4.77708e-165		SCAND1	66.0252	0.852883	0	0		NEGR1	86.601	2.04932	0	0		MYO6	27.8339
CCT5	54.1037	0.969967	0	0		ENSSSCG00000018197	178.073	2.13531	0	0		EXT1	95.5636	1.52796	0	0		PPP1R14B	25.9311	2.25076	2.05441e-124	8.02756e-123		MIS18A	13.3817	3.04168	5.95004e-34	1.28703e-32		LAMTOR4	29.1931	0.696794	6.97056e-167	2.21141e-165		COX17	65.4385	0.947016	0	0		ENSSSCG00000042464	86.4814	2.9303	0	0		TUBA1B	27.7086
AP1S2	53.9314	1.98947	0	0		ENSSSCG00000047299	175.58	2.07225	0	0		ENSSSCG00000004017	95.3689	3.0948	0	0		HNRNPA1	25.8024	0.656281	2.2832e-124	8.90851e-123		PCSK2	13.3611	1.18204	6.1958e-34	1.33802e-32		NKAIN2	29.004	2.97086	1.02622e-163	3.20606e-162		ENSSSCG00000039506	65.4309	0.588431	0	0		CHGB	86.1461	2.01635	0	0		SERPINA1	27.6105
ATP5PO	53.6568	0.636948	0	0		ENSSSCG00000002963	173.904	1.32386	0	0		ENSSSCG00000045892	95.3313	3.30163	0	0		PHLDA2	25.7025	2.37388	1.53965e-122	5.9378e-121		CKAP5	13.3568	2.08087	7.36375e-34	1.58639e-32		COX7A2	28.9962	0.460345	1.84381e-165	5.81487e-164		PTPRN2	65.2458	1.39637	0	0		ATP6AP2	86.0865	1.38881	0	0		TUBB2B	27.6063
TUBA1B	53.5945	0.985323	0	0		SNORD12C	173.075	2.05788	0	0		ENSSSCG00000040056	95.0563	1.67007	0	0		TRAF4	25.6446	1.55077	2.66722e-122	1.02567e-120		GEN1	13.3381	3.70799	9.01213e-34	1.93369e-32		SLC3A2	28.9766	1.03775	9.12214e-165	2.85995e-163		ATP6V1G1	64.9704	0.680813	0	0		ENSSSCG00000029160	85.967	1.28766	0	0		GNAO1	27.5862
DCTPP1	53.155	1.40031	0	0		ENSSSCG00000018620	171.002	2.19887	0	0		FTCD	94.3479	2.9174	0	0		ENSSSCG00000050649	25.5893	1.64786	5.77086e-122	2.21277e-120		RAN	13.3334	0.568946	7.87275e-34	1.69331e-32		ROS1	28.9347	1.5372	1.61441e-163	5.03186e-162		VPS37A	64.9604	2.14867	0	0		EMB	85.8441	1.90171	0	0		STK32A	27.5065
EIF3M	53.0546	1.02093	0	0		HSP90AB1	170.7	1.04798	0	0		ENSSSCG00000049534	94.1891	1.46772	0	0		CCDC115	25.4377	1.04576	5.55327e-121	2.11715e-119		NUDC	13.2972	1.0491	1.19507e-33	2.54983e-32		RPS28	28.6363	0.29998	7.00713e-165	2.19945e-163		CD47	64.9539	1.15483	0	0		CBX6	85.7365	1.37334	0	0		RAB3B	27.0875
SRSF3	52.879	0.791203	0	0		ENSSSCG00000029160	170.306	2.0025	0	0		CDH1	93.9743	1.44063	0	0		ATP6V1E1	25.3839	0.98429	1.62646e-120	6.1743e-119		PBK	13.2685	1.00935	1.56253e-33	3.32055e-32		EID1	28.6243	0.858919	3.16456e-161	9.7157e-160		SLC37A4	64.846	1.67634	0	0		ENSSSCG00000050754	85.3186	2.77308	0	0		SOX5	26.9408
FREM2	52.6546	2.17274	0	0		HSP90B1	168.284	1.60276	0	0		MAP3K1	93.5465	2.6673	0	0		PFDN2	25.3639	0.932158	2.28984e-120	8.66789e-119		RFC3	13.2465	1.80357	2.01692e-33	4.27257e-32		SNRPN	28.4191	0.763372	4.27758e-159	1.29981e-157		SLC35F3	63.8017	2.4276	0	0		ENSSSCG00000012560	85.3049	1.47029	0	0		SDCBP	26.8571
RPL29	52.5238	0.364307	0	0		BRI3	168.193	2.16099	0	0		SLC9A3R1	93.4498	1.97359	0	0		ROGDI	25.3	1.59988	1.48011e-119	5.57109e-118		HSP90AA1	13.243	0.559616	1.85155e-33	3.92851e-32		CRYBA2	28.4149	1.43479	1.5617e-158	4.73468e-157		PPP1R1A	63.4764	2.087	0	0		NOVA1	85.2834	1.57552	0	0		ENSSSCG00000040498	26.7461
COL9A1	52.4553	2.43182	0	0		ENSSSCG00000004912	167.319	1.90683	0	0		TMEM98	93.4472	1.40042	0	0		COX4I2	25.1966	1.93654	1.42611e-118	5.3452e-117		ENSSSCG00000036350	13.2162	0.601436	2.50866e-33	5.28484e-32		MGAM	28.4004	2.55302	7.46092e-158	2.24916e-156		HYPK	63.4667	0.647111	0	0		MTMR7	85.1172	1.72088	0	0		SH3BGRL3	26.684
HNRNPM	52.3266	0.847237	0	0		SUCO	166.315	2.66747	0	0		AIF1L	93.3335	2.95617	0	0		ELAPOR1	25.1529	1.64859	2.1939e-118	8.19991e-117		UBE2T	13.1887	3.19163	3.56892e-33	7.47118e-32		NKX6-1	28.3328	1.45627	1.40172e-157	4.22085e-156		SMIM5	63.4291	1.12507	0	0		CERKL	85.0034	2.49357	0	0		STPG4	26.6361
RPS20	52.2999	0.357959	0	0		RNASE1	166.22	5.00095	0	0		PTPRF	93.1986	1.26902	0	0		MAST4	25.0765	1.00662	3.62792e-118	1.35217e-116		FEN1	13.1488	2.38875	5.07242e-33	1.05605e-31		ADCY1	28.2915	1.8125	5.04539e-157	1.50734e-155		PMM2	63.2112	1.58943	0	0		RUNDC3A	84.6655	2.0212	0	0		FAM162B	26.4853
EIF3L	51.8913	0.750391	0	0		ENSSSCG00000031177	164.837	5.86129	0	0		QKI	92.9645	1.70546	0	0		GSTA4	24.9036	1.11977	1.13601e-116	4.16416e-115		MYO5A	13.0319	0.929013	1.34521e-32	2.7597e-31		RFX6	28.2197	1.58574	1.90081e-156	5.63456e-155		TM4SF5	63.1259	3.40796	0	0		SCN9A	83.9944	1.97561	0	0		GNAI1	26.4047
SERPINH1	51.7644	1.59242	0	0		RAB36	162.97	1.66257	0	0		ssc-mir-30a	92.1893	3.7008	0	0		ENSSSCG00000011489	24.7876	1.52801	1.46548e-115	5.32791e-114		BUB3	13.0051	1.38551	1.82366e-32	3.73263e-31		CXXC4	28.2186	1.04343	8.80164e-157	2.62366e-155		TBCA	62.9118	0.617656	0	0		SMS	83.3656	1.08056	0	0		SERPINI1	26.3701
CBX3	51.7185	1.02385	0	0		SNRPD2	159.43	1.16449	0	0		CD44	91.9765	3.75376	0	0		SCARB2	24.4794	1.34063	3.53161e-113	1.25485e-111		PPM1E	12.9906	2.36127	2.15887e-32	4.40182e-31		GNB2	28.2038	0.559867	2.17413e-157	6.51725e-156		NCOA7	62.8016	2.21583	0	0		MPZL1	83.2286	1.24661	0	0		ENSSSCG00000042146	26.2
OPCML	51.6364	2.58056	0	0		MAMDC4	158.726	1.48243	0	0		SGK1	91.7826	5.10881	0	0		GAPDH	24.3856	0.536539	3.60231e-113	1.27827e-111		LSM6	12.9866	1.30969	2.13433e-32	4.35845e-31		QSOX1	28.1422	1.19139	5.32032e-156	1.57185e-154		NDUFA1	62.7829	0.915063	0	0		PTPRN2	82.9402	1.39722	0	0		ENSSSCG00000032060	26.0324
HDAC2	51.4796	1.02216	0	0		SEC61G	158.616	1.39049	0	0		RASL11A	91.2357	4.40505	0	0		ILF2	24.3526	0.810872	1.68958e-112	5.97157e-111		CENPS	12.9772	1.89576	2.407e-32	4.8965e-31		IMMP1L	28.04	0.831909	3.17545e-155	9.31966e-154		VPS28	62.4649	0.932177	0	0		SLC34A3	82.908	2.28051	0	0		SNRPN	25.9652
RPL10	51.3479	0.534859	0	0		KRTCAP2	157.744	1.3346	0	0		LRATD1	90.8906	3.58993	0	0		CD81	24.2367	1.08576	2.68696e-111	9.40929e-110		ASB9	12.9609	1.25843	2.5562e-32	5.19209e-31		CNTN3	28.0252	1.59771	1.63875e-154	4.77802e-153		RAB9B	62.4278	3.52941	0	0		GNAO1	82.8613	1.85422	0	0		ELL2	25.9518
FBLN1	50.8819	2.44558	0	0		SLC22A23	157.533	2.59138	0	0		MAML2	90.477	1.09519	0	0		SMS	24.1739	0.921835	5.17885e-111	1.8088e-109		CBX5	12.8597	1.03578	6.67479e-32	1.33641e-30		ITPK1	27.9511	1.97914	1.27215e-153	3.69297e-152		NOP10	62.4041	0.776345	0	0		KDELR3	82.7676	0.895753	0	0		JAK1	25.9417
GAP43	50.5092	2.15815	0	0		TMEM223	157.254	1.6154	0	0		LIMCH1	89.7961	1.64032	0	0		CNTN3	24.0487	1.76618	1.04829e-109	3.60927e-108		SUMO2	12.8475	0.506106	7.23982e-32	1.44842e-30		NDUFA1	27.8318	0.682917	2.40525e-153	6.96713e-152		FAM199X	62.3045	1.78209	0	0		CHIA	82.698	1.49942	0	0		ARPP21	25.8408
ENSSSCG00000008659	50.4256	0.759278	0	0		ENSSSCG00000018063	154.389	1.32396	0	0		PRTFDC1	89.7104	2.22279	0	0		ELAVL1	23.97	1.05433	2.72158e-109	9.35319e-108		DNMT1	12.8395	1.57756	8.35393e-32	1.66635e-30		PDE1C	27.8269	3.43077	3.70267e-152	1.06099e-150		ENSSSCG00000026414	62.2083	0.624473	0	0		DSTN	82.0963	0.75359	0	0		VPS28	25.8386
SNRPD2	50.39	0.481072	0	0		OSTC	152.878	1.76908	0	0		ST6GAL1	89.6559	3.26603	0	0		YWHAZ	23.9496	0.843638	2.72358e-109	9.35319e-108		ENSSSCG00000028092	12.8153	1.1448	9.8116e-32	1.95418e-30		STARD10	27.8021	0.959497	1.0805e-152	3.11289e-151		ENSSSCG00000008012	61.7232	1.39808	0	0		ENSSSCG00000028092	82.0877	1.4447	0	0		SLC8A1	25.8186
TST	50.118	1.0197	0	0		ENSSSCG00000001551	152.579	5.85692	0	0		KLHDC7A	89.3507	5.03614	0	0		SNRPG	23.8894	0.706982	5.79126e-109	1.96851e-107		RHNO1	12.8107	2.91682	1.13413e-31	2.24876e-30		TRPC5	27.7845	1.98825	5.41588e-152	1.55025e-150		NIT2	61.5418	1.1854	0	0		BEX3	81.9158	0.608259	0	0		RUNDC3A	25.7972
PKIB	50.0303	1.02002	0	0		RFXANK	151.688	2.7002	0	0		ACER3	89.2759	2.06158	0	0		CCDC181	23.7794	1.14607	8.09041e-108	2.71538e-106		ENSSSCG00000011000	12.8004	0.745411	1.1045e-31	2.19491e-30		ENSSSCG00000007336	27.7584	1.66889	6.24514e-152	1.78569e-150		HSPA8	61.5142	0.714578	0	0		SCG3	81.8901	1.79438	0	0		MESP1	25.6146
ENSSSCG00000005656	49.9197	0.798674	0	0		EGF	150.887	6.26087	0	0		ACSF2	89.1836	2.88363	0	0		TM7SF2	23.7007	1.57547	4.69593e-107	1.56427e-105		VRK1	12.7744	2.57702	1.56658e-31	3.09472e-30		MARCKSL1	27.7275	0.529386	6.79496e-153	1.96185e-151		SELENOT	61.4256	0.994287	0	0		ENSSSCG00000034387	80.8814	1.12892	0	0		UNC80	25.6012
ENSSSCG00000035768	49.8152	0.411313	0	0		ANPEP	149.848	3.20277	0	0		TFPI2	88.6803	4.69814	0	0		CNOT7	23.6678	1.07631	5.77982e-107	1.92293e-105		RBBP7	12.7718	1.2073	1.51538e-31	2.99803e-30		RGS2	27.6673	1.82863	6.77359e-151	1.92031e-149		SMARCD3	61.2989	1.58191	0	0		FHL1	80.7017	4.06459	0	0		ENSSSCG00000011489	25.513
RPS12	49.8073	0.395918	0	0		HHIP	149.427	3.48247	0	0		GRM7	88.3807	4.54287	0	0		CHGA	23.4876	1.58434	9.78466e-106	3.22313e-104		APLP1	12.7637	1.15786	1.57477e-31	3.10859e-30		DAZAP1	27.6177	0.429429	1.10641e-151	3.15008e-150		WLS	61.2903	1.7424	0	0		RHBDD2	80.6311	1.36682	0	0		MAPRE2	25.4874
NDUFA4	49.7586	0.687703	0	0		CCKAR	148.315	3.28423	0	0		NRTN	88.2185	3.84748	0	0		CELSR2	23.4731	2.22943	3.38782e-105	1.1064e-103		LSAMP	12.7454	1.16784	1.8773e-31	3.69758e-30		ANKRD46	27.5228	1.17633	8.38095e-150	2.37096e-148		GRIK1	61.175	3.36923	0	0		ATP6V0D1	80.3916	1.34491	0	0		C5orf49	25.48
POLE4	49.7122	0.962873	0	0		HSPE1	146.553	1.19024	0	0		ENSSSCG00000046335	87.9579	2.95111	0	0		BTBD3	23.4592	1.5761	3.33157e-105	1.08936e-103		TPI1	12.6801	0.833382	3.33368e-31	6.5323e-30		GABRB3	27.3445	3.16749	1.48672e-147	4.16174e-146		QSOX1	61.1723	1.53965	0	0		RAB5A	80.0225	1.09372	0	0		PRLHR	25.3997
TCIM	49.5062	2.22852	0	0		ENSSSCG00000018067	146.455	1.99704	0	0		C1orf21	87.6171	2.1583	0	0		ENSSSCG00000028322	23.4278	0.965802	2.76515e-105	9.05264e-104		ENSSSCG00000035836	12.6623	0.80317	3.99823e-31	7.80006e-30		CDH17	27.3196	1.78591	1.14503e-147	3.20862e-146		ENSSSCG00000027746	61.1422	0.739332	0	0		PPM1E	79.933	3.41733	0	0		ENSSSCG00000037142	25.3286
RASSF8	49.407	1.67231	0	0		FAU	146.055	1.47507	0	0		HOMER1	87.529	2.32557	0	0		ASPDH	23.4204	1.49531	7.1097e-105	2.31621e-103		ECT2	12.6518	3.13082	4.81396e-31	9.33678e-30		KIF12	27.2347	1.26124	5.50333e-147	1.5373e-145		ENSSSCG00000012541	60.2731	3.20243	0	0		GPR160	79.8005	1.72199	0	0		ENSSSCG00000051070	25.2591
HSPD1	49.4046	0.840699	0	0		ENSSSCG00000037620	146.043	6.32035	0	0		GATA6	87.2579	1.85346	0	0		EPB41	23.3949	1.61039	1.05743e-104	3.43234e-103		PCSK1N	12.6361	0.862405	4.64809e-31	9.02162e-30		RPH3AL	27.1891	1.19599	1.16371e-146	3.24731e-145		GRM4	60.2398	2.77285	0	0		ENSSSCG00000021374	79.6555	1.99887	0	0		MID1IP1	25.2445
RORA	49.3613	0.760287	0	0		RPL32	145.2	1.45195	0	0		ENSSSCG00000038594	87.1977	2.12931	0	0		SRSF3	23.3566	0.641919	7.74452e-105	2.51995e-103		CCNB1	12.6278	3.54786	6.01857e-31	1.1614e-29		RIMS2	27.174	1.55484	2.83488e-146	7.86126e-145		NKX2-2	60.1246	1.29739	0	0		CCDC88A	79.3032	1.73167	0	0		VWA5B2	25.1516
FUS	49.2773	0.905406	0	0		MGAT4A	144.733	1.61394	0	0		PRPSAP1	87.13	2.1069	0	0		FAM20C	23.2846	1.38032	6.46088e-104	2.07942e-102		MCM6	12.6276	1.74864	5.8023e-31	1.12047e-29		SLC35F3	27.1613	1.75972	4.34748e-146	1.20183e-144		ENSSSCG00000013232	59.6204	1.12181	0	0		CPLX2	79.1143	1.81481	0	0		TMEM130	25.0936
ERH	49.1677	0.647922	0	0		BCAS1	144.608	5.27319	0	0		PCDH17	86.7499	2.44993	0	0		VPS37A	23.2681	1.68343	1.02038e-103	3.2801e-102		TPM4	12.6044	1.1665	6.91326e-31	1.33115e-29		NEURL1	27.1142	1.18596	6.91689e-146	1.91014e-144		IMMP1L	59.4738	1.0366	0	0		PREB	78.391	1.86362	0	0		ENSSSCG00000048608	25.0803
ATIC	48.8112	1.5856	0	0		MECOM	144.605	4.02577	0	0		COL9A1	86.4579	3.30289	0	0		LRRC49	23.1329	2.47856	1.41668e-102	4.50513e-101		TEX30	12.6033	2.53971	7.39871e-31	1.42257e-29		ROMO1	27.0811	0.562809	3.15674e-146	8.7356e-145		YWHAH	59.113	1.09855	0	0		TMEM130	78.3277	2.82091	0	0		PRPF6	25.0035
KHDRBS1	48.725	0.903179	0	0		EIF3E	143.669	1.39744	0	0		LAMA1	86.2844	4.01522	0	0		TTYH2	23.1035	1.36907	1.74055e-102	5.51533e-101		DDX39A	12.5755	1.96134	9.37986e-31	1.79186e-29		SLC7A8	27.0311	1.27561	2.58875e-145	7.11214e-144		EGFL7	59.0519	2.00207	0	0		PRNP	78.1759	1.48579	0	0		FAM177A1	24.9047
MSI2	48.4429	0.961944	0	0		EIF3L	143.55	1.47582	0	0		RBMS1	85.978	1.568	0	0		KLHL32	23.0457	1.79211	5.25757e-102	1.65613e-100		DACH1	12.5736	0.855583	8.47314e-31	1.62213e-29		DYNLRB1	26.8702	0.703077	5.84117e-144	1.59163e-142		ATP6V0D1	58.534	1.25057	0	0		FYN	77.963	1.96383	0	0		NR4A2	24.8806
VTN	48.3127	1.54226	0	0		ENSSSCG00000036119	143.532	4.94715	0	0		NTN4	85.836	3.27529	0	0		HSP90AB1	22.8969	0.468235	2.34974e-101	7.36685e-100		RACGAP1	12.5217	3.05587	1.56069e-30	2.9497e-29		PENK	26.8612	5.94408	8.02561e-143	2.18017e-141		SGTB	58.2656	2.09156	0	0		NOL4	77.937	1.59875	0	0		MT3	24.7723
DUT	47.9537	1.12734	0	0		RABGAP1L	143.124	2.28522	0	0		SLC25A12	85.64	1.71296	0	0		KDSR	22.8263	1.37826	2.21219e-100	6.83907e-99		ENSSSCG00000035293	12.5202	1.00321	1.18564e-30	2.25366e-29		NECTIN3	26.6977	1.12514	6.24385e-142	1.68755e-140		GPC6	58.2241	2.85481	0	0		SYT7	77.7691	2.73129	0	0		BAIAP3	24.7308
BRINP2	47.9473	2.87931	0	0		VTN	142.574	3.79413	0	0		GGH	85.4164	1.25298	0	0		GFRA1	22.7873	3.5571	6.68828e-100	2.05578e-98		ENSSSCG00000021591	12.3766	0.735508	5.1385e-30	9.54923e-29		CERKL	26.6782	1.60164	1.45965e-141	3.92912e-140		GPD1	58.1037	0.884111	0	0		PRKAR1A	77.7405	0.902689	0	0		STMN1	24.7283
NOP53	47.8348	0.723597	0	0		ENSSSCG00000039963	141.689	2.32467	0	0		CCND1	85.3718	3.09609	0	0		ARHGAP9	22.7052	5.38502	3.04004e-99	9.24818e-98		GINS1	12.3699	2.32839	6.02873e-30	1.11958e-28		KRT7	26.6764	1.23009	7.50962e-142	2.02555e-140		MINDY1	57.7873	1.41788	0	0		MORF4L1	77.712	0.923	0	0		ENSSSCG00000038713	24.5581
SNRPD1	47.7779	0.850321	0	0		PABPN1	140.605	1.39957	0	0		ENSSSCG00000039506	85.2999	0.627589	0	0		VWA5B2	22.6777	1.86367	3.18737e-99	9.68533e-98		LSM8	12.3199	1.103	9.04693e-30	1.67077e-28		LRRN2	26.6252	2.51425	8.27285e-141	2.22241e-139		DCTN3	57.6071	1.0283	0	0		TP53I13	77.6925	1.39729	0	0		ENSSSCG00000012520	24.46
NES	47.7101	4.41206	0	0		ENSSSCG00000041434	139.66	2.42449	0	0		IQGAP1	84.7423	1.79322	0	0		MGST1	22.6647	1.25981	2.62006e-99	7.98879e-98		RHEB	12.2643	0.874046	1.44596e-29	2.64835e-28		FGF14	26.5568	2.64359	3.86891e-140	1.03621e-138		GADD45A	57.2974	1.46283	0	0		NDST3	77.6689	4.28503	0	0		COX7A2	24.3551
TEAD2	47.6092	1.43579	0	0		SERP1	139.467	1.80498	0	0		SFRP5	84.7135	5.22249	0	0		FNBP1L	22.6289	1.3169	5.97884e-99	1.80646e-97		ROBO2	12.1999	1.387	2.61783e-29	4.74899e-28		ABCA5	26.4851	1.39773	9.10463e-140	2.43359e-138		IGFBP1	57.1626	2.74854	0	0		ENSSSCG00000025499	77.2833	2.87749	0	0		ENSSSCG00000035525	24.3309
AKR1B1	47.5843	1.25808	0	0		PPIB	138.152	1.13377	0	0		SCRN1	84.624	1.60706	0	0		SNRPN	22.5957	0.785704	5.8192e-99	1.76022e-97		ZNF367	12.1966	3.42346	2.897e-29	5.24472e-28		TOMM7	26.4828	0.606646	2.46232e-140	6.60144e-139		DYNLRB1	57.1503	0.85617	0	0		C15orf48	77.2127	1.40906	0	0		RFX2	24.3247
PAICS	47.5643	1.83473	0	0		NANS	137.516	1.25972	0	0		CLDN10	84.4523	1.16263	0	0		DCTN6	22.5949	1.15516	9.26963e-99	2.79441e-97		ENSSSCG00000039071	12.1899	0.977627	2.86951e-29	5.19848e-28		GNB5	26.4663	1.56759	1.56073e-139	4.15918e-138		ROGDI	57.026	1.65757	0	0		ATP6V1F	77.1529	0.952114	0	0		ENSSSCG00000031023	24.2786
RPL26	47.4823	0.32252	0	0		QRICH1	136.963	1.69719	0	0		CDC42EP1	84.441	3.49415	0	0		ENSSSCG00000033987	22.5407	0.812071	1.79274e-98	5.374e-97		PSMD14	12.1388	1.26416	4.57296e-29	8.18983e-28		LGALS2	26.4066	1.87689	6.6889e-139	1.77189e-137		PEPD	56.9744	1.41086	0	0		MCRIP1	77.0322	1.03478	0	0		ENSSSCG00000001229	24.2607
ATP5F1B	47.3988	0.578405	0	0		GAMT	134.954	2.07882	0	0		ANXA9	83.7259	4.65951	0	0		ENSSSCG00000014031	22.53	0.98399	2.36564e-98	7.08335e-97		ZEB1	12.132	1.55013	4.92705e-29	8.80033e-28		SLC25A53	26.2938	1.46385	5.16369e-138	1.3611e-136		SNCG	56.8483	3.83442	0	0		DPP10	76.613	2.37481	0	0		UPF3A	24.2137
ENSSSCG00000007978	47.3757	2.86278	0	0		MRPL12	134.745	1.53774	0	0		EFHC2	83.5085	3.77393	0	0		SMIM5	22.5127	0.901413	2.7994e-98	8.37276e-97		CENPA	12.1114	3.96818	6.21923e-29	1.10935e-27		TLE5	26.1627	0.752564	3.85948e-137	1.00934e-135		SKP1	56.7972	0.622199	0	0		ENSSSCG00000037376	76.4726	1.97946	0	0		MAPRE3	24.1832
SERBP1	47.3302	0.585486	0	0		COL1A2	134.688	3.8123	0	0		PLPP2	83.3145	3.32498	0	0		SCN3A	22.4831	2.64238	1.12327e-97	3.3334e-96		KIF22	12.1072	1.90433	6.26047e-29	1.11596e-27		SLC16A10	26.044	1.27564	1.02038e-135	2.63744e-134		SERPIND1	56.6823	2.77611	0	0		ATP6V0B	76.0892	0.938829	0	0		DKKL1	24.1582
LARGE1	47.2644	2.42051	0	0		ENSSSCG00000019600	134.659	2.0111	0	0		SERPING1	82.5918	2.19196	0	0		DYNLL1	22.2592	0.747079	1.70464e-96	5.02511e-95		ENSSSCG00000004782	12.0734	3.46461	8.67904e-29	1.53589e-27		KRT10	26.0029	0.730561	1.09343e-135	2.82354e-134		ENSSSCG00000039222	56.6371	1.47355	0	0		DLC1	75.8927	3.34686	0	0		FAM3C	24.0706
ENSSSCG00000033189	47.2556	4.06583	0	0		SNORD35B	132.774	2.01609	0	0		CPD	82.4298	1.38406	0	0		SRGAP1	22.2481	2.53438	6.16511e-96	1.80147e-94		CDCA8	12.051	3.72317	1.06073e-28	1.87202e-27		ANKS1B	25.9899	4.34989	1.02121e-134	2.61424e-133		LRP11	56.5658	2.08464	0	0		RAP1B	75.8042	1.12059	0	0		ENSSSCG00000002891	23.9901
HBE1	46.7279	4.65161	0	0		RPL7A	132.174	1.68984	0	0		C17orf67	82.2824	5.68708	0	0		DCTN3	22.1886	0.890792	7.50929e-96	2.19184e-94		HAUS1	12.0288	1.58152	1.2447e-28	2.18944e-27		UCHL1	25.9647	0.957106	2.08279e-135	5.36792e-134		UPF3A	56.5323	1.48229	0	0		TMEM176A	75.4129	1.54737	0	0		B2M	23.8822
TENM3	46.6869	1.67171	0	0		TMSB4X	131.938	1.136	0	0		ENSSSCG00000010073	81.9637	1.16647	0	0		CBX1	22.1642	1.32727	1.71186e-95	4.98028e-94		ORC6	11.9759	2.15001	2.02396e-28	3.53219e-27		RUNDC3A	25.9258	1.33313	1.30278e-134	3.33185e-133		SELENOF	56.3785	0.782966	0	0		LY6H	75.1387	2.09623	0	0		MEIS2	23.8586
RCN2	46.4749	1.06741	0	0		PLP2	131.234	1.62767	0	0		CTNNB1	81.8208	1.00738	0	0		IP6K2	22.1526	1.09863	1.79098e-95	5.20479e-94		KIF4A	11.938	3.66072	2.88483e-28	5.00832e-27		CARHSP1	25.9049	0.540708	6.04291e-135	1.54844e-133		CRYL1	56.3006	1.22173	0	0		TNIK	74.9891	1.77451	0	0		USH1C	23.7172
FMNL2	46.4311	1.5224	0	0		PRDX5	130.867	1.37842	0	0		ERRFI1	81.682	1.71634	0	0		MAML3	22.1399	1.08426	2.23515e-95	6.48851e-94		ENSSSCG00000013052	11.9187	0.929313	3.16452e-28	5.48317e-27		TMEM179	25.7924	1.82861	3.56035e-133	9.03616e-132		ENSSSCG00000007336	55.9992	2.05557	0	0		APP	74.9335	0.905171	0	0		ENSSSCG00000012238	23.6878
SNORD35B	46.3468	1.0332	0	0		ACSS3	130.383	2.7032	0	0		LTO1	81.5737	1.77577	0	0		AKAP9	22.0086	0.728809	1.48097e-94	4.26202e-93		MANF	11.9035	0.786855	3.56535e-28	6.16968e-27		SLC16A14	25.7682	2.7817	8.82852e-133	2.22164e-131		RFX6	55.9703	1.89259	0	0		HDAC6	74.8301	1.5791	0	0		FOS	23.6445
EIF3I	46.3179	0.909397	0	0		PDIA4	130.058	1.7307	0	0		CLDN22	81.4604	3.52263	0	0		ITGA7	21.9409	5.16185	1.41673e-93	4.01216e-92		NRXN1	11.8977	1.39941	3.88814e-28	6.71953e-27		STPG4	25.7059	0.351608	1.14856e-133	2.92061e-132		SERPINF2	55.908	1.77197	0	0		ENSSSCG00000034415	74.6598	0.783143	0	0		REV3L	23.6336
PRDX6	46.225	1.1662	0	0		PPM1K	129.429	3.39288	0	0		IDH1	81.3775	2.1046	0	0		SSBP3	21.8629	1.07462	2.54542e-93	7.18569e-92		CENPN	11.8719	3.6833	5.16893e-28	8.87544e-27		ENSSSCG00000039222	25.6904	1.10871	1.43848e-132	3.60962e-131		RUNDC3A	55.8619	1.69258	0	0		HOGA1	74.5701	1.74105	0	0		ENSSSCG00000051044	23.6327
ENSSSCG00000014031	46.1971	1.04798	0	0		ST3GAL1	128.188	2.71396	0	0		ADAMTS18	81.3641	3.32699	0	0		PTP4A1	21.8628	1.04768	2.48854e-93	7.03257e-92		MORF4L1	11.867	0.772406	4.91911e-28	8.46284e-27		H3-3B	25.671	0.283299	5.79585e-133	1.46263e-131		C6orf52	55.8188	1.61981	0	0		PLAGL1	74.3254	2.55568	0	0		CELF3	23.55
ENSSSCG00000010440	46.1078	1.45065	0	0		ND6	127.238	1.8185	0	0		ANXA13	81.3277	5.50839	0	0		NCBP2	21.8156	0.870872	4.88516e-93	1.37471e-91		EID1	11.8519	0.888504	5.59636e-28	9.59082e-27		TERF2IP	25.6482	0.766523	2.00752e-132	5.02804e-131		ATP6AP2	55.7937	1.15635	0	0		MRPS33	74.2901	1.1242	0	0		SEMA6A	23.4596
PRPF40A	46.0333	0.972144	0	0		SORD	127.075	2.4111	0	0		HABP2	80.9585	2.81657	0	0		ENSSSCG00000007336	21.7752	1.6495	1.38854e-92	3.87469e-91		KCNK16	11.8377	1.12916	6.36649e-28	1.08687e-26		RET	25.6403	2.40668	1.1455e-131	2.85293e-130		DYNLT1	55.6497	0.932792	0	0		CCND3	74.2073	1.58141	0	0		ATP6V0B	23.4429
ENSSSCG00000021560	45.959	0.872648	0	0		ARHGDIB	126.932	5.59057	0	0		ADCY6	80.5907	1.92446	0	0		METTL9	21.7726	1.17719	1.27818e-92	3.57422e-91		ENSSSCG00000012238	11.8189	0.864396	7.42402e-28	1.26498e-26		ST6GALNAC5	25.6243	3.98856	2.30121e-131	5.71527e-130		ENSSSCG00000002891	55.6379	1.528	0	0		CADM2	74.195	4.34871	0	0		SYBU	23.3622
PDE3A	45.9108	1.97725	0	0		EGFL8	125.776	2.16589	0	0		AGRN	80.5868	2.30004	0	0		COL6A2	21.7693	1.50292	1.65513e-92	4.61377e-91		PPP1R1A	11.7999	1.43574	9.24962e-28	1.56902e-26		OAZ1	25.6232	0.325378	7.96699e-133	2.00673e-131		ROBO2	55.6357	1.66959	0	0		PKIG	73.9174	1.53536	0	0		AGTR1	23.3532
KIRREL2	45.8426	2.79044	0	0		ENSSSCG00000032942	124.775	2.65819	0	0		PALMD	80.2964	2.92183	0	0		MTF2	21.7608	0.955605	1.29966e-92	3.63047e-91		NOVA1	11.7845	1.17629	1.05076e-27	1.77901e-26		ATP6V1E1	25.4864	0.781678	8.21014e-131	2.02585e-129		DSTN	55.6299	0.670397	0	0		RIMBP2	73.8912	2.02068	0	0		KRT8	23.2037
RPS27A	45.7917	0.285369	0	0		FABP5	124.368	3.45277	0	0		IL18	79.762	4.16141	0	0		CIAO2B	21.7103	0.99567	3.1795e-92	8.8353e-91		UHRF1	11.7782	2.42598	1.15969e-27	1.95971e-26		ENSSSCG00000032060	25.4701	1.00627	1.60872e-130	3.95851e-129		SMARCA1	55.2507	1.19485	0	0		RBFOX1	73.6642	1.8771	0	0		COX4I2	23.1795
RBPJL	45.7444	0.993766	0	0		NR2C2AP	123.749	3.43363	0	0		OSBPL3	79.0001	2.74273	0	0		CDK2AP1	21.6918	1.51683	5.94096e-92	1.64575e-90		RFC2	11.7623	1.08758	1.28733e-27	2.16716e-26		NOP10	25.4595	0.537202	8.28082e-131	2.0414e-129		ITPR1	55.1195	2.02658	0	0		NUDT16	73.4599	1.44054	0	0		YWHAQ	23.0785
ENSSSCG00000007088	45.5956	0.940321	0	0		GSTO1	123.693	1.70507	0	0		ENSSSCG00000047545	78.9861	2.87995	0	0		ERH	21.6826	0.526835	3.1213e-92	8.68264e-91		ARHGEF39	11.7622	3.75501	1.35908e-27	2.28649e-26		CSTB	25.431	0.6028	1.51955e-130	3.74257e-129		COL26A1	55.0288	2.40318	0	0		KCNA4	73.4167	4.85557	0	0		DYNLT1	23.0482
COPG2	45.3211	1.48359	0	0		TMEM97	123.53	1.99735	0	0		ENSSSCG00000010056	78.8968	1.9298	0	0		KIT	21.5915	1.97159	4.09595e-91	1.12878e-89		PLK1	11.7555	3.61994	1.43855e-27	2.41867e-26		SLCO3A1	25.2487	1.87596	3.64087e-128	8.8045e-127		FKBP1B	54.8211	1.89449	0	0		DYNLRB1	73.0489	0.849155	0	0		ACTC1	22.945
TMEM98	45.291	1.00694	0	0		PTF1A	121.967	4.36178	0	0		FUNDC1	78.8455	1.39714	0	0		CCDC88A	21.5586	1.37576	5.13809e-91	1.41305e-89		ENSSSCG00000031741	11.716	3.38029	2.02846e-27	3.38912e-26		CDC42EP5	25.0377	0.86483	1.01848e-126	2.44298e-125		RPH3AL	54.646	1.40508	0	0		MAP2	72.4294	1.28019	0	0		CER1	22.9405
EFNA4	45.2629	1.77273	0	0		EIF3F	121.747	1.81051	0	0		LHFPL2	78.7991	2.34987	0	0		TIMM17A	21.5505	1.4095	6.19165e-91	1.70105e-89		CDCA4	11.7016	1.49335	2.21807e-27	3.69896e-26		MAPRE2	24.9022	1.11985	2.84616e-125	6.78419e-124		SCP2	54.5794	0.790785	0	0		TSHZ1	72.4281	1.36681	0	0		ENSSSCG00000033807	22.7269
ENSSSCG00000012703	45.1718	0.878733	0	0		MYC	121.33	3.46876	0	0		WWC2	78.5829	3.72369	0	0		RPRM	21.5463	4.8498	1.08859e-90	2.97843e-89		CDKN2C	11.6915	2.98555	2.51371e-27	4.17369e-26		SLC22A17	24.8949	1.15641	3.15949e-125	7.51761e-124		HMGN3	54.4049	0.560399	0	0		FAM20A	72.3945	2.47397	0	0		ENSSSCG00000012527	22.6877
PRDX2	44.8532	0.523467	0	0		ENSSSCG00000038364	120.964	1.13117	0	0		EPHX1	78.2131	1.58356	0	0		BZW1	21.5403	0.870259	4.98443e-91	1.37221e-89		DYNLT1	11.6599	0.794812	3.04651e-27	5.03487e-26		PCBD1	24.8854	0.619852	1.96744e-125	4.70227e-124		JAZF1	54.3862	1.56287	0	0		DPYD	72.1724	1.17149	0	0		PPY	22.6305
ENSSSCG00000032552	44.6348	1.32034	0	0		ENSSSCG00000018061	120.109	1.62333	0	0		SDCBP	78.15	1.0627	0	0		ELAVL4	21.526	1.64315	1.02874e-90	2.82046e-89		TUBG1	11.6468	1.5631	3.62101e-27	5.94189e-26		NPC2	24.8698	0.943653	4.78016e-125	1.13637e-123		RAB2A	54.2975	0.765747	0	0		MAPRE2	72.0671	1.4681	0	0		SULF2	22.5718
ENSSSCG00000002972	44.5776	1.35112	0	0		MT1X	119.686	3.27272	0	0		CAV2	78.0965	5.09108	0	0		MAD2L2	21.5012	1.35926	1.39471e-90	3.80815e-89		CENPW	11.646	3.2395	3.74163e-27	6.12098e-26		MINDY1	24.8274	1.05595	1.31179e-124	3.10737e-123		A1CF	54.1966	2.01426	0	0		ENSSSCG00000038713	71.978	1.64159	0	0		ANXA4	22.5678
GAS2	44.4967	1.20669	0	0		EIF4B	118.703	1.34753	0	0		ENSSSCG00000031661	77.549	1.053	0	0		BLOC1S1	21.3868	0.756182	6.83673e-90	1.861e-88		CNTN1	11.6379	1.43011	3.83401e-27	6.26441e-26		GALNT18	24.7881	2.82895	7.76123e-124	1.83197e-122		ENSSSCG00000022295	54.1336	1.21829	0	0		ENSSSCG00000008480	71.8185	1.06	0	0		DPEP2	22.5306
BCL11A	44.4752	2.00474	0	0		SNORD15-1	118.059	1.47322	0	0		ARF6	77.3478	1.23189	0	0		C4BPB	21.3713	1.67046	1.30134e-89	3.53151e-88		MACROH2A1	11.6364	0.906489	3.81377e-27	6.23516e-26		STXBP1	24.4763	1.43816	2.6996e-121	6.29963e-120		HSPB1	53.9564	0.804316	0	0		AAK1	71.6864	1.46446	0	0		TRAF4	22.5172
ENSSSCG00000007098	44.1905	1.1975	0	0		ATP5MC2	118.015	0.865068	0	0		ENSSSCG00000024743	77.34	1.83844	0	0		TOP1	21.3436	0.858863	1.51545e-89	4.10836e-88		ENSSSCG00000033734	11.6235	1.16251	4.34249e-27	7.07354e-26		ENSSSCG00000051044	24.4533	1.88471	5.52146e-121	1.28733e-119		UNC80	53.6168	1.39079	0	0		GHSR	71.539	3.19503	0	0		RIMBP2	22.4754
RPL5	44.1231	0.877511	0	0		ENSSSCG00000032073	118.009	1.51941	0	0		ENSSSCG00000005398	76.8598	2.37177	0	0		PYGB	21.3283	1.67051	2.83776e-89	7.66196e-88		KIF15	11.6002	3.19771	5.57054e-27	9.04627e-26		CACNB2	24.3645	1.04445	1.71311e-120	3.98365e-119		DIP2B	53.5573	1.3201	0	0		MIER1	71.2893	1.2794	0	0		ROBO2	22.473
CPPED1	44.0756	1.19946	0	0		ENSSSCG00000010968	117.859	2.27335	0	0		NFAT5	76.4259	1.27694	0	0		ATRX	21.2959	0.822323	3.04041e-89	8.2008e-88		SYNE2	11.5751	1.0378	6.58974e-27	1.06754e-25		C12orf57	24.3569	0.686582	1.5067e-120	3.50674e-119		FAM234A	53.5228	1.53718	0	0		PAPSS2	71.2559	2.58552	0	0		FAM20C	22.4397
PDX1	43.7394	0.897337	0	0		DUT	117.111	1.92724	0	0		APOBEC2	76.1029	1.16251	0	0		ENSSSCG00000021560	21.2451	0.781779	7.0252e-89	1.89106e-87		ITGB1	11.5703	0.792332	6.66741e-27	1.07946e-25		GLYCTK	24.3106	1.33263	7.64885e-120	1.76939e-118		CPLX2	53.5026	1.55913	0	0		SEZ6L2	71.1411	2.04464	0	0		ENSSSCG00000023228	22.4218
CCT4	43.6609	0.804348	0	0		PELI2	117.064	2.09582	0	0		NCAPH	75.7446	3.67227	0	0		LEPROTL1	21.181	1.23407	2.85665e-88	7.65864e-87		KIF20A	11.5387	3.04187	9.49704e-27	1.52922e-25		ENSSSCG00000028414	24.2973	0.426387	3.15124e-120	7.30238e-119		PGAP1	53.4841	1.63085	0	0		FBP1	70.9626	1.6237	0	0		TRAPPC4	22.4006
PTBP3	43.6445	1.12311	0	0		TRAM1	116.192	1.88388	0	0		BST1	75.5483	3.76575	0	0		TBPL1	21.1131	1.69227	1.03185e-87	2.7636e-86		ENSSSCG00000026055	11.4887	1.76419	1.43808e-26	2.30309e-25		SCAND1	24.2867	0.545349	3.91749e-120	9.07012e-119		PIN1	53.2709	0.936489	0	0		MDFIC	70.0483	2.43344	0	0		GDI1	22.3176
RPL27A	43.6207	0.388939	0	0		SPCS1	115.489	1.15097	0	0		RGN	75.5357	2.6174	0	0		RCN2	21.022	0.938149	3.33266e-87	8.85463e-86		SEPTIN7	11.4858	0.756634	1.39951e-26	2.24402e-25		PEX5L	24.2774	1.26904	1.27686e-119	2.94861e-118		PSAP	53.1135	0.931346	0	0		PCBD1	70.0103	0.778783	0	0		DYNLRB1	22.2977
GLCE	43.5955	1.61529	0	0		ENSSSCG00000051428	114.748	4.01812	0	0		PDE9A	75.4711	3.19908	0	0		SMARCA4	21.016	1.18865	4.23315e-87	1.12248e-85		ENSSSCG00000039107	11.4742	3.57308	1.67225e-26	2.6669e-25		SERPINI1	24.2424	0.936735	1.91393e-119	4.41213e-118		NAGS	53.0948	2.15542	0	0		ENSSSCG00000004572	69.9626	2.34304	0	0		GRM4	22.2555
CKAP4	43.5939	1.31076	0	0		CDC42EP5	114.168	1.78205	0	0		PKP4	75.4254	1.459	0	0		ARHGEF2	20.9701	2.14495	1.26054e-86	3.32594e-85		MZT1	11.4485	1.67372	2.02756e-26	3.22774e-25		TRAPPC4	24.205	0.980999	5.05849e-119	1.16411e-117		PARK7	53.027	0.555625	0	0		GDI1	69.7911	1.43295	0	0		DNAJC12	22.2128
RPS25	43.4974	0.327494	0	0		TMPRSS4	112.558	2.87535	0	0		CLDN6	75.2069	3.34123	0	0		FOXA2	20.9573	1.10332	1.0967e-86	2.89653e-85		NCAPD3	11.4401	2.65602	2.22883e-26	3.5397e-25		GDI1	24.1419	1.10615	2.00903e-118	4.57987e-117		BTBD17	52.9924	2.18284	0	0		RTL5	69.6276	2.18902	0	0		CBX6	22.187
H3-3B	43.4863	0.353959	0	0		GRB10	112.328	3.28961	0	0		MMP7	74.4924	6.17261	0	0		MTMR7	20.9287	1.34611	1.98819e-86	5.22518e-85		CITED1	11.4317	1.27972	2.2796e-26	3.61817e-25		VWA5B2	24.0903	1.53093	7.74094e-118	1.75864e-116		KIAA0408	52.7791	1.48469	0	0		ENSSSCG00000026414	69.4213	0.54751	0	0		RHOF	22.1853
PRR35	43.415	1.74934	0	0		EIF4EBP1	111.542	1.89417	0	0		GPC4	74.442	2.25579	0	0		ENSSSCG00000000908	20.9144	0.71664	1.59812e-86	4.21248e-85		UCP2	11.4003	2.5465	3.14007e-26	4.95733e-25		ENSSSCG00000048603	24.003	1.72316	5.55465e-117	1.25446e-115		MRPL57	52.7295	0.70658	0	0		SCAND1	69.3901	0.712334	0	0		CFAP20	22.1637
NUCKS1	43.4042	0.630075	0	0		TPM1	110.985	1.42841	0	0		EPB41L2	74.4221	3.56166	0	0		DCX	20.854	1.69587	7.372e-86	1.93172e-84		C11orf58	11.3739	0.682836	3.69974e-26	5.82021e-25		NALCN	23.9081	2.4216	4.57914e-116	1.02892e-114		TAGLN3	52.6628	1.6656	0	0		KIF1A	69.2883	2.15286	0	0		PAXX	21.9093
KIAA1191	42.9916	1.32425	0	0		SNORD58-1	110.212	1.67771	0	0		FOXP1	74.2087	0.835658	0	0		ENSSSCG00000008012	20.8338	1.05265	8.16403e-86	2.13716e-84		SSNA1	11.3691	1.33622	4.00774e-26	6.30101e-25		DNAJC6	23.8893	1.89938	5.76078e-116	1.29225e-114		ENSSSCG00000050649	52.6565	1.60239	0	0		IMMP1L	69.2385	0.946239	0	0		ENSSSCG00000012452	21.8564
FOXP1	42.8564	0.693077	0	0		EIF3H	109.524	1.05499	0	0		TRIP6	74.0208	3.1036	0	0		CAPRIN1	20.7571	0.870376	2.59538e-85	6.76093e-84		MPHOSPH9	11.3285	1.49404	5.69493e-26	8.92731e-25		RAP1B	23.8672	0.9627	6.28161e-116	1.40789e-114		ENSSSCG00000041220	52.5771	0.655598	0	0		GNAI1	69.1733	1.4094	0	0		TMEM35A	21.813
PSMB7	42.8432	0.660618	0	0		ST13	109.072	0.907952	0	0		LAMB1	73.7403	1.2058	0	0		GTF3C6	20.6702	1.3163	1.38531e-84	3.56687e-83		CHST9	11.2995	1.38285	7.27025e-26	1.13834e-24		SLC38A11	23.8495	3.9099	1.90547e-115	4.24928e-114		TIMM8B	52.4751	0.697893	0	0		HSPA6	69.1493	2.67335	0	0		FMC1	21.7776
SSB	42.6947	0.750855	0	0		RTRAF	108.084	1.08329	0	0		ARHGAP29	73.6735	3.39181	0	0		APEX1	20.642	1.36161	2.24797e-84	5.78244e-83		SLBP	11.2859	1.33184	8.20969e-26	1.28241e-24		ETNK2	23.8196	1.29302	1.72329e-115	3.84945e-114		FOXO1	52.4018	1.47575	0	0		TBC1D5	69.1457	1.5122	0	0		ENSSSCG00000012046	21.7515
RANBP1	42.5819	0.941204	0	0		GSTK1	108.012	1.74595	0	0		ENSSSCG00000003090	73.6454	1.49714	0	0		LRRN2	20.6364	2.52599	3.268e-84	8.39006e-83		PRR11	11.2619	3.08394	1.041e-25	1.61759e-24		LY6H	23.7242	1.38459	1.11737e-114	2.47727e-113		CXXC4	52.261	1.15266	0	0		RNF152	69.1314	1.88706	0	0		KIAA1549	21.724
MCM7	42.5182	1.33161	0	0		ENSSSCG00000044572	107.756	1.7802	0	0		ITM2C	73.6057	1.3305	0	0		TESC	20.5983	1.60132	4.72489e-84	1.20954e-82		ENSSSCG00000038144	11.2464	1.27415	1.13987e-25	1.76813e-24		PSD	23.7223	1.56044	1.37308e-114	3.03661e-113		TM4SF4	52.25	1.21633	0	0		MAML3	69.047	1.15855	0	0		C1orf210	21.6956
POLR1D	42.4963	0.649674	0	0		SNORD33	107.176	1.58905	0	0		SPATS2L	73.3931	1.54952	0	0		STARD10	20.5336	0.915557	1.05278e-83	2.68474e-82		SELENOW	11.2418	0.763864	1.15311e-25	1.78763e-24		ATP5MD	23.6938	0.460308	6.4702e-115	1.43567e-113		RFX2	52.2251	2.40322	0	0		CHN1	69.0102	2.99697	0	0		SCN3A	21.5762
ENSSSCG00000048263	42.4928	1.04944	0	0		YBX1	107.131	0.934701	0	0		CDA	73.2821	1.19446	0	0		MFGE8	20.4748	2.28195	4.74059e-83	1.20202e-81		NCAPD2	11.2309	2.7913	1.35607e-25	2.09738e-24		CELF4	23.688	1.66686	2.93714e-114	6.45808e-113		CPNE4	52.1597	3.19116	0	0		NPTX2	68.7773	1.67504	0	0		SLC25A4	21.5554
SUCLG1	42.3759	0.565651	0	0		IBTK	105.721	2.35834	0	0		ENSSSCG00000032334	72.9462	3.56611	0	0		ENSSSCG00000041063	20.4605	1.11019	4.00616e-83	1.01773e-81		PLK4	11.228	2.11752	1.3761e-25	2.12713e-24		ALCAM	23.6753	1.02008	2.4952e-114	5.50452e-113		OSBPL1A	52.1234	1.37516	0	0		CEP126	68.5502	1.6755	0	0		ATP6V1E1	21.544
FBL	42.1575	1.26855	0	0		ENSSSCG00000002761	105.392	2.87462	0	0		GYPC	72.321	3.02813	0	0		RAP1GAP2	20.4219	1.37055	8.08581e-83	2.04245e-81		TTK	11.221	3.50844	1.48379e-25	2.29094e-24		JUNB	23.6674	1.00429	2.70966e-114	5.96281e-113		ENSSSCG00000002913	52.0879	1.45148	0	0		SRI	68.5475	0.916149	0	0		C5orf15	21.4916
RBFOX1	42.1337	1.56568	0	0		ONECUT1	104.178	1.55252	0	0		PKP2	72.0731	1.86647	0	0		SERPINA1	20.4207	2.0315	1.07655e-82	2.70905e-81		SPEF2	11.2092	1.76164	1.60721e-25	2.47862e-24		OR51E1	23.6291	2.92816	1.41767e-113	3.09923e-112		GSTM3	51.8963	1.06669	0	0		SLC37A4	68.2363	1.37754	0	0		CFAP36	21.4809
ENSSSCG00000046579	42.1239	1.63313	0	0		HERPUD1	103.407	1.80374	0	0		CFP	72.0435	1.42088	0	0		AEN	20.4197	1.7078	9.61502e-83	2.42643e-81		ENSSSCG00000013902	11.2089	0.974409	1.56318e-25	2.41211e-24		RIMBP2	23.5704	1.37423	2.62554e-113	5.73038e-112		DNAJC12	51.819	1.52282	0	0		ENSSSCG00000012757	68.1765	0.899649	0	0		PTPN18	21.458
RPS3	41.7123	0.264243	0	0		RPL4	101.642	1.43496	0	0		C21orf62	72.0195	4.0909	0	0		ATP6V1B2	20.3945	1.13853	1.289e-82	3.24062e-81		ENSSSCG00000049515	11.2042	1.18952	1.65057e-25	2.54255e-24		SNAP25	23.5262	0.921589	2.96853e-113	6.47369e-112		NPTX2	51.7222	1.58996	0	0		TSPAN13	67.9387	1.16485	0	0		ENSSSCG00000007524	21.4235
FMOD	41.6847	2.76741	0	0		C1QBP	101.183	1.29106	0	0		RASSF9	71.7725	2.62244	0	0		ADCK2	20.345	2.11833	3.6291e-82	9.07242e-81		ENSSSCG00000002459	11.2034	0.886633	1.63496e-25	2.51995e-24		FAM162B	23.5109	0.962495	5.34209e-113	1.16213e-111		NOVA1	51.6796	1.21862	0	0		ENSSSCG00000044111	67.7779	2.50024	0	0		ENSSSCG00000041087	21.4175
NUTF2	41.5929	0.826455	0	0		ZBTB16	101.119	2.43543	0	0		EREG	71.6644	5.16942	0	0		EIF5B	20.1641	0.783661	4.12265e-81	1.01726e-79		ENSSSCG00000038713	11.1738	1.35486	2.14249e-25	3.29269e-24		COX4I2	23.4861	1.13336	1.21982e-112	2.64285e-111		ELAPOR1	51.5608	1.5787	0	0		ZEB1	67.3359	1.62605	0	0		CYTH2	21.3874
ENSSSCG00000013318	41.5103	1.36742	0	0		SURF2	100.964	2.30427	0	0		FLNA	71.4602	2.18762	0	0		CALM1	20.1074	0.666484	7.34516e-81	1.8074e-79		SHCBP1	11.1621	3.47713	2.45847e-25	3.76961e-24		ENSSSCG00000040980	23.4001	2.99746	1.37866e-111	2.97248e-110		PFKP	51.52	1.59825	0	0		ADAM23	67.1438	3.81611	0	0		IP6K2	21.379
SERHL2	41.4764	1.16846	0	0		TOMM20	100.468	1.07959	0	0		CTDSPL	71.4507	1.34537	0	0		PEA15	20.0858	2.13438	2.39656e-80	5.86463e-79		CCDC167	11.1516	0.940733	2.54639e-25	3.89993e-24		CHMP5	23.2879	0.750374	4.50742e-111	9.67916e-110		ZDHHC2	51.4115	1.9124	0	0		NBEA	67.0611	1.00593	0	0		BEX5	21.2788
ENSSSCG00000038947	41.4253	0.680544	0	0		MRTO4	100.446	1.96941	0	0		CALD1	71.4279	1.13396	0	0		ELAVL3	20.0775	3.43813	3.16043e-80	7.71974e-79		SGO1	11.1321	3.47926	3.17876e-25	4.84615e-24		VPS28	23.2731	0.609067	4.66855e-111	1.00171e-109		RPF2	51.3668	1.7128	0	0		SLC7A8	66.9852	1.51531	0	0		PYGB	21.2745
MYC	41.3392	1.49993	0	0		SLC43A1	100.408	6.24047	0	0		KCNV1	71.2675	4.99509	0	0		KRT8	20.0585	0.490632	2.16379e-80	5.2999e-79		DCX	11.1088	1.663	3.76531e-25	5.72073e-24		ABCC8	23.2546	1.02394	9.41079e-111	2.01598e-109		SLC43A2	51.2969	2.14057	0	0		ENSSSCG00000037142	66.6336	1.3854	0	0		SNAP25	21.1636
PLEKHB1	41.2938	2.18917	0	0		ENSSSCG00000039821	100.284	2.21356	0	0		PROS1	71.2209	1.52716	0	0		FEV	20.0315	2.23335	6.01408e-80	1.46365e-78		DHDDS	11.0984	1.3976	4.11174e-25	6.23997e-24		FLRT1	23.2206	2.24269	4.11994e-110	8.79747e-109		LRPAP1	51.2311	0.829429	0	0		SKP1	66.3075	0.565978	0	0		ENSSSCG00000047455	21.0705
CCNG1	41.2907	0.820352	0	0		SND1	100.001	1.45221	0	0		CRYBG1	71.163	2.2305	0	0		PKIA	20.0104	1.82631	7.59141e-80	1.84415e-78		EZH2	11.0839	1.89041	4.69508e-25	7.10098e-24		ENSSSCG00000046007	23.0958	2.36825	5.06216e-109	1.0681e-107		PAPPA2	51.2019	2.13312	0	0		GBA3	66.1575	4.66375	0	0		ASPDH	21.0228
RBM14	41.232	0.601895	0	0		FKBP2	99.8205	1.09347	0	0		APLP2	71.0788	1.50085	0	0		BCL7A	19.9981	1.62828	8.61136e-80	2.09002e-78		ASPM	11.0538	3.58119	6.20228e-25	9.30657e-24		DCXR	23.0817	0.81354	2.90269e-109	6.15384e-108		SOD1	51.0095	0.58936	0	0		PLCL2	66.1286	3.44015	0	0		IMMP1L	20.9737
ANAPC15	41.1032	1.01465	0	0		RPL5	99.688	1.34802	0	0		HES4	70.6748	4.31736	0	0		NT5DC3	19.8678	2.21081	8.01977e-79	1.92366e-77		SKA1	11.0335	3.19445	7.34494e-25	1.09717e-23		SMARCD3	23.0642	1.04164	5.26321e-109	1.10965e-107		NEDD8	50.8625	0.656844	0	0		ENSSSCG00000032984	65.9154	1.67549	0	0		ACLY	20.9604
STMN1	40.933	0.882841	0	0		ENSSSCG00000030991	99.3072	3.26012	0	0		SPTBN1	70.6546	1.29493	0	0		SH3BGRL3	19.8658	0.731934	4.93882e-79	1.18786e-77		KCND2	11.0048	2.54317	9.32861e-25	1.38727e-23		BLOC1S1	23.0432	0.591757	4.845e-109	1.0239e-107		ENSSSCG00000020790	50.8181	0.61711	0	0		AP1AR	65.2673	1.2154	0	0		SERPINF2	20.9166
CFP	40.7085	1.1548	0	0		KCNMA1	99.2797	1.72693	0	0		FAM102A	70.6514	1.76431	0	0		H2AC21	19.8328	1.24688	1.12773e-78	2.70259e-77		FBLN1	11.0044	1.97689	9.26472e-25	1.37853e-23		ENSSSCG00000043697	23.011	1.2189	1.70959e-108	3.59013e-107		ECHDC1	50.8112	1.28432	0	0		RPH3AL	65.1475	1.30911	0	0		ENSSSCG00000041220	20.9101
PTPRF	40.6816	0.830925	0	0		FMO3	99.0013	6.06647	0	0		CYP27A1	70.5293	2.80287	0	0		PRKCA	19.8286	1.13249	1.1679e-78	2.79634e-77		CCNB2	10.998	3.70668	9.98468e-25	1.48235e-23		ZFAND6	22.9723	0.598146	1.66658e-108	3.50257e-107		LAMTOR4	50.7537	0.732822	0	0		IGFBP5	65.0911	1.07471	0	0		STAT1	20.8392
ENSSSCG00000028695	40.6632	1.96654	0	0		KLHL23	98.7909	2.0042	0	0		LUZP1	70.5094	2.15623	0	0		SLC17A7	19.8083	4.89289	2.48402e-78	5.92629e-77		BTG3	10.9476	1.09603	1.45307e-24	2.14532e-23		KIAA1549	22.9682	1.093	3.4307e-108	7.18183e-107		APOBEC2	50.7332	0.988622	0	0		SST	65.021	1.19078	0	0		PREB	20.8336
SNORD33-1	40.6146	0.387302	0	0		TNNT1	98.5912	2.89085	0	0		ESD	70.1689	0.767891	0	0		ACLY	19.7601	0.799737	2.54253e-78	6.06045e-77		ZWILCH	10.9325	2.15316	1.70814e-24	2.50963e-23		SCN3A	22.9631	2.16395	6.57062e-108	1.37119e-106		TIMM17B	50.5014	0.89447	0	0		PHF14	64.976	1.10437	0	0		SLC29A4	20.7926
RASA3	40.3594	2.56443	0	0		SNORA70-28	98.3649	1.70305	0	0		PHLDB1	69.7537	2.77383	0	0		KDM6B	19.7381	1.6399	5.72392e-78	1.35951e-76		CENPT	10.9122	3.29421	2.05855e-24	3.00923e-23		RAB3B	22.9597	1.36077	4.91151e-108	1.02656e-106		MAP1B	50.4726	1.34692	0	0		GADD45G	64.971	1.96841	0	0		JAZF1	20.7349
NASP	40.247	0.982922	0	0		SEC61A1	98.308	1.86451	0	0		SOX10	69.6104	4.58398	0	0		IDI1	19.7301	1.04579	5.49878e-78	1.3072e-76		DPYSL2	10.8937	1.64754	2.34764e-24	3.42807e-23		TPD52L1	22.9079	2.34115	2.00707e-107	4.17536e-106		CCND3	50.4361	1.36698	0	0		C1orf194	64.8879	1.69842	0	0		ENSSSCG00000015083	20.7139
ENSSSCG00000025281	40.2238	0.886052	0	0		PRR35	98.2935	3.29386	0	0		PDGFC	69.6018	2.54735	0	0		POLE4	19.7113	0.80153	5.89456e-78	1.3963e-76		MAPRE2	10.8936	1.10688	2.2896e-24	3.34515e-23		PRLHR	22.8574	2.00495	5.0265e-107	1.04242e-105		SKAP1	50.4178	2.32794	0	0		ENSSSCG00000034230	64.8712	0.66244	0	0		PGAP1	20.7059
HIPK2	40.1542	0.990476	0	0		ACOT13	98.1089	1.23878	0	0		DSP	69.4943	1.17436	0	0		ENSSSCG00000033734	19.6892	1.07217	1.08021e-77	2.54074e-76		ENSSSCG00000012961	10.8838	0.565352	2.46963e-24	3.60226e-23		ENSSSCG00000007188	22.7817	0.714471	1.01434e-106	2.10196e-105		ENSSSCG00000021374	50.3856	1.61809	0	0		CNTN3	64.7113	1.75735	0	0		IGFBP1	20.6847
PTOV1	40.1161	0.726905	0	0		ENSSSCG00000027538	97.7586	1.00058	0	0		KRT8	69.3945	0.507288	0	0		CARHSP1	19.6613	0.54008	1.12734e-77	2.64926e-76		LMNB2	10.8603	2.07091	3.14747e-24	4.57594e-23		RCAN2	22.759	1.41994	2.78214e-106	5.74294e-105		ATP6AP1	50.3003	1.05389	0	0		AP1S2	64.6546	1.7738	0	0		C6orf52	20.6456
TEAD1	40.031	0.974131	0	0		PPA1	97.6964	1.75136	0	0		ENSSSCG00000045233	69.367	2.83721	0	0		CKB	19.5985	1.12791	4.59542e-77	1.07518e-75		ENPP2	10.8208	1.13823	4.2551e-24	6.1527e-23		AMIGO2	22.7302	1.67237	5.4979e-106	1.13225e-104		GDI1	50.2762	1.32532	0	0		CSTB	64.5516	0.718605	0	0		PFKP	20.6199
NFE2L3	40.0128	2.22235	0	0		DNPH1	96.7421	1.98873	0	0		TMPRSS2	69.3442	3.33546	0	0		SYNCRIP	19.5682	0.9421	6.58767e-77	1.53861e-75		MYEF2	10.7637	1.17183	6.94996e-24	1.00059e-22		ATP6V0B	22.6782	0.627031	6.26761e-106	1.28977e-104		PRNP	50.2437	1.2285	0	0		PACRG	64.2069	2.37748	0	0		LSM6	20.5632
POPDC3	39.9356	1.47546	0	0		CCND2	96.4576	2.31188	0	0		ENSSSCG00000048603	69.0764	2.19228	0	0		ENSSSCG00000037645	19.548	2.84006	1.43175e-76	3.33229e-75		FAM155A	10.7332	2.26581	9.18239e-24	1.31631e-22		XXYLT1	22.632	2.34376	4.4727e-105	9.12657e-104		PTOV1	50.1428	0.768514	0	0		AQP11	64.0978	1.50096	0	0		VPS41	20.5367
S100A11	39.9354	0.839651	0	0		C12orf49	96.1166	1.47122	0	0		CTNND1	68.9815	1.23679	0	0		DUSP5	19.5407	2.28995	1.48578e-76	3.45502e-75		DIAPH3	10.7207	3.17814	1.03044e-23	1.47319e-22		CAMK2B	22.6238	1.53316	4.04427e-105	8.25869e-104		RNF152	50.0607	1.72508	0	0		SH3BGRL3	64.0728	0.777976	0	0		TLE1	20.4897
RALY	39.925	0.7365	0	0		TC2N	95.6432	2.84059	0	0		ENSSSCG00000012257	68.867	3.08187	0	0		ATP2A3	19.5327	2.09937	1.68262e-76	3.90934e-75		TOPBP1	10.6802	1.97988	1.42549e-23	2.02819e-22		ENSSSCG00000025500	22.6148	3.04762	7.13165e-105	1.44746e-103		ENSSSCG00000012520	49.9626	1.0605	0	0		ENSSSCG00000027746	64.0237	0.597414	0	0		TCF4	20.4546
CKS2	39.9035	1.73046	0	0		LARP1	95.6037	1.6395	0	0		LRBA	68.8354	0.983902	0	0		ENSSSCG00000020808	19.4964	0.921379	2.08967e-76	4.8424e-75		ANLN	10.6712	3.22054	1.55904e-23	2.21112e-22		ENSSSCG00000012046	22.604	0.686673	2.97348e-105	6.08137e-104		USH1C	49.9542	1.27702	0	0		ENSSSCG00000033734	63.9909	1.01098	0	0		ST18	20.45
FZD9	39.8943	2.422	0	0		RPN1	95.3435	1.20749	0	0		MAPT	68.2116	1.45955	0	0		TSPAN3	19.4695	0.611854	2.53291e-76	5.85425e-75		SQLE	10.6636	1.50263	1.6175e-23	2.29281e-22		YPEL3	22.5471	0.863806	1.15694e-104	2.34459e-103		CASTOR2	49.777	1.80271	0	0		PAM	63.931	1.06441	0	0		LDHA	20.3729
HMGN3	39.8592	0.470659	0	0		VKORC1	95.2384	1.28045	0	0		TRIO	68.0618	1.20819	0	0		TCF3	19.4523	1.48879	5.22723e-76	1.20398e-74		ENSSSCG00000004806	10.6467	3.68672	1.91915e-23	2.71318e-22		H3-3A	22.5342	0.23387	5.07402e-105	1.03377e-103		DACH1	49.6951	0.861232	0	0		CAPSL	63.7019	1.55138	0	0		RFX3	20.3388
MEX3A	39.8542	1.84704	0	0		GATA4	95.0046	3.14275	0	0		FREM1	68.0469	4.94413	0	0		SRSF7	19.4362	0.617076	4.37707e-76	1.01078e-74		PGAP1	10.6309	1.25462	2.10776e-23	2.97352e-22		UBE3A	22.5254	0.786112	1.75666e-104	3.55454e-103		DPCD	49.6706	1.0277	0	0		PKIB	63.5688	0.844997	0	0		ENSSSCG00000008012	20.3366
HNRNPH1	39.7709	0.541354	0	0		ENSSSCG00000002953	94.2864	1.43424	0	0		HSPG2	67.8893	1.74841	0	0		ST18	19.4109	2.27338	1.1586e-75	2.64798e-74		ENSSSCG00000025281	10.6255	1.15325	2.24458e-23	3.16319e-22		LMX1A	22.4676	6.8285	1.43973e-103	2.90223e-102		STPG4	49.2961	0.473178	0	0		C5orf15	63.3524	1.06163	0	0		RGS7	20.3022
EFEMP1	39.7661	2.19693	0	0		MACROD1	94.0629	2.39549	0	0		DDAH2	67.7142	1.39947	0	0		ATP5MD	19.3939	0.53868	8.49508e-76	1.94824e-74		EIF1B	10.6102	0.582566	2.38339e-23	3.35348e-22		TUBA4A	22.4588	0.981474	6.90679e-104	1.39544e-102		CBX6	49.2586	1.0729	0	0		RAB11A	63.2927	0.871341	0	0		ROGDI	20.3006
HMGN1	39.632	0.423805	0	0		DPEP1	93.2933	5.0257	0	0		SELENOW	67.5228	0.862656	0	0		LDB1	19.3798	1.46266	1.62014e-75	3.68703e-74		RNASEH2C	10.6098	0.750561	2.48885e-23	3.49081e-22		AHSA1	22.4484	0.800064	7.98828e-104	1.61272e-102		EPDR1	49.1116	3.15738	0	0		DUSP14	63.2391	2.05099	0	0		CACNB2	20.2671
UTP18	39.5797	1.65202	7.41707e-308	2.05039e-306		ATP2B1	93.1015	1.26969	0	0		SOD3	67.5136	1.79031	0	0		SSB	19.3694	0.633351	1.26177e-75	2.87885e-74		GNAI2	10.6036	0.967137	2.61632e-23	3.66574e-22		RAB3A	22.3944	1.4447	3.34197e-103	6.71139e-102		FAM20A	49.0859	2.04332	0	0		SOX5	63.2099	1.04627	0	0		B3GAT2	20.2491
ENSSSCG00000033653	39.5318	0.738091	0	3.91128e-308		GPT2	92.6247	3.09472	0	0		PKD2	67.4643	1.71959	0	0		ENO1	19.3691	0.580489	1.31561e-75	2.99911e-74		HIGD1A	10.6017	1.05418	2.66404e-23	3.73063e-22		TIMM17B	22.3711	0.690388	3.07994e-103	6.18985e-102		UBE2V2	49.0757	0.958021	0	0		NYAP2	63.1433	5.14787	0	0		PDLIM4	20.2263
SELENOP	39.501	0.721798	0	0		FMNL2	92.4438	2.13988	0	0		CA13	67.4137	3.25234	0	0		RALY	19.3655	0.690401	1.44657e-75	3.29484e-74		MCM7	10.5981	1.34268	2.8035e-23	3.91976e-22		ENSSSCG00000048017	22.3553	1.10069	5.89594e-103	1.17782e-101		ENSSSCG00000028414	49.0643	0.494922	0	0		FAH	62.6757	1.2559	0	0		NDUFA1	20.194
COMTD1	39.4869	1.20363	1.58817e-307	4.38581e-306		ENSSSCG00000024911	92.4223	3.60099	0	0		EPB41L4A	67.378	2.5102	0	0		CCNG2	19.3105	1.57749	4.97528e-75	1.12457e-73		RUNX1T1	10.5939	0.850246	2.78519e-23	3.89824e-22		IGFBP1	22.3492	1.8293	9.62312e-103	1.91378e-101		ENSSSCG00000041963	49.0391	3.35572	0	0		VWA5B2	62.6284	1.87527	0	0		PKIB	20.1936
ENSSSCG00000029857	39.4292	0.949814	6.93475e-308	1.91905e-306		CANX	92.325	1.08418	0	0		SFT2D1	67.288	1.28882	0	0		GFOD2	19.2756	2.11346	9.76273e-75	2.20107e-73		HDGFL3	10.5823	1.06292	3.14163e-23	4.38102e-22		NOVA1	22.3368	0.883524	6.33491e-103	1.26267e-101		CARHSP1	48.9906	0.634369	0	0		CHAC2	62.5171	2.64321	0	0		CAPSL	20.1912
ENSSSCG00000038144	39.3695	1.29309	1.01125e-305	2.77537e-304		SMOC1	92.2751	2.73019	0	0		FARP1	67.1724	1.29576	0	0		ENSSSCG00000008981	19.2521	1.97833	1.36585e-74	3.07419e-73		MCM5	10.5758	1.96175	3.41849e-23	4.75219e-22		ENSSSCG00000034868	22.3102	0.680937	9.15218e-103	1.82148e-101		RAB1B	48.8743	1.06325	0	0		KCND2	62.4457	3.17369	0	0		CETN3	20.1536
C1QBP	38.8655	0.704168	3.4869e-301	9.53052e-300		PLCB1	91.7473	1.71033	0	0		GPRC5B	67.0085	2.43494	0	0		CNIH4	19.2093	1.07519	2.17644e-74	4.88626e-73		APP	10.5649	0.59903	3.38217e-23	4.70415e-22		ST18	22.3094	2.11171	2.18712e-102	4.33342e-101		RAP1GAP	48.8306	2.80179	0	0		PRKACA	62.4427	1.75265	0	0		ENSSSCG00000029752	20.1119
RAD51B	38.8582	1.36717	1.53227e-298	4.15397e-297		OGT	91.6365	1.4157	0	0		CTNNA1	66.8713	1.07542	0	0		GABARAPL2	19.0964	0.577848	8.46411e-74	1.88911e-72		PCMT1	10.5626	0.846077	3.66148e-23	5.08467e-22		ADORA2A	22.2943	4.17986	3.81205e-102	7.53056e-101		BACE1	48.8203	1.427	0	0		S100A10	62.337	0.781384	0	0		STX7	20.029
GSTA4	38.7838	0.915391	4.60046e-299	1.24845e-297		ENSSSCG00000035080	91.0334	1.61043	0	0		ENSSSCG00000005247	66.8381	1.94976	0	0		ASCL2	19.0713	2.14703	2.39601e-73	5.29887e-72		HAT1	10.552	1.38412	4.12031e-23	5.71291e-22		DPYSL2	22.171	1.44629	2.51245e-101	4.9559e-100		ASB13	48.7991	1.77211	0	0		PAPPA2	62.2832	1.9689	0	0		NCALD	19.9867
EIF3E	38.6662	0.525025	2.7838e-300	7.57767e-299		ENSSSCG00000036983	90.9845	4.9554	0	0		NOTCH1	66.8003	2.30829	0	0		RCAN2	19.0405	1.50282	3.42559e-73	7.56327e-72		PSMD2	10.5489	0.718267	3.97309e-23	5.51453e-22		VIL1	22.1291	0.851808	3.7571e-101	7.40008e-100		GNAS	48.7924	1.06791	0	0		ENSSSCG00000043697	62.2311	1.49869	0	0		NCOA7	19.9853
MED21	38.5196	0.677211	1.46146e-295	3.90637e-294		EXOSC5	90.2423	2.58022	0	0		HHEX	66.7746	2.22565	0	0		PXYLP1	19.008	1.61454	5.91401e-73	1.30358e-71		E2F1	10.5461	3.03298	4.42254e-23	6.12559e-22		NEDD8	22.1063	0.489924	3.88878e-101	7.65377e-100		MAPRE2	48.4942	1.30594	0	0		ENSSSCG00000012046	62.1915	0.85314	0	0		UTP11	19.9738
AHCY	38.4899	1.52839	4.02691e-293	1.07206e-291		MCF2L	89.7285	1.72794	0	0		HIVEP2	66.6491	2.07301	0	0		MARS1	18.9792	1.64461	9.31811e-73	2.04714e-71		KDSR	10.5333	0.983244	4.70146e-23	6.49167e-22		EPB41L3	22.0829	1.4714	1.41685e-100	2.78244e-99		ENSSSCG00000039807	48.4563	2.61706	0	0		PPIP5K2	62.0557	1.27462	0	0		ARFGEF1	19.9704
ATP5PB	38.4442	0.451024	7.28112e-296	1.94814e-294		GLS2	89.7218	4.17281	0	0		AQP9	66.6021	5.89078	0	0		FAM162B	18.9503	1.18612	1.32012e-72	2.89546e-71		ENSSSCG00000007493	10.5219	3.28073	5.41569e-23	7.45854e-22		ENSSSCG00000009610	22.0797	1.58455	1.53304e-100	3.00618e-99		TXNDC15	48.2806	1.07429	0	0		BTBD17	61.9553	1.86247	0	0		LIN7B	19.8958
ENSSSCG00000013391	38.3699	0.816879	5.08185e-293	1.35156e-291		ENSSSCG00000027270	89.491	1.41392	0	0		SAMD5	66.4439	2.9038	0	0		ADGRG1	18.9331	1.74422	1.94367e-72	4.24913e-71		INCENP	10.5214	2.69491	5.40683e-23	7.45019e-22		SYT4	21.9609	1.84446	1.60423e-99	3.12052e-98		MAPRE3	48.2654	1.24277	0	0		GAD2	61.8862	3.72742	0	0		NBL1	19.8838
RABGAP1L	38.3325	0.977044	1.60519e-292	4.2564e-291		SLC25A3	89.3657	0.634955	0	0		PHYHIPL	66.2239	1.79486	0	0		DLL1	18.9207	2.41642	2.68311e-72	5.86083e-71		PNP	10.5168	2.07068	5.58454e-23	7.6871e-22		PWWP2A	21.96	1.09741	1.22325e-99	2.38118e-98		GNAO1	48.2404	1.4223	0	0		SETBP1	61.87	1.14023	0	0		TRIM59	19.8664
HSP90AA1	38.2901	0.478562	7.36811e-293	1.95765e-291		ADGRB1	89.1494	3.77553	0	0		SLC5A8	66.2005	5.62456	0	0		SRSF2	18.9135	0.605663	1.67185e-72	3.66392e-71		ENSSSCG00000011489	10.4857	1.1304	6.97704e-23	9.5742e-22		MRPL57	21.9568	0.513266	7.4273e-100	1.44792e-98		DCTN6	48.2003	1.11527	0	0		CITED2	61.8493	0.980977	0	0		PTPRH	19.8303
RPLP1	38.2189	0.25305	3.34547e-305	9.17215e-304		POLE4	89.0501	1.25201	0	0		RGS6	66.1154	3.68863	0	0		BAZ1A	18.7795	1.95668	2.18864e-71	4.73034e-70		SAE1	10.4716	1.29568	7.95549e-23	1.08944e-21		FBXL2	21.8784	1.26572	6.27041e-99	1.21527e-97		ATP6V1E1	48.1426	0.865468	0	0		PTOV1	61.839	0.73821	0	0		NAT14	19.8243
ADH5	38.1451	0.739191	1.77378e-290	4.69408e-289		SLC6A15	88.9438	2.94304	0	0		ADH5	66.0354	0.873887	0	0		DPYSL2	18.7732	1.5862	2.25624e-71	4.87249e-70		PTMA	10.4583	0.35806	8.20102e-23	1.12249e-21		ENSSSCG00000012520	21.7275	0.777967	7.60573e-98	1.46132e-96		NEGR1	48.106	1.39466	0	0		IFT22	61.7168	1.39953	0	0		RAB11A	19.7786
ENSSSCG00000039071	38.0474	0.804531	1.14073e-288	2.99796e-287		ENSSSCG00000016810	88.933	3.07701	0	0		PPP1R15A	65.9572	1.62186	0	0		ENSSSCG00000008137	18.7557	1.09915	2.58766e-71	5.58368e-70		ANXA10	10.4556	1.31917	9.02721e-23	1.22926e-21		SPOCK2	21.6883	2.2175	3.09457e-97	5.90739e-96		KCNJ11	47.9565	1.44031	0	0		BAMBI	61.5842	1.61072	0	0		TSPAN13	19.7777
ENSSSCG00000050424	38.0468	3.72398	4.42625e-285	1.15529e-283		ERP29	88.2204	0.847226	0	0		PRSS8	65.7438	1.50727	0	0		ENSSSCG00000038713	18.7009	1.20985	6.15739e-71	1.32223e-69		SMIM18	10.4526	3.10121	9.60086e-23	1.30604e-21		KIF1A	21.6839	1.41019	2.63226e-97	5.02846e-96		DPP4	47.8244	2.44562	0	0		PSD	61.373	1.93466	0	0		ENSSSCG00000051524	19.6963
ENSSSCG00000049996	37.944	3.90888	1.2454e-283	3.23162e-282		TENT5C	88.0177	1.79464	0	0		TOB2	65.7305	1.62479	0	0		HPCA	18.5975	3.40903	4.13711e-70	8.8059e-69		NEUROD1	10.4332	0.995993	1.05929e-22	1.43732e-21		ENSSSCG00000008222	21.6734	0.517803	1.63805e-97	3.1382e-96		SLC25A4	47.6703	1.0237	0	0		BTBD19	61.2461	1.78555	0	0		GCH1	19.6809
MACROH2A2	37.8421	1.05614	5.21863e-285	1.35944e-283		S100A1	87.9193	1.30046	0	0		ADAMTS9	65.5058	2.99903	0	0		ENSSSCG00000036350	18.5703	0.384442	3.31475e-70	7.06678e-69		ELP4	10.4308	0.941673	1.08375e-22	1.46977e-21		ANKH	21.616	1.60814	1.04977e-96	1.99255e-95		ENSSSCG00000022058	47.5989	0.814255	0	0		ENSSSCG00000039731	61.1666	0.92694	0	0		CTNND2	19.6185
UOX	37.8256	0.457386	3.79696e-287	9.94937e-286		ENSSSCG00000021767	87.8204	3.93967	0	0		SLC25A3	65.4005	0.468591	0	0		SINHCAF	18.4787	1.24541	1.95687e-69	4.1355e-68		PCYOX1L	10.4218	1.69128	1.21575e-22	1.64626e-21		GRIK1	21.6061	1.92098	1.36088e-96	2.57755e-95		RAP1A	47.5233	0.917368	0	0		MIEN1	61.1552	0.914954	0	0		DPP10	19.6002
ENSSSCG00000051000	37.8016	3.74782	7.84622e-282	2.01634e-280		CTBS	87.4936	3.29306	0	0		CLDN8	65.3988	3.99883	0	0		ARNT2	18.4613	2.48692	3.14747e-69	6.63059e-68		ARPC5L	10.4193	1.17386	1.22454e-22	1.65648e-21		MAP2K6	21.4891	1.45059	1.08645e-95	2.04759e-94		ENSSSCG00000000908	47.5139	0.743604	0	0		PTPN18	61.1301	0.930926	0	0		TMEM179	19.5948
SPATS2L	37.7573	1.14367	4.02513e-284	1.0465e-282		MLXIP	87.412	1.9158	0	0		SLC40A1	65.3201	2.66671	0	0		U1	18.4598	2.40934	3.18998e-69	6.71484e-68		ENSSSCG00000032946	10.4173	1.23847	1.24826e-22	1.68772e-21		FGL2	21.4555	6.24262	3.20765e-95	6.0113e-94		PRKAR1A	47.3831	0.72195	0	0		TXN	60.8346	0.510838	0	0		ST6GALNAC5	19.5568
ZNF146	37.7374	0.737086	1.27905e-284	3.32866e-283		ENSSSCG00000029761	87.2222	1.43606	0	0		COX5B	65.0193	0.516876	0	0		LYL1	18.427	2.09891	5.16904e-69	1.08379e-67		CYCS	10.4167	0.751561	1.22186e-22	1.65371e-21		PRNP	21.4227	0.892371	2.44467e-95	4.58789e-94		ENSSSCG00000033807	47.2221	1.56508	0	0		CXXC4	60.733	1.03374	0	0		TIMM22	19.5477
CDKN1C	37.704	1.5865	3.18364e-282	8.20512e-281		PLCL1	87.181	3.39655	0	0		AKAP7	64.8693	2.09694	0	0		MMP11	18.4146	1.88035	5.90399e-69	1.23497e-67		ENSSSCG00000008250	10.4037	2.30005	1.42466e-22	1.92134e-21		TMEM59	21.4034	0.452513	2.19028e-95	4.11337e-94		SLC30A8	47.1401	1.5097	0	0		ENSSSCG00000012527	60.6395	1.35029	0	0		PLCB4	19.5422
ENSSSCG00000038991	37.703	1.21625	5.9262e-283	1.53328e-281		PTPRG	86.9343	1.43004	0	0		GSN	64.8362	1.72931	0	0		TCAF1	18.3954	0.984319	6.35145e-69	1.32753e-67		HADH	10.3958	0.767493	1.44298e-22	1.94311e-21		ATP2A3	21.2863	1.73051	5.2368e-94	9.7387e-93		ADCY1	47.1098	1.82776	0	0		DNAJC24	60.4333	1.67503	0	0		ENSSSCG00000043549	19.4701
ILF3	37.6766	0.865436	2.55865e-283	6.63283e-282		TMED10	86.9095	1.03894	0	0		AJUBA	64.8148	4.11039	0	0		ENSSSCG00000049524	18.3695	1.3048	1.12159e-68	2.33511e-67		GINS2	10.3492	1.92882	2.22838e-22	2.97665e-21		PTOV1	21.261	0.565456	4.08665e-94	7.6051e-93		PEG10	47.0188	1.20438	0	0		CCDC85B	60.2784	1.17261	0	0		KRT10	19.4575
AIF1L	37.6142	1.5729	3.31176e-281	8.50241e-280		LIPC	86.573	6.69595	0	0		WWOX	64.7952	1.09017	0	0		PEX5L	18.2873	1.31661	3.66796e-68	7.59498e-67		PIN1	10.3468	0.755032	2.1775e-22	2.9116e-21		MIEN1	21.2098	0.696186	1.19903e-93	2.22359e-92		CHMP5	46.9931	0.879853	0	0		RAB1B	60.2622	1.01497	0	0		RCAN2	19.4218
PBX1	37.5241	0.6979	3.07476e-282	7.93216e-281		BAG1	86.443	1.66798	0	0		FAM102B	64.7831	2.90942	0	0		FZD3	18.1922	1.04431	1.46113e-67	3.00677e-66		DSTN	10.3381	0.512867	2.28601e-22	3.0521e-21		KCNIP1	21.034	3.2277	7.15978e-92	1.30686e-90		SDF4	46.9756	0.882707	0	0		ELAVL4	60.2439	1.57486	0	0		ENSSSCG00000040056	19.3809
NAALADL2	37.4865	0.942829	4.26048e-281	1.09276e-279		SPCS3	86.3182	1.04274	0	0		ENSSSCG00000032480	64.7344	1.6135	0	0		ENSSSCG00000038304	18.1555	0.863082	2.39298e-67	4.89788e-66		RTKN2	10.3215	2.33935	2.80508e-22	3.72831e-21		LMNA	21.0218	0.868796	4.98217e-92	9.1063e-91		COX6A1	46.8383	0.46467	0	0		GALNTL6	60.2246	2.68207	0	0		ENSSSCG00000033734	19.3782
ENSSSCG00000040203	37.3966	0.767707	6.176e-280	1.5795e-278		EGFR	86.0449	2.17851	0	0		SLC45A4	64.633	3.05862	0	0		ENSSSCG00000031589	18.1466	1.26631	3.13623e-67	6.41424e-66		RNASEH2B	10.3023	1.77871	3.25344e-22	4.31134e-21		ELAVL4	20.9598	1.18543	1.76792e-91	3.21593e-90		YWHAQ	46.8289	0.528858	0	0		ZNF385D	60.2082	3.97289	0	0		RAP1A	19.2607
SUCLG2	37.2428	0.78298	9.00265e-278	2.2958e-276		CKAP4	85.9829	1.9219	0	0		SLC31A1	64.6302	2.70064	0	0		ARID5A	18.1321	4.5575	5.13383e-67	1.04596e-65		MTSS1	10.2978	1.4141	3.35078e-22	4.43812e-21		KDELR3	20.9458	0.483559	1.10124e-91	2.00731e-90		NPTN	46.738	0.992592	0	0		AKAP9	60.1698	0.69382	0	0		NUDT16	19.2507
GAMT	37.1323	0.835816	5.36342e-277	1.36514e-275		ENSSSCG00000042004	85.6859	5.50413	0	0		ENSSSCG00000043817	64.6037	1.52263	0	0		ASPHD2	18.1262	3.05426	5.31315e-67	1.08167e-65		CENPI	10.2874	2.76969	3.72522e-22	4.92917e-21		GPD1	20.868	0.554306	5.93993e-91	1.07829e-89		RHBDD2	46.6715	1.04422	0	0		TSPAN3	60.1257	0.656678	0	0		HSPB1	19.2181
ZNF277	37.0747	0.832694	1.30933e-275	3.32625e-274		PYCR1	85.5814	2.60603	0	0		VCL	64.5409	1.86845	0	0		MAP4K4	18.1161	1.01081	4.47524e-67	9.13174e-66		CLSPN	10.2866	2.50855	3.74238e-22	4.94942e-21		ENSSSCG00000034230	20.813	0.482701	1.62765e-90	2.94269e-89		AP2A2	46.4971	1.12508	0	0		CELF3	60.1077	1.55941	0	0		ATP6V1B2	19.0643
PSMA4	36.9975	0.702144	1.61252e-274	4.08091e-273		TCEA3	85.1447	3.13147	0	0		CD200	64.4833	1.39689	0	0		AGFG2	18.1159	2.22744	5.89098e-67	1.19839e-65		ENSSSCG00000048264	10.2817	2.43104	3.89488e-22	5.14854e-21		GNAQ	20.7541	0.728917	6.32231e-90	1.14071e-88		TMEM51	46.2988	1.60593	0	0		PARK7	60.0885	0.489471	0	0		SRI	19.0473
TCF7L2	36.9774	0.845104	7.40576e-275	1.87601e-273		UXS1	84.9411	1.89052	0	0		DOCK1	64.4487	1.34675	0	0		GPC2	18.0829	4.08335	1.06849e-66	2.16535e-65		BUB1	10.2734	3.33429	4.19445e-22	5.53356e-21		MAML3	20.7006	0.778725	1.68109e-89	3.0229e-88		ENSSSCG00000002972	46.1498	1.34245	0	0		ENSSSCG00000045465	59.9482	2.47127	0	0		STK4	19.0426
ENSSSCG00000024660	36.8467	1.39959	6.21963e-271	1.55924e-269		ANKHD1	84.8226	1.28925	0	0		PHLDB2	64.2192	1.22666	0	0		DPYD	18.0637	0.991717	1.0808e-66	2.18863e-65		ENSSSCG00000013232	10.2698	0.822277	4.1306e-22	5.45202e-21		CBX6	20.6819	0.748147	2.19787e-89	3.94683e-88		CAMK2B	45.9834	1.8586	0	0		TCF4	59.8165	0.935652	0	0		SCP2	18.9885
ACOT13	36.8307	0.673572	3.96753e-273	9.99345e-272		AGAP1	84.7345	1.92125	0	0		RELCH	64.0947	1.52308	0	0		MYO1E	18.0448	1.00063	1.30508e-66	2.63477e-65		ENSSSCG00000012560	10.2663	0.928245	4.23626e-22	5.58319e-21		ANKRD44	20.6786	2.56087	4.50636e-89	8.07599e-88		DNAJC10	45.9826	1.17546	0	0		DAZAP1	59.7268	0.441746	0	0		CCDC181	18.9227
PRDX1	36.7539	0.713382	2.49505e-271	6.2668e-270		TYMS	84.34	1.41119	0	0		ssc-mir-9808	64.0919	2.84805	0	0		POLRMT	18.0142	2.04918	2.6612e-66	5.33221e-65		CCP110	10.2653	1.90028	4.4211e-22	5.82104e-21		ATP6AP1	20.6243	0.740674	6.75287e-89	1.20777e-87		PFN2	45.7904	0.782789	0	0		ENSSSCG00000032003	59.602	0.560726	0	0		PIN1	18.9152
BZW2	36.6875	1.08849	2.5079e-269	6.23442e-268		ZFHX3	84.1772	1.36724	0	0		TTLL4	63.7873	2.85909	0	0		ASAP2	17.946	1.50198	6.88877e-66	1.37409e-64		ENSSSCG00000048543	10.2575	1.02899	4.60421e-22	6.05614e-21		POLR2K	20.6205	0.60358	6.74006e-89	1.20629e-87		PRUNE1	45.6956	1.59824	0	0		PDE4D	59.4989	1.06132	0	0		FBXL2	18.8501
TIMP1	36.6383	1.29704	2.41358e-268	5.97209e-267		CCDC85A	83.8163	2.5814	0	0		ENSSSCG00000047806	63.3883	2.72153	0	0		PKN2	17.9325	1.13394	7.77238e-66	1.54803e-64		KIF2C	10.2521	3.06036	4.97928e-22	6.53338e-21		THOC5	20.5268	1.0415	4.93119e-88	8.7783e-87		TRAPPC2L	45.6034	0.751257	0	0		PCLO	59.4199	1.89915	0	0		ENSSSCG00000045461	18.8225
CLDN4	36.6256	0.927531	1.72981e-269	4.30819e-268		ALDH2	83.8151	2.38574	0	0		TIMP1	63.3161	1.56467	0	0		FYN	17.9235	1.29118	9.16293e-66	1.82226e-64		CHAF1A	10.2408	2.67557	5.45406e-22	7.14227e-21		ENSSSCG00000044714	20.5111	2.38032	9.28115e-88	1.6445e-86		IL6R	45.5939	4.77626	0	0		ZDHHC2	59.1803	1.71155	0	0		OLFM1	18.7602
CSRP2	36.5427	1.98073	4.35254e-266	1.06806e-264		CALR	83.695	1.18283	0	0		CA2	63.3091	1.67725	0	0		KDM5B	17.9062	1.09104	1.12346e-65	2.23259e-64		TRIM59	10.2314	1.83687	5.8446e-22	7.63869e-21		SMU1	20.5094	1.00581	6.82789e-88	1.21304e-86		CCDC88A	45.2973	1.28404	0	0		NAT14	59.1118	1.69686	0	0		CHL1	18.757
RSL1D1	36.5272	0.959719	2.19659e-267	5.42008e-266		BHLHA15	83.6025	4.35002	0	0		ERBB4	63.2635	4.28159	0	0		ENSSSCG00000032946	17.8879	1.12184	1.4958e-65	2.97031e-64		MAZ	10.2269	1.01224	5.91719e-22	7.72598e-21		PARK7	20.5089	0.357746	3.41204e-88	6.08618e-87		CFLAR	45.2807	0.890138	0	0		ENSSSCG00000012235	59.0801	1.57305	0	0		ENSSSCG00000024070	18.7434
BZW1	36.4786	0.790272	2.18695e-267	5.40131e-266		LACTB	83.3529	2.88279	0	0		TXN	63.2432	0.515291	0	0		MSI1	17.8541	2.17819	2.9869e-65	5.90052e-64		ENSSSCG00000030122	10.2036	1.81946	7.31201e-22	9.48213e-21		USP11	20.5008	1.08743	7.98362e-88	1.41648e-86		TUBA4A	45.1975	1.19521	0	0		ENSSSCG00000045731	59.0551	3.06069	0	0		LONP2	18.7239
TMEM165	36.3875	1.4039	8.70299e-265	2.12386e-263		CADPS2	83.2974	3.23782	0	0		PDE7B	63.1842	3.71444	0	0		KDM1A	17.8476	1.21185	2.82341e-65	5.58168e-64		RBP4	10.1177	2.17846	1.47332e-21	1.89308e-20		TPPP3	20.483	1.30129	1.18788e-87	2.10198e-86		ENSSSCG00000034868	45.153	0.826031	0	0		SLC29A4	59.0116	1.90526	0	0		CHMP5	18.6948
SRSF2	36.3423	0.646277	9.48055e-266	2.32426e-264		POLR1D	82.9096	0.909729	0	0		TM4SF4	63.1797	1.22878	0	0		RAB1A	17.8335	0.611125	2.71749e-65	5.38027e-64		PSMC3IP	10.1145	3.24353	1.53106e-21	1.96443e-20		ENSSSCG00000016990	20.4383	0.474665	1.49834e-87	2.64958e-86		ARL4D	45.1469	3.00592	0	0		ABAT	58.9598	2.96923	0	0		ENSSSCG00000049532	18.5533
LMNB1	36.3097	1.45015	1.0434e-263	2.52549e-262		ADI1	82.7807	1.12951	0	0		ENSSSCG00000006581	63.1352	1.37264	0	0		SLAIN1	17.8142	1.88298	5.25717e-65	1.0347e-63		RAD51	10.1141	2.655	1.52708e-21	1.96027e-20		ENSSSCG00000024791	20.4191	1.22309	3.69944e-87	6.5289e-86		LAMTOR5	45.1213	0.950111	0	0		ENSSSCG00000035525	58.8984	3.24378	0	0		STXBP1	18.5378
DKC1	36.237	1.26031	4.3818e-263	1.0577e-261		ENSSSCG00000009348	82.5122	2.23116	0	0		ENSSSCG00000051482	63.1207	1.99226	0	0		GCC2	17.7838	0.909157	6.64193e-65	1.30532e-63		GTSE1	10.1116	3.8895	1.5706e-21	2.01225e-20		RTL5	20.4117	1.36238	4.39411e-87	7.74463e-86		ENSSSCG00000011489	45.0014	1.21717	0	0		ENSSSCG00000016444	58.6505	0.949882	0	0		FANCF	18.5301
H2AZ2	36.1959	0.586904	8.81683e-264	2.136e-262		ENSSSCG00000020872	82.5006	2.71624	0	0		ENSSSCG00000035189	63.1023	3.01649	0	0		NEUROD2	17.7743	7.86844	1.12643e-64	2.2056e-63		CSRP2	10.1075	1.92512	1.59956e-21	2.04739e-20		LIN7B	20.4023	1.21295	4.95142e-87	8.72111e-86		HOGA1	44.8764	1.35998	0	0		THRB	58.5729	1.08192	0	0		ENSSSCG00000002449	18.433
SNORD15-1	36.0758	0.649502	3.75033e-263	9.0692e-262		NAP1L1	82.0326	0.829054	0	0		LAD1	62.7729	1.90917	0	0		ESRP1	17.7376	1.2617	1.49353e-64	2.92226e-63		CNIH1	10.1063	1.11152	1.58581e-21	2.03077e-20		ATP6V0D1	20.3803	0.763815	5.57219e-87	9.80801e-86		ENSSSCG00000010190	44.8227	2.9677	0	0		ZNF862	58.552	1.02649	0	0		ENSSSCG00000050174	18.4258
ENSSSCG00000042504	36.0669	1.50857	1.19729e-260	2.86931e-259		ROR1	81.8599	1.4119	0	0		NR5A2	62.7701	1.13497	0	0		ENSSSCG00000051044	17.6992	1.82203	2.90161e-64	5.65242e-63		CAMTA2	10.1032	0.784735	1.60883e-21	2.05827e-20		RAP1GAP2	20.3797	1.10404	7.08875e-87	1.24609e-85		APLP1	44.7455	1.13351	0	0		PCDHAC2	58.3866	2.27783	0	0		CAPZB	18.4241
ENSSSCG00000041231	36.031	2.76074	8.18271e-259	1.94004e-257		DDX21	81.5811	1.58225	0	0		SNRPG	62.5182	0.699352	0	0		TERF1	17.5796	1.32337	1.58104e-63	3.0465e-62		TUBA4A	10.0905	1.18638	1.8133e-21	2.31431e-20		ENSSSCG00000002891	20.358	1.00639	9.47496e-87	1.65899e-85		KBTBD8	44.7018	2.68434	0	0		ENSSSCG00000012520	58.3394	0.944552	0	0		UBE2V2	18.4118
FAM162A	35.992	0.592986	2.15337e-261	5.17917e-260		FANCE	81.5438	1.77439	0	0		RALGAPA2	62.344	1.68312	0	0		YWHAQ	17.5405	0.43967	1.90836e-63	3.6719e-62		CDCA5	10.0792	3.46569	2.04021e-21	2.59521e-20		ENHO	20.2515	1.13639	7.26324e-86	1.26343e-84		AP2S1	44.656	0.782533	0	0		ENSSSCG00000014037	58.1119	2.32516	0	0		ENTPD3	18.4085
CKB	35.9466	1.06745	1.91238e-259	4.55027e-258		ENSSSCG00000031750	81.1879	3.25417	0	0		NEURL1	62.2413	1.26963	0	0		ZFAND5	17.5237	0.871762	3.18375e-63	6.09948e-62		CHN1	10.0755	1.80957	2.06338e-21	2.62343e-20		SLC29A4	20.2471	1.37698	8.54981e-86	1.48626e-84		EFS	44.5445	4.51372	0	0		KRT10	57.9105	0.756928	0	0		MIEN1	18.4052
UNC119	35.9395	1.24968	4.2792e-259	1.01546e-257		ZMYM1	81.0433	1.46873	0	0		ENSSSCG00000044899	62.2084	1.78859	0	0		PDZRN4	17.5157	2.6235	4.76149e-63	9.08947e-62		MCM4	10.066	1.95384	2.24456e-21	2.8497e-20		GRIA1	20.2247	3.3598	1.76397e-85	3.05645e-84		ENSSSCG00000027907	44.5321	0.712365	0	0		C1orf210	57.8864	1.09809	0	0		ENSSSCG00000041486	18.3851
ENSSSCG00000016571	35.8872	2.19843	2.34005e-257	5.51857e-256		ENSSSCG00000048263	80.8962	1.39045	0	0		ENPP1	62.1811	2.19515	0	0		ZEB1	17.5132	1.18053	3.93406e-63	7.52612e-62		MSMO1	10.0586	1.16826	2.33631e-21	2.96477e-20		BTBD3	20.2093	1.10693	1.56962e-85	2.72145e-84		GNG10	44.5302	0.803527	0	0		CLRN3	57.8548	2.70063	0	0		CFL1	18.3326
CAPG	35.8779	1.62787	7.13583e-258	1.69033e-256		MGST2	80.7693	0.832874	0	0		TLR3	62.0959	2.75733	0	0		PSMB2	17.4918	0.605238	4.61536e-63	8.82315e-62		KIF11	10.0295	2.89607	3.03932e-21	3.83862e-20		DUSP19	20.1683	1.27914	3.50312e-85	6.04236e-84		LY6H	44.4332	1.62586	0	0		PRPS2	57.8373	0.843972	0	0		PLD3	18.33
LXN	35.8274	1.34805	1.53764e-257	3.63589e-256		ENSSSCG00000032056	80.7654	3.79767	0	0		UNC13D	62.0578	2.75212	0	0		MYCL	17.4809	4.20991	8.50455e-63	1.61884e-61		RAB3C	10.022	1.15093	3.11939e-21	3.93787e-20		ENSSSCG00000029752	20.0965	1.89827	1.45617e-84	2.50196e-83		ENSSSCG00000021977	44.4328	1.37796	0	0		VPS28	57.5688	0.682605	0	0		ANKRD40CL	18.2534
ENSSSCG00000012961	35.8273	0.456247	1.11613e-259	2.65806e-258		SUCLG1	80.6828	0.79736	0	0		PDE3A	62.0286	1.85713	0	0		CEP170	17.4751	1.59532	7.75396e-63	1.47702e-61		ENSSSCG00000010058	10.0027	0.618313	3.61706e-21	4.5575e-20		CP	20.018	3.06572	6.80824e-84	1.16303e-82		ENSSSCG00000002449	44.2542	0.621346	0	0		ENSSSCG00000003046	57.533	0.524454	0	0		FFAR4	18.2034
PPA1	35.7079	0.909919	3.05233e-257	7.18566e-256		ENSSSCG00000029857	80.6717	1.37603	0	0		FMO5	62.0202	2.65158	0	0		ENSSSCG00000026512	17.4674	4.16351	1.03508e-62	1.96047e-61		KHDRBS1	9.98691	0.67672	4.08392e-21	5.12635e-20		CCDC85B	19.9968	0.863482	6.10108e-84	1.04424e-82		ISCU	44.22	0.710959	0	0		GSTM3	57.4254	0.918374	0	0		NELL1	18.1775
ENSSSCG00000034709	35.6774	0.661018	2.44842e-257	5.76905e-256		TST	80.5307	1.20114	0	0		CEBPD	61.8875	3.37292	0	0		ARID4B	17.4446	0.703127	9.61456e-63	1.82232e-61		ENSSSCG00000035728	9.95098	0.669097	5.51257e-21	6.85829e-20		SLC34A3	19.9841	1.1551	8.40936e-84	1.43562e-82		ANKRD46	44.1988	1.11074	0	0		FAM204A	57.3736	0.836123	0	0		RASGRP1	18.0835
APEX1	35.6692	1.21881	1.23e-255	2.88287e-254		ZNF277	80.5144	1.25599	0	0		RGS17	61.7129	1.60213	0	0		ABCA5	17.4047	1.20205	2.05415e-62	3.86863e-61		LSM2	9.9496	0.821827	5.56177e-21	6.91627e-20		PRKCA	19.9683	0.850641	1.01434e-83	1.73054e-82		PPP2CA	44.1899	0.77921	0	0		PTPRD	57.2905	2.44916	0	0		HPCA	18.0674
ENSSSCG00000048531	35.6583	2.3288	2.1819e-254	5.06493e-253		ENSSSCG00000009952	80.4096	4.21012	0	0		NEK6	61.6044	2.22236	0	0		ISL1	17.3848	1.7782	3.1998e-62	5.99658e-61		DCLK1	9.94307	2.50656	6.07442e-21	7.53969e-20		ENSSSCG00000010073	19.9678	0.535467	6.71196e-84	1.14732e-82		CST6	44.0738	1.88266	0	0		FANCF	57.2397	1.35373	0	0		STXBP6	18.04
HNRNPD	35.5792	0.712699	1.06009e-255	2.48681e-254		ENSSSCG00000044841	80.0694	2.13708	0	0		XYLT1	61.5667	1.88712	0	0		PSMA4	17.3789	0.612071	2.40799e-62	4.52223e-61		SLC29A1	9.93124	1.7182	6.61774e-21	8.20261e-20		MCRIP1	19.9584	0.616561	1.02887e-83	1.75422e-82		ENSSSCG00000034415	43.9956	0.608299	0	0		ENSSSCG00000024009	57.2149	1.22789	0	0		ENSSSCG00000042754	17.978
RBMS1	35.5607	0.930155	3.95874e-255	9.22979e-254		SNORA8	80.0295	2.03094	0	0		COL4A5	61.5624	2.29116	0	0		ENSSSCG00000033807	17.3454	1.19785	4.81528e-62	8.99876e-61		IVD	9.91548	1.31417	7.48048e-21	9.21624e-20		B3GAT2	19.939	1.20299	1.96822e-83	3.34297e-82		PTPRT	43.9817	2.95582	0	0		SLC24A2	57.2013	3.6047	0	0		ARFGEF3	17.9547
TNIK	35.5161	1.19557	8.77737e-254	2.02693e-252		CTSC	79.8926	3.13157	0	0		CA4	61.514	3.65219	0	0		MBD4	17.3442	1.56223	5.36579e-62	1.00065e-60		PIMREG	9.90526	3.96112	8.29867e-21	1.0196e-19		ENSSSCG00000041267	19.913	1.05123	2.9206e-83	4.95108e-82		ENSSSCG00000001038	43.9686	0.619351	0	0		MAGEF1	57.1718	1.17187	0	0		ANXA6	17.9398
ENSSSCG00000035209	35.4761	1.24445	4.4025e-253	1.01402e-251		CALD1	79.7858	1.27752	0	0		ENSSSCG00000010893	61.4415	3.34835	0	0		NFIC	17.3072	1.04036	8.35232e-62	1.55325e-60		ENSSSCG00000026719	9.87052	1.38885	1.0706e-20	1.31114e-19		ROGDI	19.9095	1.00607	3.07506e-83	5.20961e-82		MRAP2	43.7906	4.21105	0	0		SNRPN	56.9991	0.70486	0	0		NPTN	17.849
TP53	35.4303	1.1736	1.03598e-252	2.37999e-251		ENSSSCG00000021991	79.7557	0.988767	0	0		ENSSSCG00000046918	61.4139	2.10779	0	0		AFAP1	17.3052	2.22	1.02101e-61	1.89741e-60		FUS	9.85839	0.633571	1.14573e-20	1.40058e-19		ENSSSCG00000020790	19.8898	0.403336	2.84407e-83	4.82748e-82		IGFBP2	43.7704	1.16891	0	0		ENSSSCG00000013902	56.998	0.854421	0	0		CHD7	17.8003
SERPINF1	35.248	1.75204	1.7639e-249	4.01077e-248		ENSSSCG00000032552	79.5839	1.68275	0	0		RAPGEF5	61.3418	1.85497	0	0		ENSSSCG00000050065	17.2751	1.16143	1.34878e-61	2.50129e-60		TYMS	9.83493	0.976761	1.40347e-20	1.71015e-19		SCN7A	19.8886	2.6156	6.5172e-83	1.09992e-81		TMEM179	43.7368	1.88528	0	0		DDAH1	56.9285	2.32591	0	0		TMEM86A	17.7925
ID4	35.2459	1.26775	4.35353e-250	9.92449e-249		IL22RA1	79.4833	4.50651	0	0		LRP2	61.3137	6.0734	0	0		TRMT6	17.2746	1.57689	1.5261e-61	2.82817e-60		CASP8AP2	9.83379	1.48582	1.43675e-20	1.74911e-19		H2AW	19.8655	1.47688	8.17889e-83	1.37775e-81		RYR2	43.7122	3.3305	0	0		ENSSSCG00000033386	56.8773	2.1726	0	0		RGS2	17.6782
SMARCA4	35.1505	1.0379	3.21797e-249	7.30458e-248		SURF4	79.0792	1.16025	0	0		COL4A4	61.3022	4.73888	0	0		ZBTB18	17.1928	1.389	4.81116e-61	8.84225e-60		TIMELESS	9.82356	2.20394	1.57737e-20	1.91593e-19		PCSK1	19.8267	1.07748	1.29016e-82	2.17055e-81		CHID1	43.5053	0.777828	0	0		TMEM59	56.838	0.559771	0	0		VSTM2A	17.6716
PHB	35.0788	0.676705	4.02258e-249	9.12322e-248		GJB1	78.7051	1.95811	0	0		TCIM	61.036	2.13282	0	0		PSMD11	17.1865	0.901267	4.66593e-61	8.58718e-60		PDIA3	9.788	0.571393	1.98756e-20	2.40647e-19		ENSSSCG00000023160	19.8108	1.57825	2.19663e-82	3.68859e-81		ENSSSCG00000024791	43.5033	1.53766	0	0		FSD1L	56.7281	1.18438	0	0		ABCC8	17.6669
ERG28	35.0561	1.03187	5.6909e-248	1.28741e-246		EIF3A	78.3713	1.09461	0	0		STRIP1	61.0054	1.78146	0	0		JMJD1C	17.1823	0.685137	4.58274e-61	8.4399e-60		TRIM37	9.76283	1.67202	2.54477e-20	3.06442e-19		CMIP	19.7816	0.765536	2.68567e-82	4.50128e-81		WNK3	43.461	2.05806	0	0		PRLHR	56.7085	2.44957	0	0		ENSSSCG00000010190	17.6645
GNG10	35.0358	0.721244	1.6069e-248	3.64135e-247		PCBP2	78.0066	0.805986	0	0		KIFC3	61.0033	3.44309	0	0		ENSSSCG00000000530	17.1486	0.992241	8.39489e-61	1.53968e-59		DEPDC1	9.74909	3.08525	2.87344e-20	3.44618e-19		NCAM1	19.7313	1.26242	8.00372e-82	1.33557e-80		TSPAN3	43.4275	0.626198	0	0		NPDC1	56.6806	1.72086	0	0		GJD2	17.6338
TGIF1	35.0255	1.44655	4.54723e-247	1.0252e-245		MRPS26	77.9892	0.997542	0	0		SHANK2	61.0022	2.06782	0	0		TBC1D8	17.1179	1.66188	1.47055e-60	2.68784e-59		COL1A1	9.74185	3.97629	3.05801e-20	3.6626e-19		BEX1	19.6753	0.35542	1.00737e-81	1.67994e-80		GLUL	43.4001	0.952147	0	0		GORASP2	56.5828	1.01396	0	0		SEMA3E	17.6286
HMGB2	34.9775	1.26823	2.96384e-246	6.64843e-245		INSIG1	77.9192	2.47147	0	0		BMP7	60.9864	2.48534	0	0		OLFM1	17.0798	1.91748	2.70041e-60	4.90546e-59		TMPO	9.73188	1.256	3.2185e-20	3.8479e-19		PDE3B	19.6693	0.912748	2.0745e-81	3.45089e-80		EMC10	43.2798	1.06252	0	0		CHMP5	56.5325	0.813191	0	0		LEPROTL1	17.6271
MRPL13	34.9406	0.982761	1.46817e-246	3.29614e-245		FAM126A	77.7503	1.93083	0	0		SYNE2	60.7738	0.980947	0	0		CCT3	17.0687	0.599075	2.27865e-60	4.1478e-59		COL3A1	9.70324	3.59881	4.15232e-20	4.93996e-19		TUBB2B	19.6384	0.75398	2.82918e-81	4.69458e-80		FSD1L	43.1755	1.1703	0	0		NSG2	56.4301	3.12685	0	0		PCMT1	17.6
ABCB9	34.9193	2.38996	9.64116e-245	2.15724e-243		DNAJB1	77.746	1.20476	0	0		HEBP1	60.6824	1.29709	0	0		ENSSSCG00000002547	17.0639	0.817768	2.66655e-60	4.84727e-59		B2M	9.69695	0.804458	4.15755e-20	4.94398e-19		PRKD1	19.6378	2.11289	5.04108e-81	8.34409e-80		ENSSSCG00000010073	43.1675	0.71034	0	0		MNS1	56.2376	1.46564	0	0		MCRIP1	17.5977
ENSSSCG00000036350	34.8637	0.387817	9.28565e-247	2.08821e-245		MANF	77.5496	0.962374	0	0		EPHA3	60.3681	2.80829	0	0		PIN1	17.0518	0.668899	3.00221e-60	5.45e-59		HYLS1	9.67902	2.92827	5.00396e-20	5.91355e-19		APP	19.5663	0.614307	1.03363e-80	1.70452e-79		GPD2	43.0099	1.58297	0	0		BCAS4	55.9255	1.23361	0	0		ENSSSCG00000046704	17.5795
BVES	34.8076	2.07068	1.09668e-243	2.44359e-242		TLN2	77.2685	2.67457	0	0		PLAT	60.364	4.44925	0	0		CPLX2	17.0202	1.16838	5.59658e-60	1.01251e-58		ENSSSCG00000020808	9.67504	0.825679	4.98054e-20	5.88848e-19		PNKD	19.5627	0.517156	1.0131e-80	1.67171e-79		GRB2	42.7567	0.921328	0	0		UNC5D	55.9075	3.7198	0	0		NKX3-1	17.5522
RPL23	34.7458	0.236703	1.87375e-251	4.28615e-250		FAM131C	77.2524	1.51922	0	0		SLC38A2	60.2734	1.33404	0	0		ENSSSCG00000013391	17.0038	0.696361	6.23589e-60	1.12588e-58		ENSSSCG00000009670	9.67157	3.66412	5.32309e-20	6.27677e-19		PIP5K1B	19.5618	1.2117	1.57531e-80	2.59138e-79		VIL1	42.7193	0.984591	0	0		GAPDH	55.7935	0.453546	0	0		PSD	17.5338
CTSH	34.6793	1.16111	6.27775e-243	1.39413e-241		ENSSSCG00000023305	77.2348	5.0969	0	0		DUSP6	60.2667	2.51706	0	0		ACTR3	16.9776	0.902218	9.7937e-60	1.75752e-58		ENSSSCG00000007609	9.67008	0.596732	5.11833e-20	6.038e-19		KLHDC9	19.5312	1.06179	2.575e-80	4.23065e-79		ENSSSCG00000008480	42.7176	0.823881	0	0		MIDEAS	55.7023	1.41109	0	0		RADX	17.5324
ARG2	34.675	1.83096	5.80188e-242	1.28204e-240		HSP90AA1	77.1881	0.624088	0	0		PDE8A	60.0544	1.96849	0	0		UBE2V2	16.8919	0.73711	3.20501e-59	5.70543e-58		CALM3	9.66474	0.739666	5.43993e-20	6.40321e-19		CCDC3	19.4876	3.03226	7.62077e-80	1.24669e-78		ENSSSCG00000024070	42.4858	1.3409	0	0		IL6ST	55.6937	1.37521	0	0		ENSSSCG00000034230	17.5021
SEPTIN6	34.6367	1.38515	3.8271e-242	8.46377e-241		CDH3	76.971	1.90905	0	0		MRTFA	60.0454	1.72644	0	0		SETBP1	16.8899	0.937812	3.58642e-59	6.37589e-58		CDCA2	9.66097	3.14964	5.77467e-20	6.79123e-19		SCG3	19.3812	0.912274	2.87757e-79	4.69017e-78		MORF4L1	42.4709	0.689068	0	0		PLCXD3	55.6842	2.7724	0	0		MORF4L1	17.4916
SRSF9	34.5451	0.651423	3.06444e-242	6.78274e-241		SSRP1	76.7245	1.28935	0	0		SYNGR1	59.9781	1.52319	0	0		C6orf52	16.8626	1.13931	5.67898e-59	1.00424e-57		ENSSSCG00000035209	9.65821	1.28479	5.79393e-20	6.81087e-19		SCLY	19.3327	0.994795	7.7237e-79	1.25659e-77		ENSSSCG00000032953	42.4461	2.80152	0	0		GPD2	55.6397	1.57587	0	0		PCBP4	17.4727
SNORD58-1	34.531	0.757154	2.48816e-242	5.51181e-241		ENSSSCG00000048201	76.5327	1.46158	0	0		ENSSSCG00000043109	59.9374	3.45579	0	0		NBL1	16.8304	1.56698	9.43571e-59	1.66194e-57		POLH	9.64808	1.88247	6.32636e-20	7.42366e-19		ATP5MG	19.2846	0.245353	9.52139e-79	1.54528e-77		ATP2A3	42.3452	2.08989	0	0		ISL1	55.5425	1.26044	0	0		ECHDC1	17.4659
PHF5A	34.5293	0.726158	8.24427e-242	1.82023e-240		FKBP4	76.3562	1.03415	0	0		MYO10	59.9248	1.93495	0	0		TMED8	16.8267	1.24005	9.39345e-59	1.6556e-57		ENSSSCG00000033307	9.64262	2.80681	6.667e-20	7.80962e-19		GABRG2	19.2472	4.42372	5.19227e-78	8.3809e-77		GAPDH	42.3308	0.42476	0	0		DBI	55.4903	0.562789	0	0		CNTN3	17.4594
ENSSSCG00000020808	34.4104	0.845977	4.91949e-240	1.08079e-238		ENSSSCG00000001696	76.1971	0.897589	0	0		ATP5PF	59.8695	0.458387	0	0		KRAS	16.7873	0.953214	1.56852e-58	2.75722e-57		CACYBP	9.63871	0.66331	6.56643e-20	7.6952e-19		RAC3	19.2324	0.666644	3.71836e-78	6.01277e-77		RAB4A	42.2553	1.17627	0	0		FRZB	55.4376	2.85506	0	0		UCHL1	17.4518
PTBP1	34.3499	0.755353	1.80982e-239	3.96626e-238		EIF3M	76.1008	1.0801	0	0		RND3	59.7892	1.84403	0	0		HPS4	16.7872	1.80985	1.80536e-58	3.17147e-57		JAZF1	9.63783	1.11822	6.73185e-20	7.87865e-19		LRP11	19.2201	1.19435	5.7634e-78	9.29714e-77		MAGEF1	42.2492	1.14106	0	0		SYT4	55.415	2.35135	0	0		SSTR3	17.4466
EPCAM	34.3181	0.447299	9.2787e-240	2.03513e-238		TXNDC11	75.587	1.65923	0	0		MTERF3	59.6473	0.692547	0	0		SFRP2	16.7692	3.30268	2.57835e-58	4.51745e-57		TMED5	9.62582	1.10276	7.42333e-20	8.66131e-19		ssc-mir-9860	19.1968	1.02839	8.40266e-78	1.35382e-76		ZNF862	42.1961	0.968705	0	0		ENSSSCG00000041677	55.3981	1.26808	0	0		ISG12(A)	17.4285
ARHGEF19	34.3138	1.4584	5.88277e-238	1.27767e-236		DNAJC22	75.3744	1.74324	0	0		HIPK2	59.5735	1.01937	0	0		RPF2	16.7665	1.23177	2.28276e-58	4.0022e-57		SNRNP25	9.62095	0.613197	7.59857e-20	8.85415e-19		SSBP4	19.1621	0.854497	1.40878e-77	2.26434e-76		RCAN2	42.1544	1.55459	0	0		ENSSSCG00000022295	55.3809	0.96005	0	0		KLHL15	17.4119
LSM4	34.2922	0.87462	2.5465e-238	5.53521e-237		FBL	75.3569	1.64549	0	0		SCARB2	59.4048	1.20119	0	0		PALM	16.757	1.56156	2.72795e-58	4.77641e-57		ATAD5	9.61528	2.14769	8.22717e-20	9.57405e-19		ADGRG1	19.1603	1.39515	1.74978e-77	2.81072e-76		ACVR1C	42.1045	2.57691	0	0		P2RY1	55.3444	4.68461	0	0		PLCE1	17.3391
CCT8	34.2847	0.671629	7.60781e-239	1.66181e-237		EIF3D	75.3544	1.03812	0	0		FBLN1	59.397	2.2336	0	0		ZSWIM6	16.6988	1.33712	6.02527e-58	1.05083e-56		GNB2	9.60484	0.486235	8.48203e-20	9.85772e-19		ENSSSCG00000012527	19.1296	0.943986	2.52641e-77	4.05336e-76		RNPEP	42.0519	1.43239	0	0		ADRA2A	55.2904	2.80293	0	0		SYT4	17.3222
MGP	34.2754	4.4137	6.95696e-236	1.49634e-234		STK24	74.4317	1.86782	0	0		RHOV	59.2955	1.89382	0	0		MEGF11	16.6958	2.93985	7.36285e-58	1.28076e-56		POC1A	9.59437	1.85896	9.651e-20	1.1187e-18		ENSSSCG00000050682	19.0625	1.65513	9.92523e-77	1.58382e-75		ENSSSCG00000041677	42.009	1.2432	0	0		CHD7	55.2158	0.98807	0	0		RPS6KA3	17.3137
PLCB1	34.2094	0.904143	8.02091e-238	1.73921e-236		ZNF704	73.9473	1.7865	0	0		ENSSSCG00000005094	58.9601	1.22983	0	0		YPEL1	16.6829	1.90268	8.15758e-58	1.41623e-56		SRSF10	9.59011	0.775545	9.74402e-20	1.1285e-18		ENSSSCG00000036505	19.035	1.04736	1.17059e-76	1.86686e-75		TMEM9B	42.0044	1.05029	0	0		ENSSSCG00000026140	55.183	1.27708	0	0		ITGA4	17.3116
ENSSSCG00000016679	34.1942	1.15366	1.21279e-236	2.6191e-235		FAM174B	73.9445	2.1019	0	0		ENSSSCG00000039894	58.8978	1.51236	0	0		MPZL1	16.6753	0.865916	7.93699e-58	1.37883e-56		ACVR1C	9.58654	2.16305	1.02969e-19	1.18892e-18		TMTC2	19.0311	1.18397	1.50817e-76	2.40378e-75		NDUFA6	42.0026	0.677067	0	0		SLC16A11	54.9044	1.85198	0	0		GCNT2	17.2652
ENSSSCG00000047605	34.1857	1.74289	4.73344e-236	1.01974e-234		PKIB	73.9235	1.01588	0	0		ENSSSCG00000045954	58.8828	2.35202	0	0		SKP1	16.6714	0.411439	6.33526e-58	1.10345e-56		DPP10	9.5802	1.40335	1.06816e-19	1.2328e-18		DUSP10	18.9797	1.68226	4.08305e-76	6.49219e-75		ST6GALNAC4	41.9106	1.46122	0	0		SOBP	54.7197	1.67536	0	0		OPTN	17.2241
ARL6IP6	34.0785	0.855416	8.38305e-236	1.80161e-234		CST3	73.7738	0.798792	0	0		NOTCH3	58.7706	2.65802	0	0		MED27	16.6477	1.12995	1.20753e-57	2.08957e-56		KIF18B	9.56864	3.79988	1.19772e-19	1.37935e-18		USH1C	18.9472	0.840158	5.39863e-76	8.57378e-75		HPN	41.7723	0.818442	0	0		SLC4A10	54.6953	4.61102	0	0		GUCY1A1	17.2071
ENSSSCG00000004963	34.0429	0.782169	2.25257e-235	4.83323e-234		ARFGAP3	73.7542	1.38121	0	0		PLPPR5	58.7056	3.55923	0	0		NECTIN3	16.6403	0.937756	1.2952e-57	2.23984e-56		NUDT1	9.54787	1.3596	1.38312e-19	1.58669e-18		ENSSSCG00000050754	18.9343	1.27307	7.99236e-76	1.26779e-74		ELF2	41.7657	1.04557	0	0		ENSSSCG00000047961	54.6396	1.94848	0	0		GPX1	17.2032
CNN3	34.0339	0.844447	1.14629e-235	2.46152e-234		H2AJ	73.5446	0.893706	0	0		ZC3H7B	58.5808	1.1017	0	0		SNRPD1	16.598	0.56372	2.03178e-57	3.50452e-56		HMGCR	9.54072	1.37629	1.46329e-19	1.6765e-18		MEF2A	18.9015	0.812431	1.24351e-75	1.97017e-74		NDFIP1	41.746	0.641534	0	0		STXBP1	54.5943	1.49413	0	0		ENSSSCG00000037479	17.1981
PDCD5	33.9636	0.72197	1.49484e-234	3.19455e-233		QSOX2	73.4991	2.35795	0	0		ENSSSCG00000038991	58.42	1.30618	0	0		BORCS5	16.5979	0.96044	2.36707e-57	4.07757e-56		TSPAN13	9.53878	0.902525	1.46652e-19	1.67947e-18		ENSSSCG00000043604	18.8808	0.900424	1.79043e-75	2.83164e-74		NAA20	41.6836	0.733806	0	0		LIMCH1	54.5818	0.964356	0	0		ENSSSCG00000022058	17.1899
SIVA1	33.9459	0.687392	2.18146e-234	4.65814e-233		ENSSSCG00000016687	73.4342	1.76	0	0		PPP1R13B	58.4153	2.38399	0	0		ACTG1	16.5098	0.319085	6.4897e-57	1.11218e-55		PFKP	9.52949	1.22915	1.58659e-19	1.81542e-18		HSPB8	18.8507	1.08184	3.17722e-75	5.01302e-74		KRT18	41.644	0.536225	0	0		CAMK2B	54.5331	1.74393	0	0		CBFB	17.1583
KLHL23	33.9178	0.957788	6.02148e-234	1.28066e-232		SNTB1	73.3456	1.71887	0	0		HAS1	58.2886	1.38721	0	0		STARD5	16.45	2.67125	2.3823e-56	4.04112e-55		XRCC2	9.52746	2.38646	1.64184e-19	1.87622e-18		ALDH4A1	18.8458	1.83644	4.13997e-75	6.5166e-74		MPP6	41.497	1.98797	0	0		RUFY3	54.452	1.4789	0	0		MED25	17.1073
TIPARP	33.8612	1.25323	1.80364e-232	3.82684e-231		SMTN	73.1327	2.71401	0	0		TNFRSF19	58.2431	2.81689	0	0		SQSTM1	16.4346	0.726307	2.26815e-56	3.85239e-55		MEAF6	9.52263	1.1444	1.67672e-19	1.91526e-18		YWHAH	18.8216	0.608297	4.10989e-75	6.47308e-74		STK25	41.4413	0.857311	0	0		KIFAP3	54.2553	1.15701	0	0		RAB2A	17.0952
NPM3	33.8048	1.61777	3.2047e-231	6.7672e-230		AIMP1	73.0315	0.885974	0	0		TGFBR2	58.1405	2.85032	0	0		MARCHF5	16.4202	1.23468	3.15108e-56	5.33502e-55		EMC7	9.51371	0.915991	1.77984e-19	2.0287e-18		CCDC28B	18.8116	1.27381	6.62756e-75	1.04138e-73		RAB3D	41.3735	1.24877	0	0		CTSD	54.2045	0.828592	0	0		RSPO3	17.0924
RNF182	33.6662	3.02632	1.15836e-228	2.43448e-227		COQ8A	72.8858	1.65594	0	0		ENSSSCG00000013568	58.0903	2.02881	0	0		GSS	16.4026	1.10306	3.96549e-56	6.70961e-55		HMGN1	9.50324	0.411796	1.91892e-19	2.18069e-18		ENSSSCG00000040134	18.7963	1.18764	8.28949e-75	1.30175e-73		PFN1	41.3644	0.602306	0	0		DPYSL2	54.1647	1.66276	0	0		GLYCTK	17.074
POP7	33.635	0.768883	2.34515e-230	4.9443e-229		PDIA6	72.689	0.830378	0	0		MRPS25	58.0824	1.23522	0	0		KIF5B	16.3874	0.69478	4.37148e-56	7.39184e-55		C15orf48	9.49256	1.06058	2.09636e-19	2.37727e-18		PGAP1	18.7894	0.981121	8.69584e-75	1.36476e-73		SCN9A	41.3581	1.27246	0	0		MINDY1	53.7258	1.04427	0	0		TP53I13	17.0613
C12orf49	33.6327	0.754005	1.38598e-230	2.92439e-229		ENSSSCG00000035083	72.6735	4.14764	0	0		CEBPB	58.0663	2.82601	0	0		CACNB3	16.3497	2.03795	9.40514e-56	1.58631e-54		ENSSSCG00000000377	9.48574	0.850082	2.21967e-19	2.51496e-18		MAD2L2	18.7724	0.937888	1.16104e-74	1.82004e-73		CYCS	41.2898	0.744233	0	0		TNR	53.5466	2.37063	0	0		PARK7	17.0438
SNRPA1	33.3748	1.043	1.80134e-226	3.74737e-225		PHGDH	72.5751	1.84892	0	0		ENSSSCG00000041895	58.0108	3.10819	0	0		RIMS3	16.3286	3.19405	1.3503e-55	2.2746e-54		EFNA5	9.47937	1.08923	2.35009e-19	2.6616e-18		NCKAP1	18.7523	0.852076	1.58353e-74	2.4765e-73		ENSSSCG00000034230	41.2016	0.561778	0	0		CDK5R2	53.4223	1.76396	0	0		ENSSSCG00000026140	17.0371
BTG1	33.2723	0.50173	4.68769e-227	9.78247e-226		TMTC4	72.4928	1.54089	0	0		DRP2	57.7998	5.91921	0	0		NDUFB4	16.3244	0.426966	9.55189e-56	1.61005e-54		TROAP	9.46362	4.12792	2.72771e-19	3.07361e-18		RTN4	18.7504	0.572643	1.20499e-74	1.88782e-73		C5orf15	41.1941	0.911018	0	0		ENSSSCG00000003225	53.3326	2.48352	0	0		COX17	17.0071
PTGR1	33.1389	1.4398	3.42993e-223	7.04192e-222		LMAN1	72.3539	1.1116	0	0		CA8	57.7641	2.01774	0	0		ENSSSCG00000041180	16.3155	1.3656	1.43693e-55	2.419e-54		GEM	9.46222	2.60462	2.74147e-19	3.0878e-18		MTMR7	18.7492	0.864088	1.56815e-74	2.45389e-73		ENSSSCG00000006324	41.1862	0.816309	0	0		CFLAR	53.2781	0.84378	0	0		RET	17.0047
PRSS23	33.1351	1.25024	3.72204e-223	7.63577e-222		MRPL52	72.2773	0.972487	0	0		ZDHHC14	57.6773	1.14188	0	0		MAP6	16.2922	1.93444	2.09283e-55	3.5143e-54		ENSSSCG00000021560	9.45787	0.635454	2.72724e-19	3.07361e-18		PCDHAC2	18.6546	1.50388	9.78667e-74	1.51631e-72		ENSSSCG00000017386	41.1841	0.625951	0	0		QSOX1	52.8556	1.04509	0	0		UBC	16.9772
ENSSSCG00000012382	33.1265	0.960629	1.50967e-223	3.10665e-222		SNORA72-1	72.1016	1.35318	0	0		FRAS1	57.6378	2.10514	0	0		USP22	16.2883	1.05934	2.00147e-55	3.36512e-54		ENSSSCG00000026064	9.44475	0.669748	3.03489e-19	3.40965e-18		ENSSSCG00000049482	18.6384	4.15318	1.60274e-73	2.47602e-72		CACNB2	41.1667	1.07363	0	0		PPY	52.8335	0.848763	0	0		FUT8	16.9695
ENSSSCG00000025403	32.9879	2.67917	2.06969e-220	4.21032e-219		HSD17B2	72.0017	1.81828	0	0		LAPTM4B	57.6173	0.7689	0	0		ENSSSCG00000038702	16.2024	0.923525	6.37938e-55	1.06385e-53		ENSSSCG00000050649	9.40145	1.18013	4.29642e-19	4.79863e-18		LRRC42	18.6106	0.807958	1.7e-73	2.62476e-72		ENSSSCG00000031349	41.153	0.796048	0	0		AKT3	52.7914	1.93743	0	0		TRPM3	16.9593
SBK1	32.9448	1.38016	9.59701e-221	1.95528e-219		ENSSSCG00000000563	71.8418	5.08172	0	0		ENSSSCG00000043966	57.5973	3.0086	0	0		QPRT	16.1779	1.41594	9.89542e-55	1.64301e-53		ENSSSCG00000000908	9.39399	0.602211	4.47832e-19	4.99551e-18		TBCA	18.5901	0.306147	1.58944e-73	2.4569e-72		ENSSSCG00000002907	41.1522	0.435151	0	0		PGRMC1	52.723	0.532276	0	0		FLRT1	16.9548
MDFI	32.9143	3.30113	2.59368e-219	5.25219e-218		IL4R	71.7774	2.32456	0	0		HK1	57.5233	2.7075	0	0		APOOL	16.173	0.932916	9.71415e-55	1.61392e-53		ENSSSCG00000007336	9.39141	1.33799	4.66727e-19	5.19758e-18		CYCS	18.5685	0.588291	3.09581e-73	4.76605e-72		PGM5	41.1364	2.34813	0	0		LRRC26	52.6911	1.54765	0	0		RFK	16.9467
CXCL14	32.9117	4.30417	4.74428e-219	9.58533e-218		COX6B2	71.4906	2.02367	0	0		ENSSSCG00000048543	57.489	1.12608	0	0		PSMA6	16.1227	0.61215	1.77137e-54	2.93018e-53		SCOC	9.38696	0.707141	4.72378e-19	5.25611e-18		CDH7	18.5242	5.33274	1.10855e-72	1.69879e-71		FAM20C	41.1322	1.13109	0	0		HMCN1	52.5979	6.17614	0	0		ENSSSCG00000013902	16.9244
RUVBL1	32.8969	0.992349	1.30371e-220	2.65414e-219		NR5A2	71.2177	1.33177	0	0		ENSSSCG00000033786	57.2867	1.70241	0	0		CSDE1	16.1153	0.536995	1.9135e-54	3.15902e-53		GPN3	9.37632	1.4539	5.28196e-19	5.8552e-18		ENSSSCG00000003965	18.5152	1.0274	9.09341e-73	1.39431e-71		PDE3B	41.1277	1.13333	0	0		RAB3C	52.5405	1.20326	0	0		TTC3	16.912
MRPL20	32.8803	0.637336	4.27109e-221	8.70851e-220		NAALADL2	70.6365	1.27466	0	0		UST	57.2238	4.4445	0	0		ENSSSCG00000026140	16.0979	1.12182	2.92516e-54	4.81784e-53		RRM1	9.3711	1.20983	5.46553e-19	6.05114e-18		DGKZ	18.4699	1.15926	2.02444e-72	3.09875e-71		SGCD	41.0374	3.22881	0	0		FEV	52.5165	1.58382	0	0		SEC62	16.871
SEC11A	32.7526	0.612613	1.54125e-219	3.13056e-218		MBNL1	70.536	1.14026	0	0		ENSSSCG00000012731	57.214	1.31676	0	0		ARHGAP1	16.0812	1.37091	3.76921e-54	6.20035e-53		WDR34	9.37074	1.00901	5.4575e-19	6.04476e-18		CHD7	18.4388	0.74768	2.93768e-72	4.48632e-71		DDC	40.9368	0.914442	0	0		DCLK1	52.5123	3.25478	0	0		C15orf61	16.8679
NUDT21	32.7322	0.658119	3.14911e-219	6.3721e-218		MT1A	70.5057	3.70384	0	0		EPCAM	57.1957	0.490941	0	0		SRSF10	16.0464	0.707835	5.3846e-54	8.83041e-53		ENSSSCG00000037071	9.35865	0.713819	5.96523e-19	6.57977e-18		ENSSSCG00000042146	18.4327	1.33754	3.8804e-72	5.91584e-71		NPC2	40.8995	0.940333	0	0		C15orf61	52.463	1.08034	0	0		DEPP1	16.8592
TOMM34	32.6974	1.6519	1.85907e-217	3.7306e-216		CDH4	70.5042	2.08041	0	0		WWP2	57.1864	2.03195	0	0		GNAI2	16.042	0.858131	5.99475e-54	9.80688e-53		TCF4	9.34741	0.780187	6.48094e-19	7.1368e-18		TRAF5	18.4029	1.56715	6.71432e-72	1.01954e-70		AKAP9	40.8398	0.622909	0	0		ATXN10	52.417	0.684271	0	0		OTOP3	16.8492
IGF2BP2	32.6681	0.694399	1.46708e-218	2.95288e-217		ENSSSCG00000016379	70.2322	1.29562	0	0		NDRG2	57.1859	1.10535	0	0		HIPK2	15.9792	0.759476	1.36672e-53	2.22763e-52		GNAO1	9.34254	1.02158	6.74727e-19	7.42088e-18		TAF3	18.3686	1.1002	1.07745e-71	1.63142e-70		APRT	40.7521	0.742255	0	0		CPD	52.3722	0.872616	0	0		RORA	16.7937
ENSSSCG00000031117	32.6516	1.185	2.52406e-217	5.06123e-216		ENSSSCG00000033806	70.1109	4.71663	0	0		HNF1B	57.091	1.56142	0	0		ZFAND6	15.9652	0.546129	1.49628e-53	2.43732e-52		DLC1	9.33922	1.8591	7.08328e-19	7.7744e-18		LRRN3	18.3452	1.50664	1.68914e-71	2.55326e-70		ENSSSCG00000034019	40.7448	0.373678	0	0		SEC62	52.3309	0.587372	0	0		CNTLN	16.7387
ELAVL1	32.644	0.750559	6.5042e-218	1.30717e-216		TMEM189	70.0943	1.43344	0	0		RHOJ	56.9325	4.4639	0	0		KIF21B	15.9042	2.14225	4.76999e-53	7.72269e-52		CDK5RAP2	9.32914	2.08365	7.68158e-19	8.40684e-18		VTI1B	18.3225	0.791509	2.10381e-71	3.17287e-70		ENSSSCG00000039612	40.7261	0.774973	0	0		ENSSSCG00000046598	52.2957	1.71961	0	0		U6-727	16.7297
CDCA4	32.5854	1.20818	1.8408e-216	3.67181e-215		ENSSSCG00000041577	70.0804	2.96668	0	0		FERMT1	56.8626	1.60551	0	0		MGAT5	15.9023	1.01317	4.32441e-53	7.00555e-52		FBXO5	9.32122	2.83882	8.20569e-19	8.95469e-18		SRGAP3	18.2962	1.60878	4.00764e-71	6.03729e-70		TMEM9	40.7257	0.908637	0	0		ENSSSCG00000034868	52.2938	0.727159	0	0		UROS	16.7181
MAGOHB	32.5105	1.02991	8.23627e-216	1.63431e-214		PPM1L	69.9471	2.15609	0	0		ssc-mir-30c-2	56.8489	3.8358	0	0		ULK1	15.8813	1.57417	6.23703e-53	1.00795e-51		MPDZ	9.32113	1.51069	8.09933e-19	8.84224e-18		FKBP1B	18.2884	1.08317	4.04209e-71	6.08574e-70		B2M	40.6959	0.843742	0	0		GALP	52.2256	1.14657	0	0		ENSSSCG00000043387	16.7049
QKI	32.508	0.888253	3.13134e-216	6.24137e-215		FAM13A	69.8245	2.0212	0	0		LRCH1	56.7267	2.89104	0	0		POMT2	15.8536	1.26515	8.71003e-53	1.4059e-51		CDC6	9.31192	3.71931	8.84688e-19	9.63074e-18		NUDT16	18.279	0.799952	4.25358e-71	6.40055e-70		PSENEN	40.6161	0.693525	0	0		ITGA4	52.2252	2.50956	0	0		PFDN2	16.6977
MRPL12	32.4998	0.549865	3.21389e-217	6.43963e-216		SLC2A5	69.8169	4.65635	0	0		ENSSSCG00000006395	56.671	1.067	0	0		CCT8	15.8435	0.607368	8.76095e-53	1.41326e-51		SCLY	9.30497	1.10418	9.09324e-19	9.88682e-18		MAML2	18.2605	0.489015	4.60954e-71	6.92835e-70		COG1	40.5709	1.10026	0	0		NPTN	52.1027	0.833411	0	0		SELENOK	16.6646
ZCCHC17	32.4718	0.806926	1.11079e-215	2.19921e-214		SNORD54	69.6269	1.53437	0	0		METTL7A	56.5866	1.78831	0	0		SLC38A5	15.8095	0.820783	1.46567e-52	2.35151e-51		WDR76	9.29838	2.25838	9.7507e-19	1.05844e-17		DYNLT3	18.2588	0.903972	6.35783e-71	9.54534e-70		ENSSSCG00000051580	40.3758	2.77737	0	0		ENSSSCG00000051508	52.0317	3.45367	0	0		ENSSSCG00000041677	16.6408
ENSSSCG00000006581	32.4693	1.02531	1.27823e-215	2.52697e-214		ACBD6	69.6232	1.16812	0	0		ADAMTS15	56.3693	4.11366	0	0		RGS16	15.7955	1.89201	2.09594e-52	3.35665e-51		DNA2	9.29643	2.769	9.93097e-19	1.07757e-17		EXTL1	18.2513	1.18505	7.61191e-71	1.13961e-69		OXTR	40.3076	7.3701	0	0		MT3	51.9538	0.776081	0	0		BEX4	16.6347
ATP5MC3	32.427	0.503649	9.30648e-216	1.8453e-214		AMOTL1	69.5925	2.04975	0	0		TPM1	56.1568	0.78182	0	0		DNAJC12	15.7789	1.02526	2.32331e-52	3.71632e-51		ENSSSCG00000012997	9.28749	2.00731	1.05884e-18	1.14703e-17		HIST1H2BD	18.224	0.883173	1.10242e-70	1.64677e-69		MGAT5	40.263	1.12364	0	0		CPB2	51.8955	1.93211	0	0		HYPK	16.624
CBX1	32.348	1.04078	8.16015e-214	1.60015e-212		EIF4EBP2	69.5117	1.31826	0	0		S100A6	56.1446	2.90156	0	0		TM4SF4	15.7663	0.959189	2.80002e-52	4.46812e-51		DTL	9.28719	3.51779	1.07036e-18	1.15857e-17		ENSSSCG00000008012	18.1833	0.690265	1.95122e-70	2.9033e-69		C1QTNF6	40.2178	1.79342	0	0		CXADR	51.8032	0.661094	0	0		BACE1	16.6046
GUK1	32.346	0.681571	2.104e-214	4.13491e-213		DERL3	69.4272	3.27213	0	0		MCL1	56.1331	1.13841	0	0		DDIT4	15.7632	1.2424	3.08054e-52	4.91282e-51		HSPA13	9.25971	0.995801	1.28548e-18	1.38579e-17		RAB1B	18.1716	0.68305	2.39115e-70	3.55393e-69		SNX3	40.2089	0.703585	0	0		PKDCC	51.723	1.57296	0	0		ETV5	16.5942
MACROH2A1	32.3391	0.701103	2.92965e-214	5.75329e-213		ENSSSCG00000035374	69.3033	1.65349	0	0		PPFIBP1	56.0924	1.33418	0	0		TNNI1	15.7524	2.40512	3.94476e-52	6.26856e-51		BEX4	9.24967	0.504526	1.36786e-18	1.47282e-17		ASTN2	18.1593	4.07459	4.59079e-70	6.81939e-69		TPI1	40.1821	0.677341	0	0		SELENOT	51.7109	0.687058	0	0		ATP6AP2	16.5889
SSRP1	32.2896	0.779957	9.64653e-214	1.88883e-212		ENSSSCG00000043457	69.273	1.31575	0	0		ENHO	56.0811	1.4699	0	0		ENY2	15.7486	0.593474	3.23878e-52	5.15902e-51		CNTLN	9.23293	1.42849	1.59871e-18	1.71582e-17		CHST9	18.1175	0.936872	6.39933e-70	9.49002e-69		TF	40.152	2.84729	0	0		RAC3	51.704	0.81312	0	0		ADCY1	16.5706
GAPDH	32.278	0.416066	9.75198e-215	1.91794e-213		HACD4	69.1211	2.39579	0	0		CNIH4	55.9638	1.06488	0	0		ADCY1	15.7215	1.33765	5.41424e-52	8.58834e-51		MCM10	9.21896	2.48569	1.79872e-18	1.92584e-17		TIMM8B	18.0929	0.424658	7.6621e-70	1.13564e-68		SESN2	40.1452	2.10579	0	0		ENSSSCG00000050544	51.6734	2.2814	0	0		SMARCA1	16.5699
AMBP	32.2491	0.715007	4.58294e-215	9.03334e-214		ENSSSCG00000046111	69.0277	1.80597	0	0		PHYH	55.9567	1.41882	0	0		ENSSSCG00000045465	15.7106	1.68733	6.58146e-52	1.04089e-50		CKAP2L	9.1954	3.71693	2.16728e-18	2.31394e-17		LAMTOR5	18.0346	0.645618	2.29393e-69	3.37368e-68		HMGB3	39.9941	0.940801	0	0		NDUFA1	51.5814	0.596231	0	0		AEN	16.5675
ENSSSCG00000004054	32.2102	2.974	6.59685e-211	1.28415e-209		CTRC	68.9386	2.3097	0	0		A2M	55.8972	5.02871	0	0		ENSSSCG00000026488	15.7075	0.711021	5.8521e-52	9.27185e-51		DYNC1LI1	9.18137	1.34729	2.3696e-18	2.52489e-17		C15orf61	18.0222	0.82955	3.0344e-69	4.45775e-68		LAMP1	39.9475	0.64841	0	0		ENSSSCG00000041506	51.5159	1.92166	0	0		ZC2HC1A	16.5656
ENSSSCG00000014910	32.1497	1.80083	9.18714e-211	1.78576e-209		MARCKS	68.8531	0.676001	0	0		FAM160A1	55.8949	2.34622	0	0		TSKU	15.7059	2.17783	7.29456e-52	1.1523e-50		HBQ1	9.1794	1.35833	2.41187e-18	2.56788e-17		ITGBL1	18.0213	2.91607	4.22061e-69	6.17995e-68		ANXA4	39.8942	0.720044	0	0		PFKP	51.2953	1.24691	0	0		TDP2	16.5642
ENSSSCG00000009851	32.1477	0.378212	1.05434e-212	2.05539e-211		VARS1	68.7555	1.88515	0	0		CBX3	55.8699	0.78234	0	0		ETS1	15.7059	1.6994	7.08172e-52	1.11934e-50		PARP1	9.17832	0.900617	2.40647e-18	2.56315e-17		HDDC2	18.0161	1.06033	3.61782e-69	5.309e-68		CLTB	39.8502	0.677196	0	0		GNAI2	51.2726	0.929181	0	0		NAGS	16.5591
ENSSSCG00000044572	32.0059	0.756046	1.61081e-210	3.12647e-209		EVA1B	68.6791	2.88815	0	0		NFIX	55.8626	2.4319	0	0		WFIKKN2	15.6966	3.6199	8.77783e-52	1.38169e-50		MYL12A	9.17424	0.529965	2.45221e-18	2.60978e-17		LLGL2	17.986	0.860628	5.56903e-69	8.14093e-68		ENSSSCG00000016990	39.7447	0.549366	0	0		ATP6V1E1	51.2356	0.713305	0	0		KCNJ6	16.557
PSMA7	31.961	0.486271	5.68468e-210	1.10175e-208		IFRD2	68.3686	1.78131	0	0		MLLT3	55.7732	1.20039	0	0		MLXIPL	15.6875	0.892878	7.75371e-52	1.22265e-50		NUDT14	9.16932	0.843068	2.56972e-18	2.7283e-17		ENSSSCG00000033566	17.9399	0.984688	1.22364e-68	1.78581e-67		CD99L2	39.5573	1.31365	0	0		SUSD4	51.1786	2.97235	0	0		CXXC4	16.5564
PPP1CC	31.947	0.685573	1.77375e-209	3.42775e-208		ENSSSCG00000028322	68.3278	1.04908	0	0		CYB5A	55.6335	0.59175	0	0		BTG1	15.687	0.419523	6.12923e-52	9.70515e-51		CIP2A	9.16641	2.02357	2.68003e-18	2.84202e-17		CAPSL	17.8933	0.941256	2.56297e-68	3.73024e-67		ELP4	39.4816	0.87595	0	0		ENSSSCG00000050854	51.1238	1.7161	0	0		CDK5R2	16.5007
EIF2A	31.932	0.831331	3.46228e-209	6.68597e-208		ALDH18A1	68.2325	1.47332	0	0		GRHPR	55.5958	0.832889	0	0		MAP3K14	15.6621	1.75136	1.2976e-51	2.03249e-50		RFC4	9.13783	1.41733	3.31269e-18	3.49209e-17		GALNT13	17.8451	1.85573	6.84211e-68	9.89877e-67		ANKH	39.4407	1.77137	0	0		PGBD5	51.1137	2.07459	0	0		FAM174A	16.4398
ENSSSCG00000022401	31.855	0.971481	7.16676e-208	1.37797e-206		IQSEC1	68.1824	2.61727	0	0		ENSSSCG00000039089	55.3916	1.36518	0	0		DUSP6	15.6619	1.73631	1.2981e-51	2.03249e-50		NUTF2	9.13602	0.60982	3.27635e-18	3.45651e-17		VAMP5	17.8415	1.26735	6.5742e-68	9.51635e-67		ELAVL4	39.3392	1.33698	0	0		NKX2-2	51.0382	0.872473	0	0		ENSSSCG00000002972	16.4384
DBN1	31.8268	1.03273	1.1898e-207	2.28272e-206		UBB	68.1335	0.355279	0	0		GALK1	55.3831	1.56324	0	0		YWHAB	15.6547	0.506716	1.12557e-51	1.76651e-50		ENSSSCG00000037043	9.12458	1.92481	3.69132e-18	3.88507e-17		PIN1	17.8341	0.551017	5.7577e-68	8.3435e-67		FMC1	39.3341	0.841826	0	0		LRP12	50.9803	1.55051	0	0		U6-382	16.4247
NOTCH1	31.7806	1.49679	1.53829e-206	2.94496e-205		ENSSSCG00000022032	68.0434	1.82986	0	0		POSTN	55.3777	3.36192	0	0		ENSSSCG00000014949	15.6545	1.04469	1.31156e-51	2.05237e-50		NT5DC2	9.10548	0.954032	4.19339e-18	4.39787e-17		FAM204A	17.8219	0.584804	7.22894e-68	1.04471e-66		TRAPPC4	39.3308	0.936159	0	0		PLD1	50.9483	1.66109	0	0		MEF2A	16.4063
ENSSSCG00000035760	31.7312	2.4233	2.13736e-205	4.08306e-204		DNAJC3	67.8646	1.66665	0	0		IGSF3	55.2777	3.08065	0	0		ENSSSCG00000008686	15.6261	0.726722	1.62514e-51	2.54007e-50		CIT	9.10311	2.02377	4.34643e-18	4.54762e-17		RGS7	17.8094	1.06211	1.05337e-67	1.51572e-66		IFT22	39.3308	1.16148	0	0		DPCD	50.8748	0.8273	0	0		ATP6V0D1	16.3673
PIP4K2A	31.6866	1.24669	9.94103e-206	1.90178e-204		TEAD2	67.5418	1.50706	0	0		DCLK3	55.2748	4.99919	0	0		ZC3H8	15.6206	1.0941	2.09922e-51	3.27338e-50		HNRNPR	9.10147	0.570489	4.26333e-18	4.4677e-17		BCAS4	17.8022	0.872649	1.1195e-67	1.60828e-66		UBE2D3	39.316	0.513998	0	0		SERP2	50.779	1.69724	0	0		CDH17	16.3513
ENSSSCG00000000377	31.6504	0.791995	1.14421e-205	2.18737e-204		SELENOP	67.4688	0.829098	0	0		TMSB10	55.2193	0.442178	0	0		TPR	15.62	0.780115	1.9906e-51	3.10582e-50		ELOVL1	9.09449	1.52412	4.61786e-18	4.82783e-17		DYNLT1	17.7837	0.528347	1.29556e-67	1.85921e-66		ENSSSCG00000008748	39.2494	0.663333	0	0		RIMS2	50.7297	1.36206	0	0		LRRN3	16.3378
ENSSSCG00000011676	31.6138	1.01984	5.56186e-205	1.06097e-203		TARS3	67.4259	1.71335	0	0		ARHGAP21	55.2041	1.54887	0	0		SMARCD1	15.565	1.26356	4.61612e-51	7.14788e-50		SLC39A6	9.08687	1.64008	4.90328e-18	5.11619e-17		SPTBN4	17.738	1.83335	3.83074e-67	5.47375e-66		ENSSSCG00000012527	39.2294	1.15929	0	0		YWHAQ	50.7233	0.448499	0	0		GSTZ1	16.3288
AKAP12	31.5549	4.03094	7.71485e-203	1.46018e-201		ENSSSCG00000034709	67.3047	0.877644	0	0		HEXB	55.1023	2.421	0	0		PCDH19	15.5577	2.76503	5.68038e-51	8.77544e-50		VBP1	9.07701	0.785501	5.1745e-18	5.39074e-17		ENSSSCG00000019624	17.7145	2.48505	6.01661e-67	8.57874e-66		YPEL3	39.1195	0.895593	0	0		AKIRIN1	50.3853	0.92401	0	0		AKAP9	16.2853
HNRNPH3	31.5479	0.582308	7.69563e-205	1.46591e-203		PABPC4	67.2582	1.84592	0	0		TINAGL1	55.0193	3.02833	0	0		FBLIM1	15.5362	1.52539	7.03171e-51	1.08442e-49		IFT27	9.06767	0.989257	5.61442e-18	5.83992e-17		EIF1B	17.6046	0.400064	1.91882e-66	2.72718e-65		LMNA	39.1036	0.934656	0	2.62085e-308		GRN	50.3523	0.694637	0	0		RAB18	16.2751
SYNCRIP	31.5436	0.802071	1.83061e-204	3.48208e-203		ENSSSCG00000008659	67.0308	0.752719	0	0		ENSSSCG00000033952	54.9688	2.41236	0	0		GNB2	15.4922	0.454577	1.02034e-50	1.57264e-49		MACROH2A2	9.06518	0.879108	5.68805e-18	5.91189e-17		RNF19A	17.5109	0.855784	1.22278e-65	1.72412e-64		RFK	39.0772	1.36319	8.37116e-308	1.84824e-306		ENSSSCG00000008012	50.2855	0.874855	0	0		COX7A2L	16.2696
WBP1	31.541	0.870891	3.31449e-204	6.29564e-203		ENSSSCG00000024162	66.9744	1.52712	0	0		KANSL1L	54.9498	2.25377	0	0		LIMA1	15.487	1.40164	1.37312e-50	2.11395e-49		LBR	9.06028	2.10601	6.03553e-18	6.26571e-17		GIPR	17.4831	1.56	2.22279e-65	3.12422e-64		TOLLIP	39.0695	0.980115	0	1.56682e-307		APOBEC2	50.2691	0.734598	0	0		RAC3	16.2303
CDK4	31.5313	0.738806	3.16996e-204	6.02541e-203		ENSSSCG00000046579	66.8741	1.94008	0	0		DHRS3	54.9055	3.5932	0	0		LZTS1	15.4227	1.92325	3.38986e-50	5.20071e-49		FN1	9.05518	1.95218	6.2733e-18	6.50748e-17		NAT14	17.4778	1.10159	2.23313e-65	3.13544e-64		CTSF	39.0688	0.971572	0	1.50024e-307		C3orf14	50.122	1.8415	0	0		SH3GL2	16.2132
CCDC198	31.5267	1.16965	9.47257e-204	1.79669e-202		RPL10A	66.3975	1.20296	0	0		PHACTR2	54.8265	2.68102	0	0		SEMA6A	15.4102	1.66068	3.95972e-50	6.068e-49		CISD2	9.04657	0.763544	6.5508e-18	6.79006e-17		C9orf116	17.4735	1.63026	2.63691e-65	3.69847e-64		KCNH6	39.0028	2.00347	8.83619e-306	1.93489e-304		PPP2R2B	50.1135	1.92673	0	0		PSIP1	16.1767
TFDP2	31.4938	1.06766	1.62554e-203	3.08101e-202		SLC38A3	66.1686	2.97844	0	0		SMIM1	54.7508	1.71217	0	0		HNRNPH1	15.3608	0.423592	6.11e-50	9.34704e-49		ENSSSCG00000039370	9.04181	4.02813	6.99616e-18	7.24041e-17		GOLGA7B	17.4607	1.4722	3.15386e-65	4.41193e-64		SNRNP25	39.0026	0.588054	0	2.54602e-308		GCK	50.1001	1.50964	0	0		SASH1	16.0957
ZMIZ1	31.489	1.04647	2.59412e-203	4.91333e-202		RAN	65.7129	0.555609	0	0		TRPC4	54.6879	2.70554	0	0		ANXA11	15.3543	0.915781	7.52739e-50	1.14758e-48		CEP72	9.03615	2.70729	7.2672e-18	7.50926e-17		AAMP	17.4417	0.605265	3.3199e-65	4.63933e-64		TMED8	38.9235	1.32271	6.81474e-306	1.49347e-304		TRPC5	50.0956	1.69864	0	0		SLC35F3	16.0797
CSDE1	31.4769	0.543468	3.55595e-204	6.74946e-203		ENSSSCG00000049790	65.394	5.20126	0	0		ENSSSCG00000042520	54.6297	3.60739	0	0		ENSSSCG00000003909	15.3432	2.3186	1.01468e-49	1.54251e-48		ENSSSCG00000034230	9.03283	0.477836	7.13393e-18	7.37726e-17		MTSS1	17.4411	0.913419	3.73501e-65	5.21394e-64		ENSSSCG00000003225	38.8687	2.16177	1.16754e-303	2.53989e-302		SNTG1	50.0359	2.91455	0	0		APBB1	16.0723
ZNF521	31.4446	2.84198	9.34546e-202	1.76005e-200		RASSF6	65.2731	2.26846	0	0		MYL12A	54.5763	0.587943	0	0		RAB2A	15.3135	0.490617	1.14484e-49	1.7374e-48		MAPRE1	9.00894	1.09731	8.76673e-18	9.02025e-17		LAMTOR1	17.4242	0.644866	4.61076e-65	6.43309e-64		GET3	38.8671	0.892894	3.24201e-306	7.11082e-305		SELENOK	50.0217	0.615771	0	0		FAM171B	16.0249
IGDCC4	31.3816	1.77657	1.49373e-201	2.81118e-200		ACTG1	65.1388	0.440437	0	0		LYL1	54.502	2.22934	0	0		ENSSSCG00000047615	15.3099	3.97044	1.66956e-49	2.52652e-48		POLD1	8.99866	1.97258	9.59613e-18	9.84702e-17		LENG9	17.4098	1.63329	7.25333e-65	1.00937e-63		CMPK1	38.8648	0.670251	5.86125e-307	1.28663e-305		FAM155A	50.0152	2.42676	0	0		FKBP1B	16.0222
CCDC142	31.372	0.679503	1.31342e-202	2.4806e-201		ZKSCAN2	65.0078	2.47877	0	0		U1	54.4382	2.95341	0	0		H2AZ2	15.289	0.400859	1.48155e-49	2.24329e-48		NIN	8.99059	1.29261	1.00808e-17	1.03285e-16		ENSSSCG00000003079	17.38	1.96406	1.21228e-64	1.68436e-63		SLC35G2	38.8392	1.88062	1.47153e-303	3.1986e-302		SSBP4	49.982	0.998408	0	0		LRRC24	16.0017
CYB5A	31.3206	0.469217	9.67558e-203	1.82868e-201		HIGD2A	64.8118	0.654128	0	0		NEDD4L	54.3793	1.07458	0	0		AHSA1	15.26	0.682753	2.53943e-49	3.82768e-48		ENSSSCG00000040535	8.98731	1.50465	1.04084e-17	1.06518e-16		ENSSSCG00000047186	17.364	2.61137	1.63615e-64	2.26738e-63		ENSSSCG00000004583	38.7565	0.670531	1.37514e-305	3.00624e-304		CNPY3	49.9469	1.01405	0	0		FGF12	15.9881
FAM136A	31.2052	0.983016	4.08489e-200	7.65528e-199		TAL2	64.792	4.30584	0	0		MYL9	54.3414	3.9392	0	0		ENSSSCG00000049384	15.2309	0.832656	3.91022e-49	5.88388e-48		ENSSSCG00000045321	8.9815	4.5073	1.1053e-17	1.13072e-16		ENSSSCG00000038713	17.3581	0.874271	1.39713e-64	1.93917e-63		GHITM	38.7106	0.756052	2.15069e-304	4.68632e-303		DNAJB1	49.6249	0.843179	0	0		FAM83B	15.9703
GPX8	31.1381	2.22764	2.10327e-198	3.92233e-197		ENSSSCG00000022128	64.6351	1.52295	0	0		KIAA1217	54.2398	0.965651	0	0		TP53INP1	15.2183	2.04069	5.29218e-49	7.95438e-48		WDR54	8.97893	1.50387	1.10897e-17	1.13403e-16		ARFGEF1	17.3521	0.675825	1.46752e-64	2.03582e-63		C1orf210	38.697	0.979604	1.61761e-303	3.51326e-302		GGH	49.6223	0.728264	0	0		GPM6A	15.9674
YWHAQ	31.0975	0.420821	5.6015e-200	1.04901e-198		TSTA3	64.51	1.23548	0	0		NR6A1	54.1391	1.80694	0	0		NEURL1	15.1921	0.890841	6.67821e-49	1.0032e-47		ENSSSCG00000049380	8.94816	1.90838	1.40702e-17	1.43441e-16		PFDN2	17.3471	0.522603	1.5034e-64	2.0845e-63		U6-362	38.6535	3.16057	1.12003e-299	2.40512e-298		SCIN	49.5841	2.88478	0	0		RAB1B	15.9248
DDAH2	31.0875	0.963864	1.06402e-198	1.98703e-197		MTARC2	64.3149	1.61725	0	0		ZBTB20	54.1296	0.589244	0	0		HECTD4	15.1863	1.18502	7.53698e-49	1.13093e-47		ZBTB45	8.94028	2.04959	1.49655e-17	1.52336e-16		LYSMD2	17.314	1.34096	3.17857e-64	4.39345e-63		GAL3ST1	38.6354	1.55654	4.47585e-301	9.65023e-300		AP2A2	49.5672	0.938872	0	0		TPPP3	15.9024
IDH2	31.0654	0.556488	3.57482e-199	6.68529e-198		NME1	64.3057	0.925885	0	0		NCMAP	54.0502	2.13828	0	0		SNAPC3	15.1836	1.90811	8.37592e-49	1.25611e-47		ENSSSCG00000000769	8.93806	1.26169	1.50674e-17	1.53315e-16		PCDH19	17.2832	2.38198	5.80729e-64	8.01027e-63		PSMC4	38.599	0.928848	3.56731e-302	7.72887e-301		STAT1	49.5328	0.875906	0	0		LMNA	15.8918
ENSSSCG00000028322	30.9852	0.632614	9.54018e-199	1.78286e-197		HM13	64.2389	1.23045	0	0		ABHD17C	53.9869	2.07792	0	0		SERPING1	15.1394	1.11209	1.39319e-48	2.07995e-47		MYBL2	8.93313	2.48495	1.57861e-17	1.60383e-16		RPF2	17.2709	0.972994	5.92957e-64	8.1747e-63		MED25	38.538	0.96347	3.02673e-301	6.53112e-300		LRP11	49.4999	1.42326	0	0		ENSSSCG00000036943	15.883
AZIN1	30.9715	0.715663	9.02078e-198	1.67991e-196		MYO5C	64.2206	2.22371	0	0		ENSSSCG00000032003	53.9632	0.575112	0	0		GADD45A	15.1321	1.14781	1.65814e-48	2.46998e-47		VPS29	8.92744	0.670082	1.60985e-17	1.63432e-16		ETNK1	17.2683	1.07876	6.28734e-64	8.66347e-63		NDUFB8	38.5284	0.511199	4.73588e-303	1.02774e-301		DNAJC12	49.4165	1.14882	0	0		CEP126	15.8735
BAG1	30.8513	0.851897	2.77237e-196	5.14491e-195		SSR1	63.9298	0.956432	0	0		HIP1	53.6888	2.19828	0	0		TP53	15.1254	1.02327	1.67377e-48	2.49047e-47		HIF1A	8.92086	1.04489	1.69997e-17	1.72187e-16		PRPS2	17.2654	0.542852	5.00942e-64	6.91689e-63		PSMC5	38.5066	0.682169	7.64966e-302	1.65467e-300		MOSPD3	49.3869	1.0124	0	0		MEAF6	15.8697
RFC4	30.7681	1.32946	1.34472e-194	2.48512e-193		ENSSSCG00000018096	63.6947	1.74535	0	0		DUSP1	53.6665	0.991891	0	0		SRSF6	15.1178	0.589002	1.67192e-48	2.48911e-47		ENSSSCG00000011676	8.91905	0.97524	1.72055e-17	1.74205e-16		ENSSSCG00000045098	17.2393	1.00212	9.73967e-64	1.33928e-62		CAPZB	38.4883	0.728024	1.93826e-301	4.1858e-300		MAPK8IP2	49.3493	1.78789	0	0		UBE2B	15.83
ENSSSCG00000039582	30.7633	0.475535	1.18044e-195	2.18455e-194		FAAH	63.6773	1.87313	0	0		ST3GAL5	53.591	1.71207	0	0		PSMA5	15.1115	0.754584	1.91771e-48	2.85185e-47		AHSG	8.89331	4.27595	2.14303e-17	2.16324e-16		DBI	17.1831	0.379639	1.74296e-63	2.39054e-62		MFGE8	38.4191	1.63807	5.7103e-298	1.2213e-296		SDHB	49.314	0.577336	0	0		VPS9D1	15.7848
CFL1	30.7475	0.37311	2.36933e-196	4.40001e-195		SQOR	63.6623	4.06846	0	0		EIF2AK3	53.5824	1.59981	0	0		RTF1	15.1061	0.736533	2.04857e-48	3.04136e-47		ENSSSCG00000050582	8.87972	1.33258	2.33811e-17	2.35659e-16		ENSSSCG00000010104	17.1331	0.521542	4.53145e-63	6.20548e-62		PAPSS2	38.3472	1.69847	6.99245e-297	1.49193e-295		KIF5C	49.3059	2.29372	0	0		CLDND1	15.7735
ZNF395	30.7196	0.740375	7.78494e-195	1.4397e-193		H1-3	63.6227	1.21496	0	0		PDLIM1	53.5498	1.51018	0	0		SRP14	15.1012	0.664005	2.13763e-48	3.17181e-47		SNRPA1	8.8696	0.959738	2.4988e-17	2.5119e-16		SESN1	17.0155	0.714477	3.03198e-62	4.11401e-61		RPS6KA3	38.2713	1.19984	1.11665e-296	2.3787e-295		NR4A2	49.3019	0.817741	0	0		ARF4	15.7176
SPC24	30.633	1.73034	8.46437e-193	1.55242e-191		CHRDL1	63.6219	3.97645	0	0		SPTAN1	53.4378	1.1455	0	0		ZC2HC1A	15.0891	1.0176	2.6961e-48	3.9938e-47		FAM3C	8.86857	0.865842	2.51101e-17	2.52322e-16		B4GALNT3	17.0094	1.89287	4.1416e-62	5.61106e-61		MARCHF4	38.2489	2.42028	1.62606e-294	3.45008e-293		MAPT	49.2781	0.883233	0	0		DEGS2	15.6932
ARMH4	30.5904	2.21187	5.54609e-192	1.01162e-190		GAS2	63.5898	1.2177	0	0		ENSSSCG00000004150	53.2543	1.13609	0	0		TRIM59	15.0855	1.35733	2.9698e-48	4.39435e-47		C1orf194	8.86666	1.19528	2.56763e-17	2.57526e-16		ENSSSCG00000017446	16.9843	1.33884	5.71544e-62	7.71975e-61		TMA7	38.0895	0.361623	6.64058e-297	1.41799e-295		STON2	49.2725	2.25494	0	0		TMEM9B	15.6698
GTF3C6	30.5812	1.04448	1.28489e-192	2.35011e-191		FAM169A	63.1084	1.71577	0	0		GALNT1	53.2176	0.966566	0	0		STK3	15.0736	1.53793	3.54298e-48	5.23084e-47		PRDX3	8.8663	0.595965	2.53743e-17	2.54689e-16		PRDX2	16.9789	0.272952	4.0208e-62	5.45017e-61		RNF7	38.0261	0.672183	5.3466e-295	1.13622e-293		AIG1	49.2039	0.987123	0	0		BCAS4	15.6534
TPM3	30.5693	0.5892	3.86408e-193	7.10656e-192		GAST	62.9367	2.45557	0	0		KMT2E	53.1638	0.806092	0	0		FHOD3	15.0575	2.08773	4.58585e-48	6.76305e-47		ENSSSCG00000013318	8.86384	0.999425	2.60441e-17	2.60921e-16		ENSSSCG00000049570	16.9753	2.14526	7.1868e-62	9.68255e-61		ENSSSCG00000013754	37.9956	1.08232	1.05616e-293	2.23556e-292		ENSSSCG00000039009	49.0748	2.28056	0	0		ENSSSCG00000015084	15.6359
TK1	30.5495	1.82661	8.872e-192	1.61386e-190		C1orf53	62.6809	1.51009	0	0		JCAD	53.0842	1.99902	0	0		ENSSSCG00000044106	15.0531	1.32835	4.53909e-48	6.6978e-47		GALNT13	8.86162	2.03471	2.694e-17	2.69693e-16		MYO1E	16.9532	0.771551	8.20566e-62	1.10441e-60		ARV1	37.9888	1.33052	2.34321e-292	4.94021e-291		ENSSSCG00000050629	49.0444	3.37245	0	0		NOP10	15.6334
SLC51A	30.5392	2.96943	3.44112e-191	6.24251e-190		ID2	62.5836	1.16446	0	0		AKIRIN2	53.0663	1.04979	0	0		SLC34A3	15.0481	1.15484	4.71313e-48	6.94307e-47		MYBL1	8.85495	3.34608	2.85195e-17	2.85398e-16		PCBP4	16.918	0.887017	1.46249e-61	1.96243e-60		PCLO	37.9742	1.54576	8.11164e-292	1.70748e-290		PHACTR1	49.0216	2.08315	0	0		AHI1	15.6272
MCM3	30.5365	1.76944	1.37979e-191	2.50819e-190		THAP12	62.5541	1.85928	0	0		MAP3K21	53.0235	2.03308	0	0		MRAP2	15.035	2.65703	6.29627e-48	9.23441e-47		RAB2A	8.84452	0.512629	2.96028e-17	2.95906e-16		SLC24A2	16.9041	1.88562	2.11842e-61	2.8383e-60		BLOC1S1	37.9495	0.588455	3.60383e-294	7.6403e-293		CD81	48.8986	0.683205	0	0		TANC2	15.5463
NANS	30.4647	0.40842	7.98186e-193	1.46493e-191		ARRDC4	62.3114	1.69519	0	0		STK38L	52.9742	1.51272	0	0		CLIC4	15.0309	1.23345	6.03479e-48	8.85578e-47		AP3S1	8.80592	0.854936	4.01517e-17	3.98511e-16		MIER1	16.8993	0.697643	1.86277e-61	2.49828e-60		PSMD8	37.9236	0.663798	1.41571e-293	2.99423e-292		ENSSSCG00000009672	48.8637	3.29226	0	0		ENSSSCG00000033987	15.5342
FOXN3	30.4625	0.934385	1.90517e-191	3.45852e-190		THYN1	62.3104	0.889724	0	0		ACTN4	52.8333	0.886752	0	0		RBM8A	15.0217	0.543614	5.92229e-48	8.69549e-47		SMS	8.80552	0.609474	3.97732e-17	3.95196e-16		AHI1	16.867	0.998091	3.34662e-61	4.47711e-60		SCLY	37.9217	1.14414	5.25337e-292	1.1067e-290		CAPZB	48.8063	0.70633	0	0		RAP1B	15.5195
ENSSSCG00000041512	30.3935	2.74886	1.52818e-189	2.75166e-188		PBX1	62.0987	0.814967	0	0		SPINT1	52.7414	1.35002	0	0		PRPS2	14.9891	0.813193	1.03296e-47	1.51e-46		TPR	8.80278	0.81036	4.1082e-17	4.07592e-16		ENSSSCG00000029043	16.8622	3.00394	4.38745e-61	5.85777e-60		USF2	37.8614	1.02456	2.87561e-291	6.03877e-290		SPATA17	48.7278	1.97549	0	0		ENSSSCG00000003079	15.4831
RCC2	30.3817	1.19213	2.9751e-190	5.37879e-189		SNORA70-31	61.9409	2.02581	0	0		FSTL1	52.7182	2.79516	0	0		ENSSSCG00000000394	14.9707	0.464582	1.1516e-47	1.68159e-46		DDAH1	8.77772	1.73466	5.03031e-17	4.97597e-16		MED25	16.8604	0.727226	3.4582e-61	4.62406e-60		LAMTOR2	37.6617	0.649279	1.12834e-289	2.35652e-288		BAD	48.7262	1.00428	0	0		PCLO	15.4687
APOOL	30.3529	0.914773	4.32723e-190	7.81277e-189		SOCS1	61.8734	3.17472	0	0		RBPMS	52.703	1.34826	0	0		PSMB1	14.9577	0.453149	1.36827e-47	1.9936e-46		ENSSSCG00000010203	8.77453	0.504747	5.0219e-17	4.9695e-16		WIF1	16.858	3.39612	4.74914e-61	6.3375e-60		ENSSSCG00000035992	37.597	0.85009	2.56284e-288	5.33154e-287		HLF	48.692	2.27745	0	0		TMEM134	15.4277
ENSSSCG00000008767	30.3116	2.27069	9.03277e-189	1.62097e-187		ENSSSCG00000006581	61.6945	1.36811	0	0		LRIG1	52.6093	1.81238	0	0		RBPJ	14.9391	0.773146	1.88475e-47	2.74014e-46		PCYT1A	8.76967	0.654412	5.20565e-17	5.14178e-16		ARMH1	16.8394	1.68871	5.71376e-61	7.6133e-60		LPAR1	37.5876	2.9638	6.86749e-285	1.4165e-283		GRB2	48.581	0.808883	0	0		WDR54	15.4214
SNRPF	30.3072	0.550217	3.77621e-190	6.82253e-189		TMEM141	61.6303	0.861862	0	0		PATZ1	52.4221	1.2365	0	0		PUSL1	14.9154	1.91954	2.95192e-47	4.27763e-46		CEP78	8.75322	1.98206	6.0446e-17	5.9594e-16		NPTX2	16.8097	0.904074	7.72721e-61	1.02704e-59		CELF3	37.5713	1.26727	7.36354e-287	1.52709e-285		DZANK1	48.5597	1.45684	0	0		SLC34A3	15.3798
HMGB3	30.3003	0.771334	6.84436e-190	1.2349e-188		CENPV	61.4933	1.46831	0	0		ADAMTSL4	52.0939	1.89653	0	0		GRK5	14.8787	2.09009	4.86461e-47	7.03021e-46		NAV2	8.74771	1.52382	6.27283e-17	6.17755e-16		SKP1	16.7988	0.324346	7.10744e-61	9.46085e-60		CERKL	37.4771	1.38608	3.24581e-285	6.70005e-284		TMEM179	48.2517	1.64511	0	0		ENSSSCG00000008555	15.3671
ENSSSCG00000040857	30.2661	0.55233	1.39335e-189	2.51057e-188		CAMK1D	61.4576	2.06801	0	0		ZNF219	52.0671	1.71366	0	0		GARS1	14.8735	1.14736	4.81924e-47	6.96842e-46		DNAJB1	8.74518	0.877449	6.32531e-17	6.22694e-16		ENSSSCG00000044563	16.7868	1.82227	1.29829e-60	1.7213e-59		MAP1LC3A	37.3753	0.728708	4.9681e-286	1.02871e-284		PAXX	48.214	0.504674	0	0		MFSD14A	15.3664
SIGMAR1	30.2398	0.866691	5.7212e-189	1.02877e-187		CYP2J34	61.4139	1.28509	0	0		MCC	51.9404	1.44271	0	0		PDAP1	14.8634	0.73509	5.13885e-47	7.4225e-46		KIF14	8.73664	3.86935	6.89318e-17	6.77346e-16		ENSSSCG00000008137	16.7564	0.787497	1.78107e-60	2.35903e-59		SEZ6L2	37.3542	1.38462	1.74592e-283	3.5735e-282		FAM177A1	48.1998	1.13053	0	0		ENSSSCG00000014361	15.255
NRG1	30.2052	2.18191	1.5537e-187	2.7751e-186		EIF2A	61.259	1.11042	0	0		LITAF	51.9177	2.59787	0	0		ENSSSCG00000016186	14.8407	1.00653	7.23466e-47	1.04214e-45		FADS2	8.72933	1.71521	7.20572e-17	7.07536e-16		ENSSSCG00000024070	16.7427	0.905316	2.22841e-60	2.94708e-59		SHISA5	37.3529	1.2157	1.23132e-283	2.52411e-282		AARD	48.0186	4.98819	0	0		MIER1	15.2356
MCM5	30.2046	1.4431	5.39526e-188	9.66902e-187		GRPR	60.9955	2.86227	0	0		ENSSSCG00000042799	51.78	2.70932	0	0		MIB1	14.8055	0.697862	1.09468e-46	1.57177e-45		ASCC3	8.72802	1.27795	7.23436e-17	7.09825e-16		EFNA5	16.74	0.770136	2.22947e-60	2.94708e-59		CITED2	37.3174	0.823083	4.02397e-284	8.2679e-283		VPS9D1	47.9721	1.06752	0	0		ENSSSCG00000048891	15.179
GRPR	30.1971	1.72267	7.95797e-188	1.42521e-186		NPHS1	60.8707	2.77216	0	0		POLD3	51.7773	1.458	0	0		DDX39B	14.7962	0.669079	1.22264e-46	1.75362e-45		NCAPH2	8.71827	1.68991	7.81811e-17	7.66256e-16		SSTR1	16.7372	1.75585	2.72624e-60	3.59661e-59		PSMB1	37.2625	0.509102	1.03464e-284	2.13242e-283		ENSSSCG00000045098	47.9674	1.25709	0	0		CD200	15.178
SRRM2	30.088	0.602778	1.84889e-187	3.30014e-186		ENSSSCG00000037399	60.7633	1.4061	0	0		GAS6	51.7629	2.42534	0	0		TTLL1	14.7861	1.28681	1.53351e-46	2.19713e-45		TMEM59L	8.70493	1.5845	8.60851e-17	8.41865e-16		ENSSSCG00000008480	16.7223	0.550968	2.71341e-60	3.58145e-59		ATXN10	37.2089	0.635153	1.70446e-283	3.49133e-282		ACVR1C	47.8886	2.50943	0	0		DNER	15.169
RPL22	30.0829	0.260267	1.94256e-190	3.51442e-189		DAG1	60.74	1.38811	0	0		ENSSSCG00000051329	51.6847	3.16375	0	0		ENSSSCG00000025281	14.7329	0.567144	2.67769e-46	3.81593e-45		IQGAP3	8.68473	2.98641	1.01061e-16	9.85068e-16		PTPRH	16.712	1.44735	3.94589e-60	5.20049e-59		HSPB8	37.1981	1.24002	1.43798e-281	2.93645e-280		ENSSSCG00000008222	47.884	0.526521	0	0		RNF146	15.1491
PCLAF	30.0465	1.88012	6.20571e-186	1.10104e-184		NFIA	60.6955	0.877357	0	0		RASSF4	51.6276	2.06937	0	0		HNRNPA3	14.7321	0.510054	2.63438e-46	3.75622e-45		PLAGL1	8.67711	1.4711	1.05724e-16	1.02902e-15		SLC25A4	16.7003	0.622416	3.96799e-60	5.22704e-59		ENSSSCG00000032808	37.0624	1.1191	1.85356e-279	3.75346e-278		ST8SIA3	47.8543	2.46938	0	0		KIF12	15.1483
ENSSSCG00000026488	30.0257	0.720103	1.49239e-186	2.6567e-185		FREM2	60.6694	1.96182	0	0		PARD6B	51.5391	1.79239	0	0		TNKS	14.7307	0.807717	2.99858e-46	4.26866e-45		SCIN	8.67092	2.23029	1.114e-16	1.08268e-15		RAPGEFL1	16.6915	1.67181	5.59631e-60	7.35385e-59		TTC13	37.0536	1.27115	2.4606e-279	4.97893e-278		ENSSSCG00000012362	47.68	2.68392	0	0		SELENOM	15.134
CXXC5	30.0251	0.814488	1.6386e-186	2.91502e-185		IMMP2L	60.4513	0.778398	0	0		ZMYND8	51.515	1.24809	0	0		C21orf91	14.7298	1.22381	3.19204e-46	4.54163e-45		NCAPH	8.66501	1.77504	1.15899e-16	1.12476e-15		PKIB	16.6717	0.475359	5.08124e-60	6.68361e-59		WFDC2	37.0333	0.709757	3.0957e-281	6.30232e-280		YPEL3	47.5955	0.821327	0	0		ZFYVE19	15.0983
IMMP2L	29.9272	0.558671	7.13945e-186	1.26586e-184		ZNHIT1	60.3598	0.710687	0	0		PDLIM5	51.4887	1.5364	0	0		HYPK	14.7141	0.332178	3.25138e-46	4.62359e-45		YWHAZ	8.66117	0.570282	1.16359e-16	1.12882e-15		NDST4	16.6693	4.59004	8.8882e-60	1.16623e-58		PCBP4	36.9935	1.15766	1.02272e-278	2.06474e-277		ENSSSCG00000039222	47.5281	0.954461	0	0		CSPP1	15.0912
DDOST	29.9203	0.491622	7.68311e-186	1.36135e-184		NSA2	60.3264	0.725687	0	0		MAN2A2	51.4869	1.23532	0	0		SPAG9	14.6827	1.02756	5.77632e-46	8.19229e-45		KIF2A	8.65926	1.17048	1.20201e-16	1.16524e-15		UGT2B31	16.6462	2.57999	1.19917e-59	1.57035e-58		CAPSL	36.9394	1.13095	2.8842e-278	5.814e-277		GLYCTK	47.3059	1.19559	0	0		ENSSSCG00000043455	15.0625
TPM4	29.9128	0.704719	1.4039e-185	2.48424e-184		ENSSSCG00000049934	60.1781	1.05929	0	0		FGFR4	51.4468	1.54751	0	0		FADS1	14.6822	1.37154	6.02992e-46	8.54742e-45		BRCA1	8.65917	2.36279	1.21575e-16	1.17727e-15		GAL3ST1	16.6445	1.11832	1.06466e-59	1.39558e-58		MRPL43	36.9193	0.748794	8.04344e-279	1.62509e-277		ENSSSCG00000013052	47.3043	0.714631	0	0		ZEB1	15.0335
SVIL	29.9089	1.15555	7.82099e-185	1.38028e-183		SEC31A	60.1243	0.987256	0	0		TNNI1	51.3991	3.07604	0	0		FUS	14.6507	0.499732	7.72419e-46	1.09374e-44		UOX	8.65722	0.43553	1.20444e-16	1.16674e-15		ENSSSCG00000051610	16.6438	1.61891	1.15414e-59	1.51213e-58		FAM104A	36.9155	1.26684	2.49022e-277	5.00089e-276		ENSSSCG00000004703	47.2885	2.18902	0	0		MRPL33	15.0205
GINS2	29.9005	1.44782	1.9043e-184	3.35189e-183		SLC7A7	60.0026	1.98713	0	0		PCDH9	51.3959	1.60356	0	0		PGM2	14.6487	1.30531	9.26073e-46	1.30853e-44		CENPM	8.657	2.39493	1.235e-16	1.19548e-15		CCDC181	16.6434	0.6596	9.67923e-60	1.2694e-58		UROS	36.9015	1.02486	7.75589e-278	1.56108e-276		RCAN3	47.068	1.52894	0	0		HCN4	15.0173
PDCD4	29.8888	0.611579	6.11906e-186	1.08639e-184		ALG5	59.876	1.30014	0	0		SPPL2A	51.3445	1.58179	0	0		ENSSSCG00000037143	14.6437	0.541533	8.69326e-46	1.22965e-44		LGALS1	8.64909	2.88664	1.31613e-16	1.2717e-15		KCNN2	16.6326	3.33369	1.51878e-59	1.98304e-58		PEX5L	36.8138	1.1445	8.78274e-277	1.76111e-275		CABCOCO1	47.0423	1.38801	0	0		SEZ6L2	15.0072
BIRC5	29.872	2.0402	8.56663e-184	1.50291e-182		SLC31A2	59.7683	2.21944	0	0		PGAM1	51.1063	0.701815	0	0		REEP3	14.6369	0.978435	1.03621e-45	1.46261e-44		IFT80	8.64542	1.3431	1.33619e-16	1.29015e-15		DNAJB1	16.5557	0.596501	3.43681e-59	4.47205e-58		RNF146	36.7915	0.923212	1.60618e-276	3.21827e-275		GABARAPL1	46.88	1.04054	0	0		ENSSSCG00000001931	14.9828
MCM2	29.8712	1.42199	3.24442e-184	5.70698e-183		ERO1B	59.717	0.899978	0	0		NME7	51.0901	1.15755	0	0		XRN2	14.6132	0.816051	1.38818e-45	1.95423e-44		ENSSSCG00000006395	8.64353	0.854512	1.33998e-16	1.29334e-15		NDUFA6	16.5458	0.453521	3.96635e-59	5.14853e-58		PRDX3	36.7506	0.594251	3.90095e-277	7.82804e-276		EXTL1	46.8699	1.40037	0	0		SNCB	14.9605
UBE2C	29.8662	2.27185	1.26109e-183	2.20951e-182		ENSSSCG00000027678	59.5309	1.80745	0	0		TAC4	51.0264	5.01711	0	0		ENSSSCG00000008892	14.6079	1.11434	1.54474e-45	2.17348e-44		MAP2	8.63664	0.80734	1.40159e-16	1.35203e-15		ENSSSCG00000027746	16.5441	0.353955	3.87925e-59	5.03791e-58		PIP5K1C	36.749	1.70676	2.36533e-274	4.697e-273		LRRN3	46.8379	2.02228	0	0		MVP	14.9464
ENSSSCG00000027270	29.8581	0.695622	8.1046e-185	1.42938e-183		FOXP2	59.4188	1.96393	0	0		EVC	50.9842	3.55469	0	0		LRP8	14.6065	2.60311	1.72887e-45	2.43127e-44		EIF4G2	8.61757	1.07248	1.62925e-16	1.56574e-15		PNMA2	16.5284	3.46234	7.49082e-59	9.70456e-58		LAMTOR1	36.7064	0.795526	1.08279e-275	2.16469e-274		CELF4	46.8278	1.55302	0	0		ENSSSCG00000024791	14.9359
HNRNPU	29.8074	0.464257	1.43285e-184	2.52541e-183		SNORD72	59.4023	1.49195	0	0		SEMA6A	50.8849	1.94523	0	0		ENSSSCG00000000107	14.5823	1.18663	2.16733e-45	3.04466e-44		ENSSSCG00000015814	8.61422	1.45487	1.6796e-16	1.61122e-15		U6-727	16.5251	1.67862	7.10956e-59	9.2196e-58		PCDH9	36.6178	1.12336	1.04399e-274	2.07622e-273		TALDO1	46.7728	0.594618	0	0		ENSSSCG00000049247	14.9249
PELI2	29.7314	0.773498	1.9759e-183	3.45965e-182		CYTB	59.3858	1.12538	0	0		LMF1	50.7249	0.982625	0	0		RIMS2	14.5702	1.15025	2.54465e-45	3.56719e-44		SLF1	8.60221	1.43626	1.83607e-16	1.75816e-15		LEPR	16.5233	1.45406	7.20423e-59	9.33781e-58		QDPR	36.5827	0.633744	1.38549e-274	2.75331e-273		ENSSSCG00000048146	46.7589	1.90299	0	0		DNAJC24	14.912
[truncated: 8 more columns]

## Sheet: Sheet2
Sheet2: Marker genes of cell clusters in human integrated scRNA-seq atlas
MPC						Acinar						Ductal						EP						Alpha						Beta						Delta						PP						Epsilon
name	scores	logfoldchanges	pvals	pvals_adj		name	scores	logfoldchanges	pvals	pvals_adj		name	scores	logfoldchanges	pvals	pvals_adj		name	scores	logfoldchanges	pvals	pvals_adj		name	scores	logfoldchanges	pvals	pvals_adj		name	scores	logfoldchanges	pvals	pvals_adj		name	scores	logfoldchanges	pvals	pvals_adj		name	scores	logfoldchanges	pvals	pvals_adj		name	scores
DLK1	97.4347	1.58515	0	0		CPA2	449.9	6.18423	0	0		SLC4A4	156.252	3.37597	0	0		TUBA1A	108.936	3.53606	0	0		CHGA	252.548	5.20747	0	0		INS	464.888	7.97632	0	0		SST	332.095	10.3731	0	0		PPY	78.8646	12.8101	4.54563e-246	8.74349e-244		GHRL	132.753
FLRT2	83.809	1.72977	0	0		CTRB2	425.334	7.55618	0	0		ATP1B1	155.37	2.68996	0	0		STMN1	100.944	2.26816	0	0		TTR	220.787	6.12694	0	0		GNAS	220.745	2.45093	0	0		ISL1	92.8435	3.0928	0	0		TTR	73.3608	4.3774	8.28233e-245	1.55562e-242		ACSL1	85.0172
TM4SF1	82.2823	1.66205	0	0		CTRB1	403.78	7.4657	0	0		CCND1	144.307	3.61504	0	0		SOX4	89.9484	2.45544	0	0		GCG	166.825	8.89832	0	0		STMN2	211.459	3.95172	0	0		TPD52	83.2248	2.61947	0	0		TIMP1	39.5995	3.42437	3.50721e-141	2.7247e-139		S100A6	65.8318
PAPSS1	78.9488	1.60939	0	0		CLPS	381.191	8.819	0	0		ANXA2	143.714	3.08918	0	0		NEUROD1	70.6748	2.42563	0	0		CRYBA2	138.674	4.60372	0	0		ERO1B	211.035	3.18126	0	0		SEC11C	82.8083	2.04376	0	0		FXYD2	36.8674	3.00698	1.05802e-131	7.28076e-130		CPE	61.352
ID2	77.6827	1.76978	0	0		ERP27	356.652	4.84301	0	0		GSTP1	142.684	1.65728	0	0		MDK	69.4794	1.74439	0	0		ALDH1A1	134.499	2.6168	0	0		TTR	210.979	3.44657	0	0		CHGB	76.8988	3.46348	0	0		CHGA	33.2379	2.69212	7.70379e-119	4.59779e-117		ASAH1	47.7114
MEST	76.1529	1.41185	0	0		CELA3A	352.8	7.98996	0	0		DCDC2	138.589	3.47092	0	0		SSTR2	68.0177	2.87425	0	0		GNAS	125.75	2.57331	0	0		RBP4	200.87	5.65301	0	0		SCGN	75.3917	2.05958	0	0		UBB	30.5728	1.22093	4.24688e-108	2.21936e-106		STMN2	47.1397
SOX6	70.9502	1.75598	0	0		SPINK1	345.011	5.41387	0	0		TTYH1	135.657	3.58002	0	0		TUBB2B	66.724	2.95282	0	0		ISL1	106.188	2.96658	0	0		PLAGL1	187.7	3.98879	0	0		PCP4	73.6941	4.29609	0	0		CPE	29.8761	2.00683	5.16014e-105	2.6029e-103		C12orf75	46.1449
PHGDH	69.8647	1.35383	0	0		SYCN	344.263	7.43739	0	0		ANXA4	122.199	2.32594	0	0		NNAT	66.1302	3.55211	0	0		IRX2	100.326	6.77009	0	0		PAX6	181.452	3.51748	0	0		S100A6	72.0226	2.58463	0	0		STMN2	28.6765	2.717	1.07417e-99	5.01435e-98		PKIB	44.2024
UGDH	69.6754	1.35834	0	0		GATM	329.616	4.1609	0	0		MDK	120.601	1.97534	0	0		INSM1	62.2642	2.71676	0	0		CPE	99.068	2.18812	0	0		MEIS2	177.542	2.74628	0	0		PCSK2	69.5859	3.49256	0	0		SEC11C	28.1649	1.87246	1.35528e-97	6.16438e-96		CHGB	43.4306
MARCKSL1	68.0648	1.43818	0	0		CPA1	327.519	7.2965	0	0		CFTR	119.052	4.3016	0	0		CD24	61.7231	1.13865	0	0		SCG2	98.4752	3.79746	0	0		HADH	166.704	3.71886	0	0		CHGA	67.7032	2.21703	0	0		ATP5E	27.3734	1.45076	1.44374e-94	6.34095e-93		LY6H	41.3676
SOX9	67.5818	1.7694	0	0		CELA3B	304.105	7.26101	0	0		S100A10	111.971	2.30491	0	0		FNBP1L	60.6794	1.65793	0	0		MAFB	93.1082	2.86228	0	0		SLC30A8	163.783	4.28032	0	0		NEUROD1	64.4765	2.40202	0	0		SCG5	27.1529	1.69054	2.04355e-94	8.9507e-93		HEPACAM2	41.0523
C14orf105	64.8348	1.91624	0	0		RARRES2	289.011	5.42855	0	0		KRT19	110.665	1.98336	0	0		DBN1	60.2118	2.19851	0	0		GLS	91.5098	3.74652	0	0		CHGA	162.24	2.94788	0	0		TTR	61.9443	2.64975	0	0		BEX1	26.8893	1.76018	2.53303e-92	1.0784e-90		QDPR	40.3082
CALD1	64.7557	1.34491	0	0		DPEP1	280.263	4.43905	0	0		COL18A1	108.615	3.20215	0	0		H3F3A	58.4166	0.672236	0	0		PAX6	87.7201	2.47661	0	0		MAFB	158.105	3.41862	0	0		SCG3	60.0013	2.11463	0	0		MYL6	25.6263	1.08329	4.85365e-87	1.9494e-85		ARX	39.9227
RHOBTB3	64.4179	1.11531	0	0		SERPINI2	277.087	5.41649	0	0		SFRP5	104.938	2.95568	0	0		HEPACAM2	56.8276	2.45716	0	0		CHGB	84.8346	2.8511	0	0		SCGN	150.676	2.49097	0	0		PLD3	59.5362	1.77938	0	0		SCGN	25.3764	1.99192	6.91652e-86	2.73322e-84		SCG2	39.2921
ONECUT1	63.4495	1.98276	0	0		CEL	272.407	6.73985	0	0		IGF2	103.488	1.39363	0	0		TUBB	56.5745	1.44716	0	0		SCG3	83.2034	2.3036	0	0		PCSK1	145.998	4.02744	0	0		BEX1	58.9279	1.46224	0	0		OAZ1	25.33	1.50431	1.50007e-85	5.90594e-84		BEX1	39.2688
SERPINA1	63.0353	1.53348	0	0		GP2	267.019	6.95482	0	0		GMNN	101.236	1.80826	0	0		RBP1	56.46	0.974949	0	0		PCSK1N	80.3064	3.36609	0	0		ACVR1C	145.268	4.4732	0	0		HEPACAM2	58.5144	2.69377	0	0		RPL13A	24.8245	0.71105	2.64398e-84	1.02082e-82		PCSK1N	38.8892
TCF12	62.451	1.64295	0	0		TPT1	265.665	1.70382	0	0		CALD1	98.3227	1.81726	0	0		CHGA	55.5863	2.3975	0	0		SCG5	78.7017	1.62106	0	0		CPE	143.373	2.40266	0	0		ERO1B	56.263	1.79645	0	0		MIR7-3HG	24.6766	3.31794	1.68832e-82	6.37211e-81		WNK3	37.8728
KCTD16	62.1483	1.97394	0	0		CTRC	263.023	7.11613	0	0		KRT8	92.3185	1.28201	0	0		TMSB10	55.528	1.19066	0	0		PLD3	78.4976	1.83206	0	0		PCSK1N	135.111	4.22189	0	0		C3orf14	56.1092	2.58175	0	0		CALM2	24.5809	1.48754	2.11256e-82	7.95447e-81		VSTM2L	37.4252
GSTP1	61.7577	0.803106	0	0		PLA2G1B	261.591	6.31259	0	0		KRT18	90.2147	1.35517	0	0		CPE	54.8873	1.44483	0	0		FXYD3	75.3185	3.06416	0	0		NEUROD1	131.615	2.74087	0	0		CPE	55.7841	1.74963	0	0		NGFRAP1	24.2157	1.38094	8.51037e-81	3.127e-79		CEP126	36.2688
SOX4	61.6086	1.11856	0	0		SSR4	250.208	2.57924	0	0		ID2	89.1128	1.86239	0	0		SCGN	54.5249	1.75053	0	0		ATP5E	73.7218	1.44457	0	0		ASB9	127.852	4.55782	0	0		GAD2	54.9593	2.9623	0	0		PAX6	23.516	2.4127	1.06024e-77	3.72424e-76		WSB1	35.8421
CNN3	61.08	1.25993	0	0		RAMP1	245.826	4.3524	0	0		CNN3	88.4409	1.65857	0	0		NKX2-2	54.3441	2.61433	0	0		BEX1	73.4752	1.51299	0	0		SCG3	121.007	2.54741	0	0		HHEX	54.2304	2.97934	0	0		FXYD3	22.2322	2.90242	5.21319e-72	1.68992e-70		SPTSSB	35.6835
TMEM123	60.2263	1.17058	0	0		RRBP1	231.684	3.15395	0	0		ISYNA1	87.9753	1.91138	0	0		MAP1B	53.0284	2.05382	0	0		QPCT	70.0658	2.7486	0	0		UCHL1	114.58	2.97978	0	0		TMSB4X	51.5184	1.3262	0	0		CHGB	21.4098	2.62301	1.82161e-68	5.57661e-67		FGF14	35.6586
HMGA2	58.4477	1.7062	0	0		MT1E	229.843	5.34715	0	0		FRMD4A	86.9564	3.11396	0	0		TAC3	52.8013	4.01453	0	0		C5orf38	69.4813	7.0686	0	0		TUBA1A	111.875	2.2512	0	0		HADH	48.24	1.98873	0	0		C15orf48	20.9838	3.72597	1.65244e-66	4.87188e-65		KCTD12	35.0191
COL1A2	58.3064	2.38921	0	0		RPL10	229.141	1.71684	0	0		TMSB10	84.9467	1.1515	0	0		PCBP4	52.1159	2.84699	0	0		NEUROD1	69.1602	2.09159	0	0		MAP1B	109.647	2.70944	0	0		UCHL1	46.2255	2.0623	0	0		TM4SF4	20.6286	2.11407	4.22549e-65	1.22321e-63		ACOT7	34.679
ZNF385B	58.1925	2.58582	0	0		PRSS1	225.899	7.18695	0	0		BICC1	84.2818	3.29986	0	0		SCG3	51.9759	1.69563	0	0		ERO1B	67.5742	1.76029	0	0		ISL1	107.164	2.30642	0	0		QPCT	45.9615	2.34824	0	0		ABCC8	20.5036	2.90332	1.9113e-64	5.45377e-63		APLP1	33.3502
ADAMTS9	56.1089	2.28067	0	0		MT1G	224.154	6.55184	0	0		NDUFA4	82.0719	1.15513	0	0		DDX5	50.8757	0.848534	0	0		SLC30A8	66.4425	2.69766	0	0		FFAR1	103.421	3.64464	0	0		CRH	45.7238	8.16912	0	0		FABP5	20.299	2.47881	1.41418e-63	3.94365e-62		CALY	32.4315
SERINC5	55.6724	1.4351	0	0		REG3G	220.19	6.55418	0	0		CLDN6	81.9345	2.49293	0	0		HN1	50.1655	1.63303	0	0		QDPR	65.9275	2.01278	0	0		CRYBA2	101.536	2.58501	0	0		ARFGEF3	45.6447	2.82423	0	0		PLD3	19.7431	1.79598	3.32571e-61	8.84916e-60		VAMP2	32.3757
CYR61	55.3488	1.67048	0	0		KLK1	219.001	7.1279	0	0		ATP1A1	81.1579	1.73907	0	0		DSP	49.9634	1.36724	0	0		KCNK16	65.661	2.91749	0	0		ATP5E	98.2088	1.37742	0	0		RBP4	45.5388	2.29418	0	0		FXYD6	19.1682	2.52082	1.22748e-58	3.12547e-57		TCEAL2	32.1599
ZFP36L2	55.3253	1.1941	0	0		MT2A	218.319	5.56165	0	0		HMGA2	81.0353	2.19566	0	0		STMN2	49.9167	2.24134	0	0		ARX	65.2852	4.63922	0	0		MFAP4	97.4352	4.37868	0	0		BEX2	45.0403	1.46412	0	0		ATP6V0B	19.152	1.5742	1.23082e-58	3.13148e-57		SSTR2	31.9356
IGF2	55.1562	0.993863	0	0		P4HB	217.332	2.74382	0	0		ID3	80.8961	2.53759	0	0		CACNA2D1	48.2122	2.96892	0	0		ITGB1	64.4304	1.24714	0	0		HPCA	92.0716	3.97633	0	0		MAP1B	44.3616	1.94039	0	0		QPCT	19.058	2.61687	3.69372e-58	9.33074e-57		CHL1	31.7976
CPA2	54.3925	1.33392	0	0		RPS14	207.212	1.46659	0	0		NTRK2	80.842	3.99828	0	0		RPAIN	48.0765	1.35903	0	0		PTPRN	64.0216	2.65952	0	0		STX1A	91.9781	3.31091	0	0		VAMP2	43.8995	1.49556	0	0		RAB11A	18.9882	1.64046	6.5784e-58	1.65003e-56		FGF12	31.7834
COL2A1	54.2061	2.09819	0	0		RPS5	198.701	1.58535	0	0		RBP1	80.1221	0.954107	0	0		PAX4	47.9814	5.08602	0	0		C15orf48	63.013	3.73647	0	0		INSM1	91.4191	2.56749	0	0		LEPR	43.6399	6.15132	1.17965e-303	1.20339e-301		MALAT1	18.7465	1.19266	6.06804e-57	1.50546e-55		RGS17	31.4103
FRAS1	54.1233	1.84038	0	0		RPS18	197.55	1.45075	0	0		LYPD6B	78.5837	3.2617	0	0		TAGLN3	47.8607	2.70695	0	0		CALM1	62.2691	0.971476	0	0		KIF5C	91.2893	3.49273	0	0		PPP1R1A	43.1943	3.52613	8.54617e-300	8.63542e-298		MEIS2	18.4397	1.55023	1.37496e-55	3.32595e-54		BEX2	31.3443
NR5A2	54.0052	1.53046	0	0		RPL29	191.756	1.47753	0	0		C14orf105	77.2331	2.09693	0	0		KRT19	46.782	1.5106	0	0		ARFGEF3	60.4162	2.85078	0	0		PARVB	91.0997	3.77033	0	0		MIR7-3HG	42.7594	2.33363	1.8858e-297	1.88167e-295		GAPDH	18.3304	0.985356	3.71068e-55	8.92855e-54		ITGB1	31.2711
REST	53.8679	1.55807	0	0		SEL1L	191.196	3.19876	0	0		APLP2	77.0067	1.29546	0	0		CADPS	46.1291	1.39769	0	0		CEP126	60.0923	2.96334	0	0		MEAF6	90.9792	1.85946	0	0		QDPR	41.8621	1.67953	2.77251e-289	2.68262e-287		ETV1	18.1313	4.04504	4.49179e-54	1.05613e-52		NEUROD1	30.8547
ANXA5	53.8273	0.856115	0	0		CPB1	188.61	6.54498	0	0		SYNE2	76.3295	1.60037	0	0		MARCKS	46.0406	1.19073	0	0		SEZ6L2	60.0568	1.72125	0	0		MAFA	90.363	5.3746	0	0		ATP5E	41.8496	1.06175	1.46522e-292	1.43952e-290		BRK1	18.1161	1.42171	4.02782e-54	9.47741e-53		ZKSCAN1	30.7891
CLDN6	53.4815	1.67208	0	0		RPS12	186.013	1.33055	0	0		TPM1	74.8835	1.58594	0	0		CXXC4	45.8944	1.75343	0	0		FABP5	59.6984	2.14418	0	0		PDCD5	90.1025	1.62048	0	0		TIMP1	41.1636	2.07144	8.94517e-281	8.52595e-279		SCG3	17.848	1.90338	5.85512e-53	1.34306e-51		ISL1	30.7547
FAT1	53.1981	1.48147	0	0		TFF3	185.496	4.10128	0	0		TM4SF1	73.9799	1.44157	0	0		HES6	45.771	3.56356	0	0		TUBA1A	59.407	1.72459	0	0		TIMP1	89.7078	2.16635	0	0		MAFB	40.8888	1.84344	2.90564e-280	2.76122e-278		GABARAPL2	17.8369	1.52601	6.87204e-53	1.57181e-51		NKX2-2	30.4509
RBPJ	53.1933	1.01056	0	0		AMBP	183.971	3.17774	0	0		GUCY1A2	73.8927	2.13613	0	0		MARCKSL1	45.7482	1.46369	0	0		F10	59.109	2.99549	0	0		IGFBP5	89.6215	2.50772	0	0		SAMD5	40.2435	3.13216	1.72969e-269	1.57797e-267		HMGN3	17.3446	1.18512	8.65182e-51	1.90914e-49		SCGN	30.3082
CDH1	53.1792	1.11125	0	0		FTH1	180.473	1.95567	0	0		CLDN10	73.4782	1.55082	0	0		HDAC2	44.8084	1.25143	0	0		APLP1	58.8304	2.28153	0	0		ROBO2	89.5442	4.31038	0	0		CEP126	38.9699	2.481	3.46642e-257	3.01588e-255		CRIP2	17.3041	2.36004	1.55726e-50	3.42447e-49		DST	29.6834
ZNF704	51.6076	1.3802	0	0		MT1F	179.338	3.33489	0	0		CTTNBP2	72.8256	2.38805	0	0		MAP2	44.3813	2.08168	0	0		BEX2	58.8033	1.48835	0	0		TPD52	89.5268	1.84665	0	0		LINC00643	38.9475	2.61751	1.1932e-256	1.03249e-254		PCSK2	17.2513	2.60782	2.64228e-50	5.77072e-49		F10	29.6121
RPL23	51.5052	0.580447	0	0		CD63	179.159	1.79229	0	0		GYPC	70.9728	2.49732	0	0		PRDX1	43.2086	1.21455	0	0		SLC7A2	57.9305	2.12614	0	0		PLCXD3	88.4665	3.20499	0	0		PCSK1N	38.8427	2.14619	4.53687e-259	3.99069e-257		ITM2C	17.2325	1.52295	2.88915e-50	6.29697e-49		TERF2IP	29.5086
APOE	51.365	2.16369	0	0		MT1X	178.484	4.44362	0	0		SCTR	69.1803	2.3774	0	0		IGFBP5	43.1845	2.35079	0	0		TIMP1	56.893	1.93065	0	0		SMIM24	87.8585	3.45432	0	0		GABRB3	38.4214	2.64742	4.07581e-251	3.452e-249		CFL1	17.2208	1.00333	2.81209e-50	6.1332e-49		TRNP1	29.4569
APLP2	51.1575	0.951957	0	0		NUCB2	177.619	2.63766	0	0		COL9A3	68.9851	3.84384	0	0		CHD7	42.8934	1.4412	0	0		ATP6V0B	56.1277	1.3401	0	0		NRXN1	86.1964	2.66861	0	0		PTPRN	38.09	2.04601	6.04525e-249	5.10648e-247		CUTA	17.1895	1.26817	4.09763e-50	8.90657e-49		HMP19	29.351
KLF3	50.883	1.44006	0	0		AQP8	176.956	5.76583	0	0		WWTR1	68.7409	2.61226	0	0		NUDT4	42.743	1.59217	0	0		NRXN1	55.3168	2.31895	0	0		TBCB	84.9032	1.89723	0	0		FAM213A	37.7338	1.30122	2.09092e-246	1.73862e-244		ATP6V1G1	17.0656	1.19298	1.40885e-49	3.01707e-48		PHGR1	29.2386
CAPN6	50.7475	2.5361	0	0		PRDX4	176.448	2.64283	0	0		VEPH1	68.4874	3.01169	0	0		RGS4	42.4219	2.68121	0	0		SLC7A8	55.2466	2.48622	0	0		NLRP1	84.1762	2.68518	0	0		NUDT4	36.9517	1.92135	1.85672e-236	1.5047e-234		BSG	17.0329	1.34138	1.99863e-49	4.26011e-48		PDE8B	28.9267
NCL	50.7123	0.745166	0	0		REG1A	175.741	6.48788	0	0		COL6A1	66.9581	1.94818	0	0		KCNK17	42.4041	3.54616	0	0		SSTR2	55.0495	2.10538	0	0		ECEL1	83.0396	5.42847	0	0		AMIGO2	36.4357	4.12057	4.01841e-230	3.17593e-228		DYNLT1	16.8154	1.56092	1.80668e-48	3.77041e-47		PGAM2	27.9157
DLL1	50.1793	2.42235	0	0		RBPJ	175.712	2.55843	0	0		EHF	65.8518	2.16598	0	0		TMSB4X	42.1626	1.07652	0	0		EMC10	54.0184	1.42359	0	0		FXYD3	82.0402	2.51113	0	0		PKM	36.2738	1.19863	1.55661e-231	1.23638e-229		PKM	16.7786	1.54137	2.61563e-48	5.44795e-47		DIRAS3	27.7562
HIST1H1E	49.983	1.64185	0	0		PLTP	174.169	4.95804	0	0		LAPTM4B	65.3281	1.40471	0	0		SMIM6	41.8817	1.90977	0	0		C4orf48	52.808	2.3724	0	0		GNG4	81.6908	3.46141	0	0		TUBA1A	36.1876	1.47411	1.02897e-231	8.19324e-230		SCGB2A1	16.7342	4.04747	4.82266e-48	9.98623e-47		PLD3	27.3866
LGR4	49.6742	1.33826	0	0		PRSS2	171.64	6.38593	0	0		S100A11	65.16	1.76719	0	0		CNIH2	41.2367	2.14417	0	4.53586e-307		SCGN	52.3673	1.41147	0	0		CALM1	80.8922	0.985676	0	0		STMN2	36.0416	1.57787	1.91521e-230	1.51743e-228		STMN1	16.704	1.33853	4.6305e-48	9.60078e-47		SEZ6L2	27.3125
TMSB10	49.4622	0.675252	0	0		CYBA	171.625	3.17733	0	0		IFITM3	65.1159	1.58063	0	0		MLLT11	41.2106	2.40335	6.61668e-308	5.83621e-306		TERF2IP	50.657	1.48135	0	0		PRDX5	80.3907	1.24128	0	0		RGS17	35.8739	2.62584	3.24892e-225	2.49971e-223		ISL1	16.6745	1.85602	6.8466e-48	1.41314e-46		SAMD5	26.992
MDK	48.9821	0.932696	0	0		PNLIPRP1	171.238	6.77091	0	0		PRSS35	64.788	3.04305	0	0		C10orf35	40.911	2.00164	5.21989e-305	4.49248e-303		COX8A	50.625	1.10039	0	0		NPDC1	79.2265	2.52932	0	0		LY6H	35.8408	3.99492	2.83443e-224	2.17035e-222		SLC25A6	16.6083	0.954466	1.20869e-47	2.48349e-46		TUBA1A	26.5426
QKI	48.3043	1.48422	0	0		EEF1D	170.786	1.89841	0	0		TUBB	64.5786	1.17359	0	0		CFL1	40.5869	0.743863	1.22344e-305	1.05866e-303		FXYD6	49.7267	2.08075	0	0		C1QL1	78.9074	4.00673	0	0		ACSL1	35.5758	3.51295	5.10281e-222	3.84275e-220		EIF4A2	16.577	1.15563	1.85416e-47	3.78538e-46		PTPRN	26.3468
COL27A1	48.1276	1.71687	0	0		PLBD1	170.389	4.16788	0	0		NOTCH2	64.5401	2.74926	0	0		DDAH2	39.8433	1.22134	5.46387e-294	4.53146e-292		TPD52	48.1991	1.35795	0	0		ABCC8	78.1339	2.45946	0	0		INSM1	35.5515	1.7906	1.74059e-223	1.32642e-221		UCHL1	16.5644	2.00503	2.19732e-47	4.47451e-46		BHMT	26.0312
HNRNPA1	47.987	0.574069	0	0		RPL18A	169.709	1.26371	0	0		ID1	64.5301	2.15192	0	0		NREP	39.7241	1.01684	1.07045e-293	8.8548e-292		EDN3	47.7379	2.66041	0	0		FXYD2	77.8615	1.79879	0	0		ATP6V0B	35.1765	1.08601	1.75334e-220	1.30195e-218		ERO1B	16.4302	1.46529	6.72119e-47	1.34973e-45		ALDH1A1	25.9428
TTYH1	47.6944	1.33627	0	0		RPS9	169.212	1.17012	0	0		HMGB2	64.4705	2.00999	0	0		PKM	39.561	1.03385	1.26904e-291	1.03633e-289		FAM46A	47.7148	2.3842	0	0		CAMK2N1	77.4004	1.80482	0	0		TMEM176B	35.025	3.34548	2.86957e-216	2.0824e-214		FTL	16.3831	0.714177	8.38362e-47	1.67725e-45		CLEC4G	25.7396
MTCL1	47.5211	2.01237	0	0		DLK1	167.935	2.7857	0	0		TCF12	64.3161	1.55105	0	0		PTMA	39.3589	0.500382	9.44207e-291	7.67138e-289		VAMP2	47.6582	1.27808	0	0		NT5DC2	76.6605	2.29776	0	0		PARVB	34.4003	2.22337	4.97046e-211	3.54256e-209		NEUROD1	16.2244	1.80009	5.82237e-46	1.14546e-44		ARFGEF3	25.6479
TGIF1	47.5058	1.56105	0	0		RPL34	167.653	1.55462	0	0		FXYD2	63.2059	1.599	0	0		PRDX2	39.058	0.688896	1.58457e-286	1.25859e-284		TUBA4A	47.5878	1.90005	0	0		TUBB2B	74.9337	2.30838	0	0		NCAM1	33.8327	2.56354	9.37949e-205	6.52478e-203		GNAS	16.1849	0.942381	5.56764e-46	1.09602e-44		KCNJ6	25.4942
SMARCC1	47.1614	1.06563	0	0		XBP1	167.388	2.60638	0	0		UGT2A3	62.2503	2.51911	0	0		XRCC5	38.9935	0.842307	4.34209e-285	3.41485e-283		COX17	47.474	1.51856	0	0		CADPS	74.3797	1.645	0	0		TMEM176A	33.691	3.59011	6.11061e-203	4.2232e-201		MPC2	16.1069	1.34352	1.9831e-45	3.861e-44		CALM1	25.4798
CLDN10	46.9292	1.03486	0	0		CYB5A	167.385	1.93066	0	0		AKAP7	61.5207	2.18006	0	0		ELAVL4	38.7447	1.9297	8.41863e-279	6.47728e-277		TMEM190	47.4301	2.88739	0	0		EGFL7	74.3299	2.83643	0	0		EMC10	33.3577	1.14319	4.72068e-202	3.22075e-200		VAMP2	15.973	1.53778	7.52807e-45	1.44889e-43		P4HTM	25.4433
SV2B	46.7091	1.96682	0	0		RPL18	165.538	1.1318	0	0		FRAS1	61.502	1.93126	0	0		ZKSCAN1	38.644	0.881024	3.75001e-281	2.92043e-279		KCNJ6	46.9934	2.40184	0	0		SLC29A1	73.5085	2.35534	0	0		MS4A8	33.2362	4.2573	2.48381e-198	1.67317e-196		RPL6	15.9694	0.580754	5.5818e-45	1.07625e-43		SCG3	24.9248
MEG3	46.262	0.729379	0	0		MT1H	164.727	6.13078	0	0		CAV2	61.3382	2.32845	0	0		DCX	38.521	1.89422	6.85397e-276	5.22308e-274		MIR7-3HG	46.1477	1.99778	0	0		PCSK2	73.3165	2.29412	0	0		GNAS	32.8755	0.953537	5.93676e-199	4.00763e-197		SCG2	15.7027	2.31232	1.10572e-43	2.06949e-42		RTN1	24.7425
SULT1C4	45.9613	1.94969	0	0		RPS4X	164.412	1.3008	0	0		HEY1	61.2381	2.67878	0	0		FAM213A	37.6019	1.0397	4.57698e-267	3.39079e-265		MOB1B	45.9352	2.20449	0	0		MIR7-3HG	72.7652	2.3851	0	0		EID1	32.873	0.786922	1.44916e-197	9.72095e-196		QDPR	15.6796	1.75785	1.35231e-43	2.52069e-42		OLFML3	24.6273
RBP1	45.7049	0.622082	0	0		HEXDC	163.168	3.75229	0	0		SDC4	60.8445	2.1626	0	0		OCIAD2	37.5838	1.01371	6.50323e-267	4.80667e-265		GC	45.9277	4.0673	0	0		MAN1A1	72.5836	1.90341	0	0		SYT4	32.1823	2.73631	1.87016e-188	1.21124e-186		BEX2	15.678	1.45432	1.32372e-43	2.47317e-42		ENPP1	24.4869
UTRN	45.595	1.18536	0	0		PPIB	162.945	1.62618	0	0		SOX9	60.8119	1.48403	0	0		S100A6	37.2743	1.41595	1.40859e-261	1.02685e-259		PTPRT	45.9174	4.83049	0	0		CHGB	71.9708	1.82668	0	0		APLP1	32.0287	1.63463	4.99357e-188	3.2211e-186		EDN3	15.56	2.75351	4.7108e-43	8.67951e-42		PEG10	24.4081
GOLM1	45.5865	1.18414	0	0		RPL32	159.087	1.23064	0	0		HES4	60.7543	2.41902	0	0		GNG8	37.1436	5.70898	4.72536e-257	3.36788e-255		HSD11B1L	45.7998	2.61237	0	0		GUK1	71.2425	1.33622	0	0		PKIB	31.7727	2.05842	5.71302e-185	3.61938e-183		ATP5L	15.4976	0.960829	7.20297e-43	1.32407e-41		IDS	23.4549
IL1R1	45.5837	1.60033	0	0		RPL12	158.952	1.23063	0	0		COL6A2	60.1002	2.62129	0	0		CALM2	36.8472	0.757095	5.38918e-259	3.87559e-257		PLK2	45.6011	2.04538	0	0		QPCT	71.0917	2.11412	0	0		ATP6AP2	31.6212	1.25847	4.10751e-184	2.58684e-182		PAM	15.1164	2.39837	3.46829e-41	6.1592e-40		CAMK2B	23.3565
FGFR4	45.441	1.34826	0	0		IL32	157.235	4.74118	0	0		SPTBN1	59.9581	1.28126	0	0		CBFA2T2	36.8286	2.06791	8.86793e-255	6.27834e-253		SLC3A2	45.5172	1.57178	0	0		ELAVL4	70.8897	2.60798	0	0		FGF14	31.6068	2.71996	5.51116e-183	3.44366e-181		SNAP25	15.0181	2.54077	8.98332e-41	1.57603e-39		CXXC4	23.1664
ACSM3	45.2165	1.54795	0	0		PDIA6	155.411	1.76592	0	0		DAB2	59.9248	3.42943	0	0		BASP1	36.7042	1.90679	1.07884e-253	7.60425e-252		PTPRN2	45.3205	1.90667	0	0		LMO2	70.5686	4.54794	0	0		NOL4	31.2165	1.94868	1.05468e-179	6.51372e-178		CISD1	14.9235	1.707	2.13823e-40	3.72876e-39		THSD4	23.0541
DSC2	45.2142	1.20806	0	0		RPL11	154.629	1.04181	0	0		IGFBP7	59.7539	1.61191	0	0		RFX6	36.5371	2.06398	9.79513e-252	6.84373e-250		NPDC1	45.2002	1.939	0	0		GLIPR2	70.2431	3.26059	0	0		COX17	31.2028	1.25539	2.61041e-180	1.61532e-178		SCP2	14.8842	1.4456	3.01665e-40	5.24057e-39		PCSK1	22.9733
RERE	44.8124	1.01645	0	0		RPS8	153.757	0.984452	0	0		FLRT2	59.749	1.19368	0	0		ARPC5	36.4597	0.985943	3.20669e-253	2.25528e-251		SERPINE2	45.1988	3.13495	0	0		FTL	70.1884	0.771659	0	0		STMN1	30.9661	0.966902	2.32189e-179	1.43124e-177		GSTA4	14.7317	1.85118	1.37721e-39	2.35913e-38		ELL2	22.8853
CLMN	44.7202	1.74273	0	0		RPL5	151.959	1.0243	0	0		HNRNPA1	59.4877	0.666228	0	0		RGS9	36.3734	2.1506	1.33551e-249	9.23002e-248		NOL4	44.4658	2.24125	0	0		GCK	69.6828	3.11815	0	0		MOB1B	30.7726	1.88418	2.51749e-175	1.51381e-173		MEAF6	14.7235	1.50176	1.41949e-39	2.42765e-38		SLC8A1	22.6345
PNRC1	44.5366	0.908148	0	0		LMAN2	151.896	2.16499	0	0		SLC38A1	58.9519	1.92173	0	0		AES	36.2316	0.9549	2.60222e-250	1.80628e-248		C9orf16	44.3562	1.26966	0	0		CRMP1	68.2804	2.69492	0	0		SEZ6L2	30.7251	1.18258	5.88664e-176	3.55985e-174		MT-CO1	14.6165	0.794633	3.55501e-39	6.02502e-38		TMED8	22.4505
RCN2	44.3868	1.04782	0	0		FKBP11	151.494	3.77278	0	0		NAALADL2	58.5561	2.19225	0	0		PHF14	35.882	1.08992	8.26971e-246	5.59432e-244		IGFBP5	44.0396	1.79204	0	0		OCIAD2	68.2476	1.3159	0	0		TCEAL3	30.616	1.5378	3.21885e-174	1.9175e-172		PSMB5	14.5979	1.18917	4.6431e-39	7.84413e-38		C4orf48	22.4336
ILF3	44.3497	0.873205	0	0		GNB2L1	151.277	1.12155	0	0		SAT1	58.2898	1.50837	0	0		SH3BGRL3	35.76	1.2024	7.09271e-244	4.77785e-242		KCTD12	43.9576	2.64038	0	0		TMEM196	68.0345	2.80122	0	0		CXXC4	30.5266	1.52151	2.5762e-173	1.5233e-171		TAGLN3	14.5906	2.55192	5.45283e-39	9.17811e-38		ATP2B1	22.3688
ZFP36L1	44.117	1.02105	0	0		RPL14	150.125	1.11413	0	0		ACSM3	58.0852	1.85435	0	0		MAD2L2	35.5889	2.04833	2.51123e-240	1.66011e-238		CDC42EP3	43.8595	1.96472	0	0		SYP	67.7932	2.22132	0	0		ANKS1B	30.4895	2.95185	3.46062e-172	2.02377e-170		EID1	14.5654	1.01685	6.30714e-39	1.06049e-37		ITM2C	22.2934
SLC4A4	43.9465	1.11811	0	0		RBPJL	150.043	3.79628	0	0		CADM1	58.0022	1.22386	0	0		VWA5B2	35.4686	2.00176	2.88943e-239	1.90619e-237		CNIH2	43.8266	2.10644	0	0		EEF1A2	67.7191	2.7	0	0		GPX4	30.0661	0.89783	1.55242e-169	8.97985e-168		RPS3A	14.5229	0.517425	6.46566e-39	1.086e-37		NIPSNAP1	21.9357
CD24	43.8803	0.60836	0	0		RPL13	150.02	1.52188	0	0		WNK2	57.828	1.59645	0	0		CACNA1A	35.4344	2.21443	1.8788e-238	1.23691e-236		CALY	43.6898	2.4308	0	0		PDE4DIP	67.381	2.18301	0	0		KIF5C	30.0546	1.89639	1.02078e-168	5.84114e-167		SOD1	14.4293	1.18127	2.35671e-38	3.89694e-37		DSP	21.8435
NES	43.8418	2.53545	0	0		RPL35	149.717	1.35613	0	0		CA4	57.5855	4.15567	0	0		CDKN1C	35.1629	1.22742	4.84956e-237	3.16013e-235		SPINT2	43.684	0.818845	0	0		BEX1	67.0555	1.05034	0	0		CTD-2314G24.2	29.682	2.95365	1.53492e-164	8.65903e-163		RPL3	14.189	0.550731	1.89049e-37	3.05947e-36		EMC10	21.7491
NAALADL2	43.7067	1.70714	0	0		RPL8	149.61	1.11648	0	0		TMEM123	57.1339	1.05817	0	0		EIF4A1	35.1564	0.918598	2.03255e-237	1.32718e-235		KCNMB2	43.6728	3.25182	0	0		PPP1R16A	67.0326	2.12557	0	0		PFN2	29.3703	1.16228	1.1656e-162	6.52938e-161		DYNLRB1	14.1615	1.19679	3.00495e-37	4.83609e-36		CNNM1	21.7409
ASXL1	43.5339	1.26435	0	0		RPL3	148.785	1.06153	0	0		FRZB	56.9869	3.47872	0	0		QDPR	35.0972	1.17505	1.40407e-236	9.13076e-235		DPP4	43.5458	2.98499	0	0		SCIN	66.5709	4.3905	0	0		CELF4	29.362	1.88192	4.62649e-162	2.57808e-160		TPI1	14.1405	1.04529	3.60382e-37	5.78241e-36		KCNH6	21.6858
PROX1	43.4388	0.92407	0	0		RPS19	146.655	1.15569	0	0		LAMA1	56.9501	2.60287	0	0		NIPSNAP1	34.7991	1.09838	7.62999e-233	4.90192e-231		STMN1	43.1121	0.996144	0	0		PEMT	66.0541	2.32008	0	0		KCTD12	29.3585	2.20171	6.62216e-162	3.68372e-160		ERH	13.9804	1.11472	1.6627e-36	2.6413e-35		EEF1A2	21.2464
GNG5	43.3815	0.649377	0	0		RPS28	146.468	1.38763	0	0		SERINC5	56.7689	1.39835	0	0		CD200	34.7959	1.89997	1.53214e-231	9.76471e-230		TUSC3	43.0457	1.36165	0	0		CRIP2	65.9778	1.88176	0	0		C9orf16	29.3023	1.09791	3.52731e-162	1.969e-160		AK1	13.856	1.82496	5.70855e-36	8.97459e-35		TCEAL3	21.2254
HNRNPU	43.1956	0.762653	0	0		RPL19	146.293	1.05622	0	0		CDK14	56.2374	1.55754	0	0		SYP	34.4857	1.55321	9.40797e-229	5.93669e-227		CBX6	42.8719	1.5535	0	0		ASPH	65.3666	2.04403	0	0		TUSC3	29.2788	1.1851	7.9686e-162	4.425e-160		MGST1	13.643	2.20375	4.30158e-35	6.62244e-34		AK5	21.2116
RP11-161M6.2	43.1674	2.50976	0	0		RPLP0	146.232	1.07388	0	0		IER3	55.7315	1.84801	0	0		RUNX1T1	34.4111	1.80671	3.07899e-227	1.92769e-225		RGS4	42.5586	2.57558	0	0		HEPACAM2	64.9441	1.84007	0	0		SSTR2	29.2588	1.50698	1.07122e-161	5.93819e-160		CIRBP	13.59	0.750351	6.3805e-35	9.78527e-34		SYP	21.1666
TACSTD2	42.9678	1.11625	0	0		RPL7A	145.874	0.998111	0	0		GABRB2	55.6267	2.97916	0	0		PCSK1	34.4053	1.4716	1.95556e-228	1.23158e-226		FFAR1	42.2672	1.95229	0	0		AMN	64.5161	4.59336	0	0		TUBA4A	29.1719	1.51656	1.17825e-160	6.5089e-159		HINT1	13.2556	0.706873	1.42303e-33	2.10357e-32		ASGR1	21.1067
F3	42.8045	1.24348	0	0		RPL10A	145.708	1.17989	0	0		CTGF	55.5074	2.04695	0	0		GAD2	34.3416	1.70404	1.05432e-226	6.56224e-225		RPS6KA3	42.2322	2.1387	0	0		TMEM190	64.2358	2.86385	0	0		BEX4	29.1012	0.99653	2.53973e-160	1.40058e-158		BEX4	13.2247	1.28914	2.05342e-33	3.02565e-32		CRIP2	21.073
SPTBN1	42.8016	0.985012	0	0		FAU	145.413	1.18288	0	0		VIM	55.1947	1.66332	0	0		REV3L	34.3205	1.32316	1.88152e-226	1.16881e-224		RAB26	41.825	2.30313	0	0		MT-ND1	63.9639	0.90967	0	0		APOBEC2	28.9439	3.68978	1.66097e-157	9.00421e-156		RIC3	13.1632	2.04434	3.75899e-33	5.50319e-32		REV3L	20.977
TSPAN6	42.6596	1.00745	0	0		SSR3	144.536	2.0673	0	0		COL27A1	55.1677	1.80725	0	0		H2AFY	34.2521	0.96992	5.78303e-227	3.60649e-225		CAMK2N1	41.7439	1.35647	0	0		TSPAN2	63.8855	2.47239	0	0		CALY	28.8817	2.01772	1.29856e-157	7.05151e-156		PTPRN	12.8703	1.98051	5.52213e-32	7.80875e-31		HOPX	20.8433
SETBP1	42.4614	1.28741	0	0		TKT	143.933	1.97086	0	0		PHGDH	54.8964	1.00596	0	0		KCNK16	34.2377	1.80328	3.09562e-225	1.91557e-223		P4HTM	41.7038	1.6728	0	0		SCG5	63.7742	1.07784	0	0		DYNLT1	28.8274	1.03159	8.43436e-158	4.59572e-156		EEF1A1	12.8488	0.42175	5.33038e-32	7.54094e-31		NCAM1	20.8206
MPV17L	42.4444	1.37346	0	0		RPL30	141.08	1.10792	0	0		CYR61	54.8367	1.59437	0	0		NEUROG3	34.2127	4.5643	2.43234e-223	1.49069e-221		NLRP1	41.3484	1.80604	0	0		SEZ6L2	63.6706	1.36026	0	0		ARPC5	28.8144	1.00471	1.12331e-157	6.11028e-156		ARFGEF3	12.8358	2.15242	7.63877e-32	1.074e-30		CDHR3	20.7958
HNRNPA2B1	41.9073	0.503019	0	0		RPL26	141.006	1.25043	0	0		FGFR3	54.6335	2.10337	0	0		HMGB3	34.0503	1.3164	1.60887e-223	9.87905e-222		SLC22A17	41.2291	2.26236	0	0		RUNX1T1	63.4117	2.34392	0	0		SYP	28.6743	1.62995	6.70908e-156	3.6186e-154		COX17	12.8271	1.35303	7.92504e-32	1.11376e-30		TMEM176B	20.3679
EPHA7	41.793	2.30325	0	0		RPS23	140.214	1.0163	0	0		CALB1	54.5523	3.37794	0	0		SRP14	33.9579	0.556799	3.5059e-224	2.15691e-222		TAGLN3	41	2.28614	0	0		FAM92B	63.1261	3.92441	0	0		RGS2	28.4368	2.32672	4.14513e-153	2.19857e-151		HBG2	12.8221	2.34168	8.53774e-32	1.19881e-30		PLAC9	20.3558
H3F3B	41.7529	0.452374	0	0		RPS7	140.123	0.998009	0	0		ANP32E	53.6471	1.42992	0	0		TSPAN2	33.9377	1.77186	6.53647e-222	3.96033e-220		GNAI1	40.7675	2.22004	7.70776e-308	3.95673e-306		PHACTR2	62.9385	1.63573	0	0		PSIP1	28.3521	1.39284	9.93832e-153	5.26253e-151		LINC01420	12.8016	1.36112	1.01632e-31	1.42517e-30		GPRIN3	20.3044
MAOA	41.7473	1.32717	0	0		CLU	138.826	1.74816	0	0		HES1	53.6165	1.39479	0	0		ZNF428	33.9221	0.950256	4.42072e-223	2.69892e-221		SNRPN	40.5797	0.959749	0	1.50414e-307		CHST9	62.3719	1.57316	0	0		CALM2	28.3346	0.752031	1.39508e-153	7.43655e-152		SNRPN	12.7191	1.06397	2.10751e-31	2.92832e-30		AK1	20.2998
SFPQ	41.6432	0.831506	0	0		EEF1A1	138.448	0.899957	0	0		ANXA3	53.4222	2.96055	0	0		CMIP	33.8994	1.23891	4.55159e-222	2.76824e-220		ANXA6	40.5032	1.94379	2.29128e-305	1.16128e-303		ANXA6	62.0422	2.20914	0	0		FXYD6	28.3331	1.56779	1.14487e-152	6.05228e-151		APLP1	12.7026	1.80083	2.546e-31	3.52838e-30		TMEM65	20.2213
RFTN2	41.5017	2.7405	0	0		AKR7A3	137.717	5.88655	0	0		FGFR2	53.418	2.76183	0	0		BTBD17	33.7921	2.28642	1.59299e-219	9.50734e-218		CALM2	40.1364	0.779276	2.17446e-305	1.10383e-303		RAB3B	61.9879	1.62543	0	0		AK1	28.3032	1.46533	1.98105e-152	1.04554e-150		SKP1	12.6663	0.885432	3.38554e-31	4.67562e-30		PROX1	20.2203
GLUL	41.4242	0.939994	0	0		RPS2	137.398	1.66052	0	0		SUCLG1	53.2159	0.913797	0	0		PAX6	33.7855	1.41008	4.36062e-221	2.63204e-219		FEV	39.9381	3.45388	1.29583e-296	6.42481e-295		MPP6	61.9174	2.30936	0	0		CNIH2	28.2869	1.8156	4.01256e-152	2.11072e-150		ARL3	12.6216	1.31616	5.26088e-31	7.22183e-30		ANK3	20.172
IER2	41.1822	1.00838	0	0		RPS6	136.514	1.14252	0	0		PTPRG	53.139	1.88915	0	0		VASP	33.7481	1.54678	9.90059e-220	5.93107e-218		C12orf75	39.9277	1.43066	1.63978e-299	8.24539e-298		SLC7A8	61.9063	2.00295	0	0		CAMK2B	28.1545	1.88617	7.57746e-151	3.94053e-149		PTPRN2	12.5781	1.91822	8.0099e-31	1.09204e-29		GADD45A	20.1095
AMBP	41.0984	0.94951	0	0		DDOST	135.215	1.98171	0	0		FGFR4	53.0438	1.45455	0	0		CADM2	33.7344	3.33935	4.07068e-218	2.38053e-216		MAP1B	39.8749	1.41021	1.93168e-300	9.72847e-299		C12orf75	61.5994	1.58022	0	0		KCTD8	28.1445	5.18395	4.71724e-150	2.44119e-148		TMEM176B	12.5094	3.18633	1.53771e-30	2.084e-29		GDAP1L1	20.0502
NONO	41.039	0.714583	0	0		EEF1B2	134.715	1.3398	0	0		FSTL1	52.9932	1.90502	0	0		GADD45A	33.5811	1.81901	2.10926e-217	1.22675e-215		PLCXD3	39.8614	1.98289	3.01512e-297	1.50426e-295		ASCL2	61.5277	1.94932	0	0		IFI27L2	27.9146	1.36594	6.68033e-149	3.4238e-147		RPL15	12.4594	0.436307	1.94256e-30	2.62933e-29		TCEAL4	19.9797
MYO10	41.0313	1.06492	0	0		SERP1	134.648	1.99981	0	0		SMC3	52.8388	0.973212	0	0		C9orf16	33.5584	0.99944	8.7921e-219	5.19874e-217		DZIP3	39.7681	1.64375	5.02582e-296	2.48412e-294		CELF4	61.4175	2.28355	0	0		IGFBP5	27.6935	1.60208	6.62199e-147	3.35619e-145		PARK7	12.3946	0.847086	3.97871e-30	5.33558e-29		MAP1B	19.9631
CBX3	40.98	0.837376	0	0		BTG2	134.354	2.48271	0	0		CSPP1	52.8023	1.549	0	0		GDI1	33.4653	1.40479	5.20772e-217	3.02332e-215		NAA20	39.6785	1.35681	2.03736e-295	1.0039e-293		SF3B5	61.3218	1.06306	0	0		TCEAL2	27.5959	1.75064	1.08235e-145	5.46827e-144		HEPACAM2	12.3873	1.67322	4.3614e-30	5.84143e-29		VWA5B2	19.9381
ID1	40.5031	1.38863	0	0		IGFBP2	133.926	3.04462	0	0		GSTM4	52.7825	2.70268	0	0		CEP170	33.3651	1.52307	2.6475e-215	1.52589e-213		DPP7	39.6429	1.62557	2.0953e-294	1.02928e-292		KCNK16	60.7071	2.03873	0	0		DNAJC12	27.5123	1.54441	3.40266e-145	1.71097e-143		SAP18	12.3214	0.920757	7.75808e-30	1.03258e-28		PAM	19.9019
EZR	40.1837	0.810131	0	0		RPLP1	133.641	0.942574	0	0		SPATS2L	52.4956	1.08451	0	0		ISL1	33.2638	1.37165	3.34816e-215	1.92278e-213		PCSK2	39.5048	1.84281	3.31028e-293	1.62361e-291		DNAJC12	60.6006	1.96544	0	0		PRSS12	27.4371	3.26891	7.88178e-144	3.90785e-142		DCTN3	12.3068	1.24623	9.08414e-30	1.20656e-28		ETV1	19.8485
COBL	40.1379	1.39986	0	0		IGF2	133.161	1.66904	0	0		DSC2	52.2392	1.28102	0	0		CBX1	33.2006	1.03299	1.24958e-214	7.12484e-213		AK1	39.3634	1.56005	1.63417e-291	7.97844e-290		MAP1LC3A	60.4599	1.61503	0	0		EMB	27.3598	2.25064	2.17975e-143	1.07572e-141		TPD52	12.299	1.2928	9.5146e-30	1.26163e-28		ATF7IP2	19.7386
WWC2	40.0191	1.52044	0	0		FAM3B	132.888	2.80102	0	0		SMS	52.0216	1.05781	0	0		TERF2IP	33.1953	1.05558	1.87938e-214	1.06777e-212		ANKS1B	39.1272	3.26351	5.88943e-286	2.81933e-284		TMEM37	60.3761	2.02548	0	0		PCLO	27.3386	1.56944	1.54185e-143	7.62096e-142		TMEM59	12.2944	1.03646	1.00048e-29	1.32609e-28		PTMS	19.7211
SF3B1	39.8936	0.727882	0	0		B2M	132.184	1.95399	0	0		TACSTD2	51.8278	1.23856	0	0		YWHAQ	33.1936	0.715759	2.7119e-215	1.5602e-213		IMMP1L	39.101	1.43963	4.20391e-288	2.02766e-286		MAP2	60.1319	2.04142	0	0		NRXN1	27.3146	1.49451	1.48251e-143	7.33898e-142		SPTSSB	12.2903	3.17575	1.10865e-29	1.46558e-28		FSTL5	19.535
KRT19	39.7936	0.82855	0	0		RPS26	132.121	1.38964	0	0		HNF1B	51.7739	2.05932	0	0		NONO	33.0691	0.749393	4.51849e-214	2.55807e-212		C21orf58	39.096	1.90637	2.63852e-287	1.27071e-285		C4orf48	60.0343	1.81109	0	0		TERF2IP	26.8867	1.07176	8.20558e-140	3.95777e-138		SRP14	12.2739	0.659314	1.15994e-29	1.53171e-28		UCHL1	19.5288
S100A10	39.6614	0.855949	0	0		OSTC	131.889	1.66744	0	0		NAP1L1	51.6529	0.6461	0	0		EIF4G2	33.0688	0.662963	2.71787e-214	1.54141e-212		RTN4	39.0805	0.9525	6.24024e-290	3.01895e-288		IAPP	59.4832	5.44941	0	0		RTN4	26.877	0.876555	7.48138e-140	3.61392e-138		CEP126	12.2651	2.0537	1.34689e-29	1.77492e-28		DDX5	19.4585
S100B	39.6485	1.88343	0	0		RPL36AL	131.286	1.37366	0	0		CRABP2	51.6056	3.95124	0	0		GHRL	33.0603	2.50817	1.02568e-211	5.74559e-210		DYNLRB1	38.994	0.973117	1.7514e-288	8.46026e-287		NR3C1	58.9785	2.08898	0	0		SMIM6	26.8434	1.60184	5.47853e-139	2.62657e-137		NAA20	12.2364	1.43496	1.72489e-29	2.26929e-28		PKM	19.4317
PDE7A	39.5798	1.79802	0	0		RPS3A	131.044	1.05025	0	0		PLPP2	51.482	3.66517	0	0		KCNB2	33.0571	2.43212	4.0167e-211	2.24612e-209		GNAI2	38.8898	1.14323	1.63018e-286	7.82001e-285		APLP1	58.7326	1.68923	0	0		RIMS2	26.6862	2.15966	2.27225e-137	1.07486e-135		PYY	12.2332	5.28561	1.87253e-29	2.46151e-28		PTP4A1	19.3378
IGF2BP1	39.4897	1.45403	0	0		RPS27A	130.589	1.0254	0	0		PRSS23	51.3081	1.74678	0	0		HTATSF1	32.9588	1.23038	4.50372e-211	2.51405e-209		RFX6	38.818	2.18809	2.55931e-283	1.21425e-281		SSTR2	58.5446	1.68312	0	0		TPPP3	26.683	1.99046	2.43695e-137	1.15106e-135		GC	12.1774	3.26613	3.04771e-29	3.97036e-28		MAP9	19.3245
KDM5B	39.4321	0.923377	0	0		RPS15A	130.28	1.14515	0	0		PDE3A	51.2445	2.14519	0	0		CALB2	32.9147	3.24711	4.69949e-209	2.6006e-207		SYP	38.6494	1.7486	2.67488e-282	1.26345e-280		EIF4A2	58.5055	0.798043	0	0		FKBP1B	26.6619	1.94149	3.45722e-137	1.62337e-135		CCDC28B	12.1478	1.60068	3.84398e-29	4.98531e-28		NENF	19.2379
CTNND2	39.0695	1.22616	0	0		SSR2	130.058	1.42047	0	0		ADGRG6	51.2241	3.82484	0	0		UCHL1	32.7348	1.27932	1.64452e-209	9.11625e-208		CSTB	38.4971	1.07155	1.66809e-281	7.82117e-280		ARL6IP4	58.3827	0.947623	0	0		P4HTM	26.5989	1.40553	6.71134e-137	3.14674e-135		GPX4	12.0693	1.00811	7.54251e-29	9.69925e-28		AKAP12	19.1685
ZNF608	38.9796	1.13071	0	5.09938e-307		RPL27A	129.972	1.00826	0	0		RND3	51.1317	2.37485	0	0		EMC10	32.7241	1.22981	5.27316e-208	2.90798e-206		TCEAL3	38.1499	1.52598	4.25591e-276	1.98381e-274		EVA1B	58.1059	2.02335	0	0		ARL3	26.5348	1.00366	1.31922e-136	6.15827e-135		TMSB4X	12.0565	0.83753	7.56762e-29	9.72762e-28		ATP5E	19.1388
NFE2L3	38.7289	2.25338	1.6014e-302	8.07786e-301		RPL39	129.359	1.2673	0	0		TPM4	51.1103	1.12345	0	0		CELF3	32.6827	1.93908	1.73841e-207	9.55377e-206		NGFRAP1	38.0512	0.704389	1.74229e-277	8.13325e-276		DMTN	57.769	3.22184	0	0		ALCAM	26.4224	1.6183	3.35534e-135	1.55721e-133		F10	11.9854	2.12538	1.65404e-28	2.10748e-27		KCNH2	19.0932
DDX3X	38.5631	0.82915	1.75098e-303	8.84635e-302		HSPB1	128.851	2.84452	0	0		COL9A2	51.0414	2.20378	0	0		DYNLT1	32.4728	0.900026	8.87827e-207	4.84587e-205		DYNLT1	37.9443	1.06058	5.69361e-275	2.6424e-273		PCLO	57.69	1.86172	0	0		KCNH2	26.3442	2.2716	3.06471e-134	1.40396e-132		EMC10	11.9231	1.24542	2.78973e-28	3.52916e-27		C3orf14	18.9928
IGDCC3	38.4548	2.28392	2.11795e-298	1.05337e-296		SLC39A5	128.46	4.36858	0	0		SOAT1	50.9247	1.88644	0	0		TCAF1	32.2905	1.09545	4.62638e-204	2.49528e-202		HIGD1A	37.7939	1.56986	3.2768e-271	1.50979e-269		MLXIPL	57.5728	2.20419	0	0		PDE4DIP	26.2899	1.49156	3.50051e-134	1.60131e-132		COX7A2L	11.9082	1.0084	3.14542e-28	3.97283e-27		CALM2	18.8307
CYS1	38.4073	1.16048	9.05446e-301	4.53149e-299		MSRB1	128.112	3.37569	0	0		SEMA3C	50.7925	2.37131	0	0		BAALC	32.2354	3.73383	1.83048e-201	9.75749e-200		PYY	37.7727	5.50197	1.15048e-268	5.26289e-267		CDC42EP3	57.5565	1.88289	0	0		DUSP26	26.2446	1.70085	1.16534e-133	5.32322e-132		MIEN1	11.8876	1.40005	3.85708e-28	4.85059e-27		FKBP1B	18.79
RRBP1	38.0935	0.72001	4.36987e-302	2.20079e-300		TMED10	128.036	1.75376	0	0		LEFTY1	50.7877	2.29828	0	0		MEX3A	32.1411	1.54751	1.39567e-201	7.45215e-200		ATP6AP2	37.6917	1.17038	5.96033e-271	2.74227e-269		TSPAN5	57.2698	2.41883	0	0		FXYD3	26.1828	1.48985	2.12335e-133	9.6717e-132		C12orf76	11.8353	1.66996	6.213e-28	7.7766e-27		SCN3A	18.7424
XRN2	37.9779	0.82584	2.81842e-295	1.38663e-293		RPL15	127.755	0.88645	0	0		TGIF1	50.7866	1.55532	0	0		SMARCE1	32.069	0.903347	5.54614e-202	2.9663e-200		SMC2	37.6205	1.8128	2.0683e-268	9.42092e-267		TSC22D3	57.2189	1.86808	0	0		ZKSCAN1	26.1709	0.828147	1.41178e-133	6.43975e-132		ARX	11.7141	2.77671	1.83804e-27	2.26335e-26		TTC3	18.7049
ELF5	37.9412	1.35174	1.88274e-293	9.22022e-292		RPL28	125.957	0.984528	0	0		PLD1	50.7718	2.0964	0	0		RAPGEF5	31.9012	1.87299	1.66495e-198	8.80166e-197		RGS17	37.5978	2.21944	3.49771e-268	1.59091e-266		MRLN	57.1238	3.23641	0	0		COL14A1	26.1281	4.54806	4.69591e-132	2.1178e-130		RAB3B	11.6487	1.45378	3.15941e-27	3.87553e-26		FLRT3	18.6443
KIRREL2	37.8499	1.21052	7.50836e-293	3.66578e-291		KRT18	125.826	1.55586	0	0		WFDC2	50.7323	1.11155	0	0		PTS	31.8399	1.18356	6.01112e-199	3.183e-197		CDKN1C	37.5619	1.46454	1.81317e-268	8.27066e-267		CNTN4	57.03	2.81487	0	0		RXRG	26.0175	4.69744	4.61726e-131	2.05619e-129		ELAVL4	11.6426	1.99539	3.40089e-27	4.16854e-26		TUSC3	18.6407
AFP	37.7545	2.81086	1.0145e-287	4.85652e-286		SERF2	125.698	1.10799	0	0		GLIS3	50.7083	1.43223	0	0		GCH1	31.6097	2.61511	7.08943e-195	3.67476e-193		CRIP2	37.4147	1.49332	2.73866e-267	1.24212e-265		CNTN1	56.4409	3.12323	0	0		PDLIM4	25.9338	1.6048	7.35855e-131	3.25879e-129		SPCS1	11.5993	0.91884	4.75854e-27	5.79261e-26		ST18	18.6252
DKK2	37.6383	3.12259	3.09239e-286	1.47154e-284		RPS3	125.327	0.914752	0	0		OLFML3	50.6953	2.15056	0	0		RAB26	31.5825	1.74881	1.7526e-195	9.09929e-194		EEF1A2	37.2082	1.94298	5.18665e-264	2.32925e-262		PTPRN	56.3326	1.81951	0	0		NPDC1	25.8565	1.44319	1.92192e-130	8.48782e-129		RGS17	11.5629	2.36153	6.91062e-27	8.37723e-26		SLC12A5	18.5816
STIM2	37.5718	1.20654	2.77205e-288	1.329e-286		RPL9	124.863	0.946988	0	0		FILIP1L	50.6725	2.35842	0	0		LIMD2	31.5339	1.58583	7.92791e-195	4.10273e-193		GRIA3	37.0622	4.12693	3.09558e-260	1.36711e-258		DUSP26	56.3288	2.15608	0	0		HMGN2	25.6683	0.637922	2.33629e-129	1.0261e-127		DNAJC12	11.5146	1.7264	1.03222e-26	1.24279e-25		COL9A2	18.5527
RELN	37.5455	2.07973	8.15591e-286	3.86951e-284		TMEM258	124.86	1.56366	0	0		AMOTL2	50.5127	2.12857	0	0		AK1	31.5292	1.25082	1.6218e-195	8.43388e-194		CADPS	37.0107	1.15987	2.30172e-263	1.02789e-261		MT-ND2	56.2836	0.74021	0	0		C12orf57	25.6511	0.860459	8.25528e-129	3.60097e-127		SUMO2	11.4716	0.743824	1.43406e-26	1.72206e-25		TMEM74B	18.5437
TET1	37.2912	1.23754	4.91772e-284	2.30577e-282		RPS24	124.197	0.971555	0	0		DSG2	50.3255	1.20919	0	0		H2AFY2	31.422	1.1637	3.82968e-194	1.97547e-192		S100A6	36.9551	1.14182	2.16549e-263	9.69761e-262		TUBA4A	56.0761	1.69358	0	0		TCEAL5	25.6179	2.38991	7.77896e-128	3.36106e-126		MOCS2	11.4697	1.76418	1.54269e-26	1.85042e-25		CALD1	18.5262
YAP1	37.1736	1.54915	4.47738e-282	2.09316e-280		SERPINA4	123.941	3.22738	0	0		SEMA6A	50.251	1.63293	0	0		ABCA5	31.279	1.25116	1.89332e-192	9.6881e-191		KIAA1324	36.8118	1.84857	5.6948e-259	2.50462e-257		RGS9	55.6944	2.35977	0	0		GNAI1	25.536	1.77069	2.46566e-127	1.06246e-125		THSD7A	11.4447	4.32167	1.97472e-26	2.35712e-25		FFAR4	18.4635
HNRNPD	37.1706	0.734229	2.81003e-284	1.32337e-282		RPL36	122.634	1.21763	0	0		MARCKSL1	50.22	1.05106	0	0		KIDINS220	31.2118	1.03428	3.96906e-192	2.02447e-190		GCLM	36.6726	1.90875	7.86968e-257	3.45638e-255		HEBP2	55.527	1.37305	0	0		CRMP1	25.5047	1.69837	3.65246e-127	1.56962e-125		PCP4	11.3389	1.96959	4.75173e-26	5.58215e-25		LINC00936	18.4523
HNRNPDL	37.0911	0.520873	3.18962e-284	1.49992e-282		RPL37	120.981	1.18119	0	0		ADAMTS16	50.1266	3.13918	0	0		PGAM2	31.1404	2.19217	3.24876e-190	1.63875e-188		CACNA1A	36.654	2.19225	1.52227e-256	6.65836e-255		CCSER1	55.4495	2.99067	0	0		CCDC28B	25.4964	1.18525	2.66515e-127	1.14688e-125		SELT	11.3183	1.26267	5.63105e-26	6.60542e-25		IL1RAP	18.3809
KIAA1217	36.9818	1.28201	7.30929e-280	3.37262e-278		RPS15	119.968	0.962981	0	0		SPEF2	50.0747	1.99117	0	0		UCP2	31.0186	1.4208	1.42559e-189	7.16837e-188		LINC00643	36.5982	1.89281	1.43864e-256	6.30119e-255		EMB	54.9036	2.83239	0	0		DPP7	25.4808	1.35356	5.54128e-127	2.37813e-125		DUSP26	11.2795	1.96849	8.02474e-26	9.36171e-25		RIMBP2	18.3351
FSTL1	36.9644	1.42886	3.00477e-279	1.38245e-277		RPS29	119.327	1.32997	0	0		IFITM2	50.071	2.4511	0	0		PPP1CB	30.7722	0.90028	1.17166e-187	5.81822e-186		SEZ6L	36.3161	3.60474	2.2725e-251	9.72669e-250		FFAR4	54.6459	3.69688	0	0		SLC7A2	25.4232	1.22406	1.2817e-126	5.48587e-125		UFC1	11.2251	1.01128	1.25055e-25	1.44831e-24		VPS13A	18.2611
ITPR2	36.9501	1.16642	7.09211e-280	3.27715e-278		GCAT	119.126	3.60838	0	0		LURAP1L	50.0233	2.11694	0	0		FOXA2	30.723	1.09369	1.2061e-186	5.95222e-185		KCNH6	36.1332	2.81306	1.36256e-249	5.80089e-248		TUNAR	54.4027	2.98551	0	0		SPTSSB	25.4142	2.64186	4.96522e-126	2.11104e-124		PFDN5	11.2046	0.555511	1.41315e-25	1.6313e-24		MALAT1	18.2464
ANP32E	36.8697	1.038	4.76479e-279	2.18906e-277		FBXO2	118.823	4.42826	0	0		ENC1	49.8352	1.9854	0	0		NBEA	30.5787	1.43361	1.32554e-184	6.47162e-183		GADD45G	36.0634	2.43163	4.79567e-249	2.03625e-247		LINC00643	54.336	2.11983	0	0		CADM1	25.3767	1.06454	2.60135e-126	1.10748e-124		PTS	11.1773	1.44657	1.91031e-25	2.19161e-24		COX17	18.1695
STARD13	36.8274	1.40312	2.21126e-277	1.00721e-275		CXCL12	118.596	3.55416	0	0		KCNQ1OT1	49.2468	0.900141	0	0		FEV	30.449	3.64735	4.24991e-182	2.04367e-180		CAPZB	36.0228	1.09205	1.99208e-250	8.50364e-249		SLC4A8	54.3237	2.83183	0	0		CALM1	25.2988	0.558422	2.39539e-126	1.02116e-124		STX1A	11.1242	1.84885	3.0358e-25	3.45942e-24		CNIH2	18.1675
SEMA3C	36.3802	1.79376	2.81831e-270	1.24638e-268		ATF3	117.533	2.96979	0	0		DDAH2	48.9345	1.01154	0	0		FAM60A	30.4374	0.867726	5.47562e-184	2.65709e-182		NENF	35.9259	1.30829	1.03641e-248	4.38314e-247		MAP4K2	53.7568	3.25089	0	0		GDI1	25.275	1.37408	2.85384e-125	1.20693e-123		ATP6V0E1	11.1201	0.945945	3.05714e-25	3.4825e-24		METRN	18.1434
NPAS2	36.2656	1.74962	6.5011e-269	2.84747e-267		FTL	117.19	1.15768	0	0		COL2A1	48.4687	1.68362	0	0		PRMT1	30.4354	0.708168	2.58029e-184	1.25784e-182		PTS	35.8525	1.3456	5.49206e-248	2.3196e-246		NOL4	53.5504	1.94311	0	0		TCEAL4	25.2532	0.824165	2.12927e-125	9.02891e-124		C21orf58	11.1103	1.88739	3.43841e-25	3.90567e-24		ICA1L	18.1228
SERPING1	36.1099	1.44656	5.88105e-267	2.55834e-265		RPL6	117.181	0.838337	0	0		PDGFD	48.4578	2.00372	0	0		TBCC	30.3331	1.23659	2.6317e-182	1.27319e-180		MIEN1	35.7409	1.2213	7.38268e-247	3.09762e-245		TERF2IP	53.4897	1.14606	0	0		HOPX	25.1965	2.55174	3.36598e-124	1.41415e-122		TBCB	11.0963	1.35698	3.82601e-25	4.33823e-24		BAMBI	18.0943
RAB34	36.0989	1.15639	9.94247e-268	4.33693e-266		UBA52	116.637	1.01014	0	0		TMPO	48.3761	1.27862	0	0		DYNC1H1	30.2584	0.969146	7.14046e-182	3.42849e-180		PCP4	35.7019	1.83428	3.27977e-246	1.37432e-244		GPD1	53.3991	3.48597	0	0		EIF4A2	25.0762	0.619488	4.29758e-124	1.80318e-122		HMGN2	11.0451	0.800024	5.77021e-25	6.49429e-24		SYT10	18.0707
NAP1L1	36.0783	0.493025	2.51752e-270	1.1149e-268		ITM2A	116.55	4.3787	0	0		SOX4	48.3056	0.832894	0	0		PTMS	30.2012	0.959728	2.56171e-181	1.21901e-179		BAIAP3	35.6773	2.29679	1.45011e-244	6.06049e-243		CNIH2	53.3213	1.86714	0	0		DYNLRB1	25.0104	0.811947	2.57727e-123	1.07572e-121		RPL8	10.9877	0.380957	8.27758e-25	9.25432e-24		PDE4DIP	17.9997
GYPC	35.9021	1.40941	1.7936e-264	7.76011e-263		IMPA2	115.782	2.62741	0	0		REST	48.1198	1.28401	0	0		HNRNPA0	30.13	0.720493	5.42647e-181	2.57838e-179		MYL6	35.6193	0.552822	1.44125e-247	6.07114e-246		PLPPR5	53.3057	2.5119	0	0		SLC12A5	24.9903	2.52682	2.31306e-122	9.55447e-121		LAMTOR5	10.9785	0.981175	1.02892e-24	1.14637e-23		RAB26	17.9572
YBX3	35.8464	0.792182	7.74283e-267	3.36365e-265		FCGRT	114.74	1.67502	0	0		SVIL	48.077	1.50232	0	0		GPC2	30.0664	3.30533	3.70437e-178	1.73178e-176		EID1	35.5254	0.653463	3.40324e-246	1.42419e-244		TSPAN1	53.1981	2.84477	0	0		LINC01370	24.9534	4.65543	7.13552e-122	2.93983e-120		DYNLL1	10.9641	0.719929	1.14863e-24	1.27701e-23		KCNJ3	17.914
ENAH	35.8118	0.96948	4.38396e-264	1.88907e-262		LGALS2	114.712	4.20182	0	0		KIAA1551	47.9436	1.44494	0	0		TTLL7	30.0102	1.29444	7.80096e-179	3.68468e-177		TPPP3	35.5143	1.91031	3.82872e-243	1.58974e-241		GNAI2	53.1146	1.11118	0	0		BAMBI	24.9106	2.63119	1.13005e-121	4.63787e-120		IFI27L2	10.8916	1.47807	2.19722e-24	2.41838e-23		LRRFIP1	17.9115
COL4A5	35.6234	1.85105	7.90123e-260	3.34154e-258		SLC25A5	114.454	1.42876	0	0		TMEM98	47.9164	1.20837	0	0		SCG2	30.0048	1.49467	8.16623e-179	3.84584e-177		PIN1	35.429	1.07175	1.97474e-243	8.22078e-242		ARPC5	53.1146	1.0347	0	0		ST18	24.8802	1.95894	1.28511e-121	5.26747e-120		TCEAL4	10.888	0.983432	2.22672e-24	2.44916e-23		EFNB3	17.8835
GALNT2	35.4921	1.00008	2.15527e-260	9.13916e-259		RPS25	112.805	0.964819	0	0		MAP3K1	47.7633	1.71477	0	0		MLXIPL	29.9945	1.55898	1.68507e-178	7.90078e-177		IFI27L2	35.2033	1.3587	4.2113e-240	1.74406e-238		CALY	53.0262	2.16339	0	0		PIN1	24.8551	0.961517	7.58261e-122	3.12001e-120		ANXA6	10.8646	1.86277	2.78571e-24	3.05138e-23		C11orf87	17.8783
NHSL1	35.4822	1.59091	2.29183e-258	9.62869e-257		FKBP2	112.678	1.35489	0	0		SAT2	47.7452	0.891803	0	0		RFX3	29.9927	1.6856	3.96837e-178	1.85249e-176		SCAMP1	35.1634	1.47763	2.71784e-239	1.12265e-237		GAD2	52.9407	1.83112	0	0		NAV1	24.7302	1.65055	2.34338e-120	9.49543e-119		CSTF3	10.8579	1.61337	2.93698e-24	3.21157e-23		RFX6	17.8357
APEX1	35.4615	0.635623	6.2039e-261	2.63769e-259		HERPUD1	112.601	1.97192	0	0		ATP12A	47.6313	3.59619	0	0		GNG2	29.9831	1.78451	4.06489e-178	1.89477e-176		GAD2	35.0483	1.59787	1.61775e-238	6.63941e-237		UCN3	52.9185	3.34926	0	0		PTPRN2	24.3941	1.35392	1.05092e-117	4.18401e-116		TPPP3	10.8504	1.98289	3.14526e-24	3.43579e-23		DIRAS2	17.7474
XRCC5	35.1218	0.567595	3.07949e-256	1.28198e-254		RPSA	112.412	0.882852	0	0		KCNJ16	47.0886	2.37587	0	0		ACTB	29.9147	0.499346	5.97461e-179	2.82621e-177		IRX1	34.9129	7.52951	2.9329e-234	1.18842e-232		KIF1A	52.8695	1.56511	0	0		EEF1A2	24.3616	1.70227	2.66953e-117	1.0615e-115		ARL2	10.7522	1.05813	7.05678e-24	7.61484e-23		GDI1	17.634
TIA1	35.0453	0.88164	7.1975e-254	2.96537e-252		TCEA3	112.212	2.14851	0	0		S100A13	46.9074	1.26576	0	0		ATP6V1G1	29.8729	0.602738	1.09365e-178	5.14288e-177		PTMS	34.4733	1.01495	1.60596e-232	6.45011e-231		RAB29	52.7645	2.45914	0	0		FOXO1	24.3311	1.65483	5.50462e-117	2.18339e-115		SH3BGRL	10.7406	1.18455	7.82245e-24	8.42966e-23		CRY2	17.5394
MGAT5	35.0367	1.41548	1.27942e-252	5.23071e-251		SERPINB6	112.093	1.96855	0	0		SOD3	46.6437	2.36449	0	0		DACH1	29.8219	1.76063	2.13992e-176	9.90256e-175		TSPAN7	34.4254	1.46264	1.3458e-230	5.36471e-229		SLC29A4	52.7123	1.79369	0	0		RUNX1T1	24.2948	1.52857	7.61624e-117	3.01346e-115		SSR4	10.7214	0.560285	7.64199e-24	8.24076e-23		DGKH	17.5242
C5	35.0047	1.2202	5.82123e-253	2.3891e-251		NACA	111.357	0.871937	0	0		NASP	46.594	0.980993	0	0		TOX	29.4726	2.22216	2.07155e-172	9.4223e-171		CYSTM1	34.343	1.10426	2.271e-230	9.03025e-229		PSD3	52.3687	2.24329	0	0		GABARAPL2	24.2546	0.783262	8.17827e-117	3.23183e-115		B2M	10.6966	1.08116	1.11619e-23	1.19718e-22		TMEM176A	17.4991
SPATS2L	34.8474	0.789862	4.81896e-252	1.96764e-250		RPL41	110.861	1.14587	0	0		LAMB1	46.5074	1.33728	0	0		BRD3	29.3275	1.05076	9.00499e-172	4.08422e-170		PCLO	34.0189	1.55574	9.03129e-226	3.52961e-224		NKX2-2	52.1916	1.84286	0	0		UCP2	24.1325	1.40854	1.98151e-115	7.77267e-114		PRDX5	10.6845	0.800649	1.21573e-23	1.30044e-22		IL20RA	17.4836
FN1	34.5532	1.87191	5.33661e-245	2.1115e-243		YBX3	110.718	2.12923	0	0		BRCA1	46.2166	2.66391	0	0		MFNG	29.3051	3.12452	2.98489e-170	1.34425e-168		TSPAN2	33.9945	1.75384	2.20874e-225	8.61113e-224		FAM105A	52.1591	2.00199	0	0		RTN1	24.112	1.81164	3.99224e-115	1.56025e-113		ATP6V1F	10.646	1.01145	1.71801e-23	1.82976e-22		FRMD4B	17.4353
ACIN1	34.5352	0.831685	3.53939e-247	1.41266e-245		P2RX1	110.325	4.22773	0	0		RAB34	46.2128	1.32132	0	0		FGF14	29.2277	2.13953	6.70587e-170	3.00728e-168		GDI1	33.979	1.45626	1.92821e-225	7.52662e-224		AP3B1	51.9294	1.67751	0	0		PTS	24.0309	1.13551	1.04094e-114	4.05333e-113		LINC00998	10.6368	1.2468	1.86767e-23	1.98518e-22		RAPGEF4	17.4066
TCF7L2	34.4974	1.0647	3.31576e-246	1.3201e-244		RPS27	110.201	1.14168	0	0		LITAF	46.1089	2.21146	0	0		CCT6A	29.1539	0.72715	1.51197e-170	6.82844e-169		DSP	33.9732	0.933327	1.70902e-226	6.70379e-225		BASP1	51.7986	1.85383	0	0		NME3	23.9692	0.98067	3.13466e-114	1.21616e-112		HSBP1	10.6119	0.873562	2.27327e-23	2.40748e-22		SEC11C	17.3318
KDM1A	34.3855	0.921388	7.17483e-245	2.8353e-243		SEC61B	110.091	1.18291	0	0		PHYHIPL	45.9115	1.26465	0	0		TMEM196	29.1309	1.60913	2.67706e-169	1.19217e-167		RAB3C	33.7773	1.84992	1.62778e-222	6.28478e-221		AKT1	51.7769	1.55953	0	0		DST	23.8715	1.13366	2.66663e-113	1.02585e-111		MAGEH1	10.5775	1.44535	3.08127e-23	3.2481e-22		TTLL7	17.3109
WDR72	34.3792	2.45167	1.78344e-242	6.98715e-241		RNASET2	109.642	2.50467	0	0		ZFP36L1	45.6791	0.960197	0	0		PIN1	29.0685	0.871098	2.164e-169	9.67737e-168		TCEAL4	33.6904	0.840857	3.37143e-223	1.30643e-221		BEX2	51.7461	0.97462	0	0		IDS	23.8251	1.36169	7.25602e-113	2.78467e-111		GNG4	10.5303	1.9658	4.61647e-23	4.83292e-22		BEX4	17.3107
CCNL2	34.3088	0.927563	9.98561e-244	3.9363e-242		RPL23A	108.914	0.943737	0	0		NEDD4L	45.5879	1.21501	0	0		AKT3	29.0596	1.7297	2.94306e-168	1.29616e-166		ATP2B1	33.5725	0.989236	2.44964e-221	9.3898e-220		CACNA2D1	51.3571	1.91582	0	0		NAA20	23.7134	1.03392	5.30406e-112	2.01378e-110		TSPAN7	10.5217	1.57165	4.93711e-23	5.15507e-22		CSRNP3	17.2755
TGFB2	34.2162	1.42586	6.53971e-242	2.55272e-240		IFRD1	108.756	2.4587	0	0		GNG5	45.5187	0.631203	0	0		CSDE1	29.0223	0.646263	2.42426e-169	1.0811e-167		NDUFB2	33.528	0.742177	2.0457e-221	7.85085e-220		PTPRE	51.3411	4.98743	0	0		DACH1	23.6475	1.75671	3.0784e-111	1.16324e-109		C3orf14	10.5217	1.39821	4.89293e-23	5.1106e-22		PGM5P2	17.274
DSG2	34.1096	0.898303	1.56702e-241	6.07958e-240		RPL13A	108.337	0.853634	0	0		NBPF14	45.4401	2.6881	0	0		SSBP3	28.9732	1.31532	9.33999e-168	4.09651e-166		MYL6B	33.3356	0.964384	1.354e-218	5.15293e-217		SSBP4	51.3178	1.33627	0	0		AKAP12	23.6168	2.62269	9.07674e-111	3.42173e-109		CAPZA2	10.5125	1.16125	5.29349e-23	5.52357e-22		CACNA2D1	17.2474
KHDRBS1	34.0135	0.692594	1.42406e-240	5.50486e-239		MGST1	108.333	3.44623	0	0		YAP1	45.4275	1.8072	0	0		BEX1	28.9604	0.710052	4.93712e-169	2.18341e-167		PKM	33.2294	0.863364	4.85907e-218	1.84483e-216		TTC3	51.0856	0.838455	0	0		KIAA1324	23.517	1.48061	2.82392e-110	1.05831e-108		COX7A2	10.4748	0.822825	7.09527e-23	7.36754e-22		C10orf10	17.2333
MAGI1	33.9033	1.01112	1.77643e-238	6.85042e-237		JUNB	108.224	2.29006	0	0		ERBB2	45.4103	2.09167	0	0		TPM1	28.888	0.750551	2.58394e-168	1.13958e-166		GNG2	33.2033	1.95818	7.72612e-216	2.91257e-214		HMGCLL1	50.9926	3.06865	0	0		PLPPR5	23.4969	1.87506	5.93453e-110	2.21366e-108		GNAI1	10.4522	1.93387	8.85133e-23	9.15823e-22		TM4SF4	17.1516
CHD3	33.8019	1.01433	6.13787e-237	2.34991e-235		BNIP3	108.013	1.89657	0	0		ARL4C	45.0544	1.71326	0	0		KIF3A	28.734	1.1485	1.44968e-165	6.24674e-164		UCP2	33.1668	1.50818	7.11563e-216	2.6856e-214		RIIAD1	50.8689	3.13433	0	0		TTC3	23.4639	0.716651	3.73347e-110	1.3959e-108		USH1C	10.4417	2.0575	9.6789e-23	1.00015e-21		NOVA1	17.1111
PXDN	33.8	1.29028	2.56261e-236	9.79931e-235		SCG5	107.928	2.41491	0	0		MCM3	44.9565	1.77293	0	0		ATP2B4	28.7101	1.54296	8.64537e-165	3.6954e-163		RHBDD2	33.0984	1.34059	3.0583e-215	1.14884e-213		SURF4	50.8368	1.2235	0	0		ANXA7	23.4421	1.04473	9.37402e-110	3.48849e-108		RHOA	10.4227	0.938559	1.10601e-22	1.13956e-21		TCEAL5	17.0951
LAPTM4B	33.7014	0.817763	3.19314e-236	1.21812e-234		RPL7	107.761	1.04979	0	0		TACC1	44.8706	1.50156	0	0		FMNL2	28.6989	1.67962	1.65595e-164	7.04053e-163		IDS	33.091	1.47423	4.56012e-215	1.71098e-213		DCX	50.8218	1.86915	0	0		KCNJ6	23.4133	1.53485	2.06949e-109	7.68357e-108		LINC00643	10.4131	1.94437	1.22172e-22	1.25594e-21		GNAO1	17.0922
SEPT2	33.6025	0.567964	1.75581e-235	6.68212e-234		RNF186	107.659	4.32696	0	0		STAT1	44.8449	1.53936	0	0		POU2F2	28.623	3.68236	3.85381e-163	1.61911e-161		CAMK2B	33.0061	1.78751	9.26668e-214	3.45257e-212		KCNJ6	50.6745	1.89556	0	0		PTMS	23.2904	0.957045	1.43282e-108	5.2768e-107		IER3IP1	10.3639	1.31537	1.81902e-22	1.8586e-21		PCBP4	17.0197
SDC4	33.5616	1.28717	2.12226e-233	8.03842e-232		DNAJB4	107.236	2.86121	0	0		LA16c-380H5.3	44.7451	2.76332	0	0		CRYBA2	28.6102	1.5	4.00987e-164	1.70033e-162		ARL3	32.9792	0.974031	1.96143e-214	7.34212e-213		MAGEH1	50.6088	1.47592	0	0		PCSK1	23.2798	1.24249	1.39321e-108	5.13685e-107		CAPSL	10.3521	2.83136	2.0473e-22	2.08718e-21		CHGA	16.9886
EIF2S3	33.4259	0.763664	8.24535e-233	3.11199e-231		RPL24	107.105	0.797782	0	0		COL4A2	44.4465	1.96217	0	0		MRPL42	28.5897	0.944753	2.8923e-164	1.22808e-162		ATP6V0E2	32.9047	1.49745	8.41946e-213	3.12961e-211		CDKN1C	50.2554	1.07174	0	0		OCIAD2	23.1415	0.812693	1.84447e-107	6.75388e-106		KCNMB2	10.3302	2.59016	2.44568e-22	2.4838e-21		GCNT2	16.9785
PRPSAP1	33.4113	1.07182	1.16763e-231	4.39133e-230		HSPA1A	106.334	2.84252	0	0		LBR	44.4348	1.23992	0	0		ROCK1	28.5187	0.854343	1.32359e-163	5.59026e-162		ABCC8	32.7782	1.47874	1.21807e-211	4.51196e-210		HECTD4	50.246	1.65615	0	0		RIPPLY3	23.0979	4.22191	2.24955e-106	8.13455e-105		RPL7	10.3242	0.464997	2.24918e-22	2.2886e-21		GABARAPL2	16.8785
INADL	33.3731	0.965768	1.87559e-231	7.04559e-230		RPL22	106.039	0.922724	0	0		TMSB4X	44.4245	0.861944	0	0		KLK12	28.4197	6.09334	6.68026e-161	2.74165e-159		FRMD4B	32.6918	1.63464	4.41696e-210	1.62294e-208		SAMD11	49.8912	4.59488	0	0		PRMT2	23.0861	1.01497	8.37829e-107	3.04344e-105		AP2S1	10.3181	0.979154	2.62279e-22	2.65944e-21		APOH	16.823
CNP	33.3009	1.06569	3.47683e-230	1.29539e-228		RPL35A	105.496	0.866339	0	0		PPARGC1A	44.1714	3.88616	0	0		APEX1	28.4165	0.722606	8.96821e-163	3.75794e-161		GPC6	32.5693	2.15774	2.96915e-208	1.07611e-206		BTBD17	49.7124	2.40101	0	0		MYL6B	23.0554	0.840566	1.09569e-106	3.97109e-105		ATP6V0E2	10.3013	1.67469	3.06704e-22	3.10202e-21		PIN1	16.8059
DICER1	33.2661	0.766136	1.75219e-230	6.54356e-229		PABPC4	105.297	1.83518	0	0		COL4A1	44.0661	2.46264	0	0		SIM1	28.3247	1.28817	5.44676e-161	2.24117e-159		ST18	32.5006	2.06138	1.25491e-207	4.53272e-206		RASA4	49.3983	2.27034	0	0		MEIS2	23.0207	0.794612	9.65491e-107	3.5032e-105		TMEM176A	10.2589	2.95764	4.4107e-22	4.43431e-21		NGFRAP1	16.8038
FBXO21	33.1255	0.798807	1.39087e-228	5.15203e-227		RPS16	104.381	0.792312	0	0		GLUL	44.0479	0.913845	0	0		GNAO1	28.3232	1.80569	8.80783e-161	3.61019e-159		HEPACAM2	32.4262	1.29714	2.09697e-208	7.62601e-207		FOXP2	49.3964	2.98827	0	0		ATP5L	23.0165	0.574144	1.66045e-106	6.01114e-105		WRB	10.248	1.46663	4.72747e-22	4.74232e-21		PTPRT	16.7651
FBLN5	33.0855	1.8154	2.04212e-226	7.4862e-225		HSPA1B	103.832	2.29837	0	0		FUS	43.9129	0.619392	0	0		ZNF326	28.3011	0.932228	4.70542e-161	1.94114e-159		NME3	32.3562	1.04005	4.4366e-207	1.59888e-205		CCDC109B	48.9726	3.62819	0	0		FAM105A	22.9247	1.50709	2.49242e-105	8.96206e-104		CLU	10.2393	0.719063	4.74626e-22	4.75967e-21		SYT4	16.7272
NEDD4L	32.9162	0.957761	1.37264e-225	5.01468e-224		UBB	103.831	1.05725	0	0		HMGA1	43.7191	1.08774	0	0		MARCH8	28.1194	1.58207	9.73871e-159	3.94616e-157		RUNX1T1	32.3374	1.67412	3.00612e-206	1.08092e-204		TMEM5	48.9607	1.67663	0	0		PIPOX	22.905	2.29024	5.76833e-105	2.05791e-103		RPS4X	10.2291	0.334239	4.63345e-22	4.65239e-21		ATP6V0B	16.5777
TPD52L1	32.8247	1.03694	3.18624e-224	1.15741e-222		SERPINF1	103.716	3.40019	0	0		CENPF	43.6755	3.09576	0	0		RAB3B	28.113	1.14879	5.62468e-159	2.28494e-157		SDC2	32.1174	1.22739	5.3874e-204	1.91559e-202		TUSC3	48.8872	1.0919	0	0		KCNJ8	22.901	2.08793	5.11233e-105	1.83001e-103		PHPT1	10.2175	0.744183	5.90633e-22	5.90448e-21		PPL	16.5438
CKB	32.7887	0.611214	5.35046e-225	1.95023e-223		TMED9	103.622	1.55007	0	0		SHANK2	43.6057	2.08422	0	0		ID4	28.06	1.09631	1.66135e-158	6.7148e-157		SEC11C	32.0605	0.65675	3.48623e-206	1.25214e-204		ST6GALNAC5	48.7964	2.5195	0	0		DCX	22.8989	1.48109	3.95728e-105	1.41814e-103		PLP2	10.1725	1.06605	8.63467e-22	8.5836e-21		RP11-382A20.3	16.5111
ANXA4	32.7257	0.721579	1.43344e-224	5.21294e-223		RPN2	103.461	1.67092	0	0		TMSB15A	43.6042	2.20424	0	0		RBM3	28.0545	0.764506	6.50907e-159	2.64085e-157		MLXIPL	32.0041	1.67156	1.88296e-202	6.67291e-201		TMPRSS6	48.6053	3.00666	0	0		F10	22.852	1.51499	8.78842e-105	3.12837e-103		TIMM17B	10.1668	1.18731	9.15129e-22	9.0802e-21		SNRPN	16.4437
PBX1	32.6503	0.67776	6.72957e-223	2.43347e-221		VAMP8	103.096	1.97453	0	0		ACSS1	43.4677	1.94061	0	0		CSNK1E	28.0318	1.0698	3.05084e-158	1.22841e-156		DUSP26	31.9462	1.63043	7.37674e-202	2.60552e-200		PPP1R14C	48.5605	3.06558	0	0		SARAF	22.7198	0.722648	5.7758e-104	2.04685e-102		PNMT	10.1648	4.02074	9.58178e-22	9.49849e-21		FAM46A	16.4411
HEXIM1	32.5432	1.12779	2.10758e-220	7.55275e-219		HSPA5	101.73	1.23131	0	0		PROX1	43.4561	0.841282	0	0		TUBB3	27.9894	3.5102	9.34521e-157	3.71597e-155		GABARAPL2	31.7815	0.799158	4.62936e-201	1.63152e-199		SEC11C	48.4983	0.720765	0	0		PLAC8	22.7143	3.22655	2.65312e-103	9.32975e-102		MYL6B	10.148	1.06441	1.06227e-21	1.05043e-20		DOCK8	16.3947
ANKRD13A	32.4637	1.32379	3.82522e-219	1.36013e-217		HSP90B1	101.05	1.07547	0	0		RP11-416N2.4	43.4557	1.87234	0	0		BAZ2B	27.9512	0.804988	8.23726e-158	3.30422e-156		BEX4	31.5726	0.8601	1.71541e-198	5.99923e-197		PTPRN2	48.4253	1.50435	0	0		DCTN3	22.658	0.821761	2.11811e-103	7.45657e-102		CYSTM1	10.1445	1.08059	1.08482e-21	1.07239e-20		TMEM86B	16.2571
SERPINF2	32.4512	1.38463	6.94765e-219	2.46761e-217		TM4SF4	100.743	2.09859	0	0		CFI	43.3402	1.21466	0	0		SSTR1	27.9002	2.07513	3.02995e-156	1.20182e-154		C3orf14	31.4201	1.21479	1.99284e-196	6.93153e-195		SNAP25	48.0257	1.90326	0	0		TMEM61	22.6341	1.97309	7.63908e-103	2.67452e-101		GPC6	10.0889	2.2303	1.75623e-21	1.72915e-20		LEPR	16.2565
COL18A1	32.442	1.00126	3.89244e-220	1.39178e-218		BCAM	100.628	1.6202	0	0		PRC1	43.2629	2.15191	0	0		DYNC1I2	27.841	0.793695	9.21206e-157	3.66759e-155		C1orf122	31.3509	1.04965	1.20446e-195	4.16668e-194		TMEM53	47.9599	2.14358	0	0		NLRP1	22.5806	1.23504	9.43191e-103	3.29859e-101		IMMP1L	10.0678	1.31573	2.05217e-21	2.01309e-20		TUBA4A	16.2202
EXT1	32.3627	1.21478	4.96626e-218	1.75218e-216		RPLP2	100.596	0.850573	0	0		TMEM261	43.2006	0.912714	0	0		ATP6V0B	27.6886	0.695276	2.17731e-155	8.60415e-154		RAB3B	31.3208	1.15883	2.09957e-195	7.24749e-194		POLR2I	47.948	0.982849	0	0		ICA1L	22.4666	1.7257	1.61878e-101	5.61213e-100		CBX6	10.0294	1.33885	2.80393e-21	2.73205e-20		BTG3	16.1972
SPATA13	32.3535	1.00281	2.33974e-218	8.28249e-217		CD151	99.791	1.50754	0	0		QKI	42.8282	1.20464	0	0		ACTG1	27.3406	0.370076	1.93067e-152	7.51784e-151		UQCR11	31.3192	0.791699	1.14322e-195	3.95911e-194		PEPD	47.8081	1.5456	0	0		PHGR1	22.4178	2.89013	5.45768e-101	1.88393e-99		OAZ2	10.0121	1.16922	3.20904e-21	3.12012e-20		TAC3	16.114
CBX5	32.2134	0.581726	1.70257e-217	5.98054e-216		MYDGF	98.9152	1.64802	0	0		RP11-277P12.20	42.6018	3.30263	0	0		CTXN1	27.3311	1.70252	1.13411e-150	4.36818e-149		A1CF	31.3119	1.44186	9.84173e-195	3.38628e-193		NKX6-1	47.7785	1.6179	0	0		LSAMP	22.3294	3.14486	3.23517e-100	1.10362e-98		RPS27A	10.0081	0.359806	2.93121e-21	2.85346e-20		RFX3	16.1138
PAXBP1	32.2131	1.02699	2.75557e-216	9.63695e-215		EIF4EBP1	98.8198	1.8839	0	0		WWC2	42.4797	1.48042	0	0		ATP2B1	27.2278	0.822186	2.43084e-150	9.3514e-149		HAGH	31.1197	1.47756	1.68911e-192	5.76827e-191		KIF21A	47.6262	1.31304	0	0		SNAP25	22.3232	1.56152	1.97708e-100	6.78069e-99		COPZ1	9.98919	0.997044	3.85129e-21	3.72641e-20		SEZ6L	16.1123
TUBB	32.0839	0.591244	1.41394e-216	4.95578e-215		CD99	97.663	1.37473	0	0		NRTN	42.4284	2.26704	0	0		MAPRE3	27.161	1.45284	2.83596e-149	1.08706e-147		EIF4A2	31.0656	0.611168	2.64002e-193	9.04462e-192		RHBDD2	47.5744	1.37272	0	0		VWA5B2	22.309	1.65049	2.68263e-100	9.17093e-99		C12orf75	9.9745	1.21507	4.31988e-21	4.16844e-20		NPHP4	16.1
ID3	32.0318	0.983822	6.00551e-215	2.09112e-213		RPS13	97.4932	0.75412	0	0		AC013461.1	42.3968	1.66293	0	0		PHC2	27.0551	1.17078	3.57278e-148	1.3597e-146		ATP6V1G1	30.7047	0.641309	2.54741e-189	8.55299e-188		SCGB2A1	47.5025	2.99434	0	0		H2AFY	22.2846	0.862744	2.42714e-100	8.31529e-99		DPY30	9.9548	1.12806	5.1034e-21	4.90966e-20		MDFIC	16.0548
KIAA1551	31.9818	1.03069	1.56535e-213	5.42687e-212		GSTA1	97.2819	5.6576	0	0		DEK	42.3781	0.842203	0	0		RCAN3	27.031	1.24732	5.05286e-148	1.91841e-146		TBCB	30.66	0.955697	1.99391e-188	6.66654e-187		AHI1	47.4554	1.1574	0	0		C21orf58	22.2249	1.4172	1.08823e-99	3.68083e-98		FAM159B	9.90329	3.6887	7.9442e-21	7.59456e-20		C14orf132	16.0295
PHYHIPL	31.9493	0.994522	5.10153e-213	1.76672e-211		SDF2L1	96.9152	2.10204	0	0		COL4A5	42.3605	2.04815	0	0		CDC42	27.0256	0.581877	7.20525e-149	2.75525e-147		TCEAL2	30.6383	1.49968	3.13606e-187	1.04415e-185		ATP6V0E2	47.4321	1.55158	0	0		ENPP2	22.0641	1.4788	2.36933e-98	7.97182e-97		MT-ND2	9.8846	0.555315	8.47676e-21	8.0964e-20		PAPSS2	16.0171
DAPK1	31.8309	1.09957	1.98573e-211	6.82503e-210		TMBIM6	96.7161	1.18029	0	0		FAM111A	42.3524	1.74587	0	0		SET	27.0252	0.600674	1.16819e-148	4.45644e-147		USH1C	30.4801	1.77823	2.75795e-185	9.11609e-184		IDS	47.1758	1.50256	0	0		CBX6	22.0375	1.06704	2.81582e-98	9.45417e-97		DDR1	9.85236	1.50125	1.17296e-20	1.11135e-19		C15orf48	15.9986
PCM1	31.6907	0.603551	1.05195e-210	3.59622e-209		BTG1	96.3359	1.37499	0	0		CKS1B	42.312	1.25874	0	0		HNRNPAB	26.8102	1.01242	7.11546e-146	2.68237e-144		SSBP4	30.4479	1.12237	1.75099e-185	5.79971e-184		FAM213A	47.0714	0.93487	0	0		MAP6	21.9714	1.80146	1.47122e-97	4.90354e-96		CELF3	9.77124	2.08493	2.26166e-20	2.11216e-19		CD200	15.859
EPHB4	31.6748	1.51927	6.28882e-209	2.13392e-207		SNHG8	95.881	1.29655	0	0		APCDD1	42.213	1.89706	0	0		RCOR2	26.7467	2.22032	1.0482e-144	3.93291e-143		LINC01420	30.4332	0.952206	1.51263e-185	5.01539e-184		IMMP1L	46.9774	1.1983	0	0		COX7A2	21.8772	0.630846	3.22204e-97	1.07055e-95		FFAR1	9.76227	1.6405	2.40072e-20	2.2381e-19		CGREF1	15.805
CADM1	31.6624	0.734711	2.75594e-210	9.41147e-209		NOSIP	95.4609	1.86495	0	0		MEX3A	42.1597	1.32097	0	0		SHF	26.7355	2.20933	1.57588e-144	5.88513e-143		HSD17B14	30.3975	2.13017	4.89333e-184	1.6091e-182		REXO2	46.788	1.17716	0	0		ARPP19	21.7971	0.936158	2.2138e-96	7.27976e-95		FKBP8	9.74563	1.0064	2.72239e-20	2.53281e-19		CEP192	15.6067
SFRP5	31.5848	0.923209	1.8986e-209	6.45604e-208		CELA2A	95.3425	7.17758	0	0		HMGB1	42.1476	0.540843	0	0		RASGRP1	26.6906	2.53147	4.8212e-144	1.79837e-142		RIMBP2	30.2207	2.03658	3.43639e-182	1.12192e-180		C21orf58	46.6182	1.6676	0	0		ASB9	21.7691	1.30539	3.09459e-96	1.01657e-94		SEP15	9.74089	1.07947	2.83013e-20	2.62921e-19		PHF20L1	15.5358
CYFIP1	31.5684	0.929402	1.18187e-208	4.00182e-207		TC2N	95.2461	2.9079	0	0		PON2	42.1289	1.14204	0	0		RGS16	26.6519	1.99337	9.03746e-144	3.36324e-142		CXXC4	30.1696	1.16802	1.6607e-182	5.433e-181		NDRG4	46.5298	2.55964	0	0		HAGH	21.7119	1.33685	1.39511e-95	4.55478e-94		UCP2	9.71092	1.55414	3.62551e-20	3.35155e-19		CMTM8	15.5263
JAG1	31.5582	1.03976	2.22106e-208	7.51256e-207		EIF1	94.5798	0.728752	0	0		CDC42EP1	42.0642	1.49291	0	0		KIF19	26.5405	2.93535	1.6152e-142	5.97605e-141		ITM2C	30.1398	0.780247	1.13296e-182	3.71412e-181		PLD3	46.2728	0.807785	0	0		BAIAP3	21.7047	1.8081	1.92796e-95	6.28802e-94		B9D1	9.62199	1.62222	7.35148e-20	6.72779e-19		VTN	15.5135
TRIM24	31.4201	0.905631	1.49847e-206	5.04175e-205		DNAJB1	94.0655	2.32279	0	0		HELLS	42.0127	1.75258	0	0		ATRX	26.5245	0.63759	9.33241e-144	3.46896e-142		RAD21	29.9864	0.871494	8.75957e-181	2.85401e-179		RCAN3	46.1195	1.49566	0	0		ABCC9	21.5349	4.70982	7.03534e-94	2.25767e-92		PRDX2	9.61123	0.607399	7.77813e-20	7.11213e-19		C1QTNF4	15.5058
SOX11	31.4117	1.24459	5.40891e-206	1.81415e-204		LDHB	94.0192	3.8458	0	0		WLS	41.9934	1.67155	0	0		PPP1R14B	26.4038	0.923876	6.49981e-142	2.39652e-140		GPX3	29.9622	2.77003	5.07949e-179	1.63661e-177		MEG3	46.0005	0.720953	0	0		CD9	21.5026	3.21506	1.13703e-93	3.64147e-92		MS4A8	9.60411	3.18281	8.58137e-20	7.83314e-19		PCLO	15.4864
HNMT	31.3728	1.28477	1.28538e-205	4.29311e-204		RPL37A	93.8087	0.91608	0	0		PUF60	41.8942	0.801229	0	0		EVL	26.3766	1.11993	1.14661e-141	4.22274e-140		MAPRE3	29.9359	1.63887	1.83166e-179	5.91951e-178		KCNMA1	45.9878	1.80312	0	0		ATP2A3	21.4806	1.37149	8.06319e-94	2.58492e-92		TMA7	9.60016	0.644189	8.46859e-20	7.73682e-19		SORBS2	15.4574
AMOTL2	31.3468	1.42951	5.39063e-205	1.79669e-203		PPIC	93.1436	2.6032	0	0		SEPT10	41.7642	1.62331	0	0		SMARCA5	26.3214	0.802631	2.60507e-141	9.56092e-140		CCDC28B	29.9294	1.10484	6.76217e-180	2.19204e-178		SYT13	45.8834	2.50512	0	0		CNKSR3	21.4691	1.6786	1.41013e-93	4.50707e-92		BCAM	9.58286	0.944091	9.8289e-20	8.94632e-19		AKAP9	15.4446
SOD3	31.3228	1.59045	1.15104e-204	3.82443e-203		DNAJB9	93.1338	1.88615	0	0		SORBS2	41.6887	0.891663	0	0		SVBP	26.3197	0.982848	3.37327e-141	1.23661e-139		DACH1	29.925	1.82852	3.76951e-179	1.21576e-177		SYT7	45.772	2.27788	0	0		TMEM59	21.4186	0.610737	1.26013e-93	4.03165e-92		RPS6	9.58114	0.383568	9.21953e-20	8.40605e-19		RIMS2	15.4385
WWTR1	31.3195	1.2038	3.13994e-205	1.04763e-203		GLTSCR2	92.7441	1.60568	0	0		APP	41.647	0.624738	0	0		KCTD12	26.3003	1.78777	1.69151e-140	6.14446e-139		DCDC1	29.9244	2.27562	8.16973e-179	2.61644e-177		FXYD6	45.7416	1.40754	0	0		SLC35F3	21.4177	2.76133	4.77412e-93	1.50929e-91		TCEAL2	9.57644	1.60148	1.05177e-19	9.5624e-19		VEGFB	15.405
IGF2BP2	31.2944	0.650676	9.45775e-206	3.16216e-204		HSPD1	91.6751	1.29341	0	0		B3GALT1	41.6457	3.33624	0	0		HNRNPK	26.218	0.494234	8.16685e-141	2.98361e-139		SPOCK3	29.9031	3.8023	3.12526e-178	9.97897e-177		PALM	45.7243	2.83591	0	0		PNMA2	21.4085	2.14102	4.53832e-93	1.43759e-91		CAPZB	9.55807	1.07474	1.20776e-19	1.09339e-18		KIAA1107	15.4008
PPM1B	31.2626	0.882368	1.12081e-204	3.72786e-203		GAMT	91.3628	2.06524	0	0		LMNB1	41.6381	1.65897	0	0		PSMB5	26.1825	0.637406	3.33921e-140	1.20885e-138		MEAF6	29.8973	0.889642	4.34331e-180	1.4108e-178		KIF3A	45.6196	1.34969	0	0		ATP2B1	21.3844	0.813299	3.3519e-93	1.06282e-91		CSTB	9.5458	0.960702	1.32335e-19	1.19633e-18		GPBAR1	15.3988
WFDC2	31.1544	0.770845	9.2378e-204	3.06296e-202		FOSB	91.0749	1.80434	0	0		TMEM72	41.6254	2.47904	0	0		RP11-382A20.3	26.1687	1.06562	1.2063e-139	4.35223e-138		NOVA1	29.8884	1.7254	8.84133e-179	2.82869e-177		ORAI2	45.5911	1.83972	0	0		SNRPN	21.3795	0.673537	3.07264e-93	9.75244e-92		PIGP	9.54251	1.40251	1.37327e-19	1.24006e-18		BLMH	15.398
HNRNPR	31.0339	0.537449	1.0102e-202	3.33908e-201		ENKD1	90.7655	2.77837	0	0		CSRP2	41.617	1.68899	0	0		CCT5	26.1645	0.73659	6.28002e-140	2.27091e-138		RIMS2	29.7675	1.97303	2.14597e-177	6.82477e-176		EDARADD	45.5388	2.89878	0	0		SEMA3A	21.3668	2.59724	1.11021e-92	3.49253e-91		NDUFS8	9.54097	0.852386	1.36907e-19	1.23696e-18		GAD2	15.391
CTGF	31.0163	1.17539	1.26285e-201	4.15699e-200		POMC	90.7596	2.92235	0	0		LY6E	41.5447	1.50148	0	0		PROX1	26.1199	0.861967	3.16733e-139	1.14017e-137		HS6ST3	29.6676	3.24284	8.18787e-176	2.58339e-174		TMSB4X	45.3261	0.7758	0	0		CADPS	21.356	0.875643	4.75563e-93	1.50493e-91		PGAM1	9.5254	1.22066	1.56322e-19	1.40959e-18		TMEM59L	15.3256
ANXA2	30.9644	0.779552	3.9775e-202	1.31065e-200		UBC	90.4297	1.25301	0	0		CDK6	41.4812	1.03281	0	0		NKX6-1	26.0982	1.30744	1.06562e-138	3.82307e-137		CELF4	29.6006	1.52368	5.20361e-176	1.64506e-174		PLP2	45.244	0.948698	0	0		RAB11A	21.3164	0.736567	1.02582e-92	3.23021e-91		NBEAL1	9.52438	1.06191	1.55502e-19	1.4026e-18		ANXA7	15.2852
ARHGEF1	30.947	1.39324	3.63498e-200	1.18676e-198		ELMO1	90.0958	2.19636	0	0		CTDSPL	41.4809	1.26869	0	0		CAMK2N1	26.0839	0.897734	4.15722e-139	1.49482e-137		CSRNP3	29.5695	1.57328	2.01404e-175	6.34205e-174		CASR	45.1743	2.41458	0	0		ATP6V0D1	21.3065	1.05713	1.66894e-92	5.22958e-91		GAD2	9.5147	1.51884	1.69728e-19	1.52918e-18		FAM174A	15.2279
MEX3A	30.9242	1.08542	3.29843e-200	1.07798e-198		REG4	90.0169	4.13519	0	0		NFIB	41.4485	1.14931	0	0		SRRM4	26.0478	3.4561	1.17612e-137	4.17726e-136		COX7A2	29.5461	0.680209	3.1438e-176	9.97829e-175		KNDC1	45.1497	3.75776	0	0		SLC25A4	21.3039	0.926867	1.55025e-92	4.86722e-91		MYL12B	9.50916	0.756943	1.75542e-19	1.57978e-18		CCDC28B	15.1676
DCBLD2	30.8677	1.25208	2.38672e-199	7.77633e-198		CD81	89.8093	1.34995	0	0		RCN2	41.3245	0.931096	0	0		FAM96B	25.9856	0.75504	3.35797e-138	1.19665e-136		CST3	29.2145	0.70452	4.56358e-173	1.42439e-171		HHATL	44.9893	5.86977	0	0		TENM3	21.2279	1.85241	1.08407e-91	3.38361e-90		HSD17B10	9.48053	1.07086	2.21423e-19	1.9804e-18		KIAA1324	15.1658
AKAP7	30.8536	1.13358	1.66077e-199	5.4166e-198		NDUFA4	89.6886	1.12535	0	0		COX6B1	41.2664	0.63668	0	0		GRB2	25.9698	0.930809	7.34132e-138	2.61034e-136		NEURL1	29.1686	1.29308	2.30089e-171	7.14665e-170		DYNLT1	44.7892	0.911933	0	0		TAGLN3	21.1045	1.49453	7.21494e-91	2.23013e-89		NDUFB1	9.47576	0.917344	2.27739e-19	2.03575e-18		PTPRN2	15.1448
DLG3	30.8265	1.06046	3.54908e-199	1.15399e-197		SERPINB1	88.8587	1.91642	0	0		KIAA0101	41.1446	2.41944	0	0		THEM6	25.9621	2.0962	5.16622e-137	1.81871e-135		SYT4	29.0312	1.83805	9.88776e-170	3.04451e-168		OLFM2	44.7647	1.78594	0	0		USP18	21.0316	1.74591	3.34122e-90	1.02681e-88		MT-ND4	9.45269	0.471841	2.60082e-19	2.31902e-18		DPP10	15.1433
GDF11	30.7828	1.15943	2.22751e-198	7.19884e-197		RPL21	88.6322	0.749581	0	0		ENO1	41.1039	0.628882	0	0		RAP1GAP2	25.9588	1.25955	1.53605e-137	5.44958e-136		CTD-2314G24.2	29.0063	2.39476	4.50617e-169	1.38083e-167		SLC37A4	44.7607	1.46886	0	0		TRPM3	20.9191	2.27712	2.84402e-89	8.61572e-88		SMIM6	9.43569	1.55019	3.17358e-19	2.82263e-18		SLC25A4	15.1181
DHX9	30.7785	0.752896	6.81022e-199	2.20762e-197		GDF15	87.9718	4.01094	0	0		TAX1BP3	41.0407	1.40765	0	0		ATP6V0E2	25.9124	1.18214	3.96917e-137	1.39885e-135		GNAO1	28.9791	1.88805	4.77118e-169	1.45923e-167		ANKRD65	44.7571	1.29157	0	0		HSD11B1L	20.8865	1.5105	3.89786e-89	1.17859e-87		SRP9	9.402	0.809621	4.07144e-19	3.60613e-18		COL12A1	15.1044
NREP	30.7517	0.585452	2.46714e-199	8.03016e-198		ADD3	87.777	1.89774	0	0		SPP1	40.9949	3.23533	0	0		HECTD4	25.8948	1.2504	8.37898e-137	2.94001e-135		PRDX5	28.9547	0.632715	2.77973e-170	8.59214e-169		FABP5	44.7183	1.16821	0	0		PPL	20.8564	1.46981	6.68709e-89	2.01623e-87		MRFAP1	9.39008	0.813744	4.46565e-19	3.94544e-18		AAED1	15.0823
ERBB3	30.6983	0.94986	6.91147e-198	2.22687e-196		RPS17	87.6089	0.985162	0	0		GADD45B	40.8664	1.42626	0	0		MACF1	25.8573	0.894349	9.64178e-137	3.37939e-135		COX7A2L	28.9539	0.698542	6.89711e-170	2.12572e-168		DPYSL2	44.6961	1.4939	0	0		RUFY3	20.835	1.20294	8.7373e-89	2.63191e-87		CD164	9.37591	0.846587	5.00024e-19	4.40921e-18		BHMT2	15.0734
C11orf54	30.6966	0.924238	1.02741e-197	3.30365e-196		BCAT1	87.1994	3.43453	0	0		PPP1R1B	40.7735	3.40762	0	0		LRRC42	25.8564	1.18917	1.60086e-136	5.59251e-135		FAM213A	28.7138	0.817182	2.99769e-167	9.08985e-166		FBXO17	44.692	1.706	0	0		AK5	20.8308	3.33383	1.73648e-88	5.21598e-87		KCNK16	9.3615	1.58304	5.63414e-19	4.9596e-18		IFI27L2	15.0023
LRP6	30.6929	0.934924	1.17461e-197	3.77318e-196		LGALS3BP	87.0894	1.77906	0	0		METRNL	40.7206	1.3871	0	0		UBXN1	25.8507	0.680795	5.32635e-137	1.87302e-135		KIF19	28.6143	3.30365	1.10158e-164	3.29339e-163		CAMK2B	44.6647	1.78957	0	0		TTC8	20.7412	1.59282	5.72996e-88	1.71791e-86		EEF2	9.35562	0.564749	5.78576e-19	5.08924e-18		MYT1L	14.9623
NDUFA4	30.6347	0.475211	6.05462e-199	1.96467e-197		KLF6	86.8916	2.14256	0	0		VGLL4	40.6931	1.05743	0	0		C22orf42	25.7299	2.59571	9.41846e-135	3.2582e-133		CD82	28.5819	2.03216	9.56705e-165	2.86294e-163		CHST8	44.6324	4.24132	0	0		RAB3C	20.696	1.43597	1.07954e-87	3.21845e-86		HIF3A	9.34196	1.81813	6.62349e-19	5.8165e-18		C21orf58	14.9244
WASF3	30.598	1.48932	1.25213e-195	3.99806e-194		SELK	86.5686	1.37404	0	0		CAPN6	40.6482	1.81904	0	0		MYCL	25.6765	2.85394	3.71413e-134	1.28069e-132		SSX2IP	28.5771	1.56699	8.6418e-165	2.58849e-163		C9orf16	44.5601	0.943726	0	0		NDUFS4	20.6749	0.856341	1.14878e-87	3.42169e-86		SUB1	9.34128	0.715406	6.49839e-19	5.70821e-18		PRKAR1A	14.9036
ATXN7L3B	30.5632	0.613555	1.22804e-196	3.93689e-195		RPL23	86.1151	0.754073	0	0		XPO1	40.6328	0.923446	0	0		MYL6B	25.6188	0.725663	1.13346e-134	3.91681e-133		AIF1	28.5718	2.55248	1.98715e-164	5.92987e-163		IGSF1	44.2975	2.48366	0	0		MAPRE3	20.6479	1.44306	2.54504e-87	7.55935e-86		CD200	9.32164	1.88265	7.74823e-19	6.79673e-18		NPAS3	14.8939
SCN9A	30.5452	1.08358	1.07151e-195	3.42475e-194		JUN	85.8394	1.77805	0	0		PHLDB1	40.5452	1.90602	0	0		ACTR1A	25.5931	1.16802	4.51241e-134	1.55428e-132		ACLY	28.4038	1.11531	1.50594e-163	4.47298e-162		TAGLN2	44.1677	0.982517	0	0		POU2F2	20.5602	3.07872	1.90123e-86	5.60022e-85		EIF4E	9.28767	1.22656	9.98783e-19	8.72296e-18		MAPRE3	14.8922
GPC4	30.5048	1.73735	1.80147e-194	5.70079e-193		SQLE	85.743	1.73824	0	0		RASSF7	40.4482	1.30256	0	0		PLEKHB1	25.5025	1.38082	5.66461e-133	1.93238e-131		OAZ1	28.3957	0.558881	3.72093e-164	1.10726e-162		ATP2A3	44.1246	1.62917	0	0		GLS	20.5403	1.10777	1.17102e-86	3.45888e-85		PMVK	9.26824	1.27494	1.16272e-18	1.01132e-17		ARHGEF26	14.8291
CTNNA1	30.4949	0.772159	1.80805e-195	5.76159e-194		IER2	85.2379	1.76716	0	0		GOLM1	40.3536	0.983176	0	0		JARID2	25.5017	1.32543	5.54688e-133	1.89425e-131		CISD1	28.3703	0.967507	2.67297e-163	7.93195e-162		FOXO1	44.0091	1.65444	0	0		NGFRAP1	20.4962	0.483798	1.65266e-86	4.87253e-85		COA3	9.23497	0.894488	1.48684e-18	1.28938e-17		B4GAT1	14.7973
USP6NL	30.4518	1.36488	3.99868e-194	1.26039e-192		FAM46C	85.021	2.08382	0	0		ACTN4	40.3422	0.922936	0	0		TDG	25.4997	0.834102	2.17815e-133	7.45427e-132		GRSF1	28.3654	1.07757	4.38153e-163	1.29779e-161		MAP1A	43.8973	2.29513	0	0		TSHZ2	20.4604	1.22968	6.56859e-86	1.93126e-84		N4BP2L2	9.22259	0.908886	1.6433e-18	1.42158e-17		KIF3A	14.7832
MSH2	30.3937	1.07175	7.80535e-194	2.453e-192		RPL4	84.2875	0.821479	0	0		ATAD2	40.1704	2.29692	0	0		PCNT	25.4861	1.53825	1.00771e-132	3.43396e-131		SCGB2A1	28.2822	2.476	1.79416e-161	5.27995e-160		ACLY	43.7906	1.227	0	0		GPC6	20.4058	1.69159	2.00217e-85	5.85969e-84		POLR2J3	9.20472	1.23364	1.8941e-18	1.63455e-17		NUDT4	14.7375
QPRT	30.3082	0.745773	1.81065e-193	5.6736e-192		UGDH	84.2646	1.48934	0	0		FAM60A	40.1341	0.745894	0	0		MIEN1	25.3878	0.853032	2.33551e-132	7.94172e-131		C1QTNF4	28.2416	1.5962	2.24846e-161	6.61081e-160		DHRS2	43.718	3.11493	0	0		SLC4A8	20.4003	1.79545	2.27847e-85	6.66223e-84		GDI1	9.19303	1.44232	2.07774e-18	1.78916e-17		LINC00261	14.7254
TCEA3	30.2847	0.675316	6.69821e-194	2.10713e-192		JUND	84.2049	1.66963	0	0		NINJ1	40.0569	1.19637	0	0		BTBD3	25.3564	1.1433	9.7755e-132	3.30648e-130		GCH1	28.2164	2.07775	5.69024e-161	1.66994e-159		PLXNC1	43.5978	2.23997	0	0		MYO3A	20.3943	1.59919	2.41571e-85	7.05706e-84		RP11-527L4.2	9.17392	5.42099	2.45022e-18	2.10311e-17		SEMA3A	14.7077
ZC3H13	30.1545	0.638892	1.31973e-191	4.1071e-190		TMED2	84.1504	1.37121	0	0		LIMCH1	39.9829	1.42958	0	0		NLRP1	25.3407	1.2001	1.10073e-131	3.71919e-130		CELF3	28.0201	1.74709	4.34905e-159	1.26933e-157		CDC42BPA	43.5279	1.39563	0	0		KIF3A	20.377	1.08009	2.44855e-85	7.14646e-84		HIGD1A	9.1588	1.3709	2.70271e-18	2.31484e-17		KLC1	14.6582
SRSF5	30.12	0.506036	1.54693e-191	4.80948e-190		EDF1	84.0321	0.904591	0	0		PALMD	39.9256	2.57024	0	0		IGFBPL1	25.3373	3.12538	6.15313e-131	2.07028e-129		SMARCA2	28.0066	1.29473	3.93799e-159	1.15041e-157		RAP1GAP	43.4997	1.83166	0	0		LINC00936	20.3721	1.73432	3.8771e-85	1.12747e-83		TRAPPC4	9.11488	1.15068	3.76642e-18	3.20612e-17		MAP4K4	14.6289
LRBA	30.1085	0.835317	1.13113e-190	3.50309e-189		DUSP2	83.8974	3.81253	0	0		FAM171A1	39.8965	1.50118	0	0		ARL3	25.2765	0.735961	2.25819e-131	7.61395e-130		TUBB1	27.9901	2.9193	2.83248e-158	8.16991e-157		P2RY1	43.4001	3.52125	0	0		GRSF1	20.3591	1.00479	3.39899e-85	9.90236e-84		DRAP1	9.09884	0.962201	4.23924e-18	3.59997e-17		TMEM130	14.6248
WNK2	30.0961	0.880551	1.0137e-190	3.14247e-189		NR4A1	83.8149	2.02208	0	0		GABRA1	39.794	2.85315	0	0		MYO6	25.187	0.892798	2.43355e-130	8.16211e-129		MGAT4C	27.9502	3.21917	7.43034e-158	2.13932e-156		NPTX2	43.2769	5.22545	0	0		OLFML3	20.344	1.62513	5.92882e-85	1.72097e-83		MTHFD2L	9.08234	1.4064	4.84931e-18	4.10603e-17		SLC22A17	14.5624
EGFR	30.0936	1.38272	6.37804e-190	1.96954e-188		CST3	83.7926	1.13296	0	0		TGFBR2	39.7844	1.54752	0	0		TOP1	25.0845	0.629224	1.12755e-129	3.75811e-128		GSTA4	27.9211	1.05065	1.80067e-158	5.21737e-157		SLC16A9	43.2027	1.7845	0	0		SYT17	20.3292	1.86025	7.93999e-85	2.29849e-83		C14orf2	9.01885	0.733135	7.73259e-18	6.48036e-17		RUFY3	14.4943
SCN1A	30.0391	2.67311	2.62598e-188	8.04677e-187		SLC25A37	83.6124	1.72453	0	0		PEG10	39.729	0.819287	0	0		IDS	25.0716	1.11082	3.49608e-129	1.1616e-127		ZKSCAN1	27.864	0.690373	1.94831e-158	5.64002e-157		MT-CYB	43.0395	0.581118	0	0		HINT1	20.2933	0.437298	6.04757e-85	1.75385e-83		AIP	9.01488	1.26806	8.08036e-18	6.76826e-17		PNMA1	14.4697
MIDN	30.0351	0.751874	4.33252e-190	1.34048e-188		EIF3E	83.5896	1.03295	0	0		IL1R1	39.6621	1.30305	0	0		YWHAE	25.0683	0.437326	9.56028e-130	3.19309e-128		SYT17	27.8439	2.03031	3.95877e-157	1.13062e-155		ATP6V1G1	42.9852	0.647428	0	0		KCNMA1	20.29	1.40923	1.32804e-84	3.83057e-83		APOH	9.00636	2.4417	8.72992e-18	7.30468e-17		CTXN1	14.4241
VTN	29.9021	2.20585	6.33651e-187	1.92324e-185		SEC61G	83.5785	1.1598	0	0		TSPAN6	39.6072	0.859333	0	0		MAP6	25.0586	1.59575	8.96371e-129	2.97517e-127		SYT7	27.8375	1.94251	4.70557e-157	1.34271e-155		DCBLD1	42.8982	1.95326	0	0		TSTD1	20.2434	0.653122	1.80206e-84	5.19313e-83		ITGB1	8.97384	0.718426	1.09044e-17	9.08609e-17		COX8A	14.4067
CTBP2	29.8833	0.73272	3.39037e-188	1.03791e-186		HSPA8	82.5037	1.22569	0	0		NPNT	39.5968	1.5477	0	0		BZW2	24.9446	1.00106	6.25118e-128	2.06412e-126		RGS9	27.7895	1.59546	7.15617e-157	2.04015e-155		KLHDC8B	42.8584	1.39672	0	0		GUK1	20.2227	0.695851	2.53257e-84	7.29171e-83		RUNX1T1	8.97131	1.61778	1.12725e-17	9.38546e-17		NPDC1	14.4026
PDX1	29.8681	0.715692	3.80338e-188	1.16324e-186		MTUS1	82.4389	2.17625	0	0		HIGD2A	39.5799	0.665434	0	0		RBFOX2	24.9143	0.865022	8.75247e-128	2.88407e-126		DPYSL2	27.7863	1.33845	7.42344e-157	2.11446e-155		MAP6	42.8415	2.04188	0	0		COX8A	20.1982	0.603488	3.93017e-84	1.1275e-82		RPL19	8.97007	0.33038	1.06403e-17	8.87298e-17		SMARCA2	14.397
ANKRD50	29.8654	1.31093	3.09626e-187	9.40661e-186		PDCD4	82.0891	1.23786	0	0		DTYMK	39.3087	1.35261	0	0		DPYSL2	24.8895	1.10832	1.76861e-127	5.81581e-126		GNB2	27.7863	0.933461	3.66174e-157	1.04673e-155		SH3GL2	42.8254	2.45914	0	0		TMX4	20.1823	1.19943	8.23682e-84	2.35243e-82		RTN1	8.96434	1.82887	1.19182e-17	9.91269e-17		KIF1A	14.3941
ADNP	29.8634	0.801763	7.90697e-188	2.41136e-186		RPS20	81.7059	0.709697	0	0		PIK3C2G	39.2763	4.2511	0	0		SCN1B	24.8242	3.60635	4.38712e-126	1.4294e-124		MPC2	27.6937	0.696513	1.75081e-156	4.97804e-155		RUNDC3A	42.7801	2.07719	0	0		IFI6	20.1641	1.80218	1.39763e-83	3.98095e-82		YWHAE	8.96071	0.594554	1.20177e-17	9.99287e-17		SSBP4	14.3643
PTPRG	29.8558	1.12217	2.15522e-187	6.56017e-186		PTF1A	81.4507	3.02183	0	0		EFNA1	39.1398	1.40033	0	0		CAMK2B	24.7731	1.32538	2.79663e-126	9.14923e-125		SNAP25	27.6802	1.49063	8.78501e-156	2.48896e-154		TRPM5	42.7582	4.68759	0	0		EXOC6	20.1539	1.40419	1.54579e-83	4.39512e-82		C6orf48	8.92635	0.836798	1.56302e-17	1.29126e-16		COL14A1	14.3247
HS6ST2	29.8075	1.65439	3.0352e-186	9.16879e-185		NPW	81.4498	2.8802	0	0		AGRN	39.0982	1.8634	0	0		TUBA4A	24.7481	1.05249	3.22691e-126	1.05461e-124		RAB11A	27.5016	0.741383	1.54358e-154	4.35008e-153		ARL16	42.7391	1.16445	0	0		RFX6	20.1484	1.46049	1.51273e-83	4.30495e-82		MLF2	8.90872	0.919184	1.79474e-17	1.47849e-16		KIF5C	14.2918
SERPINA5	29.7753	1.33703	3.82849e-186	1.15433e-184		H3F3B	81.4163	0.755342	0	0		WEE1	39.0266	1.27833	0	0		KCNJ6	24.7107	1.30403	1.06366e-125	3.4585e-124		LY6H	27.4889	2.43909	1.72935e-153	4.86076e-152		SCP2	42.4029	0.912133	0	0		ST8SIA4	20.1197	3.4739	4.1979e-83	1.18304e-81		ATP6V0D1	8.90294	1.21907	1.8816e-17	1.54764e-16		GABRB3	14.2666
ZBTB1	29.7149	1.15277	1.55552e-185	4.67243e-184		RPS11	80.7536	0.5718	0	0		SERPINA1	38.917	0.837469	0	0		KLC1	24.6867	1.17172	1.876e-125	6.07513e-124		FAM174A	27.4429	1.34875	2.23516e-153	6.27141e-152		PSD	42.3786	2.23536	0	0		GNAO1	20.1171	1.65198	2.86939e-83	8.12232e-82		NDUFAF3	8.86418	0.993909	2.50842e-17	2.05369e-16		ETFDH	14.2582
PARD3	29.6426	0.932174	4.47293e-185	1.34104e-183		SLC16A12	80.4561	2.65931	0	0		GSTO1	38.8339	0.783973	0	0		PSMA7	24.6526	0.523254	1.1542e-125	3.74911e-124		PSAP	27.4243	0.655687	8.10784e-154	2.28292e-152		MAPRE3	42.3753	1.69804	0	0		GNB1	20.1075	0.883271	2.33418e-83	6.61903e-82		CHCHD2	8.83906	0.551696	2.98545e-17	2.43674e-16		KCTD8	14.2416
PTPN14	29.6285	1.49124	3.17272e-184	9.46774e-183		ANPEP	80.4327	5.527	0	0		NUCKS1	38.7946	0.520248	0	0		MAN1A1	24.6302	0.962844	3.77982e-125	1.22279e-123		APBB1	27.4077	1.5616	7.46513e-153	2.08906e-151		CELF3	42.2873	1.88506	0	0		FAM46A	20.1018	1.30595	3.21269e-83	9.06996e-82		DIRAS3	8.83203	1.87336	3.22295e-17	2.62523e-16		MARCH11	14.2115
FRY	29.589	1.28065	5.52212e-184	1.64632e-182		GRN	80.3556	1.49387	0	0		NOTCH3	38.7541	2.33759	0	1.36689e-307		ILF3	24.5231	0.653683	2.31271e-124	7.45156e-123		PDK4	27.3847	2.30219	2.86849e-152	8.0132e-151		RAB11A	42.1995	0.796978	0	0		SYT13	20.0704	1.87858	7.25315e-83	2.03867e-81		UCN3	8.82686	2.29152	3.36634e-17	2.74062e-16		CLEC11A	14.207
TGFBR2	29.5594	1.23937	9.54853e-184	2.84407e-182		GMNN	80.2674	1.34364	0	0		GSTK1	38.691	0.900405	0	0		ARID4B	24.5178	0.694607	3.26762e-124	1.05176e-122		MAP1LC3A	27.2342	1.05121	1.7545e-151	4.88414e-150		NDN	42.104	1.19772	0	0		CELF3	20.0478	1.57651	9.22704e-83	2.58892e-81		ATP6V1E1	8.78728	1.42595	4.49788e-17	3.64882e-16		CRTC3	14.1821
TMPO	29.4386	0.792211	5.66565e-183	1.68126e-181		SPCS2	79.7429	1.00668	0	0		CDH3	38.6792	2.46805	1.20683e-307	4.02656e-306		MFGE8	24.4538	1.75108	5.85199e-123	1.86295e-121		GNB1	27.2308	0.933115	1.55896e-151	4.34359e-150		RGS2	42.0812	1.87966	0	0		HTR1F	20.0355	3.11393	1.68277e-82	4.7091e-81		GRIA3	8.78117	2.95781	4.75243e-17	3.8514e-16		MVB12B	14.1671
TEAD2	29.3195	1.21643	6.67598e-181	1.96284e-179		HSPE1	79.3199	1.30775	0	0		PROM1	38.5684	1.49422	1.25486e-307	4.18243e-306		KIF1A	24.4096	1.01962	4.86905e-123	1.55314e-121		PLIN3	27.0776	1.21134	1.40819e-149	3.87283e-148		ARID5B	42.0145	1.32516	0	0		AES	19.9872	0.69277	1.61658e-82	4.52785e-81		RUNDC3A	8.77885	1.89542	4.80214e-17	3.88971e-16		SDC2	14.1671
SLC38A2	29.2764	0.880888	7.02948e-181	2.06487e-179		SPX	78.9269	5.97983	0	0		RHOV	38.5195	1.43873	3.01851e-307	1.00501e-305		TP53I11	24.3352	1.73433	5.91414e-122	1.86599e-120		SLC25A14	27.0263	1.87921	8.57708e-149	2.34274e-147		SYT11	42.0142	2.16357	0	0		APBB1	19.8644	1.48278	2.21613e-81	6.15848e-80		TUBA1A	8.6944	0.888008	8.65796e-17	6.9442e-16		CDCP1	14.1398
SLC40A1	29.1538	0.9277	2.49771e-179	7.30328e-178		HDLBP	78.9046	1.25439	0	0		TOP2A	38.5007	2.87595	1.47775e-304	4.88453e-303		YWHAB	24.3334	0.548643	1.04602e-122	3.32001e-121		PPY	27.0135	2.44704	1.04264e-148	2.84543e-147		C2orf54	41.9954	2.21103	0	0		MYL6	19.8627	0.400978	9.66341e-82	2.69478e-80		GTF3C6	8.67458	0.957495	1.0332e-16	8.25581e-16		GNAI1	14.1381
NOTCH1	29.1156	1.31371	2.08469e-178	6.05128e-177		HHIP-AS1	78.8517	4.44133	0	0		MYL12A	38.4274	0.699106	0	2.25086e-307		GNB1	24.309	0.814256	3.33911e-122	1.05562e-120		SLC29A1	27.0116	1.25734	4.15555e-149	1.13992e-147		TMEM132B	41.9179	3.08405	0	0		FFAR4	19.8353	2.00276	3.98061e-81	1.10427e-79		C10orf10	8.66294	1.71313	1.1341e-16	9.03266e-16		RBP1	14.1275
MNX1	29.0858	0.829032	9.78744e-179	2.8488e-177		EPHX1	78.7479	1.84369	0	0		MCAM	38.4084	2.38164	7.02772e-304	2.31813e-302		GNAI3	24.2151	0.744485	2.25225e-121	7.07121e-120		KIF3A	26.9916	1.11255	5.77311e-149	1.57957e-147		GNG2	41.8749	1.83885	0	0		MARCH8	19.8266	1.4146	3.968e-81	1.10172e-79		EMC7	8.63676	1.10909	1.3683e-16	1.08654e-15		NME3	13.9834
SMARCD1	29.0219	0.968956	1.26227e-177	3.65076e-176		RPL31	78.7408	0.834698	0	0		CXCL1	38.3673	2.19399	1.48628e-303	4.88743e-302		ENO2	24.1975	1.83469	1.19141e-120	3.72958e-119		POLR2L	26.9831	0.641128	2.87777e-149	7.90768e-148		FNBP1L	41.7211	0.874098	0	0		PBX3	19.6964	2.04561	4.62264e-80	1.27023e-78		HMP19	8.62974	3.182	1.4621e-16	1.15929e-15		EPHA4	13.9825
FUS	29.0169	0.449822	1.37598e-178	3.99772e-177		HSP90AA1	78.7112	1.43318	0	0		ZNF83	38.3585	1.26388	2.9812e-305	9.8847e-304		FAM32A	24.1239	0.774212	1.65069e-120	5.16225e-119		TAGLN2	26.9652	0.873452	5.55829e-149	1.52209e-147		SCG2	41.7074	1.30244	0	0		CACNA2D1	19.6534	1.27838	5.8617e-80	1.60656e-78		NDUFB8	8.61368	0.754783	1.61247e-16	1.27473e-15		PDLIM4	13.9765
LAMB1	29.0168	0.924179	1.13432e-177	3.28368e-176		TMEM205	78.6198	1.3976	0	0		NCK2	38.2912	1.25717	3.0219e-304	9.9782e-303		SYT11	24.1213	1.68929	5.3461e-120	1.66538e-118		PEG10	26.8796	0.891368	5.1149e-148	1.39232e-146		MAPRE1	41.5823	1.02995	0	0		RGS4	19.6222	1.55288	1.26738e-79	3.45875e-78		MAGED2	8.60572	0.82652	1.71323e-16	1.35237e-15		CHN2	13.9086
TGIF2	28.9119	1.174	3.24312e-176	9.3123e-175		PPIF	78.2672	2.24519	0	0		GSTM3	38.2862	0.675705	2.15608e-306	7.1563e-305		PFDN2	24.1095	0.72708	2.09394e-120	6.54203e-119		ATP6V0D1	26.8121	1.04264	3.43619e-147	9.31388e-146		ST18	41.448	1.88543	0	0		CSRNP3	19.5374	1.31544	5.31927e-79	1.44548e-77		GPC5-AS1	8.60219	3.92308	1.79441e-16	1.41505e-15		GRASP	13.9006
FGD6	28.8206	1.2278	4.67789e-175	1.33361e-173		KDELR2	78.2573	1.42937	0	0		FAM13A	38.2552	1.46233	2.46518e-303	8.09806e-302		DPP10	24.0934	2.15268	1.3832e-119	4.29628e-118		ARPC5	26.7821	0.739156	2.94426e-147	7.98727e-146		CNBD2	41.3054	1.92553	0	0		GNG2	19.5061	1.48834	9.00849e-79	2.43557e-77		WDR54	8.57517	1.51708	2.16554e-16	1.70142e-15		ABHD14A	13.8764
WNT7B	28.7346	2.09568	2.02431e-173	5.73017e-172		SLC43A1	78.1191	3.25296	0	0		VTCN1	38.2351	3.00267	1.70421e-300	5.55827e-299		DSEL	24.0402	1.89113	4.27301e-119	1.32207e-117		JAKMIP2	26.7697	1.91507	2.91162e-146	7.85868e-145		KCNB2	41.2709	2.25234	0	0		GNB2	19.5043	0.828701	7.14221e-79	1.93427e-77		DZIP3	8.56789	1.23745	2.27443e-16	1.78522e-15		BASP1	13.8712
BIRC2	28.6591	0.693883	5.11566e-174	1.45323e-172		AURKAIP1	78.0448	1.13187	0	0		CLDN4	38.1446	0.731192	3.19298e-305	1.05759e-303		FSCN1	23.9902	2.01983	1.16728e-118	3.60458e-117		NPTN	26.705	1.39841	9.44409e-146	2.54258e-144		TPGS1	41.2693	1.56725	0	0		DZIP3	19.4764	1.06404	1.3364e-78	3.61009e-77		GTF2A2	8.56415	1.00726	2.33437e-16	1.83137e-15		PPP3CA	13.8452
ZNF217	28.6089	1.37678	1.45597e-172	4.08516e-171		SIVA1	78.0383	1.19616	0	0		ITIH5	37.8531	3.55458	1.41519e-294	4.52322e-293		HNRNPA2B1	23.9735	0.361951	9.37183e-120	2.91375e-118		ZSCAN16-AS1	26.6759	1.25209	1.21763e-145	3.27539e-144		NAT14	41.1636	1.39332	0	0		KCNK16	19.4231	1.18604	2.78531e-78	7.49872e-77		KCNH6	8.54004	2.34241	2.81849e-16	2.20466e-15		PPM1K	13.8316
GIT2	28.6006	1.09521	9.17044e-173	2.57757e-171		ALDH1A1	77.8337	1.10602	0	0		EDN1	37.8423	3.88292	3.02812e-294	9.66879e-293		GAA	23.8922	1.12835	3.79828e-118	1.16727e-116		PNMA2	26.6013	2.19741	1.75649e-144	4.70115e-143		USH1C	41.002	1.73831	0	0		DPYSL2	19.3915	1.19109	5.83948e-78	1.56948e-76		HIST2H2BE	8.51665	1.58754	3.32468e-16	2.58983e-15		H2AFY	13.8231
GATA6	28.4746	0.901379	1.83978e-171	5.13498e-170		ERGIC3	77.6803	1.27853	0	0		SLC44A3	37.7497	1.18973	2.23158e-296	7.17567e-295		DCTN2	23.8798	0.756241	2.82568e-118	8.70049e-117		CD200	26.5633	1.49285	1.956e-144	5.22637e-143		VEGFA	40.9616	0.939795	0	0		C4orf48	19.3497	1.08542	1.00814e-77	2.70276e-76		PSMB6	8.50201	0.788461	3.66761e-16	2.85209e-15		FOXA2	13.7956
VEPH1	28.3828	1.27483	4.04008e-170	1.12369e-168		FAM162A	77.4307	1.57029	0	0		PRKAR2B	37.7401	1.60381	4.56288e-295	1.46425e-293		CCDC112	23.8673	1.23328	7.3815e-118	2.26409e-116		PDE4DIP	26.5528	1.19693	1.37641e-144	3.68698e-143		MDFIC	40.9471	2.73826	0	0		SH3BGRL3	19.3305	0.864913	1.39621e-77	3.73689e-76		TMEM208	8.50016	1.01677	3.73065e-16	2.90041e-15		KIAA1456	13.7876
PON2	28.368	0.836704	2.27231e-170	6.32562e-169		HSP90AB1	77.1184	0.837675	0	0		MKI67	37.7089	3.14931	1.10547e-292	3.50174e-291		MYT1	23.7621	2.19021	1.36127e-116	4.13954e-115		TMEM61	26.4963	1.86813	1.45401e-143	3.87533e-142		GIPR	40.8786	2.44842	0	0		PAK3	19.3063	1.02576	2.35121e-77	6.26663e-76		SYP	8.4998	1.36769	3.74096e-16	2.90771e-15		TAGLN3	13.7833
PTBP3	28.3367	0.78613	5.23907e-170	1.4559e-168		ANGPTL4	76.765	3.28824	0	0		CD24	37.6983	0.52668	1.02582e-298	3.32194e-297		FSD1	23.7457	3.06859	2.7366e-116	8.30604e-115		IRF2BP2	26.4158	0.907169	3.06426e-143	8.14669e-142		PTS	40.7007	1.0888	0	0		GPBAR1	19.2502	2.38437	8.85227e-77	2.34567e-75		RHBDD2	8.49451	1.21594	3.88972e-16	3.0182e-15		MEIS2	13.7819
LRRC16A	28.3216	1.07935	1.43997e-169	3.98771e-168		VMP1	76.7505	1.57344	0	0		TRIP6	37.6493	1.36654	1.37539e-294	4.40042e-293		KDM1A	23.7227	0.916359	1.26993e-116	3.86547e-115		HMGN5	26.4157	1.45497	7.50332e-143	1.98987e-141		CFC1	40.5567	2.69131	0	0		PNMA1	19.1768	1.40185	2.32994e-76	6.13315e-75		FAM46A	8.45708	1.4586	5.11951e-16	3.95132e-15		KIF13B	13.7691
APP	28.2745	0.470863	9.26928e-170	2.5714e-168		MT1M	76.4947	5.7794	0	0		C6	37.5822	2.83727	4.36409e-291	1.37421e-289		DST	23.6801	0.844747	2.19234e-116	6.66046e-115		ANXA7	26.3641	0.9329	9.8705e-143	2.61548e-141		JAKMIP2	40.5141	2.12548	0	0		RP11-423H2.3	19.1666	2.90331	3.77483e-76	9.9039e-75		GNG12	8.43798	2.23343	5.92833e-16	4.55905e-15		MAP2	13.7542
GALR1	28.2706	1.58382	1.60181e-168	4.42055e-167		CEBPD	75.9612	2.4786	0	0		TMEM2	37.5688	1.40679	2.09603e-293	6.65931e-292		LRP12	23.6765	1.67588	6.16336e-116	1.85657e-114		CLEC11A	26.3354	1.50881	4.28543e-142	1.12992e-140		DACH1	40.4578	1.72799	0	0		ST8SIA3	19.1531	2.10629	4.16981e-76	1.09312e-74		NIPSNAP3A	8.42356	1.50074	6.54262e-16	5.01816e-15		NDUFA12	13.6812
EHF	28.2531	0.988885	5.66078e-169	1.56492e-167		LDHA	75.7818	1.93128	0	0		MYH10	37.5679	0.824156	9.22187e-295	2.9534e-293		GABRB3	23.6593	1.35663	5.84119e-116	1.76285e-114		GUK1	26.1891	0.699511	2.40564e-141	6.3064e-140		SLC7A2	40.4523	1.03644	0	0		TSC22D1	19.0018	0.669432	3.13369e-75	8.12825e-74		PCBD1	8.38327	0.644897	8.6438e-16	6.60278e-15		DPP7	13.6513
ADCY6	28.2406	1.26114	1.85854e-168	5.12021e-167		RPL38	75.7765	0.82178	0	0		LMCD1	37.5275	1.38862	9.19422e-293	2.91531e-291		DTD1	23.4556	1.04212	3.07238e-114	9.16832e-113		KIF1A	26.1741	1.11066	7.94437e-141	2.07242e-139		C14orf132	40.4077	1.66885	0	0		STMN3	18.9738	1.48798	7.02125e-75	1.81676e-73		TCEAL3	8.37261	1.20119	9.42646e-16	7.18861e-15		HAGH	13.5857
RALGPS2	28.2115	0.905685	1.77215e-168	4.88643e-167		BTF3	75.7186	0.743835	0	0		EFEMP2	37.3995	1.24816	3.38742e-291	1.06772e-289		PTTG1IP	23.4459	0.699469	2.3534e-114	7.02939e-113		KCNK17	26.1583	2.0722	3.349e-140	8.70795e-139		RIMS2	40.3529	1.9165	0	0		CD200	18.9512	1.37493	9.44462e-75	2.43789e-73		PRKACB	8.36587	1.6125	9.9552e-16	7.57734e-15		CACNA1C	13.5459
RAD23B	28.205	0.618312	9.95502e-169	2.74969e-167		IDI1	75.6434	1.65372	0	0		DEPTOR	37.3522	1.29837	2.70855e-290	8.49549e-289		CYTH2	23.4441	0.996937	4.08251e-114	1.21486e-112		MEIS2	26.1494	0.826778	7.25199e-141	1.89334e-139		CDIP1	40.3118	1.81526	0	0		PLAC9	18.9441	3.20662	1.54194e-74	3.97049e-73		RBX1	8.3204	0.786895	1.367e-15	1.03212e-14		DPYSL2	13.5361
DDX6	28.1635	0.625258	2.85476e-168	7.85798e-167		AC011298.2	75.2338	4.80186	0	0		GAS6	37.3389	2.87836	1.16336e-287	3.62402e-286		C11orf58	23.4071	0.480451	3.16357e-114	9.43165e-113		SMIM6	26.1418	1.23761	2.27801e-140	5.92803e-139		KIAA2022	40.2795	2.34924	0	0		RUNDC3A	18.9027	1.55252	2.18928e-74	5.6238e-73		MLLT11	8.31934	1.60258	1.38966e-15	1.04824e-14		NAP1L5	13.5179
CSPP1	28.1566	0.910057	7.76545e-168	2.13199e-166		MKNK1	75.1666	2.06553	0	0		NEDD9	37.3292	1.51845	2.42828e-289	7.59402e-288		CCT7	23.3258	0.666905	2.86679e-113	8.50711e-112		PLPPR5	26.1106	1.63902	6.56438e-140	1.7013e-138		LMO3	40.1978	2.44061	0	0		TBCC	18.8409	1.01988	5.23038e-74	1.33926e-72		HMGN5	8.3109	1.50072	1.47723e-15	1.11297e-14		CTD-2314G24.2	13.4923
ARHGAP24	28.0942	1.28822	7.75393e-167	2.10888e-165		HHIP	74.8158	4.92743	0	0		UPK1B	37.3215	3.72065	9.49668e-287	2.9497e-285		DNAJC12	23.3066	1.03234	5.15901e-113	1.52525e-111		FOXO1	26.1018	1.36918	6.46131e-140	1.67595e-138		RTN1	40.1711	1.76074	0	0		MEAF6	18.7484	0.726123	1.78133e-73	4.5357e-72		REEP5	8.30759	0.917833	1.50336e-15	1.1324e-14		GRIA2	13.4909
RHOU	28.0836	1.50395	1.89375e-166	5.14618e-165		PRELID1	74.6875	1.42637	0	0		IGF2BP1	37.2932	1.21783	1.31852e-289	4.12749e-288		STMN3	23.2956	1.3505	1.08555e-112	3.20348e-111		PSD	26.0855	1.84572	1.60361e-139	4.14601e-138		NISCH	40.1519	1.45329	0	0		MIEN1	18.7379	0.822419	2.44975e-73	6.2228e-72		ZNHIT1	8.28197	0.762838	1.80022e-15	1.35217e-14		DDX24	13.4612
HES1	28.0672	0.819272	2.61687e-167	7.15384e-166		LDLR	74.5128	2.37972	0	0		ANXA5	37.2767	0.550232	3.04293e-292	9.61988e-291		TSPAN5	23.2313	1.34365	4.39908e-112	1.29459e-110		TMED8	25.8358	1.49194	3.41373e-137	8.76914e-136		PPP1R1A	40.1457	1.92114	0	0		ATP6V1G1	18.7293	0.50111	2.13357e-73	5.42396e-72		COX4I1	8.26746	0.443726	1.97168e-15	1.47714e-14		EID1	13.4528
NR6A1	28.0591	1.25245	2.41842e-166	6.56634e-165		SERPINA1	74.2341	1.40941	0	0		RP11-295M3.4	37.2186	4.25559	3.44004e-285	1.06126e-283		MAP1A	23.192	1.61591	1.1863e-111	3.47192e-110		DPP6	25.777	1.41139	1.08684e-136	2.78291e-135		DDC	40.0463	1.85639	0	0		NAP1L5	18.7094	1.54996	5.36934e-73	1.36174e-71		PLIN3	8.25883	1.25015	2.14347e-15	1.60246e-14		PLXNC1	13.4115
ZNF431	28.0122	0.904175	3.94992e-166	1.07155e-164		MAFF	74.2336	2.30928	0	0		NUSAP1	37.2148	2.56179	4.45894e-286	1.38361e-284		UBE2I	23.1702	0.63394	6.33481e-112	1.86081e-110		SLC7A14	25.7512	2.92305	5.7443e-136	1.4685e-134		C1QTNF4	40.0086	1.56974	0	0		BTG3	18.6925	1.13609	6.39889e-73	1.62027e-71		PEG10	8.23742	0.977038	2.48522e-15	1.85448e-14		ATP6AP1	13.4049
KIAA1462	28.0032	1.63951	1.91672e-165	5.18211e-164		SQSTM1	73.9983	1.75105	0	0		PRSS22	37.1003	1.87774	2.26641e-285	7.00548e-284		CNOT7	23.1261	0.698255	1.78818e-111	5.22862e-110		DCC	25.6956	2.30973	1.61677e-135	4.11342e-134		RIC3	39.9499	1.33097	0	0		ARF5	18.6811	0.779304	6.50271e-73	1.64526e-71		LAMTOR4	8.22266	0.787837	2.75685e-15	2.05141e-14		PNMA2	13.378
SEPW1	27.9995	0.423099	5.72558e-167	1.55988e-165		MT-ND4L	73.9731	1.21359	0	0		C9orf116	37.0584	1.46357	1.55669e-285	4.82105e-284		RGS17	23.0768	1.39057	9.31006e-111	2.70738e-109		MAGI2	25.6771	1.89925	1.86382e-135	4.7382e-134		DYNLT3	39.8916	1.32413	0	0		UPF3A	18.6416	0.778591	1.27927e-72	3.21631e-71		ATP5J2	8.21693	0.725462	2.86588e-15	2.13006e-14		TNFRSF21	13.3508
FREM1	27.9572	1.50369	4.93932e-165	1.33203e-163		ELN	73.5948	4.7792	0	0		S100A16	37.0538	0.960922	4.91699e-287	1.52872e-285		NARF	23.0328	0.911266	1.60282e-110	4.65678e-109		TTLL7	25.599	1.15719	4.63902e-135	1.17465e-133		F10	39.6986	1.4194	0	0		TNFRSF21	18.6386	1.53537	1.73427e-72	4.34655e-71		FLYWCH2	8.20796	1.44312	3.08973e-15	2.29164e-14		GNAI2	13.3439
SVIL	27.9385	0.949116	2.45264e-165	6.62545e-164		NPC2	73.5778	1.24617	0	0		HHEX	37.0323	1.0468	3.50853e-287	1.09188e-285		SERINC2	22.9806	1.5635	8.9665e-110	2.58394e-108		RAP1GAP2	25.5549	1.29437	1.47446e-134	3.71583e-133		LMO1	39.6176	3.14539	0	0		ABCC8	18.6348	1.16416	1.57462e-72	3.95576e-71		TCEAL5	8.19732	2.04271	3.34388e-15	2.47554e-14		CPEB4	13.3422
CGN	27.9108	1.19851	9.44089e-165	2.54172e-163		COX4I1	73.4637	0.691165	0	0		CFAP221	37.0153	2.03359	8.35359e-284	2.56225e-282		HNRNPA3	22.9207	0.457803	6.28192e-110	1.81522e-108		LRPAP1	25.5516	0.715394	6.52073e-135	1.64851e-133		DDR1	39.6098	1.20074	0	0		PFKP	18.6263	2.04146	2.38906e-72	5.97827e-71		S100A6	8.16265	0.925053	4.20764e-15	3.09776e-14		GNB2	13.3025
TPR	27.8773	0.517715	3.42424e-165	9.24226e-164		SPCS3	73.342	1.34405	0	0		HMGB3	36.9855	0.933198	7.61965e-286	2.36209e-284		VBP1	22.8955	0.808742	2.30168e-109	6.61501e-108		HMP19	25.5235	2.93306	7.89759e-134	1.97936e-132		PEX5L	39.6048	3.11634	0	0		MCC	18.6213	2.43995	2.7651e-72	6.90843e-71		MAP1B	8.15639	1.01095	4.38605e-15	3.22539e-14		TMEM61	13.2816
CAMK1D	27.8702	1.20201	1.92254e-164	5.16723e-163		MCL1	72.906	1.34033	0	0		PDE1C	36.8942	2.2305	5.02105e-282	1.52542e-280		HMGB1	22.8806	0.352332	7.52447e-110	2.17034e-108		H2AFY	25.4976	0.766864	2.33543e-134	5.88094e-133		PDZD2	39.568	2.93983	0	0		RAB26	18.6153	1.33772	2.24502e-72	5.62222e-71		DDC	8.12235	1.7886	5.68411e-15	4.15508e-14		NLRP1	13.2457
TCHP	27.8683	1.08575	2.22394e-164	5.97229e-163		F3	72.851	1.96982	0	0		EPB41L2	36.8695	1.47732	6.0034e-283	1.83434e-281		KIAA2022	22.8232	1.81981	2.696e-108	7.67231e-107		NANOS1	25.4578	2.16802	2.85422e-133	7.13666e-132		HOPX	39.4885	2.62347	0	0		PAPPA2	18.5564	4.44662	9.36216e-72	2.32996e-70		PDE4DIP	8.12205	1.25555	5.65807e-15	4.13983e-14		TCEAL7	13.2334
FBN3	27.8602	1.76905	9.27913e-164	2.48768e-162		RPS21	72.8145	0.943794	0	0		ART3	36.8064	3.04251	1.03353e-279	3.11916e-278		KDM5B	22.6897	0.772509	1.64953e-107	4.67757e-106		VWA5B2	25.4535	1.49457	1.57334e-133	3.93705e-132		MMP23B	39.4371	3.27615	0	0		WNT4	18.507	1.98199	1.64688e-71	4.09221e-70		SNU13	8.11293	0.693698	6.00186e-15	4.38233e-14		PODXL2	13.2065
FZD2	27.8367	1.57965	1.17624e-163	3.15079e-162		CNPY1	72.4478	6.67828	0	0		NUAK2	36.7742	2.38441	6.25736e-280	1.89023e-278		DDA1	22.6404	1.09082	5.63435e-107	1.59208e-105		TBCA	25.4481	0.535833	4.19051e-134	1.05108e-132		SPEG	39.1661	3.26492	0	0		CSTB	18.4883	0.688025	1.43961e-71	3.57996e-70		RAB1A	8.10662	0.861903	6.29515e-15	4.59438e-14		ABCA5	13.2013
NEXN	27.7905	1.16633	1.34838e-163	3.60281e-162		ECI2	72.4278	1.29579	0	0		TSPAN8	36.7437	3.03662	1.00207e-278	3.01565e-277		ASNS	22.6158	1.47406	1.24366e-106	3.50487e-105		ALCAM	25.3274	1.26838	2.4194e-132	6.03056e-131		SSC5D	39.0894	4.29052	0	0		C1QTNF4	18.4279	1.31259	5.01155e-71	1.23662e-69		SMPD1	8.1061	1.6426	6.37351e-15	4.6505e-14		PFKL	13.1995
ITGA6	27.7269	1.04522	5.41626e-163	1.44479e-161		MYC	72.1269	3.18639	0	0		LMO7	36.7334	1.0465	1.21164e-281	3.67753e-280		PBRM1	22.5822	0.822587	1.51361e-106	4.25438e-105		SLC25A4	25.2914	0.874884	2.82499e-132	7.03055e-131		PDLIM4	39.0174	1.3274	0	0		KCNJ3	18.4162	2.80741	7.8618e-71	1.93247e-69		MAF	8.09077	2.65492	7.14111e-15	5.18807e-14		GATA6-AS1	13.182
ZNF83	27.7135	0.974631	7.85665e-163	2.09227e-161		MT-ND3	72.0486	1.14738	0	0		COL9A1	36.7231	4.05071	3.31092e-278	9.94522e-277		CTD-2545M3.8	22.5746	5.45579	7.76744e-106	2.17939e-104		SESN3	25.2749	1.13248	6.54177e-132	1.62173e-130		COX17	38.9923	0.89195	0	0		SYT11	18.3131	1.60239	3.36347e-70	8.19813e-69		COPE	8.08886	0.697226	7.12148e-15	5.17499e-14		SMIM6	13.1741
GPC3	27.682	1.21743	3.54948e-162	9.43672e-161		RNF181	71.7044	1.52559	0	0		SMC4	36.6727	1.47363	1.10163e-279	3.32153e-278		SNRPN	22.5672	0.552178	1.2378e-106	3.49144e-105		UCHL1	25.219	0.947067	5.70423e-132	1.4152e-130		TSPAN3	38.9121	0.719707	0	0		CPLX2	18.3116	3.17992	4.53777e-70	1.10351e-68		TM2D3	8.07736	1.25278	7.78489e-15	5.6455e-14		ATP9A	13.1627
RPS20	27.4997	0.325728	2.74028e-161	7.25515e-160		HM13	71.4542	1.36801	0	0		MCM4	36.5797	1.85167	7.32958e-278	2.19338e-276		MAP4K4	22.4964	0.881055	9.05442e-106	2.53826e-104		UNC80	25.2186	1.31918	2.68897e-131	6.65057e-130		CYYR1	38.843	2.12697	0	9.47537e-308		ATP6AP1	18.2957	0.898266	3.60148e-70	8.77156e-69		SLC29A1	8.07424	1.3329	7.9515e-15	5.76371e-14		PRKCE	13.1466
CGNL1	27.4807	1.10675	4.19899e-160	1.10258e-158		SEC11C	71.3406	0.96018	0	0		SERPINA5	36.5503	1.53973	5.95978e-278	1.78682e-276		CRMP1	22.4704	1.21831	1.71293e-105	4.78931e-104		DST	25.0805	0.886665	2.77173e-130	6.81827e-129		AGPAT2	38.8011	1.11142	0	0		CYSTM1	18.2715	0.768486	4.79445e-70	1.16416e-68		HSD17B14	8.06741	1.98091	8.39738e-15	6.0745e-14		GFOD2	13.1446
PIP5K1B	27.4524	1.89951	2.68571e-159	6.99468e-158		DNASE1	71.2179	2.34707	0	0		PTTG1	36.4487	1.86335	6.97462e-276	2.07549e-274		AGO1	22.4243	1.36038	6.27274e-105	1.7462e-103		CACNA1C	25.018	2.47749	5.10931e-129	1.2425e-127		AIP	38.793	1.12004	0	0		ZNF428	18.2107	0.69818	1.28951e-69	3.10982e-68		ACLY	8.04293	1.16505	9.90831e-15	7.13192e-14		GNB1	13.1212
SMIM14	27.4327	0.639784	4.53219e-160	1.18909e-158		HSPH1	71.1696	1.73373	0	0		PTGR1	36.2419	0.886578	2.76381e-275	8.20153e-274		MIR7-3HG	22.4177	1.06279	3.72654e-105	1.04011e-103		RBMX2	24.9698	1.17654	6.87011e-129	1.66943e-127		CCDC67	38.7475	2.7998	2.21124e-307	6.12358e-306		MAN1A1	18.2105	0.890012	1.24651e-69	3.0084e-68		AKR1B1	8.03506	1.39906	1.0501e-14	7.54391e-14		MSRB2	13.0797
PIK3R1	27.4021	0.95361	2.4631e-159	6.42014e-158		PHGDH	70.4521	1.21946	0	0		RIPK2	36.1516	1.70218	4.31978e-272	1.27242e-270		TPST2	22.4152	1.85433	9.48416e-105	2.63559e-103		TMX4	24.9573	1.13921	7.07376e-129	1.71761e-127		STXBP1	38.6926	1.42597	0	2.8063e-307		STXBP5L	18.2104	2.39517	2.11074e-69	5.06736e-68		TUBA4A	8.0178	1.20853	1.17976e-14	8.45563e-14		EIF1B	13.0606
PARP14	27.3564	1.32114	1.65349e-158	4.28539e-157		FAM129A	70.3712	4.22613	0	0		CENPU	36.1253	2.37627	8.01673e-271	2.3527e-269		ETV1	22.3641	1.79944	2.35828e-104	6.52513e-103		AES	24.9559	0.672725	3.2525e-129	7.93371e-128		RRAGD	38.6719	1.80147	1.85437e-307	5.13977e-306		MTURN	18.2072	1.50171	1.87435e-69	4.50663e-68		RAB3C	8.00912	1.54584	1.25985e-14	9.01951e-14		FOXN3	13.0033
PRDX6	27.3337	0.446428	2.06027e-159	5.37895e-158		G0S2	69.9697	2.01768	0	0		COBL	36.1087	1.13125	1.38798e-272	4.09594e-271		FNDC5	22.3558	1.88615	3.21438e-104	8.8708e-103		HSBP1	24.8999	0.584185	1.02003e-128	2.46926e-127		RUFY3	38.6366	1.23333	3.85917e-308	1.07337e-306		KIF1A	18.1852	0.96904	2.02166e-69	4.85716e-68		RABAC1	7.97691	0.719246	1.56281e-14	1.11286e-13		OPTN	12.9741
SATB1	27.3029	0.899382	2.53187e-158	6.55657e-157		DHRS7	69.9252	1.22854	0	0		LATS2	36.0434	2.1165	6.66833e-270	1.94625e-268		HIST3H2A	22.3387	0.985553	2.19898e-104	6.08964e-103		FKBP1B	24.8792	1.44684	5.2613e-128	1.26596e-126		A1BG	38.6321	2.13737	1.60992e-306	4.45449e-305		RPAIN	18.162	0.721603	2.80151e-69	6.70055e-68		PPP2R1A	7.97492	0.919261	1.59192e-14	1.13333e-13		DYNLT1	12.9023
SLIT3	27.2543	0.957185	9.14727e-158	2.36114e-156		KRT8	69.9005	0.86459	0	0		HNMT	36.0255	1.41375	1.12309e-270	3.28692e-269		NAE1	22.3261	0.888665	2.64967e-104	7.32503e-103		IGSF1	24.8419	1.76464	1.38551e-127	3.32376e-126		GRM4	38.4691	4.03177	1.36621e-302	3.71577e-301		ELAVL4	18.1556	1.19157	3.53016e-69	8.41809e-68		TMEM230	7.95923	0.786951	1.77108e-14	1.25808e-13		MYL6B	12.8667
SPHK1	27.2073	2.06907	2.10532e-156	5.39943e-155		STXBP6	69.8856	3.39293	0	0		ANXA11	36.0173	0.928797	5.81098e-272	1.70852e-270		PTPRN	22.2822	1.04666	5.6415e-104	1.55555e-102		PPP3CA	24.8101	1.33058	2.32052e-127	5.55845e-126		PIPOX	38.3562	2.26246	3.47491e-302	9.42682e-301		FAM174A	18.1369	1.17005	5.14473e-69	1.22317e-67		MLXIPL	7.9558	1.47793	1.82713e-14	1.29645e-13		ST8SIA3	12.8504
GOLGA8A	27.194	0.961196	4.86518e-157	1.2538e-155		C19orf48	69.6867	1.75433	0	0		FBLN1	35.9733	2.04423	2.46371e-269	7.17102e-268		LINC00643	22.2787	1.14389	6.09521e-104	1.67921e-102		MARCKS	24.7879	0.636371	1.1202e-127	2.68932e-126		TCF4	38.3415	1.34527	2.24299e-303	6.12127e-302		SLC8A1	18.1361	2.45663	6.79487e-69	1.61309e-67		SYT17	7.92822	1.98059	2.22365e-14	1.56978e-13		RPS6KA3	12.8504
TAF15	27.1743	0.660372	4.3461e-157	1.12093e-155		ECE1	69.5581	1.66884	0	0		MYO10	35.9256	0.866903	9.93974e-271	2.91171e-269		LDLRAP1	22.2576	1.48861	1.62162e-103	4.45596e-102		WNT4	24.709	2.04728	3.2816e-126	7.79624e-125		RFX6	38.2629	1.53442	1.22769e-302	3.34188e-301		MAP9	18.1332	0.804172	4.73905e-69	1.1284e-67		CACNA2D2	7.877	2.66678	3.18414e-14	2.22911e-13		GC	12.812
ERBB2IP	27.1504	0.901006	1.22036e-156	3.13735e-155		ZFP36	69.3502	2.06897	0	0		C1orf21	35.8727	1.86086	8.43478e-268	2.43731e-266		WNK3	22.256	1.33438	1.72155e-103	4.72649e-102		PDLIM4	24.6855	1.16545	2.47983e-126	5.90462e-125		PSMB5	38.1824	0.654501	3.50517e-303	9.54951e-302		PSD	18.1165	1.64193	8.08262e-69	1.91311e-67		YIF1A	7.86842	0.894181	3.33725e-14	2.33527e-13		PRUNE2	12.7975
CBX2	27.1125	1.74611	1.61626e-155	4.12527e-154		ELF3	69.2576	1.55917	0	0		CHD3	35.8689	0.970287	1.246e-269	3.63001e-268		DYNLL1	22.2473	0.424729	6.83311e-104	1.88087e-102		RUNDC3A	24.6142	1.62947	1.88228e-125	4.45525e-124		CACNA1A	38.1106	1.66007	6.38407e-300	1.72165e-298		TSPAN3	18.0536	0.623196	1.53252e-68	3.62201e-67		KLRC2	7.84983	4.92073	3.85365e-14	2.68779e-13		NECAB2	12.7717
SHANK2	27.0896	1.32364	1.201e-155	3.06782e-154		TMEM97	69.2434	1.5685	0	0		FN1	35.8654	1.50445	1.00313e-268	2.91446e-267		SMARCB1	22.2084	0.851104	2.83945e-103	7.75566e-102		PRMT2	24.5643	0.842918	2.55829e-125	6.04187e-124		RAD21	38.0906	0.792343	3.00943e-301	8.15023e-300		SLC26A4	18.05	2.56605	2.74375e-68	6.46553e-67		TMEM190	7.77228	1.61936	6.50967e-14	4.48154e-13		STMN1	12.7274
SIPA1L1	27.0833	0.902197	7.98183e-156	2.04215e-154		PTMA	69.2084	0.477911	0	0		ASAP2	35.7982	1.44936	1.60302e-267	4.61538e-266		ANKRD65	22.2064	0.886893	2.59151e-103	7.09665e-102		GPC5-AS1	24.5356	4.03014	2.59813e-124	6.11787e-123		VWA5B2	38.0887	1.60096	1.39025e-299	3.74606e-298		ETV1	18.0447	1.88535	2.7015e-68	6.37068e-67		POLR2K	7.72803	0.958106	8.79218e-14	6.01016e-13		IQSEC3	12.7195
GCC2	27.0363	0.532902	9.64782e-156	2.46641e-154		ATRAID	69.2037	1.08495	0	0		SKA2	35.7573	1.13938	1.049e-267	3.02571e-266		NRXN1	22.2052	0.986432	2.21701e-103	6.07633e-102		ENO2	24.533	1.88401	1.3682e-124	3.22887e-123		TENM3	37.8837	1.91296	9.68031e-296	2.57362e-294		PRUNE2	18.0243	2.43655	4.10455e-68	9.66506e-67		TCEAL8	7.71886	0.793704	9.33049e-14	6.36859e-13		BTBD17	12.7083
RCC2	26.9925	1.11558	1.31243e-154	3.32059e-153		RPS10	69.0709	0.792859	0	0		AQP1	35.7138	3.12729	2.56668e-264	7.2913e-263		FAM127B	22.1849	0.836825	4.03973e-103	1.10153e-101		TUBA1B	24.5176	0.675257	2.04755e-125	4.84283e-124		PCDH7	37.8762	4.01051	7.87172e-294	2.08066e-292		AMPH	18.0042	3.5935	6.23669e-68	1.4664e-66		ASPHD1	7.70803	2.25174	1.01603e-13	6.92169e-13		RP11-386G11.5	12.7006
HNF1B	26.9625	1.13699	2.4255e-154	6.12706e-153		PDIA4	69.0486	1.24853	0	0		FAT1	35.6315	0.903401	1.56865e-266	4.50421e-265		SEPT3	22.1697	2.43022	1.50943e-102	4.10179e-101		ATP6AP1	24.4683	0.941693	2.42573e-124	5.72035e-123		PFKFB2	37.7932	2.9533	3.0496e-293	8.04078e-292		SLC22A17	17.9808	1.28438	6.30322e-68	1.48096e-66		VPS28	7.69466	0.704627	1.10005e-13	7.48449e-13		ABCC9	12.6476
ODC1	26.9569	0.592587	7.77372e-155	1.97309e-153		SLC39A14	69.0358	2.26667	0	0		WTIP	35.626	2.06366	3.15727e-264	8.96102e-263		ONECUT2	22.1374	2.83997	2.97595e-102	8.06639e-101		HLA-A	24.3935	0.86507	1.14322e-123	2.68207e-122		GDI1	37.7801	1.16199	5.35346e-296	1.42447e-294		VEGFB	17.9231	0.936884	1.46476e-67	3.43391e-66		GPX1	7.65875	0.729417	1.40491e-13	9.50598e-13		RIPPLY3	12.6328
TMEM2	26.9535	1.12787	3.06005e-154	7.72392e-153		CIB1	68.8273	1.59835	0	0		ARHGAP29	35.6169	1.71265	1.32487e-264	3.77034e-263		CELF4	22.1046	1.13172	2.2568e-102	6.12233e-101		SCP2	24.3827	0.722102	9.41843e-124	2.21125e-122		ARL4D	37.7511	1.71679	9.70167e-294	2.56224e-292		GNAI2	17.9074	0.698078	1.59744e-67	3.74221e-66		PLEKHB1	7.64722	1.36325	1.52787e-13	1.03161e-12		PROC	12.6292
BTG1	26.9387	0.491887	5.80022e-155	1.47336e-153		SIL1	68.4102	1.6303	0	0		ANXA13	35.599	3.6017	1.35106e-262	3.81765e-261		STRN4	22.0995	1.36763	3.61908e-102	9.80128e-101		ANKH	24.3593	2.14333	6.97895e-123	1.63012e-121		VIL1	37.747	1.06966	1.83559e-295	4.87202e-294		DOK6	17.8842	2.11356	3.66327e-67	8.52538e-66		AP1S1	7.60756	0.965533	1.9949e-13	1.33958e-12		SLC17A5	12.6267
PRRC2B	26.9337	0.676262	1.85888e-154	4.69945e-153		MZT2B	68.3412	1.06923	0	0		ARMCX6	35.5961	0.965946	1.63367e-265	4.66994e-264		KLHDC8B	22.0814	1.03105	4.01863e-102	1.08741e-100		NDUFB8	24.2812	0.59513	8.28076e-123	1.92996e-121		CDK5R1	37.735	2.39728	8.65014e-293	2.27699e-291		FSTL5	17.8786	2.21884	3.89828e-67	9.05911e-66		RAB18	7.58715	1.12529	2.29352e-13	1.53398e-12		JAKMIP2	12.6114
HP1BP3	26.8396	0.56057	1.61731e-153	4.06619e-152		SPINT2	68.1412	0.761392	0	0		LAD1	35.5017	1.83877	1.0412e-262	2.94467e-261		USP18	22.0573	1.86414	1.43199e-101	3.85526e-100		FKBP2	24.2603	0.539863	7.67954e-123	1.79245e-121		CALM2	37.721	0.559901	3.75543e-297	1.00344e-295		TBCB	17.8696	0.725255	2.69586e-67	6.28313e-66		FGFR1	7.57788	1.19559	2.44185e-13	1.63079e-12		TTR	12.5733
EIF4G2	26.8253	0.428081	1.61402e-153	4.06391e-152		BCAP31	68.0141	1.23674	0	0		TYMS	35.5003	2.30256	3.75779e-262	1.05715e-260		EID1	22.018	0.416523	5.40288e-102	1.46075e-100		RNF150	24.2498	2.06124	7.55358e-122	1.75153e-120		MAPK8IP1	37.6485	1.55992	9.25099e-293	2.43315e-291		WDR54	17.8444	1.17372	5.55541e-67	1.28819e-65		PARM1	7.57069	3.34458	2.58405e-13	1.72396e-12		SERINC1	12.5732
DBN1	26.7807	0.687706	6.27287e-153	1.57587e-151		ERI3	67.8979	1.37655	0	0		CXCL3	35.4937	1.92763	1.81354e-262	5.11993e-261		SSBP4	22.0128	0.788027	1.07744e-101	2.90317e-100		TTC3	24.2138	0.569807	2.75441e-122	6.41024e-121		LAGE3	37.5058	1.0857	1.46738e-291	3.83102e-290		A1BG	17.8098	1.68576	1.0543e-66	2.4306e-65		C1D	7.56588	1.07308	2.64719e-13	1.76424e-12		CBX6	12.5699
SPIDR	26.7526	1.08844	4.5005e-152	1.12266e-150		SPOCK1	67.7339	3.37952	0	0		UBE2C	35.4255	2.83943	1.43466e-260	4.01128e-259		RALGDS	22.0119	1.22509	1.80408e-101	4.85292e-100		SH3BGRL3	24.1388	0.831565	2.49249e-121	5.77543e-120		MYT1L	37.4853	2.44356	2.29539e-289	5.94902e-288		CBFB	17.7937	1.61572	1.38954e-66	3.19194e-65		ABCA5	7.56199	1.00938	2.70901e-13	1.80507e-12		TMEM47	12.5672
SORD	26.7479	0.857278	3.305e-152	8.25088e-151		HMGCS1	67.5476	1.72774	0	0		SOX11	35.4083	1.27117	2.36839e-262	6.68044e-261		C14orf132	22.0026	1.22497	1.978e-101	5.3163e-100		MAN1A1	24.0575	0.905068	1.0304e-120	2.37378e-119		ACAP3	37.4436	2.03441	4.49976e-289	1.16527e-287		DYNLL1	17.7901	0.437544	8.98344e-67	2.07705e-65		FAM174A	7.5161	1.2659	3.69641e-13	2.44209e-12		SLC7A14	12.5625
MCL1	26.7311	0.55941	1.09618e-152	2.74735e-151		TUBB4B	67.5109	1.08932	0	0		PPFIBP1	35.3915	1.1232	2.69143e-262	7.57824e-261		MALAT1	21.9831	0.414502	8.02638e-102	2.16638e-100		MAP6	24.0357	1.55358	4.30564e-120	9.89057e-119		VLDLR	37.3669	2.03084	3.89805e-288	1.00618e-286		C12orf75	17.7701	0.895225	1.528e-66	3.50244e-65		HBA2	7.51219	1.67379	3.7999e-13	2.50839e-12		VAT1	12.5603
SRRM2	26.7155	0.47574	2.79463e-152	6.98221e-151		TPRN	67.4129	2.57279	0	0		PAFAH1B3	35.3316	0.693312	7.50473e-263	2.12623e-261		HSPA2	21.9443	1.90968	1.05943e-100	2.81661e-99		CACNA2D2	24.0181	2.40138	1.11057e-119	2.54381e-118		SOCS2	37.329	3.18261	2.21285e-286	5.66156e-285		PDE8B	17.7697	1.29456	1.85645e-66	4.24312e-65		TAGLN2	7.49638	0.846672	4.19708e-13	2.76087e-12		CMAS	12.542
ROR1	26.7108	1.25408	1.51954e-151	3.76406e-150		COL21A1	67.4029	3.47399	0	0		OSBPL9	35.3074	0.956959	1.47879e-261	4.14555e-260		CSNK1A1	21.9262	0.536968	4.12896e-101	1.10417e-99		BAMBI	23.9659	1.97704	2.65809e-119	6.07537e-118		INA	37.3204	2.4474	5.09905e-287	1.30984e-285		BASP1	17.7642	1.13167	1.82038e-66	4.16665e-65		LDOC1	7.49259	1.16518	4.32627e-13	2.84293e-12		NAP1L3	12.5364
CEBPB	26.6937	0.850595	8.44098e-152	2.09907e-150		CHMP2B	66.7178	1.3961	0	0		LARGE	35.2695	1.48799	7.13955e-260	1.99097e-258		SHTN1	21.903	0.906918	1.27619e-100	3.38727e-99		PLPPR2	23.9632	2.27234	3.37247e-119	7.69713e-118		RAB26	37.2822	1.50888	4.49776e-288	1.16004e-286		MALAT1	17.7465	0.370521	1.03614e-66	2.39219e-65		PFDN2	7.47867	0.847936	4.73713e-13	3.10397e-12		UCP2	12.527
VGLL4	26.6874	0.737026	8.18542e-152	2.0371e-150		NFKBIZ	66.4055	2.04324	0	0		CENPK	35.2457	2.31891	8.29451e-259	2.297e-257		RBBP4	21.9007	0.62105	8.15994e-101	2.17122e-99		SLC12A5	23.9521	1.88395	3.48845e-119	7.95615e-118		RNF8	37.2331	1.20017	2.44308e-287	6.28079e-286		AP2M1	17.7112	0.636259	3.58934e-66	8.16875e-65		RAP1GAP2	7.45048	1.38146	5.74414e-13	3.74613e-12		ROBO1	12.4911
NKAIN3	26.6262	3.24311	7.91433e-150	1.93792e-148		ALKBH7	66.3527	0.964423	0	0		DZIP1L	35.2399	2.39657	2.29597e-258	6.34723e-257		DPYSL3	21.887	2.01974	2.89589e-100	7.63549e-99		ST8SIA3	23.8817	2.07784	1.68953e-118	3.83144e-117		DCDC1	37.2273	1.90354	1.93024e-286	4.94247e-285		SCRN1	17.6997	1.18617	5.2593e-66	1.19438e-64		SORBS2	7.44517	0.858701	5.92263e-13	3.86017e-12		RP11-136K7.2	12.4767
STK17A	26.6219	0.919311	6.10051e-151	1.50416e-149		THBS1	66.061	2.24703	0	0		RP11-680F8.1	35.2312	1.61162	3.99968e-259	1.11149e-257		FXYD6	21.869	0.919897	1.78449e-100	4.72069e-99		ST6GALNAC5	23.8713	1.62281	1.54025e-118	3.49789e-117		PCP4	37.1965	1.45642	1.04137e-287	2.68368e-286		PPFIA2	17.6748	3.64699	1.12464e-65	2.54499e-64		ARPC5	7.44253	0.769463	6.01871e-13	3.91959e-12		PTCHD4	12.4678
CHRDL1	26.6178	1.90006	3.52784e-150	8.65825e-149		QSOX1	65.7099	1.47204	0	0		PCDH17	35.178	1.20403	5.13941e-259	1.42573e-257		RNF146	21.8613	1.03723	2.90447e-100	7.6518e-99		GABRB3	23.8145	1.36192	3.87477e-118	8.76215e-117		PTMS	37.1012	0.780567	1.81473e-287	4.67294e-286		PSMB5	17.613	0.570628	1.64039e-65	3.70161e-64		SERPINE2	7.43457	1.83894	6.39586e-13	4.16096e-12		SPTAN1	12.4289
NFKBIA	26.5442	0.824223	4.42026e-150	1.08402e-148		KIRREL2	65.6476	1.88821	0	0		CDH2	35.1275	2.12862	5.29258e-257	1.45432e-255		GTF2A2	21.848	0.666751	2.39344e-100	6.32638e-99		STXBP1	23.7968	1.2225	5.32247e-118	1.20104e-116		MED27	37.095	1.49796	1.09697e-284	2.7954e-283		SCARB2	17.5325	0.834785	6.62854e-65	1.4863e-63		CD59	7.42015	0.765819	6.98625e-13	4.53304e-12		PLAC8	12.4266
RP11-2E11.9	26.5086	1.6658	4.31773e-149	1.05482e-147		RPL36A	65.5194	0.996502	0	0		FZD5	35.1243	2.05515	4.39684e-257	1.20922e-255		MAD1L1	21.8441	1.50949	6.27458e-100	1.65031e-98		MLLT11	23.776	1.35811	9.10691e-118	2.05211e-116		SCRN1	37.0691	1.3897	8.07735e-285	2.05998e-283		NDUFAF3	17.503	0.716296	9.57736e-65	2.146e-63		RPL21	7.40386	0.307714	7.58126e-13	4.90814e-12		ATP1B2	12.42
CAPRIN1	26.4666	0.659853	2.26609e-149	5.54454e-148		FOS	65.4316	1.26351	0	0		DCBLD2	35.055	1.30371	2.39376e-257	6.59471e-256		CASC15	21.8244	2.66705	1.48371e-99	3.88e-98		NAV1	23.7722	1.23309	9.97e-118	2.24501e-116		FAM222A	36.9971	1.99127	1.27322e-282	3.23162e-281		PDLIM1	17.496	1.398	1.31823e-64	2.94755e-63		SCOC	7.3907	0.704362	8.48022e-13	5.47349e-12		EPB41L2	12.3653
TTC21B	26.4402	1.05228	1.00444e-148	2.44636e-147		CLDN10	65.229	1.10358	0	0		LRRIQ1	35.0135	1.50914	2.71299e-256	7.44207e-255		MSI1	21.8008	1.50706	1.35405e-99	3.54385e-98		SLC4A10	23.7498	4.34545	4.78559e-117	1.06856e-115		DPP6	36.8089	1.41425	2.90824e-281	7.34072e-280		TUBB1	17.4865	2.03669	1.73621e-64	3.87131e-63		LAMTOR1	7.34821	0.714679	1.12498e-12	7.20572e-12		SARAF	12.3493
RBPMS	26.4259	0.998848	1.34291e-148	3.26823e-147		LRRC59	64.9484	1.74751	0	0		RP1-60O19.1	34.96	2.68764	3.44007e-254	9.38816e-253		SYMPK	21.7534	1.21198	2.95782e-99	7.70337e-98		TMEM238	23.742	1.26035	2.05879e-117	4.61637e-116		TWF2	36.7849	1.66145	7.13595e-280	1.78707e-278		RABAC1	17.4645	0.562008	1.55232e-64	3.4637e-63		TUBA1B	7.34691	0.744689	1.12856e-12	7.22575e-12		TPST1	12.3168
HMGB3	26.4183	0.723917	7.72477e-149	1.88428e-147		GALK1	64.8649	2.68738	0	0		MYL9	34.9497	2.2497	1.55381e-254	4.24408e-253		MIB1	21.6951	0.982808	8.11136e-99	2.10909e-97		NKX2-2	23.732	1.18672	1.65413e-117	3.71162e-116		EMP2	36.7413	1.30045	1.79819e-280	4.51739e-279		COL12A1	17.4591	3.06021	3.09693e-64	6.88134e-63		ARL16	7.34487	1.01039	1.15314e-12	7.3743e-12		FSD1L	12.2971
HRASLS5	26.4119	1.51795	3.7737e-148	9.14914e-147		PRDX6	64.766	0.891891	0	0		PARD6B	34.8072	1.25132	4.7189e-254	1.28672e-252		FAM127A	21.691	0.856524	6.43302e-99	1.67405e-97		GPX4	23.6458	0.54968	5.84065e-117	1.30323e-115		DST	36.7101	0.908771	5.93488e-281	1.49448e-279		EYS	17.4477	2.98214	3.65861e-64	8.11809e-63		MRPL28	7.34379	0.969648	1.16084e-12	7.42204e-12		CRMP1	12.2805
MAPKAP1	26.3648	0.883672	4.6542e-148	1.12668e-146		RP5-1159O4.1	64.6175	2.61845	0	0		FLNA	34.7809	1.55372	3.98955e-253	1.08506e-251		LIN7A	21.6615	1.91817	2.68014e-98	6.95747e-97		TMEM86B	23.6026	3.04841	8.47154e-116	1.87584e-114		GPRIN3	36.6761	1.36773	3.73317e-279	9.32708e-278		SERPINE2	17.414	1.55935	4.91948e-64	1.08856e-62		RP11-499P20.2	7.34353	2.2007	1.1712e-12	7.4853e-12		CELF3	12.2766
PRKRIR	26.3609	0.842999	4.21616e-148	1.02141e-146		SERPINH1	64.4835	1.86223	0	0		FREM1	34.7807	1.72098	7.55657e-253	2.04823e-251		RASSF6	21.6035	1.20924	5.73186e-98	1.48073e-96		MYH10	23.5881	0.808087	3.19081e-116	7.08011e-115		SLC3A2	36.6293	0.868316	7.0755e-280	1.77332e-278		PGAM1	17.4108	0.827505	4.31273e-64	9.54961e-63		APIP	7.34202	1.21526	1.1771e-12	7.52147e-12		RP5-984P4.6	12.2727
FGD5-AS1	26.2995	0.643854	1.39128e-147	3.35525e-146		EIF3G	64.458	0.973733	0	0		LUZP1	34.6519	1.10634	3.24512e-252	8.74402e-251		SRP9	21.5593	0.482627	5.12324e-98	1.32565e-96		INS	23.5582	1.05626	4.45912e-117	9.96358e-116		GADD45G	36.5544	1.7944	7.15723e-277	1.77845e-275		C1QL1	17.3965	1.3429	5.70968e-64	1.26166e-62		B4GALT3	7.33369	1.36291	1.24431e-12	7.9382e-12		MAP6	12.265
GNB5	26.2768	0.894106	4.155e-147	1.00052e-145		MID1IP1	64.4129	1.68942	0	0		BIRC5	34.6202	2.66261	9.59209e-250	2.56083e-248		STARD3NL	21.5175	1.01275	2.32372e-97	5.98358e-96		MAGED2	23.4565	0.618514	3.73638e-115	8.25054e-114		MT-ND4	36.2898	0.44176	1.45466e-277	3.62585e-276		VWA5A	17.3871	1.54093	7.79747e-64	1.71824e-62		EFHC1	7.33207	1.27847	1.25732e-12	8.01664e-12		PPP2R2B	12.2391
PROM1	26.2605	1.08324	8.35892e-147	2.00677e-145		C16orf89	64.36	6.40785	0	0		MAGI1	34.6003	0.96857	1.11643e-251	3.00569e-250		RTN1	21.5174	1.34353	2.98217e-97	7.66055e-96		TM4SF4	23.4349	0.798083	4.19617e-115	9.25942e-114		GNAO1	36.2363	1.73025	1.77497e-272	4.36967e-271		OPTN	17.3838	1.35534	7.67425e-64	1.69226e-62		LRRTM4	7.32839	2.59882	1.29427e-12	8.2438e-12		TCAF1	12.2184
ECE1	26.2218	0.714946	7.01243e-147	1.68605e-145		ATP5I	63.815	0.913024	0	0		ZWINT	34.5963	2.04286	4.77713e-250	1.2775e-248		TMEM61	21.5023	1.45357	3.90483e-97	1.00146e-95		A1BG	23.3978	1.70639	3.27025e-114	7.19139e-113		LINC01315	36.2311	2.74539	3.98179e-271	9.74241e-270		REV3L	17.3708	0.84613	8.26034e-64	1.81898e-62		RPL4	7.32817	0.443034	1.27397e-12	8.11937e-12		DOK6	12.2049
FREM2	26.2189	1.28157	2.65851e-146	6.349e-145		MLEC	63.7346	1.20041	0	0		SPG20	34.5704	1.29944	1.17726e-250	3.15353e-249		PHGR1	21.475	2.57613	1.18071e-96	3.01842e-95		CPEB4	23.3835	1.19249	3.37787e-114	7.42295e-113		ENPP2	36.1871	1.37918	4.66838e-272	1.14751e-270		ARPC2	17.3345	0.5905	1.28154e-63	2.8201e-62		BANF1	7.32657	0.717775	1.29629e-12	8.255e-12		ENPP2	12.2048
KIAA0319L	26.208	0.8911	1.92226e-146	4.59757e-145		CCNL1	63.5278	1.13771	0	0		PTPN14	34.538	1.5642	7.6458e-250	2.04293e-248		PRKAR1A	21.4674	0.574176	3.52554e-97	9.04909e-96		UBL5	23.3511	0.521824	3.25561e-114	7.16414e-113		SGCB	36.1777	1.40572	6.83461e-272	1.67739e-270		LRFN5	17.3266	6.49645	2.60849e-63	5.71648e-62		ELOF1	7.32028	1.08452	1.35639e-12	8.62568e-12		ASCC3	12.2
ZMYM2	26.2003	0.677878	1.59533e-146	3.81851e-145		PDIA3	63.4764	0.866558	0	0		LINC00511	34.4788	1.49192	4.65056e-249	1.23847e-247		TSPAN1	21.3646	1.66653	7.3653e-96	1.86646e-94		ATP5L	23.3055	0.472301	7.74279e-114	1.69218e-112		TMX1	36.129	1.19468	1.87453e-271	4.59354e-270		NDUFB8	17.3099	0.535779	1.77839e-63	3.90806e-62		ARPC3	7.30172	0.623483	1.52562e-12	9.65952e-12		SORCS1	12.1856
GALNT7	26.185	0.913581	3.15279e-146	7.51819e-145		CSRP1	63.362	1.50487	0	0		ADRA2A	34.4603	1.269	4.49453e-249	1.19792e-247		SUSD2	21.3595	6.34956	1.47903e-95	3.74212e-94		VPS13A	23.2572	1.09558	4.77587e-113	1.03808e-111		FAM131C	36.1264	2.61374	8.83774e-270	2.14592e-268		PGAM2	17.2767	1.58347	4.18891e-63	9.16109e-62		LINC01481	7.2939	1.73787	1.61876e-12	1.0229e-11		RAP2B	12.1789
TCF7L1	26.1805	1.13402	5.94601e-146	1.41262e-144		CPVL	63.1831	4.06509	0	0		ELF5	34.2508	1.13056	9.95515e-247	2.63136e-245		HSBP1	21.357	0.482607	2.76696e-96	7.04539e-95		EVA1B	23.2455	1.1554	5.90267e-113	1.28212e-111		PITPNM1	36.1255	2.51294	8.61988e-270	2.09462e-268		KCNMB2	17.2617	1.70074	5.33761e-63	1.16493e-61		RGL3	7.29247	1.69552	1.63496e-12	1.03252e-11		C2orf54	12.1703
HNRNPM	26.1647	0.462596	1.95617e-146	4.67518e-145		ZFAND2A	63.156	2.44547	0	0		RP11-834C11.4	34.228	1.57839	2.40488e-245	6.31998e-244		PTBP2	21.3536	1.26794	7.20893e-96	1.82829e-94		KCNMA1	23.2446	1.29803	6.53938e-113	1.41946e-111		PLEKHM2	36.0658	1.38431	4.8311e-270	1.17664e-268		NENF	17.2467	0.828864	5.66807e-63	1.23621e-61		HAX1	7.28331	0.969495	1.72739e-12	1.09003e-11		FAM181B	12.1695
MAP3K1	26.1142	0.999461	2.28854e-145	5.42487e-144		BAG3	63.099	3.07784	0	0		HNRNPC	34.1063	0.453042	1.51721e-246	4.00368e-245		PDE5A	21.3535	1.07005	6.87488e-96	1.74634e-94		TSPAN1	23.214	1.64855	1.43079e-112	3.1015e-111		DOCK10	36.0604	3.70403	3.27789e-268	7.92901e-267		MAGEH1	17.2007	0.921614	1.13382e-62	2.46782e-61		FKBP1A	7.27329	0.653826	1.83587e-12	1.15552e-11		ARHGAP5	12.166
HNRNPH1	26.1111	0.507043	8.25029e-146	1.9586e-144		AKR7A2	62.8831	1.34564	0	0		TUBA1B	34.0658	0.859048	1.5017e-243	3.9335e-242		ENAH	21.2944	0.808481	1.57503e-95	3.98184e-94		SPATC1L	23.1884	1.34093	2.44401e-112	5.28707e-111		KCNQ2	36.0087	2.98704	8.0626e-268	1.9444e-266		NLGN1	17.1821	3.74497	2.27407e-62	4.92612e-61		ANAPC13	7.2616	0.98043	1.991e-12	1.2502e-11		TCEAL6	12.1623
G3BP2	26.0786	0.580581	2.68265e-145	6.35437e-144		RP11-362F19.1	62.8545	5.88704	0	0		WWC1	34.0235	1.27846	3.50389e-243	9.16291e-242		HNRNPR	21.2812	0.492229	1.08844e-95	2.75606e-94		ABCA5	23.1419	0.876349	3.22665e-112	6.97542e-111		B3GNT8	35.9955	2.82095	7.99527e-268	1.92962e-266		SFRP1	17.1813	2.59575	2.09144e-62	4.53975e-61		PPP2R2B	7.23282	2.41038	2.41773e-12	1.50955e-11		HTR1F	12.1559
FAM110C	26.0407	1.41047	3.14312e-144	7.4121e-143		APOC1	62.7316	2.27721	0	0		TPX2	33.9714	2.80555	8.50591e-241	2.20092e-239		GNAI2	21.2242	0.640592	4.57528e-95	1.15576e-93		TMEM45B	23.1146	3.1112	2.15899e-111	4.64219e-110		CALB2	35.8992	2.41554	4.48871e-267	1.08006e-265		OAZ1	17.1775	0.436935	1.26985e-62	2.76201e-61		NDUFA5	7.21943	0.69939	2.61677e-12	1.63063e-11		FAM110B	12.1371
CTNNB1	26.0342	0.631986	7.96748e-145	1.88167e-143		EGR1	62.6514	1.13056	0	0		MCM7	33.9451	1.27292	4.97841e-242	1.29341e-240		TMEM206	21.2133	1.7733	1.36294e-94	3.43208e-93		DRAIC	23.1043	2.41722	2.28992e-111	4.92039e-110		RP11-881M11.4	35.8977	5.2794	1.20033e-265	2.8817e-264		JAM3	17.1385	1.53419	3.59217e-62	7.7394e-61		KIAA1324	7.19659	1.33464	3.04731e-12	1.89044e-11		KIDINS220	12.1177
EGR1	26.0212	0.541888	4.48284e-145	1.06028e-143		SSFA2	62.5359	1.72892	0	0		UHRF1	33.9266	2.87536	2.43298e-240	6.26998e-239		TP53INP1	21.2097	1.22974	9.85488e-95	2.48552e-93		RAP1GAP	23.074	1.37314	2.44499e-111	5.25008e-110		NCAM1	35.8919	1.57846	5.98351e-268	1.44519e-266		DTD1	17.1051	1.0152	5.191e-62	1.11615e-60		ESD	7.19606	0.670299	3.04022e-12	1.88677e-11		RTN4	12.1122
SMARCA4	25.9836	0.707301	4.44265e-144	1.04535e-142		DMKN	62.2405	1.21042	0	0		CBX5	33.901	0.571611	5.23479e-243	1.3667e-241		TTC3	21.1691	0.488085	9.93372e-95	2.50342e-93		AAK1	23.0047	1.24271	9.61266e-111	2.05857e-109		P4HTM	35.8019	1.02527	1.08094e-267	2.60486e-266		ENO2	17.0975	1.67849	6.75964e-62	1.45148e-60		TOX	7.19425	1.85283	3.10159e-12	1.92299e-11		BAIAP3	12.0287
PARP1	25.9511	0.489535	4.38406e-144	1.03232e-142		RPL27	62.2404	0.613544	0	0		H3F3B	33.8793	0.334596	5.32232e-245	1.3964e-243		GABARAP	21.1156	0.719421	4.26769e-94	1.0696e-92		RAB4B	22.9882	1.63142	1.6922e-110	3.62144e-109		RASGEF1B	35.7913	2.53961	4.49818e-265	1.07828e-263		NEBL	17.0854	1.89677	8.45156e-62	1.81113e-60		AQP3	7.18066	3.67456	3.40221e-12	2.10365e-11		LMO4	12.0172
SAT2	25.9076	0.530202	1.27365e-143	2.99246e-142		ADI1	62.0169	1.4601	0	0		MAD2L1	33.8399	1.85783	6.95982e-240	1.78496e-238		SECISBP2	21.1059	0.812295	5.62725e-94	1.40924e-92		SMIM24	22.9697	1.3015	1.74027e-110	3.72181e-109		STMN1	35.7801	0.664537	1.2101e-269	2.93606e-268		PCDH9	17.075	2.66537	1.09985e-61	2.34905e-60		SPTSSA	7.17536	1.101	3.49604e-12	2.16e-11		BEX5	12.0113
FZD7	25.8899	1.68431	1.55869e-142	3.63809e-141		RP11-528G1.2	61.7904	2.12446	0	0		ARL6IP1	33.8121	0.736207	1.00669e-240	2.60062e-239		YWHAG	21.0856	0.732217	7.23657e-94	1.81084e-92		C12orf76	22.9274	0.937337	3.28691e-110	7.01076e-109		PVRL3	35.6834	1.55661	1.80754e-264	4.31997e-263		TMED8	17.0518	1.30651	1.28617e-61	2.74515e-60		C1orf43	7.14343	0.827225	4.28716e-12	2.6335e-11		FOXP1	11.9873
LUZP1	25.8591	0.908904	1.05774e-142	2.47246e-141		GALNT2	61.7858	1.58572	0	0		MYL12B	33.7516	0.486386	3.01637e-241	7.82394e-240		BZW1	21.0474	0.572999	1.25359e-93	3.12956e-92		PODXL2	22.909	1.4625	7.93201e-110	1.68509e-108		XXYLT1	35.6258	1.73993	2.46286e-263	5.86859e-262		SVIP	17.0362	0.742313	1.3535e-61	2.88499e-60		KCNJ3	7.11947	3.04074	5.04808e-12	3.08548e-11		TPST2	11.9781
PARD6B	25.847	1.00899	1.62729e-142	3.79543e-141		ATP5D	61.7845	1.07466	0	0		NFKBIA	33.7405	0.949903	5.35425e-240	1.37429e-238		UBE2E3	21.0363	0.730626	1.93976e-93	4.83124e-92		MAMLD1	22.8918	3.16503	2.12849e-109	4.50085e-108		ATP8A1	35.6149	1.88826	2.20514e-263	5.25842e-262		FKBP2	17.0359	0.468701	1.01481e-61	2.16887e-60		TCEAL1	7.11755	1.46033	5.08888e-12	3.10922e-11		MAPK8IP2	11.9751
PRRC2C	25.7974	0.433406	1.68682e-142	3.93141e-141		ZFP36L1	61.673	1.26186	0	0		EXT1	33.7054	1.15824	4.06388e-239	1.03974e-237		SLC25A29	20.9844	1.47178	9.42297e-93	2.33237e-91		PPP2R2B	22.8747	2.52572	2.53364e-109	5.35047e-108		C12orf76	35.6016	1.04086	1.89998e-264	4.53749e-263		TSPAN5	17.0316	1.27649	1.69666e-61	3.61404e-60		SAMD5	7.08937	1.56983	6.09473e-12	3.70535e-11		RUNDC3A	11.9674
CCDC6	25.7942	0.741042	3.77292e-142	8.78696e-141		ERLEC1	61.61	1.09563	0	0		CFLAR	33.6194	0.898973	2.60948e-238	6.65502e-237		MORF4L1	20.9602	0.383424	4.73262e-93	1.17506e-91		ABHD14A	22.8677	0.878731	1.05425e-109	2.23669e-108		UBE2E3	35.4982	0.879501	2.70375e-263	6.4378e-262		ADGRG2	17.01	3.86237	3.10967e-61	6.59307e-60		BAX	7.08276	0.970742	6.34609e-12	3.85303e-11		NLGN1	11.9634
LARGE	25.7787	1.13877	1.03187e-141	2.39619e-140		CMTM8	61.223	1.2751	0	0		ILF3	33.5351	0.615434	6.53644e-238	1.66567e-236		ARHGDIA	20.9427	0.806038	1.18968e-92	2.94012e-91		TOX3	22.866	1.13593	1.57388e-109	3.33029e-108		ASS1	35.4223	2.98024	7.98838e-260	1.87551e-258		NSG1	17.0051	1.8664	2.92076e-61	6.19668e-60		TUSC3	7.07283	0.845352	6.7511e-12	4.09426e-11		RGS4	11.9624
SEPT10	25.7632	1.11267	1.7393e-141	4.03311e-140		VIMP	60.9112	1.20089	0	0		SUPT16H	33.4376	0.736286	2.96858e-236	7.54072e-235		OAZ2	20.9218	0.692554	1.5153e-92	3.74197e-91		RUFY3	22.7976	1.02379	5.20541e-109	1.09781e-107		AC004540.4	35.3818	3.08268	3.94328e-259	9.2241e-258		BLMH	17.0037	1.01011	2.45983e-61	5.2257e-60		CADPS	7.055	0.816471	7.55117e-12	4.57078e-11		HSD11B1L	11.9579
HIF1A	25.6978	0.683396	3.69764e-141	8.54929e-140		TMEM14A	60.7677	1.44403	0	0		B4GALT1	33.4344	1.57032	9.43833e-235	2.37858e-233		XRN2	20.9171	0.620085	1.59974e-92	3.94438e-91		IGFBPL1	22.7303	2.84165	5.25565e-108	1.09969e-106		ATP6V0B	35.3318	0.624428	3.06013e-262	7.26468e-261		PLXNC1	16.8678	1.49661	2.13112e-60	4.47382e-59		CHMP5	7.05177	0.950552	7.74043e-12	4.6818e-11		AAK1	11.9244
PRSS23	25.6632	0.943823	1.17637e-140	2.70811e-139		MSMO1	60.7127	1.6663	0	0		PALM3	33.4161	1.97542	5.10899e-234	1.28348e-232		CAPRIN1	20.8705	0.744132	4.98086e-92	1.22243e-90		RABAC1	22.691	0.561767	2.28674e-108	4.80366e-107		SCAMP1	35.329	1.0642	1.21232e-260	2.85679e-259		FAM200B	16.8654	0.774411	1.81072e-60	3.80871e-59		POLR2L	7.04376	0.558161	8.09551e-12	4.89378e-11		MARCH8	11.9215
TFDP2	25.6202	0.659814	2.12632e-140	4.88442e-139		MRPL18	60.6913	1.31598	0	0		MNS1	33.4063	1.3865	8.76037e-235	2.21122e-233		ACTL6A	20.8519	0.93758	7.76922e-92	1.90385e-90		RCAN3	22.6824	1.04742	5.47562e-108	1.14497e-106		CYB5R3	35.2311	0.894012	1.06911e-259	2.50822e-258		INA	16.863	1.86557	2.44836e-60	5.13642e-59		YIPF6	7.03703	0.929858	8.5043e-12	5.13798e-11		DNAJC12	11.873
MYO1B	25.6001	0.883289	5.69142e-140	1.3027e-138		BMP7	60.6391	2.47388	0	0		KIF11	33.3963	2.74266	3.20972e-233	8.05078e-232		RUNDC3A	20.844	1.33858	1.05189e-91	2.56585e-90		SOX5	22.6076	1.93854	4.87372e-107	1.01182e-105		MAGED2	35.168	0.64936	2.91793e-259	6.83062e-258		TAC3	16.8377	1.64546	3.33399e-60	6.98061e-59		ARF3	7.0312	1.1553	8.83522e-12	5.33186e-11		NAT14	11.8551
BACH1	25.586	0.903612	7.89133e-140	1.80236e-138		TMEM51	60.4385	1.92958	0	0		CNTNAP5	33.3324	4.16886	8.06395e-232	2.01788e-230		FAM89B	20.8428	1.02189	1.02714e-91	2.50738e-90		ELAVL4	22.5795	1.16324	4.16043e-107	8.65423e-106		PYCR1	35.1359	1.21433	1.17322e-257	2.73637e-256		RP11-136K7.2	16.8377	1.92405	3.62224e-60	7.57916e-59		PPP1CB	7.02654	0.791493	9.07832e-12	5.47442e-11		MAP1LC3A	11.8466
ZFC3H1	25.5831	0.79712	6.8551e-140	1.56681e-138		FREM2-AS1	60.3623	4.7081	0	0		CD59	33.2956	0.61234	8.92108e-235	2.25e-233		VPS13A	20.8039	0.936156	1.91674e-91	4.66476e-90		PTPRD	22.56	1.99345	1.34953e-106	2.77644e-105		LINC00665	35.0008	1.20545	1.43532e-255	3.32582e-254		ANKH	16.8047	1.81488	5.84008e-60	1.22038e-58		TSSC4	7.01761	1.11354	9.63748e-12	5.80284e-11		SYT11	11.8215
NRDC	25.5705	0.599466	6.55158e-140	1.49851e-138		IRF1	60.2541	1.79693	0	0		ORC6	33.2797	2.01499	2.74595e-232	6.88211e-231		CCT2	20.779	0.517232	1.85679e-91	4.52229e-90		KCNJ3	22.5508	2.91959	1.9239e-106	3.95303e-105		CABP7	34.8253	2.33575	3.84349e-252	8.80363e-251		DSEL	16.7422	1.53141	1.44522e-59	3.00821e-58		SH3BGRL3	7.01617	0.850966	9.69804e-12	5.83821e-11		DUSP26	11.8202
HMGA1	25.5694	0.73647	1.1199e-139	2.55418e-138		MT-ATP6	60.1503	0.78178	0	0		HNRNPR	33.1995	0.536736	1.51727e-233	3.80869e-232		CORO2B	20.7643	2.91194	8.5893e-91	2.07613e-89		STX1A	22.5433	1.11525	7.71974e-107	1.59541e-105		ABAT	34.8168	1.15329	1.89721e-253	4.3707e-252		NPAS3	16.7286	2.16773	1.94606e-59	4.0428e-58		NDUFS7	7.01279	0.730285	9.90211e-12	5.95993e-11		PPM1L	11.8132
LIMCH1	25.5477	0.979959	2.14347e-139	4.8782e-138		PDHA1	59.7478	1.26882	0	0		ITGA2	33.1912	1.63142	1.61767e-231	4.03849e-230		RHBDD2	20.7564	0.845046	4.09123e-91	9.92651e-90		MRFAP1	22.5384	0.550505	6.28144e-107	1.30238e-105		MXRA7	34.7639	0.99706	8.34131e-253	1.91748e-251		PRDX2	16.7127	0.388735	1.47111e-59	3.05811e-58		BCAS4	7.00295	1.55024	1.05996e-11	6.36896e-11		GUCA2A	11.7903
RBMX	25.4349	0.43442	9.45977e-139	2.14372e-137		OST4	59.6811	0.807088	0	0		DHFR	33.1628	1.80239	5.92577e-231	1.47705e-229		MTCH2	20.7081	0.753231	9.76985e-91	2.35969e-89		ATP9A	22.5305	1.23862	1.56173e-106	3.21096e-105		SYT14	34.7433	2.38875	6.01824e-251	1.37554e-249		KCNB2	16.6893	1.52811	3.08723e-59	6.40515e-58		TM2D1	7.00102	1.10837	1.07143e-11	6.43604e-11		GNG12	11.7119
TRIP6	25.3875	1.03585	1.23869e-137	2.79317e-136		MT-ND2	59.665	0.716012	0	0		PKHD1	33.1467	1.94507	2.41691e-230	6.01028e-229		C10orf82	20.6586	1.72589	4.71038e-90	1.1317e-88		ATP5J2	22.5182	0.571521	9.90654e-107	2.04206e-105		ABCA2	34.6179	2.23894	2.38946e-249	5.43803e-248		SVOP	16.6696	2.21028	4.75181e-59	9.82041e-58		NDUFS4	7.00052	0.815877	1.07153e-11	6.43604e-11		TMEM45B	11.6992
WWC1	25.3656	1.0372	1.90437e-137	4.29122e-136		TMEM181	59.3149	1.53852	0	0		CDK1	33.138	2.6784	5.94113e-230	1.47627e-228		KIF5B	20.6557	0.529764	2.07338e-90	4.99646e-89		INSM1	22.5133	0.918838	8.46412e-107	1.74699e-105		GPSM1	34.5758	2.21324	1.47973e-248	3.35805e-247		PIGP	16.6621	0.867857	4.05022e-59	8.38152e-58		LLGL2	6.99083	1.03374	1.14263e-11	6.84891e-11		PRMT2	11.683
ZNF737	25.3348	1.21421	5.11569e-137	1.14869e-135		TMEM52	59.2504	3.99554	0	0		NME4	33.0719	0.724917	2.6966e-231	6.72675e-230		XIST	20.6376	0.691962	3.33868e-90	8.03345e-89		GDA	22.4934	4.33744	7.77275e-106	1.58483e-104		MYCN	34.5638	3.79344	9.06992e-248	2.05246e-246		MLXIPL	16.6619	1.16171	4.30888e-59	8.9108e-58		SMCO4	6.98856	1.36744	1.16103e-11	6.95657e-11		HSBP1	11.6792
NIPSNAP1	25.319	0.589173	2.43981e-137	5.49e-136		OS9	59.2017	1.05815	0	0		CLSPN	33.0545	2.85345	1.07015e-228	2.64474e-227		PSMD2	20.6045	0.662186	5.98896e-90	1.4378e-88		PNMA1	22.48	1.28591	4.22626e-106	8.63368e-105		C10orf10	34.4569	1.4241	4.97652e-248	1.12775e-246		NEFM	16.6598	3.53642	6.07558e-59	1.254e-57		ELL2	6.97866	0.924323	1.23186e-11	7.36304e-11		FAM134B	11.6487
HIPK2	25.229	0.657273	2.72698e-136	6.10606e-135		PFDN5	59.034	0.547991	0	0		PHLDA1	33.0451	1.14473	9.18749e-231	2.28827e-229		MYEF2	20.5588	0.832438	1.78673e-89	4.25748e-88		CHST9	22.4734	0.818337	2.82513e-106	5.79359e-105		GCGR	34.3008	5.12177	6.00082e-244	1.3399e-242		CNTN5	16.646	6.38378	7.80723e-59	1.60829e-57		EDARADD	6.97859	1.99622	1.23953e-11	7.40748e-11		ERICH3	11.6406
ANP32A	25.1447	0.526859	1.32277e-135	2.95357e-134		TXNDC12	58.8869	1.1437	0	0		TYRO3	33.039	1.98588	3.56573e-229	8.82588e-228		HNRNPDL	20.55	0.406957	1.24592e-89	2.97425e-88		DCTN3	22.4616	0.639131	3.26571e-106	6.68425e-105		QDPR	34.2322	0.794349	7.78911e-247	1.75764e-245		GDAP1L1	16.6372	1.97686	7.25325e-59	1.49513e-57		AP2M1	6.96181	0.705534	1.36936e-11	8.16499e-11		GLG1	11.6005
SCTR	25.1383	0.938031	3.58017e-135	7.98289e-134		SEC11A	58.8606	0.783858	0	0		CDH6	33.01	2.29909	1.93943e-228	4.78193e-227		PIN4	20.5243	0.744673	3.14489e-89	7.46036e-88		ATP2B4	22.4568	1.23542	6.97133e-106	1.42233e-104		RP11-343J3.2	34.0063	2.02334	3.09566e-241	6.84518e-240		PRKACB	16.6245	1.23354	8.15071e-59	1.67688e-57		TMEM141	6.96082	0.706802	1.37459e-11	8.19313e-11		TBC1D24	11.5504
FGFR2	25.1323	1.3886	8.45317e-135	1.87698e-133		TMEM125	58.5786	1.7215	0	0		NBPF19	33.0096	2.15649	1.87033e-228	4.61513e-227		DYNC1LI2	20.5241	0.624582	2.71404e-89	6.44787e-88		MAPK8IP2	22.3939	2.40437	4.20116e-105	8.51162e-104		NUMBL	34.004	2.34231	6.80538e-241	1.5017e-239		CASR	16.597	1.52672	1.24929e-58	2.56526e-57		CTD-2314G24.2	6.94738	2.00227	1.51037e-11	8.96728e-11		ANKS1B	11.5283
ERICH1	25.0993	0.767627	6.53651e-135	1.45545e-133		EIF3F	58.5663	0.820771	0	0		CBX1	32.9005	0.703251	2.90209e-229	7.19438e-228		ZC2HC1A	20.5127	1.01819	4.71646e-89	1.11636e-87		NDUFA13	22.3755	0.58247	2.09749e-105	4.26306e-104		ELP4	33.9146	1.44463	1.37003e-240	3.01898e-239		CACNA1C	16.5921	2.04432	1.46544e-58	3.00523e-57		CES4A	6.93801	2.32571	1.60414e-11	9.51696e-11		AES	11.5238
HUNK	25.0986	1.30308	1.54305e-134	3.41913e-133		MEST	58.3697	1.03536	0	0		CAPG	32.8899	1.48235	7.56501e-228	1.86238e-226		COX11	20.5123	0.84192	4.17937e-89	9.907e-88		PRKAR1A	22.3689	0.631803	2.17667e-105	4.42118e-104		REC8	33.9078	1.5371	2.43703e-240	5.3665e-239		S100B	16.5918	1.38253	1.36632e-58	2.80377e-57		RPL9	6.91835	0.256442	1.76018e-11	1.04117e-10		AKR1B1	11.5126
RYK	25.0784	0.84081	1.31324e-134	2.91192e-133		HIST1H1C	58.3696	1.60204	0	0		CENPM	32.8538	2.60605	2.6117e-226	6.39015e-225		TPD52	20.5074	0.644744	2.76834e-89	6.57198e-88		CNTN4	22.3429	1.48006	7.37155e-105	1.48782e-103		SLCO3A1	33.9074	2.58043	1.97306e-239	4.32097e-238		RCAN3	16.5588	0.949156	1.8855e-58	3.86419e-57		MRLN	6.90361	1.65603	1.9862e-11	1.17096e-10		LAIR2	11.5109
NOM1	25.0604	1.07799	2.90798e-134	6.4213e-133		CERS4	58.3518	1.71777	0	0		GINS2	32.8519	1.82381	6.73489e-227	1.65165e-225		GABARAPL2	20.4625	0.499948	6.55806e-89	1.54881e-87		DDR1	22.3291	0.972547	6.78204e-105	1.37231e-103		MAF	33.8673	2.51377	5.35188e-239	1.16965e-237		GABRG2	16.5496	6.78543	3.28308e-58	6.70689e-57		NAGS	6.89863	4.35467	2.06106e-11	1.21375e-10		C9orf16	11.508
DOCK1	25.0557	1.0795	3.1824e-134	7.01754e-133		ALDOA	58.3311	0.852779	0	0		RELN	32.8386	1.61363	8.64217e-227	2.11776e-225		VAT1	20.4543	1.05245	1.29663e-88	3.0532e-87		LLGL2	22.3213	0.85922	7.12019e-105	1.43982e-103		FTCD	33.7369	4.06084	1.20411e-236	2.60658e-235		NDRG4	16.5256	1.48232	3.56865e-58	7.28096e-57		PCMT1	6.88357	0.769199	2.24423e-11	1.31894e-10		STXBP5L	11.5036
TJP1	25.0486	0.678011	1.9299e-134	4.27336e-133		HPN	58.308	1.28844	0	0		TK1	32.7645	2.55657	3.27714e-225	7.99382e-224		LRRC49	20.4396	1.71052	2.67579e-88	6.28683e-87		PEMT	22.3119	0.994308	8.01656e-105	1.61495e-103		VOPP1	33.7327	1.57446	5.61321e-238	1.21925e-236		C12orf76	16.5191	0.882485	3.4933e-58	7.13178e-57		MORF4L1	6.85172	0.537749	2.74073e-11	1.60248e-10		TOX	11.5017
ZNF711	25.0474	0.997157	3.48535e-134	7.68027e-133		CUZD1	58.1443	5.47045	0	0		CDK19	32.7563	1.57231	8.78813e-226	2.14694e-224		CACNB2	20.4286	1.62883	3.346e-88	7.82696e-87		RNASEH2C	22.2983	0.756826	1.01743e-104	2.04834e-103		QTRT1	33.7116	1.03759	2.53103e-238	5.50891e-237		CISD1	16.5182	0.721674	3.27612e-58	6.69697e-57		WDR61	6.8488	0.997292	2.79605e-11	1.63363e-10		PLPPR2	11.4991
SETD2	24.9277	0.669662	3.5378e-133	7.75305e-132		POLD2	58.1031	1.1398	0	0		C21orf62	32.7164	2.38502	2.07841e-224	5.0505e-223		EIF5B	20.4254	0.500466	1.42115e-88	3.34395e-87		ELL2	22.2769	0.843132	1.75683e-104	3.52803e-103		SYT17	33.7097	1.80966	1.32701e-237	2.88046e-236		ZFAND6	16.4997	0.730496	4.6046e-58	9.37659e-57		PFN2	6.84595	0.742685	2.83763e-11	1.65671e-10		ATP6V0A1	11.4766
MYH10	24.9234	0.597776	3.1586e-133	6.93155e-132		ACTG1	58.0812	0.54168	0	0		HSPG2	32.6927	1.48783	4.78138e-225	1.16453e-223		NAIP	20.4096	1.37741	4.21593e-88	9.85465e-87		KIF12	22.2225	0.760863	4.80547e-104	9.62601e-103		BAX	33.6707	0.896944	4.55368e-238	9.89781e-237		BRK1	16.4994	0.530494	4.07014e-58	8.29882e-57		C12orf57	6.84378	0.651619	2.87805e-11	1.6797e-10		JAM3	11.4651
SFRP2	24.9168	3.87263	4.6269e-132	1.00638e-130		EEF2	58.061	0.562267	0	0		SLC44A2	32.5343	1.40555	3.89984e-223	9.42635e-222		NDUFA9	20.3969	0.774041	3.29694e-88	7.71783e-87		SH3GL2	22.2123	1.71785	1.17834e-103	2.353e-102		ARF5	33.6632	0.774307	4.42416e-238	9.62285e-237		MAGI2	16.4944	1.49525	5.77307e-58	1.17336e-56		LRPAP1	6.83822	0.703905	2.9815e-11	1.73816e-10		USP11	11.4444
SNAP23	24.9035	1.03703	9.67653e-133	2.11335e-131		DDT	57.9043	0.961339	0	0		CXADR	32.5294	0.796349	4.70009e-224	1.13865e-222		FZD3	20.3634	0.999188	7.57574e-88	1.76565e-86		PDZD2	22.1821	2.09888	2.47931e-103	4.92623e-102		CACNA1D	33.5987	2.02976	7.72794e-236	1.665e-234		KLHL42	16.4578	1.04857	9.20319e-58	1.86695e-56		MAST4	6.82939	1.2184	3.16345e-11	1.83987e-10		LINC00616	11.4287
PABPC1	24.8834	0.339089	3.43466e-133	7.53219e-132		MPST	57.8536	1.39335	0	0		MAML2	32.5222	1.33188	5.35932e-223	1.29345e-221		YPEL1	20.3562	1.70868	1.27253e-87	2.95506e-86		DNAJC12	22.1633	0.989036	1.54778e-103	3.08109e-102		NMRK1	33.5946	1.55706	3.16958e-236	6.84278e-235		CLGN	16.3344	1.32292	6.10155e-57	1.22994e-55		MLLT3	6.81832	2.00517	3.39977e-11	1.9748e-10		GNAZ	11.4139
ZFAS1	24.8213	0.380782	1.85367e-132	4.04288e-131		C9orf84	57.8478	4.41595	0	0		PIK3R1	32.5003	1.03791	3.23837e-223	7.83342e-222		VPS35	20.3401	0.564926	7.78435e-88	1.81294e-86		SNX29	22.1557	1.53636	3.59923e-103	7.13809e-102		CD200	33.5725	1.38205	3.11888e-236	6.73788e-235		SGCB	16.3211	1.12343	6.95799e-57	1.39993e-55		TRMT112	6.81782	0.635629	3.38247e-11	1.9651e-10		FAM171B	11.3944
BOD1L1	24.8131	0.608914	4.64644e-132	1.00994e-130		SERBP1	57.309	0.612167	0	0		DIAPH3	32.4971	2.37366	9.67255e-222	2.31865e-220		PBXIP1	20.3394	0.938915	1.18709e-87	2.76065e-86		SSR4	22.1431	0.373754	7.91557e-105	1.59561e-103		PNMA1	33.5682	1.38015	4.81418e-236	1.03863e-234		NECAB2	16.2919	2.50045	1.31681e-56	2.64273e-55		EXOC7	6.79613	0.980314	3.88579e-11	2.24852e-10		B3GNT7	11.3826
ARHGEF19	24.7889	0.931208	1.13277e-131	2.45716e-130		MT-CYB	56.9338	0.667174	0	0		IQCA1	32.4923	1.79716	4.614e-222	1.10771e-220		SMARCC2	20.3293	0.790676	1.23783e-87	2.87655e-86		GIPR	22.128	1.80086	6.53976e-103	1.29297e-101		ROBO1	33.5516	1.87763	2.07303e-235	4.45435e-234		CLEC11A	16.2881	1.2156	1.1729e-56	2.35835e-55		AKAP12	6.7923	1.97609	3.99306e-11	2.30934e-10		KCNMA1	11.3775
SBK1	24.6736	1.20507	3.47318e-130	7.48809e-129		ATE1	56.5918	1.63704	0	0		CHEK1	32.4832	1.81445	4.46151e-222	1.0719e-220		KCNH6	20.3208	1.53641	1.99793e-87	4.63282e-86		SCRN1	22.1206	1.18424	5.4713e-103	1.08307e-101		NAP1L5	33.5492	1.6343	1.70857e-235	3.67372e-234		UNC5B	16.2605	3.72028	2.23921e-56	4.47982e-55		SELM	6.79019	1.36697	4.03584e-11	2.33323e-10		MBOAT2	11.3746
RTL1	24.6704	2.39907	7.82979e-130	1.68127e-128		C1orf233	56.4787	3.65314	0	0		IGF2-AS	32.441	2.14052	4.18321e-221	9.97534e-220		BAIAP3	20.3081	1.28138	2.19256e-87	5.08044e-86		PHPT1	22.1032	0.472553	3.39369e-103	6.73465e-102		BTBD3	33.5333	1.07904	5.99993e-236	1.29357e-234		MAGED2	16.2471	0.547841	1.73855e-56	3.48475e-55		SEC13	6.77406	0.88315	4.45054e-11	2.56462e-10		SLC26A4-AS1	11.3721
TRIP12	24.6379	0.720418	3.31982e-130	7.1623e-129		MT-CO2	56.4729	0.635746	0	0		KIF23	32.3935	3.28508	6.56534e-220	1.55398e-218		TMSB15A	20.1595	1.41817	4.00313e-86	9.16272e-85		SYCE1L	22.0941	1.51756	1.15375e-102	2.27262e-101		TMEM55A	33.5076	1.4018	3.64593e-235	7.82356e-234		GPAT4	16.2462	1.30456	2.23012e-56	4.46444e-55		C11orf31	6.77315	0.57469	4.4621e-11	2.57082e-10		RGS2	11.3348
SET	24.6196	0.40756	3.04529e-130	6.57444e-129		GPR161	56.3852	2.10964	0	0		TMEM63A	32.3414	1.27429	1.02438e-220	2.43729e-219		TOP2B	20.1455	0.737191	3.7539e-86	8.61077e-85		MRLN	22.0853	1.63977	1.36025e-102	2.67772e-101		VAMP2	33.4184	0.663276	1.16048e-235	2.4986e-234		ATP6V1E1	16.2329	0.970039	2.51161e-56	5.0185e-55		APBB1	6.7678	1.29957	4.63641e-11	2.6674e-10		C12orf76	11.3117
MARCH7	24.6006	0.656725	7.33061e-130	1.57514e-128		RPL17	56.3216	0.9186	0	0		RBMX	32.2456	0.507297	5.19748e-221	1.23847e-219		NDST3	20.1215	4.91875	1.48947e-85	3.38015e-84		RNF8	22.0789	0.998571	1.10631e-102	2.18052e-101		GSE1	33.3651	1.04894	7.73599e-234	1.65445e-232		STXBP1	16.2127	1.08819	3.39941e-56	6.77548e-55		ATF6B	6.76633	1.28096	4.68451e-11	2.69168e-10		KIF5A	11.2841
PTGR1	24.5704	0.671218	1.44135e-129	3.08668e-128		SRPRB	56.2869	1.40447	0	0		RBMS1	32.2453	1.01283	6.5205e-220	1.54451e-218		RASA4	20.1163	1.23805	7.5939e-86	1.73443e-84		TCEAL5	22.075	1.67538	1.84088e-102	3.6172e-101		KCNH2	33.315	1.60224	1.29736e-232	2.76349e-231		MAPK8IP2	16.2099	2.13024	4.2202e-56	8.40094e-55		ANKH	6.76321	2.08314	4.78769e-11	2.74948e-10		CDS2	11.271
KIAA0825	24.5292	1.62058	1.19966e-128	2.55538e-127		CIB2	56.2152	1.82702	0	0		SLFN13	32.221	2.73664	5.94808e-218	1.39649e-216		ASRGL1	20.1076	1.29253	9.737e-86	2.21915e-84		PGAM1	22.0742	0.816236	1.01532e-102	2.00243e-101		TMOD2	33.3131	1.61965	2.02871e-232	4.30983e-231		GNG12	16.1997	1.60888	4.54233e-56	9.0253e-55		ANXA7	6.75101	0.891928	5.13955e-11	2.94571e-10		APBB1	11.2688
ZMYM4	24.5263	0.758511	4.74979e-129	1.01513e-127		ARF4	56.211	0.886964	0	0		ATAD5	32.2076	1.755	1.78728e-218	4.21165e-217		TBCB	20.1047	0.62103	5.1235e-86	1.17187e-84		TIAM1	22.0678	1.9129	2.45383e-102	4.81271e-101		MIEN1	33.2978	0.81954	2.17433e-233	4.64391e-232		LCORL	16.1923	0.930055	4.53434e-56	9.01504e-55		UQCRQ	6.74788	0.56554	5.21906e-11	2.9886e-10		HRAS	11.2627
FAM111A	24.4827	1.03388	1.58779e-128	3.37987e-127		ATF4	56.1159	0.914005	0	0		HIST1H1D	32.1852	1.80247	5.40821e-218	1.27067e-216		LUC7L3	20.0756	0.434424	7.94572e-86	1.81349e-84		ATP6V1B2	22.0631	1.04208	1.59004e-102	3.12622e-101		PRPS1	33.2903	1.41983	3.01792e-232	6.40706e-231		AC009014.3	16.1858	3.77356	6.67835e-56	1.32201e-54		ACYP1	6.74347	1.33192	5.39528e-11	3.08453e-10		SESN3	11.2499
PPP1R15A	24.4254	0.676679	4.39101e-128	9.32215e-127		GIPC2	56.0398	2.09453	0	0		PAQR5	32.1661	2.53165	3.01243e-217	7.04667e-216		SUMO2	20.0625	0.374327	9.69589e-86	2.21136e-84		CFC1	22.0547	1.98772	3.15618e-102	6.17884e-101		TTC7B	33.2848	2.53992	3.45815e-231	7.3125e-230		MAPT	16.1844	2.58077	6.415e-56	1.27145e-54		TDP2	6.7424	1.09966	5.42526e-11	3.10112e-10		C5orf15	11.2289
PPP1R3C	24.4177	0.786406	5.04694e-128	1.07076e-126		CHID1	55.81	1.03889	0	0		NBL1	32.1182	1.95434	3.7371e-217	8.72901e-216		AASDHPPT	20.0459	0.667556	2.03823e-85	4.6222e-84		MXRA7	22.0475	0.919371	2.05364e-102	4.03277e-101		INPP5F	33.2846	1.43669	4.15373e-232	8.81253e-231		SSBP4	16.1614	0.771425	6.62134e-56	1.31154e-54		RAB3A	6.73964	1.96788	5.53437e-11	3.16179e-10		NANOS1	11.2275
RNF144A	24.3903	1.46909	2.3072e-127	4.86905e-126		DNAJA1	55.6806	1.06192	0	0		BRCA2	32.1064	2.63594	1.43883e-216	3.35097e-215		SNAPC3	20.0244	1.11845	4.09738e-85	9.25897e-84		NBEA	22.034	1.04218	2.89328e-102	5.66763e-101		SYT4	33.2049	1.55766	2.2495e-231	4.76302e-230		TLE1	16.1589	1.32038	8.09291e-56	1.59905e-54		QTRT1	6.73674	1.04067	5.61691e-11	3.2078e-10		CDC42EP3	11.2152
ZFYVE16	24.3781	0.712772	1.34417e-127	2.84799e-126		ALG5	55.4966	1.29927	0	0		ANLN	31.9985	3.00115	6.07725e-215	1.40106e-213		BID	20.0243	1.15731	4.2436e-85	9.58262e-84		BTBD11	22.0162	5.23248	1.08827e-101	2.12268e-100		FLYWCH2	33.1479	1.16342	1.21907e-230	2.5693e-229		LEPROT	16.1436	0.63783	8.44469e-56	1.66753e-54		ZG16B	6.73307	4.37332	5.78427e-11	3.30042e-10		PDXDC1	11.2099
IPO5	24.254	0.722381	2.74804e-126	5.76132e-125		GFRA3	55.4573	1.78386	0	0		PNISR	31.9618	0.464112	1.79871e-217	4.21371e-216		ACLY	20.0164	0.784563	3.591e-85	8.12045e-84		ESRRG	22.0035	2.83258	1.10818e-101	2.16021e-100		IGLON5	33.1106	4.7738	2.56897e-228	5.36476e-227		RHBDD2	16.1408	0.842546	8.97935e-56	1.77201e-54		EIF1AY	6.73139	1.67611	5.82168e-11	3.32118e-10		AASDHPPT	11.1856
CTNND1	24.2068	0.597237	4.80077e-126	1.00385e-124		ZNF503	55.2278	1.42375	0	0		UQCR10	31.9602	0.491612	6.00811e-217	1.40131e-215		C21orf59	20.0088	0.782951	4.74187e-85	1.07002e-83		UCN3	21.9992	1.7204	7.61921e-102	1.48796e-100		ASPHD1	33.0919	2.04068	3.66633e-229	7.67141e-228		PCBP4	16.1344	1.23972	1.12274e-55	2.21154e-54		RASA4	6.72644	1.51754	5.99776e-11	3.41735e-10		LRRC24	11.1819
SLC2A4RG	24.2039	0.709586	6.32565e-126	1.32185e-124		TMED3	55.0916	1.10345	0	0		ENAH	31.9175	0.771113	3.96014e-216	9.20956e-215		ENPP1	19.9935	1.77428	1.01339e-84	2.27231e-83		ARPC2	21.9671	0.572312	6.53794e-102	1.27758e-100		TTLL7	33.0096	1.04121	3.04965e-229	6.38526e-228		TCEAL7	16.0989	1.97615	2.10986e-55	4.13047e-54		KCTD12	6.72446	1.42884	6.06159e-11	3.45249e-10		MAPK3	11.1805
SMARCAD1	24.2004	0.791786	9.12205e-126	1.89998e-124		ARHGAP18	54.8285	1.18689	0	0		MAATS1	31.9124	1.71134	9.32573e-215	2.14532e-213		FYN	19.9907	1.09349	7.34704e-85	1.65438e-83		NDUFB1	21.9434	0.677341	1.25764e-101	2.45006e-100		AMPD2	32.984	1.68348	5.40036e-228	1.12408e-226		PPM1K	16.038	1.10768	4.45491e-55	8.68939e-54		SUMO1	6.7155	0.642185	6.38525e-11	3.631e-10		KPNA5	11.1778
LIMA1	24.1854	0.573452	8.80151e-126	1.83441e-124		TFR2	54.6595	3.08135	0	0		RAD51AP1	31.8961	2.38152	4.39169e-214	1.00882e-212		CACUL1	19.9819	0.737917	6.9492e-85	1.5659e-83		ROGDI	21.9109	1.10976	3.58369e-101	6.96029e-100		CNTNAP4	32.9566	4.32558	2.00386e-226	4.14668e-225		RP11-386G11.5	16.0094	2.65991	8.31983e-55	1.61491e-53		ABHD14B	6.71501	1.25352	6.43018e-11	3.65461e-10		PLCXD2	11.1684
EP300	24.1769	0.768364	1.55576e-125	3.23619e-124		NPM1	54.6422	0.504215	0	0		CTNNA1	31.8837	0.725805	9.10215e-216	2.11215e-214		FBXO32	19.9811	2.23575	1.43285e-84	3.20608e-83		GFOD2	21.8262	1.31295	2.12715e-100	4.11137e-99		GNAI1	32.9312	1.29124	6.0561e-228	1.25975e-226		BTBD3	16.0082	0.926851	6.5397e-55	1.27247e-53		SMIM24	6.71216	1.24567	6.53178e-11	3.70971e-10		TUNAR	11.1377
SIRT1	24.1193	0.958071	7.48562e-125	1.54903e-123		ZFP36L2	54.5823	1.0183	0	0		SPHK1	31.8809	2.17288	5.70379e-214	1.30929e-212		ZBTB18	19.9792	1.52441	1.28873e-84	2.88766e-83		MTSS1	21.8062	1.2071	2.90852e-100	5.61141e-99		TSPAN33	32.9193	2.04429	1.11208e-226	2.30427e-225		B3GAT3	16.0057	1.00095	6.92777e-55	1.34634e-53		RAB7A	6.69607	0.81051	7.20488e-11	4.07893e-10		SNCA	11.1325
SUPT3H	24.1039	0.963959	1.03029e-124	2.12789e-123		RP11-404P21.3	54.4777	3.0693	0	0		KIF12	31.8524	0.727712	3.48757e-215	8.05776e-214		LZTS1	19.9774	2.06157	1.44682e-84	3.23507e-83		CNTN1	21.7843	1.58982	5.23217e-100	1.00701e-98		SNRPN	32.8605	0.559626	2.86993e-228	5.98152e-227		APMAP	15.9831	0.834729	9.53815e-55	1.84914e-53		B3GAT3	6.6674	1.14105	8.61104e-11	4.84238e-10		SENP7	11.1194
PLCL1	24.0965	2.05514	3.34492e-124	6.89053e-123		JTB	54.4658	0.873781	0	0		MNX1	31.8438	0.85559	6.08248e-215	1.40125e-213		ABHD13	19.9767	1.02957	8.77991e-85	1.97147e-83		LRRTM4	21.7396	2.37363	1.71522e-99	3.28142e-98		CAMKV	32.8575	4.39653	4.0394e-225	8.32653e-224		MAGEF1	15.9813	0.740914	9.35179e-55	1.81411e-53		TVP23B	6.667	1.66499	8.65292e-11	4.86422e-10		CELF5	11.1192
SLC38A1	23.9519	0.846829	2.6241e-123	5.37789e-122		MGST2	54.4618	1.17254	0	0		SPRED1	31.8426	2.1577	1.96836e-213	4.49247e-212		SNRPB2	19.9254	0.583687	1.68142e-84	3.75701e-83		SARAF	21.7367	0.534668	5.7744e-100	1.10936e-98		AMACR	32.8548	2.46996	1.2406e-225	2.56225e-224		HSBP1	15.9568	0.48028	1.18317e-54	2.291e-53		ALDOA	6.65844	0.577309	9.04531e-11	5.07587e-10		C10orf35	11.1131
GRHL2	23.9461	1.39347	5.92533e-123	1.21279e-121		MTDH	54.4599	0.965794	0	0		UTRN	31.8424	0.751208	2.02426e-215	4.68366e-214		SMARCC1	19.8957	0.655853	3.32143e-84	7.40596e-83		PALLD	21.7181	1.50443	2.05366e-99	3.92185e-98		MT-CO2	32.8237	0.419156	9.63483e-229	2.01467e-227		RGAG4	15.9414	1.71179	1.99857e-54	3.85585e-53		C14orf132	6.65086	1.37067	9.53982e-11	5.34772e-10		MYH14	11.0981
SYNCRIP	23.9403	0.521328	2.26831e-123	4.65469e-122		PBLD	54.4548	2.64054	0	0		TET1	31.8371	0.94143	8.35501e-215	1.9234e-213		GPRIN3	19.8668	1.0791	7.48461e-84	1.65731e-82		SGCB	21.715	1.18453	1.71888e-99	3.28646e-98		MT-CO3	32.7973	0.383573	6.81038e-228	1.41573e-226		SV2A	15.9391	1.73594	2.09756e-54	4.04438e-53		C20orf27	6.64653	1.33884	9.79666e-11	5.48496e-10		SYT5	11.0924
GDPD5	23.9303	1.05921	4.73555e-123	9.69891e-122		TNFRSF12A	54.4339	1.70051	0	0		ASXL1	31.8344	0.828631	5.0068e-215	1.15511e-213		APBB1	19.8559	1.10276	8.35564e-84	1.84762e-82		LAMTOR5	21.7118	0.580774	1.09612e-99	2.09827e-98		MT-CO1	32.7426	0.373352	1.41922e-227	2.94831e-226		NAV3	15.9161	2.79389	3.17837e-54	6.1099e-53		WDR6	6.63435	1.02419	1.05457e-10	5.88986e-10		NPAS4	11.0897
MPZL2	23.8947	1.36134	1.6974e-122	3.4587e-121		EIF3K	54.4008	0.682931	0	0		GNB5	31.7721	0.986549	8.73108e-214	1.99988e-212		TSG101	19.847	0.684618	7.70276e-84	1.70443e-82		ENPP2	21.6852	1.14489	2.93393e-99	5.59619e-98		HRAS	32.6996	1.13944	8.25123e-225	1.69647e-223		ZSCAN16-AS1	15.9103	0.951407	2.69094e-54	5.17601e-53		ATP6V1D	6.63367	0.906216	1.05742e-10	5.90374e-10		SPATS2L	11.0825
HOMER1	23.8911	1.04029	1.44716e-122	2.95257e-121		SRM	54.3917	1.44172	0	0		HEXIM1	31.7681	1.00329	9.64098e-214	2.20513e-212		CCDC88A	19.8002	0.787023	1.96759e-83	4.32085e-82		FLOT1	21.6338	0.87024	6.77489e-99	1.28763e-97		LRFN2	32.6911	4.03774	5.37978e-223	1.10042e-221		CPEB4	15.8737	1.03563	4.70632e-54	9.00377e-53		POLR2G	6.61857	0.780319	1.15893e-10	6.45467e-10		CERS1	11.0767
MFAP2	23.8376	0.631679	2.70027e-122	5.48821e-121		BSPRY	54.3558	1.76117	0	0		DCP2	31.7079	1.0005	5.62806e-213	1.28177e-211		MEAF6	19.7892	0.58341	1.61008e-83	3.53819e-82		USF2	21.6067	0.974161	1.30809e-98	2.47731e-97		DSP	32.5893	0.635078	1.54283e-224	3.17005e-223		TPI1	15.8716	0.470183	4.10427e-54	7.8661e-53		HBA1	6.61509	1.63903	1.18687e-10	6.60569e-10		ZNF428	11.0753
WBSCR17	23.8285	2.04085	1.23422e-121	2.49421e-120		PSEN2	54.319	1.88687	0	0		TLE3	31.6967	1.25396	1.50461e-212	3.41209e-211		DNAJC7	19.7192	0.576804	6.83644e-83	1.49717e-81		PLCB4	21.5992	1.57266	2.13602e-98	4.03808e-97		GABARAPL2	32.5498	0.588551	6.0433e-224	1.23932e-222		ANXA6	15.8531	1.02192	6.06843e-54	1.15819e-52		VPS25	6.6099	0.837199	1.22157e-10	6.79525e-10		LINC01445	11.0692
EFEMP1	23.8016	1.13243	1.11431e-121	2.25332e-120		SLC16A10	54.2677	2.24826	0	0		ZNF738	31.6965	1.36937	2.29544e-212	5.19811e-211		FADS1	19.7139	1.14016	1.20153e-82	2.62593e-81		PLEKHB1	21.5833	1.13129	2.13813e-98	4.03967e-97		GRSF1	32.4874	0.873608	1.70881e-222	3.49086e-221		HMGCLL1	15.8495	1.60217	7.37546e-54	1.4068e-52		PIN1	6.60903	0.759138	1.22779e-10	6.82745e-10		SNAP25	11.0613
EHMT1	23.7749	0.797866	1.61219e-121	3.25188e-120		PLA2G16	54.027	1.41675	0	0		PPP1R9A	31.6831	0.766991	5.63766e-213	1.28304e-211		BNIP3L	19.7047	0.622157	9.52905e-83	2.08399e-81		RSPH9	21.5554	2.18116	6.12308e-98	1.15141e-96		LRRC10B	32.4777	2.43804	8.52924e-221	1.73243e-219		KCNJ2	15.7717	3.22057	2.58863e-53	4.89953e-52		SEC24D	6.5876	1.36121	1.40366e-10	7.76084e-10		GNG2	11.0481
SUPT16H	23.7729	0.572485	1.05948e-121	2.14381e-120		PRPS2	53.9951	2.50156	0	0		PYCARD	31.6815	1.56793	8.63215e-212	1.94788e-210		SAMD5	19.6613	1.30741	3.13215e-82	6.80801e-81		KCNN3	21.5066	3.00395	1.96457e-97	3.6748e-96		RGAG4	32.4466	1.9822	8.1134e-221	1.64902e-219		IGSF21	15.7707	6.74412	2.77344e-53	5.2462e-52		INPP5F	6.56592	1.44646	1.60183e-10	8.82599e-10		LGMN	11.0453
PARVA	23.7552	0.856653	2.47609e-121	4.98812e-120		GOLGA8B	53.8996	1.70937	0	0		ADAM10	31.6667	0.936472	1.65491e-212	3.75026e-211		GFRA1	19.6583	3.89286	5.75085e-82	1.2483e-80		SLC6A4	21.4937	3.87279	2.80872e-97	5.24765e-96		TOX	32.4052	1.85717	2.28143e-220	4.61635e-219		CDK5	15.7628	1.2634	2.4375e-53	4.61896e-52		TIAM1	6.55302	1.90435	1.73376e-10	9.52987e-10		CNTNAP2	11.0413
HNRNPA0	23.743	0.413455	1.33821e-121	2.70266e-120		CTRL	53.7358	7.14232	0	0		UACA	31.6571	1.36468	6.37674e-212	1.44097e-210		BPTF	19.6339	0.515582	3.05888e-82	6.65326e-81		TP53I13	21.49	1.31628	1.56991e-97	2.94002e-96		PCDH17	32.3471	1.09245	1.22696e-220	2.48899e-219		GTF2A2	15.7493	0.653761	2.56576e-53	4.85912e-52		OTUB1	6.53248	0.937289	1.95577e-10	1.07096e-09		TOMM7	11.0275
PAK1	23.7104	0.895279	7.03314e-121	1.41505e-119		IMPDH2	53.4013	0.948662	0	0		HKDC1	31.6435	3.21689	2.28084e-210	5.11487e-209		PDAP1	19.6326	0.492669	3.00067e-82	6.53112e-81		RFK	21.4407	0.948462	3.21349e-97	6.0004e-96		UNC5D	32.2504	2.51866	9.06222e-218	1.81871e-216		EPB41L3	15.7149	1.59245	5.20846e-53	9.81737e-52		RPS4Y1	6.5285	0.882428	1.98929e-10	1.08894e-09		SHROOM3	10.9905
PARP4	23.7092	1.14447	9.75805e-121	1.95836e-119		SMOC2	53.3731	2.52048	0	0		KIF20B	31.6231	1.51365	3.81268e-211	8.5792e-210		CEP44	19.624	1.33588	7.39088e-82	1.60211e-80		NCAM1	21.4246	1.3208	5.07058e-97	9.46252e-96		CRYBG3	32.2424	1.60147	2.24538e-218	4.51195e-217		TRAPPC4	15.6406	0.748505	1.2724e-52	2.38146e-51		INSM1	6.52396	0.928642	2.05076e-10	1.12182e-09		KIF13A	10.9879
KLHL7	23.7059	0.956509	9.30982e-121	1.86958e-119		NEAT1	53.327	2.08411	0	0		SPTAN1	31.6218	0.902089	5.30665e-212	1.20001e-210		RTN4	19.5643	0.528073	1.19244e-81	2.57959e-80		ABLIM2	21.4148	1.83404	8.15345e-97	1.5189e-95		VAT1	32.236	1.24609	8.88668e-219	1.7891e-217		DRAP1	15.6321	0.605117	1.33905e-52	2.50328e-51		PDK4	6.50495	1.76797	2.3152e-10	1.26129e-09		ARL3	10.9581
SKIL	23.6898	0.69603	8.21409e-121	1.65057e-119		SH3YL1	53.3252	1.17201	0	0		AHNAK	31.6098	2.32867	2.28111e-210	5.11487e-209		SYT4	19.5455	1.29695	2.44735e-81	5.27999e-80		HRAS	21.3945	1.0494	8.51444e-97	1.58522e-95		MTSS1	32.2069	1.25491	2.23053e-218	4.48495e-217		PLEKHB1	15.6297	1.06431	1.56877e-52	2.92587e-51		ATP6V1B2	6.48774	1.08644	2.56241e-10	1.39027e-09		ANKRD36C	10.9561
PODXL	23.6869	1.27454	1.77758e-120	3.5585e-119		NANS	53.3209	1.45005	0	0		FMR1	31.5624	1.151	9.82702e-211	2.20814e-209		ADGRG1	19.5454	1.05896	2.24118e-81	4.83846e-80		UQCC2	21.3714	0.742271	1.06873e-96	1.98862e-95		ATP2B1	32.1844	0.660295	3.88476e-219	7.82589e-218		SALL1	15.6058	6.83755	2.89548e-52	5.38454e-51		PNMA2	6.48591	1.89571	2.59786e-10	1.40807e-09		KIF16B	10.9399
ARHGEF40	23.6771	1.02761	1.808e-120	3.61261e-119		ACADVL	53.3165	1.07461	0	0		PDGFC	31.5333	2.24965	2.0858e-209	4.66056e-208		DNMT3A	19.5237	0.776813	2.65391e-81	5.72176e-80		TUNAR	21.3688	1.48523	1.59286e-96	2.96042e-95		KIAA1614	32.1789	2.83849	8.26178e-217	1.6508e-215		ANK3	15.5755	1.17161	3.56663e-52	6.62879e-51		COPS6	6.48589	0.723227	2.58576e-10	1.40199e-09		MBOAT4	10.9285
SMC5	23.6394	0.639636	2.30739e-120	4.60757e-119		DNAJC3	53.2923	1.10715	0	0		CMTM7	31.5044	1.88189	2.27674e-209	5.08366e-208		HOMER3	19.5202	1.82982	5.33147e-81	1.14636e-79		FAP	21.35	5.87148	4.93038e-96	9.12621e-95		DUSP9	32.1678	4.67941	3.30483e-216	6.58697e-215		IGSF10	15.5714	3.12826	4.48373e-52	8.32358e-51		SLC25A14	6.48437	1.62412	2.62098e-10	1.4194e-09		PBX3	10.9208
IFT57	23.6221	0.533039	3.32653e-120	6.63436e-119		LMNA	53.2648	1.53647	0	0		FAT3	31.4636	3.13584	3.54804e-208	7.87275e-207		HARS	19.4838	0.880798	6.2589e-81	1.34306e-79		PMVK	21.3499	0.811419	1.65112e-96	3.06692e-95		PRELID3B	32.1642	1.07068	6.07495e-218	1.21996e-216		CRYM	15.5603	4.03583	5.3642e-52	9.94244e-51		SAR1B	6.48367	0.982884	2.62414e-10	1.42087e-09		CHM	10.9194
CADM4	23.5986	1.08716	1.19369e-119	2.36736e-118		CLDN4	53.2065	1.03117	0	0		EFNA4	31.4387	1.12605	1.7576e-209	3.92999e-208		DDX24	19.4669	0.496923	5.74792e-81	1.23507e-79		B3GAT3	21.3451	1.03712	2.16087e-96	4.01142e-95		TMEM61	32.1557	1.65587	2.3394e-217	4.68321e-216		PLXNA2	15.5294	1.30245	6.93525e-52	1.28373e-50		MINOS1	6.48015	0.638273	2.67398e-10	1.44761e-09		PGM5	10.9179
IQGAP1	23.5908	0.612512	6.58068e-120	1.30917e-118		TOMM7	52.7487	0.662856	0	0		TMEM106C	31.3858	0.966388	7.11702e-209	1.58581e-207		SPHK2	19.451	1.72087	1.68701e-80	3.59827e-79		ARPP19	21.3227	0.691302	2.38373e-96	4.42e-95		DACH2	32.1074	2.62462	5.31448e-216	1.05661e-214		CUTA	15.5246	0.494007	6.0411e-52	1.11887e-50		GIPR	6.46237	1.89232	2.992e-10	1.61431e-09		CXADR	10.8985
ZFHX3	23.5847	0.670748	8.02677e-120	1.59586e-118		TIFA	52.7248	2.04044	0	0		TRIM56	31.3841	1.20815	1.89721e-208	4.22147e-207		ZMIZ1	19.4465	1.11964	1.42287e-80	3.04097e-79		LOXL4	21.2319	2.8475	3.98991e-95	7.32172e-94		PLCB4	32.0592	1.66014	4.9579e-216	9.86328e-215		NUDT9	15.5161	0.781425	7.49264e-52	1.38529e-50		HDDC2	6.45966	0.887068	3.02958e-10	1.63403e-09		CXorf57	10.8811
RBM25	23.5294	0.422357	2.01787e-119	3.99693e-118		PACSIN2	52.6904	1.42316	0	0		ID4	31.3551	0.855271	2.99075e-208	6.64081e-207		CHD4	19.4346	0.553038	1.15543e-80	2.47105e-79		FAM96B	21.2297	0.65327	1.52518e-95	2.81172e-94		FOXP4	32.0358	1.18312	3.383e-216	6.73857e-215		CNTN1	15.508	1.42779	9.2555e-52	1.70727e-50		CELF4	6.44988	1.14933	3.21176e-10	1.72709e-09		ADAMTS6	10.8806
DHCR24	23.5132	1.30021	1.04654e-118	2.064e-117		SLC30A1	52.6842	1.82552	0	0		PLEKHJ1	31.355	0.65121	4.99598e-209	1.11476e-207		ACTR3	19.4175	0.680217	1.75054e-80	3.73128e-79		TAC3	21.2198	1.58607	2.79308e-95	5.13431e-94		PRKCZ	31.9918	1.61705	4.49184e-215	8.90834e-214		HMGN3	15.5038	0.450245	8.06426e-52	1.48839e-50		TMEFF2	6.44138	3.5705	3.39946e-10	1.82397e-09		CTSF	10.8772
PDE1C	23.4441	1.5355	5.25265e-118	1.03274e-116		AHCYL1	52.5825	0.952391	0	0		PKP4	31.3459	1.31214	5.11518e-208	1.13343e-206		SOX11	19.4175	1.09989	2.50645e-80	5.32475e-79		KIF21A	21.1622	0.826893	6.30484e-95	1.15631e-93		C22orf42	31.9715	2.47066	2.37183e-214	4.68932e-213		SERINC1	15.4791	0.742093	1.25804e-51	2.31123e-50		RPLP0	6.43131	0.254809	3.5341e-10	1.89367e-09		DMD	10.8769
TP53BP2	23.4429	0.922442	3.04786e-118	5.99989e-117		MT-ND4	52.4543	0.593401	0	0		MSH6	31.1289	0.900582	1.28339e-205	2.81641e-204		CHMP1B	19.4059	0.735774	2.26724e-80	4.81977e-79		NDUFAF3	21.1449	0.686434	7.9278e-95	1.4498e-93		EFNB1	31.9134	2.60954	1.47763e-213	2.9088e-212		PLPPR2	15.4496	1.8236	2.24677e-51	4.10643e-50		SARAF	6.42777	0.600617	3.65927e-10	1.95844e-09		ZNF326	10.8757
PAK2	23.43	0.575229	2.46109e-118	4.84779e-117		LMAN1	52.2408	0.882888	0	0		GTSE1	31.128	3.15365	5.76682e-204	1.25347e-202		CCT3	19.3586	0.446022	4.03178e-80	8.54246e-79		CMIP	21.1082	0.798969	1.75377e-94	3.19623e-93		DYNLRB1	31.8605	0.581775	5.67318e-215	1.12373e-213		ATP9A	15.4429	1.06	2.21957e-51	4.05905e-50		C12orf73	6.42594	1.22249	3.70922e-10	1.98451e-09		SLC35F3	10.866
USP47	23.3692	0.542911	8.57339e-118	1.68253e-116		ARSE	52.2106	1.47407	0	0		NUDT1	31.0899	1.33425	9.46146e-205	2.06497e-203		GTF2I	19.3531	0.451845	4.37513e-80	9.25765e-79		HECTD4	21.1063	0.990028	2.09622e-94	3.81816e-93		TMEM27	31.8349	3.16729	2.82661e-212	5.52686e-211		HSD17B14	15.4369	1.36159	2.54236e-51	4.64403e-50		ERP29	6.41438	0.502812	3.95905e-10	2.11357e-09		PDE2A	10.8336
VIM	23.3391	0.824909	2.86434e-117	5.6075e-116		NSA2	52.165	0.74409	0	0		KNOP1	31.0302	0.904347	1.57349e-204	3.4318e-203		DHX36	19.3516	0.541279	5.05238e-80	1.06624e-78		VAT1	21.0737	1.14877	4.36071e-94	7.91123e-93		NUDT3	31.7553	0.857906	5.07444e-213	9.97088e-212		CDCP1	15.4121	1.8427	3.843e-51	6.99982e-50		TSPAN2	6.40748	1.15535	4.1352e-10	2.20429e-09		SRRM4	10.7971
SNX14	23.2564	0.761764	1.40423e-116	2.7373e-115		COMTD1	51.9492	1.46325	0	0		RGMA	30.9637	1.72048	1.3579e-202	2.93355e-201		CABP7	19.3164	1.86606	1.95942e-79	4.11606e-78		APH1B	21.0724	1.49521	5.57951e-94	1.01051e-92		AIF1	31.7423	1.99138	6.58814e-212	1.28581e-210		CA8	15.3866	1.74511	5.48568e-51	9.92958e-50		C7orf73	6.38621	0.631873	4.68572e-10	2.49027e-09		NAA38	10.7876
CRACR2B	23.2497	0.712996	1.21407e-116	2.36951e-115		SNHG23	51.8608	1.31911	0	0		PNN	30.9576	0.484835	2.18006e-204	4.74824e-203		PDHB	19.2971	0.647364	1.45638e-79	3.06339e-78		ABHD15	21.0707	2.0981	6.98206e-94	1.26167e-92		ALCAM	31.687	1.08633	5.41848e-212	1.05818e-210		NNAT	15.3855	1.14484	4.88746e-51	8.87694e-50		CREBL2	6.37788	1.6863	4.94565e-10	2.62404e-09		SLITRK6	10.7766
PAIP1	23.2454	0.583104	1.35168e-116	2.63648e-115		ITM2B	51.7512	0.680578	0	0		PRSS8	30.9357	0.962572	2.39957e-203	5.20505e-202		RTN2	19.2803	1.64409	3.18367e-79	6.67024e-78		ERICH3	21.0558	3.22672	1.19238e-93	2.14858e-92		WNT4	31.6429	1.9471	1.37614e-210	2.66951e-209		HSD17B10	15.3777	0.657512	5.09568e-51	9.24461e-50		TSHZ2	6.3582	1.03102	5.54233e-10	2.93136e-09		CITED2	10.7737
PRKDC	23.2385	0.537717	1.55822e-116	3.03563e-115		ERP29	51.6825	0.646241	0	0		KIAA1217	30.9128	0.990985	6.0703e-203	1.31585e-201		RCN2	19.2741	0.716086	2.69564e-79	5.65517e-78		NT5DC3	21.055	1.80335	9.00775e-94	1.62404e-92		FAM200B	31.6387	0.815289	1.38766e-211	2.70665e-210		NOVA1	15.3757	1.13012	5.76847e-51	1.04355e-49		SLC25A4	6.34568	0.797302	5.96201e-10	3.14656e-09		HCFC2	10.7733
NCBP3	23.2348	0.673665	2.21336e-116	4.30405e-115		HLA-A	51.6446	1.00837	0	0		CTNNAL1	30.8927	0.956852	1.11926e-202	2.41964e-201		VPS72	19.2571	0.852108	3.45198e-79	7.22764e-78		METRN	21.0545	1.16157	6.88426e-94	1.2447e-92		TSHZ1	31.6095	1.28566	1.24083e-210	2.40849e-209		PCBD1	15.3684	0.442171	5.35853e-51	9.70493e-50		DMD	6.33579	1.70849	6.34624e-10	3.34216e-09		DSCAML1	10.7687
YTHDC1	23.2259	0.483612	2.02998e-116	3.94986e-115		GPR160	51.5602	1.3023	0	0		CAPS	30.8798	2.03102	3.42252e-201	7.359e-200		SYT13	19.257	1.33066	4.06778e-79	8.51142e-78		ABCC5	21.0466	1.38307	8.78827e-94	1.58536e-92		ZC3H3	31.525	2.19405	8.53361e-209	1.64341e-207		ST3GAL1	15.3671	2.08327	7.49307e-51	1.35172e-49		SLITRK6	6.32111	4.82362	6.93807e-10	3.64603e-09		MS4A8	10.7396
ASAP2	23.2171	1.01938	4.6697e-116	9.04205e-115		UQCRB	51.5341	0.573301	0	0		ARSE	30.8736	0.892281	7.37891e-203	1.59626e-201		GDAP1	19.2292	0.750814	5.13711e-79	1.07418e-77		RIC3	21.0418	1.01619	7.1782e-94	1.29565e-92		C11orf95	31.4549	1.58467	2.2645e-208	4.35052e-207		TDP2	15.3631	0.902481	6.63455e-51	1.19955e-49		TRAPPC1	6.31836	0.688189	6.9991e-10	3.67689e-09		RCAN3	10.7372
COBLL1	23.201	0.736515	4.53298e-116	8.78265e-115		RHOC	51.355	1.20535	0	0		MND1	30.8731	2.31441	2.56464e-201	5.51813e-200		NSD1	19.2237	0.670509	5.60427e-79	1.1711e-77		ATP6V1F	21.0382	0.583381	5.7378e-94	1.03859e-92		DAAM1	31.404	0.740954	9.12206e-209	1.75568e-207		HAX1	15.3541	0.746913	7.31771e-51	1.32158e-49		NT5C3A	6.31327	1.10734	7.23229e-10	3.79814e-09		DCTN3	10.7369
CCT2	23.1878	0.426729	3.88721e-116	7.54062e-115		TACSTD2	51.3396	1.21195	0	0		ASPM	30.8305	2.90798	2.39559e-200	5.144e-199		AFAP1	19.2204	1.62036	9.66156e-79	2.0163e-77		PLS3	20.9527	1.42419	5.06942e-93	9.11411e-92		SOBP	31.3983	1.26749	7.18252e-208	1.3774e-206		FAM127A	15.3519	0.801759	7.4605e-51	1.3466e-49		CFDP1	6.29875	0.638856	7.8578e-10	4.11581e-09		PKIG	10.7309
BRD1	23.1589	0.751933	1.24596e-115	2.40821e-114		SLC38A3	51.264	2.84325	0	0		GATA6	30.7914	0.882382	1.46217e-201	3.15028e-200		RP5-984P4.6	19.2203	2.09592	1.08275e-78	2.25519e-77		RGAG4	20.9174	1.77578	1.18748e-92	2.13132e-91		DNAJC24	31.382	1.35007	1.14805e-207	2.20032e-206		EML5	15.3357	2.23954	1.17061e-50	2.10816e-49		TMEM27	6.29397	2.39866	8.12163e-10	4.24842e-09		GAREM1	10.7017
TRIM71	23.1528	1.48762	3.23501e-115	6.2451e-114		TM4SF1	51.2235	0.991817	0	0		DLGAP5	30.6699	3.24787	2.92507e-198	6.2265e-197		CCNY	19.2041	0.811747	8.874e-79	1.85315e-77		RAB29	20.8778	1.32803	1.98057e-92	3.54482e-91		TCEAL3	31.3807	0.912914	2.16016e-208	4.15255e-207		PRDX5	15.3192	0.441123	1.00536e-50	1.81158e-49		HBG1	6.29348	2.25692	8.14697e-10	4.26098e-09		NDRG4	10.6954
EVC	23.1501	1.96015	4.53027e-115	8.735e-114		EDEM2	51.0699	1.71331	0	0		BUB1B	30.6263	2.4565	4.70755e-198	1.00141e-196		GFOD2	19.1815	1.14513	1.57997e-78	3.28227e-77		OPTN	20.8742	1.27658	2.10048e-92	3.75733e-91		SNHG7	31.3695	0.890587	5.50183e-208	1.05573e-206		FAM96B	15.3137	0.596975	1.22155e-50	2.19865e-49		COX8A	6.29153	0.55556	8.19252e-10	4.282e-09		SLC9A7	10.6655
TAF1D	23.1458	0.474117	1.01282e-115	1.95877e-114		DNAJC4	51.0652	1.14596	0	0		SLC39A10	30.6262	0.822269	1.6178e-199	3.45991e-198		REC8	19.1786	1.1501	1.56524e-78	3.25379e-77		LRRC24	20.8662	2.09434	3.51346e-92	6.27081e-91		AES	31.3589	0.597203	1.6388e-208	3.15222e-207		SLC7A8	15.2906	0.920985	1.75633e-50	3.15941e-49		NDUFB6	6.28614	0.710849	8.45742e-10	4.41611e-09		SLC2A13	10.6639
OSBPL1A	23.1236	0.882676	2.86129e-115	5.52699e-114		GSTP1	51.0149	0.633761	0	0		PIK3AP1	30.6222	2.70811	7.2726e-198	1.54398e-196		CELF5	19.173	1.77929	2.28521e-78	4.73503e-77		LIN7B	20.8434	1.64048	4.62989e-92	8.25878e-91		SMIM4	31.3239	1.18477	4.09419e-207	7.83267e-206		TUBB2B	15.2655	0.875884	2.37887e-50	4.27206e-49		GLIPR2	6.28199	1.26918	8.68068e-10	4.52899e-09		TP53INP1	10.649
KDM3B	23.1088	0.858917	4.37141e-115	8.43379e-114		IDH2	50.8261	1.00834	0	0		BARD1	30.5949	1.56482	2.12194e-198	4.52595e-197		TBPL1	19.172	0.979629	1.66627e-78	3.4593e-77		GTF2I	20.8319	0.487329	2.40614e-92	4.29927e-91		CERKL	31.3195	2.30683	3.18855e-206	6.07824e-205		ABI2	15.2599	0.805645	2.82311e-50	5.06416e-49		RP1-39G22.7	6.28006	1.45994	8.79612e-10	4.58697e-09		SH3PXD2A	10.6382
AHSA2	23.0712	0.862783	9.49233e-115	1.82474e-113		P4HA2	50.8169	1.77113	0	0		PXDN	30.5742	1.03774	1.22685e-198	2.62205e-197		DUSP26	19.1449	0.988193	2.44617e-78	5.06198e-77		TMEM176B	20.78	1.66918	1.43771e-91	2.5546e-90		MCF2L	31.2793	1.32575	1.98745e-206	3.79313e-205		SLC36A4	15.2545	1.08071	3.15644e-50	5.64939e-49		PRUNE2	6.27641	2.42365	9.00621e-10	4.69423e-09		HRH2	10.6237
BNIP2	23.0374	0.839742	1.9965e-114	3.82642e-113		TMED6	50.8114	1.62899	0	0		PDPN	30.5528	3.17371	6.66203e-197	1.40594e-195		TMOD2	19.1243	1.27942	4.47247e-78	9.23115e-77		LYSMD2	20.7279	1.18647	3.35747e-91	5.9591e-90		CACNG4	31.1135	2.50484	1.57602e-203	2.98117e-202		BNIP3L	15.2174	0.649341	4.86482e-50	8.67786e-49		ENPP2	6.26425	1.23274	9.64356e-10	5.01497e-09		GNAL	10.6185
WWP2	23.0114	1.36603	5.86733e-114	1.12048e-112		PKIB	50.7509	1.64171	0	0		APOE	30.4845	1.08594	1.38388e-197	2.93604e-196		MSL3	19.12	1.17051	4.66976e-78	9.63214e-77		ETFDH	20.7233	1.19917	3.6671e-91	6.50503e-90		EPOR	31.0989	1.65189	5.09801e-204	9.67198e-203		KL	15.203	3.61794	7.94446e-50	1.41083e-48		DGUOK	6.26366	0.789115	9.65486e-10	5.01921e-09		HERC5	10.6171
EIF5	22.9907	0.389783	2.85097e-114	5.45425e-113		MEG3	50.7207	0.652769	0	0		HSPB8	30.4536	3.0921	1.23254e-195	2.58575e-194		LUC7L	19.1013	0.696797	4.96515e-78	1.02348e-76		IFI6	20.6988	1.46399	6.4778e-91	1.14527e-89		UBE2QL1	31.0896	2.37119	2.61429e-203	4.93639e-202		EMC7	15.1937	0.705727	6.73099e-50	1.19733e-48		RPSA	6.26066	0.301076	9.75735e-10	5.06918e-09		FNBP1	10.6014
SH2D4A	22.9833	0.964782	6.52429e-114	1.24519e-112		GJA4	50.6688	4.65366	0	0		KIFC1	30.4343	3.06117	1.77226e-195	3.70828e-194		PRPH	19.0953	3.75017	1.20467e-77	2.47523e-76		NDUFA3	20.679	0.647215	5.91142e-91	1.04629e-89		C1orf127	31.0744	2.78062	6.13916e-203	1.15648e-201		SOD1	15.1543	0.477544	1.11092e-49	1.96847e-48		APOO	6.2437	1.19017	1.08703e-09	5.62452e-09		A1CF	10.5989
SLC27A2	22.9804	1.42533	1.12414e-113	2.14164e-112		CYHR1	50.6599	1.17979	0	0		KIF15	30.4186	3.01332	2.58247e-195	5.38591e-194		RIMBP2	19.0871	1.25021	8.2759e-78	1.70264e-76		SMIM4	20.6321	1.08745	1.9238e-90	3.39376e-89		CYP2U1	31.0227	2.46356	2.12295e-202	3.98505e-201		VPS28	15.109	0.488248	2.0511e-49	3.62434e-48		ST8SIA3	6.23674	1.92545	1.13418e-09	5.85994e-09		FRRS1L	10.5973
XPO1	22.98	0.576003	4.7947e-114	9.16187e-113		TECR	50.6008	0.906868	0	0		PARD3B	30.4157	1.41546	3.21143e-196	6.75501e-195		DCTN1	19.0267	0.887715	2.07967e-77	4.26212e-76		DRAP1	20.624	0.63407	1.66723e-90	2.94277e-89		TRPM2	30.9834	5.82628	2.35327e-201	4.39929e-200		HRAS	15.056	0.955518	4.89692e-49	8.60532e-48		IAH1	6.22985	1.06802	1.17768e-09	6.07977e-09		NDUFAF3	10.5754
ZNF91	22.9277	0.628756	1.74717e-113	3.32066e-112		GNMT	50.5261	2.50998	0	0		FBN3	30.3856	1.78321	1.95254e-195	4.08014e-194		IMMP1L	19.0147	0.700438	2.22955e-77	4.56636e-76		NECAB2	20.6141	2.57861	4.60375e-90	8.10799e-89		NNAT	30.9306	1.24656	1.42954e-202	2.68659e-201		RIC3	15.0517	0.946895	5.12218e-49	8.99621e-48		UBE2V2	6.22667	0.747649	1.19795e-09	6.18139e-09		BOC	10.5696
NASP	22.9271	0.502484	1.3252e-113	2.52167e-112		HSD17B8	50.5246	1.41975	0	0		EZH2	30.3814	1.23676	5.15524e-196	1.08365e-194		PSMB6	18.9875	0.460755	2.9862e-77	6.10041e-76		CRMP1	20.5706	1.10657	5.35472e-90	9.42018e-89		SNX7	30.8894	1.25244	1.5573e-201	2.91298e-200		ABCC5	15.0389	1.27947	6.59805e-49	1.15692e-47		IDS	6.22305	0.994415	1.22386e-09	6.30798e-09		OVGP1	10.547
MBTD1	22.9233	0.94655	2.66132e-113	5.04609e-112		LSR	50.4536	1.45655	0	0		PPDPF	30.3799	0.435023	3.59053e-197	7.59243e-196		SAP30	18.9778	1.17933	6.01142e-77	1.22414e-75		GCK	20.5037	1.19577	2.02914e-89	3.55017e-88		NTNG2	30.8718	2.29495	9.82877e-201	1.82993e-199		FBXL15	15.024	0.991381	7.63159e-49	1.33741e-47		RSPH9	6.20766	2.05985	1.34305e-09	6.90003e-09		INSM1	10.5411
NBPF1	22.902	1.06144	4.9794e-113	9.41339e-112		PLCB1	50.4342	2.87346	0	0		E2F8	30.2976	3.78948	1.36176e-193	2.82344e-192		TMED8	18.9244	1.08675	1.35671e-76	2.75046e-75		NEBL	20.4962	1.83732	3.47497e-89	6.06647e-88		EMID1	30.8537	1.33594	4.8711e-201	9.09026e-200		USP11	15.0142	0.792826	8.44401e-49	1.47735e-47		PSAP	6.18999	0.567186	1.48103e-09	7.59546e-09		DISP2	10.5323
STRN3	22.8817	0.746866	5.58423e-113	1.05506e-111		LMF2	50.3567	1.68913	0	0		CARHSP1	30.2852	0.731811	1.81982e-195	3.80529e-194		RNF183	18.888	3.1215	4.20336e-76	8.49988e-75		CSTF3	20.4587	0.924852	4.72092e-89	8.2326e-88		BAIAP3	30.823	1.46322	9.04041e-201	1.68413e-199		CERS6	15.0017	1.00191	1.05144e-48	1.83859e-47		CARHSP1	6.1771	0.881067	1.59879e-09	8.181e-09		CFC1	10.5158
NET1	22.8794	0.883501	6.95463e-113	1.3132e-111		IL22RA1	50.3448	5.20075	0	0		ANP32A	30.2592	0.579699	2.07032e-195	4.32343e-194		C3orf14	18.8244	0.725876	5.64072e-76	1.1392e-74		SERINC1	20.4453	0.755679	5.40826e-89	9.42608e-88		MYL6B	30.7605	0.635564	7.99535e-201	1.49119e-199		SSR4	14.9789	0.328995	6.17092e-49	1.08262e-47		SLC37A4	6.17583	1.09642	1.61189e-09	8.24274e-09		GINM1	10.5113
APCDD1	22.8093	1.07324	3.55445e-112	6.69579e-111		EIF2S2	50.344	0.819036	0	0		PTPRK	30.2357	1.13497	3.21892e-194	6.69142e-193		DYNC1LI1	18.8237	0.765808	6.49698e-76	1.31131e-74		ORAI2	20.3874	1.13811	1.9342e-88	3.34556e-87		MLLT11	30.7486	1.27122	5.39948e-200	1.00119e-198		MRFAP1	14.9725	0.471924	1.36427e-48	2.383e-47		EIF1B	6.17573	0.574853	1.60882e-09	8.22925e-09		KIFAP3	10.4922
MYH9	22.7983	0.657804	2.91782e-112	5.49977e-111		PPP1R14B	50.3326	0.942637	0	0		PBK	30.2278	2.60029	3.022e-193	6.25356e-192		FUT8	18.8093	0.991697	9.94646e-76	2.0012e-74		LINC00936	20.3399	1.34582	5.37007e-88	9.25345e-87		CUTA	30.7389	0.529434	1.1143e-200	2.0734e-199		CCDC88A	14.9551	0.792379	1.91057e-48	3.32813e-47		RIIAD1	6.17099	1.68305	1.65947e-09	8.48333e-09		SVOP	10.4889
MID1IP1	22.7679	0.698885	5.45458e-112	1.02631e-110		EIF3L	49.9571	0.694373	0	0		IFFO2	30.1217	1.51855	2.14768e-192	4.42994e-191		PRELID3B	18.8056	0.848554	9.3611e-76	1.88461e-74		VSTM2L	20.3099	2.04835	1.04542e-87	1.79658e-86		GNB1	30.7304	0.75868	2.8846e-200	5.36431e-199		UQCC2	14.9329	0.669403	2.51897e-48	4.38553e-47		RTN4	6.1609	0.595626	1.75193e-09	8.94024e-09		NACAD	10.483
HHEX	22.7519	0.695728	5.56401e-112	1.04628e-110		PRSS16	49.9461	3.10139	0	0		PLEKHH2	30.0996	2.00523	8.49092e-192	1.74913e-190		SHROOM3	18.7957	1.36379	1.46979e-75	2.9479e-74		CDKN2D	20.3055	1.67918	1.18342e-87	2.03263e-86		OLFM1	30.7157	3.26913	2.19253e-198	4.03967e-197		GCNT1	14.9268	0.989799	2.82661e-48	4.91846e-47		ATP5G3	6.15443	0.466503	1.81525e-09	9.25451e-09		LRRTM3	10.483
SOX8	22.7308	2.8227	5.30052e-111	9.90899e-110		SEPP1	49.7868	0.977972	0	0		SLIT2	30.0863	2.30746	1.90412e-191	3.91743e-190		POLB	18.7924	1.16781	1.43381e-75	2.87754e-74		GCNT1	20.2812	1.10404	1.41215e-87	2.41898e-86		STK32C	30.6648	2.01983	3.15323e-198	5.79969e-197		MAP2	14.9143	0.906455	3.24036e-48	5.63227e-47		NDUFA8	6.14872	0.739043	1.88167e-09	9.57938e-09		RAP1GAP2	10.4781
RNF214	22.7089	0.752506	2.34464e-111	4.39862e-110		TRAM1	49.6885	1.06974	0	0		LAYN	30.0811	2.46543	2.19847e-191	4.51428e-190		SLC25A53	18.7904	1.47996	1.65219e-75	3.30956e-74		LINC01370	20.2779	3.26921	2.6445e-87	4.51303e-86		PODXL2	30.6591	1.4122	1.44525e-198	2.66436e-197		CRY2	14.9042	1.50965	4.30679e-48	7.47775e-47		LSM10	6.13463	1.04759	2.04287e-09	1.03735e-08		CDK5R2	10.4723
IGF2R	22.7061	0.908743	3.0206e-111	5.66339e-110		KRTCAP2	49.6254	1.104	0	0		SESN3	30.0759	0.903454	1.87592e-192	3.8719e-191		RP11-343J3.2	18.775	1.46542	2.05337e-75	4.10802e-74		TRAPPC4	20.2753	0.735844	1.26325e-87	2.16858e-86		CCDC167	30.6424	0.851759	6.21014e-199	1.14751e-197		CRYBA2	14.9028	0.79445	3.13298e-48	5.44859e-47		OCIAD2	6.13267	0.621861	2.06041e-09	1.04543e-08		DOPEY2	10.4614
LEFTY1	22.6837	0.999927	4.13887e-111	7.75098e-110		U47924.27	49.5009	2.23614	0	0		GRB14	30.0556	1.32044	1.05607e-191	2.17409e-190		BCL7A	18.7649	0.892675	2.1228e-75	4.24427e-74		POU6F2	20.2747	2.25413	2.49901e-87	4.2716e-86		NSMF	30.6288	1.58921	3.91755e-198	7.20135e-197		VSTM2L	14.8814	1.99137	6.01075e-48	1.0408e-46		TSTD1	6.11162	0.558868	2.32501e-09	1.17613e-08		QPCT	10.458
SRRT	22.6751	0.685689	4.58316e-111	8.57799e-110		AREG	49.3956	2.96614	0	0		SGOL1	30.05	2.5339	4.66923e-191	9.58152e-190		ZNF195	18.7547	0.979527	2.53318e-75	5.05528e-74		NDN	20.2269	0.82233	3.3927e-87	5.7868e-86		SCD5	30.5887	1.46367	8.29989e-198	1.52308e-196		PLCB4	14.879	1.34446	5.87831e-48	1.01842e-46		CHMP2A	6.1054	0.597721	2.40974e-09	1.21726e-08		RFX2	10.4518
NLN	22.6579	1.05363	1.06565e-110	1.98751e-109		STEAP1	49.383	4.91932	0	0		PERP	30.0318	0.562625	1.68555e-192	3.48121e-191		SGCB	18.7465	0.954924	2.60065e-75	5.18345e-74		ANK2	20.2232	3.04061	7.2275e-87	1.22752e-85		ATP6V0D1	30.457	0.856321	9.77721e-197	1.78699e-195		ASPHD1	14.8743	1.55065	6.37412e-48	1.10312e-46		HCFC1R1	6.10462	1.01576	2.42705e-09	1.22484e-08		PSD	10.4516
GSTM5	22.6452	1.84634	2.41874e-110	4.50061e-109		H2AFJ	49.372	0.929949	0	0		CCNB1	29.9982	1.83573	1.52307e-190	3.11941e-189		CAP1	18.746	0.647396	2.36276e-75	4.72109e-74		AHI1	20.2071	0.706646	4.23553e-87	7.21667e-86		UNC80	30.4476	1.09993	1.74141e-196	3.17915e-195		CACNA2D2	14.8651	1.9198	7.6268e-48	1.31777e-46		PRMT2	6.09626	0.78783	2.54416e-09	1.28131e-08		B3GALNT1	10.4452
RALY	22.6036	0.609576	1.91838e-110	3.57165e-109		DUSP22	49.2968	1.95622	0	0		MCM5	29.9679	1.69479	1.54719e-190	3.16678e-189		VPS37A	18.7443	0.91188	2.83183e-75	5.64069e-74		VPS13C	20.1972	0.875201	6.50014e-87	1.10516e-85		KATNAL1	30.4162	1.72019	2.34147e-195	4.25275e-194		LRRC42	14.8558	0.92232	7.70855e-48	1.33117e-46		DAD1	6.09612	0.508761	2.5399e-09	1.27957e-08		RAB3A	10.4375
RALGAPA2	22.5877	0.845366	3.59722e-110	6.67787e-109		SLIT3	48.9945	1.4765	0	0		CENPE	29.8761	2.58696	8.60176e-189	1.74828e-187		BHMT	18.7381	3.35422	5.77885e-75	1.14608e-73		NMB	20.1747	1.87778	1.44852e-86	2.44975e-85		RIMBP2	30.3994	1.43557	1.49677e-195	2.72009e-194		FRMD4B	14.8527	0.95895	7.92749e-48	1.36824e-46		BUD31	6.09226	0.668977	2.60031e-09	1.30814e-08		ZSCAN16-AS1	10.4357
DDX42	22.5654	0.628828	4.51281e-110	8.37269e-109		RAB11FIP1	48.936	1.10545	0	0		STMN1	29.8734	0.559956	5.02598e-191	1.0307e-189		PKIG	18.7255	0.833932	3.75219e-75	7.45534e-74		COX14	20.1696	0.659225	8.43468e-87	1.42875e-85		GRK6	30.3759	1.58824	6.18014e-195	1.11993e-193		CDC42EP3	14.8478	0.860701	8.03572e-48	1.38617e-46		TDRD9	6.07524	3.80502	2.88305e-09	1.44742e-08		ABTB1	10.4313
PRSS35	22.5316	1.06339	1.32753e-109	2.4587e-108		SNHG25	48.9174	1.50601	0	0		B3GALT5	29.87	1.92763	5.07782e-189	1.03271e-187		MS4A8	18.7159	2.00673	6.60126e-75	1.30675e-73		PRDX2	20.1581	0.372732	7.55578e-87	1.28191e-85		HN1	30.2881	0.764116	9.99912e-195	1.81096e-193		CLIP3	14.8285	1.66006	1.21937e-47	2.09777e-46		ANAPC11	6.07503	0.551071	2.86772e-09	1.4404e-08		SYCE1L	10.4289
[truncated: 3 more columns]

## Sheet: Sheet3
Sheet3: Marker genes of cell clusters in mouse integrated scRNA-seq atlas
MPC						Acinar						Ductal						Ngn3						Fev						Alpha						Beta						Delta						Epsilon
name	scores	logfoldchanges	pvals	pvals_adj		name	scores	logfoldchanges	pvals	pvals_adj		name	scores	logfoldchanges	pvals	pvals_adj		name	scores	logfoldchanges	pvals	pvals_adj		name	scores	logfoldchanges	pvals	pvals_adj		name	scores	logfoldchanges	pvals	pvals_adj		name	scores	logfoldchanges	pvals	pvals_adj		name	scores	logfoldchanges	pvals	pvals_adj		name	scores
Dynll1	90.3368	1.32438	0	0		Cpa2	390.03	5.61225	0	0		Spp1	237.719	4.53841	0	0		Neurog3	164.653	6.77985	0	0		Hmgn3	209.16	4.14633	0	0		Cpe	205.886	4.31466	0	0		Iapp	304.428	9.27209	0	0		Rbp4	167.405	6.3501	0	0		Isl1	148.894
H2afz	82.1743	1.08279	0	0		Cpa1	317.124	5.45253	0	0		Sparc	234.983	3.14336	0	0		Btbd17	117.474	5.6846	0	0		Chgb	185.429	6.25566	0	0		Tmem27	199.236	6.13558	0	0		Ins2	239.282	11.366	0	0		Pyy	142.213	8.43504	0	0		Malat1	74.2165
Hmgb2	79.8852	1.86041	0	0		Gamt	304.693	3.92748	0	0		1700011H14Rik	178.901	2.90826	0	0		Gadd45a	114.738	5.36249	0	0		Cpe	163.91	3.7465	0	0		Pyy	151.2	6.60261	0	0		Pcsk2	216.236	5.61799	0	0		Hmgn3	109.972	3.75612	0	0		Map1b	67.9682
Cenpa	72.6917	2.70159	0	0		Serpina6	299.793	4.93912	0	0		Anxa2	175.679	3.36882	0	0		Mdk	112.025	1.81995	0	0		Chga	152.516	4.72289	0	0		Hmgn3	150.354	3.13494	0	0		Cpe	197.124	4.31088	0	0		Malat1	96.106	2.19972	0	0		Cdkn1a	67.5048
2700094K13Rik	62.7679	1.27706	0	0		P2rx1	277.465	5.36836	0	0		Vim	164.683	2.34861	0	0		Hes6	110.757	2.54258	0	0		Gnas	147.908	2.19524	0	0		Pcsk1n	144.719	4.84982	0	0		Nnat	188.226	6.89206	0	0		Isl1	95.1217	4.73186	0	0		Aplp1	54.5059
Ran	62.706	0.832516	0	0		Gcat	271.876	3.59401	0	0		Sox9	162.923	2.32574	0	0		Btg2	110.003	2.64175	0	0		Pax6	139.663	4.05144	0	0		Fam183b	134.349	3.77162	0	0		Ppp1r1a	178.015	6.66241	0	0		Fam183b	93.6414	4.20427	0	0		Rgs17	54.1638
Tuba1b	60.2527	1.28643	0	0		Phgdh	264.599	2.78682	0	0		Atp1b1	162.88	1.97558	0	0		Cotl1	106.386	2.79524	0	0		Map1b	128.105	3.43714	0	0		Gpx3	134.109	4.23932	0	0		Chgb	168.89	4.83091	0	0		Pcsk2	82.0299	5.2503	0	0		Neurod1	53.2127
Ccnb2	58.2104	2.48218	0	0		Tmem97	252.142	3.7852	0	0		Adamts1	157.852	2.47401	0	0		Nkx2-2	102.601	2.55761	0	0		Malat1	121.527	1.54188	0	0		Ttr	131.717	3.19472	0	0		Chga	164.485	5.57398	0	0		Meg3	81.2814	1.71034	0	0		Atp6v0b	49.3867
Hnrnpa1	54.0835	0.822199	0	0		Nupr1	246.289	5.61886	0	0		Gsta3	157.473	2.52561	0	0		Stard10	98.7701	1.62006	0	0		Fam183b	118.976	3.53087	0	0		Isl1	128.658	4.45607	0	0		Ins1	151.951	10.9489	0	0		Sst	79.6143	11.7115	0	0		Rph3al	48.8366
Hmgn1	53.5786	0.730899	0	0		Clps	236.914	4.56609	0	0		Rbp1	146.471	2.19285	0	0		Cyb5r3	97.6515	1.35568	0	0		Neurod1	117.634	3.75996	0	0		Slc38a5	128.058	5.43533	0	0		Scg3	149.96	4.91672	0	0		Cd24a	75.4372	2.26806	0	0		Krt7	48.1549
Hmgb1	52.9285	0.710471	0	0		Rps6	233.903	1.10185	0	0		Bicc1	139.378	2.97684	0	0		Rph3al	97.1466	2.83732	0	0		Cryba2	112.392	4.43552	0	0		Aplp1	126.4	2.95162	0	0		Sec61b	140.888	1.91099	0	0		Iapp	70.4861	6.7246	0	0		Vwa5b2	47.3771
Cd24a	51.6136	0.935525	0	0		Pnliprp1	231.81	5.38694	0	0		Cyr61	130.293	3.11192	0	0		Tmsb4x	96.3936	2.57497	0	0		Aplp1	102.593	2.62263	0	0		Pcsk2	120.207	4.91965	0	0		Fam183b	140.702	4.07804	0	0		Pcsk1n	68.2064	4.0306	0	0		Bex2	45.9277
Hmgb3	51.4909	1.28168	0	0		Ifitm3	231.405	3.65447	0	0		Wfdc2	126.633	1.64024	0	0		Pax4	93.4521	5.27243	0	0		Gch1	101.653	3.58709	0	0		Gnas	117.906	2.14879	0	0		Gng12	136.85	4.4963	0	0		Hhex	67.3403	3.92497	0	0		Hepacam2	45.7162
Birc5	50.8676	1.78851	0	0		Reep5	230.705	3.77764	0	0		Cldn3	126.33	1.49711	0	0		Cd63	92.9357	1.10781	0	0		Pcsk1n	99.0759	3.90534	0	0		Rbp4	116.419	3.81674	0	0		Manf	134.724	2.43446	0	0		Meis2	62.4798	2.69174	0	0		Peg3	44.771
Wfdc2	49.2863	1.27561	0	0		Ldha	224.779	2.59317	0	0		Lurap1l	122.426	2.70277	0	0		Smarcd2	92.5919	2.29886	0	0		Rap1b	98.2281	2.60863	0	0		Tspan7	112.79	2.88578	0	0		Scgn	134.482	4.52531	0	0		Gpx3	62.3131	3.91525	0	0		Cck	43.2579
Ptma	48.8119	0.436458	0	0		Rpl11	222.699	1.0074	0	0		Smtnl2	122.13	2.29566	0	0		Mfng	88.7414	4.48538	0	0		1700086L19Rik	94.9902	4.06939	0	0		Chga	108.15	3.59974	0	0		Pax6	115.833	3.62346	0	0		Hadh	57.5745	2.32915	0	0		Mid1ip1	41.634
Cks1b	47.8841	1.1333	0	0		Rbpjl	221.093	5.31326	0	0		S100a10	117.848	2.39205	0	0		Sox4	88.0503	1.99359	0	0		Tspan7	89.4766	2.51253	0	0		Pax6	100.137	3.31565	0	0		Selk	114.67	1.87641	0	0		1700086L19Rik	55.0984	3.82657	1.58038e-296	1.19085e-294		Tmem59	40.9684
Marcksl1	47.7106	0.889359	0	0		Gstm1	218.344	3.8125	0	0		Col18a1	115.959	2.68399	0	0		Igfbpl1	86.8333	4.73146	0	0		Meg3	89.0442	1.29574	0	0		Scg3	99.6275	3.59363	0	0		Tspan7	114.227	3.07499	0	0		Chga	54.8657	3.38027	2.48478e-299	1.89619e-297		Prnp	40.3857
Cdc20	47.5756	2.48437	0	0		Rpl13	217.81	1.08651	0	0		Tinagl1	112.727	3.51619	0	0		Tubb3	86.2205	4.22169	0	0		Bex2	86.8146	1.75878	0	0		Gcg	96.8165	8.1162	0	0		Pcsk1n	114.226	4.18324	0	0		Cpe	53.3337	2.93701	2.38854e-290	1.73964e-288		Cpe	39.3977
H2afx	44.5282	1.43413	0	0		Cela1	213.517	5.17347	0	0		Hhex	109.153	2.06011	0	0		Gpx2	85.9033	3.22392	0	0		Prnp	86.0767	3.03465	0	0		Map1b	90.9302	2.62959	0	0		Scg2	108.998	5.85893	0	0		Zbtb20	52.1193	3.05785	2.53141e-279	1.74806e-277		Fam183b	38.9753
Rbp1	44.158	1.43436	0	2.67786e-307		Ptf1a	211.464	5.50301	0	0		Dcdc2a	108.705	4.15191	0	0		Marcksl1	84.6243	1.17809	0	0		Cystm1	83.4787	1.73223	0	0		Scg5	90.9027	4.01082	0	0		Atp2a2	107.339	3.4233	0	0		Scg2	51.1692	5.5218	4.88066e-272	3.26677e-270		Cystm1	38.9515
Cdkn1c	43.9927	1.34811	2.50354e-308	2.57467e-306		Rps8	211.161	1.17418	0	0		Pamr1	105.387	2.46783	0	0		Camk2n1	84.2047	3.01954	0	0		Fev	80.3836	5.04137	0	0		1700086L19Rik	90.1551	3.61801	0	0		Sdf2l1	103.806	3.1404	0	0		Tmem27	49.619	4.22737	2.46267e-264	1.60355e-262		Nefm	38.7779
Stmn1	42.9201	1.14673	3.54786e-299	3.38701e-297		Rps3a1	209.684	0.972573	0	0		Habp2	104.68	1.76025	0	0		Dbn1	84.1981	2.59652	0	0		Syt13	78.4928	2.87944	0	0		Pam	89.7342	3.4106	0	0		Calr	103.205	1.69266	0	0		Arg1	49.4636	4.76627	9.82686e-262	6.34693e-260		Mboat4	38.2683
Mdk	42.4991	0.95417	4.48206e-300	4.31321e-298		Gc	209.509	3.16296	0	0		Tax1bp3	101.199	1.51507	0	0		Selm	83.8574	2.83826	0	0		Hepacam2	78.461	3.07934	0	0		Iapp	89.5301	4.75466	0	0		Hadh	103.01	2.41206	0	0		Scg5	49.0816	3.9175	7.96774e-261	5.07774e-259		Cacna2d1	38.1247
Tubb2b	41.4706	2.09333	1.88703e-277	1.71277e-275		Rpl14	209.193	0.851329	0	0		Hpgd	100.782	2.7318	0	0		Tox3	83.6096	3.00068	0	0		Calm2	77.8364	0.95649	0	0		Zcchc18	88.1013	4.25371	0	0		Gpx3	102.814	4.2706	0	0		Chgb	47.5387	3.51997	2.80967e-254	1.71749e-252		Celf3	38.1137
Tubb4b	40.9575	1.28684	2.99342e-275	2.68645e-273		Rpl3	207.346	1.02608	0	0		Ccnd1	98.9142	1.8387	0	0		Krt7	83.0945	2.1782	0	0		Vwa5b2	76.9259	2.99287	0	0		Etv1	86.1353	4.7532	0	0		Prnp	102.8	3.53616	0	0		Itm2b	45.3332	1.46658	2.36677e-240	1.3439e-238		Scgn	38.0165
Knstrn	40.5571	2.20765	1.04286e-267	9.12012e-266		Mif	206.85	1.84922	0	0		Arl4c	98.0617	2.5103	0	0		Cpt2	82.9134	2.22553	0	0		Scg3	75.5751	2.88195	0	0		Abcc8	84.2731	3.32794	0	0		Sytl4	101.271	6.92395	0	0		Pax6	43.6013	3.02885	2.7882e-228	1.48139e-226		Arx	37.848
Ube2s	40.0101	1.13267	1.02072e-265	8.73514e-264		Eif5a	206.737	1.27646	0	0		Col9a1	97.78	2.7893	0	0		Malat1	81.8105	1.04933	0	0		Mid1ip1	75.5518	2.18486	0	0		Scgn	80.2898	3.28911	0	0		Rbp4	101.038	3.05353	0	0		Scgn	43.3983	3.2613	1.5252e-226	7.97964e-225		Gabarapl2	37.8029
Cdca3	39.3051	1.60356	2.61951e-257	2.157e-255		Eef1g	204.898	1.11313	0	0		Dbi	96.3523	1.23903	0	0		Cbfa2t3	81.5094	3.52232	0	0		Cldn4	75.4455	2.55276	0	0		Tmsb15b2	77.7744	5.06011	0	0		Scg5	100.695	4.47902	0	0		Fam159b	42.0402	7.12621	2.97716e-216	1.45887e-214		Prrg2	35.6102
Tubb5	37.9537	0.711703	3.50922e-250	2.76605e-248		Ppib	204.216	1.82988	0	0		Myl12a	96.2344	0.882024	0	0		Foxa3	80.5962	2.15667	0	0		Ypel3	74.8944	2.01345	0	0		Bex2	77.433	1.40207	0	0		Syt13	99.8677	3.24228	0	0		Map1b	40.8602	2.5821	1.83702e-211	8.71659e-210		Ctsf	34.84
H2afv	37.6526	0.722689	1.99681e-243	1.5385e-241		Dctpp1	204.018	2.01935	0	0		Serpinh1	96.2112	0.996322	0	0		Syt13	79.8152	2.67235	0	0		Pim2	74.6088	3.4206	0	0		Chgb	76.8553	3.39797	0	0		Mafb	99.6035	4.22011	0	0		Scg3	38.9542	3.02204	2.9913e-198	1.31277e-196		Tox3	34.8045
Srsf7	37.6522	0.743073	1.00546e-243	7.77187e-242		Cckar	203.51	4.74466	0	0		S100a11	95.3062	1.09623	0	0		Ypel3	79.7238	1.94165	0	0		Pam	73.7369	2.96115	0	0		Tmsb15l	75.9765	4.45671	0	0		Hspa5	98.9773	2.02339	0	0		Tmem59	37.7072	1.1075	9.54858e-192	4.02114e-190		Selm	34.6307
Ccnd1	37.6396	1.54806	2.08477e-240	1.58588e-238		Hspe1	199.52	1.51042	0	0		Acot1	95.1988	1.46824	0	0		Cck	78.6967	4.50428	0	0		Slc38a5	73.2802	3.71187	0	0		Dbpht2	75.6116	3.77016	0	0		Hmgn3	98.9433	2.55846	0	0		Calm2	37.458	0.883306	6.38998e-191	2.67219e-189		Emb	34.5649
Cdca8	37.4623	1.64426	1.55516e-238	1.16818e-236		Dap	198.373	2.14976	0	0		Sphk1	94.2403	2.32258	0	0		Rcor2	78.6709	2.88787	0	0		Tuba1a	72.9355	1.83858	0	0		Peg10	75.5142	5.32824	0	0		Pcsk1	98.3966	4.96038	0	0		Gch1	37.2915	2.69772	2.47803e-187	1.00813e-185		Tm4sf4	34.5298
Ddah2	36.9531	1.4317	2.57849e-233	1.91287e-231		H19	198.337	2.43168	0	0		Cdkn1c	93.416	1.3959	0	0		Ppp1r14a	78.6311	5.70098	0	0		Gnao1	72.6489	3.49064	0	0		Smarca1	75.487	3.50278	0	0		Pdia6	91.7266	1.68087	0	0		Prnp	37.2409	2.78514	6.05704e-187	2.45582e-185		BC023829	34.377
Sparc	35.5183	1.14584	1.98393e-222	1.41065e-220		Vtn	197.973	4.4566	0	0		St3gal4	93.2272	2.65665	0	0		Insm1	78.2992	3.41579	0	0		Gabarapl2	71.8187	1.2937	0	0		Gabarapl2	74.0607	1.27404	0	0		Gabarap	91.6645	1.37013	0	0		Aplp1	37.208	2.14927	1.13143e-187	4.63441e-186		Runx1t1	33.3388
Srsf2	34.0362	0.964032	1.46475e-205	9.69564e-204		Rps2	197.517	1.37233	0	0		Hmga2	91.3645	1.33142	0	0		Mtch1	76.5256	1.86591	0	0		Scgn	71.5532	3.08393	0	0		Mageh1	72.1776	2.42241	0	0		Cryba2	90.7744	3.99512	0	0		Cd200	35.7701	3.74963	1.3256e-176	5.02596e-175		Hmgn3	32.7895
Bex1	32.564	0.919579	3.0916e-191	1.95464e-189		Rps11	196.655	0.975559	0	0		Fmo2	91.0277	3.84797	0	0		Cdkn1a	75.9464	2.46032	0	0		Anxa4	69.6169	1.64479	0	0		Sphkap	70.0746	4.3091	0	0		Tmem27	89.8548	3.79531	0	0		Cirbp	35.3751	1.55352	3.1681e-175	1.19174e-173		Ypel3	32.5724
Vim	32.5427	1.19452	3.23616e-191	2.04065e-189		Fabp5	196.541	2.321	0	0		Cadm1	90.9323	1.66883	0	0		Vasp	75.9223	1.8194	0	0		Emb	69.5944	1.91165	0	0		Resp18	69.7053	4.65286	0	0		Papss2	89.3045	5.00791	0	0		Auts2	35.221	2.74841	3.41715e-173	1.26949e-171		Pax6	32.4758
Anp32b	32.0731	0.674804	2.01954e-188	1.25694e-186		Rps9	196.511	0.838805	0	0		Nudt19	90.4513	1.41273	0	0		Tmem59	74.6755	0.9857	0	0		Cirbp	69.5499	1.46104	0	0		Maged1	68.5704	1.11767	0	0		Ndufa1	89.1539	2.58389	0	0		Ap1s2	34.9307	3.3268	2.85584e-171	1.04796e-169		Gdi1	32.0931
Ccnb1	31.8481	1.57838	1.40631e-183	8.46683e-182		Rpl32	194.213	1.01158	0	0		Mdfi	90.1608	1.84906	0	0		Mfap4	71.6379	4.38529	0	0		Atp6v0b	69.479	1.42687	0	0		Slc25a5	68.4969	1.15786	0	0		Malat1	88.914	1.45271	0	0		Fxyd3	34.3006	2.34591	1.4061e-167	5.06663e-166		Cd63	31.9993
Spp1	31.2961	1.82186	6.96516e-179	4.07071e-177		Ppia	194.024	1.09541	0	0		Fgfr2	89.0647	2.56702	0	0		St3gal6	70.9035	2.51282	0	0		Ubqln2	69.1612	2.2279	0	0		Malat1	68.2008	1.13615	0	0		Cope	88.6816	1.59196	0	0		Klhdc8b	33.895	2.95785	1.90639e-164	6.67851e-163		Elof1	31.9036
Lsm3	31.2863	0.873862	3.16729e-179	1.86016e-177		Cpn1	193.592	2.85099	0	0		Krt18	88.4525	1.03629	0	0		Mpzl1	70.8639	1.91337	0	0		Gars	68.8809	1.70036	0	0		Zbtb20	68.173	2.26507	0	0		Ero1lb	88.3694	4.40321	0	0		Ins2	33.7532	3.48791	1.08058e-164	3.80217e-163		Cxxc4	31.7776
Tacc3	31.1152	1.6952	4.38576e-176	2.50218e-174		Rpl18a	192.598	0.972506	0	0		Spon1	87.9191	3.46152	0	0		Trp53i11	70.8006	3.10195	0	0		Mafb	68.0987	3.71297	0	0		Rnf130	67.6302	2.53625	0	0		Gnas	88.2781	1.7322	0	0		Pam	33.7303	2.81284	1.28207e-163	4.45877e-162		Gnptg	31.483
Id2	31.0362	1.00203	5.28056e-177	3.04165e-175		Rps23	192.595	1.04317	0	0		Mgst1	86.974	1.05717	0	0		Aplp1	70.379	2.04107	0	0		Prrg2	67.3279	2.61005	0	0		Ndn	67.453	2.38532	0	0		Slc30a8	87.5921	6.26374	0	0		Cst3	33.2869	1.54956	8.59374e-161	2.91676e-159		Cd200	31.3292
Tmsb10	30.997	0.482905	1.32159e-177	7.64929e-176		Rps3	192.151	0.923054	0	0		Fxyd2	86.7054	2.63765	0	0		Gdpd1	70.3104	2.52385	0	0		Ngfrap1	66.3642	0.833595	0	0		Trappc2l	67.2603	1.66601	0	0		Ociad2	87.1874	2.84695	0	0		Dbpht2	33.2354	3.2336	2.9446e-160	9.95182e-159		Glud1	31.1639
Tuba1c	30.6448	1.41418	4.74736e-172	2.67033e-170		Gnb2l1	191.013	1.24358	0	0		Eno1	85.3066	0.982597	0	0		Map1b	70.048	2.734	0	0		Gdi1	65.9352	1.89024	0	0		BC048546	66.2998	4.27992	0	0		Ssr2	86.1758	1.19105	0	0		Tuba1a	32.5914	1.59653	1.68339e-157	5.53326e-156		Atp6v1g1	31.0429
Eno1	30.4296	0.720365	6.54837e-172	3.67476e-170		Rpl5	190.658	1.18083	0	0		Col9a3	84.5599	2.11253	0	0		Vwa5b2	69.9998	2.90292	0	0		Eif1	65.6504	0.57664	0	0		Gatsl2	66.0963	3.10166	0	0		Ostc	85.9972	1.43471	0	0		Ndufa1	32.5817	2.01323	3.61014e-156	1.17059e-154		Ubb	30.5885
Tpx2	30.2193	1.82009	1.00711e-167	5.53495e-166		Rpl10	190.163	1.10733	0	0		Tgm2	84.3272	2.32809	0	0		Gfra3	69.9705	3.57219	0	0		Gabarap	65.3034	0.931739	0	0		Ap1s2	65.5876	3.09921	0	0		Fkbp2	85.9267	2.05688	0	0		Frzb	32.3417	4.96663	6.78515e-154	2.16205e-152		Igfbpl1	30.1862
Mdfi	30.1648	1.35655	1.15371e-167	6.32612e-166		Rpsa	189.915	1.20843	0	0		Pdzk1ip1	83.874	1.99358	0	0		2010107G23Rik	69.9094	2.23949	0	0		Dbpht2	64.2339	3.52216	0	0		Lrpprc	65.3248	3.03957	0	0		Cst3	85.7817	1.53257	0	0		App	32.3376	1.75202	8.71491e-155	2.79554e-153		Gch1	30.141
Id3	29.4668	1.35489	2.6321e-161	1.40782e-159		Npm1	189.086	1.29498	0	0		Zfp637	83.7374	1.40365	0	0		Amotl2	69.6688	3.15244	0	0		Isl1	62.8292	3.09016	0	0		Ocrl	65.1392	3.14241	0	0		Ssr4	85.5533	1.89761	0	0		Cplx2	31.5337	2.57022	4.37266e-149	1.35372e-147		Rab7	30.0778
Wnt7b	29.3214	1.99259	3.42628e-159	1.79651e-157		Rps14	188.069	0.812704	0	0		Myl12b	83.5722	0.928846	0	0		BC023829	69.5438	2.71704	0	0		Rph3al	62.6341	2.16059	0	0		Mafb	65.0716	3.17576	0	0		1110008P14Rik	84.7828	3.19256	0	0		Ins1	31.2813	3.43475	4.79229e-148	1.47411e-146		Nkx2-2	30.0676
Srsf3	29.1522	0.567006	1.31469e-159	6.93889e-158		Rpl7a	185.735	1.20304	0	0		Col27a1	83.5078	2.21627	0	0		Gadd45g	69.3706	2.79781	0	0		Ptbp3	61.2958	2.12579	0	0		Prnp	64.878	2.42131	0	0		Uqcc2	84.3898	1.61391	0	0		Hist3h2ba	31.1192	2.02034	1.35788e-146	4.12912e-145		Srp14	29.7818
Hmga2	29.0307	0.928293	3.71752e-158	1.93651e-156		Rps4x	185.295	1.07182	0	0		Actn4	83.1229	1.24216	0	0		Cyth2	69.0049	1.76328	0	0		Atp6v1e1	61.0596	1.38494	0	0		Wnk3	64.8647	5.03633	0	0		Pdia3	83.4815	1.62335	0	0		S100a11	30.6299	1.27433	4.92266e-144	1.46895e-142		Slc38a5	29.6498
Fscn1	28.8869	1.24334	5.10106e-156	2.61738e-154		Rpl7	184.192	0.947945	0	0		Capg	82.1631	2.08634	0	0		Cdk2ap1	66.6752	1.9518	0	0		Krt7	59.4654	1.68181	0	0		Pim2	64.7506	2.96414	0	0		Neurod1	82.789	2.91658	0	0		Ppy	30.4107	5.47044	3.21808e-141	9.33555e-140		Gabarap	29.5644
Hnrnpa2b1	28.8167	0.403564	1.25153e-156	6.46319e-155		Rps18	183.938	0.930603	0	0		Jun	80.4353	1.17262	0	0		Chd7	66.2727	1.91074	0	0		Cplx2	59.2963	2.38245	0	0		Neurod1	64.7077	2.45637	0	0		Hepacam2	82.599	3.38305	0	0		Cd63	30.2399	0.852431	1.19248e-141	3.47619e-140		Npdc1	29.1692
Mif	28.6974	0.658189	2.55809e-156	1.31539e-154		Rpl23	182.594	1.00786	0	0		Hebp1	79.8754	1.60324	0	0		Lingo1	65.8887	3.90052	0	0		Ankrd44	58.7601	2.85298	0	0		Itm2c	64.418	1.84054	0	0		Acly	82.5888	2.25711	0	0		Capsl	30.2169	2.74868	4.03294e-140	1.15733e-138		Dctn3	28.9614
Sfpq	28.6349	0.754556	2.67835e-154	1.35972e-152		Cel	181.509	5.53853	0	0		Ldhb	79.6548	2.11066	0	0		App	65.2321	1.46698	0	0		Zbtb20	58.3014	1.96369	0	0		Trim35	64.2821	2.05388	0	0		Mlxipl	82.1515	4.08844	0	0		Abcc8	30.1616	2.66094	6.24171e-140	1.78477e-138		Eif1	28.7942
Cldn6	28.5421	0.719394	4.91612e-154	2.48523e-152		Srm	180.939	2.56232	0	0		Cxcl12	79.3586	3.13182	0	0		Lrpap1	64.4072	1.50886	0	0		Pcsk2	57.9648	2.8073	0	0		Ubqln2	64.035	1.98537	0	0		Pyy	81.0867	4.07403	0	0		Selk	29.9899	1.06333	1.30411e-139	3.72012e-138		Sin3b	28.7661
Hmgn2	28.4657	0.589906	1.80992e-153	9.09207e-152		Rpl12	180.103	1.3964	0	0		Wnt7b	79.2873	2.39448	0	0		Tecr	63.3904	0.969765	0	0		Celf3	57.1545	2.77861	0	0		Peg3	62.0577	1.0722	0	0		Tmed3	80.4379	1.97924	0	0		Stxbp5l	29.2033	3.84243	2.71124e-133	7.42478e-132		Zdbf2	28.5576
Nde1	28.4044	1.67764	4.7805e-151	2.34735e-149		Rps5	180.029	0.888611	0	0		Hes1	79.1904	1.54998	0	0		Ly6e	63.3758	1.64981	0	0		Mlxipl	56.2792	3.01396	0	0		Irx2	62.0221	5.43572	0	0		Ndufv3	79.059	1.8606	0	0		Ffar4	29.2024	2.61348	1.74568e-133	4.79701e-132		Pyy	28.55
H3f3b	28.2705	0.321347	4.50074e-152	2.22364e-150		Rpl10a	178.743	1.15305	0	0		Nfib	78.3477	1.69634	0	0		Mpc1	62.5997	2.00245	0	0		Gng12	56.1501	2.52267	0	0		Dnajc12	61.5941	2.86083	0	0		Spcs1	78.8951	1.35601	0	0		eGFP	29.1764	4.46926	3.48613e-133	9.52503e-132		Selk	28.1441
Nucks1	28.2626	0.798658	5.88698e-151	2.87885e-149		Ctrb1	178.651	4.85464	0	0		S100a16	78.3244	1.59672	0	0		Lpar6	62.2181	2.13182	0	0		Atp6v1g1	55.9816	0.886721	0	0		Meis2	61.5807	1.9801	0	0		Meg3	78.1098	1.24734	0	0		Runx1t1	29.035	2.71273	1.75998e-132	4.79235e-131		Fhl2	27.8358
Pcbp4	28.1492	1.05074	2.1243e-149	1.02833e-147		Rpl17	178.625	0.98444	0	0		Col2a1	77.9401	2.89625	0	0		Nkx6-1	62.0307	1.70586	0	0		Mapre3	55.8371	2.61283	0	0		Cnot6l	61.3021	2.09855	0	0		Mien1	77.6752	1.75672	0	0		Gnas	28.4512	1.04294	7.01801e-130	1.87475e-128		St18	27.6806
Cks2	28.018	1.13662	2.31604e-148	1.1144e-146		Xbp1	177.472	2.21446	0	0		Marcksl1	77.7923	0.768097	0	0		Tecpr1	61.4738	2.83579	0	0		Zcchc18	55.7282	2.91909	0	0		Scg2	61.129	3.40977	0	0		Dad1	76.5423	1.31123	0	0		Rab3b	27.9791	4.00479	3.55513e-125	9.14034e-124		Ngfrap1	27.508
1700011H14Rik	27.5691	1.11889	1.97539e-144	9.39171e-143		Rps16	176.613	0.866563	0	0		Crip1	77.5999	1.46688	0	0		Marcks	60.2336	1.2768	0	0		Glud1	55.2937	1.68397	0	0		Gnao1	61.1214	2.99237	0	0		Sec11c	76.2126	2.84747	0	0		Emb	27.9562	1.68572	1.3465e-125	3.48433e-124		Rogdi	27.4804
Anxa2	27.5585	1.31704	4.42222e-144	2.09418e-142		Spink1	176.607	4.65764	0	0		Trip6	77.5342	1.57391	0	0		Grasp	59.6115	2.67849	0	0		Dctn3	55.2345	1.04788	0	0		Itm2b	61.0653	1.21429	0	0		Selm	76.1461	2.53877	0	0		Sult1d1	27.8541	5.24375	2.71545e-124	6.89276e-123		Calm2	27.0282
Emc6	27.3812	0.715073	7.72121e-143	3.62776e-141		Rplp1	175.638	1.25879	0	0		Mycn	77.3205	2.53246	0	0		Sh3bgrl3	59.3918	1.36964	0	0		Srp14	54.5314	0.959437	0	0		Dusp10	60.468	3.50605	0	0		Mrfap1	76.069	1.02682	0	0		Gnao1	27.8359	2.86762	1.871e-124	4.75933e-123		Klhl7	26.9751
Dusp9	27.3803	1.2571	2.77591e-142	1.29915e-140		Rpl24	175.614	0.796674	0	0		Vnn1	77.2759	3.47053	0	0		Atp6v1g1	59.1063	0.826222	0	0		Atp6v0d1	54.2642	1.60945	0	0		Uqcc2	59.5964	1.08433	0	0		S100a11	75.8397	1.62786	0	0		Kcnmb2	27.7312	3.89366	1.44158e-123	3.62468e-122		Gnao1	26.9403
Gapdh	27.171	0.514235	3.28084e-142	1.52948e-140		Rps27l	174.641	1.507	0	0		Rbms3	77.1914	1.45523	0	0		Pde1c	58.9476	3.59446	0	0		Runx1t1	54.1535	2.79701	0	0		Cplx2	59.5843	2.3187	0	0		Rab3a	75.5072	3.43792	0	0		Ocrl	27.2543	2.75865	1.37811e-120	3.38343e-119		Chga	26.8561
Mad2l1	26.9711	1.28866	1.19233e-138	5.42137e-137		Rnh1	173.353	1.69247	0	0		Grb10	77.0992	0.870751	0	0		Cdc14b	58.5858	3.04893	0	0		Tm4sf4	54.0906	1.8948	0	0		Ctsz	59.5529	1.63061	0	0		Ddost	75.0353	1.36156	0	0		Mageh1	27.0704	1.96213	1.30993e-119	3.18342e-118		Cirbp	26.853
Serpinh1	26.8968	0.60498	1.64905e-139	7.55537e-138		Rpl8	172.846	0.898956	0	0		Cldn6	76.2237	0.885597	0	0		Gse1	58.2183	2.36001	0	0		Maged1	53.8581	0.973279	0	0		Cst3	59.2816	1.19425	0	0		Hsp90b1	74.735	1.62067	0	0		Golim4	26.8182	2.26904	9.73862e-118	2.33824e-116		Ghrl	26.6229
Polr2m	26.8609	0.668393	2.33744e-138	1.05679e-136		Rpl18	171.14	0.826033	0	0		Tpm1	75.8185	1.14394	0	0		Serinc2	57.7277	2.99772	0	0		Gatsl2	53.6357	2.69012	0	0		Ndufa1	59.2812	1.65102	0	0		Tuba1a	74.463	2.05121	0	0		Npdc1	26.7417	2.23235	2.32673e-117	5.56974e-116		Tmem184c	26.3132
Hnrnpf	26.8061	0.4505	8.23414e-139	3.75107e-137		Rpl13a	171.134	0.819568	0	0		Litaf	75.3298	1.22682	0	0		Ddx5	57.6275	0.692832	0	0		Tmem163	53.6047	4.05198	0	0		Hist3h2ba	59.2643	1.93675	0	0		G6pc2	73.6128	7.1206	0	0		Ypel3	26.7204	1.54519	1.40732e-117	3.37559e-116		Atp6v0d1	26.3116
Cenpf	26.806	1.5874	3.98065e-137	1.78958e-135		Ptma	170.984	0.990488	0	0		Rest	75.214	1.47497	0	0		Ttc28	57.3942	3.11588	0	0		Lrpprc	53.5438	3.1089	0	0		Syt13	59.1869	2.21168	0	0		Tmem258	72.9676	1.54616	0	0		Bambi	26.5688	2.11954	3.284e-116	7.77582e-115		Klhdc8b	26.0255
Hnrnpdl	26.727	0.738426	5.57498e-137	2.49697e-135		Rps10	170.574	1.03608	0	0		Ctsh	74.9844	1.95214	0	0		Tmem176b	57.2683	1.00926	0	0		Mageh1	53.1857	1.99476	0	0		Tuba1a	59.167	1.43493	0	0		Abcc8	71.5388	3.03303	0	0		PISD	26.3086	2.20385	1.97192e-114	4.58462e-113		Trp53i13	25.978
Ccdc34	26.6748	0.81796	1.36107e-136	6.05084e-135		Rps19	170.13	0.858114	0	0		Igfbp5	74.5744	1.90758	0	0		Sult2b1	56.8195	4.772	0	0		Ptprn2	53.0918	2.98467	0	0		Sct	58.4677	3.79417	0	0		Usmg5	71.2869	1.73305	0	0		Resp18	26.0911	3.80943	7.51309e-113	1.71783e-111		Foxa2	25.8454
Lsm4	26.3958	0.526757	4.73985e-135	2.08015e-133		Rps26	169.8	0.955307	0	0		Nrarp	74.4691	2.46141	0	0		Cbfa2t2	56.8016	2.66313	0	0		Npdc1	53.0257	2.07939	0	0		Efcab1	58.1346	2.36639	0	0		Fam151a	71.2581	5.50269	0	0		Mid1ip1	25.9943	1.83245	1.74936e-112	3.9922e-111		Mfap4	25.6644
Lmnb1	26.3924	0.886788	4.90851e-134	2.12306e-132		Rpl19	169.356	0.771361	0	0		Ddah2	74.4436	1.2479	0	0		Tpm4	56.7249	1.40927	0	0		Cnih2	52.9269	3.60854	0	0		Atp6v0b	57.4891	1.23144	0	0		Cd164	71.1823	1.79311	0	0		Sez6l2	25.8951	3.28869	1.34252e-111	3.04059e-110		Mapre3	25.5871
Racgap1	26.3235	1.60754	9.82347e-133	4.18099e-131		Eef1d	167.735	1.21235	0	0		Clic1	74.302	0.798055	0	0		Neurod2	56.7129	6.35709	0	0		Hist3h2ba	52.6513	1.81792	0	0		2210013O21Rik	56.8044	1.5514	0	0		Slc2a2	69.9533	3.53656	0	0		Itpr1	25.7467	3.26721	1.34391e-110	3.02659e-109		Ppp1cb	25.5313
Adamts1	25.7966	1.07585	1.15162e-128	4.76599e-127		Rps17	167.714	0.958825	0	0		Clmn	73.6472	2.84591	0	0		Arf5	56.3672	0.962273	0	0		Selk	52.4674	0.878725	0	0		Tmsb4x	56.4173	1.24738	0	0		Sec61g	69.6327	1.71684	0	0		Anxa5	25.7142	2.04586	1.27213e-110	2.86762e-109		Ids	25.5136
Cited1	25.7196	1.18719	7.82068e-128	3.20889e-126		Rpl4	167.644	0.792376	0	0		Igsf3	73.0029	1.68125	0	0		Rbfox3	56.2901	4.87873	0	0		Slc25a5	52.2925	0.87484	0	0		Irx1	55.5309	5.70075	0	0		Smim14	69.2491	2.01764	0	0		Mrfap1	25.4825	0.649288	7.73694e-110	1.73264e-108		Lrpprc	25.4811
Tead2	25.6616	0.755912	6.43215e-128	2.64369e-126		Chst2	167.5	4.28589	0	0		Mia	71.1174	1.21805	0	0		1110012L19Rik	56.1166	2.20746	0	0		Glul	51.9561	1.66064	0	0		Arx	55.5306	3.65265	0	0		Trappc2l	67.9936	1.83298	0	0		Atp5l	25.2339	1.00029	9.53609e-108	2.08299e-106		Pla2g2f	25.3315
S100a10	25.6219	1.22456	4.94824e-127	2.01307e-125		Rpl36a	167.127	1.13044	0	0		Cited1	71.0296	1.43931	0	0		Numbl	55.9884	3.98045	0	0		Ubb	51.7294	0.760192	0	0		Zdbf2	55.3048	2.53008	0	0		Ece1	67.8138	3.15543	0	0		Ubb	25.1881	0.761266	1.05274e-107	2.29743e-106		1700086L19Rik	25.1603
Dbi	25.1275	0.66618	8.50242e-124	3.39558e-122		Hspd1	166.329	1.51065	0	0		Igf1r	70.9745	1.50428	0	0		Lmna	55.209	1.73332	0	0		0610011F06Rik	51.7124	1.18331	0	0		Npdc1	55.2245	2.1609	0	0		Surf4	67.7686	1.91027	0	0		Selm	25.0625	1.69711	1.09381e-106	2.36126e-105		Pou3f4	25.1112
Sox9	25.1082	0.931434	5.49566e-123	2.19113e-121		Ncl	165.665	1.37244	0	0		Slc28a3	70.9665	2.89804	0	0		Mob4	55.0955	1.22234	0	0		Trim35	51.6527	1.85143	0	0		Ndufv3	55.0961	1.15445	0	0		Ufm1	67.4151	1.92529	0	0		Tshz2	25.0168	2.00993	4.7007e-106	1.01021e-104		Ffar4	24.9405
Ccna2	25.0933	1.24551	1.75222e-122	6.95146e-121		Rps25	164.582	0.937937	0	0		Gpm6b	70.8494	2.10707	0	0		Casz1	55.0783	2.80501	0	0		Fxyd6	51.5085	1.85471	0	0		Cryba2	54.9601	2.23606	0	0		Nucb2	67.1524	3.13839	0	0		H2-D1	25.0031	2.1359	6.40931e-106	1.37616e-104		Fam216a	24.8862
Cnn3	25.0405	0.669904	1.97006e-122	7.80276e-121		Rps15	163.589	0.881711	0	0		Mxra7	70.0042	1.53865	0	0		Stx16	55.0039	1.42198	0	0		Pak3	50.8476	2.75906	0	0		1500011B03Rik	54.2645	1.99664	0	0		Anxa5	67.052	2.4933	0	0		Ramp1	24.9016	4.03363	4.64577e-105	9.91292e-104		Glul	24.5993
Cdkn3	24.95	2.10735	8.63583e-121	3.38124e-119		Rps27a	163.583	0.838141	0	0		Tmsb10	69.4619	0.497398	0	0		Psmd4	54.5595	0.886147	0	0		Hap1	50.7656	2.90713	0	0		Slc7a2	54.1337	4.09992	0	0		Slc35b1	66.9757	2.16645	0	0		Fam46a	24.8791	3.29549	5.87712e-105	1.2518e-103		Btg2	24.5988
Lsm5	24.7784	0.680389	2.88201e-120	1.11926e-118		Rps7	163.549	0.829721	0	0		Serpinf1	69.0259	1.65599	0	0		Gdap1l1	54.4223	2.85209	0	0		Meis2	50.7382	1.53222	0	0		Hap1	54.0803	2.80053	0	0		Atp6v1e1	66.3368	1.65873	0	0		Ssr4	24.7217	1.07289	1.70184e-104	3.612e-103		Prkar1a	24.4964
Ybx1	24.7206	0.54075	1.97278e-120	7.67398e-119		Rpl21	163.35	0.943324	0	0		Slco3a1	68.6084	2.28241	0	0		Txnip	54.3516	1.52433	0	0		1110008P14Rik	50.4631	2.07586	0	0		Ctxn2	54.0024	6.07355	0	0		Atp5l	65.8465	1.44769	0	0		Gabarap	24.697	0.792279	1.67035e-104	3.5483e-103		Ffar2	24.2543
Ranbp1	24.6856	0.48975	4.30225e-120	1.66544e-118		Rpl23a	162.312	0.852065	0	0		Rassf10	68.403	3.12773	0	0		Fgd2	54.1368	1.97257	0	0		Arpc5	50.0172	0.985856	0	0		Hepacam2	53.6637	2.33507	0	0		Guk1	65.784	1.85086	0	0		1500009L16Rik	24.5753	2.49579	4.6286e-103	9.72899e-102		Igsf8	24.253
Pfn1	24.5336	0.386023	2.01347e-118	7.70715e-117		Rnase4	162.191	2.09264	0	0		Sbspon	68.331	3.44139	0	0		Tspan3	54.0399	0.940951	0	0		Camk2n1	50.0155	2.16845	0	0		Ank	53.6145	2.67775	0	0		Gabarapl2	65.6868	1.25628	0	0		Tubb2a	24.4358	2.2286	3.21858e-102	6.73569e-101		Arpc5	24.2403
Raly	24.4799	0.55584	5.76564e-118	2.18948e-116		Asns	161.51	3.34333	0	0		Ppp1r1b	68.0323	4.02322	0	0		Rap1gap2	53.5378	1.77462	0	0		Cacna2d1	49.8528	2.7741	0	0		Ncam1	53.5508	3.62621	0	0		Atp6v0b	65.3556	1.46605	0	0		Calm1	24.1677	0.57695	6.21336e-101	1.28904e-99		Mrfap1	24.118
Kif20a	24.3455	1.81471	8.29563e-116	3.08186e-114		Rpl6	160.585	0.890669	0	0		Trim47	67.8363	3.10074	0	0		Mrfap1	53.167	0.728468	0	0		Tekt2	49.8237	3.33926	0	0		Sez6l2	53.3649	3.30835	0	0		Ap1s2	65.3375	3.33812	0	0		Gabarapl2	24.1451	0.974733	8.95908e-101	1.85707e-99		Gdap1l1	23.9782
Snrpd1	24.3343	0.519211	8.46563e-117	3.16958e-115		Rpl9	159.252	0.717294	0	0		Ncald	67.1977	1.57638	0	0		Mapk3	53.1375	1.17416	0	0		Tox3	49.7583	2.1073	0	0		Gch1	53.1931	2.14379	0	0		Gch1	65.0936	2.68472	0	0		Pak3	24.086	2.49272	5.49429e-100	1.12814e-98		Ap1s2	23.813
Arl6ip1	24.0574	0.742871	4.62063e-114	1.68267e-112		Lrrc59	158.955	2.06508	0	0		Gja1	67.196	1.79072	0	0		Dnaja1	53.1134	0.77937	0	0		Rab7	49.3987	1.16944	0	0		Eif4a2	53.1452	1.01376	0	0		Creld2	64.2319	2.3584	0	0		Efcab10	23.9242	3.83603	9.14519e-99	1.865e-97		Btbd17	23.6678
2810417H13Rik	23.7603	0.807586	2.07582e-112	7.50237e-111		Serpini2	158.86	6.09858	0	0		Lamc1	67.0787	1.50816	0	0		Sulf2	52.7335	2.82072	0	0		Gstz1	49.2174	1.51959	0	0		Prkar1a	51.9923	1.02357	0	0		Pak3	64.1458	3.27675	0	0		Cdh2	23.7355	3.66419	1.5012e-97	3.02285e-96		Pnmal2	23.6589
Mxra7	23.6197	1.24154	5.04598e-110	1.79928e-108		Rps12	157.958	1.32269	0	0		Grb7	66.9748	1.09081	0	0		Rnf114	52.2665	1.67806	0	0		Prdx5	49.043	1.16861	0	0		Dock11	51.9314	4.36437	0	0		Map1b	64.0766	2.28597	0	0		Smpd3	23.6831	4.04116	3.30151e-97	6.61462e-96		Maged2	23.5561
Odc1	23.6138	0.819883	2.40194e-110	8.57755e-109		Mest	157.035	3.05611	0	0		Smoc1	66.9644	1.47696	0	0		Col9a2	52.2664	2.15738	0	0		Rab3a	48.9807	2.37616	0	0		Tmed3	51.2565	1.18389	0	0		Npdc1	63.2583	2.6088	0	0		Nnat	23.6254	2.12391	2.83505e-97	5.68957e-96		Ubl3	23.5546
Col2a1	23.5605	1.72045	1.97888e-109	6.97321e-108		Rps20	156.868	1.07614	0	0		Aldoc	66.9078	2.25991	0	0		Hpca	52.2492	4.33917	0	0		Prkar1a	48.9286	1.01979	0	0		Ubl3	51.1789	1.59813	0	0		Hist3h2ba	63.233	2.26868	0	0		S100a1	23.3519	1.90874	2.79265e-95	5.49856e-94		Sfxn2	23.4702
H1fx	23.5575	1.22536	1.63621e-109	5.77421e-108		Pa2g4	156.208	1.56664	0	0		Sat1	66.7409	1.51174	0	0		Ubald2	51.8296	1.20911	0	0		Cnot6l	48.465	1.73743	0	0		Ypel3	51.1346	1.39993	0	0		Mageh1	62.9648	2.17689	0	0		Ece1	23.2876	2.2822	7.85868e-95	1.541e-93		Pla2g2d	23.321
Kif23	23.4853	1.84719	9.88631e-109	3.43825e-107		Rps24	155.142	0.95378	0	0		Ces1d	66.3579	3.18024	0	0		Ctsf	51.7674	2.17924	0	0		Gck	48.0787	2.48581	0	0		Prps1	51.0037	1.93511	0	0		Emb	62.9137	1.83891	0	0		Pcp4	23.0288	4.57291	5.08279e-93	9.81417e-92		Pam	23.3197
Rbm3	23.4754	0.438617	1.07632e-109	3.80396e-108		Nme1	152.042	1.07566	0	0		Akr1cl	66.2426	3.2674	0	0		Swt1	51.4197	1.91247	0	0		Ap1s2	47.9182	2.56095	0	0		Mid1ip1	50.6583	1.55309	0	0		Ubb	62.5322	1.01526	0	0		Smim22	22.8734	1.51982	2.8074e-92	5.35597e-91		Tox	23.313
Cldn3	23.3783	0.745117	1.80115e-108	6.25496e-107		Rps15a	151.559	0.844091	0	0		Kcnk1	65.8887	1.03022	0	0		Igsf8	51.3542	1.74835	0	0		Ctsf	47.7708	2.0382	0	0		Sdf4	50.5877	1.2064	0	0		Krt7	62.2682	1.66254	0	0		Mlxipl	22.6311	2.49382	1.18118e-90	2.21813e-89		Cryba2	23.2015
Ckap2	23.2855	2.0572	4.90594e-107	1.68419e-105		Rps13	151.32	0.786084	0	0		Cldn9	65.8456	2.54142	0	0		Vps37a	51.2049	1.91639	0	0		Abcc8	47.64	2.16789	0	0		Ngfrap1	50.446	0.621596	0	0		Slc2a5	61.9479	4.53169	0	0		Hepacam2	22.6261	2.13197	1.05022e-90	1.97375e-89		Ptprn2	23.1374
Acat2	23.2568	0.922499	2.92368e-107	1.00513e-105		Prdx6	151.188	1.27942	0	0		Rhob	65.4343	1.23484	0	0		Klc3	51.0524	1.87431	0	0		Nkx2-2	47.2218	1.51492	0	0		Atraid	50.2437	1.30748	0	0		Prss53	61.4718	7.26929	0	0		Scn3a	22.4472	5.49854	2.56688e-89	4.74962e-88		Klc3	23.1221
Snrpg	23.2089	0.468261	2.43792e-107	8.40539e-106		Bex4	150.68	1.46481	0	0		Id2	65.3654	0.97325	0	0		H3f3a	50.269	0.49976	0	0		Klhl7	46.973	1.99464	0	0		Srp14	50.1458	0.872392	0	0		Pdx1	60.8183	1.82547	0	0		Gria2	22.4453	4.25886	2.47901e-89	4.59412e-88		Gfra3	22.8826
Ptms	23.1382	0.714784	2.06193e-106	7.05828e-105		Tmed6	150.461	3.2894	0	0		Enah	65.2926	1.09359	0	0		Tmc4	49.9521	1.29454	0	0		Pdx1	46.9447	1.60442	0	0		Calm2	50.0862	0.633343	0	0		Rpn1	60.679	1.49793	0	0		Bsg	22.3505	0.586237	3.80284e-89	7.00952e-88		Baiap3	22.8098
Fubp1	23.0651	0.592056	5.85121e-106	1.99725e-104		Naca	149.647	0.675682	0	0		Gstt1	64.9346	2.08698	0	0		Glrx3	49.6668	0.800979	0	0		Prps1	46.9204	1.9716	0	0		Camk2b	50.0688	3.11307	0	0		Prkar1a	60.0824	1.289	0	0		Alcam	22.2332	1.83836	3.63803e-88	6.64946e-87		Bambi	22.7859
Snrpb	23.0306	0.404875	6.1871e-106	2.1089e-104		Cldn10	149.017	2.37592	0	0		Cdh3	64.9108	1.91881	0	0		Prdx2	49.6257	0.476023	0	0		Gm43861	46.9013	3.62667	0	0		Tusc3	49.7822	1.65396	0	0		Tmsb15b2	59.9813	3.724	0	0		Bex2	22.1875	0.890286	1.80398e-88	3.30228e-87		Serping1	22.7703
Srsf1	22.8	0.612703	8.50201e-104	2.86533e-102		Matn4	148.179	3.47905	0	0		Ugt2b34	64.8433	1.51314	0	0		Spint1	49.0787	1.17361	0	0		Zdbf2	46.8757	2.31772	0	0		Lrpap1	49.6304	1.33416	0	0		Sez6l2	59.7171	3.85059	0	0		Gap43	22.1839	5.7629	1.18434e-87	2.15483e-86		Lrpap1	22.6388
Lockd	22.6863	1.7569	2.43262e-102	8.08465e-101		Rplp2	147.828	0.840247	0	0		Cdc42ep1	64.7994	1.5286	0	0		Lrrc42	49.0652	1.58888	0	0		Rbp4	46.5992	1.97101	0	0		Pnmal2	49.556	2.55286	0	0		Immp1l	59.0347	1.47771	0	0		Ptprz1	22.1466	7.54867	2.06594e-87	3.75316e-86		Necab2	22.6269
Col9a1	22.6491	1.38419	3.50237e-102	1.16238e-100		Rpl28	147.213	0.924995	0	0		Zfp36l1	64.499	1.19517	0	0		Tpst2	49.0028	1.89332	0	0		Ece1	46.0953	2.20761	0	0		Gast	49.3764	5.18542	0	0		Tmem215	58.8735	8.64159	0	0		Efcab1	21.9784	2.01688	1.46996e-86	2.6424e-85		Pcsk1	22.4849
Tax1bp3	22.6481	0.816764	1.89974e-102	6.32244e-101		Rplp0	147.15	1.07486	0	0		Mboat1	64.2998	1.63832	0	0		Kdm1a	48.9642	1.40967	0	0		Entpd3	46.0564	3.27977	0	0		Rundc3a	49.3428	2.69074	0	0		Rpn2	58.8041	1.34557	0	0		Fkbp2	21.9663	1.26658	1.30765e-86	2.35594e-85		Cer1	22.4788
Fam64a	22.4368	1.7909	2.43879e-100	7.9943e-99		Atp5o	146.998	1.012	0	0		Krt19	64.19	1.33225	0	0		Neurod1	48.754	2.21803	0	0		Rogdi	45.7774	1.57264	0	0		Pak3	49.3198	2.38671	0	0		Srp14	58.7242	1.09132	0	0		Rabac1	21.8937	1.22215	3.7866e-86	6.7915e-85		Gng4	22.446
Pttg1	22.2988	1.23826	2.49559e-99	8.09194e-98		Rpl27	145.64	0.841366	0	0		Errfi1	63.9726	1.42152	0	0		Cplx2	48.5907	1.79059	0	0		Pcsk1	45.673	2.57393	0	0		Slc7a14	48.8597	3.64678	0	0		Saraf	58.678	1.61495	0	0		Tusc3	21.7024	1.52771	7.18558e-85	1.27353e-83		Tmx1	22.3896
Ilf2	22.2827	0.620836	1.2726e-99	4.14884e-98		C1qbp	145.457	1.62619	0	0		Apoe	63.8179	1.24559	0	0		Traf4	48.501	1.47357	0	0		Scg5	45.6058	2.24148	0	0		Tmsb15b1	48.4393	3.78305	0	0		Dnajb9	58.6443	2.81389	0	0		Pnmal2	21.6689	2.38472	1.45974e-84	2.58143e-83		Serinc1	22.3729
Cyr61	22.2795	1.34777	2.70473e-99	8.75819e-98		Smco4	145.359	1.61938	0	0		Nav2	63.7857	1.23197	0	0		Olfm1	48.4335	3.71869	0	0		Ffar2	45.3805	1.56072	0	0		Rab3a	48.2368	2.27846	0	0		1700086L19Rik	58.1267	2.81498	0	0		Atp6v0b	21.588	1.10544	2.79253e-84	4.93107e-83		Cyth2	22.3708
Tpi1	22.2432	0.467371	1.53994e-99	5.01359e-98		Rpl22	145.239	0.99919	0	0		Plekhb1	63.3793	2.04129	0	0		Eif1	48.1352	0.398778	0	0		Rundc3a	45.1306	2.54845	0	0		Prdx5	48.1717	1.12698	0	0		Prps1	57.9271	2.37454	0	0		Usmg5	21.5115	0.954761	7.75353e-84	1.35317e-82		Rbp4	22.2418
Zfp422	22.2062	0.751429	6.57879e-99	2.12741e-97		Atp5g1	145.136	1.09864	0	0		Pebp1	63.2283	0.461327	0	0		Pla2g2f	48.0441	2.97086	0	0		Calm1	45.0871	0.518039	0	0		Slc16a10	48.0775	3.74813	0	0		Minos1	57.9239	0.907313	0	0		Cd164l2	21.302	2.31285	2.837e-82	4.84535e-81		Arg1	22.1697
Acsl5	22.1909	1.08456	1.44156e-98	4.65533e-97		Ran	144.385	1.20698	0	0		Ccnd3	62.8686	0.857248	0	0		Ffar2	47.6545	1.41441	0	0		Plcxd3	45.0713	3.05597	0	0		1110008P14Rik	48.0186	1.94844	0	0		Gjd2	57.5934	4.28744	0	0		Lrpap1	21.0388	1.18237	8.24963e-81	1.3843e-79		Sdcbp	22.1417
Cenpw	22.1434	1.02902	2.72628e-98	8.79234e-97		Gpc3	144.365	1.79583	0	0		Slc38a4	62.7422	1.18858	0	0		Calm2	47.5922	0.628832	0	0		Atp6v1b2	45.0551	1.55814	0	0		Glul	47.9688	1.48909	0	0		Maob	57.3774	4.51988	0	0		Lgals3bp	21.0347	2.18768	1.32935e-80	2.22443e-79		Txndc12	22.0934
Hnrnpab	22.0696	0.513902	4.31935e-98	1.39113e-96		Rpl37	144.336	0.799183	0	0		Zfhx3	62.6032	1.28354	0	0		Nono	47.546	0.66929	0	0		Insm1	44.9173	2.28506	0	0		Gprasp2	47.9021	2.60967	0	0		Uqcrq	57.155	1.0804	0	0		Eif1	20.9562	0.357333	1.52989e-80	2.55642e-79		Tcp11	22.0596
Prmt1	22.038	0.418493	6.88242e-98	2.21068e-96		Nhp2	143.424	1.64822	0	0		Lamb1	62.3512	1.45897	0	0		Cdk4	47.4326	0.564877	0	0		Tmem59	43.8784	0.716953	0	0		Ush1c	47.6517	3.05169	0	0		Ubl5	56.8775	1.08522	0	0		Pcsk1	20.8536	2.3623	1.52556e-79	2.52629e-78		Atp6v1d	21.9685
Nup37	22.0355	1.15959	2.57407e-97	8.24597e-96		Serp1	143.419	1.85791	0	0		P4ha3	62.2444	2.59847	0	0		Fam110a	47.4227	1.9388	0	0		Pnmal1	43.6905	3.05794	0	0		Gdi1	47.5045	1.43402	0	0		Vimp	56.8756	1.60359	0	0		Rai2	20.8261	3.21131	2.89205e-79	4.74652e-78		Gck	21.8234
Hes1	21.9827	1.01428	4.04972e-97	1.29558e-95		Rpl27a	143.001	0.974053	0	0		Krt8	61.9084	0.564053	0	0		Cer1	47.3529	4.46794	0	0		St18	43.4521	3.05904	0	0		Rai2	47.4307	3.69278	0	0		Isl1	56.6998	2.55603	0	0		Gnptg	20.8258	1.84907	2.32581e-79	3.83559e-78		1110012L19Rik	21.8222
Smtnl2	21.9238	1.00379	1.41056e-96	4.50063e-95		Igf1	142.836	4.93258	0	0		Sdc4	61.8663	1.2213	0	0		Cacna2d1	47.264	2.62769	0	0		Baiap3	43.2803	2.85807	0	0		Mapre3	47.3584	2.2296	0	0		Itm2b	56.1397	1.05479	0	0		Pcsk2os1	20.7538	3.08705	7.99007e-79	1.30688e-77		Chmp5	21.6684
Col18a1	21.7512	1.12801	3.29079e-95	1.03483e-93		Bok	142.465	4.16855	0	0		Pafah1b3	61.6257	0.72421	0	0		Krt8	46.897	0.701401	0	0		Chmp5	43.0361	0.981119	0	0		Hexa	47.0496	1.85315	0	0		Ndufb11	56.0835	0.881395	0	0		Ndn	20.7049	1.76004	1.30974e-78	2.13642e-77		Bax	21.6499
Gja1	21.6745	1.2957	1.74134e-94	5.43308e-93		Npm3	142.077	1.54091	0	0		Atp1a1	61.5282	0.822327	0	0		Pclo	46.5146	2.17083	0	0		Ocrl	42.9738	2.27711	0	0		Selm	47.0163	1.58762	0	0		Entpd3	55.6617	3.93705	0	0		Etv1	20.6351	2.5829	3.78476e-78	6.12773e-77		Gars	21.5374
Cnbp	21.6314	0.334865	6.69191e-95	2.09336e-93		Lyar	141.534	1.7967	0	0		Aplp2	61.4882	0.951328	0	0		Tmsb10	46.5056	0.506358	0	0		Nkx6-1	42.8119	1.39089	0	0		Pou3f4	46.978	3.24764	0	0		Camk2n1	55.6328	2.33933	0	0		Ghrl	20.5651	2.33855	6.72516e-78	1.08591e-76		Ddx5	21.4897
Crip1	21.5741	0.936798	6.79423e-94	2.10885e-92		Homer2	141.096	2.1069	0	0		Cnn3	61.454	0.718397	0	0		Gm42637	46.4908	3.34101	0	0		Tubb3	42.7814	2.27463	0	0		Auts2	46.9596	1.85756	0	0		Spcs2	55.4238	0.986967	0	0		Snap25	20.5408	2.90419	1.59223e-77	2.55546e-76		Prdx5	21.3883
Capn6	21.4962	1.42963	4.97907e-93	1.5296e-91		Pabpc1	140.595	1.02499	0	0		Gpt2	61.4384	1.80135	0	0		Acly	46.4841	1.13163	0	0		Nisch	42.5649	1.03205	0	0		Ssr4	46.8372	0.869882	0	0		Gadd45g	54.9641	2.43909	0	0		Vwa5b2	20.476	1.87613	2.75368e-77	4.40185e-76		Ube2b	21.1382
Set	21.4821	0.47407	1.12677e-93	3.48384e-92		Dhx34	140.488	4.36363	0	0		Tcf7l2	61.0695	1.25361	0	0		Stxbp1	46.3019	2.93404	0	0		Usp18	42.2927	3.73967	0	0		Emc10	46.7941	1.06312	0	0		Exoc7	54.3721	2.41998	0	0		Gdi1	20.3411	1.40173	1.90313e-76	3.00809e-75		Tuba1a	21.1236
Mycn	21.4794	1.55611	6.65436e-93	2.03642e-91		Gm8730	140.423	1.32726	0	0		Adamts16	60.5159	4.22658	0	0		C2cd4b	46.3004	3.47366	0	0		Trappc2l	42.1914	1.19115	0	0		Rab37	46.6484	4.01544	0	0		Frzb	54.2321	5.26897	0	0		St18	20.3357	2.88758	2.87532e-76	4.53279e-75		Pim2	21.066
Snrpd3	21.441	0.456834	3.30439e-93	1.01773e-91		Rpl36	140.293	0.806747	0	0		Gpx8	60.4562	1.16803	0	0		St6galnac2	46.2377	2.03651	0	0		Immp1l	42.1352	1.13805	0	0		Vwa5b2	46.4486	1.92196	0	0		Atp5e	53.9989	0.982492	0	0		Cxxc4	20.2781	1.94206	5.68003e-76	8.93663e-75		Tubb3	20.978
H2afy2	21.4271	0.907774	1.07485e-92	3.26848e-91		Edem1	139.707	3.25618	0	0		Vill	60.3037	1.77924	0	0		Hbp1	46.2272	1.3038	0	0		Elof1	42.0789	0.900808	0	0		Atp6v0e2	46.0137	2.48453	0	0		Tssc4	53.9966	1.78904	0	0		Eif4a2	20.2535	0.900529	5.92356e-76	9.31367e-75		Dnaja1	20.9508
Ppih	21.4151	0.772492	1.00558e-92	3.06561e-91		Set	138.814	1.2651	0	0		S100b	60.1483	4.26767	0	0		Plk3	46.0892	5.09813	0	0		Cck	41.7419	2.46612	0	0		Lrp11	45.9107	2.70623	0	0		Cltb	53.8102	1.77836	0	0		Cd47	20.2327	1.46524	9.95664e-76	1.55935e-74		Mob4	20.8122
Bex4	21.3934	0.594993	1.04311e-92	3.17598e-91		Gapdh	137.51	1.16165	0	0		Hnf1b	59.765	1.82997	0	0		Csnk1e	45.9573	1.57377	0	0		Snx15	40.9777	1.87652	5.59164e-304	1.18363e-302		Rogdi	45.8696	1.55108	0	0		Dnajb11	53.6033	1.62792	0	0		Ppp1r14c	20.1585	4.29579	3.90107e-75	6.06997e-74		Lpcat3	20.7837
Cep89	21.2873	1.46058	2.02064e-91	6.07511e-90		Pla2g12a	137.102	1.70791	0	0		Gas2	59.525	2.14344	0	0		Serping1	45.9547	2.76061	0	0		Rimbp2	40.9766	3.00429	9.95978e-303	2.10085e-301		Lgals3bp	45.7897	2.22496	0	0		Smdt1	53.411	0.912128	0	0		Ctsf	20.1551	1.842	2.83489e-75	4.41963e-74		Neurog3	20.7823
Svbp	21.2794	1.01091	1.66226e-91	5.0039e-90		Eef1b2	136.801	1.06872	0	0		Mdk	59.3985	0.775958	0	0		Bambi	45.9273	1.76316	0	0		Dnajc12	40.8447	2.12661	4.85487e-302	1.02135e-300		Dst	45.7837	2.09768	0	0		Meis2	53.1353	1.52254	0	0		Prps1	20.0518	1.74303	1.2684e-74	1.95456e-73		Spint1	20.6296
Bub1b	21.2295	1.53733	5.54649e-91	1.65717e-89		Eif1ax	135.789	1.33045	0	0		Fjx1	59.2945	1.24783	0	0		Atp6v0b	45.7918	0.954775	0	0		Vamp2	40.8374	1.77601	1.55453e-302	3.27614e-301		Cd200	45.6621	2.57295	0	0		Ffar1	53.068	4.94131	0	0		Pgrmc1	20.045	1.1104	1.21396e-74	1.87187e-73		Upp1	20.5582
Sae1	21.1569	0.660418	8.57596e-91	2.55593e-89		Rpl35	135.451	0.97497	0	0		Apoc1	59.2406	1.24435	0	0		Eva1b	45.3364	1.22754	0	0		Serinc1	40.833	1.27115	7.00578e-304	1.48166e-302		Chic1	45.6438	2.85852	0	0		Hagh	53.0189	1.90733	0	0		Ly6h	20.0321	4.67171	2.34657e-74	3.59747e-73		Etv1	20.5392
Rest	21.0621	0.990001	7.19221e-90	2.1198e-88		Tinag	134.948	4.74095	0	0		Adgrg6	58.8807	2.62581	0	0		Ppp3ca	45.1269	1.39922	0	0		Cd164l2	40.7249	2.09496	6.12258e-301	1.27796e-299		Ubb	45.5071	0.694415	0	0		Bex2	52.9207	0.9876	0	0		Syt13	20.0289	1.68803	1.3887e-74	2.13719e-73		Lrrc42	20.5327
Hnrnph1	21.0064	0.605688	1.30898e-89	3.84384e-88		Ccnd2	134.532	1.8591	0	0		Chmp2b	58.8486	1.0975	0	0		Celf3	45.0948	2.32103	0	0		Irf2bpl	40.3856	1.94288	2.7023e-296	5.56771e-295		Pcsk2os1	45.3379	3.31873	0	0		Rpl36al	52.5329	0.886007	0	0		Dync1i2	20.0186	1.28292	1.88084e-74	2.88901e-73		Snx15	20.5227
Tceal8	21.0007	0.542697	1.42454e-89	4.17806e-88		H2afz	134.331	1.32104	0	0		Gas6	58.7825	2.63719	0	0		Rbfox2	45.0769	1.59877	0	0		Hagh	40.2287	1.39768	3.21154e-296	6.60557e-295		Rap1b	45.3051	1.36016	0	0		Lman1	52.0791	1.50311	0	0		Nefm	19.9851	3.12251	3.90778e-74	5.97182e-73		Lrrtm3	20.4684
2610318N02Rik	20.9869	1.37561	3.66197e-89	1.0675e-87		Fbl	133.456	1.31269	0	0		Cyba	58.5954	0.741051	0	0		Cnot6l	44.9916	1.42033	0	0		Ppp2r5b	40.1292	2.67166	1.54018e-292	3.13027e-291		Atp6v1g1	45.2116	0.731368	0	0		Derl2	51.9241	1.94946	0	0		Chic1	19.9783	2.72833	4.31127e-74	6.58423e-73		Yipf4	20.3779
Ywhaq	20.9868	0.325135	9.38975e-90	2.7607e-88		Erp27	133.146	6.04057	0	0		Tspan4	58.4128	1.34989	0	0		Krtap17-1	44.9524	5.1879	0	0		Ffar4	39.8517	1.95105	4.1653e-290	8.42269e-289		Immp1l	45.037	1.06938	0	0		Cox17	51.7985	1.3862	0	0		Mapre3	19.9518	2.05376	5.42429e-74	8.27879e-73		Ghr	20.3486
Nrarp	20.9689	1.51239	5.24072e-89	1.52586e-87		Rpl30	133.145	0.863939	0	0		Ttyh1	58.2399	1.4246	0	0		Npc2	44.8669	0.689216	0	0		Necab2	39.7354	2.3302	2.78313e-288	5.60415e-287		Nap1l5	44.9423	5.31137	0	0		Rab1a	51.5179	1.20635	0	0		Spock3	19.9425	4.03244	8.09721e-74	1.23112e-72		Zcrb1	20.3358
Arl4c	20.9347	1.17413	7.03754e-89	2.04652e-87		Serpinb1a	133.091	3.44174	0	0		Slc2a2	58.2122	1.48963	0	0		Dnajb6	44.7063	0.823697	0	0		Pou3f4	39.6113	3.09955	4.19682e-286	8.37336e-285		Pgrmc1	44.8357	1.15888	0	0		Atp6v0d1	51.5022	1.68935	0	0		Pld3	19.9245	1.53609	7.64966e-74	1.16382e-72		Lmna	20.3141
Erh	20.8191	0.307522	1.06364e-88	3.08934e-87		Cbs	132.652	3.33883	0	0		Fam159a	57.9915	1.88291	0	0		Ubb	44.639	0.575822	0	0		Stx7	39.4865	1.55947	2.44329e-286	4.88291e-285		Mapk15	44.7328	2.45304	0	0		Slc38a5	51.459	2.53728	0	0		Atraid	19.8816	1.16109	1.20411e-73	1.82729e-72		Hagh	20.2433
Rbmxl1	20.7588	0.635275	9.98653e-88	2.8831e-86		Siva1	132.079	1.44951	0	0		Csrp2	57.9057	0.736814	0	0		Tmbim1	44.606	1.9344	0	0		Rasd1	39.4462	2.75953	3.85367e-284	7.63785e-283		Gria2	44.5772	4.69172	0	0		Tmed10	51.4404	0.840408	0	0		Celf3	19.8305	2.06546	2.7749e-73	4.19508e-72		Rbpms	20.2355
Sox11	20.6414	1.4024	1.46559e-86	4.17579e-85		Lsm4	131.807	1.1912	0	0		Ehf	57.8181	2.14638	0	0		Hn1	44.5409	0.788942	0	0		Ddx5	39.3725	0.561958	4.50958e-288	9.07292e-287		Cystm1	44.4437	0.889319	0	0		Cplx2	51.2915	2.24767	0	0		Mast4	19.7855	2.30173	6.25085e-73	9.4203e-72		Fndc3a	20.1716
Ddx39	20.5584	0.688761	3.21257e-86	9.13162e-85		Impdh2	131.739	1.35584	0	0		Efemp2	57.3848	1.44162	0	0		Mmd2	44.5119	2.18918	0	0		Npepl1	39.2915	1.47788	1.44801e-283	2.86754e-282		Ctsf	44.3075	1.88235	0	0		Aplp1	51.1011	1.7258	0	0		Ctso	19.7445	2.48762	1.12202e-72	1.68881e-71		Lrp11	20.169
Anp32e	20.489	0.644935	1.07481e-85	3.04429e-84		Edem2	131.398	2.37652	0	0		Pkhd1	57.1746	2.64034	0	0		Nisch	44.4412	0.948341	0	0		Gnaz	39.2042	2.60982	2.17474e-281	4.26791e-280		Syt7	44.1644	2.5407	0	0		2410015M20Rik	50.9879	1.01645	0	0		BC048546	19.7051	2.7414	1.8626e-72	2.79997e-71		Meis2	20.0904
Dnaja1	20.4097	0.424238	2.91768e-85	8.23479e-84		Gsto1	131.31	1.78088	0	0		Cd24a	57.0794	0.600554	0	0		Mycl	44.2447	3.03294	0	0		Gdap1l1	39.1157	2.16587	1.66892e-281	3.27792e-280		Edn3	44.0048	5.04997	0	0		Rogdi	50.9519	1.88104	0	0		Anxa4	19.6777	1.13394	1.96894e-72	2.95798e-71		Gjd2	19.9835
Cacybp	20.3181	0.50533	1.6317e-84	4.57296e-83		Ppa1	131.253	1.72534	0	0		Arrdc1	57.0097	1.11236	0	0		Cxxc5	44.1125	1.04817	0	0		BC023829	39.0838	1.80515	3.75133e-281	7.35592e-280		Cd81	43.8627	0.759901	0	0		Gfpt1	50.6493	2.16775	0	0		Nenf	19.6105	1.18621	5.69065e-72	8.5012e-71		Gstz1	19.955
Cdc25c	20.3178	1.95496	4.81307e-84	1.34262e-82		Myc	131.19	3.8272	0	0		Hyal2	56.9282	1.01399	0	0		Serinc1	43.9712	1.17161	0	0		Dusp10	39.0398	2.47969	7.78138e-280	1.51962e-278		Runx1t1	43.7527	2.17975	0	0		Usp9x	50.6018	2.01049	0	0		Rab3a	19.6075	1.95954	6.30047e-72	9.40634e-71		Dst	19.9432
Myl12a	20.3011	0.424939	1.77447e-84	4.96727e-83		Rpl41	130.951	0.751475	0	0		Notch2	56.8759	2.07827	0	0		Psmc2	43.9123	0.871146	0	0		Map9	38.9456	2.31203	1.30259e-278	2.52939e-277		Ptprn	43.5985	3.51177	0	0		Mrps33	50.5872	1.14926	0	0		Atp6v1f	19.4053	0.680945	7.95941e-71	1.17731e-69		Gatsl2	19.8724
Psrc1	20.2509	1.49194	1.24347e-83	3.44863e-82		Dlk1	130.531	1.62059	0	0		Lig1	56.841	1.04118	0	0		Rab15	43.7979	3.70695	0	0		Cltb	38.8068	1.2339	4.19181e-279	8.15293e-278		Mbnl2	43.5827	1.20912	0	0		Chmp5	50.56	1.23859	0	0		Gm609	19.2886	3.74756	6.81378e-70	1.00044e-68		B630019K06Rik	19.8586
Tpm3	20.2413	0.485975	6.51665e-84	1.81361e-82		Fkbp11	130.453	3.25719	0	0		Rassf9	56.7749	3.37029	0	0		Lrrn2	43.6303	5.27507	0	0		Apbb1	38.7699	2.15239	1.19174e-276	2.3104e-275		Krt7	43.2682	1.09656	0	0		Krtcap2	50.4719	1.07358	0	0		Tmed10	19.1901	0.743466	1.47474e-69	2.1508e-68		Cplx2	19.8573
Hnrnpk	20.1455	0.293622	2.66316e-83	7.37743e-82		Serbp1	130.095	0.83064	0	0		Nrep	56.7475	0.9248	0	0		Dst	43.5192	1.87244	0	0		Cacna1a	38.6253	2.49142	1.27649e-274	2.45682e-273		Gm1673	43.0254	1.33151	0	0		Enho	50.2629	3.49312	0	0		Camk2b	19.1383	2.57255	4.86358e-69	7.05028e-68		Syne1	19.8496
Hdgf	19.9919	0.5379	4.84751e-82	1.32296e-80		Sephs2	130.035	1.66366	0	0		Snx7	56.5246	1.37443	0	0		Yipf4	43.3387	1.09418	0	0		Uchl1	38.5827	2.06086	1.69089e-274	3.25178e-273		Sesn2	42.8057	2.84609	0	0		Romo1	49.9512	1.09711	0	0		C1qtnf4	19.0995	2.5189	8.42442e-69	1.21973e-67		Pik3r1	19.8141
Ldhb	19.99	1.22993	9.4729e-82	2.57358e-80		Rpl26	129.865	0.897717	0	0		Tshz2	56.5065	1.18843	0	0		Rbm39	43.1601	0.542204	0	0		Tusc3	38.5817	1.29666	5.24031e-276	1.01183e-274		Cd164l2	42.6997	2.07656	0	0		Efcab1	49.8598	2.37511	0	0		Necab2	19.0715	2.28935	1.17135e-68	1.69083e-67		Cldn4	19.7028
Rnf26	19.9553	1.12712	1.68913e-81	4.57344e-80		Rpl31	129.824	0.748609	0	0		Rbms1	56.3987	1.14487	0	0		Shf	43.1578	4.21826	0	0		Ppm1b	38.5552	1.47491	7.24862e-275	1.39623e-273		Snap25	42.4468	2.93067	0	0		Rabac1	49.7708	1.48667	0	0		2010107G23Rik	19.0685	1.57608	1.07074e-68	1.54654e-67		Vps37a	19.6317
Ddx39b	19.9278	0.447291	1.34241e-81	3.6429e-80		Mrpl12	129.486	1.35876	0	0		Sox4	56.3632	0.788037	0	0		Epb42	42.8133	6.45706	0	0		Efcab1	38.3363	1.71964	1.42932e-272	2.72903e-271		Ppy	42.2703	4.34439	0	0		Anxa4	49.6524	1.35552	0	0		Fam92b	19.029	3.04138	2.30475e-68	3.31691e-67		Rundc3a	19.5997
Cenpe	19.9144	1.38235	3.50455e-81	9.45676e-80		Eif3i	129.209	1.04952	0	0		Mmp14	56.1699	1.33356	0	0		Col9a3	42.5398	1.68387	0	0		Akr1c19	38.3187	1.38538	3.89308e-272	7.42723e-271		Gnptg	42.2542	1.75038	0	0		Chic1	49.2806	3.43472	0	0		Gng12	19.0032	1.64713	2.28573e-68	3.29151e-67		Trp53cor1	19.5748
Clic1	19.8911	0.536339	3.02504e-81	8.17204e-80		Pabpc4	128.51	1.92514	0	0		Efna4	56.0807	1.52815	0	0		Tmed4	42.5356	0.886629	0	0		Ids	38.2563	2.45692	2.5798e-270	4.89835e-269		Usmg5	41.7797	0.914398	0	0		Ift20	49.0394	1.33904	0	0		Tspan5	18.9952	2.29002	3.47551e-68	4.98684e-67		Efcab1	19.5557
Ywhae	19.8137	0.256501	8.51485e-81	2.28736e-79		Nop10	127.77	1.1439	0	0		Wfdc10	55.6823	3.63849	0	0		Lynx1	42.3757	4.91809	0	0		Bax	37.9198	0.773271	1.88016e-269	3.55582e-268		Pld3	41.7303	1.44889	0	0		Pdia4	48.6214	1.42725	0	0		Tekt2	18.9794	2.68255	4.3503e-68	6.23457e-67		Tmed4	19.3775
Rdx	19.7813	0.60975	1.9983e-80	5.33815e-79		Spc24	127.511	1.97916	0	0		Capn6	55.6401	1.50937	0	0		Pard3	42.2484	1.52345	0	0		Pyy	37.8552	2.46817	4.84902e-267	9.06336e-266		PISD	41.6068	1.66407	0	0		Chmp2a	48.4579	1.10741	0	0		Aga	18.9435	1.86912	6.7e-68	9.57908e-67		Cltb	19.315
Ldha	19.7376	0.632668	1.95724e-80	5.23431e-79		Anp32b	126.421	1.24039	0	0		Tubb2b	55.6087	1.36025	0	0		Zfand6	42.1271	0.866413	0	0		Lrp11	37.7669	2.3087	8.56286e-265	1.58565e-263		Celf3	41.5877	2.02489	0	0		Myeov2	48.2787	1.20049	0	0		Son	18.9071	0.873248	8.58825e-68	1.22714e-66		Ap2m1	19.2671
Snrpe	19.5896	0.353556	2.89432e-79	7.65493e-78		Reg1	126.373	4.34164	0	0		Camk1	55.4925	1.07824	0	0		Gdi1	42.1118	1.16805	0	0		Cyth2	37.651	1.17705	3.77521e-265	7.00167e-264		Ptbp3	41.5647	1.49783	0	0		Ppy	48.2329	3.89725	0	0		Tm4sf4	18.8376	1.32671	1.99224e-67	2.83817e-66		Irs4	19.1668
Hist1h2bc	19.5741	0.8333	6.58347e-79	1.73355e-77		Rpl36al	126.338	0.890714	0	0		Tmem45a	55.4563	4.30716	0	0		Tmem184a	42.1012	1.534	0	0		Klhdc8b	37.5343	1.84563	2.3352e-262	4.28782e-261		Nenf	41.251	1.10747	0	0		Fkbp1b	47.9576	4.31706	0	0		Enho	18.6452	2.54193	4.03567e-66	5.68172e-65		Rfx6	19.1219
Fkbp4	19.4998	0.381469	1.44618e-78	3.77898e-77		Serf2	126.275	1.06327	0	0		4931406C07Rik	55.4191	1.66635	0	0		Spint2	42.0845	0.56192	0	0		Mien1	37.4678	0.865911	4.401e-264	8.13709e-263		Chmp5	41.2066	0.926857	0	0		Hyou1	47.515	3.23556	0	0		Kctd8	18.6299	4.64443	5.74626e-66	8.06631e-65		Cadps	19.0763
Polr2f	19.3712	0.432617	1.5603e-77	4.04194e-76		Park7	126.127	0.851858	0	0		Ift43	55.0612	1.16232	0	0		Fuca1	41.8768	1.18443	0	0		BC048546	37.1614	2.56525	1.37378e-257	2.49573e-256		Nefm	41.1424	3.3214	0	1.44813e-307		Resp18	47.5001	3.3799	0	0		Cystm1	18.5639	0.827993	7.51042e-66	1.05242e-64		Trim35	19.0752
Lsm2	19.334	0.612188	3.10733e-77	8.03213e-76		Itga6	125.361	2.46105	0	0		Eps8l2	54.9295	1.17162	0	0		2310022B05Rik	41.8766	1.70175	0	0		Mrfap1	36.5742	0.527035	2.84899e-254	5.15615e-253		Pla2g1b	40.6727	4.26559	5.12708e-302	1.1088e-300		Phactr1	46.8429	5.71161	0	0		Sez6l	18.4707	4.50762	4.94438e-65	6.85632e-64		Fxyd3	19.0434
Hnrnpm	19.3237	0.450906	3.20564e-77	8.27732e-76		Krtcap2	125.289	1.42607	0	0		Fam89a	54.7512	1.819	0	0		Prom1	41.8408	1.85601	0	0		Amigo2	36.5654	3.61483	1.69906e-249	3.03148e-248		Cox17	40.6005	1.02207	1.14954e-305	2.51325e-304		Ttr	46.6331	1.1945	0	0		Tmem176b	18.4655	0.819683	3.04888e-65	4.2352e-64		Prox1os	19.0395
Sept9	19.3004	1.00178	8.54087e-77	2.19824e-75		1110008F13Rik	125.255	1.43886	0	0		Pvrl2	54.6409	0.948264	0	0		Steap1	41.5826	3.35497	0	0		Ap2m1	36.4909	0.735048	6.58083e-252	1.18208e-250		Dohh	39.6291	1.16858	2.14875e-292	4.50862e-291		Atpif1	46.5552	0.719332	0	0		Saraf	18.418	1.08095	6.98278e-65	9.66617e-64		Tspan3	18.894
Igf2bp1	19.1888	0.930656	5.40991e-76	1.38348e-74		Ggh	125.1	2.36585	0	0		Hsd17b10	54.5964	0.581229	0	0		Inppl1	41.5748	2.23275	0	0		Dst	36.4837	1.7793	2.80382e-250	5.02132e-249		Celf4	39.5823	2.82711	1.48696e-289	3.08222e-288		Uqcr11	45.7697	0.819785	0	0		Mien1	18.3	0.936467	3.21616e-64	4.42143e-63		Cacna1a	18.8664
Fam136a	19.0596	0.555457	3.08536e-75	7.79045e-74		Ssr1	125.055	1.60849	0	0		Misp	54.4885	1.34993	0	0		Prodh2	41.5045	2.28516	0	0		Klc3	36.385	1.54058	2.42685e-249	4.32681e-248		Ctsl	39.471	1.06228	4.20474e-291	8.76884e-290		eGFP	45.0957	4.30431	0	0		Ncam1	18.2721	2.68009	6.46338e-64	8.83489e-63		Atp6v1b2	18.84
Sumo2	18.9454	0.349335	1.31624e-74	3.2957e-73		P4hb	124.922	1.55071	0	0		Fbxo27	54.4677	2.4629	0	0		Paip2	41.4497	0.602755	0	0		Tpd52	36.3107	0.731815	4.54987e-250	8.13006e-249		Slc30a8	39.443	2.98371	2.33962e-288	4.82461e-287		Pycr2	45.0589	1.30642	0	0		Rnf138rt1	18.2333	3.41683	1.15695e-63	1.57338e-62		Ubqln2	18.8089
Gsta3	18.7885	0.827861	3.23172e-73	7.96691e-72		Ang	124.692	2.68832	0	0		Sox5	54.4541	2.19636	0	0		Casp6	41.4278	1.08907	0	0		Rock1	36.1937	1.23267	2.9728e-247	5.26102e-246		Uchl1	39.4428	2.03765	1.43454e-288	2.96077e-287		Sst	44.8129	3.95104	0	0		Ppp1r17	18.1393	5.70609	4.36569e-63	5.91021e-62		Syt13	18.8081
Kif22	18.6498	1.14796	3.71945e-72	9.02994e-71		Hint1	124.373	0.748174	0	0		4930523C07Rik	54.3985	2.38211	0	0		Tbc1d9	41.3832	3.28602	0	0		Eif4a2	36.0119	0.727558	1.84393e-246	3.25602e-245		Atp5l	39.3847	0.797531	4.21591e-290	8.76163e-289		Dpm3	44.7883	1.42668	0	0		Hexa	18.102	1.57309	5.63692e-63	7.61826e-62		Hap1	18.7667
Efna4	18.6468	1.15234	3.95983e-72	9.6038e-71		Plk2	124.008	1.72219	0	0		2610035D17Rik	54.3409	1.66223	0	0		Gspt1	41.2908	1.07449	0	0		Gpx3	35.9555	1.42863	1.37213e-246	2.42471e-245		Cldn11	39.2877	2.94594	7.61672e-286	1.55727e-284		Snap25	44.5301	3.31924	0	0		Ush1c	17.9564	2.48121	4.42043e-62	5.91414e-61		Vamp2	18.677
Snrpa	18.589	0.515392	6.79107e-72	1.64371e-70		Fam46c	123.713	2.64505	0	0		Zcchc11	54.1242	0.854798	0	0		Prrg2	41.2558	1.53164	0	0		Tmem108	35.8822	2.77197	5.12505e-242	8.93788e-241		Klhl7	39.287	1.65774	1.13724e-287	2.33909e-286		Ndufb2	44.4567	0.987876	0	0		Klhl7	17.7586	1.66873	5.5227e-61	7.24726e-60		Nudt11	18.6421
Hmgcs1	18.5872	1.08202	1.04871e-71	2.52556e-70		Rpl34	123.516	0.762924	0	0		Plod2	54	1.68964	0	0		Ube2b	41.2465	0.650564	0	0		Fam216a	35.6978	1.16208	1.113e-241	1.9368e-240		2610524H06Rik	39.1131	1.24185	1.07103e-285	2.18789e-284		Sphkap	44.384	3.17816	0	0		Fxyd6	17.7585	1.44982	5.35559e-61	7.03181e-60		Nisch	18.5785
Exosc8	18.5815	0.733227	9.23876e-72	2.22716e-70		Atp5b	122.304	0.73271	0	0		Fras1	53.9503	1.49264	0	0		Spsb4	41.1503	1.84066	0	0		Hdac6	35.6357	2.16008	1.61483e-239	2.78779e-238		Chmp2a	39.1013	0.823612	1.50418e-287	3.09117e-286		Nkx6-1	44.3008	1.42832	0	0		Gm43861	17.6953	2.65763	1.42364e-60	1.86107e-59		Marcks	18.5623
Srsf5	18.5326	0.455996	1.71697e-71	4.11832e-70		Ptn	121.508	1.74996	0	0		Clu	53.945	1.14306	0	0		Ubl3	41.0764	1.17504	0	0		Tcp11	35.616	2.72973	4.94464e-239	8.53013e-238		Ffar4	38.9348	1.80262	8.05298e-283	1.6284e-281		Tubb2a	44.0539	2.23046	0	0		Tspan8	17.6293	4.14653	3.74968e-60	4.86991e-59		Alcam	18.5472
Kif2c	18.5153	1.66029	4.08139e-71	9.75057e-70		Ifrd2	121.077	2.2057	0	0		Kifc3	53.9301	1.91569	0	0		Megf11	41.0036	5.96788	0	0		Cd164	35.6135	0.931776	2.69197e-241	4.67428e-240		2410015M20Rik	38.8799	0.703186	1.46423e-284	2.9835e-283		Glul	44.0238	1.49686	0	0		Stk32a	17.4665	4.88233	3.27382e-59	4.19504e-58		Atp5l	18.5285
Tcf3	18.47	0.618043	4.98521e-71	1.1898e-69		Prdx4	120.942	1.34354	0	0		Cxadr	53.9087	1.01648	0	0		Atxn7l3b	40.8031	0.635485	0	0		Lhx1os	35.4655	3.45017	6.16682e-237	1.05776e-235		Dpp4	38.7422	2.73076	6.53589e-279	1.31167e-277		Fkbp1a	43.9905	0.780542	0	0		S100a13	17.4491	2.05019	3.6607e-59	4.68485e-58		Dusp10	18.5096
C330027C09Rik	18.4282	1.55719	1.6098e-70	3.8268e-69		Nt5dc2	120.746	1.44255	0	0		Tmem116	53.8998	2.22683	0	0		Actg1	40.7932	0.811901	0	0		Vdr	35.4635	3.55285	7.54036e-237	1.29243e-235		Asb4	38.7129	3.94132	5.34447e-278	1.06631e-276		Magt1	43.9091	1.44767	0	0		Atpif1	17.4454	0.458383	2.68812e-59	3.45562e-58		Psmd4	18.4559
Kcnk1	18.269	0.711592	1.41416e-69	3.33853e-68		Eef1a1	120.47	0.733986	0	0		Crb3	53.8718	0.748631	0	0		Ndrg1	40.6326	1.35522	0	0		Ubl3	35.2551	1.19263	1.21018e-236	2.0713e-235		Itpr1	38.5164	2.5864	1.95649e-276	3.89058e-275		Ndufa11	43.8925	0.820665	0	0		Ssr2	17.4196	0.641172	3.76934e-59	4.81969e-58		Kdm7a	18.4335
Galk1	18.2423	0.572089	1.51373e-69	3.56657e-68		Tomm5	120.384	1.2701	0	0		Scara3	53.7975	3.61153	0	0		Miat	40.6159	4.36119	0	0		Sh2d3c	35.2462	2.24727	5.34695e-235	9.12561e-234		Gabarap	38.265	0.603275	1.15895e-278	2.32391e-277		Rab27a	43.7143	3.30892	0	0		Ucp2	17.4104	1.22651	5.3007e-59	6.75614e-58		Saraf	18.2899
Rxrg	18.2236	1.57772	4.11116e-69	9.62969e-68		Fam162a	119.039	1.42548	0	0		Ajuba	53.7928	2.3618	0	0		Clta	40.4574	0.640443	0	0		Kcnmb2	35.2193	2.88172	1.98948e-234	3.3882e-233		Tm4sf4	38.2407	1.47473	3.40075e-275	6.74577e-274		Cd63	43.6493	0.789297	0	0		Sec61b	17.3354	0.523643	7.89922e-59	1.00628e-57		Rem2	18.1978
Hbb-y	18.1753	2.2965	1.05057e-68	2.44643e-67		Acaa2	119.036	1.54053	0	0		Deb1	53.7846	0.823759	0	0		Slc39a2	40.4487	4.89405	0	0		Snap25	34.9849	2.48225	3.98081e-232	6.72222e-231		Ctso	38.1152	2.23235	5.83115e-272	1.13691e-270		4833439L19Rik	43.6208	1.72544	0	0		Pla2g2f	17.2897	2.45223	2.96017e-58	3.753e-57		Ppp2r5b	18.1763
Hbb-bh1	18.1306	5.33686	2.38142e-68	5.5134e-67		Rpl38	118.847	0.857541	0	0		Rps19	53.2335	0.286925	0	0		Drap1	40.2996	0.942124	0	0		Vps37a	34.8752	1.58346	1.51615e-231	2.55126e-230		Gnai2	38.0942	0.856229	1.42266e-274	2.81501e-273		Tm4sf4	43.5954	1.81029	0	0		Acly	17.2332	1.15838	5.26784e-58	6.64358e-57		Cnot6l	18.0778
Dek	18.0908	0.535403	1.58608e-68	3.68271e-67		Dnajc3	118.783	1.63259	0	0		Sept9	52.9666	1.18861	0	0		Ldb1	40.2512	1.45731	0	0		1500011B03Rik	34.8516	1.39657	1.54988e-231	2.60619e-230		Atp6v1f	38.0745	0.616072	1.43078e-274	2.82873e-273		Enpp2	43.3614	2.50854	0	0		Tmem108	17.2321	2.61171	6.46541e-58	8.1325e-57		Sms	17.9531
Srsf6	18.015	0.40728	5.66984e-68	1.30761e-66		Ybx1	118.359	1.14166	0	0		Tpm3	52.9294	0.549429	0	0		Kirrel2	40.0933	2.21132	0	0		Cxxc4	34.7471	1.62127	5.6162e-230	9.37155e-229		Ppp1r1a	38.0543	2.21746	7.99516e-273	1.56392e-271		Ndufs5	43.3591	0.975878	0	0		Nagk	17.0773	1.49259	4.36188e-57	5.44088e-56		Ndrg1	17.9308
Tmed9	17.9454	0.429439	1.79503e-67	4.10424e-66		Rpl22l1	118.219	0.927739	0	0		Fn1	52.9244	1.68325	0	0		Cox7a2l	40.038	0.563056	0	0		Usp9x	34.6953	1.41459	1.99964e-229	3.32977e-228		Akap17b	38.0149	2.7803	2.88832e-270	5.59498e-269		Slc7a2	43.3327	3.44305	0	0		Slc16a10	17.0224	2.76217	1.00728e-56	1.2493e-55		Atp6v1f	17.9193
Hba-x	17.932	4.22443	5.2713e-67	1.19613e-65		Arhgdig	117.519	4.18593	0	0		Lifr	52.9128	1.68329	0	0		Rasl11b	40.0243	2.64586	0	1.15083e-307		Gfra3	34.4544	1.88346	5.42178e-227	8.92899e-226		Baiap3	37.9487	2.50095	6.48515e-270	1.25219e-268		Cox6a1	43.2931	0.588727	0	0		Pea15a	16.9702	1.64453	1.84087e-56	2.27846e-55		Atp6ap1	17.9037
Scd2	17.898	0.652326	3.65949e-67	8.32751e-66		Banf1	116.676	1.2163	0	0		Tgif1	52.7451	1.15984	0	0		Cnot7	39.7321	1.01009	3.11712e-308	8.10994e-307		Gjd2	34.2344	2.622	1.8329e-223	2.98572e-222		Map3k15	37.9197	3.45994	1.29163e-268	2.47998e-267		Dnajc3	43.2282	1.35799	0	0		Zdbf2	16.9442	1.77848	2.45165e-56	3.02973e-55		Scg3	17.8847
Trim28	17.8234	0.56559	1.40073e-66	3.15157e-65		Eif3m	116.603	0.986632	0	0		Tnfrsf12a	52.3873	1.46162	0	0		Myt1	39.5372	2.84204	1.27755e-302	3.26014e-301		Sesn2	34.1899	2.33956	6.02836e-223	9.79332e-222		Ncoa7	37.8621	2.48169	1.73304e-268	3.31951e-267		Atp6v0e2	42.9666	2.59629	0	0		Chmp5	16.9093	0.894429	3.45844e-56	4.26512e-55		Abhd15	17.824
Nudt21	17.7797	0.443719	2.30944e-66	5.17669e-65		Eif4ebp1	116.327	1.6935	0	0		Adamts9	52.3148	1.10654	0	0		Upk3bl	39.5371	4.24564	9.80378e-302	2.48591e-300		Pax4	34.0559	2.21364	3.92956e-222	6.36648e-221		Ghrl	37.7041	3.95713	6.91901e-266	1.31478e-264		Spock2	42.8808	3.50102	5.19157e-308	1.17248e-306		Romo1	16.8933	0.749304	4.14809e-56	5.10512e-55		Ttll7	17.7766
Fam89a	17.6969	1.27843	1.41001e-65	3.11685e-64		Sdpr	116.042	2.73777	0	0		Adk	52.2344	0.762129	0	0		Smarce1	39.5323	0.759941	1.31587e-306	3.40507e-305		Gnb2	34.0158	0.55801	6.0467e-223	9.81647e-222		Pja2	37.6554	1.40437	1.39405e-267	2.66594e-266		Zcchc18	42.8388	2.34967	0	0		Srp14	16.8089	0.698341	1.20496e-55	1.47463e-54		Prox1	17.7447
Gt(ROSA)26Sor	17.6669	0.972187	2.14202e-65	4.7089e-64		Car9	115.951	3.0604	0	0		Gjb1	52.0718	1.12588	0	0		C2cd4c	39.2679	4.38602	3.86991e-298	9.67961e-297		Ttll7	33.9481	2.06671	1.47727e-220	2.37733e-219		Atp6v1b2	37.6081	1.26541	2.061e-267	3.93826e-266		Srpr	42.8303	1.41913	0	0		Rundc3a	16.7342	2.04368	3.89524e-55	4.72835e-54		Usp29	17.7359
Cyb5a	17.6517	0.482038	1.74435e-65	3.84528e-64		Zfp706	114.886	1.01731	0	0		Osgin1	51.9919	2.63974	0	0		Top1	39.2205	0.74515	6.5195e-302	1.65488e-300		Dynlt1c	33.9291	1.35079	1.11297e-220	1.79228e-219		Mien1	37.5361	0.871825	1.03852e-267	1.98762e-266		Pofut2	42.7478	1.57288	0	9.23229e-308		Cltb	16.7284	1.19008	3.82913e-55	4.65046e-54		Uchl1	17.7354
Bub1	17.6349	1.50243	4.08475e-65	8.95507e-64		Prss23	114.732	1.99959	0	0		Nit2	51.8586	0.69605	0	0		Kdm5b	39.1675	1.13663	2.8357e-300	7.13751e-299		2210013O21Rik	33.8113	1.03809	6.45036e-220	1.03664e-218		Dctn3	37.4624	0.753348	5.87344e-267	1.12054e-265		Trpm5	42.6013	6.81018	7.49563e-304	1.6786e-302		AW551984	16.6371	3.76411	1.54177e-54	1.85928e-53		Nt5c2	17.6861
Ctnnbip1	17.5992	0.701259	5.14585e-65	1.12607e-63		Rexo2	114.627	1.72567	0	0		Ezr	51.4862	0.798725	0	0		Actb	39.1446	0.49482	1.17395e-303	3.0118e-302		Pcyt1b	33.6241	2.88578	3.00352e-216	4.76625e-215		Mrfap1	37.2919	0.498984	1.36498e-266	2.59997e-265		Npy	42.5373	7.84074	4.24945e-303	9.47213e-302		Ctsl	16.5906	0.914025	2.05058e-54	2.4679e-53		Stx7	17.6837
Plpp2	17.5972	0.949673	6.23204e-65	1.36252e-63		Bmp7	114.459	1.95648	0	0		Flna	51.4594	1.41002	0	0		Gm8773	38.9817	6.23853	5.19289e-294	1.26971e-292		Napa	33.5526	0.816906	2.22214e-217	3.54035e-216		Klhdc8b	37.2283	1.77063	7.23571e-262	1.35773e-260		Pclo	42.4019	2.4569	9.598e-304	2.14741e-302		1810037I17Rik	16.5798	0.752057	2.3937e-54	2.87652e-53		Trappc2l	17.6247
Hhex	17.5521	0.785834	9.40459e-65	2.05239e-63		Mt1	114.444	2.22788	0	0		Syne2	51.3568	1.01318	0	0		Gabarapl2	38.9538	0.69652	1.77399e-299	4.45579e-298		Rbm39	33.5417	0.502779	5.41677e-218	8.65888e-217		Cltb	37.0183	1.16026	1.63159e-260	3.04963e-259		Arhgap36	42.1448	6.73872	8.12952e-299	1.77899e-297		Smim14	16.5762	0.990586	2.43015e-54	2.91756e-53		Jam3	17.5984
Rhob	17.5226	0.802406	1.81483e-64	3.95336e-63		Mgst1	114.4	1.38646	0	0		Prkra	51.3132	0.864006	0	0		Rfx6	38.9436	2.62095	6.10832e-295	1.50894e-293		Fndc3a	33.5199	1.19198	1.58592e-216	2.52002e-215		Rabac1	37	0.97593	1.23993e-260	2.31938e-259		Il1r1	41.9846	4.12696	1.29043e-297	2.80592e-296		Rogdi	16.4838	1.27938	8.95116e-54	1.06393e-52		Rap1gap2	17.575
Pkm	17.4935	0.395277	2.41419e-64	5.24945e-63		Rpl15	114.053	0.898647	0	0		Emp2	51.3035	1.54985	0	0		Zfp703	38.8741	1.61853	7.15785e-295	1.76457e-293		Cadps	33.466	2.68964	1.18668e-214	1.87197e-213		Slc14a2	36.9438	4.33202	1.34046e-256	2.45755e-255		Cib2	41.948	2.88897	5.83651e-298	1.2714e-296		1500011B03Rik	16.4112	1.40362	2.33762e-53	2.74848e-52		Rock1	17.5158
Eif4a1	17.4671	0.257304	2.97028e-64	6.45275e-63		Ranbp1	113.979	1.04298	0	0		Bex1	51.2306	0.604421	0	0		Pla2g2d	38.5132	2.03381	1.33349e-289	3.19531e-288		Ankrd54	33.4386	1.46269	4.39489e-215	6.94201e-214		Ptprn2	36.7997	2.14671	1.81364e-256	3.3149e-255		Kcnmb2	41.9447	3.43463	9.74507e-298	2.1209e-296		Insm1	16.2546	1.75254	1.68911e-52	1.95812e-51		Card19	17.501
Rbm8a	17.4599	0.381788	3.62826e-64	7.86792e-63		Aldh1b1	113.813	1.77068	0	0		Eva1a	51.2213	2.2675	0	0		Pkib	38.4703	3.15793	5.59134e-288	1.33579e-286		Gnai2	33.4332	0.811485	3.7609e-216	5.96417e-215		Tmx1	36.7763	1.05596	2.22293e-257	4.10369e-256		Mapre3	41.8716	2.21742	1.42514e-298	3.11296e-297		Chmp2a	16.24	0.78339	1.84426e-52	2.13489e-51		Pnmal1	17.445
Mrpl42	17.4366	0.407645	4.20655e-64	9.11367e-63		Galk1	113.803	1.47151	0	0		Rxrg	51.1896	2.00594	0	0		Tmem206	38.1648	1.93982	4.52724e-285	1.07195e-283		Atp5l	33.4021	0.782691	4.05671e-215	6.41206e-214		Usp9x	36.6705	1.36853	1.26847e-255	2.31493e-254		Tomm7	41.7637	0.993219	5.31499e-300	1.16842e-298		Tshz1	16.2391	1.61072	2.20323e-52	2.54673e-51		Calm1	17.4257
Chtf8	17.4279	0.707818	7.53309e-64	1.62766e-62		Slc38a3	113.74	3.82074	0	0		Onecut1	51.072	1.69113	0	0		Dennd2a	38.0907	2.43553	1.77319e-283	4.15339e-282		Stat3	33.3724	1.90898	4.39679e-214	6.91311e-213		0610011F06Rik	36.469	0.84277	2.28965e-254	4.16904e-253		Golgb1	41.7343	1.39743	3.86821e-298	8.43404e-297		Lmo7	16.1853	2.69291	4.73296e-52	5.43677e-51		Map9	17.3726
[truncated: 284 more rows]
[truncated: 3 more columns]
