# Supplementary material for: A multimodal cross-species comparison of pancreas development
Source: Research Square preprint supplement (doi:10.21203/rs.3.rs-4151759/v1), 2024-04-03
Supplement: Supplementary file 8 [file b8d4d52698684db6549ca94d.xlsx]

## Sheet: Sheet Content
Supplementary Table 7: CellOracle inferred GRNs of the pig beta subclusters
Sheet1: Filtered GRN of pig Beta,0
Sheet2: Filtered GRN of pig Beta,1
Sheet3: Network scores of the TFs in Beta clusters

## Sheet: Sheet1
Sheet1: Filtered GRN of pig Beta,0
ID	source	target	coef_mean	coef_abs	p	-logp
377334	MEIS2	TTR	-30865052	30865052	0.00103364	169856324819841
377284	CDX2	TTR	-26003674	26003674	9813.12	100081929770241
55598	LMX1A	CHGB	21887949	21887949	0.147026	148326058665973
117226	EGR1	FOS	2114304	2114304	0.000123035	169099697731482
377291	NEUROG3	TTR	-20900273	20900273	0.0172675	157627704446483
377256	SIX6	TTR	-19199997	19199997	20.2791	126929503560039
117337	JUNB	FOS	16929096	16929096	46.7936	123298135927056
377270	RFX6	TTR	-15858953	15858953	174.231	117588754752174
377302	HSF1	TTR	14471725	14471725	32.8006	124841184422349
126154	MEIS2	G6PC2	14354564	14354564	0.000345263	174618504947126
377257	ATF1	TTR	14330421	14330421	4.99075	133018338245718
55641	MAFA	CHGB	-13974227	13974227	0.0165993	15779910396725
55505	SOX5	CHGB	12849069	12849069	131.707	118803904334436
9609	IRF7	ALDOB	12251744	12251744	0.00651071	161863716567301
9405	ASCL2	ALDOB	12189288	12189288	1.61822	137909616732432
377328	PPARA	TTR	11934127	11934127	0.0398631	153994290675851
55430	EGR2	CHGA	-11858414	11858414	0.122334	149124512198547
377289	FOXA2	TTR	-11802723	11802723	3996.66	10398302479407
377252	MEF2B	TTR	11534633	11534633	0.559722	142520279139676
306781	BCL11A	SCGN	-11256315	11256315	15.5587	128080266876739
306786	SIX6	SCGN	110589154	110589154	27.8254	1255555783344
378051	RORC	TXNIP	10990047	10990047	0.00559969	162518358275069
207061	NR4A2	MDK	108095974	108095974	2.73656e-08	215627957429106
377255	NR4A3	TTR	-107538566	107538566	2.45106	136106467112508
13588	CREB3L2	ANXA2	10753665	10753665	0.00142693	168455969894525
177207	EGR1	JUNB	104613595	104613595	1.06623e-06	19972148391269
306792	EGR1	SCGN	-104417495	104417495	0.00120268	169198486263967
79605	ETV1	DIRAS3	10389843	10389843	2.82746	135486041788503
306180	ZEB1	SCG2	10355435	10355435	0.00245532	156098926567848
309737	TFDP2	SELENOM	10339835	10339835	2.01969e-07	206947152175515
55412	NEUROG3	CHGA	10048009	10048009	96522.3	901537220461871
306809	KLF15	SCGN	-10022793	10022793	80.179	12095939364385
377313	MITF	TTR	9967373	9967373	4.70897	123270742843605
377318	RARG	TTR	-98736376	98736376	517.668	112859484748963
377304	NEUROG1	TTR	-9843341	9843341	444945	735169386438477
55469	MAX	CHGA	98086864	98086864	0.0535843	152709623164886
55632	RORC	CHGB	9548732	9548732	0.0627647	152022848398392
378079	NR4A2	TXNIP	9534789	9534789	0.000476356	173220685652981
13742	RORA	ANXA2	9328689	9328689	0.639891	141938941103382
13721	FOXN3	ANXA2	-92868105	92868105	0.00129333	158882918400929
139703	NR4A2	GPX3	9224604	9224604	361.108	114423631720637
65498	MEIS2	CPB2	-9217031	9217031	1.57615	138024024689042
79491	NR1H4	DIRAS3	9211097	9211097	16.2652	12788739863805
55570	HNF4A	CHGB	9121078	9121078	1.17356	13930495082461
100444	TFDP2	EMB	9116526	9116526	8.87284e-06	190519375703714
95885	FOS	EGR1	9053837	9053837	5.58484e-05	182529895767864
306848	ZNF250	SCGN	895586	895586	0.000326626	17485949245624
13670	TFDP2	ANXA2	-88935845	88935845	12.3685	129076844771226
377261	NEUROD1	TTR	8882199	8882199	8.25942e+07	608305027557365
139680	TFDP2	GPX3	8858166	8858166	0.319048	144961445171964
55714	SIX6	CHIA	8843345	8843345	0.0424783	153718325488072
139652	GATA4	GPX3	8839244	8839244	8.06744e-05	180932643107039
306132	PDX1	SCG2	88264994	88264994	6.28054	132020028452247
65608	FOXN3	CPE	-8719795	8719795	0.0269538	155693800523388
377243	TGIF2	TTR	-86280614	86280614	0.473613	143245765870753
377301	NR2F2	TTR	-8522456	8522456	3.67473e+06	743477430405815
55413	IRF3	CHGA	85032955	85032955	20.3327	126918040725483
57696	PAX6	CITED1	8500962	8500962	0.358524	144454818995961
20198	NR1H4	ASB9	-8465135	8465135	0.0584204	152334352073492
377253	ZNF331	TTR	8455654	8455654	4.34147e-06	193623633660519
309695	EGR1	SELENOM	-84478036	84478036	0.0520585	152835079847039
65469	IRF7	CPB2	8352286	8352286	0.454915	1434207002441
55553	KLF15	CHGB	8322797	8322797	337.339	114719336903375
13578	PAX6	ANXA2	82865044	82865044	9.37048e-06	190282380458624
57758	NR4A2	CITED1	8200457	8200457	0.000196685	17706229533487
377288	RFX1	TTR	8194345	8194345	57.9808	122367159512977
276331	TFDP2	PPP1R1A	8180513	8180513	0.0571339	142431064908485
55481	JUNB	CHGA	81426084	81426084	51.1151	12291450564463
88865	FOS	DUSP1	8117329	8117329	14.8181	128292064841428
65536	PAX6	CPE	8055806	8055806	0.276254	145586909674555
55375	FOS	CHGA	8027732	8027732	1277.26	10893721120151
380925	RORC	UPK3A	8002527	8002527	16.7116	127769806712375
57728	NEUROG3	CITED1	-7991115	7991115	0.00322888	144909487305535
217126	NR3C2	MT3	79728216	79728216	215.508	116665357758016
377295	MEF2C	TTR	-7964478	7964478	1.11489	139527677918927
377281	CTCF	TTR	7945625	7945625	507.813	112942960230813
306038	NKX6-1	SCG2	79426	79426	0.355998	144485519569223
306763	TFDP1	SCGN	7932008	7932008	38.7191	124120749013176
377306	RORC	TTR	-7893461	7893461	965601	701520223414372
55473	PAX4	CHGA	788377	788377	35682.1	944754962213721
55452	FOSL2	CHGA	-785322	785322	233.721	116313026757276
55440	ATF3	CHGA	-7833239	7833239	1.39663e+06	785491856973304
217130	RORC	MT3	77898525	77898525	0.0149019	148267582631886
306143	CREB3	SCG2	7779133	7779133	13.5596	128677533370717
209081	ZNF385D	MEIS2	7764647	7764647	5.04225e-05	182973756819271
306495	BBX	SCG5	77532925	77532925	0.136807	14863891345909
306806	BBX	SCGN	77487946	77487946	0.0206536	156850033470543
377247	SNAI2	TTR	-7724992	7724992	1.25553e+07	690117307079605
13591	BBX	ANXA2	7711463	7711463	0.0695839	151574915221128
380945	KLF10	UPK3A	76973945	76973945	0.0617221	142095593221493
55464	FOXN3	CHGA	767945	767945	41.4059	123829380352435
20215	CREB3L2	ASB9	7522819	7522819	0.813752	14089508182082
217031	SOX5	MT3	75139605	75139605	1.51202	13820442010052
103740	THRB	ESM1	7502005	7502005	0.000150672	17821967132317
20189	SIX6	ASB9	7498884	7498884	42.6017	123705726332259
103132	TCF4	ERO1B	74739784	74739784	0.000363597	174393798087104
327127	TFDP2	SLC3A2	-7439483	7439483	0.000194742	177105397014243
55548	CREB3L2	CHGB	-74108385	74108385	101959	899157624709325
13660	IRF3	ANXA2	73874466	73874466	0.797398	140983246920159
139717	RORA	GPX3	-7370095	7370095	2699.18	105687686883824
377244	NR2C2	TTR	7340738	7340738	150.991	118210479586358
55624	KLF3	CHGB	-7310344	7310344	0.397016	134011919503632
55450	ELF3	CHGA	-72792314	72792314	320.6	104940363033573
306042	SMAD9	SCG2	7231369	7231369	75.221	111236608090664
139710	KLF10	GPX3	7221798	7221798	173.979	117595041446968
65553	ZNF467	CPE	-72160736	72160736	0.000728074	161378241859712
306816	GATA4	SCGN	71892045	71892045	0.000641805	161925967685928
70021	FOXO1	CRYBA2	71819045	71819045	180.396	117437725358901
327055	TFDP1	SLC3A2	717228	717228	0.0027024	165682501001421
13727	KLF10	ANXA2	-7169627	7169627	1592.48	107979249884706
139598	TFDP1	GPX3	7167687	7167687	11.224	129498505645534
103905	MEIS2	ESM1	7115169	7115169	2.91154e-07	205358779186666
55374	BBX	CHGA	7048152	7048152	61.8657	122085498074506
377324	FOXA3	TTR	693098	693098	1.90709e+07	671962949935427
55690	MEIS2	CHGB	-6889994	6889994	1.14635e+06	794068366401635
13620	HNF4A	ANXA2	-6883828	6883828	0.00403681	153939619696453
306048	SIX6	SCG2	-6879741	6879741	5.33295	132730327381852
137857	NFE2	GPR137B	6862984	6862984	3.64467	134383414257792
13717	NR4A2	ANXA2	-6852544	6852544	192.893	107146845702071
206924	PLAGL1	MDK	-682715	682715	40.7403	123899763073657
306153	FOXP1	SCG2	-6818136	6818136	0.0555431	152553696485948
261770	CDC5L	PDX1	6800078	6800078	4.05317	133922053244578
13726	FOXA1	ANXA2	-6795956	6795956	1500.09	108238822342029
9474	THRB	ALDOB	-67786425	67786425	118.336	119268823085226
65534	EGR3	CPE	-6738002	6738002	0.421455	143752488778691
228730	TCF4	NFE2	6720309	6720309	0.00339857	164687037091719
55585	CDX2	CHGB	6714733	6714733	26.9223	125698875508128
117333	KLF6	FOS	6694755	6694755	773.008	111118162763842
346133	NEUROG3	ST3GAL6	-66642225	66642225	83.9918	120757631322463
152727	PAX6	HIGD1A	6652409	6652409	0.0167827	157751382689278
309698	ZBTB7A	SELENOM	-6652096	6652096	0.00262865	165802669895666
13633	DMRT1	ANXA2	6647811	6647811	0.0179304	15746410698082
55331	ZBTB37	CHGA	-65942176	65942176	947.189	110235634887163
20190	ATF1	ASB9	6572664	6572664	0.00315953	165003777841658
306784	ZSCAN30	SCGN	657193	657193	2.8701	135421037273973
55403	KLF13	CHGA	6514793	6514793	0.105924	149750048867963
259722	TFDP2	PCSK2	6483969	6483969	0.00201117	166965505752444
306835	KLF12	SCGN	-6478252	6478252	596.906	102240939733572
65436	TGIF1	CPB2	6441499	6441499	0.195121	147096950956508
258774	PAX1	PCNA	6417962	6417962	0.0733017	151348861192729
329454	NR4A2	SLC7A8	-6411266	6411266	6.59713	131806449393891
126011	NKX6-1	G6PC2	6393296	6393296	0.125338	149019155531148
13539	KLF11	ANXA2	-6379286	6379286	0.790075	141023314516248
377310	ATF3	TTR	-63411355	63411355	9.28822e+07	603206732366845
96010	FOSB	EGR1	6341076	6341076	0.0131113	158823554333471
259653	FOXO1	PCSK2	6323832	6323832	44.0486	123560677666753
174297	NR4A2	ISL1	6318726	6318726	0.0591887	152277613991557
57775	ETV1	CITED1	-6314538	6314538	0.594803	132256270599701
377966	NFYC	TXNIP	62988274	62988274	0.0218988	146595806609072
290922	THRB	RBP2	6295501	6295501	0.119743	149217494853724
259787	NR3C1	PCSK2	6279892	6279892	1.31476e-05	188811541376235
9486	BBX	ALDOB	6279759	6279759	1701.91	107690632434468
55336	SMAD3	CHGA	-6265847	6265847	29.4336	125311559939465
69992	ASCL2	CRYBA2	6258178	6258178	2.09074	136797004690477
380873	UBP1	UPK3A	62433645	62433645	0.0856523	150672607591681
390718	RORA	ZBTB20	6233812	6233812	0.00137274	168624107958105
227342	PAX4	NEUROG3	6231243	6231243	6.55285	131835695830862
377237	NEUROD2	TTR	-62310535	62310535	0.662396	111788819742227
96038	JUNB	EGR1	6228161	6228161	57.6264	122393787279281
55837	RORA	CHIA	62263906	62263906	0.0350475	144553430962323
324833	PDX1	SLC30A8	6201658	6201658	1.52987e-05	188153461214859
261800	NR4A2	PDX1	61993368	61993368	97.0156	120131586193182
139623	STAT1	GPX3	6183712	6183712	455.044	113419466115051
259783	PAX4	PCSK2	-6168419	6168419	21.5842	126658646696527
262153	TFDP1	PEG10	61579123	61579123	0.335962	144737098839828
369528	SIX6	TM4SF4	61322644	61322644	0.000143287	178437924898247
377984	KLF15	TXNIP	-60953863	60953863	0.00663475	151781757051051
369844	CREB3	TMED3	60947098	60947098	0.00126486	168979558655418
306765	KLF4	SCGN	-6088434	6088434	567.873	112457491240834
306103	MEIS1	SCG2	-60882933	60882933	2.01638	136954272939678
306828	SP1	SCGN	60765885	60765885	27961.8	95534353781866
55642	ETV5	CHGB	60274344	60274344	1.35303e+06	786869149053339
112548	LMX1A	FEV	60249243	60249243	95079.5	902191324598156
20207	FOXK1	ASB9	60051076	60051076	0.674381	121710944773225
55379	NRF1	CHGA	-59967536	59967536	171.568	11765563220779
377315	ZNF200	TTR	-59921402	59921402	13808.6	985984935497741
380882	TP53	UPK3A	-59858035	59858035	34.2352	124655271761345
258803	NFE2L3	PCNA	59584863	59584863	0.046601	153316043591962
178316	TFDP2	KCND2	5957414	5957414	0.13965	138549596239545
306855	NFATC4	SCGN	59567697	59567697	0.0407156	153902393802515
3090	ELF1	ACVR1C	-59430066	59430066	0.0014756	168310320725524
137791	NFE2L2	GPR137B	59427295	59427295	0.467564	143301592102877
380928	ZKSCAN1	UPK3A	-5939012	5939012	4.25042	133715677598057
55443	ZNF385D	CHGA	-59380144	59380144	538100	826913675507146
324775	BBX	SLC30A8	59250895	59250895	7.03028e-05	171530273381781
9608	ELF1	ALDOB	-58954623	58954623	0.37655	144241770027186
55692	JUNB	CHGB	5884999	5884999	433.976	113625343101419
346150	RORA	ST3GAL6	58815036	58815036	0.00502217	162991084588067
306785	ZNF704	SCGN	58702085	58702085	0.296338	135282122869686
9545	DBP	ALDOB	-58679532	58679532	1.41055	138506112502806
13576	ZBTB7A	ANXA2	5866206	5866206	45012.2	934666931761455
258439	E2F1	PCLAF	58490753	58490753	0.00968694	160138134245955
217135	ELF1	MT3	58177054	58177054	11.6142	129350117139375
55643	NFIA	CHGB	5806703	5806703	3.7078e+06	743088411387673
276309	CDX2	PPP1R1A	-57914633	57914633	0.329077	14482702821151
103906	ETV1	ESM1	-57874534	57874534	0.00015842	178001887491251
380937	NR4A2	UPK3A	57870682	57870682	1.02659	129886044717873
306788	NR2F6	SCGN	-5774078	5774078	8778.25	10056591821788
306796	E2F4	SCGN	5749602	5749602	30.7597	115120183565916
55394	HNF4A	CHGA	572391	572391	10.3521	129849723340948
198652	ETV1	LSAMP	-5700264	5700264	15.7619	128023925192243
377297	ZNF169	TTR	-56984834	56984834	3.22186e+06	749189321339864
65604	KDM2B	CPE	-56787517	56787517	0.00558765	152527709736895
100248	ZFP42	ELP4	-5658057	5658057	0.00126439	168981195850905
13744	ETV1	ANXA2	-5657005	5657005	94.6087	120240687359974
369525	SOX5	TM4SF4	56477975	56477975	0.000380228	174199557561096
139649	RFX2	GPX3	56448862	56448862	1068.39	109712708471071
13698	FOXP1	ANXA2	-56448147	56448147	310.483	105079626165663
2997	SMAD9	ACVR1C	5620012	5620012	0.000102704	179884118060064
103178	ETV1	ERO1B	-56152992	56152992	0.000353529	17451575354668
13621	NFATC3	ANXA2	-56124244	56124244	362.295	114409373227484
152675	TFDP1	HIGD1A	5611242	5611242	41.8766	123780290790642
55550	FOS	CHGB	55976346	55976346	490731	830915624207809
20270	PKNOX2	ASB9	-55863377	55863377	2.8478	135454911098641
2987	ASCL2	ACVR1C	5575814	5575814	13.6199	128658273865381
9437	SIX6	ALDOB	-5570262	5570262	4.831	123159630293631
309740	CREB3	SELENOM	55681616	55681616	17.5281	127562649849583
143408	SMAD9	GSTM3	5562476	5562476	6.05062e-07	202182004558972
377330	SIX4	TTR	-55417415	55417415	2.84168e+06	654642457206004
377309	ESRRB	TTR	-5531804	5531804	552622	825757148112923
55687	KLF6	CHGB	-55305064	55305064	2.25351e+06	764714109427039
103191	NR4A2	ERO1B	5527786	5527786	0.00751049	151243314512985
210519	PLAGL1	MFAP4	55273347	55273347	69.0887	121605930425111
139647	ZNF467	GPX3	-55029865	55029865	6.9182	131600068372385
327147	NR4A2	SLC3A2	-54865923	54865923	0.0132564	158775750745602
65108	PLAGL1	COX4I2	-54754976	54754976	0.00195786	167082174194288
329465	RORA	SLC7A8	54683357	54683357	19.9302	127004892787111
306799	FOXK1	SCGN	-5467564	5467564	28650.6	954286653682763
55498	HMX3	CHGB	-54654025	54654025	1.41167e+07	685026568829363
20282	NR4A2	ASB9	54635193	54635193	1888.39	107239093629702
262243	LIN28B	PEG10	5456275	5456275	2.09804	136781871522161
20230	MAF	ASB9	-54514628	54514628	25.1264	125998693370565
13536	SMAD3	ANXA2	-5442916	5442916	1.21237e+06	791636613256482
333003	EGR1	SMU1	5442231	5442231	3.37783e-05	184713619609697
117241	ELF2	FOS	5440238	5440238	2.04041e+06	769028348903587
9531	TEF	ALDOB	-54390512	54390512	20.7455	126830752011941
198565	BBX	LSAMP	54346886	54346886	4.03862	133937675219446
208991	ZNF467	MEIS2	54271877	54271877	0.000912565	170397361019118
227332	FOXN3	NEUROG3	5408832	5408832	12.7877	128932088165583
137780	TFDP1	GPR137B	5408171	5408171	6.10399	132143859490124
9524	TCF12	ALDOB	54078896	54078896	1041.59	109823012698442
55519	XBP1	CHGB	-53906266	53906266	125283	890210953273339
100384	FOXO1	EMB	53817663	53817663	0.0232712	156331802963855
13678	HSF1	ANXA2	5381127	5381127	433.696	113628149747672
55349	JDP2	CHGA	-53720832	53720832	3.41675	134663864367857
152713	FEV	HIGD1A	-5367082	5367082	0.560547	142513876607297
282233	TFDP2	PTGER3	-53643327	53643327	1.75978e-05	187545416947262
13593	FOS	ANXA2	-5347003	5347003	21.7626	126622887779258
57743	HEY1	CITED1	5334841	5334841	7.76904	131096328427648
126019	ATF1	G6PC2	53315997	53315997	2.01764e-05	186951556922891
309696	E2F4	SELENOM	53310443	53310443	0.0258532	155874861522101
143405	ZNF75D	GSTM3	53307015	53307015	0.00105481	169768259441349
88839	EGR1	DUSP1	53077746	53077746	100772	899665914583153
380944	PRDM5	UPK3A	5304604	5304604	51.4901	122882764334131
377279	TGIF1	TTR	52893754	52893754	4.41159e+07	635540470995243
152843	ETV1	HIGD1A	-52798685	52798685	0.119637	149221354832122
65621	ETV1	CPE	-52798554	52798554	115.701	119366646005529
55658	FOSL2	CHGB	-527324	527324	111.31	119534650497591
74757	KLF15	DACH1	5266261	5266261	6.6513e-05	181770932207271
189825	FEV	KRT7	52489277	52489277	0.0759109	151196959892658
55595	NFIC	CHGB	52482303	52482303	10.4114	129824908927884
379712	MAX	UCHL1	5234063	5234063	0.000257354	175894698019305
55622	ARX	CHGB	-5215005	5215005	69.5869	121574726040683
57748	RORC	CITED1	-5207446	5207446	0.000431781	173647369006757
377332	RORA	TTR	5206778	5206778	1.4492e+09	483887025608296
370426	PLAGL1	TMEM176A	51911	51911	164.696	117833173374982
37234	MEIS2	CACNA2D1	-51895235	51895235	0.656959	141824617491717
306834	RARA	SCGN	-51895034	51895034	6.08556	132156996683112
276232	KLF11	PPP1R1A	5186397	5186397	0.702686	141532386454196
55515	DNMT1	CHGB	-5185977	5185977	56.615	122470687898038
378045	NR3C2	TXNIP	-51689632	51689632	2.69015	135702233830085
306107	CDX2	SCG2	-51513076	51513076	1.28328	138916789793321
139627	NR1H4	GPX3	51490102	51490102	89.8579	120464437462615
380875	ZFY	UPK3A	-5147368	5147368	149.032	118267193517493
89674	E2F1	DUT	5139302	5139302	8.56985e-09	220670269783652
258764	MAZ	PCNA	5137696	5137696	0.00280428	165521784976589
261824	MEIS2	PDX1	5128532	5128532	0.0102677	159885286314706
377975	ARID3B	TXNIP	51243115	51243115	0.00325118	164879588556513
137824	PAX6	GPR137B	51161002	51161002	0.0872805	150590828554148
57664	TFDP1	CITED1	51133227	51133227	90.0715	120454124850559
167065	CEBPA	IGFBP2	5112679	5112679	0.0860775	140651103508899
13528	ZBTB37	ANXA2	51121376	51121376	170.687	117677988180488
103795	ARNTL	ESM1	51088408	51088408	2.12925e-05	186717726823315
9433	BHLHE41	ALDOB	51047757	51047757	7.53984	131226377809703
55436	ETV1	CHGA	-5103637	5103637	10855.4	996435557833611
282254	ZNF385D	PTGER3	51015805	51015805	0.1066	149722429573239
139690	ELF1	GPX3	-50979584	50979584	0.00523862	152807830705364
167025	ETV2	IGFBP2	-50826754	50826754	0.0424887	153717261318433
55667	FOSB	CHGB	5079518	5079518	21942.7	965871026194846
20299	JUNB	ASB9	50766278	50766278	18.4666	11733613157839
100343	NR3C1	ELP4	50710063	50710063	1.42568	138459773445823
100204	NKX6-1	ELP4	5063149	5063149	1.17535	129298316886919
306430	TFDP1	SCG5	50504047	50504047	38553	941394175881699
20296	PAX4	ASB9	-50502554	50502554	9.8592e+06	700615847025209
378001	ETS1	TXNIP	50333362	50333362	0.264007	135783837419284
57741	HSF1	CITED1	50213285	50213285	0.0047996	163187952263894
309750	KLF7	SELENOM	50193463	50193463	1.21887	139140412208534
20288	CREB5	ASB9	-5007831	5007831	3.08033e+07	651140274767197
235747	PLAGL1	NME2	5007109	5007109	0.0664308	151776306844246
282758	THRB	PTN	5004052	5004052	4.25461	133711405844599
137918	ETV1	GPR137B	-499495	499495	169.756	117701747922128
253205	CUX1	PAPPA2	49918737	49918737	0.636188	141964143419873
276346	ELF1	PPP1R1A	-49879584	49879584	0.0459967	153372729297132
198620	RORC	LSAMP	-49847577	49847577	0.129229	148886389901855
306035	POU3F1	SCG2	-4984291	4984291	72.9835	121367755306736
377305	CREM	TTR	498001	498001	9102.22	1004085277761
79566	PKNOX2	DIRAS3	49786326	49786326	272665	856437048554308
306875	CIC	SCGN	-4978362	4978362	3.9383	134046909699158
306767	NFATC2	SCGN	-49582064	49582064	3.10668e+06	750770326302604
306845	CXXC1	SCGN	49577318	49577318	1371.21	108628972369083
65397	NR6A1	CPB2	-4944555	4944555	1.08906	139629495647255
65420	RFX6	CPB2	-49403448	49403448	23.0773	126368146070683
377275	RFX2	TTR	4932497	4932497	1.31822e+08	588001171114302
306565	CREB3	SCG5	4927077	4927077	1077.54	109675648090029
306853	HSF1	SCGN	4915666	4915666	546.926	102620713184746
380934	RARG	UPK3A	49129557	49129557	6.58931	131811598482909
55504	CDX1	CHGB	4912003	4912003	8.13196e+08	508980485628891
377923	NR2C2	TXNIP	-49111906	49111906	0.770326	141133253407462
20209	SMAD5	ASB9	49104996	49104996	48.9864	123099243956438
208918	KLF11	MEIS2	-4894612	4894612	0.00229292	16639611952202
55442	FOXP1	CHGA	-48829444	48829444	2780.06	105559455128568
103182	ZNF385D	ERO1B	48710052	48710052	19039.1	972035283337645
380931	NR2C1	UPK3A	487014	487014	0.050201	152992872216353
309732	E2F5	SELENOM	48623517	48623517	47618.9	932222104616726
70035	ZNF467	CRYBA2	4861197	4861197	353.887	104511355358649
20206	EGR3	ASB9	-48514023	48514023	42726.6	936930200709038
379621	KLF13	UCHL1	48492514	48492514	14.1538	128491259875851
306072	FOXO1	SCG2	48478357	48478357	54541.2	92632752727326
117268	ETV3	FOS	4843761	4843761	66023.1	918030408629503
167030	ZNF467	IGFBP2	48349008	48349008	0.475371	133229673381814
346091	PAX6	ST3GAL6	48322212	48322212	0.00329257	164824655452087
25050	STAT1	B2M	4827093	4827093	0.00540395	16267288880098
327085	EGR1	SLC3A2	482706	482706	70.1461	121539963269269
79525	MAZ	DIRAS3	4817905	4817905	42.3663	123729789662152
306779	SMAD9	SCGN	4801171	4801171	362.517	114406710621356
57693	E2F4	CITED1	47992676	47992676	0.019156	147176957609126
139621	NR2F6	GPX3	-4795809	4795809	1.21641	139149184881903
327083	NR1H4	SLC3A2	47924023	47924023	45.9936	11337302482238
378205	E2F1	TYMS	4774506	4774506	1.52717e-05	188161120690591
126087	LMX1A	G6PC2	-47600616	47600616	158.535	117998754297989
125997	POU2F1	G6PC2	47569674	47569674	2025.3	106935105558815
324739	SOX5	SLC30A8	-47539353	47539353	0.000683727	171651175671688
65517	TCF7L2	CPE	-47503725	47503725	0.00332189	164786143444574
327077	ATF1	SLC3A2	47468577	47468577	1172.7	109308139925955
137896	ZNF385D	GPR137B	47464296	47464296	941.241	110262991345804
65581	ZNF250	CPE	4745029	4745029	3.00649	125219406380405
9539	CDX2	ALDOB	-47440812	47440812	343582	846396909934467
262258	ZNF385D	PEG10	-47389586	47389586	24.6524	126081405126637
20171	SMAD4	ASB9	47286782	47286782	4.62764	133346406279128
20268	EGR2	ASB9	-47279134	47279134	3.56887e+06	744746987791694
13631	ZNF281	ANXA2	-47252133	47252133	71.9905	121427248599805
346171	FOXN3	ST3GAL6	-471484	471484	745.751	111274060120049
55679	PPARA	CHGB	-47124248	47124248	2.16075e+06	766539488033034
369615	NR3C1	TM4SF4	-4701628	4701628	0.169741	147702140957427
47470	GLI2	CDA	47002107	47002107	0.205605	146869655335224
306057	XBP1	SCG2	46853486	46853486	664.308	111776304490068
370714	ASCL2	TMEM52	46824854	46824854	0.00050141	172998073549746
291196	TFDP2	RBP7	4669981	4669981	0.0553668	152567506567531
13733	MEIS3	ANXA2	-4665288	4665288	73.0438	121364165970486
167113	RORA	IGFBP2	-46597138	46597138	280.463	115521248929469
25140	STAT3	B2M	-46592098	46592098	3.57846e-05	184463043880844
137839	KLF15	GPR137B	-46586234	46586234	0.0943065	150254584169664
282775	ZNF467	PTN	46574626	46574626	0.0295938	155287999499581
164420	EGR1	HSPH1	46528835	46528835	0.0227618	156427929992059
369837	TFDP2	TMED3	46381388	46381388	9.93534	130028173992365
70023	ZNF304	CRYBA2	4632675	4632675	18800.6	9725827273618
109667	PLAGL1	FAM162B	-4630661	4630661	0.178023	147495233676475
268791	MEIS2	PLAGL1	-4629469	4629469	0.117672	149293280892269
276345	RORC	PPP1R1A	-46293724	46293724	75.0466	121246692509283
152730	THRB	HIGD1A	46290692	46290692	22.4043	126496678961732
253220	IRF7	PAPPA2	46212472	46212472	63.735	121956221342719
100194	ASCL2	ELP4	46114173	46114173	1055.27	109766343597116
309670	KLF4	SELENOM	-46005305	46005305	9875.42	100054442914441
25101	TGIF1	B2M	45962382	45962382	4.06761e-06	193906611354023
103750	CREB3L2	ESM1	45841128	45841128	1.53203e-05	188147340494543
198554	PAX6	LSAMP	45825023	45825023	1559.33	108070616402279
47570	ETV1	CDA	4576163	4576163	0.000235447	176281066345982
198612	NR3C1	LSAMP	45685876	45685876	1.91778	127172020959758
306814	RFX2	SCGN	45609664	45609664	207.529	116829222465243
137852	USF1	GPR137B	45604795	45604795	0.0814647	150890302846051
13701	GATA6	ANXA2	-45598615	45598615	0.747497	141263907514252
319094	IRF7	SKAP1	4559097	4559097	0.00534427	162721116526219
65555	MAZ	CPE	45517374	45517374	0.406394	143910521974359
79503	THRB	DIRAS3	-4538227	4538227	0.702626	141532759939753
306869	GATA6	SCGN	-45348637	45348637	0.955127	140199388163914
143544	CREB3	GSTM3	45331124	45331124	13.8325	128590995090975
377298	RXRB	TTR	45273013	45273013	67742.5	916913888577716
13637	SP3	ANXA2	45261715	45261715	1153.21	109380919550843
208917	SMAD9	MEIS2	-4516974	4516974	0.000111253	179536879235545
55646	CREB3L4	CHGB	45150567	45150567	51015.7	929229629620527
262214	TCF4	PEG10	4514723	4514723	802877	809535084084644
79564	EGR2	DIRAS3	45091327	45091327	596.607	112243114077896
268676	BBX	PLAGL1	4508473	4508473	0.0072412	161401891935221
55348	NR2F6	CHGA	-45042105	45042105	5.98356e+06	722304014764182
70072	FOXP1	CRYBA2	45039084	45039084	12509.8	990275071833576
262204	GATA4	PEG10	44948053	44948053	56.5035	12247924510975
306142	ARX	SCG2	-44934906	44934906	10342.3	998538138388313
380895	CDX2	UPK3A	-44856533	44856533	4181.04	103787152533574
259058	IRF7	PCSK1	4476858	4476858	6.45425e-05	171901541786938
306082	CREB3L2	SCG2	44721182	44721182	0.636521	131961872583148
100344	ETV1	ELP4	-4470468	4470468	0.000174866	177572943935835
103904	NR3C1	ESM1	44675626	44675626	0.348359	144579730633988
167092	NR4A2	IGFBP2	44657834	44657834	251.223	115999406905208
65460	ELF4	CPB2	4460948	4460948	0.000318382	174970510108515
178259	ELF2	KCND2	-44495054	44495054	17.8672	12747942552366
306885	ZEB1	SCGN	44472933	44472933	4.19067e+07	637771619861592
55345	ZNF704	CHGA	-4445774	4445774	198.77	117016482294446
132578	IRF7	GHSR	44410918	44410918	23.6185	126267469400557
378043	NFYB	TXNIP	44378135	44378135	19.2438	12715708587774
261674	NR1H4	PDX1	-4432187	4432187	0.073332	151347063050653
217154	MAX	MT3	44275813	44275813	0.312909	145045824227195
324720	ASCL2	SLC30A8	4425497	4425497	0.36667	144357247558122
14551	ASCL2	APOBEC2	44195198	44195198	1.8656e-05	187291810648677
276256	E2F4	PPP1R1A	4416058	4416058	17.8194	12749105896538
126982	ASCL2	GADD45G	4404377	4404377	1.28603e-06	198907497044866
377287	TFEB	TTR	-44032723	44032723	182718078343195	373821848091091
377331	PKNOX1	TTR	44029444	44029444	484642	831457890276723
9430	SOX5	ALDOB	-4399472	4399472	1986.34	107019472280359
377836	TFDP2	TUSC3	43970585	43970585	619.212	112081608216638
55677	CREB5	CHGB	4391716	4391716	395.246	104031330631069
79558	HSF1	DIRAS3	43863595	43863595	2031.2	106922477025259
55508	NR4A3	CHGB	43726772	43726772	1.04203e+07	698212185739224
306604	NR4A2	SCG5	43719567	43719567	230.1	11638083485627
380878	RFX6	UPK3A	-43650337	43650337	0.77325	141116798100162
13664	PLAG1	ANXA2	43633446	43633446	40602	939145225889277
57675	SMAD9	CITED1	43632276	43632276	0.307446	145122310533657
309712	ETV2	SELENOM	-43595966	43595966	859.931	110655364539796
369831	HEYL	TMED3	43591596	43591596	29.5313	125297171848642
198619	EGR2	LSAMP	-435788	435788	566.381	112468915516325
72661	RORC	CXCL12	43559972	43559972	0.00161896	16790764604623
253154	GATA4	PAPPA2	4353148	4353148	567.058	112463728021023
309710	BBX	SELENOM	-43505747	43505747	13267.2	987722192053187
259752	GATA6	PCSK2	-4346621	4346621	96.3776	120160239781134
380898	MNX1	UPK3A	-43358374	43358374	95.9957	110177484253168
47460	NR1H4	CDA	4328917	4328917	1101.76	109579141630077
329392	BBX	SLC7A8	4323903	4323903	0.00163805	167856733026543
13577	EGR3	ANXA2	-43169755	43169755	40485	939270615280999
13740	MZF1	ANXA2	4310887	4310887	281.592	115503801025578
259656	THRB	PCSK2	43085456	43085456	53.6021	122708179702521
373028	MTF2	TOX	4307507	4307507	0.0244247	14612170213458
65551	MBD2	CPE	4306907	4306907	0.275364	145600925506138
9513	HOXB2	ALDOB	4302798	4302798	0.0638417	14194895456616
145465	NR4A2	GULP1	430098	430098	0.00110875	169551673594176
32542	STAT1	BTBD17	42985413	42985413	0.000297913	175259100683107
152768	MNX1	HIGD1A	4290977	4290977	137.556	118615201959858
20228	HNF4A	ASB9	-42880878	42880878	4.75119	133231977609491
309739	KLF3	SELENOM	42861037	42861037	5.61685e+07	625050717117975
37183	TFDP2	CACNA2D1	42822003	42822003	0.0033534	164745142090297
103739	FOXO1	ESM1	4280581	4280581	22.2333	126529952087172
259699	CDX2	PCSK2	-4280297	4280297	15.3209	128147159365037
209077	ELF1	MEIS2	42727005	42727005	2.04372e-06	196895777652854
259511	TFDP2	PCSK1N	-42707384	42707384	60.9979	122146852710961
306774	ZNF768	SCGN	-42673707	42673707	27301.4	956381480182271
154747	E2F1	HMGB2	4263751	4263751	0.000811799	170905513905183
100298	NR3C2	ELP4	-42635024	42635024	0.047689	153215821411867
192557	HOXB2	LGALS2	42603247	42603247	7.78364e-06	191088172138105
309673	NFATC2	SELENOM	-42571165	42571165	3370.97	104722455616945
259369	BHLHE41	PCSK1N	42560246	42560246	0.000999664	160001460657249
25014	TFDP1	B2M	42546384	42546384	4.69011	133288165827014
13532	ZNF383	ANXA2	42537555	42537555	33.5108	124748149074449
225528	RORA	NEGR1	425186	425186	3.59623e-06	194441529557795
351517	BBX	SYT4	42490885	42490885	1.78793e-05	187476491248177
65596	ELF1	CPE	-4246854	4246854	177.583	117505979701461
309700	PAX6	SELENOM	42464603	42464603	73036	913646308827786
377929	SMAD9	TXNIP	42430658	42430658	2312.18	106359790853065
261685	PAX6	PDX1	42331062	42331062	20.5826	126865002660188
309687	ZBTB7B	SELENOM	42324714	42324714	40.8694	123886020970188
378008	CDX2	TXNIP	4215947	4215947	122083	891334612427505
306824	THAP1	SCGN	42025235	42025235	132.898	118764808198845
377333	SCRT1	TTR	-42016946	42016946	407368	839001351716916
268785	ZEB1	PLAGL1	4200394	4200394	0.592962	14226973223033
217060	RFX6	MT3	4197784	4197784	397918	840020595319747
65592	EGR2	CPE	-4196874	4196874	18756.2	872685535788489
126009	POU3F1	G6PC2	-41882217	41882217	0.717233	141443397150746
377267	TFE3	TTR	41831847	41831847	177.45	117509247307079
207079	RORA	MDK	-41804843	41804843	1841.37	107348583705926
55564	MAZ	CHGB	-41795287	41795287	30279.2	951885616170111
309753	NFKB1	SELENOM	-4176913	4176913	8183.88	100870409337114
25082	ETV2	B2M	41757263	41757263	2.46427e-05	186083122645642
55459	CLOCK	CHGA	-41741613	41741613	602916	821974350147388
143415	BHLHE41	GSTM3	41573953	41573953	0.025291	15597034213893
100277	NFIC	ELP4	41515432	41515432	2.04542e-05	176892183237269
306768	MYBL2	SCGN	-41499343	41499343	4.53858e+07	634308008060828
259212	PDX1	PCSK1	4149231	4149231	5.2223e-06	192821377860555
139656	HNF4A	GPX3	4149204	4149204	5.26085	132789442180428
377320	NR4A2	TTR	4145012	4145012	3.51723e+08	545379885620589
117295	EGR2	FOS	4140556	4140556	2.36641e+08	562590944680467
377277	HNF4A	TTR	4138142	4138142	510031291399566	329240317828387
180425	NR4A2	KCNK16	41373942	41373942	1.3845	138587067442016
74808	KLF7	DACH1	41354463	41354463	6.65984e-06	191765360367417
55605	RELA	CHGB	41264627	41264627	284025	854664324812645
380858	NR2F6	UPK3A	-41250695	41250695	1.84843	13733198105007
37220	KLF10	CACNA2D1	41239563	41239563	112.103	119503813358612
139614	KLF11	GPX3	41203476	41203476	91.0141	120408911247471
276260	EGR3	PPP1R1A	-41179217	41179217	37682.2	942386386116393
55799	NEUROG1	CHIA	-4116051	4116051	1.34538	138711553569444
77207	LMX1A	DDC	41146815	41146815	83913.2	907616967036358
309769	KLF6	SELENOM	4108463	4108463	54960.6	925994853293872
55608	NFYA	CHGB	4107289	4107289	1.95056	127098396400016
72046	ELF2	CTSZ	4104337	4104337	0.0105802	149755044997561
100338	ZEB1	ELP4	4092901	4092901	332.81	114778042092429
327068	SMAD9	SLC3A2	40900007	40900007	2.14602	136683667441633
13579	ZNF543	ANXA2	4089854	4089854	2.95842	135289400385199
9509	GATA4	ALDOB	40838145	40838145	0.658594	141813822586201
369605	FOXN3	TM4SF4	4082551	4082551	0.096507	150154411048524
103885	FOXN3	ESM1	-4082116	4082116	0.394498	144039556119251
261765	ARX	PDX1	-40709957	40709957	0.00261945	165817890638333
378012	MNX1	TXNIP	-4069788	4069788	7.69847	121135957683558
47476	ELF2	CDA	4067979	4067979	0.0840346	140755416092839
152778	NKX1-1	HIGD1A	40655572	40655572	0.00751534	161240515486866
155390	IRF3	HMGN3	40630303	40630303	0.000349655	174563602816888
306609	BCL11B	SCG5	-4062446	4062446	18.203	12739856254584
306506	ZNF467	SCG5	-40621497	40621497	0.0447085	15349609581742
192558	HNF4A	LGALS2	4058606	4058606	0.0283101	155480578726864
88973	JUNB	DUSP1	4056114	4056114	586.162	112319820911823
309676	ZNF662	SELENOM	40488917	40488917	13733.1	986223232272301
55363	EGR3	CHGA	-4046618	4046618	8.50482	120703351003656
55587	RARA	CHGB	4046431	4046431	7.98113e+07	60979353829841
259654	PAX6	PCSK2	4035316	4035316	0.322706	134911928589315
143377	TFDP1	GSTM3	40351044	40351044	0.103771	149839236371778
79475	SMAD9	DIRAS3	40347073	40347073	80.7758	120927184810073
377963	FOXK1	TXNIP	-40248044	40248044	38.7326	12411923768635
227206	EGR3	NEUROG3	4020182	4020182	6060.6	102174840930814
311822	THRB	SERPINF2	-40177505	40177505	0.00640014	151938102525225
327098	NRF1	SLC3A2	-4013455	4013455	84.2609	120743738152116
378075	ELF3	TXNIP	40128417	40128417	356.792	114475845542862
206983	ZNF467	MDK	4009922	4009922	10298.8	898721345088828
259733	NR3C2	PCSK2	-40091276	40091276	12.6831	128967753401525
217164	NR3C1	MT3	-40050555	40050555	106.495	11972670842357
143559	ELF1	GSTM3	-40002152	40002152	1.06573	139723511861053
154710	PHF1	HMGB2	39966296	39966296	192.789	117149174418399
57700	GLI2	CITED1	-39920554	39920554	0.0345793	154611841154625
88956	FOSB	DUSP1	39842688	39842688	302.354	115194848625816
117255	ETS1	FOS	-39821453	39821453	2739.85	105622733741651
55346	ATF1	CHGA	39790567	39790567	373.061	114282205934996
100473	NR4A2	EMB	3978554	3978554	152331	881721223428572
309679	ZNF596	SELENOM	39773062	39773062	96.2769	12016477981038
9648	IRF8	ALDOB	3974607	3974607	390.037	114088938693981
13565	XBP1	ANXA2	39743647	39743647	1.80318	137439606178224
377958	E2F4	TXNIP	39716385	39716385	194.073	117120356978908
152749	MECP2	HIGD1A	3967546	3967546	19.372	127128261801359
377953	EGR1	TXNIP	-3963322	3963322	150.352	118228901486097
262234	CXXC1	PEG10	39609488	39609488	416.351	113805401422798
252097	CREB3L2	P2RY14	39604392	39604392	0.0898685	15046392669937
55422	NR2F2	CHGA	-39571095	39571095	4404.76	103560782273372
276288	MAZ	PPP1R1A	39558657	39558657	156.527	118054115930384
145380	SMAD9	GULP1	3949807	3949807	0.00174136	167591120561137
261737	MNX1	PDX1	39462015	39462015	0.308034	145114012492572
174182	ASCL2	ISL1	-3945628	3945628	6.4681	131892231233258
276338	KLF3	PPP1R1A	3943512	3943512	6.90109e+07	616108237407601
235735	TFDP1	NME2	3942172	3942172	0.000124378	179052568738563
103102	GLI2	ERO1B	-39392155	39392155	29.8765	12524670904832
103207	ZEB1	ERO1B	-3938842	3938842	26.1907	125818523370347
282749	NR1H4	PTN	-3935218	3935218	197.259	117049628901759
225390	SIX6	NEGR1	-39326224	39326224	0.0158029	158012636867426
198546	RFX3	LSAMP	39308283	39308283	18112.1	97420314887679
369784	ELF2	TMED3	39277274	39277274	15840.5	880023216609363
329378	NR1H4	SLC7A8	39228544	39228544	0.714473	141460144298536
306818	ZNF783	SCGN	-39195746	39195746	3929.87	104056215008701
208942	NR1H4	MEIS2	-3918121	3918121	0.810351	14091326620497
177210	EGR3	JUNB	39162815	39162815	2.69346e+06	756968931391558
20182	SMAD3	ASB9	-39155744	39155744	985.706	100062527691503
151815	ETV1	HHEX	3914909	3914909	6.95893	131574578083298
74767	ETS1	DACH1	3912452	3912452	10.2306	129900972271933
306878	FOXN3	SCGN	-39058257	39058257	3.00262e+08	552249967732502
9593	NFYB	ALDOB	38994495	38994495	133.524	118744418918518
253198	CEBPA	PAPPA2	-389491	389491	23349.8	963171617022679
13610	GATA4	ANXA2	-3892832	3892832	6276.81	102022607464481
178217	SMAD9	KCND2	38909465	38909465	46.6442	123312020404298
55621	HSF1	CHGB	-38892765	38892765	14369.5	984255765202311
167144	NKX6-1	IGFBP5	38887978	38887978	0.0781169	141072551538387
126046	BBX	G6PC2	3886425	3886425	4.7642e+06	732200956115815
177268	EGR2	JUNB	38784623	38784623	1363.84	108652376809882
3050	TCF4	ACVR1C	38777467	38777467	2.25524	136468067374186
55335	REST	CHGA	-38774412	38774412	292423	753398877392424
253181	IRF2	PAPPA2	38770482	38770482	0.254182	145948556575495
126155	ETV1	G6PC2	-38767092	38767092	1454.08	108374104524649
55555	ETV2	CHGB	38755726	38755726	227765	864251275643958
329403	ETS1	SLC7A8	-3874291	3874291	0.0636824	151959808669946
126060	MAF	G6PC2	-38740005	38740005	704143	815233891436901
276357	KLF5	PPP1R1A	-3873793	3873793	7.9704	130985198505733
192525	THRB	LGALS2	-3871202	3871202	0.00442245	163543368679393
38011	ZNF385D	CADM2	3868985	3868985	1.81529	127410544481293
126112	CREM	G6PC2	-38642604	38642604	38382.8	941586316218706
55536	E2F4	CHGB	-38601935	38601935	9487.43	100228515643397
207030	TFDP2	MDK	38575407	38575407	3939.74	104045327880264
210631	TP73	MFAP4	3855559	3855559	4.30615e-06	183659104959926
377264	FOXS1	TTR	3855352	3855352	6.12823	122126649232779
13553	NR4A3	ANXA2	-38534522	38534522	13.5673	118675067765277
65522	ATF1	CPE	3848563	3848563	0.0271554	155661431302231
103104	RFX6	ERO1B	-3847606	3847606	0.930326	140313647785293
117244	ETV2	FOS	-38432885	38432885	7713.04	101127745117697
377322	NR2F1	TTR	-38419206	38419206	105246	897779392868705
380855	SIX6	UPK3A	-38417455	38417455	4331.08	103634041840832
258438	E2F7	PCLAF	3832026	3832026	105838	797535719029901
370502	ZNF250	TMEM176A	38297668	38297668	0.0255369	155928322504734
327060	NFATC2	SLC3A2	3826053	3826053	0.199618	146997994577438
137894	KLF7	GPR137B	38245913	38245913	6.56524e+06	71827496981575
100247	ETV2	ELP4	38232706	38232706	182.842	117379232537641
20237	MAFK	ASB9	-3821063	3821063	0.0313879	155032380703243
309766	NFKB2	SELENOM	3819301	3819301	1318.7	108798529880497
379497	TFDP1	UCHL1	3817062	3817062	1905.42	107200103124221
72647	HEYL	CXCL12	38167134	38167134	0.000619251	172081335701915
79573	ETV5	DIRAS3	38160108	38160108	12484.5	990362785023725
117393	EGR1	FOSB	38157437	38157437	0.477714	143208321862932
55689	E2F6	CHGB	38139462	38139462	89935	904607130885546
47459	FEV	CDA	-38124282	38124282	2.42447e+07	661538335771246
262217	CTCF	PEG10	38078904	38078904	130.578	118841293784214
55800	RORC	CHIA	3804429	3804429	5375.77	926955918747235
306851	NR2F2	SCGN	-38006786	38006786	400929	839693276473136
65507	TGIF2	CPE	-37974454	37974454	0.0322843	154910082051834
324824	IRF3	SLC30A8	3796785	3796785	25.9158	125864361974
174230	RFX6	ISL1	37929963	37929963	15662	980515252165957
285466	TFDP2	RAB26	37913956	37913956	24.3657	116132213460774
276262	PAX6	PPP1R1A	3791263	3791263	4.6256	133348318298201
143506	KLF13	GSTM3	37869338	37869338	0.115796	149363078396051
306544	TFEB	SCG5	-3786642	3786642	7103.47	101485292020865
329410	CDX2	SLC7A8	-37847087	37847087	0.107539	149684359546586
209017	ARNTL	MEIS2	3783092	3783092	0.0909408	150412414544454
167072	KLF3	IGFBP2	37797954	37797954	1189.17	10924757855482
20217	RFX6	ASB9	-37791695	37791695	699020	815551048348894
372941	THRB	TOX	37775174	37775174	0.0016919	167716259963942
95866	EGR3	EGR1	3774402	3774402	117.739	119290802514462
167079	RORC	IGFBP2	-37739012	37739012	75.8935	12119795308744
306563	NR3C1	SCG5	37687734	37687734	0.727662	121380702740179
369701	ZNF385D	TM4SF5	-37677392	37677392	0.438752	1435778067861
217044	RFX3	MT3	37676997	37676997	4.74901	133233965839091
13529	IRX3	ANXA2	-37676577	37676577	65.9164	111810063063914
306185	PAX4	SCG2	-37645463	37645463	1.88005e+07	6725831304476
137878	TFDP2	GPR137B	-37597522	37597522	5871.03	102312854897323
329370	NR2C2	SLC7A8	37594944	37594944	0.0201389	146959643118503
327095	E2F1	SLC3A2	-37593734	37593734	1245.57	109046327939563
13632	SP1	ANXA2	-37509777	37509777	11.0004	129585924046453
55408	SP4	CHGA	37499994	37499994	4685.41	103292524943284
306118	DLX2	SCG2	-37470188	37470188	139.076	118567492257006
55793	CEBPA	CHIA	-37445385	37445385	670174	817381232917162
152841	RORA	HIGD1A	37437078	37437078	70.1004	121542797909203
20249	E2F2	ASB9	-37322603	37322603	143.425	118433742568403
137909	KLF10	GPR137B	37315875	37315875	14.8926	128270285858423
259747	FOXP1	PCSK2	-37307315	37307315	0.00698201	161560192398796
282264	FOXN3	PTGER3	-3727872	3727872	28.7624	125411742548457
139628	E2F4	GPX3	37232656	37232656	14.3568	128429436025347
167027	ZNF260	IGFBP2	3722226	3722226	0.171114	137667141656007
390625	FOXP4	ZBTB20	3720065	3720065	3410.06	946723784327789
55753	FOXJ1	CHIA	3718005	3718005	3.80778	134193277402162
72024	NR1H4	CTSZ	37178084	37178084	249.639	116026867308232
137801	SMAD9	GPR137B	37165765	37165765	345.486	114615697492493
377296	NFE2L3	TTR	-3715035	3715035	500241597352881	330082019755217
296452	IRX1	RGS4	37144974	37144974	1.02941	139874099278044
137855	ZNF281	GPR137B	-37128985	37128985	251.629	11599240125933
369767	ZBTB7A	TMED3	-3712652	3712652	18.871	117242049109873
258405	MYBL2	PCLAF	37059765	37059765	7.05021e+07	615179777769398
55688	RORA	CHGB	-37058007	37058007	2.64302e+06	757790023175279
329054	RORA	SLC7A2	37020437	37020437	0.0318935	154962982265055
79601	KLF6	DIRAS3	36991283	36991283	21943.3	965869839168728
309755	ETV6	SELENOM	36979258	36979258	4242.36	103723923110449
306152	ATF3	SCG2	-3697851	3697851	7388.87	101314219016502
103204	PPARA	ERO1B	-36966607	36966607	172.4	117634638392805
290904	FEV	RBP2	-36964197	36964197	1.52035	138180575258913
327065	ZFP64	SLC3A2	36951166	36951166	0.00677927	15168817163821
65423	MYCN	CPB2	36950976	36950976	670.192	111738006566109
329377	NR2F6	SLC7A8	36936298	36936298	5.08753	132934927599
13802	FEV	ANXA4	369277	369277	0.109629	149600748766383
3017	ZBTB7A	ACVR1C	-36921218	36921218	0.016261	157888521575726
276253	EGR1	PPP1R1A	-36912937	36912937	10905.1	996237190923714
55479	E2F6	CHGA	36912348	36912348	9.95269	130020593841525
352129	MEIS2	TAC1	-36908258	36908258	0.00283406	165475913022387
331444	E2F1	SMC2	36859717	36859717	5.74437e-08	192407578671116
286516	EGR1	RABEPK	36856104	36856104	5.88286e-05	182304113646007
262272	KLF10	PEG10	36830638	36830638	1.03053e+06	798693882135272
100477	FOXN3	EMB	-36812026	36812026	1.32972	138762404475116
380904	RFX1	UPK3A	36781725	36781725	0.12065	139184733623374
13511	TFDP1	ANXA2	3676788	3676788	54811.3	926112951808202
369699	ELF1	TM4SF5	-36758073	36758073	0.0250482	156012230912237
208958	PAX6	MEIS2	3675642	3675642	0.00303379	165180146244153
207071	MTF2	MDK	36747545	36747545	0.0422499	153741744128868
57688	NR1H4	CITED1	-36743116	36743116	5758.15	102397170334696
329391	E2F1	SLC7A8	-3672969	3672969	89.8219	120466175245391
25198	RORA	B2M	36715686	36715686	35.0696	124550694850281
290930	CREB3L2	RBP2	36686882	36686882	5.31949	132741296748931
306805	E2F1	SCGN	-36645714	36645714	416644	838023480710143
135449	TFDP2	GLUD1	-36644395	36644395	0.114852	149398616563493
348798	PAX6	STMN3	3664328	3664328	0.187933	147259977675716
13694	KLF7	ANXA2	-36639363	36639363	953.404	110207229751322
145410	ZNF467	GULP1	-36635116	36635116	0.00678436	161684909613923
306499	KLF15	SCG5	-36629684	36629684	0.267345	135729271611183
103111	KLF15	ERO1B	-36624476	36624476	12040.8	991934524131262
65600	CREB3L4	CPE	-36623478	36623478	547.769	112614028862137
306170	FOXN3	SCG2	-3660955	3660955	730.304	101364961723684
262201	ZNF467	PEG10	-3658613	3658613	2.54784	135938275333601
324858	FOXP1	SLC30A8	-36583412	36583412	27.7343	125569832049506
227180	SOX5	NEUROG3	36578912	36578912	32.0866	124936764899634
13597	KLF15	ANXA2	-36571212	36571212	1157.08	109366349219707
3115	MEIS3	ACVR1C	36565088	36565088	8369.87	100772814278178
55616	CREB1	CHGB	36560692	36560692	174292	875872169766264
126094	FOXB1	G6PC2	36560185	36560185	97.2691	120120248839997
369759	NR1H4	TMED3	36534037	36534037	0.852133	130694924574935
262172	ZNF704	PEG10	3653251	3653251	0.0296052	155286322579208
380845	NR2C2	UPK3A	36526434	36526434	43144.5	93650744446171
167008	ZBTB7A	IGFBP2	-36450945	36450945	7.97639	13098193698448
253223	ETV5	PAPPA2	3642327	3642327	0.0763281	15117315767303
283521	FEV	PTPRN2	-36410693	36410693	0.003101	165084975625693
55656	ELF3	CHGB	36410082	36410082	2.38884e+06	762181262544796
346156	THRA	ST3GAL6	36387984	36387984	0.00709802	161488625750765
145455	ELF1	GULP1	-3629954	3629954	0.00110486	169566914492402
283652	ASCL2	PTPRT	3628559	3628559	0.0915133	150385157103452
309729	ATF6	SELENOM	36283407	36283407	3535.63	104515327466726
306859	RORA	SCGN	-36282286	36282286	6.06006e+06	621752297684823
37185	CREB1	CACNA2D1	3625179	3625179	0.379007	144213526801582
137810	ATF1	GPR137B	36187038	36187038	4.83357	113157319215922
299435	PAX4	ROBO2	-3615317	3615317	0.793432	141004904579983
377326	SNAI1	TTR	-36152728	36152728	5.7658e+07	623914065731532
9484	RFX6	ALDOB	-3613922	3613922	0.00458329	163388223962436
299444	RORA	ROBO2	36110837	36110837	8.83404e-06	180538408696179
55417	BATF3	CHGA	-36070295	36070295	412.126	113849702299715
65512	SMAD9	CPE	36066417	36066417	0.178292	14748868019268
2995	SMAD3	ACVR1C	36010206	36010206	0.00405954	163915226843873
198576	MAZ	LSAMP	35929557	35929557	9.99289	130003088019527
369573	LMX1A	TM4SF4	35916194	35916194	4421.96	103543850321778
192606	CREB3	LGALS2	35878554	35878554	0.360612	144429599112628
167084	ETV5	IGFBP2	-35874225	35874225	231.026	116363391956517
261767	HEY1	PDX1	3586685	3586685	0.786217	141044577347602
101735	FEV	ENPP2	-35861794	35861794	0.146598	148338711266116
13693	ELF1	ANXA2	35840105	35840105	3.58957	134449578997821
373018	NR4A2	TOX	35835717	35835717	1.97952	137034409725131
13689	ZNF566	ANXA2	35834424	35834424	12.7721	128937377285235
103167	CREB3	ERO1B	358209	358209	4.70523	133274188006159
152729	NFYC	HIGD1A	3581222	3581222	407.494	113898783885288
282847	POU6F2	PTN	-35795536	35795536	260513	858416981340013
57671	ZBTB37	CITED1	3579539	3579539	2.5255	135976517839703
214525	TFDP2	MPP3	35786375	35786375	2.74322e-05	185617398154937
377875	KLF5	TUSC3	-35751708	35751708	73.0719	121362497362535
225447	ZNF467	NEGR1	-35731323	35731323	0.00032685	17485651003772
57679	TCF7L2	CITED1	-357244	357244	0.000920768	170358496017865
246962	TFDP2	NWD2	357184	357184	9.8423e-07	190069032873687
306543	LMX1A	SCG5	-3566955	3566955	3178.66	104977558716743
192680	PLAGL1	LGI4	35643376	35643376	2.21821e-10	236539964866085
328927	MAFG	SLC7A2	35629645	35629645	0.357436	144468019113373
351595	FOXA3	SYT4	35625797	35625797	2.10481e-05	186767877513346
55380	ETV2	CHGA	35608556	35608556	854838	806811603370632
997	ZEB1	ABCC8	35590906	35590906	0.0467062	15330625456833
79476	KLF11	DIRAS3	3558575	3558575	42214.9	937453403195845
65611	MAX	CPE	35584234	35584234	503.468	112980282378193
55542	SMAD5	CHGB	35567913	35567913	27729.5	955705792497047
73439	MAFA	CXCR4	3551864	3551864	3.14431	135024751046905
112753	PAX4	FEV	3551534	3551534	0.381805	144181580947042
126126	ZNF18	G6PC2	35490386	35490386	0.0857845	150665911172389
55537	ZBTB7A	CHGB	-35457455	35457455	1.21691e+06	791474283788331
192567	FOXP2	LGALS2	-35432328	35432328	2.12995e-06	196716305644906
139692	ETV5	GPX3	3540675	3540675	383.682	114160285866515
13700	NR2C1	ANXA2	35349827	35349827	15447.1	981115343709652
429285	KLF7	ZNF609	35349745	35349745	0.00141686	168486744535061
209047	PLAG1	MEIS2	35345636	35345636	1.52332e+06	781721012046521
100324	ELF3	ELP4	-35329774	35329774	0.527227	142780023039366
309722	SP1	SELENOM	35314787	35314787	385.606	114138560984395
3084	RORC	ACVR1C	-35300486	35300486	169.567	1177065777556
285504	FOXN3	RAB26	35299536	35299536	6472.62	1018891965484
55804	MAFA	CHIA	35259843	35259843	581.485	112354614026582
217163	RORA	MT3	35230894	35230894	67185.7	917272329986398
377969	THRB	TXNIP	-35180666	35180666	128297	889178357627179
259628	ZBTB7B	PCSK2	-35157774	35157774	4.80525	133182840049887
259469	TCF4	PCSK1N	35122417	35122417	32054.1	949411608159516
13691	ESRRB	ANXA2	-3511849	3511849	4172.04	103796518374015
65398	NR2C2	CPB2	3506407	3506407	13.8603	12858228324984
132600	MEIS3	GHSR	35063483	35063483	19.0367	127204083756392
253139	ELF2	PAPPA2	-35055816	35055816	47016.6	932774888955208
9561	RFX1	ALDOB	3505407	3505407	38.1316	114187152591827
126084	TFEB	G6PC2	3504808	3504808	469.03	11328799765497
258767	SPI1	PCNA	350279	350279	1236.46	10907820392313
208960	SMAD5	MEIS2	35024907	35024907	12.5395	129017212301332
282755	PAX6	PTN	34996632	34996632	5.72739	132420429786647
39201	ETV1	CALML4	-34979776	34979776	0.0438871	153576632426553
55737	FOXO1	CHIA	-3497513	3497513	158629	879961764848897
137826	SMAD5	GPR137B	34947988	34947988	11.6311	129343790524038
306827	SCRT1	SCGN	-3493534	3493534	310825	850748358588665
319080	NR3C2	SKAP1	-34887515	34887515	2334.74	106317623414494
155353	NFYC	HMGN3	34866285	34866285	100.533	119976903000536
346158	GATA6	ST3GAL6	-3486583	3486583	4.9841	13302413074008
309763	MTF2	SELENOM	34851674	34851674	100463	899799253982951
103095	SMAD5	ERO1B	34851607	34851607	4686.33	10329167005176
20196	XBP1	ASB9	34836538	34836538	419.461	113773080416072
13594	ARNT	ANXA2	34806028	34806028	8891.21	100510391648183
306586	ETV5	SCG5	34794718	34794718	4.3517	13361340725325
262184	EGR3	PEG10	-34792732	34792732	234409	863002528945878
282173	BHLHE41	PTGER3	34762055	34762055	1.88199	137253838084936
285476	CREB3	RAB26	34756858	34756858	0.00156623	168051442464402
329083	NR4A2	SLC7A2	-3472893	3472893	1.26911	13896500284003
65416	THRB	CPB2	-34707807	34707807	1.40746e+09	485156327170706
179471	RORA	KCNJ11	3469012	3469012	0.0949398	150225515829403
55418	TFDP2	CHGA	3468007	3468007	945332	802441550459696
306820	FOXK2	SCGN	-34667917	34667917	40.196	123958172997755
103180	KLF7	ERO1B	3465963	3465963	44708.6	93496086807215
126135	CIC	G6PC2	3465355	3465355	9347.04	100293257962788
13555	ZSCAN30	ANXA2	34642193	34642193	41.2126	123849700577969
13205	BBX	ANXA10	34635082	34635082	1.48471	138283570685432
282218	SP3	PTGER3	34618147	34618147	1.95967e-05	187078171690302
139691	NFKB1	GPX3	-3461381	3461381	8786.82	100561682644041
103801	MNX1	ESM1	34604967	34604967	2.58822	135869994459489
306434	KLF4	SCG5	-3459186	3459186	472.857	113252701202188
377260	JDP2	TTR	-3458934	3458934	3.42996e+08	446471058316746
13703	MGA	ANXA2	34549836	34549836	82979.6	908102881553376
324843	HSF1	SLC30A8	34546822	34546822	18108.6	974211557549002
109743	KLF3	FAM162B	3454358	3454358	0.000359546	174442455343372
276297	MAF	PPP1R1A	34486514	34486514	152263	881740628773759
387121	EGR1	XBP1	3447677	3447677	0.0820565	150858871282668
208908	ZNF383	MEIS2	34462385	34462385	0.000370335	144314051812329
309723	CTCF	SELENOM	34456413	34456413	33706.4	947228764856145
227212	THRB	NEUROG3	-34407713	34407713	9.22562	130350045814386
262250	NR3C2	PEG10	-3439479	3439479	383.297	114164648221128
9614	FOXP1	ALDOB	-34389313	34389313	10226	999029514517427
348835	KLF13	STMN3	34387935	34387935	0.000584787	172330022427116
268742	NR3C2	PLAGL1	-34166183	34166183	0.000248883	166040044126889
72123	ETV1	CTSZ	34145243	34145243	0.325106	144879748522876
143536	TFDP2	GSTM3	3414391	3414391	205796	868656253524411
13524	NFE2L2	ANXA2	34138028	34138028	5823.53	10234813957659
70047	ZNF281	CRYBA2	34115363	34115363	36.6051	124364587082418
55693	PBX1	CHIA	-34114677	34114677	7.29632	131368959668061
55631	PKNOX2	CHGB	-34109395	34109395	527590455698691	327770306959816
259358	SMAD9	PCSK1N	3408909	3408909	0.155338	148087232103086
309694	FEV	SELENOM	3401331	3401331	2.89158e+06	753886506154347
137864	KLF12	GPR137B	-34004975	34004975	50.3071	122983710049337
100489	PAX4	EMB	-33998277	33998277	373.867	114272824173005
117227	E2F4	FOS	33985306	33985306	46.4923	12332619238407
921	KLF13	ABCC8	33948295	33948295	0.00560383	152515150447171
311916	ZEB1	SERPINF2	33943143	33943143	0.0510844	142917113880801
179410	KLF13	KCNJ11	33941783	33941783	0.000946413	170239192629586
276334	HSF1	PPP1R1A	33923764	33923764	39.2912	1240570510727
276258	MAFG	PPP1R1A	3383235	3383235	120.225	109200054069977
65598	MAFA	CPE	3382508	3382508	552.476	112576869225641
380952	RORA	UPK3A	-33816177	33816177	9.94466e+07	600241017373489
378034	RXRB	TXNIP	33810765	33810765	2.71687	135659312003431
306531	CDX2	SCG5	-3380847	3380847	6.08807	132155201892841
259664	CREB3L2	PCSK2	3380002	3380002	292.518	115338480437419
210564	RFX6	MFAP4	-33718597	33718597	0.0798151	14097914689684
57739	NR2F2	CITED1	-33697896	33697896	13563.2	986763873521513
55416	E2F2	CHGA	-3368574	3368574	2.27923e+06	764221251251866
112594	PLAGL1	FEV	-3365166	3365166	29.2518	115338479909134
139620	ZNF704	GPX3	336468	336468	6.49973	131871045024484
65183	NFIX	COX4I2	33641748	33641748	0.00332273	164785053593838
39173	ZNF250	CALML4	33628117	33628117	6.07716e-05	182162995350703
263360	TFDP2	PFKP	33604957	33604957	1.97009e-05	187055133297413
55527	ZNF143	CHGB	33603467	33603467	1.90617e+06	771983828287007
57768	MTF2	CITED1	-3359949	3359949	1157.05	109366481992416
324776	FOS	SLC30A8	33597566	33597566	59.0735	122286070494719
55439	ELF1	CHGA	-3359276	3359276	7.2661e+06	713869859026583
32618	HSF1	BTBD17	33563502	33563502	0.823202	140844937794619
32579	GATA4	BTBD17	33523478	33523478	0.000199609	17699819031534
377718	SMAD9	TUSC3	3351995	3351995	0.00738977	161313691825648
228783	KLF7	NFE2	33499524	33499524	0.301963	145200465956606
65415	HNF1A	CPB2	3346752	3346752	78651.1	910429504290767
327140	RORC	SLC3A2	-3346058	3346058	1096.61	995994969388948
351594	KLF10	SYT4	33443276	33443276	0.00256884	165902623712355
65617	MZF1	CPE	33441402	33441402	87.1313	120598259569446
117287	NR2F2	FOS	-33429503	33429503	205.823	116865070361119
206644	E2F1	MCM6	33426873	33426873	1.04227e-05	18982019964085
57705	NRF1	CITED1	-33411883	33411883	57.3584	12241402735259
276360	NR4A2	PPP1R1A	3339542	3339542	122476	891195076851044
135383	NR1H4	GLUD1	3337266	3337266	34.9348	12456741825912
327108	SP1	SLC3A2	-33346657	33346657	102.013	119913431608858
259649	EGR3	PCSK2	-33336643	33336643	0.0588469	152302764662594
379596	ZNF467	UCHL1	-33327762	33327762	0.176138	147541476951398
25080	KLF15	B2M	-33318866	33318866	96179.1	901691928671658
152744	ETV2	HIGD1A	33308137	33308137	0.0115835	149361591792716
377925	SMAD3	TXNIP	3329615	3329615	18604.6	973037992458101
55491	IRX3	CHGB	33286966	33286966	5.63832e+06	724884997625507
227315	GATA6	NEUROG3	3328666	3328666	0.0663737	15178003988484
140803	LMX1A	GRIA3	-33268224	33268224	2.48933	136039178272877
369852	RORC	TMED3	-33255618	33255618	0.00372947	164283532479808
262193	E2F1	PEG10	-3325542	3325542	199.511	117000331290262
380905	ZNF394	UPK3A	-3324109	3324109	0.144768	148393266165774
132510	FOXO1	GHSR	3323204	3323204	1.05911	139750577796563
259435	ETV2	PCSK1N	3322663	3322663	0.50077	143003615928964
100274	DBP	ELP4	-3321633	3321633	114.192	119423647886343
372967	HNF4A	TOX	33182923	33182923	8.95339	13048012259196
306049	ATF1	SCG2	3316775	3316775	1.78177e+06	774914845365263
152676	PBX1	HIGD1A	-33161778	33161778	279.297	115539334308717
74831	RORA	DACH1	3314522	3314522	422.665	113740034820193
291089	SMAD9	RBP7	3313912	3313912	0.367317	144349589236097
55468	CREB5	CHGA	-33137362	33137362	1.0828e+07	696545163731441
135365	KLF11	GLUD1	33117816	33117816	226.648	116446479305905
55402	SP3	CHGA	330952	330952	71896.6	91432915678877
13695	NFKB1	ANXA2	3309009	3309009	583728	823378961221847
178337	ELF1	KCND2	-33078816	33078816	0.0749465	151252483580401
74768	TGIF1	DACH1	-3307341	3307341	3.24372	134889562339124
282854	ETV1	PTN	-33042092	33042092	24540.9	961010989852921
137874	PLAG1	GPR137B	-3303536	3303536	4057.45	103917467130687
319093	ELF1	SKAP1	-33030666	33030666	7.56641	131211100289565
100257	ATF2	ELP4	33027053	33027053	368293	843380692796462
379632	FOXO4	UCHL1	-33020902	33020902	0.00667806	161753496298223
306812	FOXJ1	SCGN	33005	33005	47.9632	123190916368753
369799	USF2	TMED3	3299211	3299211	2576.33	105889988158074
329018	NEUROG3	SLC7A2	-3295529	3295529	0.00203621	166911776792071
143589	KLF10	GSTM3	32953855	32953855	3.02817	13518819559023
79542	FOXO4	DIRAS3	-32944616	32944616	180.29	117440291515538
207037	KLF3	MDK	32926936	32926936	1157.83	109363557028862
126153	NR3C1	G6PC2	32915052	32915052	724.967	101396818771257
65435	USF1	CPB2	32894865	32894865	80.4665	120943848031951
369766	EGR3	TMED3	-32840308	32840308	1.08339	139652133154426
103208	ZFP14	ERO1B	3279788	3279788	8.78468	130562741692958
25184	IRF8	B2M	32794774	32794774	35800.1	944611606319575
325753	CREB3	SLC37A4	32778632	32778632	0.150771	14821680803114
207001	CTCF	MDK	32763094	32763094	0.165083	147822970455003
217097	RARA	MT3	32739878	32739878	2099.03	106779822421707
369832	SOX11	TMED3	3272622	3272622	3.67252	134350354348578
296470	ATF4	RGS4	327156	327156	131.015	118826798312601
369900	KLF6	TMED3	3270017	3270017	0.17184	147648754703732
13590	E2F1	ANXA2	-32698084	32698084	2.42833e+06	761469199133391
13566	TBX2	ANXA2	-32696016	32696016	78742.5	910379076490929
178352	NR4A2	KCND2	32692045	32692045	9.55242	120198865534663
135503	ETV1	GLUD1	32672144	32672144	223.165	116513739957065
306526	SOX13	SCG5	-3266057	3266057	1691.18	107718113304838
149889	TCF4	HEPACAM2	3265928	3265928	0.0189496	157224001153779
100263	TGIF1	ELP4	3265701	3265701	12.3229	129092868292269
370463	NRF1	TMEM176A	-32624904	32624904	90.2861	120443793208733
137846	MAZ	GPR137B	-32611642	32611642	287957	754067199172083
55507	PPARG	CHGB	-3260292	3260292	49221.9	930784205121295
152763	SP1	HIGD1A	-32600693	32600693	2.50396	136013728304951
55432	RORC	CHGA	32589555	32589555	8.24099e+08	508402082954266
306174	CREB5	SCG2	-32527804	32527804	935.036	110291717954012
117243	KLF15	FOS	3250493	3250493	119.735	119217772144803
282818	ELF1	PTN	3248965	3248965	0.000148928	178270249516141
217089	ETS1	MT3	32465342	32465342	47949.2	931921821430409
379524	SMAD9	UCHL1	3246429	3246429	25587	959198051434749
117282	ZSCAN31	FOS	32456107	32456107	9188.21	100367690316462
149931	PDX1	HEPACAM2	32448113	32448113	0.0894979	15048187119327
20251	RXRB	ASB9	32441035	32441035	50498.2	929672395594656
93171	TGIF1	EDIL3	32435156	32435156	0.00120061	16920596473808
276371	PPARA	PPP1R1A	3243342	3243342	116.398	119340553792372
117421	FOS	FOSB	3241232	3241232	3386.7	104702232249509
117236	ZFY	FOS	-32403927	32403927	1882.12	107253535166423
282247	RORA	PTGER3	3234849	3234849	1.29567	138875054972262
55752	ETV2	CHIA	3234598	3234598	317.186	114986857494814
306584	ELF1	SCG5	-32341506	32341506	77365.7	91114516140094
20169	TFDP1	ASB9	3233232	3233232	1443.28	984064810831907
369654	RFX2	TM4SF5	3231865	3231865	0.154283	148116831243446
55368	SMAD5	CHGA	-32313887	32313887	1.27445e+07	689467804717928
207072	PPARA	MDK	-32258477	32258477	5465.41	102623771469554
207067	KLF10	MDK	32238897	32238897	99.2309	100033529090574
55447	ETV6	CHGA	-3216423	3216423	246388	860838074360641
268737	NR3C1	PLAGL1	3215611	3215611	1.16511	139336331043789
262227	ZNF613	PEG10	32136865	32136865	4.25825e+07	637076930449385
377977	E2F7	TXNIP	-32128535	32128535	25878	958706857173445
276231	SMAD9	PPP1R1A	3212437	3212437	2.79005e+06	755438864676029
57694	EGR3	CITED1	-32106705	32106705	27775.4	955633967316878
79494	HOXC5	DIRAS3	32101564	32101564	461384	833593789742186
377934	PPARG	TXNIP	3208508	3208508	1644.59	107839413504432
3122	KLF6	ACVR1C	32057825	32057825	0.275848	145593294445112
140735	FOXO1	GRIA3	3204811	3204811	4.88609	133110389350917
55378	ELF2	CHGA	-32039873	32039873	5.34311e+07	527220558056383
135396	GLI2	GLUD1	3203068	3203068	0.174883	14757252391275
126018	MAFF	G6PC2	-3202694	3202694	680.436	111672125079459
79578	ETV6	DIRAS3	-32002147	32002147	401.707	113960910854825
103862	FOXP1	ESM1	-31992625	31992625	1068.74	109711277154898
319065	HEYL	SKAP1	31979486	31979486	430.52	11366006781512
13697	ETV5	ANXA2	-31960122	31960122	1.72635e+06	776287232191758
13648	ATF6	ANXA2	31958304	31958304	247.204	116069449576664
146038	SOX5	H2AC21	31946458	31946458	0.0943563	150252292744922
211496	ARX	MGST1	31936742	31936742	0.00026653	175742542362465
218575	RORA	MTSS1	31928062	31928062	0.025835	155877910316266
13710	RELB	ANXA2	-31919446	31919446	7.29987	131366846934368
79534	CTCF	DIRAS3	31909548	31909548	43051.5	936601186180912
37222	MTF2	CACNA2D1	3190942	3190942	68.4213	121648087806211
432512	KLF7	ZNF664	31903785	31903785	6.22137e-05	182061136312441
152827	FOXN3	HIGD1A	-31902775	31902775	10.1025	129955716214913
253103	SOX5	PAPPA2	-31870726	31870726	33.1837	124790747208406
380870	EGR3	UPK3A	-31866413	31866413	69.1342	121603072381569
306562	HSF1	SCG5	31856686	31856686	457.877	113392508013015
346065	ZBTB37	ST3GAL6	31839605	31839605	0.0411869	153852413895591
192561	TGIF1	LGALS2	31825148	31825148	0.153735	148132267101176
198572	ZNF467	LSAMP	-3181336	3181336	36258	944059605949762
324768	PAX6	SLC30A8	31802732	31802732	5.28163	132772323986024
73355	ZNF467	CXCR4	31774446	31774446	0.000191108	177187210102443
79522	CEBPE	DIRAS3	3176054	3176054	56352.1	924909007502993
369859	ELF1	TMED3	-31753037	31753037	8829.14	100540815041453
307005	MEIS3	SCIN	31742964	31742964	0.0158087	158011049848249
55333	ZFP64	CHGA	31740468	31740468	283758	854705179960989
198579	HNF4A	LSAMP	3173252	3173252	159882	879619965262829
145379	SMAD3	GULP1	31708766	31708766	1089.83	109626402532827
152742	KLF15	HIGD1A	-3170274	3170274	417.03	113798326820758
257610	ETV1	PCDH9	31692706	31692706	0.0698004	151561419496374
76844	SMAD9	DDAH1	31680427	31680427	0.000351154	174545026667819
55441	ETV5	CHGA	3167435	3167435	1.01377e+06	799406256675266
298836	MAFA	RNF152	31651996	31651996	0.0278218	155556151077307
377939	NR2F6	TXNIP	-31647827	31647827	482.071	113168888655018
379583	FOXP4	UCHL1	31641535	31641535	0.299933	145229750977744
93139	THRB	EDIL3	-31626366	31626366	12.8096	128924654630035
55638	ELF1	CHGB	31622536	31622536	3.74106e+06	742700564269196
369595	ELF1	TM4SF4	31614993	31614993	6.49579	131873681979226
306156	HOXD3	SCG2	-31606015	31606015	4109.63	103861972855799
25078	STAT2	B2M	31580344	31580344	552.752	112574697577511
306876	TCF21	SCGN	-3157844	3157844	1.02916e+08	598751712754614
70073	HOXD3	CRYBA2	3155798	3155798	77.4264	121111110028518
61039	FEV	CNTN1	-31541582	31541582	0.134219	138721851207294
309748	ETV1	SELENOM	-315153	315153	7.09986e+07	61487501892302
65514	KLF11	CPE	-31500477	31500477	136.151	118659784700671
74747	PAX6	DACH1	31499106	31499106	29839.2	952521254350296
306600	ELF3	SCG5	-31486977	31486977	308833	851027621688306
13674	NFE2L1	ANXA2	31484418	31484418	1.28285e+06	789182253555582
327158	ZFP14	SLC3A2	31469386	31469386	0.947712	130233237661729
262213	TCF12	PEG10	31432614	31432614	62.1347	112066659888362
65588	CREB3	CPE	3141551	3141551	3338.94	947639164847248
135406	ELF2	GLUD1	31396016	31396016	0.00026543	175760503559755
368366	E2F1	TK1	3139215	3139215	21302.2	967157480082116
57112	ONECUT2	CHST9	31383283	31383283	9.4976e-06	190223859745592
70005	HOXA5	CRYBA2	31373236	31373236	24.8838	126040834514874
3027	RFX6	ACVR1C	-31372942	31372942	20.1035	126967281479385
20197	ZNF821	ASB9	31368952	31368952	81.6564	120880097830532
390686	FOXP1	ZBTB20	3136241	3136241	1653.36	107816331832336
288494	ZNF385D	RARRES2	31336814	31336814	0.931878	140306410625153
377283	RARA	TTR	-31328835	31328835	7.59373e+07	611954468777113
380841	ZNF662	UPK3A	-31315077	31315077	66699.3	917587846536634
13713	GTF3A	ANXA2	31312503	31312503	1.15761e+07	693643788096704
261703	KLF15	PDX1	-31298447	31298447	0.000243485	176135272225577
329460	KLF10	SLC7A8	-31295255	31295255	20.6915	116842081444296
65544	CREB3L2	CPE	3129498	3129498	18792.7	972601162983794
137835	E2F1	GPR137B	-31290956	31290956	9386.62	100274907445677
244566	BHLHE41	NRXN1	31270128	31270128	0.000924077	17034292004165
57737	TFDP2	CITED1	31269684	31269684	34250.5	946533315196785
70029	FOXP4	CRYBA2	-3126163	3126163	241.476	116171268719622
103105	E2F1	ERO1B	-3125864	3125864	4226.82	103739858832613
167081	KLF7	IGFBP2	3124826	3124826	68.1511	121665273572651
55655	RARG	CHGB	31242035	31242035	7.35486e+08	513342549618865
139683	STAT3	GPX3	-3121834	3121834	11.8901	119248147606392
259152	NR4A2	PCSK1	31218333	31218333	0.885713	140527068473007
126139	FOXA1	G6PC2	-31201094	31201094	51450.9	928860715655989
379708	KLF10	UCHL1	31200822	31200822	2.48881	136040077299028
9422	POU3F1	ALDOB	-31200014	31200014	47.7577	12320956994622
55833	FOXQ1	CHIA	31189594	31189594	0.000232845	176329330592761
373015	KLF5	TOX	-3118925	3118925	735.429	111334589872605
262212	TGIF1	PEG10	3118611	3118611	3522.82	104531101217705
259748	ZNF385D	PCSK2	3115886	3115886	2.58514	135875161082174
290993	IRF3	RBP2	31145327	31145327	282.018	115497236852379
327132	NR2F2	SLC3A2	-31117233	31117233	203873	869064090732069
55584	KLF12	CHGB	31112492	31112492	3.93896e+06	740461812764321
311821	FOXO1	SERPINF2	-31092104	31092104	0.00246354	166084404690616
282836	NR4A2	PTN	31078171	31078171	0.0599804	14221990343783
217120	RXRB	MT3	31070957	31070957	18.2721	127382106187722
100323	RARG	ELP4	-31061223	31061223	0.0142525	158461096823488
126099	CREB1	G6PC2	-31043826	31043826	14484.9	983908440322042
126044	ARID3B	G6PC2	-3103145	3103145	160.952	117933031152522
143505	MLX	GSTM3	31028753	31028753	23.2723	12633160872826
259757	KLF5	PCSK2	-31028127	31028127	127024	889611395267345
306464	NR2F6	SCG5	-31023234	31023234	2.31512e+06	763542645592429
93259	MEIS2	EDIL3	-31021357	31021357	1.07296	139694179361115
377336	TFDP1	TUBA4A	31006796	31006796	0.0831087	140803535987536
3105	NR4A2	ACVR1C	31002577	31002577	12.6905	128965206947373
167045	KLF13	IGFBP2	-31002073	31002073	1.51204	138204375042546
387895	RORA	YBX1	-30951306	30951306	2.05445e-07	20687303966358
13685	GLIS2	ANXA2	3094654	3094654	96981.5	901331100397302
387162	ZNF250	XBP1	30931091	30931091	6.02863	132197812649217
379685	NFIA	UCHL1	-30926561	30926561	10425.1	99819189902026
306501	ETV2	SCG5	30894555	30894555	55.1222	122586733975129
259732	CREB3	PCSK2	30870892	30870892	177782	875011169960058
380897	RARA	UPK3A	30861337	30861337	1.35709e+06	786739141640748
306860	PKNOX2	SCGN	30860918	30860918	1.09668e+06	795992132800425
378009	RARA	TXNIP	30841785	30841785	12.5353	129018648148166
198553	EGR3	LSAMP	-3083366	3083366	4223.75	103743021583206
65422	TP53	CPB2	-30830115	30830115	59.0794	122285642624562
276236	TCF7L2	PPP1R1A	-30826407	30826407	0.0120713	159182476714034
309708	CREB3L2	SELENOM	-30801062	30801062	20581.6	968652046497095
132608	NR3C1	GHSR	30785093	30785093	0.206592	146848857103713
167005	E2F4	IGFBP2	30784443	30784443	132.443	118779704508777
378039	HSF1	TXNIP	3074474	3074474	5884.53	102302884069382
20259	ZNF84	ASB9	-30743117	30743117	0.156412	148057291207218
306173	FOXA3	SCG2	3072765	3072765	5.03691e+06	72978355092186
309669	SMAD4	SELENOM	3071974	3071974	20839.1	968112099451902
20229	NFATC3	ASB9	-30706907	30706907	567.862	112457574646443
13665	MEF2C	ANXA2	-30670892	30670892	3.26006e+07	648677489223861
105790	NKX6-1	ETV1	-30667733	30667733	19.5116	12709707173068
377645	RORA	TUBB2B	-30660981	30660981	1.11478	139528102717336
235782	XBP1	NME2	30640524	30640524	12.761	128941163852531
306175	MEIS3	SCG2	3060968	3060968	98.4678	120067056474656
13709	KLF5	ANXA2	30604903	30604903	16588.8	978018565659386
309760	BCL11B	SELENOM	30588051	30588051	75.0954	121243866072067
20258	HSF1	ASB9	30570805	30570805	358.601	114453880563617
282821	MAFA	PTN	30559756	30559756	67360.2	917159687762805
379604	IRF6	UCHL1	30544363	30544363	4.91531e-05	173084492772317
346090	EGR3	ST3GAL6	-30537078	30537078	1041.14	109824902042365
380862	NR1H4	UPK3A	30536447	30536447	39045	940843497504857
369643	E2F4	TM4SF5	30519078	30519078	66.4149	121777346867812
380920	NFATC4	UPK3A	30512685	30512685	5.7656	132391554915412
369561	NKX2-2	TM4SF4	30502431	30502431	432.789	11363723760023
369719	RORA	TM4SF5	-30496813	30496813	12650.3	989789824308635
47468	THRB	CDA	-30487588	30487588	607.276	112166141092302
55764	USF1	CHIA	3047924	3047924	310.114	115084789869513
294705	FOXP1	RFX3	30477792	30477792	0.000354056	17450927931791
379584	ETV2	UCHL1	30472556	30472556	0.906699	140425369219631
282167	KLF11	PTGER3	-30461708	30461708	10.3499	129850646111194
377282	CDX4	TTR	-30455677	30455677	709780382181261	314887600840934
276237	ZBTB7B	PPP1R1A	-30455247	30455247	431.999	113645170533226
207051	KLF7	MDK	30449359	30449359	113.273	109458733345428
377268	IRX6	TTR	-3043841	3043841	6.89649e+07	616137214407634
306139	HSF1	SCG2	3042821	3042821	261016	858333225522347
306155	CREB3L4	SCG2	-30416416	30416416	1.47157e+08	58322191157906
74776	KLF12	DACH1	3037692	3037692	695.534	111576815818547
65583	ZNF444	CPE	-3037601	3037601	0.674017	141713294049885
192542	KLF15	LGALS2	-30374559	30374559	20.2317	126939674021329
103156	E2F2	ERO1B	-3037417	3037417	534.864	112717569729505
117570	JUNB	FOSB	30373326	30373326	37.8269	124221993171823
235824	USF2	NME2	3034604	3034604	0.380674	144194471800241
5965	MEIS2	ADRA2A	-30320585	30320585	0.00683626	16165181130678
117316	ELF3	FOS	-30308973	30308973	1987.7	107016491837485
79550	VEZF1	DIRAS3	30298123	30298123	1208.42	109177825031286
390720	MEIS2	ZBTB20	30291235	30291235	0.00895168	150480953139265
296385	TFDP2	RGS2	30288734	30288734	1.5354e-06	1981377724067
379678	ELF1	UCHL1	-30278062	30278062	0.741255	141300322921077
291025	ETV1	RBP2	-30266454	30266454	3.6604	134364711065858
259422	RFX6	PCSK1N	-3026247	3026247	0.339057	134697275041628
109692	NR1H4	FAM162B	30259373	30259373	178.025	107495193366271
100297	CREB3	ELP4	30255377	30255377	2.21466	13654692493837
57672	ZFP64	CITED1	30241529	30241529	136.533	118647631029267
137886	NR3C2	GPR137B	-30219004	30219004	863.345	11063815595892
13562	JDP2	ANXA2	-30192317	30192317	164082	878493813523927
373011	FOXP1	TOX	30189738	30189738	24094.4	961808354066953
198547	NR1H4	LSAMP	-30182643	30182643	12.6476	128979902670092
282212	TCF12	PTGER3	-30156614	30156614	830.131	110808535557826
134999	ELF2	GLS	301549	301549	0.00144504	168401206335433
368364	E2F7	TK1	30147094	30147094	68266.7	816579089270132
139679	VEZF1	GPX3	3013864	3013864	152.189	118176172955317
93154	RFX2	EDIL3	-30134663	30134663	0.0169732	157702352049742
103751	RFX6	ESM1	-3012835	3012835	20.5381	126874395057864
101722	ATF1	ENPP2	30117944	30117944	300.556	115220743843737
39222	NR4A2	CALML4	30099532	30099532	0.00686983	161630539422763
235919	MAX	NME2	30073337	30073337	3.74982	134259891225161
291145	ZNF467	RBP7	-30070642	30070642	0.00366275	16436192189682
103190	ZNF333	ERO1B	30062674	30062674	1.96026	137076868973301
139661	ZNF281	GPX3	-3005386	3005386	1362.49	108656671630681
13728	FOXA3	ANXA2	-30053424	30053424	552462	825769765516324
282807	NR2F2	PTN	30037776	30037776	0.000710142	171486548893925
208891	SMAD4	MEIS2	30029109	30029109	0.136609	148645215150641
34854	THRB	C4BPB	-30022696	30022696	0.0165953	157800146554773
79560	KLF3	DIRAS3	29986294	29986294	1031.96	109863365788068
100214	ATF1	ELP4	29975984	29975984	12.488	129035083396003
32590	TGIF1	BTBD17	29960403	29960403	0.652595	131853565702201
348795	EGR3	STMN3	-29953178	29953178	1087.19	109636940989239
319036	HNF4A	SKAP1	29932607	29932607	71.9102	12143209311672
156655	PLAGL1	HOGA1	29923707	29923707	1.05665e-05	189760696102135
259728	HSF1	PCSK2	2991426	2991426	73.0028	11136660340482
217127	ELF4	MT3	-2991282	2991282	0.700623	121545155286903
369712	KLF10	TM4SF5	29907973	29907973	42.0964	123757555502592
318964	SMAD9	SKAP1	29897517	29897517	0.0158084	158011117864178
145471	KLF10	GULP1	29893616	29893616	9109.42	100405092234557
369721	TFDP1	TMED3	29891223	29891223	31.4554	115023048094567
65549	KLF15	CPE	-29886918	29886918	4.83736e+06	73153913935604
139642	KLF15	GPX3	-29883692	29883692	52.6252	122788065933282
20120	IRF7	ASB13	29845757	29845757	2.9896e-06	195243871915933
103099	CREB3L1	ERO1B	29837532	29837532	0.033834	154706462817095
395318	TCF12	ZEB1	2983105	2983105	0.00162352	16789543620112
290988	LMX1A	RBP2	-29803932	29803932	88628.4	90524269602221
369616	JUNB	TM4SF4	29783148	29783148	16115.6	979275410825458
209115	IRF8	MEIS2	-29781323	29781323	23808.6	962326525422674
103103	ZFY	ERO1B	-2975993	2975993	0.140175	148533279270205
348752	TFDP1	STMN3	29747186	29747186	129.516	118876755391461
237474	NR4A2	NOVA1	29738823	29738823	0.00498929	163019615571504
139716	NFKB2	GPX3	29733432	29733432	46290	933451300774724
143591	MAX	GSTM3	2970614	2970614	4573.33	103397674041491
89673	E2F7	DUT	29695367	29695367	390218	840869282560513
192564	TFAP4	LGALS2	-29692732	29692732	0.343141	144645276438856
207041	GLIS2	MDK	-29647226	29647226	74.2019	121295849055861
103158	NHLH1	ERO1B	2964708	2964708	174.431	117583772589194
306847	SOX11	SCGN	29627983	29627983	1.98767e+06	77016560392075
259336	ASCL2	PCSK1N	29620454	29620454	30.8748	125103951444425
32592	SP1	BTBD17	-29560085	29560085	23.2224	126340919954255
259461	USF1	PCSK1N	2953141	2953141	0.0679899	141675559073836
369843	ARX	TMED3	29528925	29528925	16.511	117822271273702
306482	THRB	SCG5	2952725	2952725	5949.35	102255302596626
55483	TFDP1	CHGB	29507492	29507492	4.41903e+06	735467258234919
55640	ATF3	CHGB	-29503938	29503938	328630	848329258897624
378091	PPARA	TXNIP	-29479483	29479483	6361.56	101964362630907
59902	STAT1	CLU	29463368	29463368	0.000101043	179954938417588
395313	HNF4A	ZEB1	29463144	29463144	0.00513028	162898593018577
9449	RFX3	ALDOB	-29447885	29447885	145.676	108366122027854
55470	ZBTB26	CHGA	29441152	29441152	23513.7	962867990673587
103150	TCF7	ERO1B	2942769	2942769	301.317	115209769807161
377242	IRX3	TTR	-29397892	29397892	8.84389e+07	605335656694761
282757	SMAD5	PTN	29385788	29385788	26506.4	957664967614697
135102	ARX	GLS	2937365	2937365	0.0308222	155111361723295
105788	POU3F1	ETV1	2935534	2935534	0.000362563	174406159487096
244615	FOXP4	NRXN1	29347098	29347098	2.88919e-07	185392235746148
369596	NFIA	TM4SF4	29318966	29318966	5.16745e-05	182867239156615
61172	RORA	CNTN1	29317537	29317537	0.0213218	156711757036619
306029	GMEB1	SCG2	-29304318	29304318	5193.45	10284544394551
167014	THRB	IGFBP2	-2930359	2930359	444377	83522487634991
380874	GLI2	UPK3A	29286906	29286906	67.1929	111726765654958
109480	PLAGL1	FAM155A	29280718	29280718	0.0180725	157429826879564
55711	BHLHE41	CHIA	29264698	29264698	9.319	130306305607925
346092	SMAD5	ST3GAL6	29231988	29231988	479.875	113188719790377
149886	TCF12	HEPACAM2	29191747	29191747	24.3648	12613236542894
100497	ETV1	EMB	-29189026	29189026	0.0705502	151515015720936
291052	KLF10	RBP2	-29179262	29179262	0.000849309	170709343786211
259598	RORA	PCSK1N	29175242	29175242	29.3306	125326792787701
55435	EHF	CHGA	-29165952	29165952	65802.5	918175779254991
380876	ARID3B	UPK3A	29164227	29164227	2428.41	10614678335245
325654	SMAD9	SLC37A4	291534	291534	0.000162045	177903639309883
327096	TP53	SLC3A2	-29146465	29146465	40143.3	939638678486946
276351	NR2C1	PPP1R1A	-29139977	29139977	209.11	116796249813248
137843	MBD2	GPR137B	-2913961	2913961	59679.1	922417793122513
253164	SP1	PAPPA2	-29136809	29136809	1.36994	138632983827722
208914	SMAD3	MEIS2	-29124286	29124286	5.89561	132294711682312
47480	ZFP42	CDA	29104223	29104223	6455.41	101900759968658
252141	LMX1A	P2RY14	-29101757	29101757	5.52775	132574514944998
155351	PAX6	HMGN3	2908734	2908734	0.0649216	151876108708436
126079	ATF6	G6PC2	2908537	2908537	4602.37	103370187807942
167017	GLI2	IGFBP2	29082509	29082509	1.96545	137065375875962
100311	ELF1	ELP4	-29079312	29079312	289.693	11538061264561
13818	PAX6	ANXA4	29071953	29071953	0.0273246	155634459540794
57685	DNMT1	CITED1	29066537	29066537	435.176	113613354353425
377250	NEUROD4	TTR	29062433	29062433	130360	888485683767818
117294	CREM	FOS	29057814	29057814	12723.4	989539543363302
235877	CREB3	NME2	2905614	2905614	0.0123004	149100822990945
57735	E2F2	CITED1	-29044691	29044691	64383.8	919122363208334
200260	E2F1	MAD2L1	29034127	29034127	0.124964	149032154841224
309720	SRF	SELENOM	29020905	29020905	2733.49	105632826685114
65479	NR4A2	CPB2	29010892	29010892	4.9775e+07	63029885103921
103165	ZNF189	ERO1B	29010002	29010002	3.69049	134329157734259
209117	KLF10	MEIS2	-29004695	29004695	44.7551	123491573465177
208928	ZNF704	MEIS2	-28996883	28996883	0.151525	148195167756755
372931	NR1H4	TOX	-28993893	28993893	2.11145	136754182638863
329424	SOX11	SLC7A8	28981978	28981978	94.8923	12022769061537
13654	E2F5	ANXA2	-28979812	28979812	9.94373e+06	700245087418323
207020	E2F5	MDK	28977536	28977536	2.45672	136096446209676
378040	NR3C1	TXNIP	2896402	2896402	4129.96	103840539420751
306593	ETV6	SCG5	-28963072	28963072	29.2106	125344591225516
93142	RFX6	EDIL3	-28958278	28958278	0.00081551	170885709439118
227217	RFX6	NEUROG3	28957495	28957495	54.8494	122608281892188
258478	E2F2	PCLAF	28952524	28952524	1.51385e+06	781991806750232
94513	RORA	EFNA5	2892888	2892888	0.00101849	169920436738539
139684	HSF1	GPX3	28915044	28915044	48.3508	123155965460073
276226	SMAD3	PPP1R1A	28888887	28888887	2.19178e+06	765920300401979
37082	ASCL2	CACNA2D1	28886784	28886784	2498.41	106023356455693
226035	TFDP2	NEUROD1	2887974	2887974	0.00141371	158496390169919
13580	SMAD5	ANXA2	28872477	28872477	6.68592e+06	717483893804698
152704	HOXA5	HIGD1A	-28872332	28872332	6169.24	10209768354647
259384	JDP2	PCSK1N	-28870188	28870188	535.919	112709010603383
318992	ZBTB7A	SKAP1	-28866712	28866712	4.01407	133964145767423
283178	RORA	PTPRD	28852088	28852088	0.000434371	173621389940868
100341	MZF1	ELP4	28841376	28841376	11.0089	12958254464372
101761	BBX	ENPP2	28835129	28835129	0.125086	149027908298526
55449	RARG	CHGA	-2882589	2882589	2.54952e+07	659354234698213
259441	ZNF467	PCSK1N	-28825121	28825121	2408.58	10618238077524
70042	FOXK2	CRYBA2	28822528	28822528	1.84393	13734255185655
5782	NKX6-1	ADRA2A	28800603	28800603	4.70894e-05	183270771399997
13309	MEIS3	ANXA10	2880005	2880005	1878.63	107261577135254
25073	E2F1	B2M	-28798888	28798888	329.362	114823260365252
2982	TFDP1	ACVR1C	28792793	28792793	1111.62	109540454503827
103094	PAX6	ERO1B	28789569	28789569	100.182	119992109965793
9558	TFEB	ALDOB	-28788695	28788695	16253.4	878905601665084
180386	CREB3	KCNK16	28777482	28777482	5.04379	132972433479314
259328	TFDP1	PCSK1N	28777162	28777162	0.492933	123072122054672
276347	KLF7	PPP1R1A	2876386	2876386	204.971	11688306727086
329107	ZEB1	SLC7A2	28757883	28757883	2.56838	135903399749618
126064	ETS1	G6PC2	-28755292	28755292	15.9056	127984513049761
261809	MAX	PDX1	28754383	28754383	18.4548	127338915762409
235843	MLX	NME2	28733594	28733594	3.80669e-05	184194521476994
9431	ZBTB7B	ALDOB	-2873216	2873216	627124	820264634952721
259447	USF2	PCSK1N	28721714	28721714	1438.41	108421183322211
210585	BACH1	MFAP4	-28714918	28714918	0.629839	142007702825766
55578	MAFK	CHGB	-28713135	28713135	7.25192e+07	613954680168518
79541	ETV3	DIRAS3	28710963	28710963	9832.4	100073403862982
369740	KLF11	TMED3	28700046	28700046	1.23842e+06	790713147972103
291054	MAX	RBP2	28686244	28686244	62.721	122025869819753
39114	ETV2	CALML4	2867681	2867681	0.00114453	169413724096439
294600	FEV	RFX3	2867477	2867477	49.1081	12308846598447
55530	HOXC5	CHGB	-28659353	28659353	1.01458e+07	699371175006088
143566	CREB3L4	GSTM3	-28654795	28654795	7890.72	101028832615649
20279	FOSL2	ASB9	-28654082	28654082	87762.4	905669168907975
143446	EGR3	GSTM3	-28653355	28653355	0.00633645	16198153767365
139658	ETS1	GPX3	-28627506	28627506	561520	825063464649988
253108	NR2F6	PAPPA2	-28622556	28622556	3019.59	105200525310099
55839	ETV1	CHIA	28621966	28621966	149.25	118260849201692
55446	NR2C1	CHGA	-28616784	28616784	2.91566e+06	653526300024926
387800	NR4A2	YBX1	28616482	28616482	0.000423101	173735563568815
298756	THRB	RNF152	2859995	2859995	30.3735	105175051650586
309725	KLF13	SELENOM	-28598752	28598752	1312.7	108818344545452
306520	ZNF281	SCG5	-28590892	28590892	46.6567	123310862427496
117218	ATF1	FOS	28588157	28588157	1.51592e+07	681932413244048
105931	ARX	ETV1	28588064	28588064	0.0738737	131315103147112
74818	NR4A2	DACH1	28585054	28585054	1550.78	980945054294213
65613	MEIS3	CPE	28575612	28575612	80300.9	90952796698134
117308	THRA	FOS	-28567372	28567372	2.71157e+07	656677883845401
37201	KLF7	CACNA2D1	28562116	28562116	0.324036	144894062449993
39130	HNF4A	CALML4	2855432	2855432	35.8738	124452220657224
390698	NR4A2	ZBTB20	-28546764	28546764	147.47	11831296557995
380844	ZFP64	UPK3A	-28533706	28533706	10501.4	997875346424465
346110	MAZ	ST3GAL6	2851887	2851887	60.6325	122172943673632
259554	GATA6	PCSK1N	-28518131	28518131	0.00436299	163602159879351
306524	SP3	SCG5	28509084	28509084	0.0441026	153555362500746
55409	PTF1A	CHGA	-28481957	28481957	192269	871609182904603
206960	ZBTB7A	MDK	-28468031	28468031	3.15545	135009383097809
328967	USF2	SLC7A2	28466655	28466655	58.1643	122353437490258
100485	MEIS3	EMB	2846177	2846177	2089.62	106799335522178
38417	HSF1	CALB1	28457263	28457263	224.643	116485078364783
126142	MEIS3	G6PC2	-28446125	28446125	214.449	11668675936422
60004	LMX1A	CLU	-28417958	28417958	0.272796	145641624529502
103062	ZNF383	ERO1B	2841348	2841348	8897.71	100507216908723
300389	NEUROG3	ROS1	2840112	2840112	0.0101464	159936893759931
282806	NFE2L1	PTN	-28390385	28390385	70.5443	121515377987825
55485	TFAP2C	CHGB	-28385201	28385201	118655	892571429954025
207064	BCL11B	MDK	28374951	28374951	9.84209	130069127224321
152725	EGR3	HIGD1A	-28374342	28374342	35476	945006482687788
253187	LMX1A	PAPPA2	-28324049	28324049	1.45875e+08	583601970586074
101366	THRB	ENO2	28323993	28323993	0.0191057	157188362883958
139635	E2F7	GPX3	-28313657	28313657	27732.3	955701379363159
244732	ZEB1	NRXN1	28287696	28287696	1948.41	107103190649575
210654	GTF3A	MFAP4	28276145	28276145	3.48993	134571837644806
65499	TFDP1	CPE	2825476	2825476	6695.36	101742260137069
296516	GATA6	RGS4	28230745	28230745	30363.1	951765395993932
79586	NR2F1	DIRAS3	-28223397	28223397	977305	800997001911213
227197	RFX3	NEUROG3	28207418	28207418	139.838	118543748907704
100235	UBP1	ELP4	28187571	28187571	1.98346	137025773646459
369669	KLF12	TM4SF5	-28185826	28185826	0.000218126	176612922024499
3004	ZNF704	ACVR1C	28185727	28185727	46.1591	123357429457207
13734	RUNX1	ANXA2	-28182458	28182458	4.55113e+08	53418804960184
311810	NR1H4	SERPINF2	28178439	28178439	3.10396	135080833421717
309677	ZBTB37	SELENOM	-2817322	2817322	1.25206e+07	690237482119451
126141	FOXA3	G6PC2	-28171273	28171273	1.69726e+07	677025152782664
103867	GATA6	ESM1	-28167892	28167892	5.58622	132528822671738
165415	LMX1A	ID1	28166048	28166048	43.4581	123619293507305
167024	HEY2	IGFBP2	-28160175	28160175	21.1483	11674724629382
25277	PAX4	B3GAT2	28155457	28155457	0.00350286	164555771254972
261636	TFDP1	PDX1	28153224	28153224	2304.23	106374747144936
387163	TFDP2	XBP1	28153192	28153192	469.599	113282725075323
117306	MAFA	FOS	-2815256	2815256	7187.63	101434141656416
3023	GLI2	ACVR1C	28152198	28152198	0.028593	15543740576763
20291	RUNX1	ASB9	-28122451	28122451	2273.6	106432852093207
268636	BHLHE41	PLAGL1	28121462	28121462	0.0150591	158222005719734
13295	NR4A2	ANXA10	28093848	28093848	418.117	113787023746371
351493	SIX6	SYT4	-28024636	28024636	0.0155013	158096324526116
390687	THRA	ZBTB20	28017845	28017845	7.84755	12105265948031
299272	BBX	ROBO2	2801356	2801356	0.000382674	174171714429841
65437	TFAP4	CPB2	-28012395	28012395	103.387	11985532195067
100244	HLF	ELP4	28010271	28010271	44.5305	123513419721995
89768	RORA	DUT	-28007546	28007546	0.0239087	156214434871787
100271	CDX2	ELP4	-28000558	28000558	13468.1	987069501844388
9457	HOXC5	ALDOB	-2798197	2798197	117.855	109286502135392
377657	CREB3L4	TUBB2B	27978834	27978834	0.000139404	178557262285873
103197	ZNF180	ERO1B	27977232	27977232	802.376	110956221753755
139696	ETV6	GPX3	-27974853	27974853	3296.19	948198757106954
103831	E2F2	ESM1	-27966859	27966859	19.9191	127007302325232
103183	NR2C1	ERO1B	27951518	27951518	6193.63	102080546822489
74750	ZNF304	DACH1	27937602	27937602	1160.53	10935342141941
65455	ZNF169	CPB2	-27936742	27936742	5233.24	102812297174794
258837	HOXD3	PCNA	2792266	2792266	2698.04	105689512715621
318961	SMAD3	SKAP1	27920756	27920756	0.883072	140540038618613
166989	KLF11	IGFBP2	27915122	27915122	0.134863	138701067855275
369739	SMAD9	TMED3	2789765	2789765	287.563	11541266392359
378088	RXRG	TXNIP	-27896238	27896238	5.61018	132510230750896
57707	MBD2	CITED1	27880639	27880639	6431.91	101916599379746
9517	HNF4A	ALDOB	27856244	27856244	980.726	110084521445174
369878	NR4A2	TMED3	27848482	27848482	154048	881234436657351
306232	STAT1	SCG3	27833574	27833574	0.00103713	169841672830378
372939	PAX6	TOX	27822375	27822375	1.29768	138868311869718
180441	KLF10	KCNK16	27812732	27812732	2.99581e-05	185234863118573
13556	RUNX2	ANXA2	-27803255	27803255	98370.4	900713576399282
259141	CREB3	PCSK1	27797982	27797982	4.3971	123568336708123
369737	SMAD3	TMED3	27754745	27754745	1.62501	137891445301088
13657	ZNF2	ANXA2	27748037	27748037	7.2694	131385016704704
369547	RFX6	TM4SF4	2773027	2773027	1022.41	109903741585618
306263	BBX	SCG3	27724251	27724251	0.13154	14880942402391
306548	NKX1-1	SCG5	27719421	27719421	5754.3	102400076953035
47545	KLF5	CDA	27717045	27717045	47.2628	123254806691418
285518	RORA	RAB26	-27713666	27713666	637.926	111952293928426
276376	KLF6	PPP1R1A	27713386	27713386	3259.09	104869030414557
101758	CREB3L2	ENPP2	27702343	27702343	1.75912	137547046246229
268743	CDC5L	PLAGL1	27687555	27687555	1532.25	108146700796522
9638	HMBOX1	ALDOB	-27676094	27676094	4348.94	936161637483108
259651	FOXK1	PCSK2	27656075	27656075	546.843	112621369978923
248749	SMAD9	OPCML	27655734	27655734	1.03824e-06	199837038716353
253132	CUX2	PAPPA2	-27649855	27649855	4233.6	103732905353702
74786	FOXA2	DACH1	2764869	2764869	2151.23	106673133239135
214481	ZNF467	MPP3	-2764711	2764711	0.0631531	151996050532574
47465	EGR3	CDA	-27641553	27641553	33.5493	104743161870169
25187	MEIS3	B2M	-27640617	27640617	5495.35	10260004270474
65472	CREB3L4	CPB2	-2763638	2763638	18.7357	127273309755662
211423	NR1H4	MGST1	276283	276283	0.0504051	152975253712186
259694	FOXP2	PCSK2	27625509	27625509	53.6871	122701299642963
380910	EBF1	UPK3A	2762444	2762444	0.529404	142762129750359
55597	E2F5	CHGB	27612567	27612567	2.79478e+06	755365273179139
276215	NFATC2	PPP1R1A	-27607614	27607614	110559	895640481237436
79498	EGR3	DIRAS3	-27595	27595	4.00566e+07	639732640328651
202202	FOSB	MAP1B	-27590796	27590796	46.7131	123305610088993
369646	GLI2	TM4SF5	27581584	27581584	6758.28	101701635022025
329402	ZBTB17	SLC7A8	2757227	2757227	71.5864	111451695869355
103075	ATF1	ERO1B	2756458	2756458	168081	877448149865555
32546	YY1	BTBD17	27552957	27552957	306.199	115139957158718
55760	FOXJ3	CHIA	-27535457	27535457	7936.34	910037993410387
174246	MAFK	ISL1	2749515	2749515	3141.43	105028732834804
143593	RXRA	GSTM3	27492799	27492799	2.481	136053736626935
387091	ASCL2	XBP1	27490474	27490474	0.064169	151926749802774
380547	RORA	UNC80	27486729	27486729	11.345	12945195912212
306843	RFX1	SCGN	27486572	27486572	543489	72648093813817
143486	MAZ	GSTM3	27477289	27477289	2.8424	135463145750242
276206	TFDP1	PPP1R1A	27466992	27466992	326871	848562318688835
380852	PPARG	UPK3A	27449006	27449006	3164.87	104996447796695
55633	MEOX2	CHGB	-27448563	27448563	465221	833234047316194
331443	E2F7	SMC2	27429586	27429586	0.0267255	155730741210909
306579	ESRRB	SCG5	-27423304	27423304	7287.54	10137419141068
259407	PAX6	PCSK1N	27420763	27420763	21.0677	126763824497563
145418	HNF4A	GULP1	27392702	27392702	26.5	12576754712315
387168	HSF1	XBP1	27355513	27355513	1.00391	13998305677012
20170	TFAP2C	ASB9	27348693	27348693	616.951	112097493715415
145387	ZNF704	GULP1	27333735	27333735	21.5857	126658328682724
55392	FOXK2	CHGA	27333068	27333068	124308	890550022996342
296446	PBX1	RGS4	27326254	27326254	70365.2	915264199792065
380880	BBX	UPK3A	27305508	27305508	6.88002e+06	716241042884712
192552	KLF2	LGALS2	-27276322	27276322	3.18178	134973303759197
135380	STAT1	GLUD1	27269304	27269304	23.8283	126229068343147
214438	SMAD9	MPP3	27266864	27266864	0.77272	141119778435916
253258	RORA	PAPPA2	27266642	27266642	28315.7	954797272680113
329029	TFDP2	SLC7A2	-27261235	27261235	26.6423	125744288181953
139590	MAX	GPX1	27245287	27245287	9.73843e-05	180115110567533
259561	ELF3	PCSK1N	-27228292	27228292	2980.03	10525779183539
369733	IKZF2	TMED3	-2718134	2718134	0.00218215	166611156549653
134929	NKX6-1	GLS	-27168324	27168324	841.403	110749959465566
100342	RORA	ELP4	27163904	27163904	9875.67	900543339151531
13741	KLF6	ANXA2	-27150284	27150284	3.63148e+06	743991687033077
55834	ZEB1	CHIA	-27146151	27146151	1460.18	108355930780237
109006	ETV1	FABP5	27135348	27135348	18.4613	127337381239831
253093	ELK3	PAPPA2	27134405	27134405	217.82	116619017856745
101739	EGR1	ENPP2	2711755	2711755	4.17799	13379032421814
261757	E2F2	PDX1	-27102925	27102925	0.215655	146662396231331
285432	MECP2	RAB26	27095646	27095646	0.930571	140312503085305
65468	ELF1	CPB2	-27095262	27095262	6.08703e+09	421559443133878
55534	EGR1	CHGB	27094562	27094562	1.27303e+09	48951628742843
207069	RXRA	MDK	-27074914	27074914	13.5736	128673035283683
135114	RORA	GLS	27072847	27072847	0.000642848	171918920223739
143580	NR4A2	GSTM3	27069557	27069557	450923	834589778579817
891	ELF2	ABCC8	2706034	2706034	1.83428	137365351406599
117263	RARA	FOS	-27050687	27050687	8.21219	130855411883277
55355	NR1H4	CHGA	-2704179	2704179	9.18032e+07	603714233923014
306148	CREM	SCG2	27040299	27040299	2.60392e+07	658437230522929
103068	KLF11	ERO1B	-27036687	27036687	325365	748762872569458
79515	FOXP4	DIRAS3	27036075	27036075	2.36205e+06	762671024586822
259633	MECOM	PCSK2	-27034998	27034998	38.1817	124181441778036
380924	EGR2	UPK3A	27014032	27014032	30181.3	952026166487238
65434	HNF4A	CPB2	27000822	27000822	2.15568e+06	766641482579318
278406	CDC5L	PREB	26998864	26998864	0.0172198	157639708916641
74827	MEIS3	DACH1	26985997	26985997	43.1622	123648961020086
252094	ISL1	P2RY14	26985543	26985543	8775.02	100567520663644
259233	MEIS3	PCSK1	26978742	26978742	0.0491414	153085522534018
276350	ZNF385D	PPP1R1A	26971322	26971322	315.563	1150091363115
276320	E2F5	PPP1R1A	26970739	26970739	7.21486e+06	714177230586856
299348	LMX1A	ROBO2	-26961952	26961952	10850.6	99645467870926
152796	NFYB	HIGD1A	2696011	2696011	20.1817	126950423543
217067	KLF15	MT3	26954265	26954265	116958	893197108449928
261775	PKNOX2	PDX1	-2694846	2694846	1206.19	109185839737626
167073	NR3C2	IGFBP2	-26931873	26931873	132.006	118794054817542
290310	HLF	RBFOX1	26929168	26929168	7.83662e-05	18105871163333
352485	RORA	TAGLN3	-26920555	26920555	0.0122381	159122876899568
178292	KLF13	KCND2	26918238	26918238	0.00113259	169459271076122
306121	FOXA2	SCG2	-26906407	26906407	189439	872253109751609
13269	HSF1	ANXA10	26900364	26900364	0.0204601	156890919444509
198623	ELF1	LSAMP	-26896669	26896669	661.489	111794776449067
329408	TFCP2L1	SLC7A8	26891863	26891863	0.848176	140715138274521
296466	NR1H4	RGS4	26886517	26886517	1791.96	10746670599447
282161	NR2C2	PTGER3	26885418	26885418	62.3878	122049002948307
319130	KLF6	SKAP1	26881455	26881455	6.25431	13203820560738
329373	SOX5	SLC7A8	-26871141	26871141	1750.19	107569142692032
65542	HES1	CPE	-26867373	26867373	1.34479e+07	687134667923993
137817	EGR1	GPR137B	26863512	26863512	87533	805782794956271
328999	CDX2	SLC7A2	-26854686	26854686	12.2271	129126782569082
306117	FOXO4	SCG2	-26848823	26848823	263611	857903633505652
333780	SMAD9	SNAP25	26843708	26843708	0.000383597	174161243210223
346162	ELF3	ST3GAL6	-26834277	26834277	1071.61	109699627138265
329039	ARX	SLC7A2	26812613	26812613	3.44928	134622710333485
208999	HOXB2	MEIS2	-26810883	26810883	0.0224302	146491660481627
137877	E2F2	GPR137B	-26809888	26809888	1.3471e+06	787059958285587
180381	NR3C1	KCNK16	26791515	26791515	20.5432	126873315510802
132590	NR4A2	GHSR	26787374	26787374	331.188	11479924901476
291019	RORC	RBP2	-26786316	26786316	420.634	113760959038646
329438	RORC	SLC7A8	-26781367	26781367	273.313	115633401605622
261747	NEUROG3	PDX1	-26776876	26776876	0.141593	148489585868173
306815	SOX3	SCGN	-26768845	26768845	73100.4	913608035019702
268748	EGR2	PLAGL1	-26764851	26764851	207.355	116832854519447
228685	JDP2	NFE2	26715651	26715651	5.90897	132284879923335
258417	E2F8	PCLAF	26697349	26697349	1.13347e+07	694558843353468
155400	HSF1	HMGN3	26696023	26696023	0.278287	145555071735752
100266	SP1	ELP4	-26692377	26692377	0.684595	141645664102015
126037	SREBF2	G6PC2	26692338	26692338	21578.3	966598344250487
306213	SMAD9	SCG3	26675351	26675351	906.631	110425692178013
39190	PKNOX2	CALML4	-26673412	26673412	78.4931	121051687932246
306770	IRX3	SCGN	-26659753	26659753	1.20231e+07	691998236509266
100457	EGR2	EMB	-26657518	26657518	1.05626e+06	797623021282435
55376	ELF5	CHGA	-26655788	26655788	2721.56	105651827239156
65486	ESRRG	CPB2	-26654694	26654694	196.27	117071455917279
189968	FOXN3	KRT7	26654532	26654532	15631.3	980600527818046
103196	FOXN3	ERO1B	-26645454	26645454	1.16557e+06	693346308870916
25145	ELF4	B2M	2663612	2663612	0.642644	14192029267949
306881	GATA3	SCGN	-2662443	2662443	15060.5	982216196136597
259575	BCL11B	PCSK1N	-2661765	2661765	9.30678	130312007834076
283490	PLAGL1	PTPRN2	26613623	26613623	2.58869	115869203066791
21229	NR1H4	ASNS	26603863	26603863	0.00292445	165339553064045
55824	FOXN3	CHIA	-2659156	2659156	53407.1	927240074112464
369592	NFIB	TM4SF4	26583279	26583279	22.7173	11643643844373
39107	RFX6	CALML4	-26580445	26580445	0.103388	149855306726299
167174	EGR1	IGFBP5	26573388	26573388	0.35574	134488671925123
155411	RORC	HMGN3	26525375	26525375	3.39496	134691648427857
155333	MEF2B	HMGN3	26523609	26523609	3404.42	104679573304422
369513	MEF2A	TM4SF4	26521847	26521847	0.0312843	155046741276182
3048	ETS1	ACVR1C	-26520371	26520371	46922.1	932862266143392
327087	EGR3	SLC3A2	-2651734	2651734	1.58712e+09	479938985833742
370442	STAT1	TMEM176A	2650551	2650551	22.539	116470649480699
13317	RORA	ANXA10	-26498377	26498377	6.81184	131667356458386
206913	TFDP1	MDK	26486235	26486235	93164.6	903074892351067
180422	RFX2	KCNK16	26434267	26434267	0.00326615	164859638718865
65550	ETV2	CPE	26429947	26429947	27.8321	125554545860589
103133	ZNF281	ERO1B	-2642471	2642471	6390.91	919443700880412
37229	MZF1	CACNA2D1	26419384	26419384	53.0164	112755893745881
380894	TFCP2L1	UPK3A	-2641416	2641416	5.04479	122971571184666
122319	ELF2	FOXO1	26409166	26409166	0.525936	142790670869395
174269	LIN28B	ISL1	26405426	26405426	17.1088	127667797647742
348878	NR4A2	STMN3	26403494	26403494	1270.75	108959403511318
55496	REST	CHGB	-26402947	26402947	2.16344e+06	766485493871354
177223	ELF2	JUNB	26402092	26402092	301.695	115204318067318
259053	CREM	PCSK1	26393589	26393589	0.000867711	170616248940164
198606	TFDP2	LSAMP	26388768	26388768	791.896	111013320533142
306927	SMAD5	SCIN	-2638701	2638701	4.79072	133195993362786
210639	ELF1	MFAP4	-26382586	26382586	312.607	115050014298733
328950	E2F1	SLC7A2	-26376998	26376998	0.18533	147320538066629
276316	ETV3	PPP1R1A	26359966	26359966	635.97	11196563531965
382817	HNF4A	VCAN	26340391	26340391	0.00806762	160932546805579
65215	RORA	COX4I2	-2631845	2631845	0.877961	140565245338092
192613	RORC	LGALS2	26317123	26317123	2186.87	106601766950176
100332	CREB5	ELP4	-26316004	26316004	113.329	119456582586518
167077	EGR2	IGFBP2	26311489	26311489	347.005	114596638378569
59910	EGR1	CLU	26310718	26310718	15.2599	128164473396187
333809	BBX	SNAP25	26310699	26310699	0.00246978	166073411973098
377434	RORC	TUBA4A	263103	263103	12189.3	991402027883749
369765	E2F4	TMED3	26294911	26294911	8.20728	130858006765122
13584	CREB3L1	ANXA2	26288975	26288975	14982.4	982441984528547
262280	KLF6	PEG10	26287256	26287256	1.45059e+07	683845530243704
146096	LMX1A	H2AC21	2628489	2628489	2418.12	106165227705195
180387	NR3C2	KCNK16	-2627971	2627971	17.9369	127462527856145
378041	TCFL5	TXNIP	-26274981	26274981	4.65415e+07	633215995242624
299506	TFDP2	RORA	-262576	262576	0.00173566	167605361615074
284838	SMAD9	QPCT	2625646	2625646	0.0483953	153151966232879
306552	ETV4	SCG5	-26253767	26253767	0.140435	148525256246371
348818	ZNF467	STMN3	-26241811	26241811	24857.7	960453838653062
395320	TCF4	ZEB1	26241224	26241224	1.23067	139098567849873
74794	TFDP2	DACH1	26234984	26234984	25362.3	959581220332669
306512	SPI1	SCG5	26232485	26232485	31700.7	949893138823117
143490	HOXB2	GSTM3	26222024	26222024	97.0828	120128575685069
13547	EOMES	ANXA2	-26207065	26207065	1.91679e+07	671742634105561
369851	RORA	TMED3	-2620052	2620052	191.932	11716852143915
262206	ZNF783	PEG10	-2619768	2619768	4.64251	133332471849464
380914	ZNF184	UPK3A	-26178535	26178535	28.7131	125419191629617
327054	POGK	SLC3A2	26176356	26176356	40124.3	939659227163377
74714	TFDP1	DACH1	-26166076	26166076	598.377	112230252793041
306540	DLX2	SCG5	-261587	261587	66572.3	917670661652933
209036	TFEB	MEIS2	26156541	26156541	8.83697e+06	705369641610125
103131	TCF12	ERO1B	26129387	26129387	43475.1	9361759643272
101704	KLF11	ENPP2	-26127186	26127186	0.298652	145248347564416
135031	MAF	GLS	26124375	26124375	0.00450778	163460373378626
25150	ZNF566	B2M	26123757	26123757	0.035853	154454741273142
228665	NFE2L2	NFE2	2612211	2612211	0.00260834	165836365835192
100486	PPARA	EMB	2611672	2611672	1796.98	107454557453235
309683	SMAD9	SELENOM	-26112685	26112685	103899	898339018630404
222834	PLAGL1	NAGS	26110906	26110906	0.0245679	156096326403767
174215	NR1H4	ISL1	26107913	26107913	70.8757	121495023412186
370508	HSF1	TMEM176A	2610458	2610458	100.837	119963793400053
88848	ATF4	DUSP1	2608749	2608749	2087.14	106804493681016
346059	TFDP1	ST3GAL6	260753	260753	263.9	105785612348253
100268	SP3	ELP4	26072927	26072927	3789.21	104214508370668
137836	FOS	GPR137B	26056675	26056675	11199.2	995081175045384
217157	PPARA	MT3	-26045084	26045084	1.57625e+07	680237386623077
268767	KDM2B	PLAGL1	-26039131	26039131	0.411761	143853552979819
139695	GATA6	GPX3	-26026309	26026309	6.31716	121994778155566
276283	ZNF467	PPP1R1A	-26017815	26017815	666889	817594622569587
137802	KLF11	GPR137B	-26014348	26014348	2.66072e+06	757500024448698
13680	CREB3	ANXA2	-25987513	25987513	1.57719e+08	58021171881886
377809	DBP	TUSC3	-25977673	25977673	94.6727	12023775270925
101893	ELF3	ENPP2	-2597047	2597047	9433.14	100253438755079
302322	TFDP2	RUNX1T1	-25966985	25966985	3.48528e-06	1945776197233
328920	NR1H4	SLC7A2	25958072	25958072	219.628	116583119065613
259542	ELF1	PCSK1N	-25955504	25955504	630.323	112004367922282
244610	HLF	NRXN1	25951618	25951618	0.0677324	15169203704157
25087	ZNF467	B2M	-2595143	2595143	3336.51	104767072876908
152687	ZNF383	HIGD1A	25948396	25948396	3883.56	10410769732248
55326	MYPOP	CHGA	2594731	2594731	148.28	118289168811487
3019	PAX6	ACVR1C	-25947072	25947072	2735.85	105629084901123
54125	FEV	CFAP61	25944266	25944266	0.948557	140229367759185
306874	GATA5	SCGN	25939686	25939686	3.61079e+06	744239755215068
9496	ETV2	ALDOB	25930483	25930483	73.8728	111315154009871
103127	HNF4A	ERO1B	25909854	25909854	180898	874256671014363
9470	HNF1A	ALDOB	25904458	25904458	2.58855e+06	758694292451242
13533	NR2C2	ANXA2	25898661	25898661	981287	800820408486093
174289	CREB3L4	ISL1	25887165	25887165	3807.21	104193933864192
380881	ZNF322	UPK3A	2586961	2586961	11128	995358300551655
268754	ELF1	PLAGL1	-25865993	25865993	0.585422	142325310989298
103066	SMAD9	ERO1B	2586509	2586509	57279.1	924200379836884
37151	ETS1	CACNA2D1	2584991	2584991	621.287	102067076158536
290968	MLX	RBP2	25847727	25847727	0.00632975	151986133826035
103129	TGIF1	ERO1B	25843635	25843635	0.431284	143652369498598
227311	ETV5	NEUROG3	258419	258419	526706	827843185406079
286121	MEIS2	RAB3C	-25836824	25836824	0.0125976	158997120558712
38432	KLF7	CALB1	-25824498	25824498	0.687704	141625984645851
206994	USF1	MDK	25820564	25820564	193547	871321308695915
9562	LMX1A	ALDOB	-25810553	25810553	5.76192e+06	723943301167293
139624	RFX3	GPX3	-25804052	25804052	9.80768e+08	500843378291644
377293	RORB	TTR	25798185	25798185	784470	810542365735347
198601	BATF3	LSAMP	-25792418	25792418	0.0094146	160261983484001
72587	SMAD9	CXCL12	25792196	25792196	0.0825264	15083407357818
75755	PLAGL1	DCLK1	25781605	25781605	1.42034e-09	228476067154286
306826	TGIF1	SCGN	25772542	25772542	1.35015e+06	786961722184774
89653	DNMT1	DUT	25771396	25771396	22921.4	963975813202946
268751	RORC	PLAGL1	-25769895	25769895	0.214409	146687571395139
47494	HNF4A	CDA	-25764078	25764078	33.2022	1247883350973
25077	MYCN	B2M	25744451	25744451	40274.6	939496823524338
103112	ETV2	ERO1B	25741585	25741585	152852	881572808572427
202434	FEV	MAP2	25740733	25740733	0.252569	145976201772348
13535	MEF2D	ANXA2	-2573352	2573352	1.2623e+06	789883853889462
100468	GATA6	EMB	-25703438	25703438	3.45337	13461756959834
100382	EGR3	EMB	-25688203	25688203	41553.9	938138857735793
192588	E2F5	LGALS2	-25682967	25682967	1.79572	137457620626613
142695	IRF7	GSDMD	25679065	25679065	0.000501596	172996455105029
49026	NR1H4	CDH17	25666954	25666954	0.00458694	163384768627251
13540	CDX1	ANXA2	-25661372	25661372	3.41237e+07	646694433369331
276355	RARG	PPP1R1A	-25634995	25634995	0.366848	144355134295762
329464	KLF6	SLC7A8	25630739	25630739	100820	899645484201128
55663	NR4A2	CHGB	25623662	25623662	9.60147e+08	50176621608264
20417	TFDP2	ASCL2	2560531	2560531	4.56528e-06	183405326136567
325637	TFDP1	SLC37A4	25603682	25603682	0.79016	141022851159011
74807	ESRRB	DACH1	25580557	25580557	28.1699	125502148797873
377327	MEIS3	TTR	25572984	25572984	2.67915e+09	457200353492617
306516	USF1	SCG5	25572486	25572486	474.623	103236509635221
70071	KLF7	CRYBA2	2555756	2555756	1316.71	108805084434891
218521	HNF4A	MTSS1	2555398	2555398	0.265181	1457645685189
13673	NHLH1	ANXA2	2555141	2555141	8.14989e+07	608884810094541
282813	RORC	PTN	25543336	25543336	14.9157	128263562219864
306351	CREB3	SCG3	25537174	25537174	0.00347998	154584233903023
235769	BHLHE41	NME2	25534498	25534498	2618.11	105820125658945
76938	CDC5L	DDAH1	25531333	25531333	851.544	110697926522554
37119	EGR3	CACNA2D1	25522295	25522295	53531.3	927139192421097
72128	THRA	CTSZ	-25506118	25506118	0.0648981	151877678414728
72118	RORC	CTSZ	-2547859	2547859	29.2624	125336895364659
261811	MEIS3	PDX1	254761	254761	11.4964	129394374253008
319132	NR3C1	SKAP1	25472855	25472855	0.225618	136466256382802
100212	ZNF704	ELP4	25460435	25460435	271.56	105661345628836
88888	ETS1	DUSP1	-2545862	2545862	25.565	125923542550059
306965	TFDP2	SCIN	25450215	25450215	12140.8	99157528661585
306560	NR2F2	SCG5	-25447916	25447916	716.142	111450009024525
88806	KLF4	DUSP1	25447117	25447117	9.06331	130427131126661
328857	TFDP1	SLC7A2	25429718	25429718	1204.14	109193234843062
47429	ASCL2	CDA	-25417764	25417764	45391.1	934302892091263
214541	ELF1	MPP3	-25417613	25417613	2.13956	136696751371065
327091	ZBTB33	SLC3A2	25410924	25410924	198.932	117012947853768
55419	RXRB	CHGA	25402885	25402885	5650.01	102479508158033
262251	ELF4	PEG10	253917	253917	35023.5	945563995154368
377701	TFDP1	TUSC3	25391128	25391128	3957.77	104025494768189
55488	NR1H2	CHGB	25382653	25382653	2.98231e+08	552544768253056
259433	KLF15	PCSK1N	-25356095	25356095	4.55105	133418884699551
306592	HOXD3	SCG5	-25352797	25352797	12936	988820146267932
226064	ASCL2	NEUROD1	25347343	25347343	0.0376592	144241285701935
55787	NEUROG3	CHIA	-25344776	25344776	17720.4	975152581881555
126124	AR	G6PC2	-25340345	25340345	2.57996e+06	758838702353049
126129	ELK4	G6PC2	-25337549	25337549	21242.8	967278816241812
32633	ETV5	BTBD17	2533535	2533535	1.34604	138709415774544
126043	ALX3	G6PC2	-2533197	2533197	2.57993e+06	758839199307792
372900	KLF4	TOX	-25331533	25331533	0.000547834	172613509492788
324114	PLAGL1	SLC2A4RG	25324544	25324544	0.0258953	155867792330634
100308	ETS2	ELP4	-25317246	25317246	12.4004	12906565230163
306589	CREB3L4	SCG5	-25310835	25310835	36.394	124389707830278
79458	ASCL2	DIRAS3	25305845	25305845	4.34324e+07	636218607266887
93175	CTCF	EDIL3	25297645	25297645	0.00372503	154288696809626
290917	EGR3	RBP2	-25294319	25294319	41.5045	123819047939314
285459	E2F5	RAB26	25293922	25293922	1.16955	139319827366989
100294	NR2F2	ELP4	-25291588	25291588	4.20433	133763029853685
285498	KLF5	RAB26	-25289172	25289172	17138.8	976601872774038
134935	KLF11	GLS	25289131	25289131	0.141617	148488853623916
87397	THRB	DPP10	25288971	25288971	0.00707022	16150566923105
252170	RORC	P2RY14	25288047	25288047	7503.34	101247455961663
267731	NR4A2	PKLR	25278715	25278715	153.777	1181310737557
369700	NFKB1	TM4SF5	-25276046	25276046	620.819	112070349145061
65392	ASCL2	CPB2	25271947	25271947	4.53749e+09	434318422644321
334570	TFDP2	SNCB	25269778	25269778	0.00574537	162406820528791
149955	CREB3	HEPACAM2	25268346	25268346	66.7267	121757005396549
126016	MECOM	G6PC2	-2526622	2526622	644.161	111910057848929
285384	PLAGL1	RAB26	-25264448	25264448	1568.63	108044799574751
61072	BBX	CNTN1	25264254	25264254	0.000322614	174913164847388
210530	BCL11A	MFAP4	-25262756	25262756	0.778418	141087868600665
348758	NR1H2	STMN3	25260836	25260836	0.00292807	165334179683863
25127	NKX1-1	B2M	25260622	25260622	3.96491	134017664634901
369692	RORC	TM4SF5	-25259083	25259083	5803.78	102362891062875
57180	PDX1	CHST9	25247833	25247833	0.0680596	151671109252833
211539	ETV1	MGST1	25246408	25246408	0.000119809	179215092475043
38445	GTF3A	CALB1	25244128	25244128	0.0815011	15088836304038
38382	TGIF1	CALB1	25241481	25241481	0.12633	138984939541816
126059	NFATC3	G6PC2	-25233343	25233343	3.2488e+06	7488276557026
276218	ZBTB37	PPP1R1A	-25230074	25230074	4555.97	103414192929058
79584	NFIL3	DIRAS3	2521556	2521556	4864.98	103129188870118
253203	HSF1	PAPPA2	25182424	25182424	1777.08	107502939833309
93225	NR2C1	EDIL3	25178103	25178103	0.000130239	17885260052989
100267	MAFK	ELP4	-25174374	25174374	22.7404	10643202351801
132633	E2F1	GINS1	25172923	25172923	6.88027e-08	211623944983938
126035	E2F4	G6PC2	-2516821	2516821	21889.5	965976319165231
198571	RFX5	LSAMP	-25158541	25158541	103105	898671989981616
369834	ZNF250	TMED3	25149014	25149014	72231.7	914127236373028
346104	MBD2	ST3GAL6	25145255	25145255	0.560205	142516530064468
217079	MAZ	MT3	-25143491	25143491	10885.9	996313579064254
9572	RELA	ALDOB	-25126299	25126299	2.33671e+06	663139599354916
306897	PLAGL2	SCIN	25126085	25126085	0.0121089	149168967380377
327058	GSC2	SLC3A2	25117517	25117517	4.42227e+06	735435458022614
334582	CREB3	SNCB	25115693	25115693	0.0171089	157667768139627
3111	KLF10	ACVR1C	2511503	2511503	861.698	110646446862738
390620	BBX	ZBTB20	25101954	25101954	4762.62	103221541223408
306069	ATF4	SCG2	25082206	25082206	3.63323e+08	543970717078986
152739	E2F1	HIGD1A	-25073102	25073102	1.19506e+06	792260999480786
9629	RARG	ALDOB	-25070045	25070045	5376.47	102695024133941
65618	KLF6	CPE	25067873	25067873	3706.53	10431032439285
182268	TCF12	KIAA0408	25067225	25067225	0.000145013	178385923708601
25138	TFDP2	B2M	-25067057	25067057	177234	875145370398428
377734	NR2F6	TUSC3	-25066305	25066305	0.128069	148925564392541
135190	ETV1	GLS	2505961	2505961	9.06538e-05	180426141626955
378031	NFYA	TXNIP	-25057299	25057299	1.5095e+06	682116822829836
380947	SNAI1	UPK3A	-25051394	25051394	1.87107e+06	772791054199233
59974	TGIF1	CLU	25045842	25045842	2.14226e-06	196691273768959
89648	E2F8	DUT	25038479	25038479	9.84751e+08	500667366257019
259677	MAZ	PCSK2	25034046	25034046	9.06211	130427709068756
276257	ZBTB7A	PPP1R1A	-25025716	25025716	596301	822453465154197
206496	E2F1	MCM4	25023537	25023537	3.40468e-05	184679238582627
139646	MECP2	GPX3	25009913	25009913	161542	879171463902961
137881	LIN28B	GPR137B	25004538	25004538	5.08049e+06	729409478843588
101863	NR3C2	ENPP2	24993345	24993345	2.12258	136731360053509
390608	ZBTB7A	ZBTB20	24991626	24991626	26.994	125687331831744
13522	NFATC2	ANXA2	-24975734	24975734	104281	898179673022009
369639	RFX3	TM4SF5	-2496842	2496842	43.8888	123576463543971
309709	E2F1	SELENOM	2496025	2496025	3616.33	104417321656895
65525	XBP1	CPE	24956873	24956873	437546	835897674816109
25126	IRF3	B2M	24947504	24947504	1685.75	107732069913561
117336	ETV1	FOS	-24946233	24946233	298.016	115257599985435
296282	ASCL2	RGS2	24942935	24942935	0.00257514	165891984914843
38422	ELF4	CALB1	24940304	24940304	0.00199351	167003819311239
103850	PKNOX2	ESM1	-24938535	24938535	67.0138	121738359845507
152790	RXRB	HIGD1A	249332	249332	1619.82	979053254047783
382890	RORC	VCAN	24933081	24933081	1.50659e-05	188220058197554
309734	ETV4	SELENOM	24927562	24927562	367979	843417726644533
13748	TFDP1	ANXA4	2492604	2492604	1.7503	137568882325883
38010	FOXP1	CADM2	-24906648	24906648	10.6401	129730551718771
306974	NR3C2	SCIN	-24905242	24905242	0.270497	145678369890228
209051	ZNF169	MEIS2	24897708	24897708	188.875	117238251101559
368426	E2F2	TK1	24896214	24896214	78.6746	121041656654871
3013	EGR1	ACVR1C	-24894623	24894623	1101.45	109580369763024
206914	ZNF740	MDK	2488059	2488059	549040	826039622726132
55365	FOXJ2	CHGA	248797	248797	865520	806272282282208
276310	KLF12	PPP1R1A	-24877854	24877854	1.86662e+06	772894471730623
9571	ETV4	ALDOB	-2486111	2486111	897.262	11047080730887
255268	CDC5L	PAX6	24858417	24858417	6.94248	131584853362481
348852	NR2F2	STMN3	-24856174	24856174	0.145397	148374448619677
55691	CTCFL	CHGB	24855062	24855062	47.8612	123200168520388
192636	NR4A2	LGALS2	24853097	24853097	151.413	118198356401936
167080	ETV1	IGFBP2	24836628	24836628	1236.29	990787963377336
225540	ZNF385D	NEGR1	-2482538	2482538	0.0469167	153286720946229
218047	TFDP1	MTMR7	24822365	24822365	0.000967486	16014355302817
259601	ETV1	PCSK1N	-24820207	24820207	28.403	125466362946884
259364	TCF7L2	PCSK1N	-24808304	24808304	118.837	119250485290772
47428	XPA	CDA	24785807	24785807	1.14872	129397850640607
122385	ZNF385D	FOXO1	2476981	2476981	0.000334025	174762203902771
379661	HSF1	UCHL1	2476521	2476521	40.1926	123958539496073
348793	E2F4	STMN3	24762684	24762684	0.128422	14891359750357
290876	POU3F1	RBP2	-247545	247545	15.9291	127978099430312
198644	PPARA	LSAMP	2475417	2475417	43498.8	936152297322579
291010	HSF1	RBP2	24752736	24752736	46087.7	93364151429565
217116	SOX11	MT3	-24752053	24752053	35.4769	124500542911569
283103	FEV	PTPRD	-24738664	24738664	817.55	110874856172857
55703	BHLHE40	CHIA	24737481	24737481	253446	859611418824083
3012	NR1H4	ACVR1C	2472756	2472756	1520.51	108180104876449
112600	SOX5	FEV	24724515	24724515	0.5464	132624897028155
93135	MAFG	EDIL3	24719408	24719408	0.0299688	155233313143118
380896	CDX4	UPK3A	-24719035	24719035	10807.7	996626842988774
376539	NKX6-1	TSHZ1	24703896	24703896	0.00581828	162352056291948
75717	NR4A2	DCDC2	2470123	2470123	0.00141891	168480453850141
296476	BBX	RGS4	-24693737	24693737	23655.2	962607418667669
281137	E2F1	PRTFDC1	24692893	24692893	4.64706e-05	183328214218687
218555	TFDP2	MTSS1	2469128	2469128	6.39094	131944354516527
262890	MEIS2	PEX5L	24687964	24687964	1.01193	139948478882731
9525	TCF4	ALDOB	24683516	24683516	33509.3	947483448038487
356167	E2F1	TCF19	24672188	24672188	0.000209359	176791081523399
387125	NFYC	XBP1	24671605	24671605	2088.04	106802617736819
377251	CDX1	TTR	-24669342	24669342	161405829168698	37920807847931
55816	TEAD1	CHIA	24668302	24668302	521202	828299351412942
152679	KLF4	HIGD1A	-24661258	24661258	2.49157	136035267046855
259595	MZF1	PCSK1N	24660952	24660952	306.632	115133820127397
207050	ELF1	MDK	24655636	24655636	20508.5	968806587686501
57729	CXXC1	CITED1	24643755	24643755	11484	993990733700404
279076	ZNF467	PRNP	-2463556	2463556	0.000292705	175335701509105
149764	ASCL2	HEPACAM2	24620289	24620289	148.059	118295645847792
380946	RXRG	UPK3A	-24618175	24618175	2512.32	959992423969472
25103	SP1	B2M	-24617555	24617555	1.33999	138728978284625
13574	E2F4	ANXA2	-24601875	24601875	2.12963e+06	667169531018061
348841	FOXO4	STMN3	-2459932	2459932	0.663005	14178483066891
834	TFDP1	ABCC8	24593342	24593342	87.8427	120562943818951
174238	GATA4	ISL1	2459042	2459042	15173.2	881892330630158
382872	LIN28B	VCAN	2457332	2457332	0.0969705	150133605354065
309719	KLF9	SELENOM	-24564978	24564978	22050.2	865658681129937
138312	HEYL	GPR160	24564411	24564411	9.26372e-06	180332147858227
32566	KLF15	BTBD17	-24564054	24564054	1470.31	108325919691696
261655	HMX3	PDX1	-24543336	24543336	2.4127e+08	561749581340799
55538	EGR3	CHGB	24537357	24537357	2.74328e+09	456172932344511
285513	PAX4	RAB26	24537174	24537174	9541.26	100203942876566
328970	MAZ	SLC7A2	24528772	24528772	0.425309	143712953251704
377889	KLF10	TUSC3	24527987	24527987	31981.4	949510257206056
380865	FOXN2	UPK3A	-24516312	24516312	223.419	116508798912738
101814	KLF12	ENPP2	24510598	24510598	45.9708	123375176273991
135461	EGR2	GLUD1	24494136	24494136	231.484	116354792380292
209063	HEY1	MEIS2	24485812	24485812	484.176	11314996358082
137730	PDX1	GPR119	-24484357	24484357	0.000707615	171502031839394
259750	CREB3L4	PCSK2	-2448097	2448097	27.3068	125637299085972
13641	CDX4	ANXA2	24480697	24480697	1.03561e+06	798480467595231
207005	SP3	MDK	-24477907	24477907	109.201	119617720729354
299425	KLF10	ROBO2	-2447708	2447708	0.00572987	162418550225633
299375	NR3C1	ROBO2	24466773	24466773	212.965	11671692300649
79580	RARG	DIRAS3	-24462046	24462046	8.93959e+06	704868248978271
57682	NR4A3	CITED1	-24452597	24452597	22975.1	963874213687136
369892	MEIS3	TMED3	2444813	2444813	4605.71	103367038318606
262277	ZEB1	PEG10	24443105	24443105	129832	888661857891002
395393	RORA	ZEB1	24421727	24421727	0.0832964	150793737714887
65620	MEIS2	CPE	-24410421	24410421	3.28792e+07	648307810749286
149857	ONECUT2	HEPACAM2	2440989	2440989	469.558	113283108302116
79561	NFATC4	DIRAS3	-2439588	2439588	1427.49	108454260433825
262211	ETS1	PEG10	-24391737	24391737	14621.7	983500217136386
167037	ZBTB17	IGFBP2	24391364	24391364	421.718	113749775138764
306124	IRF3	SCG2	24378432	24378432	38046.5	941968520527187
276292	FOXK2	PPP1R1A	24377318	24377318	23229.3	963396349183805
259452	BACH1	PCSK1N	-24372363	24372363	16206.7	979030602708951
369586	ARX	TM4SF4	24371753	24371753	1838.3	107355843385395
3018	EGR3	ACVR1C	-2436783	2436783	49836.5	930245289163243
327066	NR2C2	SLC3A2	24366295	24366295	3306.07	10480688021131
228694	EGR1	NFE2	24356628	24356628	6.01591	132206987782041
329108	PAX4	SLC7A2	-2435251	2435251	25.1542	125993903378857
293629	PAX4	REV3L	2433862	2433862	208.488	116809186628333
55803	ELF1	CHIA	2433752	2433752	170396	876853990600651
65193	RORC	COX4I2	24336416	24336416	3558.41	104487437182235
291208	CDC5L	RBP7	2433126	2433126	0.40083	143970396187489
217046	EGR1	MT3	24324821	24324821	8.0592e+06	709370807885846
137807	E2F8	GPR137B	-24322497	24322497	9.52689e+06	702104873287735
352058	TFDP2	TAC1	24311922	24311922	0.00114654	169406092357302
167015	ZNF304	IGFBP2	24308652	24308652	117.056	109316057114423
261754	MXD1	PDX1	-24307048	24307048	0.745022	141278311601264
13743	E2F6	ANXA2	-24304906	24304906	1.37822e+06	78606811274189
377520	HES6	TUBB2B	24304625	24304625	0.124831	149036764052524
380893	SP3	UPK3A	24304606	24304606	2.09258e+08	567931862818892
209109	NR2F1	MEIS2	-24268666	24268666	13.3346	128750196074372
327101	ZNF467	SLC3A2	-2426517	2426517	495756	83047323729955
100208	TCF7L2	ELP4	-24256771	24256771	0.151395	148198885407245
209048	HEYL	MEIS2	-24253974	24253974	4507.25	103460883581336
351574	ELF1	SYT4	-24250362	24250362	263.133	115798243226902
20188	NR4A3	ASB9	-2423463	2423463	13874.5	98577818232556
178215	SMAD3	KCND2	24230063	24230063	8.5955e+06	70657290038495
262221	DMBX1	PEG10	24225937	24225937	0.0715055	151456604426517
55785	RFX1	CHIA	-24208743	24208743	518822	828498196519303
244673	TFDP2	NRXN1	-24206871	24206871	0.0049993	163010907306673
327151	FOXN3	SLC3A2	-24206214	24206214	91371.5	903918901719848
329386	CREB3L1	SLC7A8	24202503	24202503	24.3594	126133332247637
285327	CREB3	QSOX1	24194194	24194194	0.00232665	166332698433614
79497	E2F4	DIRAS3	24190467	24190467	7776.03	10109242170917
268704	NFE2	PLAGL1	2418929	2418929	0.0403174	143945070767015
55758	GATA4	CHIA	24186386	24186386	951708	80214964812315
25132	RELA	B2M	24182541	24182541	152.18	118176416266346
55809	ZNF385D	CHIA	24174476	24174476	1.35786e+06	786714585691966
306803	FOXI3	SCGN	-24164924	24164924	1235.69	109080900555822
302226	SOX5	RUNX1T1	24157858	24157858	6.00494	132214915473084
262263	ELF3	PEG10	24136964	24136964	10531.7	997750090907478
333835	ZNF250	SNAP25	24134582	24134582	4.34952	133615588291465
37133	KLF15	CACNA2D1	24133377	24133377	81.5512	120885698749496
306858	RORC	SCGN	2411583	2411583	1.15906e+08	593589544338814
306044	ZNF274	SCG2	-24109827	24109827	3837.53	104159480768528
38453	FOXN3	CALB1	-24106843	24106843	225.063	116476952321017
138226	SMAD9	GPR160	2410457	2410457	0.0251706	155991062124476
39355	TGIF1	CALY	2408985	2408985	0.00017193	177646473489376
100454	KLF3	EMB	24089746	24089746	101408	899392992159773
79529	SRF	DIRAS3	24082946	24082946	2.19084e+06	765939020851899
378060	ETV5	TXNIP	24080943	24080943	372239	842917758032343
3031	ELF2	ACVR1C	24076395	24076395	63712.3	919577686378616
276265	THRB	PPP1R1A	24062566	24062566	2.45954e+07	660914595736931
306861	PROX1	SCGN	24062557	24062557	255395112832844	359278741752693
418552	CTCF	ZNF428	2405464	2405464	0.0583864	152336882515955
225378	SMAD9	NEGR1	24040513	24040513	0.0611738	152134346960295
237382	ZNF467	NOVA1	-2403953	2403953	1.68642e-05	187730335790324
167009	PAX6	IGFBP2	24012338	24012338	402.467	113952700281548
25068	ZBTB33	B2M	24006836	24006836	312.013	115058273402225
202100	ELF2	MAP1B	2400669	2400669	0.00877214	160568943159308
55644	ZFP1	CHGB	24005506	24005506	2.02301e+07	569400258815025
10865	TFDP2	AMIGO2	2399976	2399976	7.52017e-05	181237723265389
9644	TCF21	ALDOB	23999302	23999302	12624.8	989877392050682
38330	HOXA5	CALB1	-2399359	2399359	14016.6	985335663256717
255186	MEIS2	PAX6	23976525	23976525	7.76204e-06	18110023989378
137884	ZNF283	GPR137B	2396884	2396884	17675.3	975263305990849
167083	NFKB1	IGFBP2	-23963254	23963254	18002.9	974465871724257
13544	MEF2B	ANXA2	-23960909	23960909	727714	813803939023313
65204	KDM2B	COX4I2	23941092	23941092	15.7622	128023818112291
207038	NR3C2	MDK	-23932049	23932049	1.26446e+07	689809429746019
178243	EGR3	KCND2	-23931017	23931017	1.49284	138259862852694
208984	E2F3	MEIS2	23927823	23927823	13.7087	128630041371588
150002	FOSB	HEPACAM2	-23927558	23927558	1.30491e-05	188844208966977
377280	NFE2	TTR	-23917569	23917569	173230543895403	376137553105009
299268	CREB3L2	ROBO2	23917278	23917278	0.936018	140287159719704
172418	CREB3	IRF7	2391546	2391546	1.94744e-07	197105358611015
291242	KLF10	RBP7	23915326	23915326	8.09083	130920071018896
346099	E2F1	ST3GAL6	-239013	239013	34.946	124566027986796
208957	ZBTB7A	MEIS2	2389754	2389754	7.68689	131142490809512
117309	NR2C1	FOS	-23887673	23887673	6807.18	10167032647106
964	ELF1	ABCC8	-23881523	23881523	4.0188	133959037999207
172276	PLAGL1	IRF7	23878535	23878535	0.301919	145201094677289
302346	FOXP1	RUNX1T1	23871591	23871591	29786	952598747426793
227350	MEIS2	NEUROG3	-23870718	23870718	602341	822015721743083
207074	PAX4	MDK	23868179	23868179	86320.6	906388532036011
103126	KLF9	ERO1B	23860779	23860779	0.102026	149912874000714
9620	HOXD3	ALDOB	-2385518	2385518	1256.29	109009117136615
154745	E2F7	HMGB2	238474	238474	1.83783e+06	773569536843182
65143	SMAD5	COX4I2	23842392	23842392	1.39255	138561882567315
192591	NKX1-1	LGALS2	23840016	23840016	127.489	118945288568358
143576	KLF5	GSTM3	-23838842	23838842	0.00744397	161281954675422
132731	E2F1	GINS2	23835361	23835361	9.27738e-05	180325744747598
13589	E2F7	ANXA2	23831481	23831481	1.10938e+09	495492077200204
21940	E2F1	ATAD2	2381319	2381319	0.905467	140431273915724
3021	SMAD5	ACVR1C	-23811113	23811113	10.0656	129971613722121
151818	ETV5	HHEX	2380978	2380978	15129.6	982017263310005
32562	RFX6	BTBD17	-23802906	23802906	467.04	11330645978439
283532	FOXO1	PTPRN2	23802701	23802701	11.214	129502384575223
263002	PLAGL1	PFKFB2	23794955	23794955	0.00372457	16428923766291
13197	HNF1A	ANXA10	23782171	23782171	0.00532885	162733668786503
13596	NRF1	ANXA2	-2377742	2377742	912611	603971440024007
217053	EGR3	MT3	23765538	23765538	5.89706e+08	52293644361931
258866	RORA	PCNA	-23761978	23761978	0.335891	144738020914454
237483	KLF10	NOVA1	23761488	23761488	0.0165956	157800079211518
65459	HSF1	CPB2	23754887	23754887	1.53909e+06	781273655126835
132573	RORC	GHSR	-23753526	23753526	1492.81	10825994465786
351565	ELF4	SYT4	23752073	23752073	8.19379e-05	180865152018771
306171	LHX5	SCG2	2375012	2375012	18.2728	127381943508586
306970	NR3C1	SCIN	23749175	23749175	216.765	106640106794058
137739	ARX	GPR119	2373307	2373307	10.0488	129978875888232
105815	NR1H4	ETV1	23726137	23726137	70.4626	12152041196529
205288	RORC	MBD3	23708187	23708187	0.00011231	179495813381235
262255	ELF1	PEG10	-23695573	23695573	6709.31	101733222069484
139607	MYBL2	GPX3	-23685966	23685966	1.52355e+06	781714223724099
278394	TFDP2	PREB	23683906	23683906	0.000427013	17369558436875
174316	KLF6	ISL1	23680396	23680396	8300.77	100808817492705
55777	ATF6	CHIA	23674833	23674833	0.00519547	162843752764964
103051	PLAGL2	ERO1B	23671495	23671495	1.04277	129818130040798
55678	MEIS3	CHGB	-23670869	23670869	4.57055e+09	434003133213373
329433	NR3C2	SLC7A8	2366543	2366543	123042	890994515718047
178227	ZNF704	KCND2	23659704	23659704	1.3309	138758540105319
25188	PPARA	B2M	-23658033	23658033	103.879	119834710208214
54313	ZEB1	CFAP61	23655562	23655562	0.0181407	147413458885071
60020	SOX11	CLU	-23643464	23643464	8.69319e+06	706082102355754
945	E2F2	ABCC8	-23643427	23643427	1.95736	137083297415409
306568	ELF4	SCG5	23634557	23634557	2.3404	136307099866579
253155	ZNF282	PAPPA2	-2362499	2362499	0.248735	146042625885844
105834	ISL1	ETV1	23624796	23624796	3.35396e+06	647444209246303
47542	ELF3	CDA	23615869	23615869	0.0238312	146228546676378
65121	SMAD9	COX4I2	-23615431	23615431	326.26	114864363746922
126056	BACH1	G6PC2	-23612984	23612984	99062.2	900409194811259
227312	NFIA	NEUROG3	23606688	23606688	4056.17	103918841998559
1003	ETV1	ABCC8	-23597352	23597352	0.00500462	163006290936213
55762	FOXK2	CHIA	-23595039	23595039	1.28636	138906379772387
369674	RFX1	TM4SF5	23593998	23593998	181.79	117404294841011
72058	ZNF467	CTSZ	235903	235903	768.567	111143180433926
126119	ELF1	G6PC2	23583679	23583679	3.17929e+08	549766994893883
59856	TFDP1	CLU	23583462	23583462	0.145506	148371192489461
192544	ETV2	LGALS2	23574721	23574721	259.609	115856802359989
352462	NR4A2	TAGLN3	2356041	2356041	0.137968	148602208837684
13611	MAZ	ANXA2	23557143	23557143	4.09131e+06	738813720065848
100314	NFKB1	ELP4	-23553519	23553519	39.5578	114027682156899
259431	NRF1	PCSK1N	-23549443	23549443	118.748	119253739937832
101361	ZBTB7A	ENO2	23549004	23549004	0.419138	143776431391853
55617	NFIX	CHGB	23546789	23546789	186286	872982043855293
351764	RORA	SYT7	23539815	23539815	81.6516	120880354316009
306032	DLX1	SCG2	23512594	23512594	926941	803294792032659
55664	CIC	CHGB	-23510734	23510734	7.50127e+08	512486530001757
178307	RFX1	KCND2	23502585	23502585	2.49341	136032066283253
37103	ATF1	CACNA2D1	-2349025	2349025	322.603	114913320575477
55746	BBX	CHIA	23476847	23476847	793060	810069402434938
112696	ISL1	FEV	-23470558	23470558	204674	76889375091549
152764	SP3	HIGD1A	23444284	23444284	3.5423	134507151845663
253100	NOBOX	PAPPA2	2343871	2343871	453.979	113429638673536
79574	ZNF385D	DIRAS3	-23428967	23428967	1.69764e+06	777015561224179
306789	ZBTB14	SCGN	23426266	23426266	160174	879540825029059
198590	KLF12	LSAMP	23423132	23423132	1978.48	97036682078184
377319	ATOH7	TTR	-2340052	2340052	6.78565e+08	516840855485482
103194	CIC	ERO1B	-23399413	23399413	5175	928608996538205
346165	GTF3A	ST3GAL6	23396047	23396047	6.47946	131884611647703
302366	FOXN3	RUNX1T1	23395907	23395907	0.175308	137561989509141
379551	E2F4	UCHL1	2339356	2339356	92.7033	120329046764445
79509	E2F1	DIRAS3	-2339317	2339317	1.24674e+06	790422382402799
958	RORC	ABCC8	-23386976	23386976	37.9063	124212880493178
210058	PLAGL1	MEST	2338545	2338545	0.0576386	152392867075776
167256	LMX1A	IGFBP5	23383439	23383439	92443.3	903412443931241
57708	MECP2	CITED1	23367256	23367256	6527.23	101852711932782
258850	NR4A2	PCNA	23352385	23352385	2.41839	136164736717034
192597	TFDP2	LGALS2	-23349183	23349183	256.419	11591050027338
13567	NR1H4	ANXA2	-23346609	23346609	2.69978e+07	656867142058321
387172	CDC5L	XBP1	2333983	2333983	58808.2	923056189478347
395304	ZNF467	ZEB1	-23338359	23338359	0.000640426	171935310060299
217039	GABPA	MT3	2333373	2333373	7.05421e+07	615155141658964
206921	NR1H2	MDK	2333204	2333204	551473	825847593719636
72006	KLF11	CTSZ	2332831	2332831	41.6186	123807123271115
380948	PPARA	UPK3A	-23313988	23313988	3.146e+06	750224126365825
55588	MNX1	CHGB	-23296528	23296528	2.04e+07	669036936181023
[truncated: 2 more rows]

## Sheet: Sheet2
Sheet2: Filtered GRN of pig Beta,1
ID	source	target	coef_mean	coef_abs	p	-logp
13578	PAX6	ANXA2	36091918	36091918	3.12309e-09	225054151870319
377284	CDX2	TTR	-3273138	3273138	0.09788	15009305930009
377291	NEUROG3	TTR	-3073036	3073036	7.88432	13103235942537
377334	MEIS2	TTR	-30174118	30174118	1.57305	138032577071852
55643	NFIA	CHGB	29939273	29939273	6200.45	102075769000888
117226	EGR1	FOS	27780625	27780625	58.0616	112361109036759
55412	NEUROG3	CHGA	2742226	2742226	222.034	116535813460152
55622	ARX	CHGB	-26831883	26831883	0.0016602	167798395805112
117337	JUNB	FOS	26524827	26524827	2731.24	956364005868309
55505	SOX5	CHGB	26466656	26466656	0.136462	148649880837728
306765	KLF4	SCGN	-2537729	2537729	3.81155e-06	194188982067012
55519	XBP1	CHGB	-24934658	24934658	15.5306	128088108520827
378079	NR4A2	TXNIP	24254356	24254356	2.36483	136261996638809
13744	ETV1	ANXA2	-2325197	2325197	0.0082099	160856623367076
13721	FOXN3	ANXA2	-22109413	22109413	0.0174526	157581406314858
137824	PAX6	GPR137B	22009648	22009648	3.69353	124325585543684
377247	SNAI2	TTR	-21180877	21180877	110727	895574606685263
55690	MEIS2	CHGB	-20926243	20926243	0.279549	145535423507795
377322	NR2F1	TTR	-20766793	20766793	1383.85	108589100105535
103094	PAX6	ERO1B	20729771	20729771	150.926	118212373304231
377243	TGIF2	TTR	-2027272	2027272	0.022299	156517152009927
177207	EGR1	JUNB	2023446	2023446	3.30195e-10	234812298507944
377306	RORC	TTR	-19832791	19832791	2.04568	126891629001162
13698	FOXP1	ANXA2	-19770126	19770126	3.87688	134115179350639
346091	PAX6	ST3GAL6	19268371	19268371	1.41507e-07	208492225811731
306814	RFX2	SCGN	190345	190345	0.000124488	179048710942376
79605	ETV1	DIRAS3	18197778	18197778	0.0564389	152484210903558
152843	ETV1	HIGD1A	-18019329	18019329	0.52726	14277974792003
57728	NEUROG3	CITED1	-17948002	17948002	0.000587494	172309968128851
57696	PAX6	CITED1	17896372	17896372	0.0422932	15373729301497
103178	ETV1	ERO1B	-17560941	17560941	2.27453	136431074854207
377257	ATF1	TTR	17263937	17263937	0.0652007	15185747733303
290922	THRB	RBP2	17040505	17040505	0.00464412	163330964743024
137918	ETV1	GPR137B	-16999948	16999948	138.53	108584555075531
377302	HSF1	TTR	16907181	16907181	58.7475	122310103481893
306786	SIX6	SCGN	1685091	1685091	0.00670996	161732797856855
151815	ETV1	HHEX	16806428	16806428	7.25153	131395705232832
103906	ETV1	ESM1	-16637987	16637987	0.0436549	153599672622447
378051	RORC	TXNIP	16294073	16294073	80.9447	120918114868297
103132	TCF4	ERO1B	16227998	16227998	0.000199274	177005490020846
13610	GATA4	ANXA2	-16087268	16087268	4.44778	13351857122857
282755	PAX6	PTN	15950552	15950552	48.8565	1231107721439
174297	NR4A2	ISL1	1593768	1593768	0.0156753	148047853451882
306180	ZEB1	SCG2	1581783	1581783	0.000986234	170060198192514
55631	PKNOX2	CHGB	-156275	156275	28.5339	125446381279362
377313	MITF	TTR	1551261	1551261	18946.6	972246886166837
55440	ATF3	CHGA	-15430315	15430315	577.603	112383708830503
65608	FOXN3	CPE	-15307121	15307121	1.90231e-06	187207189189036
55677	CREB5	CHGB	15189765	15189765	14.0476	128523992733066
103740	THRB	ESM1	15037087	15037087	4.55513e-08	203414994099449
70021	FOXO1	CRYBA2	14904699	14904699	0.0406838	153905784345528
103207	ZEB1	ERO1B	-14822608	14822608	0.967116	140145213144977
324768	PAX6	SLC30A8	14761022	14761022	241.027	11617933556492
306869	GATA6	SCGN	-14714782	14714782	5.62597	132498025284243
324739	SOX5	SLC30A8	-14667362	14667362	1.18875e-05	18924909267559
13742	RORA	ANXA2	14628859	14628859	26395.5	957846980251782
55570	HNF4A	CHGB	14624313	14624313	0.0369548	154323294627651
95885	FOS	EGR1	14602157	14602157	0.00143198	168440633207782
139703	NR4A2	GPX3	14374721	14374721	1.12038	139506328449627
103191	NR4A2	ERO1B	1427507	1427507	0.0217103	156633347337224
152727	PAX6	HIGD1A	14274721	14274721	0.0871075	150599445807737
306859	RORA	SCGN	14249635	14249635	28.2599	125488298531436
55720	NEUROD1	CHIA	1423097	1423097	28815.9	954036841299375
55452	FOSL2	CHGA	-14201246	14201246	3.94527	12403923583421
55714	SIX6	CHIA	13918947	13918947	9.57362e-05	180189237846702
324833	PDX1	SLC30A8	13851202	13851202	0.000222094	176534627144377
282854	ETV1	PTN	-13816735	13816735	476.515	11321923153744
369525	SOX5	TM4SF4	13788943	13788943	4.4231	133542728573862
207061	NR4A2	MDK	13753393	13753393	0.000473886	173243264822311
206924	PLAGL1	MDK	-1371327	1371327	0.0383169	154166090770273
55413	IRF3	CHGA	13651319	13651319	0.172177	137640243696545
377327	MEIS3	TTR	13502207	13502207	896.5	110474494918907
55598	LMX1A	CHGB	1342567	1342567	22.1029	126555508240948
126154	MEIS2	G6PC2	1339522	1339522	7.6425	131167645391984
137791	NFE2L2	GPR137B	13376896	13376896	0.0423321	153733303549655
306861	PROX1	SCGN	1330158	1330158	1766.24	107529495460001
20282	NR4A2	ASB9	13202657	13202657	292.278	11534203879002
65108	PLAGL1	COX4I2	-13181524	13181524	0.303291	145181401877273
55501	SMAD9	CHGB	-13160984	13160984	278430	855528342954854
346133	NEUROG3	ST3GAL6	-1314819	1314819	111.974	119508825435263
20288	CREB5	ASB9	-13054624	13054624	6.92738e+07	615943094292348
103087	EGR1	ERO1B	13033496	13033496	79.0552	11102069521693
55550	FOS	CHGB	1298033	1298033	307098	851272309869373
306876	TCF21	SCGN	-12961085	12961085	0.00020354	176913507627119
377270	RFX6	TTR	-12952198	12952198	6.98901e+07	615558453632623
306038	NKX6-1	SCG2	1288174	1288174	3.9133	134074566696893
55574	TGIF1	CHGB	-12833478	12833478	0.676361	131698217106585
55469	MAX	CHGA	12833464	12833464	1.27254	138953281526925
306785	ZNF704	SCGN	12833288	12833288	912.916	110395693277106
13565	XBP1	ANXA2	12822495	12822495	0.002078	166823542661363
65183	NFIX	COX4I2	12795772	12795772	0.00133561	168743201292256
217031	SOX5	MT3	12600428	12600428	2.65094	135766007784456
126155	ETV1	G6PC2	-12562919	12562919	123.703	119076197659091
126014	SOX5	G6PC2	-12562509	12562509	0.581069	142357722896984
9513	HOXB2	ALDOB	12552379	12552379	6.25802e-06	192035631045222
369561	NKX2-2	TM4SF4	12524776	12524776	0.809612	140917233087376
377318	RARG	TTR	-12439709	12439709	0.0654062	15184380930164
57758	NR4A2	CITED1	12422198	12422198	0.0612134	142131534531882
198554	PAX6	LSAMP	12412635	12412635	39.7907	114002180587878
378008	CDX2	TXNIP	12197356	12197356	83531.9	807814761736742
65536	PAX6	CPE	12118073	12118073	0.415111	143818356011894
377956	SOX9	TXNIP	120272055	120272055	84.3264	120740365477331
306890	DNMT1	SCGN	11992661	11992661	13008	988579061755259
390718	RORA	ZBTB20	11940173	11940173	0.00535091	162715719796831
377236	MEF2A	TTR	119320825	119320825	46241.1	933497217315001
55345	ZNF704	CHGA	-117654815	117654815	3.39238	134694953413445
261824	MEIS2	PDX1	11699801	11699801	2.00487	136979137891696
227217	RFX6	NEUROG3	11561106	11561106	0.0015235	158171562844097
55634	NFIB	CHGB	11471799	11471799	1549.69	10809754533661
377289	FOXA2	TTR	-11435776	11435776	1.35923e+06	786670717963806
296516	GATA6	RGS4	114164785	114164785	0.000112888	17947351627836
13621	NFATC3	ANXA2	-11411846	11411846	0.000173972	177595202397502
352370	RFX6	TAGLN3	114003725	114003725	0.00155407	158085301891351
306072	FOXO1	SCG2	11345251	11345251	0.334685	144753632956123
55378	ELF2	CHGA	-11320443	11320443	144.658	118396563480238
227350	MEIS2	NEUROG3	-112968706	112968706	0.0113485	14945062068256
55608	NFYA	CHGB	112912595	112912595	0.26592	145752482717261
198632	NR4A2	LSAMP	-11207884	11207884	0.000632741	171987742378429
13536	SMAD3	ANXA2	-111725986	111725986	309192	850977136445129
13681	KLF3	ANXA2	111097425	111097425	216484	866457406069086
13685	GLIS2	ANXA2	11092513	11092513	0.113317	14945704491161
328932	PAX6	SLC7A2	110500894	110500894	0.0173008	157619338296254
13660	IRF3	ANXA2	11035807	11035807	5.22301e-05	182820793245469
377281	CTCF	TTR	10969257	10969257	8982.48	904660374158922
217130	RORC	MT3	10939908	10939908	0.0478594	15320032542442
209099	NR4A2	MEIS2	10925589	10925589	0.000225861	176461586476251
207071	MTF2	MDK	108903304	108903304	0.109332	149612536228818
65525	XBP1	CPE	10887637	10887637	958.811	110182671932325
126153	NR3C1	G6PC2	10835203	10835203	0.116239	139346468216662
55787	NEUROG3	CHIA	-10794659	10794659	6547.65	101839143677517
55450	ELF3	CHGA	-10788508	10788508	3557.29	104488811527497
377283	RARA	TTR	-107241526	107241526	0.66702	141758613358103
189825	FEV	KRT7	107158326	107158326	0.000136507	178648448168785
39078	SOX5	CALML4	10683237	10683237	4.29392e-05	183671458805041
13670	TFDP2	ANXA2	-10676629	10676629	0.00119376	149230818098935
174241	BHLHA15	ISL1	10667234	10667234	0.266096	14574962422094
137864	KLF12	GPR137B	-10647271	10647271	0.0202596	156933693910358
55463	NR2F1	CHGA	-10638337	10638337	3.99622e+06	739835041519706
261685	PAX6	PDX1	106312975	106312975	344.702	114625564996118
328896	SOX5	SLC7A2	-10569515	10569515	1.01365e-05	189941136970823
261747	NEUROG3	PDX1	-105327256	105327256	1.9855	127021290901171
282728	NFE2L2	PTN	105310954	105310954	0.00537925	162692778823519
103107	FOS	ERO1B	-10460207	10460207	810604	809119140694257
137857	NFE2	GPR137B	10446384	10446384	0.0909781	150410633413454
13620	HNF4A	ANXA2	-10422936	10422936	0.127392	148948566716112
167386	PAX6	IGFBPL1	-1036987	1036987	24.7255	126068545892703
377932	SOX5	TXNIP	10354258	10354258	552686	825752183221406
55548	CREB3L2	CHGB	-103525355	103525355	926.168	110333104188633
282185	PAX6	PTGER3	103300475	103300475	737.422	111322838470099
306604	NR4A2	SCG5	10324751	10324751	8.24762e-07	190836715937927
377520	HES6	TUBB2B	10313123	10313123	0.390056	144088725792958
306781	BCL11A	SCGN	-10297328	10297328	21732.2	966289557680267
13701	GATA6	ANXA2	-1026058	1026058	329074	84827070136372
377965	PAX6	TXNIP	-10258201	10258201	1.06522	139725605691794
306804	RFX6	SCGN	10255321	10255321	57374.1	924128431770659
137858	CTCF	GPR137B	10222003	10222003	729.413	111370267799949
139717	RORA	GPX3	-1022024	1022024	27.5651	125596397276153
55839	ETV1	CHIA	10185855	10185855	179.402	117461729111293
13511	TFDP1	ANXA2	10141008	10141008	0.246802	136076516587332
65195	NFIB	COX4I2	10113486	10113486	77.7707	121091840073776
55610	E2F2	CHGB	101089396	101089396	5247.36	102800593776865
13588	CREB3L2	ANXA2	10108475	10108475	0.044648	153501977093579
377304	NEUROG1	TTR	-10100855	10100855	228098	864187809801573
306816	GATA4	SCGN	1005108	1005108	11.8834	129250605519217
55573	ETS1	CHGB	100426674	100426674	76.2522	121177474615742
306103	MEIS1	SCG2	-100319006	100319006	10.9512	129605372135476
152730	THRB	HIGD1A	10017777	10017777	265.475	1157597612381
309740	CREB3	SELENOM	99943295	99943295	0.00049827	163025349380592
20217	RFX6	ASB9	-9968542	9968542	5.12951e+06	728992454121292
174221	PAX6	ISL1	-9927196	9927196	39665.3	940158966352383
103905	MEIS2	ESM1	9835733	9835733	0.000440293	173562586910982
174230	RFX6	ISL1	9827685	9827685	168.609	117731194958752
306776	REST	SCGN	-9787045	9787045	323.524	114900932948543
57679	TCF7L2	CITED1	-9786275	9786275	6.43209e-06	191916475943864
13633	DMRT1	ANXA2	97831324	97831324	0.0212188	156732786377428
227351	ETV1	NEUROG3	977897	977897	227.534	116429533914632
377941	HOXB3	TXNIP	9747443	9747443	917.78	110372616193093
55375	FOS	CHGA	97324535	97324535	20507	968809835962139
73416	ARX	CXCR4	9680168	9680168	0.598716	142227793220525
259747	FOXP1	PCSK2	-9652572	9652572	0.0138909	148572688044708
38305	PATZ1	CALB1	96098855	96098855	0.0845597	150728368185501
13717	NR4A2	ANXA2	-9572337	9572337	279595	855347017423693
55624	KLF3	CHGB	-95133066	95133066	213.839	116699124682758
167144	NKX6-1	IGFBP5	9510045	9510045	3.25409e-05	184875706591163
13640	CDX2	ANXA2	-9481551	9481551	31.374	125034295502981
259752	GATA6	PCSK2	-946916	946916	607.908	112161623290312
152713	FEV	HIGD1A	-9459475	9459475	1794	10746177846368
55394	HNF4A	CHGA	9443162	9443162	0.0513116	152897842121314
20198	NR1H4	ASB9	-9430848	9430848	1.05792	139755459143256
103751	RFX6	ESM1	-9422962	9422962	0.278289	145555036855787
13668	E2F2	ANXA2	-9414223	9414223	11.6569	12933418184254
174208	DNMT1	ISL1	94086014	94086014	560.588	112513565149126
369615	NR3C1	TM4SF4	-93701206	93701206	54.3418	122648656493236
369603	FOSB	TM4SF4	-93667805	93667805	0.00234271	166302806885414
137916	DNMT1	GPR137B	9288327	9288327	80.4929	120942425440318
306156	HOXD3	SCG2	-9287703	9287703	0.0441851	153547241399693
9443	HOXB3	ALDOB	9278482	9278482	0.23079	136367835845413
13697	ETV5	ANXA2	-9258148	9258148	54.1564	122663502367841
55739	THRB	CHIA	922089	922089	1000.1	109999553110182
55658	FOSL2	CHGB	-92107266	92107266	255478	859264684901218
126025	HOXB3	G6PC2	-9194251	9194251	10762.9	996807186539651
55617	NFIX	CHGB	9191929	9191929	1.52785e+07	681591900893648
309688	ZNF704	SELENOM	91870174	91870174	52.4542	122802197015414
209133	RORA	MEIS2	9152298	9152298	0.0284376	155461065686616
55625	ELF4	CHGB	-9150063	9150063	0.0162882	157881262005199
228730	TCF4	NFE2	91306835	91306835	0.0514782	152883770218137
257610	ETV1	PCDH9	9116755	9116755	1.98427	137023991751732
55629	CREM	CHGB	9047042	9047042	145.058	118384595941931
20249	E2F2	ASB9	-9025163	9025163	0.00341633	164664405070757
377262	NR1H4	TTR	-900836	900836	7.20328e+08	514246984458766
282847	POU6F2	PTN	-8977196	8977196	1.50588e+07	682221033006232
137855	ZNF281	GPR137B	-8969298	8969298	550.695	112590886607246
306767	NFATC2	SCGN	-89647345	89647345	19.478	11710455900128
55688	RORA	CHGB	-89494996	89494996	16436.6	978418799576518
369592	NFIB	TM4SF4	8945017	8945017	10699.3	997064374539464
20220	NR5A2	ASB9	-8939276	8939276	5.49114e-05	182603373780217
379685	NFIA	UCHL1	-8895107	8895107	2495.27	106028831074416
259653	FOXO1	PCSK2	8888876	8888876	463.435	113340107027155
324744	MECOM	SLC30A8	-8868518	8868518	0.018677	157286937385052
126046	BBX	G6PC2	8836939	8836939	93.8581	120275284483648
207067	KLF10	MDK	8833315	8833315	0.071933	151430715984192
109770	KLF6	FAM162B	88207826	88207826	0.0446758	15349927670453
13659	CXXC1	ANXA2	88035926	88035926	10444.6	998110769489056
306817	MAZ	SCGN	-8801476	8801476	98.2792	120075383537584
73295	SOX5	CXCR4	-87908186	87908186	4.07574e-06	193897932750583
306885	ZEB1	SCGN	-8788943	8788943	2.2418e+08	564940362648922
88865	FOS	DUSP1	87506525	87506525	2306.54	106370398535107
306777	SMAD3	SCGN	-8739208	8739208	1225.36	109117368010649
306482	THRB	SCG5	87306425	87306425	0.00117153	169312479486213
96038	JUNB	EGR1	8720987	8720987	2.37787e+06	762381144603288
377279	TGIF1	TTR	8712284	8712284	1.35211e+08	586898882325716
306857	EGR2	SCGN	8706736	8706736	68.9303	12161590139048
208999	HOXB2	MEIS2	-8698856	8698856	0.000149754	178246223840855
192622	NFIA	LGALS2	-8697786	8697786	0.0268322	155713444187131
211496	ARX	MGST1	8665297	8665297	1.13638e-06	199444747074358
192561	TGIF1	LGALS2	86553566	86553566	1.59012e-06	187985694137847
378007	SOX13	TXNIP	8604541	8604541	0.00784867	151052039611379
377301	NR2F2	TTR	-8574653	8574653	123387	8908730698699
217165	ETV1	MT3	-8564868	8564868	19063.4	971979941901646
306858	RORC	SCGN	8560848	8560848	127115	889580361036709
79532	TCF12	DIRAS3	-8551337	8551337	1.16046	13935369938193
309670	KLF4	SELENOM	-85447595	85447595	237.74	116238980423939
55464	FOXN3	CHGA	8540664	8540664	3.27991e+06	748413801180904
296464	STAT1	RGS4	8534949	8534949	24.5815	12609390820255
55566	ATF2	CHGB	-8515032	8515032	0.00050894	172933332847713
369586	ARX	TM4SF4	8510776	8510776	23.44	126300424249309
333003	EGR1	SMU1	85019425	85019425	8.61318e-06	190648365740235
377328	PPARA	TTR	84781945	84781945	271.195	115667188026718
306782	SOX5	SCGN	-84413655	84413655	56780.7	924579890805456
55455	NR4A2	CHGA	-8423727	8423727	265238	857636469978158
103885	FOXN3	ESM1	-8415949	8415949	0.000234357	166301214372472
100204	NKX6-1	ELP4	83741106	83741106	0.0237848	156237007832616
306176	POU6F2	SCG2	-8343567	8343567	41053.5	938664928473865
352350	RFX3	TAGLN3	83381176	83381176	1826.31	107384247354768
13552	E2F8	ANXA2	8309484	8309484	1132.98	109457775982181
329373	SOX5	SLC7A8	-8309357	8309357	0.0100525	159977253467965
139680	TFDP2	GPX3	8306087	8306087	1.65212	127819588707455
126058	HOXB2	G6PC2	-8297201	8297201	15817	980087467783171
327072	TCF7L2	SLC3A2	-8297042	8297042	0.0133849	158733852617556
306153	FOXP1	SCG2	-8290037	8290037	0.0819368	140865209335897
282254	ZNF385D	PTGER3	82745284	82745284	0.00822541	160848423674197
309762	KLF10	SELENOM	8262658	8262658	197714	870396186071051
290904	FEV	RBP2	-8229417	8229417	865.718	100626234303737
146038	SOX5	H2AC21	8215645	8215645	0.000163733	17785863864733
9609	IRF7	ALDOB	8212208	8212208	0.00380214	154199715113049
299211	SOX5	ROBO2	-8175902	8175902	0.0574167	152409619882383
55641	MAFA	CHGB	-8170868	8170868	2.58664e-05	185872639275677
299444	RORA	ROBO2	8167593	8167593	0.0272634	1556442016768
324824	IRF3	SLC30A8	8163607	8163607	0.125864	149001001664562
377240	NFE2L2	TTR	-81634805	81634805	9.43843e+07	602510002104948
103104	RFX6	ERO1B	-81594884	81594884	669.85	111740227547462
55341	E2F8	CHGA	-8139333	8139333	0.445346	133513028816697
20297	RORA	ASB9	8133694	8133694	36695.7	943538486564576
373011	FOXP1	TOX	8126757	8126757	341.794	114662355650419
296524	BCL11B	RGS4	8105599	8105599	0.798735	140975970458508
348798	PAX6	STMN3	8104587	8104587	0.0726232	151389247639607
137915	KLF6	GPR137B	-8098576	8098576	7.29702	131368545124359
55744	RFX6	CHIA	-80936976	80936976	2517.44	105990407189324
377244	NR2C2	TTR	8046272	8046272	0.489348	143103821316292
370763	PAX6	TMEM52	8037045	8037045	1.14102e-07	199427053064772
877	PAX6	ABCC8	8007415	8007415	1.48989e-06	198268469148084
101735	FEV	ENPP2	-8005093	8005093	0.000736189	171330105005485
291025	ETV1	RBP2	-8003346	8003346	1743.67	107585357285779
259786	RORA	PCSK2	8001565	8001565	306.315	11513831280926
65469	IRF7	CPB2	7996793	7996793	0.248629	146044482892623
55687	KLF6	CHGB	-7943724	7943724	1.18019e+06	792804894851895
152841	RORA	HIGD1A	-79362914	79362914	573397	824154459047968
55582	SOX13	CHGB	7933689	7933689	2.33868e+08	563102858488579
137782	KLF4	GPR137B	-7910167	7910167	21397.3	966964191224301
55352	DNMT1	CHGA	-7868727	7868727	1.39401	138557340473536
167113	RORA	IGFBP2	-78543544	78543544	0.0794657	140998203967426
261765	ARX	PDX1	-7844369	7844369	9.39664e-05	180270274600408
306779	SMAD9	SCGN	7818231	7818231	760.396	111189603638374
139652	GATA4	GPX3	7813826	7813826	157.059	118039384086113
55637	ETV1	CHGB	7802894	7802894	4.65327e+07	633224219864269
13528	ZBTB37	ANXA2	77902794	77902794	2.64868	125769712054071
346171	FOXN3	ST3GAL6	-7784534	7784534	601730	822059837940515
282173	BHLHE41	PTGER3	7766783	7766783	0.234977	136289752198716
306826	TGIF1	SCGN	7762847	7762847	503075	829836755267762
38453	FOXN3	CALB1	-7755059	7755059	30.4552	125163391678807
79458	ASCL2	DIRAS3	7749118	7749118	2863.24	105431429250707
177223	ELF2	JUNB	77454455	77454455	1.50682e+09	482193928961041
13740	MZF1	ANXA2	7744219	7744219	5.78505	13237693070076
378042	ARX	TXNIP	-7741488	7741488	118.767	10925304400374
139627	NR1H4	GPX3	7739207	7739207	0.0134095	158725878318414
73326	PAX6	CXCR4	77274054	77274054	2.48584	126045275199394
13675	NKX2-3	ANXA2	-7716257	7716257	100954	899587566841156
309694	FEV	SELENOM	7708806	7708806	43.8728	123578043166848
259407	PAX6	PCSK1N	7699943	7699943	0.0134843	158701720952353
77207	LMX1A	DDC	76961584	76961584	7.77206e-06	181094638327647
282836	NR4A2	PTN	769605	769605	70.518	121517002801293
55564	MAZ	CHGB	7683515	7683515	129.493	118877528918206
55374	BBX	CHGA	76815285	76815285	650.39	111868262891361
55481	JUNB	CHGA	767547	767547	5.00784e+06	730034983359554
137817	EGR1	GPR137B	76315574	76315574	8.88648e+07	60512702904292
13634	NFE2	ANXA2	7621121	7621121	55.6653	122544153450748
282264	FOXN3	PTGER3	-7618688	7618688	521.046	112831239756283
198652	ETV1	LSAMP	-7604583	7604583	90.883	120415172854205
20279	FOSL2	ASB9	-7600509	7600509	23.1947	116346115059448
152680	PATZ1	HIGD1A	7583514	7583514	1.53888	13812795691291
13516	PATZ1	ANXA2	7577559	7577559	37.0612	124310808076455
151818	ETV5	HHEX	7570148	7570148	3.72211	134292104568287
306124	IRF3	SCG2	7545072	7545072	0.0134721	158705658721781
13722	NR2F1	ANXA2	-7538234	7538234	5003.16	10300755958786
306795	SOX9	SCGN	75368024	75368024	480462	831834064608162
309723	CTCF	SELENOM	7516492	7516492	15.5565	128080874572096
306848	ZNF250	SCGN	75062215	75062215	0.0182509	147387155753559
143490	HOXB2	GSTM3	7485692	7485692	0.0175473	157557899151247
55513	NR2F6	CHGB	7484775	7484775	567.765	112458312134745
137893	ELF1	GPR137B	7475037	7475037	1.13003	139469098319445
227315	GATA6	NEUROG3	7439847	7439847	0.00158421	168001874956334
103739	FOXO1	ESM1	7419508	7419508	5.76084	122395145093632
88972	ETV1	DUSP1	-7418782	7418782	0.065763	151820184997858
309747	EHF	SELENOM	741304	741304	10.2508	129892410950459
13678	HSF1	ANXA2	74046165	74046165	74849.7	912580965746109
55497	SMAD3	CHGB	740044	740044	0.182497	147387449409251
9405	ASCL2	ALDOB	73952995	73952995	11.8742	129253950344521
37234	MEIS2	CACNA2D1	-7377841	7377841	1.93057	137143146190153
103159	CREB1	ERO1B	-73656715	73656715	21418.7	9669206923819
55824	FOXN3	CHIA	-7357267	7357267	35119.2	945445555449472
217049	SOX9	MT3	734264	734264	82.9042	120814234048416
103202	MTF2	ERO1B	-7335183	7335183	1164.45	109338789578628
55825	FOXA1	CHIA	-73325	73325	0.00412807	163842533379968
306788	NR2F6	SCGN	-73294386	73294386	105679	897601310331647
55689	E2F6	CHGB	7327855	7327855	0.215129	146673007597121
126016	MECOM	G6PC2	-7324003	7324003	1835.92	107361473660293
282153	ASCL2	PTGER3	7314025	7314025	4151.12	103818349265896
306495	BBX	SCG5	7307733	7307733	34.8079	124583218910463
306830	PAX1	SCGN	-73002234	73002234	95.3801	120205423424427
126826	SOX5	GADD45A	-7288621	7288621	51.9674	122842691778092
207064	BCL11B	MDK	72863646	72863646	538.622	112687160948352
74768	TGIF1	DACH1	-72774895	72774895	0.0048855	163110906615634
103133	ZNF281	ERO1B	-7277368	7277368	0.434882	143616281711594
378067	ETV6	TXNIP	7257699	7257699	0.118009	14928084553139
13728	FOXA3	ANXA2	-7249444	7249444	603.231	112195163546961
55414	ETV4	CHGA	-7248246	7248246	2.46962	136073695753314
282248	NFIB	PTGER3	-7225344	7225344	2873.26	105416247244263
300389	NEUROG3	ROS1	72211996	72211996	0.00620933	162069552482753
377256	SIX6	TTR	-7213923	7213923	3.11912e+06	750596722441736
252193	NR4A2	P2RY14	7209896	7209896	0.189096	147233180697362
55435	EHF	CHGA	-72006665	72006665	1981.08	107030979165966
259656	THRB	PCSK2	7192818	7192818	99.5649	120018937307509
79586	NR2F1	DIRAS3	-7188708	7188708	88140.4	905482493700312
103167	CREB3	ERO1B	71850896	71850896	0.0666017	151765144406146
152827	FOXN3	HIGD1A	-7177219	7177219	386.039	114133683153062
13590	E2F1	ANXA2	-7171398	7171398	7413.45	101299794951866
39107	RFX6	CALML4	-7158568	7158568	0.00583127	162342372179628
20296	PAX4	ASB9	-7153376	7153376	6700.31	10173905410315
306107	CDX2	SCG2	-7146695	7146695	0.00010125	179946037116053
126019	ATF1	G6PC2	713389	713389	8.30719e-07	200805459941782
218575	RORA	MTSS1	7129924	7129924	0.0203701	15691005822717
261800	NR4A2	PDX1	71268	71268	31817.5	949733444746767
13673	NHLH1	ANXA2	7124397	7124397	1.08419e+06	796489487208346
65590	ELF4	CPE	7123482	7123482	0.365849	144366980603349
137815	FEV	GPR137B	-7123256	7123256	8658.12	100625762773349
149931	PDX1	HEPACAM2	7096149	7096149	5.06717	132952348891896
370426	PLAGL1	TMEM176A	7092015	7092015	145.434	118373343158379
198565	BBX	LSAMP	7090803	7090803	1772.26	107514724681185
209048	HEYL	MEIS2	-7077393	7077393	0.0149691	158248030204966
26121	ISL1	BAMBI	703672	703672	1.36167e-05	188659288520201
103049	KLF4	ERO1B	-70339866	70339866	82465	908373040256746
126122	ETV5	G6PC2	-7025559	7025559	12224	991278610970129
103135	CTCF	ERO1B	7018983	7018983	901.04	110452561669783
75717	NR4A2	DCDC2	7018353	7018353	9.32144e-09	18030516994173
38382	TGIF1	CALB1	7010726	7010726	3.32904e-05	1647768051038
306819	BHLHA15	SCGN	700662	700662	307.097	115127248228077
38457	KLF10	CALB1	-7004497	7004497	0.00547144	162618982503191
55381	FOXP4	CHGA	7000942	7000942	26.4029	125783485177458
57729	CXXC1	CITED1	6969979	6969979	213406	867079390092102
369596	NFIA	TM4SF4	696894	696894	228.15	116417795443642
306860	PKNOX2	SCGN	6944597	6944597	10.5692	129759569532719
379603	HOXB2	UCHL1	6933535	6933535	0.07736	151114835285093
100309	NFIB	ELP4	-6913427	6913427	1.06893	139710488511534
55517	JDP2	CHGB	-6912479	6912479	75.8731	121199122418448
227180	SOX5	NEUROG3	689559	689559	6921.26	101598145425271
13599	ETV2	ANXA2	6893667	6893667	11.3473	129451061473958
96010	FOSB	EGR1	6889353	6889353	1189.96	109244692175648
306845	CXXC1	SCGN	6864454	6864454	6073.35	102165714333412
55466	KLF10	CHGA	-68601385	68601385	20.2769	126929978810462
9509	GATA4	ALDOB	68562284	68562284	0.000133591	178742216633505
377645	RORA	TUBB2B	-68447165	68447165	111.923	119510807873124
100194	ASCL2	ELP4	684235	684235	23.2791	126330331024258
306889	KLF6	SCGN	6841622	6841622	60197.6	922042117608322
65517	TCF7L2	CPE	-6837936	6837936	48.2224	11316750990382
324874	TCF21	SLC30A8	-68229064	68229064	1.16162	139349357352113
137872	ETV4	GPR137B	68214394	68214394	940.406	110266844633671
208933	HOXB3	MEIS2	-6795972	6795972	2347.67	106293620787013
103182	ZNF385D	ERO1B	6789209	6789209	185.852	107308328234723
296466	NR1H4	RGS4	6788359	6788359	5.11485	132911668979777
126011	NKX6-1	G6PC2	6785235	6785235	5656.55	102474484971917
217127	ELF4	MT3	-6784568	6784568	35.4653	124501959327528
70072	FOXP1	CRYBA2	677905	677905	119.168	119238392189754
88839	EGR1	DUSP1	6771854	6771854	699181	81554105564156
209058	LIN28B	MEIS2	-67373365	67373365	0.019455	15710968536384
282749	NR1H4	PTN	-6732672	6732672	13054.2	988424958964946
55642	ETV5	CHGB	6723366	6723366	178413	874857424602932
377272	HOXB5	TTR	6719302	6719302	7.52663e+08	512339946101419
126069	SOX13	G6PC2	-671226	671226	52.155	122827039837008
378040	NR3C1	TXNIP	6710091	6710091	4658	103318001349149
377252	MEF2B	TTR	6708284	6708284	58358.9	923389286215993
105931	ARX	ETV1	67077026	67077026	0.0255351	155928621509665
390686	FOXP1	ZBTB20	6701554	6701554	4.51419e+06	73454200813606
259686	MAF	PCSK2	66983044	66983044	0.0930625	140312254759775
174214	RFX3	ISL1	-6697707	6697707	361.778	114415579210357
227195	NEUROD1	NEUROG3	6692711	6692711	0.0475295	153230363843803
227212	THRB	NEUROG3	-6678313	6678313	0.51959	142843396043742
373018	NR4A2	TOX	6678152	6678152	3.95821	124025015719321
20196	XBP1	ASB9	6662689	6662689	9028.76	904437201192727
73421	CDC5L	CXCR4	66501066	66501066	0.000715383	171454612246683
112696	ISL1	FEV	-66448726	66448726	27.7363	125569508598815
55649	ETV6	CHGB	66284016	66284016	1.93132e+09	471414584856851
65514	KLF11	CPE	-6622337	6622337	203.969	116904367293178
13735	PPARA	ANXA2	66024326	66024326	271.468	115662818212886
65507	TGIF2	CPE	-6600715	6600715	14.3947	128417974123431
103088	SOX9	ERO1B	6597409	6597409	149.86	118243156134454
13593	FOS	ANXA2	-6590486	6590486	1.09426e+08	596087840699421
13726	FOXA1	ANXA2	-6576342	6576342	4.137e+06	738331418549762
55800	RORC	CHIA	65751724	65751724	5152.64	102879705104745
25066	THRB	B2M	65524295	65524295	56.8072	122455963934326
70047	ZNF281	CRYBA2	6549722	6549722	0.00304536	155163606556384
126038	MAFG	G6PC2	6544774	6544774	1.92506	137155563906328
306877	BCL11B	SCGN	65421954	65421954	757.483	912062715883471
25101	TGIF1	B2M	6526348	6526348	0.000204308	176897141130824
20228	HNF4A	ASB9	-65180846	65180846	4391.65	103573722586445
139700	ELF3	GPX3	6515561	6515561	1363.56	108653243764645
390720	MEIS2	ZBTB20	6504103	6504103	4732.87	103248756436497
13662	BACH2	ANXA2	-65031625	65031625	13.6596	128645612843375
55595	NFIC	CHGB	650175	650175	700.623	111545153195433
309737	TFDP2	SELENOM	6493073	6493073	171.492	117657571521968
137780	TFDP1	GPR137B	6491766	6491766	165.65	117808093254885
174275	CREB3	ISL1	64828135	64828135	379709	84205485758449
282151	PATZ1	PTGER3	6474591	6474591	0.000128634	178906451365031
253103	SOX5	PAPPA2	-6457948	6457948	0.00498728	163021365411821
378045	NR3C2	TXNIP	-64408526	64408526	15.0043	128237834441354
387895	RORA	YBX1	-6432247	6432247	3.87404e-10	234118362219671
55551	ELF5	CHGB	-6428573	6428573	0.0011164	159521810438877
207044	RORC	MDK	64262725	64262725	0.291768	14534962956443
137909	KLF10	GPR137B	6422495	6422495	98609.6	900608098452847
103070	TCF7L2	ERO1B	6422433	6422433	943.803	110251185364397
377995	FOXK2	TXNIP	-642042	642042	4.76045e-06	183223523418951
379658	NFIX	UCHL1	-6419011	6419011	0.0653227	151849358217186
112600	SOX5	FEV	6402508	6402508	6.49283	131875658100598
117421	FOS	FOSB	6398393	6398393	207124	868376866859797
140826	ARX	GRIA3	63700676	63700676	0.153033	148152140170728
117233	THRB	FOS	-6362826	6362826	363.117	114399534763238
55614	TFDP2	CHGB	6355487	6355487	64873.7	918793151567925
306629	KLF6	SCG5	63476935	63476935	25.6123	125915512560655
65580	E2F2	CPE	-63458905	63458905	227.323	116433566138742
369590	PKNOX2	TM4SF4	-63333996	63333996	9.74768	130110988710734
112594	PLAGL1	FEV	-6315918	6315918	2.51166	136000395536801
103899	ZEB1	ESM1	-63103534	63103534	1.21287	139161856488077
103112	ETV2	ERO1B	6293057	6293057	428.78	113677659733
198620	RORC	LSAMP	-62892966	62892966	0.234376	146300863874882
2997	SMAD9	ACVR1C	6276342	6276342	0.0483637	153154800432957
20218	E2F1	ASB9	-62644415	62644415	19211.7	971643432708998
74831	RORA	DACH1	62623285	62623285	558.007	112533605828264
174242	MAF	ISL1	6251793	6251793	193.627	117130336605674
55473	PAX4	CHGA	625091	625091	1.5284e+06	781576215895378
65611	MAX	CPE	62503785	62503785	82.7025	12082481151455
217044	RFX3	MT3	62433846	62433846	471804	832623793115358
276236	TCF7L2	PPP1R1A	-62424123	62424123	0.00267662	165724133438645
55640	ATF3	CHGB	-6239844	6239844	1.13272e+06	794587716266869
57675	SMAD9	CITED1	6235117	6235117	17546.5	975580948898458
329410	CDX2	SLC7A8	-6230714	6230714	0.109461	149607400283532
207038	NR3C2	MDK	-62283125	62283125	49.4086	123061974871706
55376	ELF5	CHGA	-6225578	6225578	2.38139	136231693739519
217121	LIN28B	MT3	-62204164	62204164	418.4	113784087278578
13637	SP3	ANXA2	62129006	62129006	0.0193884	157124571762773
372941	THRB	TOX	62048994	62048994	0.39196	144067587266415
152708	NR2F6	HIGD1A	-6195334	6195334	288.118	11540430122127
55524	IKZF1	CHGB	61946247	61946247	0.559162	142524620970761
309760	BCL11B	SELENOM	6189962	6189962	369843	843198239554732
282270	KLF10	PTGER3	-61856303	61856303	0.115345	149380009131983
262243	LIN28B	PEG10	6185134	6185134	0.0850158	140705004902846
137810	ATF1	GPR137B	6181078	6181078	0.0433693	153628175042778
387091	ASCL2	XBP1	61803117	61803117	5.60079e-07	202517504064639
377925	SMAD3	TXNIP	-6179007	6179007	110780	895553772935079
377269	MESP2	TTR	61679307	61679307	1.13095e+06	794655526525805
59888	SOX5	CLU	-61653133	61653133	3.63419	134395929650604
54125	FEV	CFAP61	6162726	6162726	1.40814	138513552094703
55553	KLF15	CHGB	61578598	61578598	103.425	119853730947249
309693	XBP1	SELENOM	-6144776	6144776	19921.5	870067884127074
299644	FEV	RORA	-61368253	61368253	0.0297604	155263612671207
55545	IRX6	CHGB	61338846	61338846	197.824	11703720879356
302257	PAX6	RUNX1T1	61266486	61266486	473.321	113248439343706
79525	MAZ	DIRAS3	61262015	61262015	1.43887	13841978167421
61039	FEV	CNTN1	-61227757	61227757	0.00394334	164041359635216
13672	ZNF444	ANXA2	-61200578	61200578	58109.7	923575115592666
174204	ZNF704	ISL1	6118784	6118784	1374.98	108617037245266
227197	RFX3	NEUROG3	6117418	6117418	391.217	114075826006982
189934	NFIB	KRT7	61107557	61107557	5.84832	132329690146291
13628	TEAD3	ANXA2	6108593	6108593	0.145623	148367713601753
306526	SOX13	SCG5	-6099905	6099905	131.106	118823783974531
65189	GLIS2	COX4I2	-609805	609805	1.84211	137346835692794
137896	ZNF385D	GPR137B	6090757	6090757	8769.65	100570177581707
290993	IRF3	RBP2	60854025	60854025	0.0901462	150450524431072
55460	NFIL3	CHGA	6083853	6083853	214161	866925888133619
55584	KLF12	CHGB	60791347	60791347	1232.41	109092435316959
13696	ATF3	ANXA2	60742084	60742084	19732.3	970482161980232
13524	NFE2L2	ANXA2	60723666	60723666	82655.9	908272604371311
152822	NR4A2	HIGD1A	6065236	6065236	9.68858	130137398154941
2987	ASCL2	ACVR1C	60578812	60578812	9.98112	130008205851771
180190	ETV1	KCNJ8	60500726	60500726	1.69322	137712858897948
38318	ZNF75D	CALB1	6044857	6044857	0.119583	149223287684973
151741	PAX6	HHEX	-6033615	6033615	3.10476e+07	650797180160816
109686	ZNF704	FAM162B	-6031624	6031624	0.000189003	177235320247843
259783	PAX4	PCSK2	-6028917	6028917	45.1886	123449715793381
227342	PAX4	NEUROG3	60216673	60216673	1.92555	137154450352021
324800	TGIF1	SLC30A8	-6001845	6001845	0.000267389	165728567928259
327141	IRF7	SLC3A2	6001809	6001809	25.3967	125952235232409
13611	MAZ	ANXA2	-59987016	59987016	156.72	118048768982954
135102	ARX	GLS	598133	598133	0.00999047	160004139410956
377969	THRB	TXNIP	-598084	598084	456966	834011579767219
285504	FOXN3	RAB26	59807062	59807062	50.2589	122987868945675
70082	KLF10	CRYBA2	59728093	59728093	992.43	11003300310777
65544	CREB3L2	CPE	59617363	59617363	24.0972	126180338527862
282822	ETV5	PTN	-59610393	59610393	5180.7	102856116307047
346150	RORA	ST3GAL6	59534565	59534565	442.659	113539309018899
20203	ATF4	ASB9	59505787	59505787	2.42895e+06	76145811208156
227332	FOXN3	NEUROG3	59483998	59483998	30.4435	125165052042884
55525	NR1H4	CHGB	5947873	5947873	6.782e+07	61686423940002
152768	MNX1	HIGD1A	59423573	59423573	4700.03	10327899231098
259699	CDX2	PCSK2	-59419148	59419148	230.397	116375238240006
309700	PAX6	SELENOM	59267938	59267938	1.99296e+06	770050200172938
208942	NR1H4	MEIS2	-5926714	5926714	0.176687	147527961459242
290482	ZEB1	RBFOX1	59226148	59226148	4.43971e-07	203526452084553
35173	THRB	C6orf52	-59216525	59216525	0.127213	148954693226045
47547	NR4A2	CDA	5920392	5920392	2.08104	136817198964481
309734	ETV4	SELENOM	59116736	59116736	33.8917	124699066933588
140735	FOXO1	GRIA3	58812235	58812235	0.0906266	150427442526894
167014	THRB	IGFBP2	-58701016	58701016	77993.9	91079391100149
369534	RFX3	TM4SF4	-58599748	58599748	4.37227e+08	535929306200482
109748	RORA	FAM162B	-58427643	58427643	5.36309e-05	18270585317528
306835	KLF12	SCGN	-58390502	58390502	73.6242	111329792575128
217103	SOX10	MT3	58383048	58383048	41.7586	123792545484854
65157	BHLHA15	COX4I2	-5832792	5832792	0.279927	145529559346585
55398	ETS1	CHGA	-58272414	58272414	24844.9	960476307265917
20254	TFDP2	ASB9	-5825382	5825382	66.0252	121802899683541
259212	PDX1	PCSK1	582162	582162	2.22016e-06	196536153726004
285384	PLAGL1	RAB26	-58205225	58205225	2612.1	105830096577327
329454	NR4A2	SLC7A8	-58195844	58195844	0.588055	132305818038371
369547	RFX6	TM4SF4	58170144	58170144	407574	838979307154341
41343	ETV1	CASR	5814751	5814751	0.00261929	165818158170325
259357	SNAI2	PCSK1N	-5806306	5806306	0.000500332	163007417220905
100328	TCF21	ELP4	-57981152	57981152	214.835	116678943005007
227199	NR1H4	NEUROG3	579693	579693	39.2665	124059773861981
74806	RORC	DACH1	5794794	5794794	15.8758	127992649662458
34854	THRB	C4BPB	-5786417	5786417	0.00251418	165996029695075
139658	ETS1	GPX3	-57855017	57855017	837.669	110769274164533
54223	NEUROG3	CFAP61	57637554	57637554	250.696	11600851794803
276231	SMAD9	PPP1R1A	57615995	57615995	875853	805756873564988
259554	GATA6	PCSK1N	-57495553	57495553	3.9539e-07	204029741110423
109739	LIN28B	FAM162B	-57435475	57435475	0.289883	145377778154818
38428	PROX1	CALB1	-57429943	57429943	575058	824028816200809
282820	IRF7	PTN	-57413127	57413127	1.56594	138052238897637
306809	KLF15	SCGN	-57410397	57410397	33.3136	124773783786449
70029	FOXP4	CRYBA2	-57321798	57321798	0.0593383	152266651239453
139623	STAT1	GPX3	5729896	5729896	841749	807481717369157
227174	SMAD9	NEUROG3	-57295613	57295613	0.201585	146955409992378
117393	EGR1	FOSB	57247214	57247214	460.132	113371179019676
174177	POU2F1	ISL1	5722203	5722203	0.00611947	15213285954351
217126	NR3C2	MT3	57030614	57030614	25467.7	959400953666527
179373	PAX6	KCNJ11	5701817	5701817	0.0012295	169102719352769
139509	PAX6	GPX1	56926277	56926277	92.1384	120355592005819
279208	ETV1	PRNP	568279	568279	0.000485017	153142426553732
34823	SOX5	C4BPB	56786474	56786474	2.30842e-07	186366849597645
198612	NR3C1	LSAMP	56768335	56768335	22.373	126502758286306
294705	FOXP1	RFX3	5672665	5672665	0.0415796	153811196058912
57685	DNMT1	CITED1	5670528	5670528	36166.4	944169484643517
65522	ATF1	CPE	567034	567034	0.0891342	150499558018171
217154	MAX	MT3	56676086	56676086	1870.71	972799292835955
126095	BACH2	G6PC2	-5666868	5666868	0.701657	131538754343169
55656	ELF3	CHGB	56618776	56618776	2.084e+09	468110300265338
65610	KLF10	CPE	-5661853	5661853	844.445	110734288122135
55409	PTF1A	CHGA	-56590695	56590695	7.69622	131137223703886
306069	ATF4	SCG2	56532297	56532297	38816.7	9410981569894
55355	NR1H4	CHGA	56520738	56520738	1.61235e+07	679254178621269
377994	HOXB2	TXNIP	5650993	5650993	654913	818381611034416
329066	ZNF385D	SLC7A2	56340814	56340814	0.000196334	177070051134714
105834	ISL1	ETV1	56328766	56328766	26667.7	857401474104665
378091	PPARA	TXNIP	-56307264	56307264	330018	848146203501661
139620	ZNF704	GPX3	56293085	56293085	248.248	106051147292046
324775	BBX	SLC30A8	56221955	56221955	19700.5	970552331916617
286516	EGR1	RABEPK	56174606	56174606	4.85497e-08	213138131116439
174316	KLF6	ISL1	56149647	56149647	108.079	1196625782266
13940	NR4A2	ANXA4	56139186	56139186	0.221973	146537008143983
294597	NEUROD1	RFX3	56061275	56061275	0.0230358	156375974224715
117570	JUNB	FOSB	5605504	5605504	41.2186	123849063919572
322570	PAX6	SLC22A17	56023777	56023777	0.731461	141358091022522
65542	HES1	CPE	-5600791	5600791	41.5217	123817249419987
79562	ELF4	DIRAS3	55991583	55991583	1.20043	139206649325009
377997	HNF4A	TXNIP	-5595822	5595822	2.96493	135279861663282
137826	SMAD5	GPR137B	5595289	5595289	0.462887	143345251678506
206998	ETS1	MDK	55898283	55898283	3.28561	134833844028945
55597	E2F5	CHGB	55895053	55895053	9771.63	10010032979788
13679	ZNF283	ANXA2	-5581984	5581984	276351	855853966681569
155351	PAX6	HMGN3	5576667	5576667	6.00853	132212319049332
227312	NFIA	NEUROG3	55613108	55613108	644182	819099165885969
177214	NFYC	JUNB	55546284	55546284	8036.12	100949534918488
103150	TCF7	ERO1B	555399	555399	24.3544	126134224319882
55626	TP73	CHGB	55527337	55527337	1.83783e+06	773569375234457
20181	TEAD2	ASB9	-55504594	55504594	105.044	109786290927607
283521	FEV	PTPRN2	-55455938	55455938	0.000255173	175931650440256
299251	PAX6	ROBO2	5540873	5540873	0.015036	158228673406085
282169	BCL11A	PTGER3	55370055	55370055	946.858	100237152701314
38010	FOXP1	CADM2	-55368017	55368017	33.3958	124763086069573
61056	PAX6	CNTN1	55367686	55367686	0.258051	145882949068298
217038	ZNF704	MT3	-5536154	5536154	1347.89	108703446690577
298773	E2F3	RNF152	55344004	55344004	0.161205	147926210904632
55503	KLF11	CHGB	-55295445	55295445	23024.1	863781800803542
174207	NR2F6	ISL1	-55242024	55242024	100586	899746364969883
103074	ZNF704	ERO1B	55215117	55215117	4.91822e+07	630819169211218
346158	GATA6	ST3GAL6	-55105213	55105213	450602	834620673846042
55577	CTCF	CHGB	55095106	55095106	93919	902724645730226
152684	ASCL2	HIGD1A	55063363	55063363	3.02973e+07	651859622575445
378001	ETS1	TXNIP	5503311	5503311	14.6703	128335605219623
207079	RORA	MDK	-54918073	54918073	2149.97	10667566995678
74747	PAX6	DACH1	54904856	54904856	65053.5	918672952137131
282758	THRB	PTN	5488407	5488407	200750	869734358370858
55618	NKX2-3	CHGB	-54741126	54741126	1.81966e+06	774001009533003
75738	DNMT1	DCDC2	54719362	54719362	5.05566	132962221577341
369831	HEYL	TMED3	5471626	5471626	55.9654	122520806064454
55596	DLX2	CHGB	-54715242	54715242	0.911469	130402579548035
167350	PBX1	IGFBPL1	-54698907	54698907	10868	896385073673055
261770	CDC5L	PDX1	5458019	5458019	38.684	114124690243888
47549	TCF21	CDA	-54524776	54524776	953.816	110205352403011
38043	KLF6	CADM2	54464657	54464657	0.000602383	17220127171696
140860	NR4A2	GRIA3	5438468	5438468	0.0366729	154356546959798
20182	SMAD3	ASB9	-54294348	54294348	291292	853567118903178
72123	ETV1	CTSZ	5429045	5429045	2.93512	135323744123397
378075	ELF3	TXNIP	54278526	54278526	3.5505e+06	74497101475649
282233	TFDP2	PTGER3	-54220274	54220274	0.0192953	157145491734126
47459	FEV	CDA	-54100774	54100774	315806	850058014236495
55803	ELF1	CHIA	54099023	54099023	1.41725e+08	584855279916109
228694	EGR1	NFE2	54009415	54009415	582216	823491580724153
207030	TFDP2	MDK	53845927	53845927	6.3507	131971782958699
37205	ATF3	CACNA2D1	-53837743	53837743	7656.85	101159499672571
152795	KLF3	HIGD1A	5381971	5381971	15.4788	128102627667428
152788	E2F2	HIGD1A	-5373904	5373904	3.00127	135226948557195
302242	NEUROD1	RUNX1T1	53738017	53738017	0.130586	14884104480738
55708	TCF7L2	CHIA	-53623185	53623185	2.87174e+06	754185436231321
103160	THAP11	ERO1B	-53584	53584	1138.59	10943632932423
55638	ELF1	CHGB	53543936	53543936	2.33383e+07	663193060761523
306768	MYBL2	SCGN	-53526893	53526893	4.06562e+07	639087307437374
39162	NEUROG3	CALML4	-5350385	5350385	28207.9	954962987147798
9474	THRB	ALDOB	-53452607	53452607	10.8589	129642159795927
309749	ELF1	SELENOM	53395305	53395305	1.9477	137104771152173
288508	FOXN3	RARRES2	-5338371	5338371	0.000865816	160625742723893
38422	ELF4	CALB1	53381212	53381212	0.344338	144630146401251
309744	EGR2	SELENOM	53378753	53378753	0.20561	146869565033689
146120	RORC	H2AC21	53330246	53330246	0.178137	147492456548048
206987	MAZ	MDK	-5329517	5329517	2543.7	105945348840563
19774	HOXD3	ARX	5329298	5329298	0.0358781	144451710932998
306132	PDX1	SCG2	-5323725	5323725	1.8815e+08	572549664032204
65148	IRF1	COX4I2	5318878	5318878	0.205184	146878560564934
327127	TFDP2	SLC3A2	-53182483	53182483	0.721099	141420054065837
79534	CTCF	DIRAS3	53143382	53143382	3375.82	104716208922022
167296	FOXP1	IGFBP5	53132147	53132147	3.09801e-05	175089177764337
79584	NFIL3	DIRAS3	53126473	53126473	1.69568	137706559922878
217060	RFX6	MT3	5309834	5309834	2.60689e+06	758387681770782
101873	NFIB	ENPP2	-53030286	53030286	0.629017	142013378387068
217078	USF2	MT3	53015336	53015336	1.33613e+07	687415255716849
79476	KLF11	DIRAS3	-52999362	52999362	14743.2	983140740728508
20272	ATF3	ASB9	-5294683	5294683	14466.9	983962518947484
54313	ZEB1	CFAP61	52936964	52936964	0.00067075	171734393298358
38363	E2F3	CALB1	52920498	52920498	14.9172	128263138192713
259569	NR4A2	PCSK1N	52916702	52916702	1.01129e-06	199951237696976
55632	RORC	CHGB	52876696	52876696	3.75953e+06	742486658401617
74808	KLF7	DACH1	5282894	5282894	7.62318e-07	201178639240049
290883	SOX5	RBP2	-52749857	52749857	610.071	112146193874566
366622	NEUROG3	THRB	-52743744	52743744	1.10676	139559459667069
13654	E2F5	ANXA2	-52739076	52739076	1120.84	109504552897778
103102	GLI2	ERO1B	-5271079	5271079	99094.2	900395155178172
192636	NR4A2	LGALS2	52705374	52705374	910.017	110409506618009
20252	MYB	ASB9	-52702557	52702557	2.40369	136191213130384
324720	ASCL2	SLC30A8	52680172	52680172	6753.19	10170491144206
55759	BHLHA15	CHIA	52602533	52602533	2.06859e+06	768432514312641
346156	THRA	ST3GAL6	52551758	52551758	6.88721	131619569553851
55430	EGR2	CHGA	-52550856	52550856	1206.58	109184444289924
139692	ETV5	GPX3	52492063	52492063	144.688	118395672170065
328999	CDX2	SLC7A2	-524719	524719	0.00184622	167337162643834
39145	CDX2	CALML4	52466244	52466244	13.5455	12868205053232
55616	CREB1	CHGB	52459378	52459378	5.21726e+06	72825574917458
39201	ETV1	CALML4	-5244769	5244769	0.196703	147061894342063
105790	NKX6-1	ETV1	-52389134	52389134	7498.8	101250083846103
20236	TEAD3	ASB9	52333545	52333545	4.42368	133542167083166
217129	EGR2	MT3	-52314844	52314844	2368.83	106254652454607
319065	HEYL	SKAP1	5228368	5228368	2568.58	105903065523349
65105	PATZ1	COX4I2	-52265532	52265532	1.11611	139522936480245
296534	RORA	RGS4	-5223189	5223189	4143.35	103826479115654
103860	ETV5	ESM1	-5221592	5221592	686.451	111633907681491
138319	NFIX	GPR160	52212935	52212935	0.000118352	179268243974317
37109	XBP1	CACNA2D1	-52204274	52204274	0.0177094	157517960730429
137852	USF1	GPR137B	52183732	52183732	198.999	117011488694083
138350	NR4A2	GPR160	52169584	52169584	1.62493e-08	217891663995159
100447	CEBPA	EMB	5213631	5213631	0.0019545	167089635699471
13643	RARA	ANXA2	52130215	52130215	140.47	108524167877214
65392	ASCL2	CPB2	52088566	52088566	7910.21	101018122121489
306042	SMAD9	SCG2	52079454	52079454	7525.01	101234926742824
276376	KLF6	PPP1R1A	52062098	52062098	0.0682413	141659524182749
380746	PAX6	UPF3A	5201965	5201965	0.0138624	158581616899823
288511	KLF10	RARRES2	-52011654	52011654	0.00211663	166743542838016
103904	NR3C1	ESM1	5194836	5194836	68.8458	121621222745951
282811	ELF4	PTN	-519415	519415	0.00179449	167460589556603
253206	ARX	PAPPA2	51839862	51839862	35.8131	124459584740022
180425	NR4A2	KCNK16	51778305	51778305	0.921417	140355436664292
218101	PAX6	MTMR7	51774748	51774748	0.000109604	179601743420786
202434	FEV	MAP2	51766783	51766783	0.412335	143847498667133
261762	NFIX	PDX1	51718567	51718567	990062	800433764664636
55834	ZEB1	CHIA	-5170255	5170255	1.21505e+08	49154042751671
13546	TCF7L2	ANXA2	51690616	51690616	1.08472e+08	596468053447013
207041	GLIS2	MDK	-51671524	51671524	3.23977	134894851689321
35633	JDP2	CA14	51543757	51543757	7.38218e-09	221318155702197
13617	SPI1	ANXA2	51510923	51510923	11.5679	129367460307353
302314	NEUROG3	RUNX1T1	51460482	51460482	0.677741	14168936392536
137865	ETV3	GPR137B	-5143414	5143414	5.51009	132588412841718
25145	ELF4	B2M	51430795	51430795	0.000161332	177922793631942
177197	ZNF704	JUNB	-5136005	5136005	3196.4	949533936289974
198541	NR2F6	LSAMP	51305942	51305942	167.17	11776841227622
13629	TGIF1	ANXA2	-5129755	5129755	182785	873805974164165
378056	ELF1	TXNIP	5128165	5128165	625.406	112038381491696
218464	NR2F6	MTSS1	51266607	51266607	355.51	114491481719095
112548	LMX1A	FEV	51233813	51233813	963.607	110161002172386
13594	ARNT	ANXA2	5122627	5122627	1277.22	108937333750053
13205	BBX	ANXA10	51212195	51212195	0.128743	148902764825947
174274	KLF3	ISL1	51185902	51185902	7.01759	121538120577999
103131	TCF12	ERO1B	51172886	51172886	1.30986e+06	788277428798463
282240	KLF3	PTGER3	5113265	5113265	15.7813	128018575233925
39207	NFIA	CALML4	-51088963	51088963	8.92805	130492431669481
327083	NR1H4	SLC3A2	-5105261	5105261	220.465	116566603235641
139497	GRHL2	GPX1	-50847363	50847363	0.00222524	166526224208931
55837	RORA	CHIA	-50839346	50839346	240526	861883821033712
139484	NFE2L2	GPX1	5081456	5081456	555.304	112554690841819
370505	NFIX	TMEM176A	-50788328	50788328	0.0016019	167953634588085
309741	ELF4	SELENOM	-50783627	50783627	6.46035	131897437185131
306057	XBP1	SCG2	50734125	50734125	3.7063e+06	743105988755046
14551	ASCL2	APOBEC2	5072484	5072484	0.00243292	166138722023412
206963	PAX6	MDK	50671473	50671473	123663	890775975536891
109771	DNMT1	FAM162B	50665475	50665475	1804.44	10743656395953
55399	ZNF281	CHGA	50648514	50648514	1551.46	108092594027738
74749	THRB	DACH1	-50604586	50604586	4.40634e+06	735592193858479
282776	MAZ	PTN	-50583854	50583854	8361.02	100777407837991
252184	GATA6	P2RY14	-50519615	50519615	2670.58	105733948300882
259672	E2F3	PCSK2	5039313	5039313	0.0664646	151774094002799
126033	SOX9	G6PC2	-50281346	50281346	2839.52	105467546284902
252215	RORA	P2RY14	5025282	5025282	6.09724	132148667052458
55373	E2F1	CHGA	-5023578	5023578	1.26767e+08	589699285935509
60076	TCF21	CLU	-50227318	50227318	0.143325	148436772827635
32542	STAT1	BTBD17	5020747	5020747	0.014255	158460332568269
377905	RORA	TUSC3	-50190926	50190926	4.55668	133413510464666
378074	RARG	TXNIP	-5015901	5015901	618.9	112083793328739
180246	STAT1	KCNK16	5015167	5015167	0.0143607	15842823990356
79601	KLF6	DIRAS3	5013699	5013699	4.48638	133481041518416
317632	RFX6	SIM1	5011607	5011607	0.0171113	157667175865145
103095	SMAD5	ERO1B	5008898	5008898	904.327	100436745946793
59902	STAT1	CLU	5008335	5008335	0.00521911	152824032825567
37185	CREB1	CACNA2D1	5007089	5007089	2.93127e-05	185329447498246
37082	ASCL2	CACNA2D1	-50036192	50036192	379.696	114205639161583
70040	HOXB2	CRYBA2	5001804	5001804	8833.19	100538826025538
101761	BBX	ENPP2	5001296	5001296	0.438414	143581150931043
282781	HNF4A	PTN	-5000983	5000983	16.1694	127913064978344
74740	NR1H4	DACH1	49997237	49997237	2242.61	106492455998956
37127	CREB3L2	CACNA2D1	-49909078	49909078	0.0139819	158544332190289
100384	FOXO1	EMB	4990405	4990405	0.000876608	170571948146651
370764	FOXO1	TMEM52	4983548	4983548	0.0132635	158773428345235
55436	ETV1	CHGA	-49821198	49821198	1.19136e+08	592395834980787
369843	ARX	TMED3	49783785	49783785	22.5519	126468173775206
217094	ARNTL	MT3	-4978102	4978102	0.217138	136632647869455
139532	USF2	GPX1	497463	497463	0.246815	146076282707272
217141	ETV6	MT3	4972568	4972568	202381	869383131771258
285486	PROX1	RAB26	49673963	49673963	12589.5	98999919074033
55434	PROX1	CHGA	-4962309	4962309	1.83368e+09	473667616679173
306763	TFDP1	SCGN	49568113	49568113	2.14568e+07	66684342265496
20242	E2F5	ASB9	-4953966	4953966	1488.67	98272004902218
55746	BBX	CHIA	49525965	49525965	18118.6	874187488191598
282806	NFE2L1	PTN	-49519125	49519125	93.5549	120289332398979
103838	NFIX	ESM1	49512617	49512617	11780	892885355477566
327140	RORC	SLC3A2	-49469702	49469702	39.4085	124044101031835
103867	GATA6	ESM1	-4946759	4946759	79330.5	91005600629882
377238	MEOX1	TTR	-49451593	49451593	163111	878751642862094
225383	SOX5	NEGR1	49450573	49450573	25.5237	12593056606979
167365	SMAD9	IGFBPL1	-49435448	49435448	15.4068	128122864179003
55580	SP3	CHGB	-4943075	4943075	5888.12	923002354457489
13583	IRX6	ANXA2	-49403764	49403764	0.0959209	150180868647869
327136	CDC5L	SLC3A2	49393382	49393382	456.163	113408801005643
134999	ELF2	GLS	49302306	49302306	0.023758	156241903650114
126837	RFX3	GADD45A	-49297508	49297508	3831.81	104165957729615
152807	ETV5	HIGD1A	-4927914	4927914	3968.16	104014106913915
117257	ZNF281	FOS	492634	492634	1.03492e+07	698509279493431
65130	NR2F6	COX4I2	4925491	4925491	140.618	118519598269552
346101	MYCN	ST3GAL6	49195465	49195465	6693.51	101743459611131
20192	NR2F6	ASB9	4917847	4917847	537.701	102694595248481
152729	NFYC	HIGD1A	49165253	49165253	2591.91	105863797161308
346149	RORC	ST3GAL6	-4915251	4915251	8016.73	1009600248059
13648	ATF6	ANXA2	-49145993	49145993	26967	956916803607291
100263	TGIF1	ELP4	-49144965	49144965	213.054	10671510201835
327147	NR4A2	SLC3A2	-4895654	4895654	13039	98847551030596
47542	ELF3	CDA	48929587	48929587	0.30939	145094940222624
126101	NKX2-3	G6PC2	-48882753	48882753	61306.3	921249513127695
65436	TGIF1	CPB2	48882015	48882015	299.912	115230064743062
14431	DNMT1	APLP1	488783	488783	0.00032216	174919280786013
57735	E2F2	CITED1	-48836205	48836205	6991.7	101554173712279
343036	LMX1A	SPINK1	48834443	48834443	0.00401417	163964045782789
208958	PAX6	MEIS2	4880367	4880367	5087.09	102935306906605
259725	LIN28B	PCSK2	48762716	48762716	2984.28	105251600168342
126005	TGIF2	G6PC2	-4864393	4864393	3468.32	104598808683694
282763	FOS	PTN	-4856457	4856457	897922	804676132767005
306772	TGIF2	SCGN	48549384	48549384	5.01949e+07	629934002011328
377875	KLF5	TUSC3	-48521582	48521582	0.490551	143093158049292
20215	CREB3L2	ASB9	48497867	48497867	10539.2	997719206035338
296477	NR5A2	RGS4	48485305	48485305	0.365645	14436940708524
166998	DNMT1	IGFBP2	4846882	4846882	1856.18	107313803237277
377916	MYBL2	TXNIP	-4841438	4841438	274406	756160708817125
306533	MNX1	SCG5	-48401654	48401654	261.36	115827609272692
65582	TFDP2	CPE	-48398066	48398066	125516	890130125785381
73484	DNMT1	CXCR4	4837826	4837826	32.3571	124900299129771
198641	KLF10	LSAMP	-4836595	4836595	301.087	115213086024226
79558	HSF1	DIRAS3	48339695	48339695	8.2568	13083188080675
227338	MTF2	NEUROG3	48319537	48319537	320.187	104945969784065
180462	ETV1	KCNK16	48281077	48281077	3.59337	134444983046211
189932	RORA	KRT7	-48279688	48279688	180475	874358374713416
143408	SMAD9	GSTM3	48269242	48269242	1.25928	138998772331433
39242	RORA	CALML4	-48252888	48252888	48.2307	123166761739946
311916	ZEB1	SERPINF2	4823548	4823548	5.26685	132784492196292
112757	RORA	FEV	-48227705	48227705	0.00254508	165942993713527
88806	KLF4	DUSP1	4819016	4819016	0.0158074	158011406452849
55575	SP1	CHGB	48185624	48185624	2.56821e+06	759036888020282
20221	TP53	ASB9	-48181634	48181634	2560.96	105915976156053
309682	SMAD3	SELENOM	-48177358	48177358	371.47	114300760440064
177268	EGR2	JUNB	48119612	48119612	6.74884e+06	717077115072939
306149	PKNOX2	SCG2	-48084963	48084963	0.0387536	154116878062423
217089	ETS1	MT3	48084013	48084013	32.1363	1249300389338
103075	ATF1	ERO1B	48077833	48077833	29.3703	11532091736322
377975	ARID3B	TXNIP	48063807	48063807	0.00766529	161154714367608
377979	E2F1	TXNIP	48060656	48060656	85691.1	906706405631656
2477	MECOM	ACTC1	4802078	4802078	5.85429	132325255585022
55544	ZNF304	CHGB	-479549	479549	25715.4	958980752118624
306864	KLF7	SCGN	4794367	4794367	6982.81	101559698373097
225541	NFIA	NEGR1	-47922116	47922116	44.5801	123508585202599
151844	RORA	HHEX	4791601	4791601	1.2717	138956162226313
139602	PATZ1	GPX3	-47915373	47915373	155074	880946108187452
324881	MEIS3	SLC30A8	47885366	47885366	16.9975	12769614119585
167079	RORC	IGFBP2	-4787548	4787548	47.9512	123192007087944
139686	GLIS2	GPX3	-4784809	4784809	102.254	1099032074319
139572	NFIB	GPX1	-4780887	4780887	446.797	113498900024877
259572	FOSB	PCSK1N	-4779812	4779812	32.659	1248599713785
192819	NEUROG3	LGI4	-47759935	47759935	0.0494106	153061799361474
65547	E2F1	CPE	-47685225	47685225	44158.5	935498556600702
369616	JUNB	TM4SF4	476627	476627	1.24922e+07	690336229635993
137840	ETV2	GPR137B	4763811	4763811	421.687	113750098846019
55422	NR2F2	CHGA	-4754819	4754819	13.9554	128552570140747
65512	SMAD9	CPE	47542885	47542885	913.502	110392906484932
306806	BBX	SCGN	47506325	47506325	2116.9	867430063603646
127662	NR4A2	GALP	47411557	47411557	2.1801e-05	186615226390029
139562	NFIX	GPX1	-4740333	4740333	4.48658	133480843067885
126139	FOXA1	G6PC2	-47389008	47389008	3.38784e+06	747007767684668
369398	VAX2	TM4SF1	47367074	47367074	16.2114	127901797623262
13618	ZBTB2	ANXA2	47367014	47367014	37.9917	124203109952994
13285	GATA6	ANXA10	-47336385	47336385	0.218109	146613272860009
79583	NR4A2	DIRAS3	4732566	4732566	4218.02	10374891353949
204084	RORA	MAST4	473222	473222	5.22159e-09	222821972473049
198518	PATZ1	LSAMP	-47310993	47310993	16.2618	127888301021856
238877	PLAGL1	NPTX2	47277573	47277573	0.012248	159119364039802
217104	E2F5	MT3	47195725	47195725	4068.42	10390574042141
174238	GATA4	ISL1	-4716666	4716666	305642	851478767191789
207028	VEZF1	MDK	4713435	4713435	31.1821	125060944815365
253205	CUX1	PAPPA2	4712748	4712748	0.00048064	17318179820353
139570	CEBPD	GPX1	4706983	4706983	59.4101	122261399193191
13638	KLF13	ANXA2	-47061417	47061417	754.738	111222037289687
60072	NR4A2	CLU	47041904	47041904	110.222	119577305350889
259422	RFX6	PCSK1N	-4703811	4703811	1.19856	139213392020441
20299	JUNB	ASB9	47031116	47031116	1.75784e+08	575502035045084
306608	NR2F1	SCG5	-47004033	47004033	18.2966	127376294642198
57741	HSF1	CITED1	4699731	4699731	258.488	115875595008423
370454	THRB	TMEM176A	46994437	46994437	0.656429	141828124309611
329060	ETV1	SLC7A2	-46940096	46940096	1.7682e+07	675246916188512
13596	NRF1	ANXA2	-46928447	46928447	953748	80205662469243
290243	FOXP1	RBFOX1	-46874847	46874847	0.00022538	176470842044563
20190	ATF1	ASB9	4680313	4680313	20.344	126915628294564
167069	NR3C1	IGFBP2	46766896	46766896	0.184223	147346571738325
285412	NR1H4	RAB26	46647113	46647113	6015.53	10220726307171
13566	TBX2	ANXA2	4661133	4661133	4.29774e+07	536675951545772
38383	ETS1	CALB1	-46611212	46611212	34.4414	124629192788303
377297	ZNF169	TTR	-46599526	46599526	2.99712e+06	652329551455984
55648	HOXD3	CHGB	-46581116	46581116	3.34341e+08	447581077389044
291050	IRF8	RBP2	46579514	46579514	0.00179798	167452142822625
210053	XPA	MEST	46574462	46574462	1.68225	137741100846284
306832	SOX13	SCGN	46502262	46502262	7.88455e+06	710322328310895
369506	SEBOX	TM4SF1	46494603	46494603	97.7771	120097628259862
13550	PPARG	ANXA2	464557	464557	9146.02	903876776722183
2472	NFATC1	ACTC1	46453454	46453454	467.416	113302967117593
298756	THRB	RNF152	464106	464106	138.416	118588134237567
75612	RFX3	DCDC2	-46354987	46354987	1.24069	139063368645968
329036	NR3C1	SLC7A2	46339493	46339493	2.49788	136024280229436
74764	KLF9	DACH1	4629937	4629937	17.7083	127518242705251
327107	ZNF281	SLC3A2	46280358	46280358	0.447959	143487620781144
291029	ETV5	RBP2	-4619841	4619841	0.759893	141192477337188
306161	FOSL2	SCG2	-46170425	46170425	1375.77	10861454403698
259575	BCL11B	PCSK1N	-46078328	46078328	16.0464	127946226913299
217035	BHLHE41	MT3	-46049494	46049494	5.12623	132902021630286
372210	ETV1	TNIK	-46027314	46027314	11.7777	129289379750181
343091	MEIS2	SPINK1	-46018716	46018716	56.3794	122488795798148
103188	KLF5	ERO1B	-45969233	45969233	223472	865077622188207
37996	ELF4	CADM2	459449	459449	0.00543971	162644246092645
139710	KLF10	GPX3	4589727	4589727	1.0571e+07	697588455433933
122838	SOX5	FOXP1	45867145	45867145	1.95684e-06	18708445483943
126127	MITF	G6PC2	45839645	45839645	208.476	116809444688282
167100	KLF10	IGFBP2	45808896	45808896	223827	865008720453667
55655	RARG	CHGB	45801	45801	159320	879773017167043
70026	ZNF410	CRYBA2	4576531	4576531	6.70397	131736676853739
348828	ETS1	STMN3	-4575732	4575732	0.00522761	162816969445576
55416	E2F2	CHGA	-45751605	45751605	7.52144e+07	612369881169757
306464	NR2F6	SCG5	-45747343	45747343	334483	847562594432864
309708	CREB3L2	SELENOM	-45724865	45724865	10724.9	996960852233864
37183	TFDP2	CACNA2D1	45704212	45704212	0.302061	145199048109129
252098	RFX6	P2RY14	-45666233	45666233	546.177	1126266677506
253207	ELF4	PAPPA2	45643434	45643434	6.88458e-07	191621224336856
259776	CREB5	PCSK2	-4563495	4563495	97731.5	900996563035188
210058	PLAGL1	MEST	4559544	4559544	2.04297	136897387312855
397348	JUNB	ZFP36	4557202	4557202	4.4264e-06	193539497002412
59923	PAX6	CLU	45551486	45551486	25.8313	125878543361629
372064	FEV	TNIK	-45533083	45533083	0.00149874	168242726416785
276209	PATZ1	PPP1R1A	-45499798	45499798	10.9113	129621236396191
20188	NR4A3	ASB9	-4549832	4549832	9.3195	130306075264295
155353	NFYC	HMGN3	45486704	45486704	11.924	129235796148336
137911	MTF2	GPR137B	-4544089	4544089	3.8977e+07	640919174391462
75703	RORA	DCDC2	-45412995	45412995	13.7865	128605468535475
55686	SEBOX	CHGB	-4538833	4538833	1.41664e+08	584874081430951
285513	PAX4	RAB26	4530376	4530376	5.09496	132928589184417
126982	ASCL2	GADD45G	45301434	45301434	1.39502e-06	188554187966732
377909	PBX1	TXNIP	-4530058	4530058	2.66016e+09	457509264214676
348876	ELF3	STMN3	-4529611	4529611	0.098436	15006846177703
70035	ZNF467	CRYBA2	4526208	4526208	33.6697	124727605404721
103831	E2F2	ESM1	-45244493	45244493	32.9136	124826241856406
55672	IKZF3	CHGB	45212235	45212235	0.0115717	159366037080949
217018	NR1H2	MT3	45211345	45211345	1.33738	138737454229021
103152	ETV4	ERO1B	45165226	45165226	871.978	110594943134648
348898	KLF6	STMN3	4515852	4515852	0.000648294	17188227942915
192660	RORA	LGALS2	-45146454	45146454	878.836	110560920411281
149889	TCF4	HEPACAM2	4511652	4511652	1.47514	138311671890739
34864	RFX6	C4BPB	4510194	4510194	0.334076	144761550192361
346146	ELF4	ST3GAL6	45100115	45100115	0.00398644	163994142799151
370512	ELF4	TMEM176A	45097906	45097906	73.122	121359517045083
377761	RFX6	TUSC3	45077745	45077745	110.373	119571375418417
210264	ETV1	MEST	4506747	4506747	27.4412	125615962311659
13743	E2F6	ANXA2	-45028802	45028802	34883.3	94573821073034
70006	HOXB3	CRYBA2	4502238	4502238	5.06825	132951421417272
13709	KLF5	ANXA2	-44992432	44992432	200704	869744319758835
88107	PAX6	DRAP1	44974115	44974115	0.0108435	159648320851994
137839	KLF15	GPR137B	-44968907	44968907	761.413	111183798610874
268696	HOXB2	PLAGL1	44958252	44958252	0.141021	148507153368876
239031	ETV1	NPTX2	449462	449462	152.205	118175700807089
55812	GATA6	CHIA	-4492178	4492178	1381.15	10859760119866
74716	PATZ1	DACH1	-44914525	44914525	0.550808	142590001525657
306822	NFATC3	SCGN	-44903565	44903565	267340	857293618055048
225508	NFIX	NEGR1	-44893898	44893898	61.5559	122107305951895
55427	CREB3	CHGA	-44869345	44869345	53718.5	926987586036196
13567	NR1H4	ANXA2	-4486762	4486762	2.19573e+08	56584203591009
206994	USF1	MDK	44842407	44842407	10410.9	998251016463199
302199	NEUROD2	RUNX1T1	44840995	44840995	70.8052	121499347819686
47447	NFATC1	CDA	-4484011	4484011	0.0026883	165705219670133
189968	FOXN3	KRT7	44828966	44828966	2.65163e+07	657648767643754
55578	MAFK	CHGB	-44827335	44827335	244655	861144672819012
285498	KLF5	RAB26	-44780742	44780742	0.0763529	15117174369958
76823	MEIS2	DCX	44771783	44771783	0.149844	148243593607013
173987	NR4A2	ISG12(A)	44702098	44702098	8.22864e-07	200846721745165
306558	MYB	SCG5	4468953	4468953	486902	831255823029958
329018	NEUROG3	SLC7A2	-4467862	4467862	76144.5	911836135756267
167067	NR2F2	IGFBP2	44677317	44677317	0.00707155	161504856172852
13605	MECP2	ANXA2	-44674356	44674356	656894	818250470347682
261757	E2F2	PDX1	-44671718	44671718	2.83719	135471113176643
259564	FOSL2	PCSK1N	-4466761	4466761	10.0846	129963433807815
103211	KLF6	ERO1B	-44651747	44651747	6.59244e+07	618095388863714
306784	ZSCAN30	SCGN	4464473	4464473	3.00546	135220893976322
306632	ETV1	SCG5	44612173	44612173	1.64117e+06	778484681687664
319094	IRF7	SKAP1	4456224	4456224	2.53662	135957437860496
352451	HOXD3	TAGLN3	4454195	4454195	25949.9	958586512387097
373028	MTF2	TOX	44540938	44540938	3.2398	134894820279538
179471	RORA	KCNJ11	444368	444368	0.384574	144150201104319
300293	SOX5	ROS1	44419754	44419754	18.8675	127242858923245
235431	ISL1	NKX6-1	-44415623	44415623	0.32136	144930084630321
166923	ETV1	IGFBP1	44405486	44405486	869.92	110605207999723
13589	E2F7	ANXA2	4436043	4436043	6.39668e+06	719404510026062
217069	ETV2	MT3	4431497	4431497	1.10478	13956724361405
13317	RORA	ANXA10	-4428042	4428042	0.000574491	172407170345987
276342	ELF4	PPP1R1A	44206604	44206604	0.00291958	165346801875455
65182	TFDP2	COX4I2	44190526	44190526	3669.04	104354472491569
55418	TFDP2	CHGA	-44158764	44158764	224526	864873303823868
337923	RFX3	SOX5	44108078	44108078	1.3175e-07	208802483262602
13802	FEV	ANXA4	44098675	44098675	5.10268	132922015582181
178217	SMAD9	KCND2	4409098	4409098	0.54689	142620996375969
57664	TFDP1	CITED1	44056524	44056524	85267.2	906921811040905
55790	ETV4	CHIA	44050153	44050153	17351.4	976066431440351
369433	ARX	TM4SF1	44033762	44033762	0.82699	140824997336582
198644	PPARA	LSAMP	44032805	44032805	80.7561	120928244582406
306793	FOXN2	SCGN	43990906	43990906	7.02363e+07	615343808335263
282771	ETV2	PTN	439804	439804	27.1763	125658091012243
132583	GATA6	GHSR	-43941934	43941934	0.016892	157723200722156
139616	E2F8	GPX3	-43912508	43912508	3199.42	104949285682886
155390	IRF3	HMGN3	43909386	43909386	0.0494019	153062560808753
20292	MEIS3	ASB9	43882534	43882534	2802.12	105525135472748
65567	SP3	CPE	438781	438781	31.9284	124958230799934
294734	RORA	RFX3	4387154	4387154	0.221018	146555730833619
70037	BHLHA15	CRYBA2	-4384679	4384679	1.38828	13857522591308
103146	ETV3	ERO1B	-4383011	4383011	459.867	113373678693093
259547	ATF3	PCSK1N	-43816444	43816444	46.3436	123340098697552
126116	POU2F3	G6PC2	-43809768	43809768	11273.4	994794418799421
306497	MYCN	SCG5	-43804344	43804344	5.9925	122223919077806
261660	SOX5	PDX1	-43766398	43766398	9.76005e+06	701054806477283
39153	NFIC	CALML4	4376068	4376068	0.094066	150265674826389
352380	E2F3	TAGLN3	-4375852	4375852	258.609	115873571333355
13570	EGR1	ANXA2	437576	437576	136201529742792	386581801463232
20261	CREB3	ASB9	4373111	4373111	803.22	11095165743511
299652	THRB	RORA	43683648	43683648	185.286	117321578222117
37890	NEUROD1	CADM2	-43670148	43670148	0.028654	15542814518631
20219	FOS	ASB9	-4364426	4364426	2.60886e+06	758354841400552
252094	ISL1	P2RY14	43616425	43616425	107.696	119678022312206
165415	LMX1A	ID1	4361242	4361242	0.532887	142733650363371
180318	HOXB2	KCNK16	43601107	43601107	0.405388	143921289991881
306796	E2F4	SCGN	4359362	4359362	8.98135	130466583699531
65563	SP1	CPE	-43564934	43564934	12.8474	128911849562913
55510	ATF1	CHGB	-43562554	43562554	195331	870922837515484
182268	TCF12	KIAA0408	4356249	4356249	9.75628e-06	190107157893918
379512	NFE2L2	UCHL1	-4350868	4350868	95.535	120198374426953
13555	ZSCAN30	ANXA2	4346142	4346142	74.2884	111290788995256
13818	PAX6	ANXA4	43431662	43431662	2.14762	136680423729556
60007	NEUROG3	CLU	-4341815	4341815	4.75039	133232708107289
189988	ETV1	KRT7	43401405	43401405	2596.44	105856216878431
139662	CTCF	GPX3	4339826	4339826	39142.7	940734881550046
100338	ZEB1	ELP4	43377332	43377332	181096	874209076633213
74807	ESRRB	DACH1	43374654	43374654	0.210363	146770299725678
65460	ELF4	CPB2	43347843	43347843	0.0285283	15544724742143
259606	KLF4	PCSK2	-4326852	4326852	232524	863353174523193
145380	SMAD9	GULP1	4326722	4326722	0.0115767	159364150032943
55623	CREB3	CHGB	-43266676	43266676	488480	831115312242235
309739	KLF3	SELENOM	43248616	43248616	444581	835204900100863
306847	SOX11	SCGN	-43218423	43218423	716946	814451383808187
103127	HNF4A	ERO1B	-4321112	4321112	3.02939e+06	751864520601999
306442	MYBL2	SCG5	-43205857	43205857	47293.8	932519589979337
73417	KLF3	CXCR4	4319462	4319462	1.47214e-05	18832049958994
20262	NFYB	ASB9	4310967	4310967	4.82403	133165902151554
250699	ETV1	OTULINL	43104816	43104816	16.072	12793929459572
306232	STAT1	SCG3	43054476	43054476	5.40183e-06	19267459028459
65520	ZNF704	CPE	-4305229	4305229	960.481	110175112999241
103106	BBX	ERO1B	43010995	43010995	5.47462e+06	726164622813563
218473	NR1H4	MTSS1	4300515	4300515	0.0365284	154373694760232
14696	ETV1	APOBEC2	42996626	42996626	0.0561888	152503505993506
140837	RORA	GRIA3	42992692	42992692	0.0222432	156528034277926
377287	TFEB	TTR	42974934	42974934	8809.66	100550410858867
103891	CREB5	ESM1	-42973954	42973954	0.190111	147209935562024
2318	SMAD9	ACTB	-42951733	42951733	801.665	110960070683213
103129	TGIF1	ERO1B	-4293759	4293759	248633	860444102181851
262204	GATA4	PEG10	4293604	4293604	268.358	115712859641623
88956	FOSB	DUSP1	42926297	42926297	6396.53	10194055760525
369595	ELF1	TM4SF4	42922832	42922832	5110.97	102914967735294
13788	ZNF704	ANXA4	-42884324	42884324	0.025409	155950126175174
352433	ARX	TAGLN3	42877886	42877886	4.21969	133747195604297
276345	RORC	PPP1R1A	-4284828	4284828	4.27498	133690658308323
65133	STAT1	COX4I2	42766042	42766042	32153.9	949276589816164
206949	ZNF704	MDK	4274121	4274121	1999.11	106991630923069
299324	CDX2	ROBO2	-42737152	42737152	0.512647	142901812469125
377738	FEV	TUSC3	4272898	4272898	3301.94	104812303829587
299180	ASCL2	ROBO2	42725045	42725045	402099	839566672768323
377719	KLF11	TUSC3	-42718526	42718526	0.0811315	1509081071918
192680	PLAGL1	LGI4	42682648	42682648	4.7729e-07	203212179785638
13653	IRX4	ANXA2	42658564	42658564	91734.7	903746656439087
261768	CREB3	PDX1	4265841	4265841	1.25359e+06	790184602162991
13691	ESRRB	ANXA2	-4265744	4265744	1319.01	108797516004956
259500	NEUROG3	PCSK1N	-426139	426139	4.06865	133905491877817
65162	CTCF	COX4I2	42592105	42592105	23978.3	962018230942567
306800	FOXO1	SCGN	-425802	425802	1.80882e+09	474260370601739
65558	MAF	CPE	42564876	42564876	1580.74	108011395460105
376539	NKX6-1	TSHZ1	42545747	42545747	0.000604902	172183147853451
25050	STAT1	B2M	425344	425344	2203.19	106569481386414
261716	HOXB2	PDX1	4251187	4251187	1.85657e+07	673128757879887
47570	ETV1	CDA	42495742	42495742	48596.6	931339380767342
377991	BHLHA15	TXNIP	-4248709	4248709	30.4325	125166626961614
306519	ETS1	SCG5	-42484857	42484857	2.8287	135484133006386
285379	PATZ1	RAB26	-4248251	4248251	0.0158447	158001148070865
137889	CREM	GPR137B	42466242	42466242	1476.64	108307265292804
377331	PKNOX1	TTR	42457182	42457182	23123	963595508412346
418531	PAX6	ZNF428	424048	424048	6.57512	131820960918046
306518	TGIF1	SCG5	4240053	4240053	22548.2	964688798821668
348770	SMAD9	STMN3	4240013	4240013	0.0113565	159447557327067
377248	HOXB8	TTR	4239157	4239157	4.50501e+06	734630447200314
100271	CDX2	ELP4	-4237975	4237975	101.208	119947857137953
259419	HES1	PCSK1N	-42376064	42376064	81.452	120890980379093
294659	MNX1	RFX3	42346917	42346917	5.26786e-06	192783655686362
325685	PAX6	SLC37A4	42344023	42344023	0.0196667	157062675665005
228706	FOS	NFE2	-4228429	4228429	3.18054e+07	649749858076911
74801	KLF3	DACH1	-4228011	4228011	18.3071	127373810594821
126071	CDX2	G6PC2	-42270318	42270318	1.75458e+07	675582746260621
377478	SP8	TUBB2B	4223959	4223959	0.00105867	169752383686791
166978	MYBL2	IGFBP2	-4222704	4222704	11.624	12934642867689
79503	THRB	DIRAS3	-4222298	4222298	1.52737e+06	781605512474647
207000	SP1	MDK	4222203	4222203	0.165769	147804966666956
167017	GLI2	IGFBP2	42193636	42193636	5636.89	102489605112226
174193	SMAD3	ISL1	-42184737	42184737	166210	877934306731814
105945	ETV5	ETV1	4217072	4217072	0.458924	143382589086643
306799	FOXK1	SCGN	-42151693	42151693	118.929	11924710861391
55344	NR4A3	CHGA	42100955	42100955	6.13479	132122003056867
139676	ETV4	GPX3	-42086642	42086642	1755.24	107556641969875
373009	RORA	TOX	42086165	42086165	9.43679e+06	702517557787918
309729	ATF6	SELENOM	42066313	42066313	594.325	112259758758857
151716	TCF7L2	HHEX	-4206441	4206441	1.46584	138339121343334
13631	ZNF281	ANXA2	-4205259	4205259	9.2294e+07	603482661000855
167142	SMAD3	IGFBP5	42042196	42042196	7901.79	910227458231992
299766	TCF12	RORA	4202632	4202632	0.00131197	168820763778504
152675	TFDP1	HIGD1A	41953	41953	2521.7	105983074158526
202089	THRB	MAP1B	-41945484	41945484	0.0028798	165406377118203
282247	RORA	PTGER3	4192428	4192428	1.06373e+06	797317014683144
306456	BCL11A	SCG5	-41919407	41919407	150028	882382806884062
244589	PAX6	NRXN1	4190346	4190346	0.00240473	166189339270016
61009	NKX6-1	CNTN1	41880224	41880224	1.0416	129823000928839
37194	CREM	CACNA2D1	41860856	41860856	0.00947432	160234517512921
13946	FOXN3	ANXA4	-41843932	41843932	2.17407	136627259288508
152793	NKX2-3	HIGD1A	-418254	418254	63245.2	919897275829613
126103	HSF1	G6PC2	41792642	41792642	6096.38	102149278525058
55490	PPARD	CHGB	-4175609	4175609	327.247	114851246914011
348802	HES1	STMN3	-41752703	41752703	35.9273	124445755166043
377305	CREM	TTR	41742854	41742854	557550	725371641173687
137863	KLF13	GPR137B	-41721318	41721318	2.63001	135800427941381
257492	NR1H4	PCDH9	41715447	41715447	1708.97	107672665102421
20189	SIX6	ASB9	41675705	41675705	1889.48	872365766450723
74727	TCF7L2	DACH1	4165808	4165808	3086.83	105104869000774
55748	ELF2	CHIA	4164343	4164343	5.07011e+07	629498292773332
309742	NFATC4	SELENOM	4163679	4163679	659.873	111805399054383
377410	NFIC	TUBA4A	41635375	41635375	1.12089	139504378264685
377277	HNF4A	TTR	4162781	4162781	6.15939e+07	621046251711254
227311	ETV5	NEUROG3	41627046	41627046	31037.9	850810781081898
101854	NFIX	ENPP2	-41618887	41618887	4.64925	133326173603496
25156	IRF7	B2M	41583594	41583594	35880.4	944514332337538
39134	ETS1	CALML4	-41553155	41553155	0.000326143	174865915423674
174213	PHF1	ISL1	41543074	41543074	97812.8	900960441939389
299518	FOXP1	RORA	41487347	41487347	0.0821434	15085427228531
380547	RORA	UNC80	41419175	41419175	0.00763111	161174125111029
306175	MEIS3	SCG2	41395824	41395824	35.1548	124540151575432
306475	SOX9	SCG5	-41391462	41391462	641369	819289205796355
13639	LEF1	ANXA2	41375857	41375857	28.6181	125433590350233
37132	NRF1	CACNA2D1	41362822	41362822	352.838	114524244694907
378002	SP1	TXNIP	41357394	41357394	527.121	102780897718431
54193	NKX2-2	CFAP61	41357208	41357208	37.3295	124279483042674
167450	EGR2	IGFBPL1	4135591	4135591	0.0889222	150509899229736
103156	E2F2	ERO1B	-41341957	41341957	2899.99	10537603529912
20206	EGR3	ASB9	-41339893	41339893	13931.6	885599915932911
306855	NFATC4	SCGN	41339524	41339524	455.985	113410497869362
306609	BCL11B	SCG5	-41317366	41317366	13.138	128814700971325
137876	NFE2L3	GPR137B	41316267	41316267	18162.2	974083262533674
139598	TFDP1	GPX3	41179948	41179948	801.425	11096137319008
139649	RFX2	GPX3	41143503	41143503	25654.3	959084053522278
327142	ZNF385D	SLC3A2	4113193	4113193	23.578	126274926317802
59901	DNMT1	CLU	41090444	41090444	21.6001	126655433885533
37909	PAX6	CADM2	410866	410866	11891.8	992475227793331
329392	BBX	SLC7A8	41065022	41065022	11.1344	12953332234591
100259	MAF	ELP4	41025404	41025404	2.58922e+06	75868303544474
306121	FOXA2	SCG2	-40963277	40963277	13935.6	985587383275985
77469	MEIS2	DDC	-40925186	40925186	0.806849	14093207873335
285375	ETV1	QSOX1	40908236	40908236	6.51807	131858809816123
282212	TCF12	PTGER3	-4088894	4088894	461364	833595663103894
324829	BACH2	SLC30A8	-40884364	40884364	20.5629	126869149958545
60036	ARX	CLU	40827796	40827796	268.598	115708979964908
180734	SOX5	KCNMA1	4082361	4082361	81.0429	120912849871349
334010	HOXB2	SNAP25	40812552	40812552	0.420617	143761129510933
259787	NR3C1	PCSK2	40765464	40765464	34.2227	124656857209263
235782	XBP1	NME2	40764123	40764123	612.817	112126691665517
346137	TFDP2	ST3GAL6	-4076301	4076301	900.278	11045623438237
299203	NKX6-1	ROBO2	40751163	40751163	6371.84	919573532965355
143544	CREB3	GSTM3	4074895	4074895	0.001349	158699889129677
299435	PAX4	ROBO2	-40735766	40735766	2.7435	135616948239056
235747	PLAGL1	NME2	40735073	40735073	1105.3	10956521489775
103140	KLF12	ERO1B	-40724646	40724646	274797	85609872649682
167166	STAT1	IGFBP5	-40718876	40718876	2941.98	105313595993344
135114	RORA	GLS	40702406	40702406	0.864653	140631580037768
369573	LMX1A	TM4SF4	40699642	40699642	255905	759192093649478
100216	NR2F6	ELP4	4067264	4067264	2.91417	135354851819483
306840	GATA2	SCGN	-40664475	40664475	6.94013e+07	615863236693273
103096	THRB	ERO1B	4058119	4058119	2.16519e+07	666450373869181
65521	MAFF	CPE	-4057958	4057958	6.62969	131785066768598
306612	PRDM5	SCG5	-40573742	40573742	934.457	110294405660327
167170	NR1H4	IGFBP5	-40572353	40572353	0.174998	137569676014781
37073	RORA	CACNA1D	40557936	40557936	0.333938	144763346188305
57775	ETV1	CITED1	-40554367	40554367	542866029984496	326530733361023
177287	FOXN3	JUNB	-40549114	40549114	2143.02	106689746433475
261674	NR1H4	PDX1	-40526774	40526774	8.34632	13078505086531
167060	E2F2	IGFBP2	-40515725	40515725	5972.3	922385858341078
65612	MTF2	CPE	-40511124	40511124	314.558	115022997314714
291052	KLF10	RBP2	-40417343	40417343	1.19216e+06	79236663276743
207039	ELF4	MDK	-40412333	40412333	500.818	11300319794723
261643	MYBL2	PDX1	-40405456	40405456	0.00119927	169210817235704
261789	GATA6	PDX1	-4039709	4039709	419804	837695362520803
327054	POGK	SLC3A2	40350594	40350594	0.00651494	161860893327444
276309	CDX2	PPP1R1A	-4031378	4031378	0.016804	157745882435647
134978	PAX6	GLS	-4031317	4031317	0.0600166	152217289618077
174189	ZFP64	ISL1	40295642	40295642	0.105153	149781774733802
352487	MEIS2	TAGLN3	-4027924	4027924	38.8362	124107632924447
167412	KLF9	IGFBPL1	-40269308	40269308	3702.26	104315327554873
227290	LIN28B	NEUROG3	-402631	402631	4.37459e+06	735906247808583
73406	HEYL	CXCR4	-40261418	40261418	9.87251	130055726187194
13595	ELF5	ANXA2	4023709	4023709	0.0397719	154004236571071
348846	ETV4	STMN3	-4023238	4023238	0.0300821	155216917174581
378043	NFYB	TXNIP	4021779	4021779	718886	814334024356625
377264	FOXS1	TTR	40213387	40213387	2736.3	10562836713788
134627	FOXP1	GLIS3	40175084	40175084	2.07638	136826933147573
25063	PAX6	B2M	4017467	4017467	667.067	111758306443386
370439	NR2F6	TMEM176A	-40155306	40155306	0.0220075	156574295060359
328916	NEUROD1	SLC7A2	-4013409	4013409	1693.46	107712257672997
100329	NR2F1	ELP4	-40124655	40124655	0.204614	146890652139073
100244	HLF	ELP4	40116638	40116638	0.704061	141523895673302
13548	ZBTB7B	ANXA2	40116336	40116336	12845.5	989125044107566
174215	NR1H4	ISL1	40101267	40101267	485601	831372009507634
55667	FOSB	CHGB	-4008881	4008881	5.86342e+08	523184925454405
78839	RFX3	DEPP1	-4008659	4008659	927286	803278613967814
20209	SMAD5	ASB9	4003328	4003328	3451.56	104619840354983
282803	TFDP2	PTN	4002773	4002773	15871.3	979938769566937
299375	NR3C1	ROBO2	40001962	40001962	17346	976079944192539
143425	HOXB3	GSTM3	39965514	39965514	147.652	118307593339731
22871	RORA	ATF4	-3993963	3993963	4.8038e-08	213184153353971
218523	ETS1	MTSS1	-399132	399132	2.32575	13633436948499
377333	SCRT1	TTR	3989955	3989955	21.4581	126684085650041
139674	RFX1	GPX3	-3987666	3987666	21.9183	126591932026416
369570	NFIC	TM4SF4	39875697	39875697	1.19818e+07	6921479700993
38749	ETV1	CALCOCO2	-3985455	3985455	9.88038	130052263220119
379696	KLF5	UCHL1	-39845	39845	2.47743	136059986456142
132510	FOXO1	GHSR	39827153	39827153	0.835592	140780055080902
306083	FOS	SCG2	39820995	39820995	887994	805159002902476
139635	E2F7	GPX3	39819308	39819308	14714.3	983226010797987
79602	RORA	DIRAS3	-3980132	3980132	60961.9	921494132962696
37131	MYCN	CACNA2D1	-3979092	3979092	149.188	118262648222683
306511	HOXB2	SCG5	3978935	3978935	118086	892780172794333
306263	BBX	SCG3	39745815	39745815	2.4508e-05	176106925539979
155411	RORC	HMGN3	3972629	3972629	0.000847662	160717774949085
137895	ETV5	GPR137B	-3972141	3972141	4.58692e+07	633847889353319
377300	CREB1	TTR	-39714977	39714977	6.42513e+07	619211831061946
59910	EGR1	CLU	39706115	39706115	46326.2	933417289980978
13666	EBF1	ANXA2	-3969162	3969162	189267	872292400382576
366560	RORA	THRB	39690807	39690807	0.13559	148677733381216
73266	PBX1	CXCR4	-39655544	39655544	0.00292349	165340985847786
57726	E2F5	CITED1	-3965138	3965138	35.8213	124458588240703
139693	AR	GPX3	-39622005	39622005	0.00768457	161143805603667
283171	ELF4	PTPRD	3960434	3960434	6.38479e-08	211948533069246
55639	KLF7	CHGB	-3957391	3957391	0.48859	143110549964231
100297	CREB3	ELP4	39555557	39555557	0.0177665	157503988355286
210234	ELF3	MEST	39544135	39544135	1.70467e-05	18768358868321
55603	TP63	CHGB	-39530285	39530285	9.67393e+06	701439725952649
306100	NFATC3	SCG2	3951903	3951903	1.43196	138440681065798
174184	PPARD	ISL1	39491415	39491415	1157.83	109363542365737
117262	KLF13	FOS	3943194	3943194	0.0291175	155358465570312
141818	ETV1	GRM4	394111	394111	10.4188	12982182439002
285476	CREB3	RAB26	3940332	3940332	0.00435048	163614630941512
13869	MNX1	ANXA4	-39402362	39402362	1.66549	137784570468853
385712	PAX6	WLS	39401505	39401505	2.28696e-05	186407417369366
235497	ETV1	NKX6-1	-39375152	39375152	14.9213	128261927821695
282734	SMAD9	PTN	-39367758	39367758	5.33323e+06	727301008166788
293465	RFX3	REV3L	39335407	39335407	9.41719	12026078453627
369554	RFX2	TM4SF4	3933488	3933488	20061.5	969763565466337
343090	RORA	SPINK1	-39332137	39332137	268.816	115705455878513
377769	MYCN	TUSC3	-3931739	3931739	8.4178	13074801344542
137877	E2F2	GPR137B	-3931392	3931392	1.29809e+07	688669472137525
373008	RORC	TOX	39284077	39284077	562.486	112498883757834
74776	KLF12	DACH1	3928329	3928329	44.5737	123509211114792
324846	ARX	SLC30A8	-39276946	39276946	5.15779e+06	728753627532624
379511	MYBL2	UCHL1	-39257076	39257076	0.726168	141389628579506
79459	NR1H2	DIRAS3	39255224	39255224	18.4154	127348199216372
306139	HSF1	SCG2	3923917	3923917	155.491	108082939228168
57748	RORC	CITED1	-39215464	39215464	376366	842438985103726
253189	IRF3	PAPPA2	3919396	3919396	0.157863	148017198323822
35007	HES6	C6orf52	39192855	39192855	0.00277912	15556092079239
77265	SOX5	DDC	3918961	3918961	13.9615	128550693836768
325692	RFX6	SLC37A4	-39177794	39177794	0.150241	148232119721275
206952	DNMT1	MDK	3915646	3915646	29838	95252299039092
13688	RORC	ANXA2	-391117	391117	3.57781e+07	644638300942906
300404	ARX	ROS1	-39099842	39099842	342291	846560431669276
13522	NFATC2	ANXA2	-3906916	3906916	1.29774e+06	788681339470886
377837	CEBPA	TUSC3	39068967	39068967	4.49834	133469473891752
164420	EGR1	HSPH1	39067123	39067123	0.423801	143728376494982
178317	MYB	KCND2	3903853	3903853	55.2939	122573231186362
55349	JDP2	CHGA	-39025195	39025195	15247.5	881680172118219
154984	FOXP1	HMGCLL1	-39015435	39015435	0.0884494	150533053211487
288422	TCF3	RARRES2	-38999617	38999617	2202.75	106570344698287
137846	MAZ	GPR137B	-38994055	38994055	2.85668e+08	554413840422387
73471	MEIS3	CXCR4	38988784	38988784	17705.6	975188841280733
74777	RARA	DACH1	-3896535	3896535	11.4164	119424691968322
103721	XBP1	ESM1	38958564	38958564	4271.92	103693768201454
290963	CTCF	RBP2	38952723	38952723	1402.54	108530848693258
138312	HEYL	GPR160	38945507	38945507	0.361601	144417699941655
3004	ZNF704	ACVR1C	38934726	38934726	1490.58	108266434209873
283532	FOXO1	PTPRN2	38933273	38933273	0.7238	131403813170835
217162	MZF1	MT3	3893174	3893174	212.515	116726108213859
324857	SRY	SLC30A8	-38924716	38924716	1386.02	108582291015987
117316	ELF3	FOS	-3892337	3892337	166770335499751	37778811975502
55461	FOSB	CHGA	-3889318	3889318	4.68944e+06	632887863140744
211757	ETV1	MID1IP1	388659	388659	0.233073	136325083868074
13877	NFIC	ANXA4	3882193	3882193	0.00130506	168843694195635
257504	PAX6	PCDH9	-3881614	3881614	177.861	117499194243869
138364	ZEB1	GPR160	-38803175	38803175	162.102	117902128202732
55663	NR4A2	CHGB	3880229	3880229	4.27678e+09	436888273060857
209115	IRF8	MEIS2	-3877894	3877894	1108.99	109550723036724
13295	NR4A2	ANXA10	38774393	38774393	122.688	11911197576277
306141	FOXC1	SCG2	-38763206	38763206	297.055	105271624512113
174291	NR2C1	ISL1	38744137	38744137	1.64135	137847987165789
13925	ELF1	ANXA4	38739122	38739122	1.18385	139267041570545
332029	PLAGL1	SMIM5	-38732212	38732212	271.845	115656786713788
261737	MNX1	PDX1	38701076	38701076	298.815	105245974125859
329427	NKX2-3	SLC7A8	-38695626	38695626	1999.38	106991054683346
377253	ZNF331	TTR	38682457	38682457	894.109	10048609350814
87397	THRB	DPP10	38673434	38673434	56.2017	122502507021155
311894	NFIA	SERPINF2	-3862255	3862255	33.009	124813679572381
306792	EGR1	SCGN	-3861834	3861834	1.26596e+09	489757986584531
37964	MNX1	CADM2	38612165	38612165	370.492	114312217384099
259336	ASCL2	PCSK1N	3852588	3852588	2.96198	125284174932752
38420	ARX	CALB1	38519304	38519304	10381.4	998374261502043
177281	ELF3	JUNB	-3849996	3849996	137623963460253	386130593897523
65420	RFX6	CPB2	-38472667	38472667	0.0741647	151298028224455
380929	POU2F3	UPK3A	38462095	38462095	5691.69	102447589337226
298753	PAX6	RNF152	38452506	38452506	99.0356	120042085967469
88940	ATF3	DUSP1	38439196	38439196	129.811	118866869716548
390714	ZEB1	ZBTB20	38428824	38428824	9.7222e+07	60122355375474
377259	HOXA5	TTR	38408924	38408924	197535962268911	3704353827667
37943	HOXB2	CADM2	-3838726	3838726	15660.8	980518687776312
167347	ETV1	IGFBP5	-383655	383655	153570	881369388904776
103130	ETS1	ERO1B	38356185	38356185	7.03218e+06	715291009747402
283490	PLAGL1	PTPRN2	38353115	38353115	369695	843215594816037
306434	KLF4	SCG5	-38339652	38339652	470889	832708149060538
306494	E2F1	SCG5	-38330395	38330395	1289.92	108894357571804
337982	FOXP1	SOX5	3833013	3833013	1.87825e-07	207262477461647
378089	MAX	TXNIP	38313396	38313396	4.71899e+07	632615107646695
306047	MAFF	SCG2	-38306493	38306493	325.354	114876439116763
209000	SPI1	MEIS2	-3830324	3830324	4.85292	133139967651661
192583	ZNF16	LGALS2	-38292974	38292974	228.128	116418218801997
259364	TCF7L2	PCSK1N	-3828406	3828406	8.6522	13062873248417
117219	NR2F6	FOS	-3827732	3827732	2.66237e+09	457473092628027
300420	FOXP1	ROS1	38248643	38248643	0.013957	158552066468231
228685	JDP2	NFE2	3822157	3822157	68.78	121625376607102
268785	ZEB1	PLAGL1	38197957	38197957	2936.88	105321131796139
38467	PAX4	CALB1	-3817002	3817002	0.000313972	155031094450876
126141	FOXA3	G6PC2	-38142093	38142093	75944.5	911950345677521
252170	RORC	P2RY14	38136896	38136896	1357.11	108673854887236
152796	NFYB	HIGD1A	38117375	38117375	1365.08	108648418276152
20244	TP63	ASB9	-38110174	38110174	196382	870689779083782
372079	PAX6	TNIK	38107786	38107786	30.3621	125176680118919
276250	PBX3	PPP1R1A	-3810531	3810531	17.1342	127661368336761
259764	NR4A2	PCSK2	38104575	38104575	41855	937825216364586
327073	NFATC1	SLC3A2	-38079545	38079545	6973.2	101565676061199
167002	NR1H4	IGFBP2	-38069453	38069453	154257	881175411061236
13591	BBX	ANXA2	38069077	38069077	1.7292e+07	676215388661287
252141	LMX1A	P2RY14	-3806024	3806024	0.589065	142298367142971
306875	CIC	SCGN	-38021673	38021673	705.753	111513474993937
143545	ELF4	GSTM3	38013455	38013455	0.228298	146414975293278
74733	ZNF704	DACH1	38011067	38011067	5262.1	102788406115435
101833	NEUROG3	ENPP2	-38010497	38010497	1.63302e+07	67870085905023
285432	MECP2	RAB26	38009454	38009454	9.43595e-05	180252141817404
377508	ZNF704	TUBB2B	38004905	38004905	38.6114	124132848217506
139621	NR2F6	GPX3	-3799625	3799625	5490.85	102603605648263
117566	RORA	FOSB	37958924	37958924	1.86566e-05	187291667371896
38437	GATA6	CALB1	-37957102	37957102	25406	959506347263095
377884	NR2F1	TUSC3	-37932295	37932295	6.4403	131910937364831
286121	MEIS2	RAB3C	-37923697	37923697	0.00411588	163855373070297
13680	CREB3	ANXA2	37902895	37902895	489753	831002327409895
178285	TGIF1	KCND2	3788721	3788721	0.19841	147024358213078
103750	CREB3L2	ESM1	37866406	37866406	0.016424	157845203917271
137874	PLAG1	GPR137B	-3785797	3785797	234.57	116297280594402
209110	FOXN3	MEIS2	-37850477	37850477	698.885	111555945353993
94513	RORA	EFNA5	37849173	37849173	0.000549976	172596558796658
299414	NR4A2	ROBO2	-378447	378447	130.165	118855071557883
139588	FOXN3	GPX1	-37834525	37834525	75331.8	812302160698684
282757	SMAD5	PTN	37820015	37820015	2044.52	106894094535143
244560	SOX5	NRXN1	-37779123	37779123	36.0839	12442685943007
309726	KLF12	SELENOM	-37757438	37757438	14301.2	984462650486291
74798	HSF1	DACH1	-3774833	3774833	0.0463255	153341803226296
55527	ZNF143	CHGB	37741072	37741072	160744	87938647369469
112822	ARX	FEV	-37740987	37740987	241332	861738448240388
244615	FOXP4	NRXN1	37735794	37735794	5.94575e-05	182257931486091
70087	KLF6	CRYBA2	-3772359	3772359	35125.6	845437685025619
309695	EGR1	SELENOM	-37708424	37708424	189.907	117214586443532
167009	PAX6	IGFBP2	37692353	37692353	1.00822e+06	799644300128415
377499	TCF7L2	TUBB2B	-37671886	37671886	0.264414	135777159542474
379674	NFIB	UCHL1	-37640788	37640788	0.0467426	153302873208944
9449	RFX3	ALDOB	-3762975	3762975	299.411	115237315752005
100477	FOXN3	EMB	-37623324	37623324	0.0754557	151223081079349
140733	PAX6	GRIA3	3761459	3761459	969.75	110133401061854
103177	ESRRB	ERO1B	-3758157	3758157	21336.3	967088018114476
306834	RARA	SCGN	-37544973	37544973	256076	859163067709716
100306	PKNOX2	ELP4	-37540745	37540745	434.014	113624959962324
380817	NR4A2	UPF3A	3753533	3753533	3.25677	134872133039934
377915	NR1H2	TXNIP	-37513584	37513584	13012.8	988562922961516
306470	NR1H4	SCG5	37498817	37498817	272.778	115641912243651
306569	KLF3	SCG5	3748104	3748104	2530.77	105967467795221
306460	MAFF	SCG5	-37477896	37477896	3.79064	124212871291552
80	HOXB2	A1CF	37465386	37465386	0.221814	146540113106711
25094	HOXB2	B2M	3744985	3744985	743072	812896898437138
299284	E2F3	ROBO2	37422366	37422366	6.16133	132103252039581
55401	CTCF	CHGA	37403066	37403066	2.11165e+07	667537844433352
217137	ETV5	MT3	-37375756	37375756	272.557	115645425447862
145867	ELF1	H1-3	37375633	37375633	1.17974	139282133184971
65134	NEUROD1	COX4I2	37371643	37371643	5.416	122663210550788
327077	ATF1	SLC3A2	37343584	37343584	1706.06	10768004834805
101739	EGR1	ENPP2	37337914	37337914	6.84571	131645815069414
79573	ETV5	DIRAS3	37325095	37325095	1.39906e+07	685416520354354
152797	ELF4	HIGD1A	37300795	37300795	28.1012	115512754072021
352485	RORA	TAGLN3	-3728002	3728002	47.0042	123278629784013
387190	FOXN3	XBP1	-37275538	37275538	234.886	116291431485685
324754	TCF3	SLC30A8	-37274875	37274875	17503.2	975688369716542
234283	FEV	NKX2-2	3724051	3724051	0.95511	140199465536803
122860	RFX3	FOXP1	3722815	3722815	7.41354	131299746160233
262730	SOX5	PEX5L	3721081	3721081	0.0006659	171765910073283
133166	PAX6	GJD2	3720374	3720374	0.006727	16172178347547
141829	NR4A2	GRM4	37182216	37182216	20.9073	126797025224597
38333	STAT1	CALB1	37180096	37180096	19725.3	970497560180394
13194	PAX6	ANXA10	37167367	37167367	0.946713	140237814647844
306155	CREB3L4	SCG2	-37147194	37147194	344402	84629343218238
137882	HSF1	GPR137B	-37145555	37145555	9.88742e+06	700491694276731
9594	ELF4	ALDOB	37143063	37143063	19.3771	127127109345641
377918	PPARD	TXNIP	37138797	37138797	15.4181	118119699415112
167320	BCL11B	IGFBP5	-3713155	3713155	47.8928	123197299204592
78087	KLF6	DDIT4	37114367	37114367	0.000878706	170561562631694
363537	FOSL2	TFF2	3709486	3709486	2.03639	136911400102739
217150	NR2F1	MT3	-37094165	37094165	863369	806380362362788
57743	HEY1	CITED1	37085075	37085075	20249.9	969357688313971
377687	MTF2	TUBB2B	37074547	37074547	0.649302	141875532126457
282852	RORA	PTN	37061073	37061073	522671	828177164865746
74714	TFDP1	DACH1	-37038904	37038904	281.942	115498403161305
137783	PATZ1	GPR137B	3703323	3703323	4.76913e+06	732156106979125
137845	GMEB2	GPR137B	-3702502	3702502	18464.8	973365496367598
348780	ZNF704	STMN3	-3701635	3701635	2458.62	106093080042042
299277	MYCN	ROBO2	3699105	3699105	431.271	113652502385825
320834	ARX	SLC16A10	36990903	36990903	0.0296912	155273726307743
244732	ZEB1	NRXN1	36972046	36972046	88818.8	905149532835683
143405	ZNF75D	GSTM3	36938027	36938027	3.80511	134196327034033
266365	MAX	PIN1	3692886	3692886	0.0756873	151209768699658
306430	TFDP1	SCG5	36896225	36896225	255.131	11593236888515
55508	NR4A3	CHGB	36883503	36883503	2.11985e+08	56736941406551
149857	ONECUT2	HEPACAM2	36873262	36873262	4452.82	103513646312294
55554	HOXB5	CHGB	-36870964	36870964	1.80869e+07	574263578420464
262221	DMBX1	PEG10	36861666	36861666	65.4748	12183925791689
55562	SKOR1	CHGB	3684494	3684494	78677.1	910415190318223
75241	ELF3	DBN1	36843568	36843568	3.05022e-05	185156694211482
37083	SP8	CACNA2D1	36836103	36836103	0.000224982	176478524710016
146147	RORA	H2AC21	-3681428	3681428	33.4359	124757875165365
103148	E2F5	ERO1B	3681279	3681279	4.12463e+08	538461548947485
366463	FOXN3	THRB	-36811862	36811862	43.4637	123618734200086
151843	KLF6	HHEX	3679989	3679989	231241	863593429057895
218590	RARG	MTSS1	-3679518	3679518	0.046522	153323412789223
109743	KLF3	FAM162B	36789298	36789298	41.7816	123790151472543
327067	SMAD3	SLC3A2	-3678018	3678018	68547.9	916400577008161
20235	TGIF1	ASB9	-3675647	3675647	663900	717789756341891
369581	SOX11	TM4SF4	-3674598	3674598	1.0367e+07	698434664268401
306600	ELF3	SCG5	-36735084	36735084	1.07772e+06	796749592787879
127044	PAX6	GADD45G	36731567	36731567	0.00290465	165369064409956
259502	BACH2	PCSK1N	-36727786	36727786	2.70228	135682696922836
75143	TCF3	DBN1	3672268	3672268	6.63488e-05	181781669670694
307650	SOX5	SCN9A	3669761	3669761	2320.56	963440783357492
174218	MAFG	ISL1	-3665246	3665246	47.5515	123228356974489
100343	NR3C1	ELP4	36649678	36649678	50.6776	122951837951196
222834	PLAGL1	NAGS	3664479	3664479	0.0130983	158827856190139
55715	NR2F6	CHIA	-36638845	36638845	2.78033e+07	655590341404957
49108	ARX	CDH17	36623597	36623597	8.14274	130892293727127
309755	ETV6	SELENOM	3660939	3660939	1.8288e+08	573783390178978
286432	ARX	RAB9B	3660101	3660101	0.0166653	157781870250386
217036	E2F8	MT3	-36593277	36593277	23141.6	863560710321431
370517	NFIB	TMEM176A	-36589943	36589943	18.8761	127240878574096
47457	TCF3	CDA	36552973	36552973	744.418	111281831763327
109700	THRB	FAM162B	-3654046	3654046	1554.43	108084292805154
34833	NEUROD1	C4BPB	36484014	36484014	23.5755	126275383449475
13537	SMAD9	ANXA2	-36476176	36476176	3.64713e+08	543804856494941
55756	RFX2	CHIA	3647547	3647547	2.54871e+06	759368036385119
14575	ZNF704	APOBEC2	-36469273	36469273	0.000795919	170991311523618
306568	ELF4	SCG5	36455292	36455292	162.403	117894057406604
126972	ETV1	GADD45A	36451727	36451727	4868.71	103125862309825
217040	NR2F6	MT3	36438882	36438882	3.66033e+07	643647964647344
191192	ETV1	LDHA	36415346	36415346	2.69491	13569456347372
377954	BARX1	TXNIP	3638189	3638189	127466	889460567171703
218177	RORA	MTMR7	-3635986	3635986	7.61112e-10	231185512207727
203768	RFX3	MAST4	36357924	36357924	2.41741e-05	186166489480393
309701	ZNF543	SELENOM	-36350593	36350593	0.131094	148824169031205
865	DNMT1	ABCC8	3635026	3635026	0.00472369	163257189366825
192546	GLI3	LGALS2	36339838	36339838	501.499	112997303067902
129990	PAX6	GBE1	36320027	36320027	392.604	114060452215586
76844	SMAD9	DDAH1	3630239	3630239	0.0483476	153156253433219
380513	NFIB	UNC80	-362958	362958	0.0492921	153072229213737
869	NR1H4	ABCC8	-3628322	3628322	2.02596	136933701319965
117214	E2F8	FOS	-3626864	3626864	9.15299e+09	403843706326915
109480	PLAGL1	FAM155A	36265064	36265064	0.178365	147486902478583
324861	HOXD3	SLC30A8	-3626163	3626163	155.468	118083597950934
327133	HSF1	SLC3A2	36241077	36241077	373.692	114274861649464
55392	FOXK2	CHGA	3622568	3622568	6172.73	10209522506318
293635	ETV1	REV3L	3621298	3621298	7991.59	100973669414073
898	GLI3	ABCC8	-36209125	36209125	2179.66	106616122000087
306592	HOXD3	SCG5	-3619748	3619748	28752	954133140577914
20201	EGR1	ASB9	36187492	36187492	1.46741e+07	68334473615755
75664	CTCF	DCDC2	3616361	3616361	0.00186045	157303813242768
37960	CDX2	CADM2	-36158532	36158532	0.365237	144374248225589
88848	ATF4	DUSP1	3614718	3614718	2247.04	106483888409429
13580	SMAD5	ANXA2	36133837	36133837	15423.7	881181094076337
174201	E2F8	ISL1	36123265	36123265	823.301	110844414692135
429285	KLF7	ZNF609	36112193	36112193	0.00847856	160716778085531
377646	NFIB	TUBB2B	36108777	36108777	0.0580336	15236320246407
152764	SP3	HIGD1A	36081165	36081165	7144.57	101460236686064
294736	ETV1	RFX3	-36062736	36062736	662.329	111789260483647
198579	HNF4A	LSAMP	36050174	36050174	946.046	1102408762436
165591	LIN28B	ID2	36042828	36042828	270.868	11567242324815
259573	NR2F1	PCSK1N	-3603741	3603741	3.92073	13406633119228
65135	TBX2	COX4I2	-3600572	3600572	909706	804109873894333
228781	RBPJ	NFE2	3600426	3600426	0.0738061	151319078711906
37188	TCFL5	CACNA2D1	36002975	36002975	134.946	118698388446802
202064	TCF7L2	MAP1B	-35991147	35991147	0.00257825	165886746875941
167455	ELF1	IGFBPL1	-3598966	3598966	4529.88	103439133310575
324882	PPARA	SLC30A8	35975073	35975073	417.595	11379244439212
252216	NR3C1	P2RY14	35967927	35967927	0.348001	1445841989652
311809	FEV	SERPINF2	3595265	3595265	92.2929	120348316349602
227281	SOX11	NEUROG3	-35950564	35950564	1.7256e+06	776306095618999
387096	PLAGL1	XBP1	3593718	3593718	18639.9	972955692996769
112527	HHEX	FEV	-3587658	3587658	11464	994066551619742
152705	HOXB3	HIGD1A	-35874095	35874095	366.426	104360141941227
13543	BCL11A	ANXA2	35868976	35868976	3.34931e+08	547504489729917
149821	PAX6	HEPACAM2	35859045	35859045	2.17462e+06	76626170311628
138323	ARX	GPR160	3585769	3585769	24.6898	126074820054722
74818	NR4A2	DACH1	3585601	3585601	2927.03	105335730699282
282231	HEYL	PTGER3	-35854865	35854865	4.99183e+07	630174053634836
167453	SPDEF	IGFBPL1	35832506	35832506	1.03512	129850086464112
129979	XBP1	GBE1	35830583	35830583	0.0790749	141019614520437
369539	SOX9	TM4SF4	35818767	35818767	45458.3	934238677569735
100344	ETV1	ELP4	-3581469	3581469	3587.4	104452205394813
217145	RARG	MT3	3580312	3580312	1.41524e+06	784917048088228
266372	DNMT1	PIN1	3579443	3579443	3.65899e-05	174366387785958
37222	MTF2	CACNA2D1	35790674	35790674	2775.98	105565837261016
283531	PAX6	PTPRN2	35785817	35785817	211.89	116738891716985
282733	SMAD3	PTN	-35779674	35779674	10790.1	996697512823738
306049	ATF1	SCG2	3577905	3577905	2.57148e+06	758981688521349
13569	EBF4	ANXA2	-35755	35755	154.096	118122091068331
306884	MEIS3	SCGN	35743225	35743225	492698	830741893955054
139638	FOS	GPX3	-3573764	3573764	240533	861882584707266
377943	PBX3	TXNIP	3573451	3573451	1.04319e+07	698163580077501
110607	PAX6	FAM20A	3569908	3569908	0.0122838	149106656913963
35103	RFX6	C6orf52	35671335	35671335	2.22011e-05	186536247860628
152761	ETS1	HIGD1A	-3565619	3565619	90556.7	904307929320171
210093	STAT1	MEST	35650156	35650156	1584.17	980019714476637
206984	MECP2	MDK	35646513	35646513	548.475	112608433169684
55488	NR1H2	CHGB	3563983	3563983	7.21177e+06	714195791705364
259469	TCF4	PCSK1N	35638988	35638988	47920.3	831948086376028
9525	TCF4	ALDOB	3563381	3563381	440.486	113560681800723
377984	KLF15	TXNIP	-35605848	35605848	111397	895312678504227
103050	PATZ1	ERO1B	3560397	3560397	2.22146e+08	565336084896788
101366	THRB	ENO2	35602055	35602055	0.403876	143937520679005
146096	LMX1A	H2AC21	35600808	35600808	10929.9	996138498909347
290930	CREB3L2	RBP2	3557438	3557438	1.24951e+07	690326122113108
55816	TEAD1	CHIA	-35557862	35557862	1.39345e+09	485590707454037
139563	STAT3	GPX1	-35548057	35548057	3.38244	134707693837641
39222	NR4A2	CALML4	3551597	3551597	3.89721	124092458650142
285481	CREM	RAB26	35488766	35488766	53.7402	122697006808536
235265	PAX6	NKX6-1	35488047	35488047	0.00764529	161166061802118
174310	PPARA	ISL1	-35487775	35487775	221887	865386722966482
229571	FOXP1	NFIA	3546132	3546132	12.5468	129014656406958
324725	NFE2L2	SLC30A8	35459135	35459135	127170	889561363814512
103083	NR1H4	ERO1B	-3544984	3544984	1.65741e+08	578056900548271
296463	PBX3	RGS4	35440862	35440862	829463	808120320071489
139526	E2F3	GPX1	3542412	3542412	11.7883	129285471082208
198602	E2F2	LSAMP	-3541874	3541874	4379.54	103585712811564
167363	SMAD3	IGFBPL1	-35396744	35396744	1.2142e+06	791571095130722
324740	NFATC1	SLC30A8	-35386354	35386354	206.425	106852383402993
378012	MNX1	TXNIP	-35377637	35377637	573665	824134132113404
70080	TCF21	CRYBA2	-35374563	35374563	1.53578e+07	681367239014803
252097	CREB3L2	P2RY14	35366684	35366684	348.403	114579179468582
306590	MITF	SCG5	35356633	35356633	8.11429e+07	609074942964673
145775	SMAD9	H1-3	-3534711	3534711	1.07167	129699390061778
238981	NFIX	NPTX2	-3534387	3534387	18.2021	127398792889434
88973	JUNB	DUSP1	3532047	3532047	150384	882279800501222
259183	ISL1	PCSK1	3530896	3530896	2157.95	106659584375797
377295	MEF2C	TTR	-35305608	35305608	4.7941e+07	631929262500432
953	HEY1	ABCC8	35297453	35297453	1.94831e-08	217103429821165
218557	CEBPA	MTSS1	35287526	35287526	163.624	117861522096096
74805	PKNOX2	DACH1	-35278387	35278387	3676.48	104345680525303
377587	ETS1	TUBB2B	3524372	3524372	19.4336	12711446888272
126112	CREM	G6PC2	-35238765	35238765	19579.3	970820366131776
55370	FOXI3	CHGA	-35237387	35237387	73423.6	91341641086814
295157	ETV1	RFX6	35234872	35234872	0.0114451	159413800665376
263002	PLAGL1	PFKFB2	35234608	35234608	1.37367	138621165193525
73363	HOXB2	CXCR4	-3521732	3521732	6.18906e+07	620837532176005
55817	ELF3	CHIA	35210446	35210446	3.98994e+07	639903378380183
2563	ETV1	ACTC1	35207093	35207093	0.911438	140402728928693
377251	CDX1	TTR	-35201102	35201102	1.49838e+08	582437895792374
369605	FOXN3	TM4SF4	35198644	35198644	890500	805036616110064
182269	TCF4	KIAA0408	35193834	35193834	0.0753738	151227798306224
296404	NFIB	RGS2	-3519063	3519063	5.24693	132800950038604
218500	MYCN	MTSS1	-35166003	35166003	6.99842	131549997964042
259683	KLF9	PCSK2	35160076	35160076	76.4893	121163992339043
377316	SIX2	TTR	-35138153	35138153	49663.9	930395880961112
259664	CREB3L2	PCSK2	3513744	3513744	79983.6	909699905359573
103097	ZNF304	ERO1B	35135645	35135645	84.5609	12072830637381
37887	HOXB3	CADM2	-3512045	3512045	11468.2	994050348823357
25015	PBX1	B2M	-35114992	35114992	1.90118e+07	672097727808182
103181	ETV5	ERO1B	-350858	350858	512266	829050408013856
55443	ZNF385D	CHGA	-35078857	35078857	1.57222e+08	580348642414261
306808	NRF1	SCGN	-3506792	3506792	1.44289e+09	484076707919726
167077	EGR2	IGFBP2	34995556	34995556	33.2909	114776747099026
37988	LIN28B	CADM2	-34994964	34994964	50.2171	122991482817885
369267	NFATC1	TM4SF1	34991853	34991853	34.8154	124582288671148
225996	RFX3	NEUROD1	3498395	3498395	0.0318828	154964433131789
377638	CREB3	TUBB2B	3497389	3497389	73840.4	913170623910838
213075	PAX6	MLXIPL	34970198	34970198	91.0677	120406356998079
174175	TFDP1	ISL1	-3494442	3494442	1.18777e+07	692526698074199
198590	KLF12	LSAMP	34914523	34914523	130324	888497564567394
355931	RORA	TCF12	34884248	34884248	17.8604	127481080171857
100269	TFCP2L1	ELP4	-34876216	34876216	691.75	111600508123909
1001	RORA	ABCC8	34857616	34857616	1.14963	129394431124968
208977	NRF1	MEIS2	34823973	34823973	96.1665	120169761384786
217128	HES4	MT3	34810517	34810517	541.372	11266503825961
13727	KLF10	ANXA2	-3480834	3480834	2.38581e+08	562236350793718
19	SOX5	A1CF	34793362	34793362	0.164542	147837220028318
352482	SEBOX	TAGLN3	3478564	3478564	268927	857036581840421
422699	ASCL2	ZNF511	34779258	34779258	1.0149e-06	199935783302232
333135	KLF6	SMU1	3477129	3477129	101130	89951180206496
225560	NFIL3	NEGR1	34770846	34770846	9.2257	13035000556449
290968	MLX	RBP2	34760505	34760505	0.0180298	157440084312108
58321	HES1	CLDN10	3475453	3475453	19.6082	127075632757543
73359	GATA4	CXCR4	-34746476	34746476	0.158591	147997216832967
13616	FOXK2	ANXA2	-34735363	34735363	72.8664	121374727946847
38417	HSF1	CALB1	34691088	34691088	0.0723472	151405782500588
226072	SOX5	NEUROD1	34686383	34686383	4.52591	133442938985508
65498	MEIS2	CPB2	-34681357	34681357	84083	807529200697859
282178	TCF3	PTGER3	-34679923	34679923	6.88929e+06	716182535268231
100473	NR4A2	EMB	3467175	3467175	12.4836	129036616479899
155404	ARX	HMGN3	34665667	34665667	725.58	11139314423359
327123	LIN28A	SLC3A2	3466371	3466371	231.646	11635174727091
227326	NR4A2	NEUROG3	-34657594	34657594	1.05616e+08	597626929211292
377288	RFX1	TTR	34653716	34653716	2.70408e+08	556798008689134
136594	NFIC	GNAI1	34640398	34640398	0.0487766	153117886879837
55555	ETV2	CHGB	34639332	34639332	1.76884e+06	675231190007844
167059	HEYL	IGFBP2	-34632057	34632057	4.8781e+06	731174889390232
210631	TP73	MFAP4	3463102	3463102	203.316	116918286299123
209077	ELF1	MEIS2	3461253	3461253	0.00548685	162606772881837
138210	XPA	GPR160	34586262	34586262	1.32679e-05	188771978804412
192589	LMX1A	LGALS2	34577288	34577288	0.292544	14533809148299
259624	SMAD9	PCSK2	34567896	34567896	668.628	111748154512588
302239	DNMT1	RUNX1T1	34567356	34567356	0.000244162	176123223690102
139557	E2F2	GPX1	34562923	34562923	33927	946945443077313
174239	MAZ	ISL1	-34540333	34540333	3.03053e+06	75184808980327
210262	RORA	MEST	34538038	34538038	37.0063	12431724094741
38445	GTF3A	CALB1	34533307	34533307	35.7223	124470606736013
174186	ZBTB37	ISL1	34524884	34524884	593.369	112266754812354
100222	YY1	ELP4	-3449483	3449483	4578.98	103392309534845
55753	FOXJ1	CHIA	344705	344705	9.73318	130117453129705
259601	ETV1	PCSK1N	-34446873	34446873	405.08	113924591727416
152725	EGR3	HIGD1A	-3444358	3444358	1.12004e+07	695076555102716
103693	TGIF2	ESM1	-34432158	34432158	5.22946	132815434301
291054	MAX	RBP2	3441607	3441607	58.1208	122356684074187
37190	KLF3	CACNA2D1	-34351774	34351774	24286.8	961463047004334
13912	RORC	ANXA4	34350194	34350194	2.73573	125629272994671
13665	MEF2C	ANXA2	-3434454	3434454	63058	920025995462096
282235	NFIX	PTGER3	-3434199	3434199	2.86034e+06	754358191070691
296506	TFDP2	RGS4	34308407	34308407	2.9585e+06	65289279443493
252112	GATA4	P2RY14	-34304935	34304935	32.443	124888794230169
127639	RORC	GALP	34293972	34293972	0.00098452	170067755239816
214526	MYB	MPP3	34287397	34287397	0.992137	140034283422215
342957	MYBL2	SPINK1	3428151	3428151	0.00145033	168385328209374
139640	ELF5	GPX3	-34273863	34273863	368.13	114339988716249
306520	ZNF281	SCG5	-3426594	3426594	14564.9	983669338347169
137838	NRF1	GPR137B	-34258313	34258313	2.67281e+07	557303147656677
55646	CREB3L4	CHGB	342547	342547	768673	81142582268711
100497	ETV1	EMB	-34250133	34250133	209.35	116791263564278
268741	ELF4	PLAGL1	34241464	34241464	0.0773163	15111729062146
75696	KLF3	DCDC2	34238793	34238793	1564.41	10805648575811
100444	TFDP2	EMB	34233734	34233734	0.0299284	155239164305237
324808	SOX13	SLC30A8	34231845	34231845	90760.6	904210276981313
276300	ETS1	PPP1R1A	-3422588	3422588	3.11719	135062363282643
227181	TCF7L2	NEUROG3	-3422299	3422299	60730.6	921659246346686
300468	ETV1	ROS1	3421987	3421987	7379.8	101319556662183
217102	SP4	MT3	34206156	34206156	539.658	112678814895968
20284	NR2F1	ASB9	-3420588	3420588	439.445	113570950984776
194378	PAX6	LIMCH1	34198478	34198478	0.348929	144572628346359
137917	NR3C1	GPR137B	34171272	34171272	2.46609e+08	560799109608109
146059	NFYC	H2AC21	3415618	3415618	69.7495	121564590349648
218088	NEUROD1	MTMR7	34127798	34127798	0.864175	140633982940197
276258	MAFG	PPP1R1A	34110833	34110833	106.34	11973303669466
112753	PAX4	FEV	340739	340739	1.43392	13843474675369
290574	ELF4	RBFOX1	3406338	3406338	8.09315e-05	180918824821697
294557	PBX1	RFX3	3404137	3404137	20.0622	126976215466847
103174	PKNOX2	ERO1B	-34034632	34034632	407874	838947429255485
291151	HOXB2	RBP7	340186	340186	6.97193	13156647204087
209081	ZNF385D	MEIS2	34012973	34012973	0.844513	140733934816694
117225	FOXN2	FOS	34011453	34011453	1.04369e+09	498142784092461
357201	FOXP1	TCF4	3401018	3401018	794.657	110998204866783
378092	HOXB4	TXNIP	3400795	3400795	16240.3	978940629050687
205276	E2F2	MBD3	34007203	34007203	0.000151234	178203504164597
87385	RFX3	DPP10	-33993658	33993658	10.8474	129646749234741
152739	E2F1	HIGD1A	-3398829	3398829	1.47901e+07	683002782120049
105815	NR1H4	ETV1	33986848	33986848	297727	852618205011812
395235	PATZ1	ZEB1	-33972982	33972982	1.43788	138422762940696
55568	SKOR2	CHGB	33970043	33970043	0.0984667	150067106188847
55735	FOXK1	CHIA	-33947594	33947594	27.3822	115625315457691
300466	RORA	ROS1	33943314	33943314	46.6365	123312739928393
328868	ASCL2	SLC7A2	3393883	3393883	10.7024	129705189431112
99644	FOXN3	ELL2	33926837	33926837	0.00265988	16575137516385
288450	GATA4	RARRES2	-33925757	33925757	0.0385581	154138839305163
372208	RORA	TNIK	3391011	3391011	1.76102e-05	167542349253327
378047	HES4	TXNIP	33900645	33900645	13578.7	986714198930459
380392	KLF6	UNC5D	33891823	33891823	0.0037348	164277328910716
210048	KLF4	MEST	-33879276	33879276	6.28212	13201893878848
126086	FOXA2	G6PC2	-33874676	33874676	2.27125e+06	764373463512618
137867	VDR	GPR137B	3385064	3385064	0.295958	145287694045086
39149	MNX1	CALML4	-33839256	33839256	70.8825	121494610731098
377794	HOXB2	TUSC3	33836666	33836666	24.3838	126128984844461
306035	POU3F1	SCG2	-33835556	33835556	233.872	116310221579989
366549	KLF10	THRB	-33834346	33834346	1.62153e-05	187900749686518
65588	CREB3	CPE	338061	338061	12884.9	988991936560825
377496	KLF11	TUBB2B	-33803023	33803023	0.416566	143803157650621
74809	ELF1	DACH1	33778574	33778574	336.861	114725490358024
34996	ETV1	C4BPB	33744987	33744987	6.64595	131774429004466
9536	DMBX1	ALDOB	3373718	3373718	423219	837343466833144
302226	SOX5	RUNX1T1	33732228	33732228	12.1148	12916683052258
282768	ELF2	PTN	33727564	33727564	199751	869950997475586
65172	NFIC	COX4I2	3372742	3372742	158161	880090049665732
55518	ZBTB14	CHGB	-33723135	33723135	42.8927	113676170894755
379497	TFDP1	UCHL1	33709697	33709697	1099.37	109588567312093
242728	JUNB	NR4A2	33700343	33700343	0.709459	141490725582727
139567	NR3C2	GPX1	33695493	33695493	0.000362063	164412161446855
348896	MZF1	STMN3	33680495	33680495	0.0585542	152324422877937
259757	KLF5	PCSK2	-33658516	33658516	788124	810340528469367
372926	ZNF704	TOX	-33648167	33648167	7155.91	914533531431415
253228	GATA6	PAPPA2	-3362864	3362864	0.2903	145371534332374
79498	EGR3	DIRAS3	-3357414	3357414	24570	960959490106122
137881	LIN28B	GPR137B	33569258	33569258	122965796328457	391021567336995
302375	MTF2	RUNX1T1	33561382	33561382	11.187	129512876533193
291194	HEYL	RBP7	3356071	3356071	0.257285	1458958492107
217023	E2F6	MT3	33560377	33560377	41756.4	93792770941793
369562	TGIF1	TM4SF4	-33545043	33545043	1.18461e+07	692642506331475
165607	GATA6	ID2	33542987	33542987	0.070291	151531003567499
306843	RFX1	SCGN	3352239	3352239	3.51904e+08	545357542466153
13713	GTF3A	ANXA2	-33512723	33512723	74325.5	812886245219737
138251	PAX6	GPR160	33509664	33509664	1346.4	108708271819745
35233	MEIS2	C6orf52	33485044	33485044	213025	867156944674617
296447	NR1H2	RGS4	33468854	33468854	3.11378	135067118917899
38474	E2F6	CALB1	-3346657	3346657	6.85528e-05	181639747871724
89653	DNMT1	DUT	33456944	33456944	0.036334	144396865173311
49821	FEV	CDK5R2	33450894	33450894	6.34912e-05	181972867226516
73306	HOXB3	CXCR4	-3344439	3344439	512.785	112900647510602
55346	ATF1	CHGA	33440277	33440277	3.04268e+06	751674309126429
210203	FOXC1	MEST	33439152	33439152	1.44679e+07	683959467051595
117197	PATZ1	FOS	-33432268	33432268	2.63663e+07	657895131555636
99592	ARX	ELL2	33430368	33430368	0.0869831	150605649922691
103136	PAX1	ERO1B	-33426125	33426125	7278.16	101379785972037
379665	ELF4	UCHL1	334174	334174	1.84717	13733492186791
61084	E2F3	CNTN1	33409268	33409268	0.00232681	166332390973905
65620	MEIS2	CPE	33393472	33393472	3.07903e+06	651158658561175
57747	EGR2	CITED1	3338368	3338368	129702	88870530569427
369572	RFX1	TM4SF4	-3338356	3338356	776567	810982090725073
346130	RFX1	ST3GAL6	33376142	33376142	15517.4	980918165726582
51820	PAX6	CEL	-3337609	3337609	5.03918	132976398816482
1003	ETV1	ABCC8	-33372693	33372693	32213	949196878205319
285126	BBX	QRFPR	3336449	3336449	1.53535	138137923512128
329431	CUX1	SLC7A8	33360004	33360004	18948.2	972243260985139
13579	ZNF543	ANXA2	33348918	33348918	34.9133	124570096558787
372538	NFIB	TNR	-33313327	33313327	11.672	129328535052523
13695	NFKB1	ANXA2	33301827	33301827	3.9295e+08	540566236757588
217068	HEY2	MT3	3329416	3329416	118333	892689464149606
327125	E2F2	SLC3A2	-33272877	33272877	4.12265e+07	638482327763972
327155	PPARA	SLC3A2	33246607	33246607	95.8945	120182065254943
208936	DNMT1	MEIS2	33243302	33243302	15479.5	88102419317178
299466	RFX3	RORA	33242267	33242267	56.8622	122451760722552
312463	SOX5	SETBP1	33232693	33232693	51.8818	12284985097769
202180	ETV1	MAP1B	33231743	33231743	1.11218e+06	795382581834047
263553	ETV1	PGAP1	3321187	3321187	0.742369	131293804230925
35141	NR4A2	C6orf52	3319301	3319301	5.46587	1326234047041
65107	NFATC2	COX4I2	3318834	3318834	1261.06	108992632850955
16857	ARX	ARHGEF38	33187512	33187512	3.4958	134564531624293
145860	ARX	H1-3	33171736	33171736	11.103	129545604264344
35232	RORA	C6orf52	-33162978	33162978	24645.2	960826686385437
70051	KLF13	CRYBA2	-33162277	33162277	0.649364	131875117665564
155340	DNMT1	HMGN3	33154424	33154424	775.684	111103153147494
9658	HOXB4	ALDOB	33151623	33151623	2528.89	105970698583706
101929	NR3C1	ENPP2	33134006	33134006	0.757507	131206130833642
217157	PPARA	MT3	-33121746	33121746	1.32809e+06	787677376958102
73422	TP73	CXCR4	-33111915	33111915	68824.7	916225578722186
261760	MYB	PDX1	3311168	3311168	48998	930982136621882
35683	HSF1	CA14	-33110786	33110786	0.000102564	179890065658363
378097	ZFP14	TXNIP	-3310092	3310092	66.5873	121766084404405
72046	ELF2	CTSZ	33087377	33087377	625.558	11203732584567
255186	MEIS2	PAX6	33077948	33077948	0.0550855	152589627015663
432400	XPA	ZNF664	3305221	3305221	0.0107536	159684457132298
79515	FOXP4	DIRAS3	3304604	3304604	118430	8926539582977
87499	FOXP1	DPP10	-3302295	3302295	1969.38	10705669719771
103203	MEIS3	ERO1B	32994293	32994293	8.72245e+06	705936168397132
377839	NFIX	TUSC3	-32988485	32988485	46599.1	933162282250103
259513	MYB	PCSK1N	3298683	3298683	385.955	114134637126511
329430	NR3C1	SLC7A8	32975353	32975353	357006	844732463524379
174305	AHR	ISL1	-32975066	32975066	32242.4	849157291056698
236476	NEUROG3	NOL4	32957274	32957274	0.000335681	174740728049539
13874	IRF2	ANXA4	32950465	32950465	0.0161849	157908906966909
377642	EGR2	TUBB2B	32945935	32945935	5203.89	10283671756734
38317	REST	CALB1	3293304	3293304	72549.9	913936340403134
348887	KLF10	STMN3	-32925647	32925647	29.2537	125338189275838
65152	E2F1	COX4I2	-32925203	32925203	232.152	116342275953773
351714	NFIX	SYT7	-32909065	32909065	3.76812e-05	184238753145709
89657	RFX3	DUT	-32906227	32906227	1.89686	137219658528761
369851	RORA	TMED3	-3289654	3289654	0.0131836	158799663049879
225378	SMAD9	NEGR1	32888573	32888573	0.691093	141604637077664
369739	SMAD9	TMED3	32887407	32887407	1751.5	107565902602441
166838	NR1H4	IGFBP1	328558	328558	415.145	113817999308493
290961	ETS1	RBP2	-3285132	3285132	607486	821646393861971
387965	RBPJ	YBX1	32841537	32841537	564.44	112483820599859
306878	FOXN3	SCGN	-3284066	3284066	3.69241e+09	443269059643383
377533	ATF4	TUBB2B	32832786	32832786	3.53625e+06	745145729448328
174183	GMEB1	ISL1	32820735	32820735	276.498	115583081773901
126151	SIX4	G6PC2	3280581	3280581	9513.97	100216384338103
137799	SMAD3	GPR137B	-328047	328047	499867286769295	330114528421252
318964	SMAD9	SKAP1	32803755	32803755	0.178582	14748161903634
176791	RORA	JAZF1	3280194	3280194	0.0460529	15336743122259
167324	PRDM5	IGFBP5	32798417	32798417	30.2016	125199706567092
243497	PAX6	NRCAM	32798044	32798044	540.735	112670155557445
189955	ELF3	KRT7	32787856	32787856	11.6431	12933932704218
210071	KLF11	MEST	-32770768	32770768	1.69499	13770833098427
312510	NRF1	SETBP1	3275913	3275913	0.00113616	169445617860958
377977	E2F7	TXNIP	-32744475	32744475	2.17748e+09	46620455778355
252065	MEF2B	P2RY14	327424	327424	159.404	117975011914568
296462	NR2F6	RGS4	-3273961	3273961	5892.26	102297178706502
137914	ZNF311	GPR137B	-32737806	32737806	1.46802e-06	18833266941815
170888	NR2F6	INSR	3272496	3272496	97.4369	120112764334287
151814	EHF	HHEX	32714825	32714825	3.17479e+06	74982856362835
37122	SMAD5	CACNA2D1	32705635	32705635	0.0563582	152490427166169
206941	BCL11A	MDK	-32700922	32700922	188615	872442443396423
192613	RORC	LGALS2	3267938	3267938	15920.2	97980521443093
55530	HOXC5	CHGB	3267706	3267706	9.02854e+09	404438269572488
227348	RORA	NEUROG3	-3266062	3266062	1.38923e+06	785722490666162
103787	MEIS1	ESM1	-32653663	32653663	10.5915	12975041844386
109759	NR4A2	FAM162B	32645456	32645456	64379.8	919125021327689
100212	ZNF704	ELP4	32642815	32642815	25787.5	958859078991068
429193	NR2F6	ZNF609	3263071	3263071	0.0401942	153958366531306
310349	ETV1	SEMA6A	3262252	3262252	6483.19	101882110368318
37976	NEUROG3	CADM2	-3261473	3261473	34989.8	945605832301525
285518	RORA	RAB26	-32598328	32598328	2929.35	105332282496379
192649	PPARA	LGALS2	-3258745	3258745	7.91003	131018218856471
36874	THRB	CACNA1D	3258252	3258252	0.0449893	153468910292899
126050	ETV2	G6PC2	3257867	3257867	264.708	115772324751604
137298	HEYL	GPC5	32574665	32574665	2.31712e-06	196350514948377
217076	RFX2	MT3	32570854	32570854	114672	894054119046966
155337	ZNF704	HMGN3	-3256003	3256003	0.47291	133252215405664
14576	MAFF	APOBEC2	-3255679	3255679	0.00648231	16188269913727
47504	KLF12	CDA	-3255414	3255414	17.9805	12745198066689
369756	STAT1	TMED3	32553893	32553893	24.3754	126130482415503
206951	NR2F6	MDK	-32548137	32548137	4287.05	103678413765947
293617	FOXN3	REV3L	3252568	3252568	118.427	119265503022944
369515	ZNF384	TM4SF4	-32520458	32520458	168.04	117745876190309
290892	ZNF704	RBP2	-32501075	32501075	3.8772e+06	741148129863271
13623	ZNF667	ANXA2	32498874	32498874	329481	848216930938425
105889	MNX1	ETV1	-32494877	32494877	5.46353	132625269425216
51961	RORA	CEL	-32484077	32484077	13.3089	128758585691438
22625	EGR2	ATF3	32482013	32482013	0.0042241	163742658431045
837	PATZ1	ABCC8	-3247852	3247852	0.00306807	165131346216541
57693	E2F4	CITED1	32477587	32477587	0.148917	148270544571043
19793	SEBOX	ARX	3246878	3246878	702.384	11153425123638
306465	HOXB3	SCG5	32450482	32450482	144201	784103223479018
306807	NR5A2	SCGN	3244038	3244038	258777	758707450312219
206999	ZNF281	MDK	-3243931	3243931	57467	924058117615735
217148	NR4A2	MT3	32439213	32439213	236435618712436	362628709697432
13597	KLF15	ANXA2	-3239619	3239619	5591.62	102524621095623
209026	MNX1	MEIS2	3239551	3239551	282.654	115487442109716
179375	THRB	KCNJ11	32390866	32390866	1829.68	10737624897143
299227	NR2F6	ROBO2	3238886	3238886	22.1389	126548446346118
317627	THRB	SIM1	-32388814	32388814	0.167206	147767490156392
429199	YY1	ZNF609	-3238282	3238282	0.30376	145174697492963
379623	KLF12	UCHL1	32381035	32381035	0.333521	144768767168483
370452	PAX6	TMEM176A	32380454	32380454	15812	98010144712171
174272	TCFL5	ISL1	-32378316	32378316	6.30909	132000330416946
378023	NKX1-1	TXNIP	3237374	3237374	1639.04	107854105368657
56141	THRB	CHN1	32373637	32373637	0.00868416	160612723144286
137794	ZBTB37	GPR137B	32349233	32349233	2.11887e+07	667389500428366
174318	E2F6	ISL1	-3234558	3234558	29.9493	125236135221997
103903	RORA	ESM1	-32328658	32328658	4.59972e+06	733726813464598
306565	CREB3	SCG5	3232102	3232102	1.42289e+07	684682817026338
13561	DNMT1	ANXA2	-3229006	3229006	1.36689e+07	68642648787284
130065	ETV1	GBE1	32285314	32285314	2505.74	106010647195569
369742	SOX5	TMED3	-32283105	32283105	4207.55	103759707722049
79591	KLF10	DIRAS3	-32278143	32278143	5.15155e+06	728806170112447
55400	SP1	CHGA	-32277603	32277603	30169.3	852043509797474
20204	E2F4	ASB9	32270018	32270018	156.624	108051428820493
167084	ETV5	IGFBP2	-3226926	3226926	21112.7	967545558233894
25118	IRF2	B2M	32261733	32261733	1.89029	127234706861751
35083	ASCL2	C6orf52	-32255568	32255568	28.0253	12552449120937
25045	NR2F6	B2M	-32253757	32253757	14.3102	128443530852732
262890	MEIS2	PEX5L	32249972	32249972	11016.5	995795774386823
192736	THRB	LGI4	32247607	32247607	3.45503	134615477699936
248749	SMAD9	OPCML	32232475	32232475	0.000116375	179341403653095
377266	HOXB6	TTR	32217592	32217592	6.11059e+08	521391675358517
352334	TCF7L2	TAGLN3	-32212686	32212686	251423	859959431633904
329462	PPARA	SLC7A8	322071	322071	3.0493	135158004268185
235784	FEV	NME2	32199983	32199983	47.4026	123241976204477
184580	TCF7L2	KIT	32174442	32174442	0.0214689	146681907324134
429290	ETV6	ZNF609	32160107	32160107	54.1282	122665767018326
167419	MAFK	IGFBPL1	32156903	32156903	529.045	112765076674755
55802	EHF	CHIA	3214771	3214771	555948	825496576741296
55799	NEUROG1	CHIA	-3214369	3214369	8.99711e+07	604589718998555
309722	SP1	SELENOM	32139335	32139335	14961.2	982503250366762
60004	LMX1A	CLU	-3213795	3213795	0.0174542	157580988867722
217041	DNMT1	MT3	-32118686	32118686	1.37323e+08	586225581540431
259654	PAX6	PCSK2	32084905	32084905	1.40258e+07	685307140493922
279033	NR1H4	PRNP	32074884	32074884	0.000426988	163695842382465
348855	KLF3	STMN3	3207154	3207154	74.0698	121303585738642
306562	HSF1	SCG5	32070253	32070253	0.256744	125904999925093
207009	KLF12	MDK	-32048866	32048866	10401.9	998288778408075
76984	PLAGL1	DDAH2	-32048527	32048527	4.64156	133333356973994
300275	ASCL2	ROS1	-3203874	3203874	0.00283764	165470421247721
9430	SOX5	ALDOB	-3201079	3201079	265.358	115761676969055
103138	KLF13	ERO1B	-32001775	32001775	4.2487e+06	73717441843268
390625	FOXP4	ZBTB20	31975996	31975996	3.05471e+06	751502962149102
126087	LMX1A	G6PC2	-31975098	31975098	3.39907e+06	746863978208474
25277	PAX4	B3GAT2	31958584	31958584	5.37759e-09	222694122129858
192618	ELF1	LGALS2	319513	319513	109.368	119611097494602
13309	MEIS3	ANXA10	31950444	31950444	357.614	11446585990365
55761	SPI1	CHIA	3194826	3194826	0.43061	14365915759055
65505	ELK3	CPE	3194662	3194662	3735.18	104276882086349
167073	NR3C2	IGFBP2	-31942118	31942118	13.1608	128807171473842
79580	RARG	DIRAS3	-319395	319395	4.78873	133197796464865
74832	E2F6	DACH1	31936686	31936686	4.07953	133893893940475
244740	MEIS2	NRXN1	31924337	31924337	0.00121764	159144800136667
65479	NR4A2	CPB2	31923644	31923644	690715	816070095669448
103748	BCL6	ESM1	31918287	31918287	205.663	116868435663646
167025	ETV2	IGFBP2	-319157	319157	3.03116	135183913862636
112776	XBP1	FEV	-31912487	31912487	13364.9	987403435913455
225529	NFIB	NEGR1	-31907488	31907488	1.95892	137079830780109
47531	EHF	CDA	3188714	3188714	623.997	112048173086693
167393	UBP1	IGFBPL1	-3185536	3185536	4.19335	13377438854994
309677	ZBTB37	SELENOM	-31853475	31853475	139970	885396577918101
312433	ETV1	SERPINI1	31847063	31847063	385.591	114138730253515
127009	SOX5	GADD45G	-31846676	31846676	0.012715	158956838913129
369844	CREB3	TMED3	31846523	31846523	0.142735	148454697110585
380469	HNF4A	UNC80	31844612	31844612	0.388688	144103984544997
152804	ELF1	HIGD1A	31828802	31828802	3.39007e+08	546979190854873
861	ZNF704	ABCC8	3182381	3182381	53214.3	92739715797952
103819	IRF3	ESM1	3181889	3181889	51.385	112891633412421
218608	AHR	MTSS1	-31817924	31817924	15817.2	980087104046557
167117	PBX1	IGFBP5	31807162	31807162	700.404	111546516608
55621	HSF1	CHGB	-31805184	31805184	7.15462e+08	514541319841049
143576	KLF5	GSTM3	-3179309	3179309	0.00335504	164743021002668
100213	MAFF	ELP4	-3177783	3177783	58.2839	122344516043699
139679	VEZF1	GPX3	31762738	31762738	183962	873527072275043
65184	TBX3	COX4I2	-317397	317397	2229.61	106517720299978
291102	HOXB3	RBP7	31720962	31720962	0.484218	123149594010159
13944	NR2F1	ANXA4	-3171119	3171119	30436.2	951661003895718
211539	ETV1	MGST1	31701706	31701706	21346.7	967066936306763
283177	RORC	PTPRD	-31661473	31661473	0.0532156	152739607414417
217115	HEYL	MT3	-31651605	31651605	2.89823e+08	553786753727005
306438	MEOX1	SCG5	-31650625	31650625	6.78854	111682238913661
286626	KLF6	RABEPK	31640604	31640604	85059.4	907027789207019
255268	CDC5L	PAX6	31614985	31614985	1.09826	129592951596151
136554	PAX6	GNAI1	31589456	31589456	312.517	115051261833104
306593	ETV6	SCG5	-3158398	3158398	1786.34	107480368725087
37204	ETV5	CACNA2D1	3157811	3157811	717.933	111439160572824
100214	ATF1	ELP4	31569935	31569935	47.9539	123191761642523
2453	SP8	ACTC1	3155832	3155832	0.00248686	156043480668756
366823	XBP1	THYN1	3155374	3155374	0.00713072	161468668179899
65143	SMAD5	COX4I2	3154072	3154072	10336.3	998563286611515
306451	KLF11	SCG5	-315287	315287	15.9276	127978493848266
343092	ETV1	SPINK1	31528365	31528365	3477.15	104587771328935
324840	NFE2L1	SLC30A8	-31523377	31523377	2833.15	105477301695366
55670	NR2F1	CHGB	-3152224	3152224	3.92741e+09	440589355922118
285442	TGIF1	RAB26	-31504367	31504367	15032	982298299428694
387800	NR4A2	YBX1	31495653	31495653	0.376939	144237287920308
306082	CREB3L2	SCG2	314859	314859	63510.1	919715699104681
180255	EGR1	KCNK16	-31483177	31483177	0.492798	143073313656603
167349	TFDP1	IGFBPL1	-31478476	31478476	3214.32	104929110030975
348883	FOXN3	STMN3	-31477503	31477503	1022.83	109901948644253
55716	HOXA5	CHIA	31466804	31466804	841460	80749667228273
275303	FEV	PPM1E	-31465646	31465646	2.35178e-05	186286034127046
284936	HOXB2	QPCT	3146301	3146301	0.00508752	162934938032627
75641	MYCN	DCDC2	-31461373	31461373	356.869	104474909051384
218532	MNX1	MTSS1	-31456176	31456176	68.6947	121630764780564
101893	ELF3	ENPP2	-3145007	3145007	327919	848423407766088
244687	ELF4	NRXN1	3144766	3144766	5.47796e-08	212613810085398
387829	FEV	YBX1	31428743	31428743	1551.21	108093289162357
4611	ARX	ADGRD1	31428054	31428054	0.060621	152173766680775
329065	ETV5	SLC7A2	-31425938	31425938	0.0835062	140782813312211
139656	HNF4A	GPX3	3142396	3142396	6825.59	101658599742744
282258	ELF3	PTGER3	-31423744	31423744	45.4824	113421563092996
167476	MTF2	IGFBPL1	31418364	31418364	8.94699e+07	604832293925523
61165	ELF4	CNTN1	3140607	3140607	5.06189e-06	192956869808056
227331	NR2F1	NEUROG3	-31400632	31400632	176.668	117528409732832
306393	NR4A2	SCG3	31400464	31400464	0.0784663	15105316557912
100239	E2F1	ELP4	-31392258	31392258	14.3739	128424266012189
217123	HSF1	MT3	-31391993	31391993	16347.1	978655951062585
[truncated: 2 more rows]

## Sheet: Sheet3
Sheet3: Network scores of the TFs from Beta,0 and Beta,1
	degree_all	degree_centrality_all	degree_in	degree_centrality_in	degree_out	degree_centrality_out	betweenness_centrality	eigenvector_centrality	cluster
NEUROG3	44	7705779334500876	25	4.37828e+16	19	3327495621716287	30640	7019530380967558	Beta,0
TTR	47	8231173380035026	47	8231173380035026	0	0	0	6612978500526315	Beta,0
PAX6	64	1.12084e+16	2	3.50263e+16	62	1085814360770578	28470	7989766066319887	Beta,0
ANXA2	89	1.55867e+16	89	1.55867e+16	0	0	0	10	Beta,0
SOX5	38	6654991243432574	2	3.50263e+16	36	6304728546409807	10440	4760270744631907	Beta,0
CHGB	77	1.34851e+16	77	1.34851e+16	0	0	0	8458565298023392	Beta,0
ARX	30	5253940455341506	1	1.75131e+16	29	5.07881e+16	2170	3026783573693441	Beta,0
CHGA	57	9982486865148860	57	9982486865148860	0	0	0	4832490895539004	Beta,0
EGR1	23	4.02802e+16	3	5253940455341506	20	3502626970227671	14700	2912182985806802	Beta,0
FOS	19	3327495621716287	9	1576182136602452	10	1.75131e+16	14000	3777436800532807	Beta,0
MEIS2	36	6304728546409807	15	2626970227670753	21	3677758318739054	39820	6133194765460147	Beta,0
FOXP1	23	4.02802e+16	2	3.50263e+16	21	3677758318739054	11200	3177912689844629	Beta,0
CDX2	10	1.75131e+16	0	0	10	1.75131e+16	0	2.28754e+16	Beta,0
XBP1	20	3502626970227671	6	1.05079e+16	14	2.45184e+16	11280	3259586730192366	Beta,0
JUNB	18	3152364273204904	10	1.75131e+16	8	1.40105e+16	12980	2556279789489346	Beta,0
CTCF	18	3152364273204904	0	0	18	3152364273204904	0	3296647923788793	Beta,0
ST3GAL6	14	2.45184e+16	14	2.45184e+16	0	0	0	3.05826e+16	Beta,0
ATF1	8	1.40105e+16	0	0	8	1.40105e+16	0	181845713919322	Beta,0
ETV1	70	1.22592e+16	7	1.22592e+16	63	1.10333e+16	49640	7087141795363326	Beta,0
DIRAS3	27	4.72855e+16	27	4.72855e+16	0	0	0	2.37999e+16	Beta,0
KLF4	6	1.05079e+16	0	0	6	1.05079e+16	0	7441068047239337	Beta,0
SCGN	52	9106830122591944	52	9106830122591944	0	0	0	3691378710419377	Beta,0
RORC	29	5.07881e+16	0	0	29	5.07881e+16	0	301102094977077	Beta,0
TXNIP	41	7180385288966724	41	7180385288966724	0	0	0	3.40193e+16	Beta,0
RFX2	2	3.50263e+16	0	0	2	3.50263e+16	0	5818111685679878	Beta,0
CITED1	17	297723292469352	17	297723292469352	0	0	0	3081445826219713	Beta,0
SIX6	4	7.00525e+16	0	0	4	7.00525e+16	0	1.17086e+16	Beta,0
NR4A2	48	840630472854641	0	0	48	840630472854641	0	4944898141101386	Beta,0
ZEB1	11	1926444833625219	0	0	11	1926444833625219	0	1.3473e+16	Beta,0
ERO1B	50	8756567425569177	50	8756567425569177	0	0	0	4.39433e+16	Beta,0
SLC30A8	20	3502626970227671	20	3502626970227671	0	0	0	2.47545e+16	Beta,0
ESM1	23	4.02802e+16	23	4.02802e+16	0	0	0	2.9774e+16	Beta,0
HIGD1A	24	4203152364273205	24	4203152364273205	0	0	0	3478076993679494	Beta,0
SCG2	28	4903677758318739	28	4903677758318739	0	0	0	1.46944e+16	Beta,0
NFIA	9	1576182136602452	1	1.75131e+16	8	1.40105e+16	3730	1445060305293562	Beta,0
GATA6	17	297723292469352	0	0	17	297723292469352	0	2794048147821311	Beta,0
HHEX	5	8756567425569177	4	7.00525e+16	1	1.75131e+16	1330	1.41876e+16	Beta,0
THRB	30	5253940455341506	4	7.00525e+16	26	4553415061295972	33460	3.05027e+16	Beta,0
RBP2	14	2.45184e+16	14	2.45184e+16	0	0	0	1.49218e+16	Beta,0
ATF3	9	1576182136602452	1	1.75131e+16	8	1.40105e+16	40	1496651560236884	Beta,0
GPR137B	45	7880910683012259	45	7880910683012259	0	0	0	4.36565e+16	Beta,0
BBX	17	297723292469352	0	0	17	297723292469352	0	2.40219e+16	Beta,0
TGIF2	2	3.50263e+16	0	0	2	3.50263e+16	0	8384194820634229	Beta,0
ELF1	13	2276707530647986	0	0	13	2276707530647986	0	1.81694e+16	Beta,0
PROX1	5	8756567425569177	0	0	5	8756567425569177	0	5.34704e+16	Beta,0
RORA	72	1.26095e+16	6	1.05079e+16	66	1.15587e+16	92230	5514447635232731	Beta,0
RGS4	16	2.8021e+16	16	2.8021e+16	0	0	0	9720959485759478	Beta,0
ETV5	30	5253940455341506	0	0	30	5253940455341506	0	3702290231624092	Beta,0
G6PC2	24	4203152364273205	24	4203152364273205	0	0	0	2560775887459462	Beta,0
ISL1	46	8056042031523643	39	6830122591943957	7	1.22592e+16	69290	3.48983e+16	Beta,0
NR2F6	25	4.37828e+16	0	0	25	4.37828e+16	0	2.72508e+16	Beta,0
CHIA	23	4.02802e+16	23	4.02802e+16	0	0	0	2.3261e+16	Beta,0
GPX3	22	3852889667250438	22	3852889667250438	0	0	0	2.36448e+16	Beta,0
FOXN3	25	4.37828e+16	0	0	25	4.37828e+16	0	2689614922210508	Beta,0
MT3	34	595446584938704	34	595446584938704	0	0	0	2.2729e+16	Beta,0
NFE2L2	4	7.00525e+16	0	0	4	7.00525e+16	0	1.3471e+16	Beta,0
CREB5	6	1.05079e+16	0	0	6	1.05079e+16	0	9541607041756918	Beta,0
ASB9	26	4553415061295972	26	4553415061295972	0	0	0	2338148429849003	Beta,0
NKX2-2	3	5253940455341506	1	1.75131e+16	2	3.50263e+16	960	1759726524081288	Beta,0
TM4SF4	16	2.8021e+16	16	2.8021e+16	0	0	0	1.21162e+16	Beta,0
CREB1	8	1.40105e+16	0	0	8	1.40105e+16	0	1.90633e+16	Beta,0
PTN	23	4.02802e+16	23	4.02802e+16	0	0	0	2436681836229172	Beta,0
CPE	27	4.72855e+16	27	4.72855e+16	0	0	0	2625125829641537	Beta,0
BHLHA15	4	7.00525e+16	0	0	4	7.00525e+16	0	6481700319911352	Beta,0
FOSL2	8	1.40105e+16	0	0	8	1.40105e+16	0	1447293641036263	Beta,0
MAZ	17	297723292469352	0	0	17	297723292469352	0	2.25738e+16	Beta,0
PLAGL1	23	4.02802e+16	3	5253940455341506	20	3502626970227671	5140	8415015795821233	Beta,0
MDK	22	3852889667250438	22	3852889667250438	0	0	0	2.12481e+16	Beta,0
HSF1	5	8756567425569177	0	0	5	8756567425569177	0	8379957868643144	Beta,0
FEV	28	4903677758318739	9	1576182136602452	19	3327495621716287	50990	2.26834e+16	Beta,0
MNX1	12	2.10158e+16	0	0	12	2.10158e+16	0	1.39075e+16	Beta,0
NKX6-1	12	2.10158e+16	2	3.50263e+16	10	1.75131e+16	11620	9391143216301292	Beta,0
RFX1	2	3.50263e+16	0	0	2	3.50263e+16	0	6688838719177327	Beta,0
COX4I2	18	3152364273204904	18	3152364273204904	0	0	0	5.79526e+16	Beta,0
PDX1	18	3152364273204904	13	2276707530647986	5	8756567425569177	2570	2544020374883162	Beta,0
PPARA	6	1.05079e+16	0	0	6	1.05079e+16	0	1.07722e+16	Beta,0
SMAD3	16	2.8021e+16	0	0	16	2.8021e+16	0	2.36618e+16	Beta,0
LMX1A	8	1.40105e+16	0	0	8	1.40105e+16	0	9151970744473176	Beta,0
KLF6	24	4203152364273205	0	0	24	4203152364273205	0	2.47673e+16	Beta,0
ELF2	5	8756567425569177	1	1.75131e+16	4	7.00525e+16	1770	5212121236134452	Beta,0
LSAMP	18	3152364273204904	18	3152364273204904	0	0	0	2513390781884498	Beta,0
ZNF704	15	2626970227670753	0	0	15	2626970227670753	0	1.62894e+16	Beta,0
CREB3	7	1.22592e+16	0	0	7	1.22592e+16	0	1.08716e+16	Beta,0
SELENOM	26	4553415061295972	26	4553415061295972	0	0	0	2.07507e+16	Beta,0
HNF4A	11	1926444833625219	0	0	11	1926444833625219	0	2.06536e+16	Beta,0
BCL11A	3	5253940455341506	0	0	3	5253940455341506	0	3.76316e+16	Beta,0
MEIS1	4	7.00525e+16	1	1.75131e+16	3	5253940455341506	280	3262306610201121	Beta,0
TCF21	4	7.00525e+16	0	0	4	7.00525e+16	0	4524031210745722	Beta,0
DNMT1	24	4203152364273205	0	0	24	4203152364273205	0	2643008782070476	Beta,0
MEIS3	11	1926444833625219	0	0	11	1926444833625219	0	1568056681863321	Beta,0
HOXB2	14	2.45184e+16	0	0	14	2.45184e+16	0	8594133942493787	Beta,0
ALDOB	9	1576182136602452	9	1576182136602452	0	0	0	3.11284e+16	Beta,0
KLF10	27	4.72855e+16	0	0	27	4.72855e+16	0	2.55245e+16	Beta,0
RFX6	23	4.02802e+16	1	1.75131e+16	22	3852889667250438	2060	2.22548e+16	Beta,0
NEUROD1	9	1576182136602452	2	3.50263e+16	7	1.22592e+16	6030	1.14487e+16	Beta,0
PCSK2	18	3152364273204904	18	3152364273204904	0	0	0	1408606877593669	Beta,0
CXCR4	11	1926444833625219	11	1926444833625219	0	0	0	1171080037088971	Beta,0
KLF13	4	7.00525e+16	0	0	4	7.00525e+16	0	6521187924417092	Beta,0
ZBTB20	4	7.00525e+16	4	7.00525e+16	0	0	0	7672023527362572	Beta,0
KLF12	7	1.22592e+16	0	0	7	1.22592e+16	0	1.63399e+16	Beta,0
PTGER3	16	2.8021e+16	16	2.8021e+16	0	0	0	1.52492e+16	Beta,0
REST	4	7.00525e+16	0	0	4	7.00525e+16	0	9828597267862306	Beta,0
SOX9	9	1576182136602452	0	0	9	1576182136602452	0	9560423525895408	Beta,0
GATA4	8	1.40105e+16	0	0	8	1.40105e+16	0	1.17647e+16	Beta,0
E2F2	6	1.05079e+16	0	0	6	1.05079e+16	0	1.4807e+16	Beta,0
ZNF385D	12	2.10158e+16	0	0	12	2.10158e+16	0	1225004019423708	Beta,0
TGIF1	14	2.45184e+16	0	0	14	2.45184e+16	0	1.31224e+16	Beta,0
H2AC21	6	1.05079e+16	6	1.05079e+16	0	0	0	6243095697669048	Beta,0
TCF4	8	1.40105e+16	0	0	8	1.40105e+16	0	4908000902480671	Beta,0
CALML4	12	2.10158e+16	12	2.10158e+16	0	0	0	1.56587e+16	Beta,0
ETS1	25	4.37828e+16	0	0	25	4.37828e+16	0	262577619815287	Beta,0
KLF11	7	1.22592e+16	0	0	7	1.22592e+16	0	886421362265649	Beta,0
IGFBP5	9	1576182136602452	9	1576182136602452	0	0	0	889285708596419	Beta,0
ELF3	17	297723292469352	0	0	17	297723292469352	0	1292321811117801	Beta,0
NFIB	10	1.75131e+16	0	0	10	1.75131e+16	0	8904289217784667	Beta,0
MSC	4	7.00525e+16	0	0	4	7.00525e+16	0	8536110585087592	Beta,0
SLC7A2	15	2626970227670753	15	2626970227670753	0	0	0	1.70695e+16	Beta,0
DMRT1	1	1.75131e+16	0	0	1	1.75131e+16	0	6953659572563117	Beta,0
NEUROG1	2	3.50263e+16	0	0	2	3.50263e+16	0	5328456810384605	Beta,0
KLF9	6	1.05079e+16	0	0	6	1.05079e+16	0	8651123024420043	Beta,0
MAFA	3	5253940455341506	0	0	3	5253940455341506	0	6640757488429462	Beta,0
KRT7	7	1.22592e+16	7	1.22592e+16	0	0	0	7452426383141081	Beta,0
IGFBPL1	18	3152364273204904	18	3152364273204904	0	0	0	1365188445817655	Beta,0
IRF3	9	1576182136602452	0	0	9	1576182136602452	0	1289571099699434	Beta,0
HES6	2	3.50263e+16	0	0	2	3.50263e+16	0	809680729840212	Beta,0
TUBB2B	14	2.45184e+16	14	2.45184e+16	0	0	0	8235876738815405	Beta,0
FOXO1	12	2.10158e+16	1	1.75131e+16	11	1926444833625219	3660	6648440775405652	Beta,0
CRYBA2	16	2.8021e+16	16	2.8021e+16	0	0	0	4819816120513269	Beta,0
TEAD3	3	5253940455341506	0	0	3	5253940455341506	0	7692410548106884	Beta,0
E2F1	8	1.40105e+16	0	0	8	1.40105e+16	0	1141182713321363	Beta,0
ROBO2	10	1.75131e+16	10	1.75131e+16	0	0	0	1353486717332547	Beta,0
NR1H2	5	8756567425569177	0	0	5	8756567425569177	0	923891103287672	Beta,0
DUSP1	9	1576182136602452	9	1576182136602452	0	0	0	8943915485124478	Beta,0
FAM162B	8	1.40105e+16	8	1.40105e+16	0	0	0	8561202568164815	Beta,0
NR1H4	30	5253940455341506	0	0	30	5253940455341506	0	3.01261e+16	Beta,0
NFE2	5	8756567425569177	4	7.00525e+16	1	1.75131e+16	160	6198282368757667	Beta,0
TAGLN3	7	1.22592e+16	7	1.22592e+16	0	0	0	8036339629856105	Beta,0
MGST1	2	3.50263e+16	2	3.50263e+16	0	0	0	3.91377e+16	Beta,0
MTF2	14	2.45184e+16	0	0	14	2.45184e+16	0	1.4824e+16	Beta,0
MAX	4	7.00525e+16	0	0	4	7.00525e+16	0	575480020823623	Beta,0
CDC5L	6	1.05079e+16	1	1.75131e+16	5	8756567425569177	1020	5179031318035072	Beta,0
SCG5	27	4.72855e+16	27	4.72855e+16	0	0	0	2.33074e+16	Beta,0
HOXD3	2	3.50263e+16	0	0	2	3.50263e+16	0	3.11715e+16	Beta,0
PATZ1	6	1.05079e+16	0	0	6	1.05079e+16	0	1.03854e+16	Beta,0
BCL11B	5	8756567425569177	0	0	5	8756567425569177	0	681958523793163	Beta,0
NR2F1	8	1.40105e+16	0	0	8	1.40105e+16	0	1.38374e+16	Beta,0
MEF2A	3	5253940455341506	0	0	3	5253940455341506	0	8456980045044138	Beta,0
SP1	4	7.00525e+16	0	0	4	7.00525e+16	0	2998062624888544	Beta,0
ETV2	5	8756567425569177	0	0	5	8756567425569177	0	1064981705576345	Beta,0
GADD45A	6	1.05079e+16	6	1.05079e+16	0	0	0	6915996727090575	Beta,0
IRF7	6	1.05079e+16	0	0	6	1.05079e+16	0	9439318394157180	Beta,0
ZNF169	1	1.75131e+16	0	0	1	1.75131e+16	0	4045546382557175	Beta,0
CDA	8	1.40105e+16	8	1.40105e+16	0	0	0	9178227104449364	Beta,0
PPARG	10	1.75131e+16	0	0	10	1.75131e+16	0	1.10916e+16	Beta,0
DMRT2	1	1.75131e+16	0	0	1	1.75131e+16	0	5973849280366632	Beta,0
FOXA2	3	5253940455341506	0	0	3	5253940455341506	0	8445914052202504	Beta,0
ABCC8	5	8756567425569177	5	8756567425569177	0	0	0	9071811946438612	Beta,0
SMU1	3	5253940455341506	3	5253940455341506	0	0	0	2.72274e+16	Beta,0
SOX13	5	8756567425569177	0	0	5	8756567425569177	0	6331237199772966	Beta,0
E2F5	13	2276707530647986	0	0	13	2276707530647986	0	1.82633e+16	Beta,0
IGFBP2	17	297723292469352	17	297723292469352	0	0	0	1.25434e+16	Beta,0
RARRES2	4	7.00525e+16	4	7.00525e+16	0	0	0	3.31979e+16	Beta,0
ANXA4	8	1.40105e+16	8	1.40105e+16	0	0	0	7406847083490047	Beta,0
MTSS1	5	8756567425569177	5	8756567425569177	0	0	0	3869250822699813	Beta,0
EGR2	14	2.45184e+16	0	0	14	2.45184e+16	0	1.48178e+16	Beta,0
CACNA2D1	18	3152364273204904	18	3152364273204904	0	0	0	1.35929e+16	Beta,0
STAT1	12	2.10158e+16	1	1.75131e+16	11	1926444833625219	160	4378555554329509	Beta,0
GLIS2	4	7.00525e+16	0	0	4	7.00525e+16	0	7011002056204634	Beta,0
TCF7L2	9	1576182136602452	0	0	9	1576182136602452	0	106505428793295	Beta,0
MECOM	5	8756567425569177	0	0	5	8756567425569177	0	3459855028460438	Beta,0
NFIC	6	1.05079e+16	0	0	6	1.05079e+16	0	6915773171161406	Beta,0
CLU	9	1576182136602452	9	1576182136602452	0	0	0	1.10805e+16	Beta,0
SLC7A8	11	1926444833625219	11	1926444833625219	0	0	0	1.0836e+16	Beta,0
CALB1	17	297723292469352	17	297723292469352	0	0	0	1.07182e+16	Beta,0
FOXP4	7	1.22592e+16	0	0	7	1.22592e+16	0	701825059306095	Beta,0
FOSB	12	2.10158e+16	4	7.00525e+16	8	1.40105e+16	34790	1.40747e+16	Beta,0
NFIX	11	1926444833625219	0	0	11	1926444833625219	0	7510597000452755	Beta,0
PAX4	9	1576182136602452	0	0	9	1576182136602452	0	8841803873675427	Beta,0
TFDP1	15	2626970227670753	0	0	15	2626970227670753	0	1331876196540238	Beta,0
HIF1A	1	1.75131e+16	0	0	1	1.75131e+16	0	2.36105e+16	Beta,0
PKNOX1	2	3.50263e+16	0	0	2	3.50263e+16	0	4235563792537633	Beta,0
HOXB3	9	1576182136602452	0	0	9	1576182136602452	0	6441529013466597	Beta,0
GSTM3	5	8756567425569177	5	8756567425569177	0	0	0	2491215159555056	Beta,0
NFE2L3	4	7.00525e+16	0	0	4	7.00525e+16	0	8386977339149099	Beta,0
TMEM52	4	7.00525e+16	4	7.00525e+16	0	0	0	4.85542e+16	Beta,0
ELF4	15	2626970227670753	0	0	15	2626970227670753	0	1.59635e+16	Beta,0
RARA	8	1.40105e+16	0	0	8	1.40105e+16	0	8994213842797619	Beta,0
TEAD2	1	1.75131e+16	0	0	1	1.75131e+16	0	1215703513377166	Beta,0
GLS	8	1.40105e+16	8	1.40105e+16	0	0	0	7427816099959934	Beta,0
RFX3	16	2.8021e+16	6	1.05079e+16	10	1.75131e+16	16150	1.1244e+16	Beta,0
NR2F2	3	5253940455341506	0	0	3	5253940455341506	0	5936670180993483	Beta,0
NR3C1	11	1926444833625219	0	0	11	1926444833625219	0	9966948889925508	Beta,0
ASCL2	16	2.8021e+16	0	0	16	2.8021e+16	0	782519638253769	Beta,0
TUSC3	8	1.40105e+16	8	1.40105e+16	0	0	0	5897726287032688	Beta,0
TFDP2	17	297723292469352	0	0	17	297723292469352	0	2.05608e+16	Beta,0
ZNF444	1	1.75131e+16	0	0	1	1.75131e+16	0	502224164900715	Beta,0
TMEM176A	4	7.00525e+16	4	7.00525e+16	0	0	0	1.89681e+16	Beta,0
STMN3	13	2276707530647986	13	2276707530647986	0	0	0	1.07295e+16	Beta,0
SEBOX	3	5253940455341506	0	0	3	5253940455341506	0	5531335058326703	Beta,0
CTSZ	1	1.75131e+16	1	1.75131e+16	0	0	0	3525741295713606	Beta,0
TCF7	1	1.75131e+16	0	0	1	1.75131e+16	0	2183609081069017	Beta,0
ZNF281	3	5253940455341506	0	0	3	5253940455341506	0	2.72796e+16	Beta,0
BTBD17	7	1.22592e+16	7	1.22592e+16	0	0	0	6335661557708319	Beta,0
ANXA10	5	8756567425569177	5	8756567425569177	0	0	0	5854836795851373	Beta,0
KLF3	6	1.05079e+16	0	0	6	1.05079e+16	0	4452795971222457	Beta,0
LGALS2	8	1.40105e+16	8	1.40105e+16	0	0	0	4490683300796694	Beta,0
PCDH9	3	5253940455341506	3	5253940455341506	0	0	0	6712150749798486	Beta,0
MEF2C	2	3.50263e+16	0	0	2	3.50263e+16	0	6009026229133705	Beta,0
ETV6	4	7.00525e+16	0	0	4	7.00525e+16	0	4620775217171565	Beta,0
ATF4	7	1.22592e+16	0	0	7	1.22592e+16	0	4.55336e+16	Beta,0
DDC	3	5253940455341506	3	5253940455341506	0	0	0	3.70447e+16	Beta,0
MYBL2	2	3.50263e+16	0	0	2	3.50263e+16	0	2.40305e+16	Beta,0
PBX3	7	1.22592e+16	0	0	7	1.22592e+16	0	4296084051423493	Beta,0
GPX1	4	7.00525e+16	4	7.00525e+16	0	0	0	4244344980525166	Beta,0
SLC3A2	16	2.8021e+16	16	2.8021e+16	0	0	0	8193056112768696	Beta,0
RBPJ	2	3.50263e+16	0	0	2	3.50263e+16	0	7343884835588755	Beta,0
SOX11	4	7.00525e+16	0	0	4	7.00525e+16	0	5.892e+16	Beta,0
C6orf52	9	1576182136602452	9	1576182136602452	0	0	0	7965975190977682	Beta,0
NR2C2	6	1.05079e+16	0	0	6	1.05079e+16	0	8225793949794048	Beta,0
MAFG	5	8756567425569177	0	0	5	8756567425569177	0	2312022472882434	Beta,0
ROS1	6	1.05079e+16	6	1.05079e+16	0	0	0	8807739667027013	Beta,0
ELP4	17	297723292469352	17	297723292469352	0	0	0	6930348590007916	Beta,0
BHLHE41	6	1.05079e+16	0	0	6	1.05079e+16	0	3.14359e+16	Beta,0
EGR3	14	2.45184e+16	0	0	14	2.45184e+16	0	1.72678e+16	Beta,0
SREBF2	2	3.50263e+16	0	0	2	3.50263e+16	0	2.00222e+16	Beta,0
UCHL1	12	2.10158e+16	12	2.10158e+16	0	0	0	5.48866e+16	Beta,0
PPP1R1A	10	1.75131e+16	10	1.75131e+16	0	0	0	4.77256e+16	Beta,0
CNTN1	6	1.05079e+16	6	1.05079e+16	0	0	0	7858986742659224	Beta,0
GRIA3	5	8756567425569177	5	8756567425569177	0	0	0	5290516743956682	Beta,0
PCSK1N	14	2.45184e+16	14	2.45184e+16	0	0	0	9991910902740468	Beta,0
ACVR1C	3	5253940455341506	3	5253940455341506	0	0	0	1.22487e+16	Beta,0
RBFOX1	3	5253940455341506	3	5253940455341506	0	0	0	1.59063e+16	Beta,0
KLF15	2	3.50263e+16	0	0	2	3.50263e+16	0	4.71358e+16	Beta,0
CREM	4	7.00525e+16	0	0	4	7.00525e+16	0	4981961183477026	Beta,0
KLF5	4	7.00525e+16	0	0	4	7.00525e+16	0	5.30279e+16	Beta,0
NEUROD2	2	3.50263e+16	0	0	2	3.50263e+16	0	327094557227549	Beta,0
SPINK1	2	3.50263e+16	2	3.50263e+16	0	0	0	2985102096787681	Beta,0
RABEPK	2	3.50263e+16	2	3.50263e+16	0	0	0	1.8764e+16	Beta,0
EHF	7	1.22592e+16	0	0	7	1.22592e+16	0	6861660396273853	Beta,0
ETV4	10	1.75131e+16	0	0	10	1.75131e+16	0	1.05115e+16	Beta,0
FOXA3	3	5253940455341506	0	0	3	5253940455341506	0	5.76252e+16	Beta,0
YBX1	4	7.00525e+16	3	5253940455341506	1	1.75131e+16	970	4.84277e+16	Beta,0
SMAD9	27	4.72855e+16	0	0	27	4.72855e+16	0	1262303325166618	Beta,0
IRX6	2	3.50263e+16	0	0	2	3.50263e+16	0	7806704674606318	Beta,0
ENPP2	8	1.40105e+16	8	1.40105e+16	0	0	0	5.51264e+16	Beta,0
LIN28B	9	1576182136602452	0	0	9	1576182136602452	0	7738111617373847	Beta,0
PRDM5	1	1.75131e+16	0	0	1	1.75131e+16	0	4373920048498691	Beta,0
NRF1	6	1.05079e+16	0	0	6	1.05079e+16	0	6649784803681125	Beta,0
ESRRB	2	3.50263e+16	0	0	2	3.50263e+16	0	5695639198442488	Beta,0
OSR2	1	1.75131e+16	0	0	1	1.75131e+16	0	3655829803180442	Beta,0
CPB2	6	1.05079e+16	6	1.05079e+16	0	0	0	3182216454568224	Beta,0
PCSK1	2	3.50263e+16	2	3.50263e+16	0	0	0	2.3022e+16	Beta,0
TOX	6	1.05079e+16	6	1.05079e+16	0	0	0	6986257316695874	Beta,0
P2RY14	7	1.22592e+16	7	1.22592e+16	0	0	0	7799353812946175	Beta,0
MEOX1	3	5253940455341506	0	0	3	5253940455341506	0	4783817780315173	Beta,0
CXXC1	2	3.50263e+16	0	0	2	3.50263e+16	0	2471907381688348	Beta,0
PRNP	2	3.50263e+16	2	3.50263e+16	0	0	0	3753516119616148	Beta,0
CADM2	7	1.22592e+16	7	1.22592e+16	0	0	0	2.99877e+16	Beta,0
SP3	7	1.22592e+16	0	0	7	1.22592e+16	0	5677278023311899	Beta,0
E2F3	3	5253940455341506	0	0	3	5253940455341506	0	5.49949e+16	Beta,0
HES1	4	7.00525e+16	0	0	4	7.00525e+16	0	1709818627654351	Beta,0
HOXB5	4	7.00525e+16	0	0	4	7.00525e+16	0	3.97008e+16	Beta,0
HSPH1	4	7.00525e+16	4	7.00525e+16	0	0	0	2127664517494227	Beta,0
NR5A2	2	3.50263e+16	0	0	2	3.50263e+16	0	1.35267e+16	Beta,0
ZBTB37	2	3.50263e+16	0	0	2	3.50263e+16	0	2620234470863137	Beta,0
CASR	2	3.50263e+16	2	3.50263e+16	0	0	0	358649890828014	Beta,0
BHLHE40	1	1.75131e+16	0	0	1	1.75131e+16	0	5632114370709967	Beta,0
KCNJ8	2	3.50263e+16	2	3.50263e+16	0	0	0	3.76862e+16	Beta,0
CREB3L2	8	1.40105e+16	0	0	8	1.40105e+16	0	7753884781723071	Beta,0
ACTC1	4	7.00525e+16	4	7.00525e+16	0	0	0	3.36618e+16	Beta,0
B2M	15	2626970227670753	15	2626970227670753	0	0	0	889522859952477	Beta,0
CFAP61	5	8756567425569177	5	8756567425569177	0	0	0	6738504789205427	Beta,0
FOXQ1	2	3.50263e+16	0	0	2	3.50263e+16	0	1.47427e+16	Beta,0
SCN9A	1	1.75131e+16	1	1.75131e+16	0	0	0	1.94358e+16	Beta,0
MITF	2	3.50263e+16	0	0	2	3.50263e+16	0	3520971564850901	Beta,0
PLAG1	1	1.75131e+16	0	0	1	1.75131e+16	0	4.04077e+16	Beta,0
SMAD5	3	5253940455341506	0	0	3	5253940455341506	0	6012970887399949	Beta,0
DCDC2	4	7.00525e+16	4	7.00525e+16	0	0	0	4145690236550905	Beta,0
PAPPA2	7	1.22592e+16	7	1.22592e+16	0	0	0	657284789921567	Beta,0
KCNK16	7	1.22592e+16	7	1.22592e+16	0	0	0	7115494995224714	Beta,0
JDP2	3	5253940455341506	0	0	3	5253940455341506	0	491562961649108	Beta,0
BAMBI	1	1.75131e+16	1	1.75131e+16	0	0	0	1.36555e+16	Beta,0
RELA	2	3.50263e+16	0	0	2	3.50263e+16	0	3488674687753156	Beta,0
PTPRN2	3	5253940455341506	3	5253940455341506	0	0	0	1.28378e+16	Beta,0
HEPACAM2	4	7.00525e+16	4	7.00525e+16	0	0	0	1491258145751307	Beta,0
VDR	3	5253940455341506	0	0	3	5253940455341506	0	7210069704060597	Beta,0
KCNJ11	3	5253940455341506	3	5253940455341506	0	0	0	5839178290904413	Beta,0
MZF1	2	3.50263e+16	0	0	2	3.50263e+16	0	1.01063e+16	Beta,0
C4BPB	6	1.05079e+16	6	1.05079e+16	0	0	0	5881844048382787	Beta,0
STAT6	1	1.75131e+16	0	0	1	1.75131e+16	0	325283587904785	Beta,0
NHLH1	7	1.22592e+16	0	0	7	1.22592e+16	0	3788904912738227	Beta,0
SKOR1	1	1.75131e+16	0	0	1	1.75131e+16	0	3.22088e+16	Beta,0
NRXN1	6	1.05079e+16	6	1.05079e+16	0	0	0	4643558077914544	Beta,0
GLIS3	1	1.75131e+16	0	0	1	1.75131e+16	0	1660047989460382	Beta,0
TFAP4	1	1.75131e+16	0	0	1	1.75131e+16	0	1.64095e+16	Beta,0
NFIL3	1	1.75131e+16	0	0	1	1.75131e+16	0	894135206398988	Beta,0
SERPINF2	2	3.50263e+16	2	3.50263e+16	0	0	0	9461225997339032	Beta,0
TM4SF1	4	7.00525e+16	4	7.00525e+16	0	0	0	2797436152138114	Beta,0
CEBPA	4	7.00525e+16	0	0	4	7.00525e+16	0	1.20408e+16	Beta,0
NFYA	3	5253940455341506	0	0	3	5253940455341506	0	4099130005327854	Beta,0
GTF3A	2	3.50263e+16	0	0	2	3.50263e+16	0	3376480547874254	Beta,0
ZNF250	1	1.75131e+16	0	0	1	1.75131e+16	0	1.36495e+16	Beta,0
ARID5B	1	1.75131e+16	0	0	1	1.75131e+16	0	2550768624347903	Beta,0
KLF7	7	1.22592e+16	0	0	7	1.22592e+16	0	4067790248743389	Beta,0
IRF1	1	1.75131e+16	0	0	1	1.75131e+16	0	2126654629426974	Beta,0
NR3C2	4	7.00525e+16	0	0	4	7.00525e+16	0	3.67027e+16	Beta,0
PKNOX2	5	8756567425569177	0	0	5	8756567425569177	0	709779591044377	Beta,0
HOXA2	2	3.50263e+16	0	0	2	3.50263e+16	0	3.81941e+16	Beta,0
RAB26	12	2.10158e+16	12	2.10158e+16	0	0	0	6609844600125053	Beta,0
GRHL2	1	1.75131e+16	0	0	1	1.75131e+16	0	5298291135842472	Beta,0
HMGN3	9	1576182136602452	9	1576182136602452	0	0	0	6497850679978491	Beta,0
LGI4	4	7.00525e+16	4	7.00525e+16	0	0	0	5039989957086619	Beta,0
SOX3	1	1.75131e+16	0	0	1	1.75131e+16	0	3.03061e+16	Beta,0
TCF3	4	7.00525e+16	0	0	4	7.00525e+16	0	1.25135e+16	Beta,0
MEST	9	1576182136602452	9	1576182136602452	0	0	0	6242173096551589	Beta,0
ARID3B	1	1.75131e+16	0	0	1	1.75131e+16	0	1.21521e+16	Beta,0
PBX4	1	1.75131e+16	0	0	1	1.75131e+16	0	1.21361e+16	Beta,0
ZNF16	2	3.50263e+16	0	0	2	3.50263e+16	0	1.34186e+16	Beta,0
E2F7	3	5253940455341506	0	0	3	5253940455341506	0	3.78623e+16	Beta,0
ARNTL	1	1.75131e+16	0	0	1	1.75131e+16	0	8054301480954651	Beta,0
FOXK1	1	1.75131e+16	0	0	1	1.75131e+16	0	1.30624e+16	Beta,0
PBX1	10	1.75131e+16	1	1.75131e+16	9	1576182136602452	2460	5067731134331789	Beta,0
POU3F1	2	3.50263e+16	0	0	2	3.50263e+16	0	1808171554322795	Beta,0
NFATC2	3	5253940455341506	0	0	3	5253940455341506	0	4874358691360008	Beta,0
CUX1	1	1.75131e+16	0	0	1	1.75131e+16	0	2316099199285968	Beta,0
IRX1	1	1.75131e+16	0	0	1	1.75131e+16	0	3.4188e+16	Beta,0
IKZF1	1	1.75131e+16	0	0	1	1.75131e+16	0	2954726862069353	Beta,0
NEGR1	6	1.05079e+16	6	1.05079e+16	0	0	0	3961549861637192	Beta,0
ELF5	2	3.50263e+16	0	0	2	3.50263e+16	0	3508120086302652	Beta,0
SP4	1	1.75131e+16	0	0	1	1.75131e+16	0	7863340121531908	Beta,0
REV3L	4	7.00525e+16	4	7.00525e+16	0	0	0	3562497400226555	Beta,0
DEPP1	2	3.50263e+16	2	3.50263e+16	0	0	0	2.35314e+16	Beta,0
SCG3	2	3.50263e+16	2	3.50263e+16	0	0	0	7.28789e+16	Beta,0
NR4A3	5	8756567425569177	0	0	5	8756567425569177	0	9969338542907532	Beta,0
SIM1	1	1.75131e+16	1	1.75131e+16	0	0	0	7597249720770025	Beta,0
QRFPR	1	1.75131e+16	1	1.75131e+16	0	0	0	814157951329639	Beta,0
ENO2	3	5253940455341506	3	5253940455341506	0	0	0	4.6098e+16	Beta,0
QSOX1	1	1.75131e+16	1	1.75131e+16	0	0	0	239997870808263	Beta,0
USF2	2	3.50263e+16	0	0	2	3.50263e+16	0	9034758461151388	Beta,0
ZBTB7A	2	3.50263e+16	0	0	2	3.50263e+16	0	3.91899e+16	Beta,0
GADD45G	4	7.00525e+16	4	7.00525e+16	0	0	0	4501799902995472	Beta,0
MAP2	1	1.75131e+16	1	1.75131e+16	0	0	0	7617491411451985	Beta,0
PPARD	2	3.50263e+16	0	0	2	3.50263e+16	0	3.39209e+16	Beta,0
NKX2-3	2	3.50263e+16	0	0	2	3.50263e+16	0	4188423638342176	Beta,0
MBNL2	1	1.75131e+16	0	0	1	1.75131e+16	0	3309810795117147	Beta,0
E2F8	5	8756567425569177	0	0	5	8756567425569177	0	3.00699e+16	Beta,0
BACH2	1	1.75131e+16	0	0	1	1.75131e+16	0	8061350477154436	Beta,0
DMRTA1	1	1.75131e+16	0	0	1	1.75131e+16	0	3.30231e+16	Beta,0
MECP2	1	1.75131e+16	0	0	1	1.75131e+16	0	329928025753336	Beta,0
GBE1	1	1.75131e+16	1	1.75131e+16	0	0	0	2.63033e+16	Beta,0
NFYC	3	5253940455341506	0	0	3	5253940455341506	0	1998914457287889	Beta,0
TNIK	4	7.00525e+16	4	7.00525e+16	0	0	0	6306552547997522	Beta,0
DPP10	4	7.00525e+16	4	7.00525e+16	0	0	0	3566205548829698	Beta,0
NFATC3	1	1.75131e+16	0	0	1	1.75131e+16	0	1.20567e+16	Beta,0
GRM4	2	3.50263e+16	2	3.50263e+16	0	0	0	3689918733916768	Beta,0
EMB	6	1.05079e+16	6	1.05079e+16	0	0	0	4518262743483763	Beta,0
ARNT2	1	1.75131e+16	0	0	1	1.75131e+16	0	1.99546e+16	Beta,0
RUNX1T1	8	1.40105e+16	8	1.40105e+16	0	0	0	8686244244802807	Beta,0
MTMR7	1	1.75131e+16	1	1.75131e+16	0	0	0	2.59349e+16	Beta,0
GPR160	5	8756567425569177	5	8756567425569177	0	0	0	2.39578e+16	Beta,0
RXRA	3	5253940455341506	0	0	3	5253940455341506	0	2.24277e+16	Beta,0
FOXN2	5	8756567425569177	0	0	5	8756567425569177	0	4.29163e+16	Beta,0
WT1	1	1.75131e+16	0	0	1	1.75131e+16	0	3.20087e+16	Beta,0
GJD2	2	3.50263e+16	2	3.50263e+16	0	0	0	4198064648026651	Beta,0
TP63	1	1.75131e+16	0	0	1	1.75131e+16	0	2702140276582487	Beta,0
NKX1-1	3	5253940455341506	0	0	3	5253940455341506	0	3376853570835502	Beta,0
FOXA1	3	5253940455341506	0	0	3	5253940455341506	0	4.49733e+16	Beta,0
NRCAM	1	1.75131e+16	1	1.75131e+16	0	0	0	2.54285e+16	Beta,0
CREB3L4	2	3.50263e+16	0	0	2	3.50263e+16	0	4.45517e+16	Beta,0
NSG2	1	1.75131e+16	1	1.75131e+16	0	0	0	1531417410371382	Beta,0
PFKFB2	1	1.75131e+16	1	1.75131e+16	0	0	0	2655938292008665	Beta,0
GALP	3	5253940455341506	3	5253940455341506	0	0	0	3905433809274637	Beta,0
SLC22A17	1	1.75131e+16	1	1.75131e+16	0	0	0	2.51735e+16	Beta,0
RORB	1	1.75131e+16	0	0	1	1.75131e+16	0	2.0725e+16	Beta,0
ZNF667	1	1.75131e+16	0	0	1	1.75131e+16	0	3.12996e+16	Beta,0
EBF4	1	1.75131e+16	0	0	1	1.75131e+16	0	3128827666014325	Beta,0
ZNF331	1	1.75131e+16	0	0	1	1.75131e+16	0	2.06712e+16	Beta,0
RBAK	1	1.75131e+16	0	0	1	1.75131e+16	0	3.11385e+16	Beta,0
KIT	2	3.50263e+16	2	3.50263e+16	0	0	0	6628015772150053	Beta,0
DACH1	7	1.22592e+16	7	1.22592e+16	0	0	0	5.58905e+16	Beta,0
OTULINL	1	1.75131e+16	1	1.75131e+16	0	0	0	2.19878e+16	Beta,0
MAP1B	6	1.05079e+16	6	1.05079e+16	0	0	0	4933921141422739	Beta,0
RNF152	1	1.75131e+16	1	1.75131e+16	0	0	0	1.69839e+16	Beta,0
DLX1	2	3.50263e+16	0	0	2	3.50263e+16	0	5563570877051338	Beta,0
DDAH1	1	1.75131e+16	1	1.75131e+16	0	0	0	3876264803866311	Beta,0
POU6F2	1	1.75131e+16	0	0	1	1.75131e+16	0	4508494183786143	Beta,0
BARX1	1	1.75131e+16	0	0	1	1.75131e+16	0	1.04296e+16	Beta,0
ADGRD1	1	1.75131e+16	1	1.75131e+16	0	0	0	9277997962681952	Beta,0
ZSCAN30	1	1.75131e+16	0	0	1	1.75131e+16	0	3.06343e+16	Beta,0
MYF5	2	3.50263e+16	0	0	2	3.50263e+16	0	3.13155e+16	Beta,0
HMGCLL1	4	7.00525e+16	4	7.00525e+16	0	0	0	3797127123386499	Beta,0
THRA	1	1.75131e+16	0	0	1	1.75131e+16	0	7442977002864668	Beta,0
NME2	5	8756567425569177	5	8756567425569177	0	0	0	4.77926e+16	Beta,0
NAGS	1	1.75131e+16	1	1.75131e+16	0	0	0	2.56642e+16	Beta,0
TUBA4A	1	1.75131e+16	1	1.75131e+16	0	0	0	2.10477e+16	Beta,0
ZFY	2	3.50263e+16	0	0	2	3.50263e+16	0	3.54439e+16	Beta,0
RUNX2	3	5253940455341506	0	0	3	5253940455341506	0	3.6911e+16	Beta,0
IGFBP1	1	1.75131e+16	1	1.75131e+16	0	0	0	2.13905e+16	Beta,0
NOBOX	1	1.75131e+16	0	0	1	1.75131e+16	0	2.54902e+16	Beta,0
NPTX2	2	3.50263e+16	2	3.50263e+16	0	0	0	2343140084506977	Beta,0
RXRB	2	3.50263e+16	0	0	2	3.50263e+16	0	2979964643326432	Beta,0
FAM155A	2	3.50263e+16	2	3.50263e+16	0	0	0	5529229168737229	Beta,0
TCFL5	2	3.50263e+16	0	0	2	3.50263e+16	0	2261432929642138	Beta,0
POU2F1	2	3.50263e+16	0	0	2	3.50263e+16	0	1692678369598056	Beta,0
ONECUT2	1	1.75131e+16	0	0	1	1.75131e+16	0	1.93524e+16	Beta,0
NFATC4	1	1.75131e+16	0	0	1	1.75131e+16	0	1.08249e+16	Beta,0
CAMTA2	2	3.50263e+16	2	3.50263e+16	0	0	0	2017148201004229	Beta,0
ZNF566	1	1.75131e+16	0	0	1	1.75131e+16	0	2.92938e+16	Beta,0
IRF8	2	3.50263e+16	0	0	2	3.50263e+16	0	6587466850876165	Beta,0
FOXC1	2	3.50263e+16	0	0	2	3.50263e+16	0	5.90865e+16	Beta,0
APOBEC2	3	5253940455341506	3	5253940455341506	0	0	0	9322102984190854	Beta,0
DMBX1	2	3.50263e+16	0	0	2	3.50263e+16	0	8789015391582103	Beta,0
STAT5B	1	1.75131e+16	0	0	1	1.75131e+16	0	6874196970869684	Beta,0
SERPINI1	1	1.75131e+16	1	1.75131e+16	0	0	0	205763404525133	Beta,0
DBN1	2	3.50263e+16	2	3.50263e+16	0	0	0	4055774000387961	Beta,0
SLC16A10	1	1.75131e+16	1	1.75131e+16	0	0	0	8754016349923071	Beta,0
ATF2	1	1.75131e+16	0	0	1	1.75131e+16	0	6739936954727179	Beta,0
EFNA5	3	5253940455341506	3	5253940455341506	0	0	0	2.45353e+16	Beta,0
TEAD4	1	1.75131e+16	0	0	1	1.75131e+16	0	3916666617753511	Beta,0
UPF3A	1	1.75131e+16	1	1.75131e+16	0	0	0	2.3002e+16	Beta,0
TBX3	1	1.75131e+16	0	0	1	1.75131e+16	0	1264699456508117	Beta,0
CACNA1D	3	5253940455341506	3	5253940455341506	0	0	0	2.50936e+16	Beta,0
HEY2	3	5253940455341506	0	0	3	5253940455341506	0	1.34934e+16	Beta,0
MAF	1	1.75131e+16	0	0	1	1.75131e+16	0	998824047266882	Beta,0
MAFK	3	5253940455341506	0	0	3	5253940455341506	0	2.53523e+16	Beta,0
ISG12(A)	1	1.75131e+16	1	1.75131e+16	0	0	0	1.41249e+16	Beta,0
GUCA2B	1	1.75131e+16	1	1.75131e+16	0	0	0	8643001568064794	Beta,0
ZNF711	1	1.75131e+16	0	0	1	1.75131e+16	0	5911100883459018	Beta,0
DCX	1	1.75131e+16	1	1.75131e+16	0	0	0	1738624005491458	Beta,0
ZNF783	2	3.50263e+16	0	0	2	3.50263e+16	0	322348861389507	Beta,0
ZNF609	2	3.50263e+16	2	3.50263e+16	0	0	0	837271140160291	Beta,0
CLOCK	1	1.75131e+16	0	0	1	1.75131e+16	0	1.35509e+16	Beta,0
GHSR	2	3.50263e+16	2	3.50263e+16	0	0	0	6305504231552091	Beta,0
MLXIPL	2	3.50263e+16	1	1.75131e+16	1	1.75131e+16	130	2281651800375926	Beta,0
ZNF543	2	3.50263e+16	0	0	2	3.50263e+16	0	3554540544456844	Beta,0
KDM2B	1	1.75131e+16	0	0	1	1.75131e+16	0	1.07861e+16	Beta,0
CA14	2	3.50263e+16	2	3.50263e+16	0	0	0	7114277535517864	Beta,0
ELL2	4	7.00525e+16	4	7.00525e+16	0	0	0	2.17632e+16	Beta,0
XPA	2	3.50263e+16	0	0	2	3.50263e+16	0	8498172247294298	Beta,0
CLDN10	1	1.75131e+16	1	1.75131e+16	0	0	0	4.74899e+16	Beta,0
ZBTB33	1	1.75131e+16	0	0	1	1.75131e+16	0	9408071848703198	Beta,0
RELB	1	1.75131e+16	0	0	1	1.75131e+16	0	2756697799224878	Beta,0
MYB	2	3.50263e+16	0	0	2	3.50263e+16	0	8766238756934285	Beta,0
NFE2L1	3	5253940455341506	0	0	3	5253940455341506	0	235661545088181	Beta,0
HOXA1	1	1.75131e+16	0	0	1	1.75131e+16	0	2.32327e+16	Beta,0
ID1	2	3.50263e+16	2	3.50263e+16	0	0	0	1.44492e+16	Beta,0
H1-3	2	3.50263e+16	2	3.50263e+16	0	0	0	6333524635792464	Beta,0
SKAP1	2	3.50263e+16	2	3.50263e+16	0	0	0	7855956177236834	Beta,0
LEF1	2	3.50263e+16	0	0	2	3.50263e+16	0	3.67808e+16	Beta,0
MAST4	1	1.75131e+16	1	1.75131e+16	0	0	0	1510601772040895	Beta,0
NFYB	2	3.50263e+16	0	0	2	3.50263e+16	0	1.57971e+16	Beta,0
DRAP1	1	1.75131e+16	1	1.75131e+16	0	0	0	2183212632614586	Beta,0
MAPT	1	1.75131e+16	1	1.75131e+16	0	0	0	2.18061e+16	Beta,0
NOL4	1	1.75131e+16	1	1.75131e+16	0	0	0	1906000383230925	Beta,0
PEX5L	2	3.50263e+16	2	3.50263e+16	0	0	0	2.32948e+16	Beta,0
TLX1	1	1.75131e+16	0	0	1	1.75131e+16	0	8410458143498793	Beta,0
P2RY1	1	1.75131e+16	1	1.75131e+16	0	0	0	1.33603e+16	Beta,0
MID1IP1	1	1.75131e+16	1	1.75131e+16	0	0	0	1.90725e+16	Beta,0
CDKN1C	1	1.75131e+16	1	1.75131e+16	0	0	0	1483258568957941	Beta,0
GUCY1A1	1	1.75131e+16	1	1.75131e+16	0	0	0	805301014314254	Beta,0
ZNF283	1	1.75131e+16	0	0	1	1.75131e+16	0	1548559383325725	Beta,0
E2F4	1	1.75131e+16	0	0	1	1.75131e+16	0	1288647821998204	Beta,0
IRF2	1	1.75131e+16	0	0	1	1.75131e+16	0	1.96675e+16	Beta,0
PEG10	3	5253940455341506	3	5253940455341506	0	0	0	1.20016e+16	Beta,0
RGS2	1	1.75131e+16	1	1.75131e+16	0	0	0	7719566843701727	Beta,0
TSHZ1	1	1.75131e+16	1	1.75131e+16	0	0	0	2.47001e+16	Beta,0
E2F6	1	1.75131e+16	0	0	1	1.75131e+16	0	2.62792e+16	Beta,0
CALCOCO2	2	3.50263e+16	2	3.50263e+16	0	0	0	2582339564730792	Beta,0
ZFP36	1	1.75131e+16	1	1.75131e+16	0	0	0	6683960960037144	Beta,0
ZNF664	3	5253940455341506	3	5253940455341506	0	0	0	7047871828411328	Beta,0
UNC5D	1	1.75131e+16	1	1.75131e+16	0	0	0	6.46072e+16	Beta,0
CEBPD	1	1.75131e+16	0	0	1	1.75131e+16	0	6205713102976566	Beta,0
SETBP1	4	7.00525e+16	4	7.00525e+16	0	0	0	2.45073e+16	Beta,0
KCND2	3	5253940455341506	3	5253940455341506	0	0	0	2.42637e+16	Beta,0
UNC80	2	3.50263e+16	2	3.50263e+16	0	0	0	1.87956e+16	Beta,0
SLC37A4	1	1.75131e+16	1	1.75131e+16	0	0	0	2.07044e+16	Beta,0
AHR	3	5253940455341506	0	0	3	5253940455341506	0	1709998344854387	Beta,0
B3GAT2	4	7.00525e+16	4	7.00525e+16	0	0	0	2.38254e+16	Beta,0
CDK5R2	1	1.75131e+16	1	1.75131e+16	0	0	0	5850869832478308	Beta,0
PBX2	1	1.75131e+16	0	0	1	1.75131e+16	0	2123877263939308	Beta,0
FOXI3	1	1.75131e+16	0	0	1	1.75131e+16	0	9510132824804342	Beta,0
NFKB1	2	3.50263e+16	0	0	2	3.50263e+16	0	2.77338e+16	Beta,0
MEF2D	1	1.75131e+16	0	0	1	1.75131e+16	0	1.69851e+16	Beta,0
ERG	2	3.50263e+16	0	0	2	3.50263e+16	0	3.05799e+16	Beta,0
A1CF	2	3.50263e+16	2	3.50263e+16	0	0	0	1.41236e+16	Beta,0
SNAI1	1	1.75131e+16	0	0	1	1.75131e+16	0	1.12356e+16	Beta,0
PTPRD	2	3.50263e+16	2	3.50263e+16	0	0	0	6719543992592995	Beta,0
INSR	1	1.75131e+16	1	1.75131e+16	0	0	0	6944086053477098	Beta,0
ZNF768	1	1.75131e+16	0	0	1	1.75131e+16	0	1.22661e+16	Beta,0
TMED3	5	8756567425569177	5	8756567425569177	0	0	0	3.76849e+16	Beta,0
PLAGL2	1	1.75131e+16	0	0	1	1.75131e+16	0	7738596931120143	Beta,0
SMIM5	1	1.75131e+16	1	1.75131e+16	0	0	0	2.12689e+16	Beta,0
PHF1	1	1.75131e+16	0	0	1	1.75131e+16	0	8795774732119427	Beta,0
HIST1H2BD	2	3.50263e+16	2	3.50263e+16	0	0	0	6885454460282617	Beta,0
CDX1	2	3.50263e+16	0	0	2	3.50263e+16	0	3.73263e+16	Beta,0
DCLK1	1	1.75131e+16	1	1.75131e+16	0	0	0	2106692155853833	Beta,0
FBN1	1	1.75131e+16	1	1.75131e+16	0	0	0	3.14526e+16	Beta,0
MYCN	2	3.50263e+16	0	0	2	3.50263e+16	0	1.22394e+16	Beta,0
HLF	2	3.50263e+16	0	0	2	3.50263e+16	0	7394717306441118	Beta,0
USF1	2	3.50263e+16	0	0	2	3.50263e+16	0	889278251240776	Beta,0
CEBPB	2	3.50263e+16	0	0	2	3.50263e+16	0	5894200477803955	Beta,0
YY1	1	1.75131e+16	0	0	1	1.75131e+16	0	6495321669279527	Beta,0
TFF2	1	1.75131e+16	1	1.75131e+16	0	0	0	3.5795e+16	Beta,0
HEYL	4	7.00525e+16	0	0	4	7.00525e+16	0	2.33206e+16	Beta,0
CXCL12	2	3.50263e+16	2	3.50263e+16	0	0	0	2.4756e+16	Beta,0
RFX5	1	1.75131e+16	0	0	1	1.75131e+16	0	6451662839067595	Beta,0
SGTB	1	1.75131e+16	1	1.75131e+16	0	0	0	1735163860420725	Beta,0
PTF1A	1	1.75131e+16	0	0	1	1.75131e+16	0	1.18186e+16	Beta,0
ARNT	2	3.50263e+16	0	0	2	3.50263e+16	0	5990660090234911	Beta,0
HSPA5	1	1.75131e+16	1	1.75131e+16	0	0	0	1.43146e+16	Beta,0
PNLIPRP2	1	1.75131e+16	1	1.75131e+16	0	0	0	2.85683e+16	Beta,0
ARHGEF38	1	1.75131e+16	1	1.75131e+16	0	0	0	7348372134826037	Beta,0
GNAI1	1	1.75131e+16	1	1.75131e+16	0	0	0	3267164553022104	Beta,0
SYT13	1	1.75131e+16	1	1.75131e+16	0	0	0	7.33335e+16	Beta,0
NEUROD4	1	1.75131e+16	0	0	1	1.75131e+16	0	1.69128e+16	Beta,0
SCIN	1	1.75131e+16	1	1.75131e+16	0	0	0	5964256192028915	Beta,0
MLX	1	1.75131e+16	0	0	1	1.75131e+16	0	5468418017558517	Beta,0
CEL	2	3.50263e+16	2	3.50263e+16	0	0	0	1.04703e+16	Beta,0
SPI1	2	3.50263e+16	0	0	2	3.50263e+16	0	1587371901428273	Beta,0
SON	1	1.75131e+16	1	1.75131e+16	0	0	0	1.90591e+16	Beta,0
TP73	2	3.50263e+16	0	0	2	3.50263e+16	0	5.06873e+16	Beta,0
KCNIP4	1	1.75131e+16	1	1.75131e+16	0	0	0	1.67127e+16	Beta,0
ID2	1	1.75131e+16	1	1.75131e+16	0	0	0	1.84134e+16	Beta,0
APLP1	1	1.75131e+16	1	1.75131e+16	0	0	0	6458559014128742	Beta,0
CDH17	1	1.75131e+16	1	1.75131e+16	0	0	0	7164956906822066	Beta,0
UBP1	1	1.75131e+16	0	0	1	1.75131e+16	0	2.55796e+16	Beta,0
GMEB2	1	1.75131e+16	0	0	1	1.75131e+16	0	1.99329e+16	Beta,0
HOXC5	1	1.75131e+16	0	0	1	1.75131e+16	0	1.99022e+16	Beta,0
TNR	1	1.75131e+16	1	1.75131e+16	0	0	0	2093387688415486	Beta,0
TFAP2B	2	3.50263e+16	0	0	2	3.50263e+16	0	2.55309e+16	Beta,0
POGK	1	1.75131e+16	0	0	1	1.75131e+16	0	1.98601e+16	Beta,0
MGA	1	1.75131e+16	0	0	1	1.75131e+16	0	2.3464e+16	Beta,0
RPH3AL	1	1.75131e+16	1	1.75131e+16	0	0	0	1646051532691989	Beta,0
OPCML	1	1.75131e+16	1	1.75131e+16	0	0	0	2954970769705912	Beta,0
THYN1	1	1.75131e+16	1	1.75131e+16	0	0	0	7624461802713849	Beta,0
FAM20A	1	1.75131e+16	1	1.75131e+16	0	0	0	1.86594e+16	Beta,0
ZNF713	1	1.75131e+16	0	0	1	1.75131e+16	0	79437116482341	Beta,0
ETV3	2	3.50263e+16	0	0	2	3.50263e+16	0	2837025013478067	Beta,0
PIN1	1	1.75131e+16	1	1.75131e+16	0	0	0	1178763450982887	Beta,0
RBP7	1	1.75131e+16	1	1.75131e+16	0	0	0	1.99796e+16	Beta,0
GULP1	1	1.75131e+16	1	1.75131e+16	0	0	0	2920436854295422	Beta,0
ERP27	1	1.75131e+16	1	1.75131e+16	0	0	0	2721601680411964	Beta,0
SMAD4	3	5253940455341506	0	0	3	5253940455341506	0	3620023143441219	Beta,0
NCOA2	1	1.75131e+16	1	1.75131e+16	0	0	0	1.26692e+16	Beta,0
RAB3C	1	1.75131e+16	1	1.75131e+16	0	0	0	3.08845e+16	Beta,0
TCF12	5	8756567425569177	2	3.50263e+16	3	5253940455341506	3200	2727511788417414	Beta,0
KIAA0408	1	1.75131e+16	1	1.75131e+16	0	0	0	6244433902021595	Beta,0
RXRG	1	1.75131e+16	0	0	1	1.75131e+16	0	5378038335046803	Beta,0
DDAH2	1	1.75131e+16	1	1.75131e+16	0	0	0	1.70708e+16	Beta,0
HOXA5	1	1.75131e+16	0	0	1	1.75131e+16	0	1090654011143317	Beta,0
ID4	1	1.75131e+16	1	1.75131e+16	0	0	0	1.60058e+16	Beta,0
ZFP14	1	1.75131e+16	0	0	1	1.75131e+16	0	9913006583030024	Beta,0
DUT	1	1.75131e+16	1	1.75131e+16	0	0	0	5953720958855378	Beta,0
MFAP4	1	1.75131e+16	1	1.75131e+16	0	0	0	1.13875e+16	Beta,0
ZNF282	2	3.50263e+16	0	0	2	3.50263e+16	0	1.15775e+16	Beta,0
PITX2	1	1.75131e+16	0	0	1	1.75131e+16	0	1.07122e+16	Beta,0
MSX1	1	1.75131e+16	0	0	1	1.75131e+16	0	7576155392213746	Beta,0
SOX6	1	1.75131e+16	1	1.75131e+16	0	0	0	6738390369958293	Beta,0
ALX3	1	1.75131e+16	0	0	1	1.75131e+16	0	7571120904639456	Beta,0
CHST9	1	1.75131e+16	1	1.75131e+16	0	0	0	5621768655836653	Beta,0
THAP1	1	1.75131e+16	0	0	1	1.75131e+16	0	9596013915944862	Beta,0
AHCYL1	1	1.75131e+16	1	1.75131e+16	0	0	0	7156548529223927	Beta,0
ZFP64	1	1.75131e+16	0	0	1	1.75131e+16	0	9481883128069948	Beta,0
SNAP25	1	1.75131e+16	1	1.75131e+16	0	0	0	1.85308e+16	Beta,0
GATA5	1	1.75131e+16	0	0	1	1.75131e+16	0	7514806239277308	Beta,0
ZNF383	1	1.75131e+16	0	0	1	1.75131e+16	0	7454641262331502	Beta,0
PRRX2	1	1.75131e+16	0	0	1	1.75131e+16	0	1.51816e+16	Beta,0
RARG	1	1.75131e+16	0	0	1	1.75131e+16	0	5214646526378453	Beta,0
ZNF260	1	1.75131e+16	0	0	1	1.75131e+16	0	2071910224741029	Beta,0
CACNB2	1	1.75131e+16	1	1.75131e+16	0	0	0	1.17421e+16	Beta,0
JAZF1	1	1.75131e+16	1	1.75131e+16	0	0	0	1.17246e+16	Beta,0
SNAI2	1	1.75131e+16	0	0	1	1.75131e+16	0	4826870240678066	Beta,0
MEIS2	41	726950354609929	21	3723404255319149	20	3546099290780142	28840	6055575689931335	Beta,1
TTR	56	9929078014184398	56	9929078014184398	0	0	0	10	Beta,1
NEUROG3	18	3.19149e+16	11	1950354609929078	7	1.24113e+16	4260	4041737127573868	Beta,1
CDX2	13	2304964539007092	0	0	13	2304964539007092	0	3.39619e+16	Beta,1
EGR1	30	5319148936170213	4	7.0922e+16	26	4609929078014184	17490	3213278937707322	Beta,1
FOS	29	5.14184e+16	20	3546099290780142	9	1.59574e+16	15590	2862576548990279	Beta,1
LMX1A	10	1773049645390071	0	0	10	1773049645390071	0	1.00101e+16	Beta,1
CHGB	62	1099290780141844	62	1099290780141844	0	0	0	3830384984975354	Beta,1
SOX5	13	2304964539007092	0	0	13	2304964539007092	0	1.37296e+16	Beta,1
MITF	3	5319148936170213	0	0	3	5319148936170213	0	1914516207302438	Beta,1
G6PC2	30	5319148936170213	30	5319148936170213	0	0	0	1.97215e+16	Beta,1
ATF1	15	2.65957e+16	0	0	15	2.65957e+16	0	2.91181e+16	Beta,1
JUNB	13	2304964539007092	3	5319148936170213	10	1773049645390071	1260	1.94238e+16	Beta,1
MAFA	6	1.06383e+16	0	0	6	1.06383e+16	0	7841958026844703	Beta,1
SIX6	10	1773049645390071	0	0	10	1773049645390071	0	2589045374295408	Beta,1
RFX6	17	3.01418e+16	0	0	17	3.01418e+16	0	2515931672897869	Beta,1
NR4A2	46	8156028368794327	0	0	46	8156028368794327	0	4184637987794607	Beta,1
IRF7	11	1950354609929078	1	1.77305e+16	10	1773049645390071	2630	6.24411e+16	Beta,1
ALDOB	32	5673758865248227	32	5673758865248227	0	0	0	1.68076e+16	Beta,1
HSF1	29	5.14184e+16	0	0	29	5.14184e+16	0	3013498022163953	Beta,1
BCL11A	4	7.0922e+16	0	0	4	7.0922e+16	0	5061465905969536	Beta,1
SCGN	52	9219858156028368	52	9219858156028368	0	0	0	296810751490729	Beta,1
NEUROD1	3	5319148936170213	2	3.5461e+16	1	1.77305e+16	30	1.46104e+16	Beta,1
RFX1	5	8865248226950355	0	0	5	8865248226950355	0	1.46944e+16	Beta,1
CDX4	4	7.0922e+16	0	0	4	7.0922e+16	0	1.55106e+16	Beta,1
MEF2B	2	3.5461e+16	0	0	2	3.5461e+16	0	1.24558e+16	Beta,1
ASCL2	19	3368794326241135	2	3.5461e+16	17	3.01418e+16	700	7139516724182425	Beta,1
ZEB1	16	2.83688e+16	4	7.0922e+16	12	2127659574468085	2180	9048288226978568	Beta,1
SCG2	36	6382978723404255	36	6382978723404255	0	0	0	2098210112596972	Beta,1
RORC	32	5673758865248227	0	0	32	5673758865248227	0	2516859949069368	Beta,1
TXNIP	29	5.14184e+16	29	5.14184e+16	0	0	0	1.88792e+16	Beta,1
PDX1	15	2.65957e+16	10	1773049645390071	5	8865248226950355	2520	1.3221e+16	Beta,1
GPX3	29	5.14184e+16	29	5.14184e+16	0	0	0	2.19081e+16	Beta,1
CTCF	6	1.06383e+16	0	0	6	1.06383e+16	0	1.3052e+16	Beta,1
TFDP2	46	8156028368794327	0	0	46	8156028368794327	0	2.65154e+16	Beta,1
SELENOM	34	6028368794326241	34	6028368794326241	0	0	0	1.36554e+16	Beta,1
EMB	12	2127659574468085	12	2127659574468085	0	0	0	9788588829025204	Beta,1
CHGA	56	9929078014184398	56	9929078014184398	0	0	0	3.18299e+16	Beta,1
MDK	24	425531914893617	24	425531914893617	0	0	0	1.47609e+16	Beta,1
PPP1R1A	31	549645390070922	31	549645390070922	0	0	0	2.08749e+16	Beta,1
SOX3	4	7.0922e+16	0	0	4	7.0922e+16	0	6915945050288805	Beta,1
CPB2	24	425531914893617	24	425531914893617	0	0	0	197389082038371	Beta,1
CREB3	19	3368794326241135	0	0	19	3368794326241135	0	1.04376e+16	Beta,1
RORA	49	8687943262411348	1	1.77305e+16	48	851063829787234	440	1.98179e+16	Beta,1
ANXA2	82	1453900709219858	82	1453900709219858	0	0	0	3533924007155378	Beta,1
NFE2L2	5	8865248226950355	0	0	5	8865248226950355	0	3.83505e+16	Beta,1
GPR137B	35	6205673758865248	35	6205673758865248	0	0	0	1730323213279992	Beta,1
RARG	8	1.41844e+16	0	0	8	1.41844e+16	0	1.62392e+16	Beta,1
GATA4	10	1773049645390071	0	0	10	1773049645390071	0	6939974160870566	Beta,1
MAX	9	1.59574e+16	0	0	9	1.59574e+16	0	6.2399e+16	Beta,1
KLF15	17	3.01418e+16	0	0	17	3.01418e+16	0	1.22675e+16	Beta,1
ATF3	4	7.0922e+16	0	0	4	7.0922e+16	0	1.33469e+16	Beta,1
FOXN3	23	4.07801e+16	0	0	23	4.07801e+16	0	1.48508e+16	Beta,1
CPE	33	5851063829787234	33	5851063829787234	0	0	0	2.10991e+16	Beta,1
PPARA	12	2127659574468085	0	0	12	2127659574468085	0	1513849379906856	Beta,1
FOSL2	5	8865248226950355	0	0	5	8865248226950355	0	6636176113318913	Beta,1
KLF4	4	7.0922e+16	0	0	4	7.0922e+16	0	4.13572e+16	Beta,1
BBX	20	3546099290780142	0	0	20	3546099290780142	0	1.56647e+16	Beta,1
UPK3A	33	5851063829787234	33	5851063829787234	0	0	0	1.90974e+16	Beta,1
NEUROD2	1	1.77305e+16	0	0	1	1.77305e+16	0	93390475433748	Beta,1
THRB	23	4.07801e+16	0	0	23	4.07801e+16	0	1.044e+16	Beta,1
CITED1	20	3546099290780142	20	3546099290780142	0	0	0	1.91765e+16	Beta,1
MT3	15	2.65957e+16	15	2.65957e+16	0	0	0	1.09173e+16	Beta,1
EGR3	33	5851063829787234	0	0	33	5851063829787234	0	2.47064e+16	Beta,1
ZNF385D	14	2.48227e+16	0	0	14	2.48227e+16	0	1.16746e+16	Beta,1
RFX2	7	1.24113e+16	0	0	7	1.24113e+16	0	9352404140067808	Beta,1
TCF4	10	1773049645390071	0	0	10	1773049645390071	0	5296345183482585	Beta,1
ERO1B	34	6028368794326241	34	6028368794326241	0	0	0	1.71752e+16	Beta,1
ETV1	23	4.07801e+16	3	5319148936170213	20	3546099290780142	3200	1.47678e+16	Beta,1
DIRAS3	23	4.07801e+16	23	4.07801e+16	0	0	0	9126386587088502	Beta,1
PAX6	31	549645390070922	2	3.5461e+16	29	5.14184e+16	10540	2.08108e+16	Beta,1
NEUROG1	2	3.5461e+16	0	0	2	3.5461e+16	0	9416768765383016	Beta,1
MEF2C	2	3.5461e+16	0	0	2	3.5461e+16	0	1.01079e+16	Beta,1
NR3C2	21	3723404255319149	0	0	21	3723404255319149	0	8229792822820255	Beta,1
MEIS1	1	1.77305e+16	0	0	1	1.77305e+16	0	1.85032e+16	Beta,1
DUSP1	7	1.24113e+16	7	1.24113e+16	0	0	0	5843028785273422	Beta,1
UBP1	2	3.5461e+16	0	0	2	3.5461e+16	0	1948858736728677	Beta,1
ESM1	19	3368794326241135	19	3368794326241135	0	0	0	1.33506e+16	Beta,1
FOXP1	12	2127659574468085	0	0	12	2127659574468085	0	7901292671581628	Beta,1
CRYBA2	13	2304964539007092	13	2304964539007092	0	0	0	2.62668e+16	Beta,1
SCG5	34	6028368794326241	34	6028368794326241	0	0	0	1.64057e+16	Beta,1
CREB3L2	10	1773049645390071	0	0	10	1773049645390071	0	1.04835e+16	Beta,1
SMAD9	37	6560283687943262	0	0	37	6560283687943262	0	1.94222e+16	Beta,1
KLF12	7	1.24113e+16	0	0	7	1.24113e+16	0	8386084356869829	Beta,1
NFE2	5	8865248226950355	3	5319148936170213	2	3.5461e+16	40	8307075497124025	Beta,1
CREB5	7	1.24113e+16	0	0	7	1.24113e+16	0	7620878243608556	Beta,1
ASB9	32	5673758865248227	32	5673758865248227	0	0	0	2.0002e+16	Beta,1
NFE2L3	3	5319148936170213	0	0	3	5319148936170213	0	4429836027663337	Beta,1
PCNA	8	1.41844e+16	8	1.41844e+16	0	0	0	2.83547e+16	Beta,1
ELF1	36	6382978723404255	0	0	36	6382978723404255	0	2592649818976791	Beta,1
ST3GAL6	15	2.65957e+16	15	2.65957e+16	0	0	0	1.01687e+16	Beta,1
TFDP1	33	5851063829787234	0	0	33	5851063829787234	0	2272120458235606	Beta,1
SLC3A2	23	4.07801e+16	23	4.07801e+16	0	0	0	1.55998e+16	Beta,1
PLAGL1	25	4.43262e+16	10	1773049645390071	15	2.65957e+16	17000	9826641488636804	Beta,1
NR2F6	9	1.59574e+16	0	0	9	1.59574e+16	0	6950490932389229	Beta,1
TP53	3	5319148936170213	0	0	3	5319148936170213	0	2.64797e+16	Beta,1
TGIF2	2	3.5461e+16	0	0	2	3.5461e+16	0	8981076494529204	Beta,1
PAX4	14	2.48227e+16	0	0	14	2.48227e+16	0	1.03081e+16	Beta,1
ZNF704	9	1.59574e+16	0	0	9	1.59574e+16	0	8431379274456499	Beta,1
ZBTB7A	12	2127659574468085	0	0	12	2127659574468085	0	7081353306787985	Beta,1
ZNF250	7	1.24113e+16	0	0	7	1.24113e+16	0	4.27135e+16	Beta,1
ZBTB20	6	1.06383e+16	6	1.06383e+16	0	0	0	3319332344638112	Beta,1
TGIF1	21	3723404255319149	0	0	21	3723404255319149	0	1675573049818443	Beta,1
IRX3	4	7.0922e+16	0	0	4	7.0922e+16	0	1.11469e+16	Beta,1
IRX6	2	3.5461e+16	0	0	2	3.5461e+16	0	815872696490566	Beta,1
HNF4A	19	3368794326241135	0	0	19	3368794326241135	0	1.794e+16	Beta,1
FOXO1	14	2.48227e+16	2	3.5461e+16	12	2127659574468085	3030	5913495699226248	Beta,1
PCSK2	26	4609929078014184	26	4609929078014184	0	0	0	1.4793e+16	Beta,1
TEF	3	5319148936170213	0	0	3	5319148936170213	0	1.66253e+16	Beta,1
STAT1	8	1.41844e+16	0	0	8	1.41844e+16	0	3014647267836981	Beta,1
JDP2	4	7.0922e+16	0	0	4	7.0922e+16	0	4938437725598032	Beta,1
E2F4	15	2.65957e+16	0	0	15	2.65957e+16	0	114170122445934	Beta,1
FOXA2	4	7.0922e+16	0	0	4	7.0922e+16	0	8797828283788196	Beta,1
RBP2	11	1950354609929078	11	1950354609929078	0	0	0	4777120052714891	Beta,1
KLF7	11	1950354609929078	0	0	11	1950354609929078	0	4710587000924187	Beta,1
KLF10	18	3.19149e+16	0	0	18	3.19149e+16	0	1.00207e+16	Beta,1
CDC5L	6	1.06383e+16	0	0	6	1.06383e+16	0	2230128497068938	Beta,1
ISL1	12	2127659574468085	9	1.59574e+16	3	5319148936170213	2710	6508209435412066	Beta,1
SLC30A8	13	2304964539007092	13	2304964539007092	0	0	0	734410660137714	Beta,1
ZNF467	19	3368794326241135	0	0	19	3368794326241135	0	1.05998e+16	Beta,1
ETS1	19	3368794326241135	0	0	19	3368794326241135	0	9662558124235988	Beta,1
SLC7A8	18	3.19149e+16	18	3.19149e+16	0	0	0	1.03052e+16	Beta,1
NR3C1	15	2.65957e+16	0	0	15	2.65957e+16	0	6.02394e+16	Beta,1
FOSB	13	2304964539007092	4	7.0922e+16	9	1.59574e+16	1330	1.06317e+16	Beta,1
DMRT1	1	1.77305e+16	0	0	1	1.77305e+16	0	2.47396e+16	Beta,1
NFATC2	3	5319148936170213	0	0	3	5319148936170213	0	3754901926405796	Beta,1
ZFY	4	7.0922e+16	0	0	4	7.0922e+16	0	4.18497e+16	Beta,1
ACVR1C	23	4.07801e+16	23	4.07801e+16	0	0	0	1.44657e+16	Beta,1
PTGER3	7	1.24113e+16	7	1.24113e+16	0	0	0	4401662836157505	Beta,1
NR2F1	5	8865248226950355	0	0	5	8865248226950355	0	9483276310348808	Beta,1
SMAD5	9	1.59574e+16	0	0	9	1.59574e+16	0	7169268503096529	Beta,1
COX4I2	3	5319148936170213	3	5319148936170213	0	0	0	7495285191773717	Beta,1
KLF11	11	1950354609929078	0	0	11	1950354609929078	0	9861227048676696	Beta,1
ZKSCAN1	1	1.77305e+16	0	0	1	1.77305e+16	0	1.29809e+16	Beta,1
PAPPA2	18	3.19149e+16	18	3.19149e+16	0	0	0	5.74561e+16	Beta,1
NR1H4	19	3368794326241135	0	0	19	3368794326241135	0	1.18423e+16	Beta,1
NR2F2	9	1.59574e+16	0	0	9	1.59574e+16	0	1.1513e+16	Beta,1
HIGD1A	21	3723404255319149	21	3723404255319149	0	0	0	8220806124158674	Beta,1
RELA	2	3.5461e+16	0	0	2	3.5461e+16	0	2636272895206104	Beta,1
IRF3	5	8865248226950355	0	0	5	8865248226950355	0	4.92073e+16	Beta,1
CHIA	24	425531914893617	24	425531914893617	0	0	0	1.04977e+16	Beta,1
FEV	17	3.01418e+16	4	7.0922e+16	13	2304964539007092	8980	3.10399e+16	Beta,1
MAZ	13	2304964539007092	0	0	13	2304964539007092	0	7124356726772267	Beta,1
NME2	10	1773049645390071	10	1773049645390071	0	0	0	4368194537029031	Beta,1
KLF3	9	1.59574e+16	0	0	9	1.59574e+16	0	5918604515194179	Beta,1
SMU1	1	1.77305e+16	1	1.77305e+16	0	0	0	2.11915e+16	Beta,1
CUX1	3	5319148936170213	0	0	3	5319148936170213	0	5402598931334896	Beta,1
CXXC1	2	3.5461e+16	0	0	2	3.5461e+16	0	2.27341e+16	Beta,1
ZNF75D	2	3.5461e+16	0	0	2	3.5461e+16	0	8063913515823501	Beta,1
GSTM3	22	3900709219858156	22	3900709219858156	0	0	0	1.22085e+16	Beta,1
RXRB	3	5319148936170213	0	0	3	5319148936170213	0	8335505435014129	Beta,1
NFATC4	1	1.77305e+16	0	0	1	1.77305e+16	0	1929022518887519	Beta,1
PTN	13	2304964539007092	13	2304964539007092	0	0	0	7543842811906458	Beta,1
ZBTB37	7	1.24113e+16	0	0	7	1.24113e+16	0	4434905595733382	Beta,1
IGFBP2	25	4.43262e+16	25	4.43262e+16	0	0	0	9432196488877158	Beta,1
ETV5	21	3723404255319149	0	0	21	3723404255319149	0	1.19548e+16	Beta,1
GTF3A	4	7.0922e+16	0	0	4	7.0922e+16	0	2.81842e+16	Beta,1
E2F1	21	3723404255319149	0	0	21	3723404255319149	0	5240583772857489	Beta,1
PCLAF	4	7.0922e+16	4	7.0922e+16	0	0	0	4580554595689545	Beta,1
UCHL1	18	3.19149e+16	18	3.19149e+16	0	0	0	7086111280146255	Beta,1
B2M	23	4.07801e+16	23	4.07801e+16	0	0	0	986513847388919	Beta,1
SCRT1	2	3.5461e+16	0	0	2	3.5461e+16	0	4.61487e+16	Beta,1
ATF6	1	1.77305e+16	0	0	1	1.77305e+16	0	8679374096856976	Beta,1
ELF2	7	1.24113e+16	0	0	7	1.24113e+16	0	3.11015e+16	Beta,1
KLF6	9	1.59574e+16	0	0	9	1.59574e+16	0	6236387792099187	Beta,1
CIC	2	3.5461e+16	0	0	2	3.5461e+16	0	2.22169e+16	Beta,1
TCF7L2	6	1.06383e+16	0	0	6	1.06383e+16	0	4.07718e+16	Beta,1
REST	2	3.5461e+16	0	0	2	3.5461e+16	0	3319602208056224	Beta,1
MESP2	2	3.5461e+16	0	0	2	3.5461e+16	0	6994797008742541	Beta,1
PAX1	1	1.77305e+16	0	0	1	1.77305e+16	0	1.76523e+16	Beta,1
NKX6-1	6	1.06383e+16	0	0	6	1.06383e+16	0	3.43891e+16	Beta,1
CACNA2D1	13	2304964539007092	13	2304964539007092	0	0	0	7442274616031773	Beta,1
KCND2	12	2127659574468085	12	2127659574468085	0	0	0	7316906046561239	Beta,1
ELF3	11	1950354609929078	0	0	11	1950354609929078	0	5091040300770597	Beta,1
SP4	3	5319148936170213	0	0	3	5319148936170213	0	3492931617255392	Beta,1
POU3F1	3	5319148936170213	0	0	3	5319148936170213	0	349148369225194	Beta,1
PEG10	24	425531914893617	24	425531914893617	0	0	0	6606822165168591	Beta,1
EGR2	7	1.24113e+16	0	0	7	1.24113e+16	0	6834970957936934	Beta,1
THAP1	1	1.77305e+16	0	0	1	1.77305e+16	0	1.79125e+16	Beta,1
BCL11B	3	5319148936170213	0	0	3	5319148936170213	0	2.92699e+16	Beta,1
NR2C1	3	5319148936170213	0	0	3	5319148936170213	0	2663940407001192	Beta,1
TMED3	20	3546099290780142	20	3546099290780142	0	0	0	1.06072e+16	Beta,1
TCF12	8	1.41844e+16	0	0	8	1.41844e+16	0	2809538137314585	Beta,1
ZBTB7B	4	7.0922e+16	0	0	4	7.0922e+16	0	3.48919e+16	Beta,1
NR4A3	7	1.24113e+16	0	0	7	1.24113e+16	0	1.1312e+16	Beta,1
DUT	4	7.0922e+16	4	7.0922e+16	0	0	0	5917089672627713	Beta,1
NR6A1	1	1.77305e+16	0	0	1	1.77305e+16	0	1169213732602597	Beta,1
NFYB	3	5319148936170213	0	0	3	5319148936170213	0	2.14724e+16	Beta,1
TMEM52	2	3.5461e+16	2	3.5461e+16	0	0	0	6321952821150889	Beta,1
SYT4	10	1773049645390071	10	1773049645390071	0	0	0	6.07067e+16	Beta,1
KLF13	12	2127659574468085	0	0	12	2127659574468085	0	5966737739548009	Beta,1
MNX1	5	8865248226950355	0	0	5	8865248226950355	0	3742876884783684	Beta,1
TMEM176A	9	1.59574e+16	9	1.59574e+16	0	0	0	3817007962823959	Beta,1
POU2F1	1	1.77305e+16	0	0	1	1.77305e+16	0	1.1507e+16	Beta,1
ARX	5	8865248226950355	0	0	5	8865248226950355	0	4530636463117515	Beta,1
FOXK2	5	8865248226950355	0	0	5	8865248226950355	0	5136247401968727	Beta,1
ZSCAN30	3	5319148936170213	0	0	3	5319148936170213	0	4181829600066126	Beta,1
ELP4	27	4.78723e+16	27	4.78723e+16	0	0	0	1.01928e+16	Beta,1
ZNF331	2	3.5461e+16	0	0	2	3.5461e+16	0	6208726902373092	Beta,1
TM4SF4	10	1773049645390071	10	1773049645390071	0	0	0	5382288802853053	Beta,1
LGALS2	16	2.83688e+16	16	2.83688e+16	0	0	0	7304235979170508	Beta,1
MFAP4	8	1.41844e+16	8	1.41844e+16	0	0	0	365964594326322	Beta,1
ETV2	21	3723404255319149	0	0	21	3723404255319149	0	1.049e+16	Beta,1
DLX2	3	5319148936170213	0	0	3	5319148936170213	0	2.24676e+16	Beta,1
TYMS	1	1.77305e+16	1	1.77305e+16	0	0	0	2.9343e+16	Beta,1
KRT7	4	7.0922e+16	4	7.0922e+16	0	0	0	1.15476e+16	Beta,1
TUSC3	8	1.41844e+16	8	1.41844e+16	0	0	0	3842241458112836	Beta,1
RAB26	11	1950354609929078	11	1950354609929078	0	0	0	5091920137966755	Beta,1
RARA	2	3.5461e+16	0	0	2	3.5461e+16	0	2.34853e+16	Beta,1
SIX4	2	3.5461e+16	0	0	2	3.5461e+16	0	5.80722e+16	Beta,1
LSAMP	19	3368794326241135	19	3368794326241135	0	0	0	1086746455383664	Beta,1
TCF21	1	1.77305e+16	0	0	1	1.77305e+16	0	1.63571e+16	Beta,1
MBNL2	1	1.77305e+16	0	0	1	1.77305e+16	0	19445438896485	Beta,1
ELF4	6	1.06383e+16	0	0	6	1.06383e+16	0	281516768487038	Beta,1
CXCL12	7	1.24113e+16	7	1.24113e+16	0	0	0	2.88143e+16	Beta,1
CREM	7	1.24113e+16	0	0	7	1.24113e+16	0	8386716680144606	Beta,1
TM4SF5	9	1.59574e+16	9	1.59574e+16	0	0	0	5.28225e+16	Beta,1
NFIC	4	7.0922e+16	0	0	4	7.0922e+16	0	1.43969e+16	Beta,1
MECP2	10	1773049645390071	0	0	10	1773049645390071	0	5137060424702878	Beta,1
DACH1	13	2304964539007092	13	2304964539007092	0	0	0	5.91416e+16	Beta,1
GATA6	10	1773049645390071	0	0	10	1773049645390071	0	7713929399535835	Beta,1
SOX13	2	3.5461e+16	0	0	2	3.5461e+16	0	2.19813e+16	Beta,1
RBP7	4	7.0922e+16	4	7.0922e+16	0	0	0	2.65483e+16	Beta,1
IRF2	1	1.77305e+16	0	0	1	1.77305e+16	0	3049301349632493	Beta,1
KLF5	6	1.06383e+16	0	0	6	1.06383e+16	0	3416812998351324	Beta,1
BTBD17	10	1773049645390071	10	1773049645390071	0	0	0	499576712272469	Beta,1
ZNF566	1	1.77305e+16	0	0	1	1.77305e+16	0	186554832041027	Beta,1
HSPH1	1	1.77305e+16	1	1.77305e+16	0	0	0	1.68779e+16	Beta,1
ETV3	6	1.06383e+16	0	0	6	1.06383e+16	0	3791023069507492	Beta,1
NFIA	2	3.5461e+16	0	0	2	3.5461e+16	0	2.24341e+16	Beta,1
EOMES	1	1.77305e+16	0	0	1	1.77305e+16	0	1.82962e+16	Beta,1
ANXA10	9	1.59574e+16	9	1.59574e+16	0	0	0	5757008503055077	Beta,1
FAM162B	5	8865248226950355	5	8865248226950355	0	0	0	1.6948e+16	Beta,1
SKAP1	11	1950354609929078	11	1950354609929078	0	0	0	5024924830598098	Beta,1
PCSK1	7	1.24113e+16	7	1.24113e+16	0	0	0	3.87831e+16	Beta,1
TFAP2C	2	3.5461e+16	0	0	2	3.5461e+16	0	2.3017e+16	Beta,1
SMAD3	12	2127659574468085	0	0	12	2127659574468085	0	8446002274796384	Beta,1
AHR	2	3.5461e+16	0	0	2	3.5461e+16	0	1.24041e+16	Beta,1
HMGN3	8	1.41844e+16	8	1.41844e+16	0	0	0	4242674525188518	Beta,1
TAC1	4	7.0922e+16	4	7.0922e+16	0	0	0	4199175521949897	Beta,1
ARID3B	3	5319148936170213	0	0	3	5319148936170213	0	200408925200506	Beta,1
ATF2	2	3.5461e+16	0	0	2	3.5461e+16	0	3.45637e+16	Beta,1
CREB1	6	1.06383e+16	0	0	6	1.06383e+16	0	5395602938026107	Beta,1
KCNK16	10	1773049645390071	10	1773049645390071	0	0	0	6103186147215237	Beta,1
NR2C2	6	1.06383e+16	0	0	6	1.06383e+16	0	9390723919333148	Beta,1
FOXO4	3	5319148936170213	0	0	3	5319148936170213	0	2.08312e+16	Beta,1
STAT3	3	5319148936170213	0	0	3	5319148936170213	0	1.68553e+16	Beta,1
FOXP4	5	8865248226950355	0	0	5	8865248226950355	0	1.43371e+16	Beta,1
NHLH1	1	1.77305e+16	0	0	1	1.77305e+16	0	1768868338126892	Beta,1
ROBO2	3	5319148936170213	3	5319148936170213	0	0	0	1.53407e+16	Beta,1
HHEX	2	3.5461e+16	2	3.5461e+16	0	0	0	1.06595e+16	Beta,1
GADD45G	1	1.77305e+16	1	1.77305e+16	0	0	0	3.5364e+16	Beta,1
PHF1	2	3.5461e+16	0	0	2	3.5461e+16	0	2.20918e+16	Beta,1
HMGB2	5	8865248226950355	5	8865248226950355	0	0	0	457870290557306	Beta,1
PCSK1N	24	425531914893617	24	425531914893617	0	0	0	1082064482600578	Beta,1
DNMT1	8	1.41844e+16	0	0	8	1.41844e+16	0	542680454348893	Beta,1
DBP	2	3.5461e+16	0	0	2	3.5461e+16	0	934888555213274	Beta,1
APOBEC2	2	3.5461e+16	2	3.5461e+16	0	0	0	3.69643e+16	Beta,1
EDIL3	8	1.41844e+16	8	1.41844e+16	0	0	0	580743694651819	Beta,1
IGFBP5	1	1.77305e+16	1	1.77305e+16	0	0	0	1.67111e+16	Beta,1
PKNOX1	1	1.77305e+16	0	0	1	1.77305e+16	0	4.85651e+16	Beta,1
HOXB2	3	5319148936170213	0	0	3	5319148936170213	0	2.76833e+16	Beta,1
TOX	10	1773049645390071	10	1773049645390071	0	0	0	588248061693582	Beta,1
GULP1	7	1.24113e+16	7	1.24113e+16	0	0	0	5991159458951702	Beta,1
E2F7	7	1.24113e+16	0	0	7	1.24113e+16	0	1467228437557868	Beta,1
DDC	2	3.5461e+16	2	3.5461e+16	0	0	0	4.91066e+16	Beta,1
LIN28B	3	5319148936170213	0	0	3	5319148936170213	0	894186142221532	Beta,1
XBP1	12	2127659574468085	6	1.06383e+16	6	1.06383e+16	830	8958792717372557	Beta,1
CADM2	2	3.5461e+16	2	3.5461e+16	0	0	0	7121808244291054	Beta,1
TET1	1	1.77305e+16	0	0	1	1.77305e+16	0	2.86361e+16	Beta,1
CDX1	2	3.5461e+16	0	0	2	3.5461e+16	0	632816745077353	Beta,1
NFYC	4	7.0922e+16	0	0	4	7.0922e+16	0	1605998805293444	Beta,1
CLOCK	1	1.77305e+16	0	0	1	1.77305e+16	0	1.49192e+16	Beta,1
MTF2	7	1.24113e+16	0	0	7	1.24113e+16	0	4690040890558616	Beta,1
IRF8	2	3.5461e+16	0	0	2	3.5461e+16	0	1085077310737938	Beta,1
FOXA3	5	8865248226950355	0	0	5	8865248226950355	0	6617051085544018	Beta,1
ZNF169	3	5319148936170213	0	0	3	5319148936170213	0	5415065124250927	Beta,1
SMAD4	1	1.77305e+16	0	0	1	1.77305e+16	0	1.6435e+16	Beta,1
PPARG	5	8865248226950355	0	0	5	8865248226950355	0	6.23688e+16	Beta,1
FOXP2	1	1.77305e+16	0	0	1	1.77305e+16	0	3.38714e+16	Beta,1
P2RY14	4	7.0922e+16	4	7.0922e+16	0	0	0	1.98883e+16	Beta,1
CDA	5	8865248226950355	5	8865248226950355	0	0	0	1.45106e+16	Beta,1
RARRES2	3	5319148936170213	3	5319148936170213	0	0	0	2.72645e+16	Beta,1
HEPACAM2	10	1773049645390071	10	1773049645390071	0	0	0	2.07698e+16	Beta,1
ZNF283	4	7.0922e+16	0	0	4	7.0922e+16	0	3288183478596189	Beta,1
CNTN1	3	5319148936170213	3	5319148936170213	0	0	0	1.84967e+16	Beta,1
ZFP1	1	1.77305e+16	0	0	1	1.77305e+16	0	1.74717e+16	Beta,1
PTPRN2	3	5319148936170213	3	5319148936170213	0	0	0	738184683043863	Beta,1
CREB3L4	8	1.41844e+16	0	0	8	1.41844e+16	0	4760246229904581	Beta,1
NFIL3	1	1.77305e+16	0	0	1	1.77305e+16	0	4133286490803509	Beta,1
ETV6	8	1.41844e+16	0	0	8	1.41844e+16	0	395317306327364	Beta,1
TFEB	5	8865248226950355	0	0	5	8865248226950355	0	4.39606e+16	Beta,1
LGI4	1	1.77305e+16	1	1.77305e+16	0	0	0	4.41072e+16	Beta,1
MYCN	2	3.5461e+16	0	0	2	3.5461e+16	0	998336401342423	Beta,1
PTPRT	1	1.77305e+16	1	1.77305e+16	0	0	0	3.19974e+16	Beta,1
MEIS3	19	3368794326241135	0	0	19	3368794326241135	0	1.15295e+16	Beta,1
STMN3	12	2127659574468085	12	2127659574468085	0	0	0	7042060890651067	Beta,1
BHLHE41	5	8865248226950355	0	0	5	8865248226950355	0	2.16005e+16	Beta,1
ZNF143	1	1.77305e+16	0	0	1	1.77305e+16	0	1.70276e+16	Beta,1
TCF7	4	7.0922e+16	0	0	4	7.0922e+16	0	2.51421e+16	Beta,1
GHSR	6	1.06383e+16	6	1.06383e+16	0	0	0	2.56264e+16	Beta,1
KDM2B	3	5319148936170213	0	0	3	5319148936170213	0	1.47393e+16	Beta,1
NFKB1	5	8865248226950355	0	0	5	8865248226950355	0	261873522949461	Beta,1
RNF152	2	3.5461e+16	2	3.5461e+16	0	0	0	6589660331979067	Beta,1
ANXA4	4	7.0922e+16	4	7.0922e+16	0	0	0	1.89429e+16	Beta,1
CALML4	9	1.59574e+16	9	1.59574e+16	0	0	0	4725949226497535	Beta,1
KCNJ11	3	5319148936170213	3	5319148936170213	0	0	0	1.74265e+16	Beta,1
NEGR1	8	1.41844e+16	8	1.41844e+16	0	0	0	4.75949e+16	Beta,1
E2F5	8	1.41844e+16	0	0	8	1.41844e+16	0	4959686122060474	Beta,1
HES1	2	3.5461e+16	0	0	2	3.5461e+16	0	1.23793e+16	Beta,1
PLAG1	2	3.5461e+16	0	0	2	3.5461e+16	0	3979104017608564	Beta,1
USF2	4	7.0922e+16	0	0	4	7.0922e+16	0	1.12298e+16	Beta,1
RFX3	9	1.59574e+16	3	5319148936170213	6	1.06383e+16	4170	354161789948909	Beta,1
PPARD	1	1.77305e+16	0	0	1	1.77305e+16	0	1.52559e+16	Beta,1
MYOD1	1	1.77305e+16	0	0	1	1.77305e+16	0	1.28118e+16	Beta,1
HNF1A	1	1.77305e+16	0	0	1	1.77305e+16	0	8457849810204206	Beta,1
MAF	4	7.0922e+16	0	0	4	7.0922e+16	0	247878393930236	Beta,1
ABCC8	8	1.41844e+16	8	1.41844e+16	0	0	0	4333730701008179	Beta,1
ZNF662	1	1.77305e+16	0	0	1	1.77305e+16	0	8135635315139299	Beta,1
SREBF2	4	7.0922e+16	0	0	4	7.0922e+16	0	1.37187e+16	Beta,1
ZNF304	5	8865248226950355	0	0	5	8865248226950355	0	2.61739e+16	Beta,1
ZNF281	3	5319148936170213	0	0	3	5319148936170213	0	1.84952e+16	Beta,1
SPI1	1	1.77305e+16	0	0	1	1.77305e+16	0	1.19303e+16	Beta,1
YBX1	2	3.5461e+16	2	3.5461e+16	0	0	0	2.43168e+16	Beta,1
CXCR4	2	3.5461e+16	2	3.5461e+16	0	0	0	6.58728e+16	Beta,1
ZNF609	1	1.77305e+16	1	1.77305e+16	0	0	0	1964608806576105	Beta,1
TEAD1	1	1.77305e+16	0	0	1	1.77305e+16	0	43671419626631	Beta,1
RABEPK	1	1.77305e+16	1	1.77305e+16	0	0	0	1336132569113527	Beta,1
SMC2	3	5319148936170213	3	5319148936170213	0	0	0	2.92717e+16	Beta,1
SLC7A2	8	1.41844e+16	8	1.41844e+16	0	0	0	4170152996745084	Beta,1
NWD2	1	1.77305e+16	1	1.77305e+16	0	0	0	1.09272e+16	Beta,1
SP1	8	1.41844e+16	0	0	8	1.41844e+16	0	3259630729963783	Beta,1
MEOX1	2	3.5461e+16	0	0	2	3.5461e+16	0	4763219894752164	Beta,1
TP73	1	1.77305e+16	0	0	1	1.77305e+16	0	15028778484502	Beta,1
NKX1-1	4	7.0922e+16	0	0	4	7.0922e+16	0	2.5525e+16	Beta,1
GPX1	1	1.77305e+16	1	1.77305e+16	0	0	0	2.55253e+16	Beta,1
H2AC21	2	3.5461e+16	2	3.5461e+16	0	0	0	7590508178502559	Beta,1
SERPINF2	5	8865248226950355	5	8865248226950355	0	0	0	1.44697e+16	Beta,1
TUBB2B	5	8865248226950355	5	8865248226950355	0	0	0	1.6828e+16	Beta,1
PFKP	1	1.77305e+16	1	1.77305e+16	0	0	0	1080759162081246	Beta,1
SCIN	8	1.41844e+16	8	1.41844e+16	0	0	0	3202341936922094	Beta,1
RXRA	2	3.5461e+16	0	0	2	3.5461e+16	0	1.38296e+16	Beta,1
FAM155A	3	5319148936170213	3	5319148936170213	0	0	0	9084836389867128	Beta,1
RGS2	1	1.77305e+16	1	1.77305e+16	0	0	0	1.07182e+16	Beta,1
RFX5	3	5319148936170213	0	0	3	5319148936170213	0	1345508743155967	Beta,1
ZFP14	2	3.5461e+16	0	0	2	3.5461e+16	0	1.2159e+16	Beta,1
TUBA4A	9	1.59574e+16	9	1.59574e+16	0	0	0	3836736246051477	Beta,1
ZNF200	1	1.77305e+16	0	0	1	1.77305e+16	0	3962545005981436	Beta,1
MYBL2	2	3.5461e+16	0	0	2	3.5461e+16	0	1192581554111663	Beta,1
ASB13	1	1.77305e+16	1	1.77305e+16	0	0	0	2.46541e+16	Beta,1
PRDM5	1	1.77305e+16	0	0	1	1.77305e+16	0	7528826688759436	Beta,1
HEY1	2	3.5461e+16	0	0	2	3.5461e+16	0	1102734710644233	Beta,1
HOXD3	4	7.0922e+16	0	0	4	7.0922e+16	0	1554826641796019	Beta,1
TFE3	1	1.77305e+16	0	0	1	1.77305e+16	0	3.92088e+16	Beta,1
GFI1B	1	1.77305e+16	0	0	1	1.77305e+16	0	1.16339e+16	Beta,1
MZF1	3	5319148936170213	0	0	3	5319148936170213	0	1.16805e+16	Beta,1
HOXA5	3	5319148936170213	0	0	3	5319148936170213	0	4.95814e+16	Beta,1
BACH1	2	3.5461e+16	0	0	2	3.5461e+16	0	1769372602702903	Beta,1
FOXA1	1	1.77305e+16	0	0	1	1.77305e+16	0	1.3692e+16	Beta,1
NRF1	6	1.06383e+16	0	0	6	1.06383e+16	0	2.09846e+16	Beta,1
SLC37A4	2	3.5461e+16	2	3.5461e+16	0	0	0	1.12844e+16	Beta,1
FOXJ1	2	3.5461e+16	0	0	2	3.5461e+16	0	1.44047e+16	Beta,1
ZNF543	4	7.0922e+16	0	0	4	7.0922e+16	0	2551122868430277	Beta,1
NOBOX	2	3.5461e+16	0	0	2	3.5461e+16	0	2.93114e+16	Beta,1
ESRRB	4	7.0922e+16	0	0	4	7.0922e+16	0	6.00792e+16	Beta,1
STAT6	1	1.77305e+16	0	0	1	1.77305e+16	0	1.47161e+16	Beta,1
ATOH7	1	1.77305e+16	0	0	1	1.77305e+16	0	3.84021e+16	Beta,1
ZNF2	1	1.77305e+16	0	0	1	1.77305e+16	0	1.35586e+16	Beta,1
TFAP4	1	1.77305e+16	0	0	1	1.77305e+16	0	2800439107996754	Beta,1
HEYL	4	7.0922e+16	0	0	4	7.0922e+16	0	8529177295719186	Beta,1
STAT2	3	5319148936170213	0	0	3	5319148936170213	0	1700891878858246	Beta,1
STAT5B	2	3.5461e+16	0	0	2	3.5461e+16	0	1.00151e+16	Beta,1
SP3	9	1.59574e+16	0	0	9	1.59574e+16	0	4.44125e+16	Beta,1
RXRG	4	7.0922e+16	0	0	4	7.0922e+16	0	4103493716379898	Beta,1
MPP3	5	8865248226950355	5	8865248226950355	0	0	0	3392383816461628	Beta,1
ARNTL	2	3.5461e+16	0	0	2	3.5461e+16	0	2.56009e+16	Beta,1
ZSCAN31	2	3.5461e+16	0	0	2	3.5461e+16	0	167240810390661	Beta,1
ZNF383	6	1.06383e+16	0	0	6	1.06383e+16	0	4943911408343837	Beta,1
TEAD2	1	1.77305e+16	0	0	1	1.77305e+16	0	750504578689876	Beta,1
SCG3	6	1.06383e+16	6	1.06383e+16	0	0	0	2.13335e+16	Beta,1
PTPRD	2	3.5461e+16	2	3.5461e+16	0	0	0	8295718945703854	Beta,1
FOXN2	1	1.77305e+16	0	0	1	1.77305e+16	0	7127490492298653	Beta,1
ZNF664	3	5319148936170213	3	5319148936170213	0	0	0	6332394704264624	Beta,1
ZNF189	2	3.5461e+16	0	0	2	3.5461e+16	0	1.33633e+16	Beta,1
E2F2	1	1.77305e+16	0	0	1	1.77305e+16	0	1.30819e+16	Beta,1
GRIA3	5	8865248226950355	5	8865248226950355	0	0	0	2571309841338792	Beta,1
THRA	3	5319148936170213	0	0	3	5319148936170213	0	1.37471e+16	Beta,1
TFAP2A	1	1.77305e+16	0	0	1	1.77305e+16	0	1.17166e+16	Beta,1
MCM6	1	1.77305e+16	1	1.77305e+16	0	0	0	1.92718e+16	Beta,1
ADRA2A	3	5319148936170213	3	5319148936170213	0	0	0	2724029445017839	Beta,1
ZNF783	3	5319148936170213	0	0	3	5319148936170213	0	2732196563619716	Beta,1
VEZF1	1	1.77305e+16	0	0	1	1.77305e+16	0	8005272637265729	Beta,1
KLF16	2	3.5461e+16	0	0	2	3.5461e+16	0	5721990550388407	Beta,1
ZNF449	1	1.77305e+16	0	0	1	1.77305e+16	0	1394954457420827	Beta,1
CALB1	7	1.24113e+16	7	1.24113e+16	0	0	0	2.37844e+16	Beta,1
MAFG	5	8865248226950355	0	0	5	8865248226950355	0	2.49292e+16	Beta,1
PKLR	2	3.5461e+16	2	3.5461e+16	0	0	0	2.11646e+16	Beta,1
CLU	10	1773049645390071	10	1773049645390071	0	0	0	4423935385596171	Beta,1
GLUD1	2	3.5461e+16	2	3.5461e+16	0	0	0	1.25718e+16	Beta,1
CREB3L1	4	7.0922e+16	0	0	4	7.0922e+16	0	2.81053e+16	Beta,1
HOGA1	2	3.5461e+16	2	3.5461e+16	0	0	0	2.00626e+16	Beta,1
ZFP42	1	1.77305e+16	0	0	1	1.77305e+16	0	3.64579e+16	Beta,1
ENPP2	7	1.24113e+16	7	1.24113e+16	0	0	0	3355479008742967	Beta,1
MTSS1	4	7.0922e+16	4	7.0922e+16	0	0	0	2.24147e+16	Beta,1
ZFP64	3	5319148936170213	0	0	3	5319148936170213	0	1.32146e+16	Beta,1
ZNF484	2	3.5461e+16	0	0	2	3.5461e+16	0	9076160589414728	Beta,1
MAD2L1	1	1.77305e+16	1	1.77305e+16	0	0	0	1.85629e+16	Beta,1
NFYA	1	1.77305e+16	0	0	1	1.77305e+16	0	1.35363e+16	Beta,1
DDAH1	3	5319148936170213	3	5319148936170213	0	0	0	7829092763841264	Beta,1
GRHL2	1	1.77305e+16	0	0	1	1.77305e+16	0	7365538593471261	Beta,1
RORB	1	1.77305e+16	0	0	1	1.77305e+16	0	3507340131501615	Beta,1
KLF9	3	5319148936170213	0	0	3	5319148936170213	0	1.28989e+16	Beta,1
CEBPA	3	5319148936170213	0	0	3	5319148936170213	0	8692140079091401	Beta,1
ZNF282	2	3.5461e+16	0	0	2	3.5461e+16	0	2.12375e+16	Beta,1
USF1	3	5319148936170213	0	0	3	5319148936170213	0	1.45278e+16	Beta,1
GLI2	2	3.5461e+16	0	0	2	3.5461e+16	0	1.11471e+16	Beta,1
PCDH9	1	1.77305e+16	1	1.77305e+16	0	0	0	5138271781860588	Beta,1
ATF4	3	5319148936170213	0	0	3	5319148936170213	0	4311917901331177	Beta,1
RGS4	4	7.0922e+16	4	7.0922e+16	0	0	0	6804093542777871	Beta,1
NRXN1	3	5319148936170213	3	5319148936170213	0	0	0	3297156251634778	Beta,1
IRX1	1	1.77305e+16	0	0	1	1.77305e+16	0	2.36123e+16	Beta,1
MSC	2	3.5461e+16	0	0	2	3.5461e+16	0	896607560687521	Beta,1
ID1	1	1.77305e+16	1	1.77305e+16	0	0	0	3.4217e+16	Beta,1
TBX3	2	3.5461e+16	0	0	2	3.5461e+16	0	1.07824e+16	Beta,1
SRF	1	1.77305e+16	0	0	1	1.77305e+16	0	4660584807789597	Beta,1
IGFBPL1	1	1.77305e+16	1	1.77305e+16	0	0	0	5049295958198703	Beta,1
PREB	2	3.5461e+16	2	3.5461e+16	0	0	0	9088117091647458	Beta,1
ARNT	3	5319148936170213	0	0	3	5319148936170213	0	2.38202e+16	Beta,1
MAP1B	2	3.5461e+16	2	3.5461e+16	0	0	0	947351223897855	Beta,1
PBX1	2	3.5461e+16	0	0	2	3.5461e+16	0	5904630533000251	Beta,1
CHST9	2	3.5461e+16	2	3.5461e+16	0	0	0	1.26981e+16	Beta,1
ETS2	1	1.77305e+16	0	0	1	1.77305e+16	0	3.43914e+16	Beta,1
CFAP61	3	5319148936170213	3	5319148936170213	0	0	0	5114926187553666	Beta,1
NOVA1	2	3.5461e+16	2	3.5461e+16	0	0	0	1.72838e+16	Beta,1
DNAJC12	1	1.77305e+16	1	1.77305e+16	0	0	0	1.40313e+16	Beta,1
E2F6	1	1.77305e+16	0	0	1	1.77305e+16	0	1.2822e+16	Beta,1
HLF	3	5319148936170213	0	0	3	5319148936170213	0	3.1532e+16	Beta,1
POGK	2	3.5461e+16	0	0	2	3.5461e+16	0	1.76463e+16	Beta,1
ZBTB33	1	1.77305e+16	0	0	1	1.77305e+16	0	521567537596187	Beta,1
TIMP1	1	1.77305e+16	1	1.77305e+16	0	0	0	1.00571e+16	Beta,1
ZNF311	1	1.77305e+16	0	0	1	1.77305e+16	0	986141149942047	Beta,1
REV3L	1	1.77305e+16	1	1.77305e+16	0	0	0	3420133922095922	Beta,1
ZNF263	1	1.77305e+16	0	0	1	1.77305e+16	0	1.17076e+16	Beta,1
MYPOP	1	1.77305e+16	0	0	1	1.77305e+16	0	1.05255e+16	Beta,1
ZNF768	2	3.5461e+16	0	0	2	3.5461e+16	0	1992227881449713	Beta,1
TEAD3	1	1.77305e+16	0	0	1	1.77305e+16	0	1.16305e+16	Beta,1
NAGS	1	1.77305e+16	1	1.77305e+16	0	0	0	3.2318e+16	Beta,1
EHF	1	1.77305e+16	0	0	1	1.77305e+16	0	1.04659e+16	Beta,1
ZBTB17	3	5319148936170213	0	0	3	5319148936170213	0	7022244394215133	Beta,1
CXXC4	1	1.77305e+16	1	1.77305e+16	0	0	0	1.37172e+16	Beta,1
EBF1	1	1.77305e+16	0	0	1	1.77305e+16	0	625409137340263	Beta,1
OPCML	2	3.5461e+16	2	3.5461e+16	0	0	0	8655109128899285	Beta,1
KIAA0408	1	1.77305e+16	1	1.77305e+16	0	0	0	9173032209802	Beta,1
CUX2	1	1.77305e+16	0	0	1	1.77305e+16	0	1.87533e+16	Beta,1
ELF5	1	1.77305e+16	0	0	1	1.77305e+16	0	1.03873e+16	Beta,1
CALY	1	1.77305e+16	1	1.77305e+16	0	0	0	5445480638182626	Beta,1
CTSZ	2	3.5461e+16	2	3.5461e+16	0	0	0	3785683020569732	Beta,1
ESRRG	1	1.77305e+16	0	0	1	1.77305e+16	0	6.4094e+16	Beta,1
FOXB1	1	1.77305e+16	0	0	1	1.77305e+16	0	6402293784601623	Beta,1
SYT7	1	1.77305e+16	1	1.77305e+16	0	0	0	6431283849009544	Beta,1
C4BPB	1	1.77305e+16	1	1.77305e+16	0	0	0	3.38775e+16	Beta,1
VCAN	2	3.5461e+16	2	3.5461e+16	0	0	0	839651551870993	Beta,1
RBFOX1	1	1.77305e+16	1	1.77305e+16	0	0	0	1.02006e+16	Beta,1
NFIB	2	3.5461e+16	0	0	2	3.5461e+16	0	1.08707e+16	Beta,1
RELB	1	1.77305e+16	0	0	1	1.77305e+16	0	1.13751e+16	Beta,1
HEY2	5	8865248226950355	0	0	5	8865248226950355	0	1.19682e+16	Beta,1
KLF2	1	1.77305e+16	0	0	1	1.77305e+16	0	4385700839727398	Beta,1
ZNF793	2	3.5461e+16	0	0	2	3.5461e+16	0	6559313801840158	Beta,1
HOXC5	1	1.77305e+16	0	0	1	1.77305e+16	0	3.19981e+16	Beta,1
SNAP25	2	3.5461e+16	2	3.5461e+16	0	0	0	1.1059e+16	Beta,1
FOXI2	2	3.5461e+16	0	0	2	3.5461e+16	0	1.86872e+16	Beta,1
PLAGL2	1	1.77305e+16	0	0	1	1.77305e+16	0	1.02112e+16	Beta,1
NKX1-2	1	1.77305e+16	0	0	1	1.77305e+16	0	6.27882e+16	Beta,1
NFATC1	1	1.77305e+16	0	0	1	1.77305e+16	0	4336780361550583	Beta,1
ONECUT2	2	3.5461e+16	0	0	2	3.5461e+16	0	8490662804661116	Beta,1
CDH17	3	5319148936170213	3	5319148936170213	0	0	0	7657184904689849	Beta,1
TBX5	1	1.77305e+16	0	0	1	1.77305e+16	0	4681169507178862	Beta,1
MEOX2	2	3.5461e+16	0	0	2	3.5461e+16	0	2246611419261057	Beta,1
ELK3	3	5319148936170213	0	0	3	5319148936170213	0	9521767220339236	Beta,1
SOX11	2	3.5461e+16	0	0	2	3.5461e+16	0	6514275792036446	Beta,1
PBX2	2	3.5461e+16	0	0	2	3.5461e+16	0	3.3619e+16	Beta,1
HES6	1	1.77305e+16	0	0	1	1.77305e+16	0	5316836807091807	Beta,1
ZNF260	1	1.77305e+16	0	0	1	1.77305e+16	0	2971661731636861	Beta,1
RAB3C	1	1.77305e+16	1	1.77305e+16	0	0	0	1.90617e+16	Beta,1
NFE2L1	1	1.77305e+16	0	0	1	1.77305e+16	0	2.37104e+16	Beta,1
DMBX1	1	1.77305e+16	0	0	1	1.77305e+16	0	2075292651368422	Beta,1
ZNF394	1	1.77305e+16	0	0	1	1.77305e+16	0	8236797108286735	Beta,1
UNC80	2	3.5461e+16	2	3.5461e+16	0	0	0	1.14381e+16	Beta,1
RBPJ	1	1.77305e+16	0	0	1	1.77305e+16	0	7438137512923052	Beta,1
CACNA1D	1	1.77305e+16	1	1.77305e+16	0	0	0	6.18637e+16	Beta,1
ROS1	1	1.77305e+16	1	1.77305e+16	0	0	0	1.25572e+16	Beta,1
MEST	1	1.77305e+16	1	1.77305e+16	0	0	0	9349643659681660	Beta,1
EFNA5	1	1.77305e+16	1	1.77305e+16	0	0	0	6.11892e+16	Beta,1
ENO2	1	1.77305e+16	1	1.77305e+16	0	0	0	3.21782e+16	Beta,1
E2F8	5	8865248226950355	0	0	5	8865248226950355	0	5702527080072302	Beta,1
OVOL2	1	1.77305e+16	0	0	1	1.77305e+16	0	3.20942e+16	Beta,1
GINS1	1	1.77305e+16	1	1.77305e+16	0	0	0	1599630517655577	Beta,1
RUNX1T1	2	3.5461e+16	2	3.5461e+16	0	0	0	1.22396e+16	Beta,1
QPCT	2	3.5461e+16	2	3.5461e+16	0	0	0	7642418753004502	Beta,1
NR5A2	1	1.77305e+16	0	0	1	1.77305e+16	0	6053300992032605	Beta,1
GSDMD	2	3.5461e+16	2	3.5461e+16	0	0	0	1.8649e+16	Beta,1
ZBTB14	1	1.77305e+16	0	0	1	1.77305e+16	0	470652578411645	Beta,1
H1-3	1	1.77305e+16	1	1.77305e+16	0	0	0	2142526201049837	Beta,1
SPINK1	1	1.77305e+16	1	1.77305e+16	0	0	0	1.86647e+16	Beta,1
NKX2-2	1	1.77305e+16	0	0	1	1.77305e+16	0	1.61053e+16	Beta,1
ZNF524	1	1.77305e+16	0	0	1	1.77305e+16	0	7854769699468166	Beta,1
HOXB5	1	1.77305e+16	0	0	1	1.77305e+16	0	2988320544761383	Beta,1
XPA	2	3.5461e+16	0	0	2	3.5461e+16	0	7008980164574261	Beta,1
GPR160	4	7.0922e+16	4	7.0922e+16	0	0	0	1.77589e+16	Beta,1
TCFL5	1	1.77305e+16	0	0	1	1.77305e+16	0	196338729010218	Beta,1
DPP10	2	3.5461e+16	2	3.5461e+16	0	0	0	4679300023849683	Beta,1
ZNF740	1	1.77305e+16	0	0	1	1.77305e+16	0	4377437410305809	Beta,1
ZNF32	1	1.77305e+16	0	0	1	1.77305e+16	0	6204193807171511	Beta,1
MAP2	1	1.77305e+16	1	1.77305e+16	0	0	0	9175304189835420	Beta,1
GALP	1	1.77305e+16	1	1.77305e+16	0	0	0	7437255695344201	Beta,1
RUNX2	1	1.77305e+16	0	0	1	1.77305e+16	0	1.95073e+16	Beta,1
TAGLN3	3	5319148936170213	3	5319148936170213	0	0	0	2.54499e+16	Beta,1
HOXD9	1	1.77305e+16	0	0	1	1.77305e+16	0	1.12549e+16	Beta,1
GMEB1	1	1.77305e+16	0	0	1	1.77305e+16	0	6153664887318261	Beta,1
FOXK1	1	1.77305e+16	0	0	1	1.77305e+16	0	5860902474580029	Beta,1
TK1	2	3.5461e+16	2	3.5461e+16	0	0	0	1.93429e+16	Beta,1
PEX5L	1	1.77305e+16	1	1.77305e+16	0	0	0	1.76973e+16	Beta,1
TSHZ1	1	1.77305e+16	1	1.77305e+16	0	0	0	1.00282e+16	Beta,1
NFKB2	1	1.77305e+16	0	0	1	1.77305e+16	0	3978333717865955	Beta,1
MECOM	1	1.77305e+16	0	0	1	1.77305e+16	0	4309022706949862	Beta,1
ZNF300	1	1.77305e+16	0	0	1	1.77305e+16	0	4293736590043192	Beta,1
ZNF821	1	1.77305e+16	0	0	1	1.77305e+16	0	5.81303e+16	Beta,1
MEF2A	1	1.77305e+16	0	0	1	1.77305e+16	0	1.56251e+16	Beta,1
FBXL19	1	1.77305e+16	0	0	1	1.77305e+16	0	2857207653456309	Beta,1
ZNF180	1	1.77305e+16	0	0	1	1.77305e+16	0	1.105e+16	Beta,1
PKNOX2	2	3.5461e+16	0	0	2	3.5461e+16	0	3.03798e+16	Beta,1
TFCP2	1	1.77305e+16	0	0	1	1.77305e+16	0	5494377444852493	Beta,1
ELL2	1	1.77305e+16	1	1.77305e+16	0	0	0	4260191736590193	Beta,1
NFATC3	1	1.77305e+16	0	0	1	1.77305e+16	0	1.01227e+16	Beta,1
MSMO1	1	1.77305e+16	1	1.77305e+16	0	0	0	5557777960381759	Beta,1
HES2	1	1.77305e+16	0	0	1	1.77305e+16	0	4946285294727193	Beta,1
PFKFB2	1	1.77305e+16	1	1.77305e+16	0	0	0	2.80432e+16	Beta,1
DCDC2	1	1.77305e+16	1	1.77305e+16	0	0	0	1.18932e+16	Beta,1
ALX3	1	1.77305e+16	0	0	1	1.77305e+16	0	2.07749e+16	Beta,1
GJD2	1	1.77305e+16	1	1.77305e+16	0	0	0	1708880025206868	Beta,1
TBX20	1	1.77305e+16	0	0	1	1.77305e+16	0	8972154881450102	Beta,1
ID2	1	1.77305e+16	1	1.77305e+16	0	0	0	2.70557e+16	Beta,1
A1CF	1	1.77305e+16	1	1.77305e+16	0	0	0	1942661604053833	Beta,1
VIM	1	1.77305e+16	1	1.77305e+16	0	0	0	5822746397012781	Beta,1
DCLK1	1	1.77305e+16	1	1.77305e+16	0	0	0	2744334767001063	Beta,1
ZNF274	1	1.77305e+16	0	0	1	1.77305e+16	0	5831433395037052	Beta,1
GBE1	1	1.77305e+16	1	1.77305e+16	0	0	0	7343405128983656	Beta,1
AMIGO2	1	1.77305e+16	1	1.77305e+16	0	0	0	7335246006331601	Beta,1
PBX3	1	1.77305e+16	0	0	1	1.77305e+16	0	5774261784752667	Beta,1
MLX	1	1.77305e+16	0	0	1	1.77305e+16	0	3.37381e+16	Beta,1
NEUROD4	1	1.77305e+16	0	0	1	1.77305e+16	0	2753837081752312	Beta,1
BATF3	1	1.77305e+16	0	0	1	1.77305e+16	0	8732716091908394	Beta,1
SERPINI1	1	1.77305e+16	1	1.77305e+16	0	0	0	690432279397709	Beta,1
ZNF667	1	1.77305e+16	0	0	1	1.77305e+16	0	2.99434e+16	Beta,1
IKZF2	1	1.77305e+16	0	0	1	1.77305e+16	0	2.90748e+16	Beta,1
TBX2	1	1.77305e+16	0	0	1	1.77305e+16	0	9683945956600042	Beta,1
GLIS2	1	1.77305e+16	0	0	1	1.77305e+16	0	965927052850406	Beta,1
MAST4	1	1.77305e+16	1	1.77305e+16	0	0	0	5403571470201334	Beta,1
EPS8L3	1	1.77305e+16	1	1.77305e+16	0	0	0	2.46694e+16	Beta,1
TBX4	1	1.77305e+16	0	0	1	1.77305e+16	0	961027311629207	Beta,1
LHFPL6	1	1.77305e+16	1	1.77305e+16	0	0	0	7199570306975467	Beta,1
SNCB	1	1.77305e+16	1	1.77305e+16	0	0	0	7188160708995197	Beta,1
PRTFDC1	1	1.77305e+16	1	1.77305e+16	0	0	0	1419178694364948	Beta,1
B3GAT2	1	1.77305e+16	1	1.77305e+16	0	0	0	2786570479671309	Beta,1
PBX4	1	1.77305e+16	0	0	1	1.77305e+16	0	2.21503e+16	Beta,1
