# Supplementary material for: A multimodal cross-species comparison of pancreas development
Source: Research Square preprint supplement (doi:10.21203/rs.3.rs-4151759/v1), 2024-04-03
Supplement: Supplementary file 9 [file bf33355a64554cd999d991e2.xlsx]

## Sheet: Sheet content
Supplementary Table 5: Comparison of NEUROG3 targets derived from pig multiome atlas and human stem cell models
Sheet1: Summary of the overlapping NEUROG3 TF targets of pig multiome atlas and human stem cell models
Sheet2: NEUROG3 TF targets derived from pig multiome atlas
Sheet3: The 138 TFs genes bound by NEUROG3 from Schreiber et al. 2021
Sheet4: NEUROG3 TF targets identified in hESC-derived EPs

## Sheet: Sheet1
Sheet1: Summary of the overlapping NEUROG3 TF targets of pig multiome atlas and human stem cell models
Pig	hES	Gradwohl
PRDM16	PRDM8	NA
ARID5B	ARID5B	ARID4B, A
CREB5	CREB5	NA
GRHL2	GRHL3	NA
CCDC88A	CCDC169	NA
FOS	FOS	NA
PAX6	PAX6	NA
ETS1	ETS1	ETS2
NPAS3	NPAS3	NA
FOXP2	FOXP2	FOXP1
NEUROD1	NEUROD1	NEUROD1
NKX2-2	NKX2-2	NKX2-2
ARX	ARX	NA
ISL1	ISL1	NA
EHF	EHF	EHF
ETV6	ETV5	ETV5
MLXIPL	MLXIPL	MLXIPL
DACH1	DACH1	DACH1
ST18	ST18	ST18
ETV1	ETV1	NA
ZEB1	ZEB1	ZEB2
MAFF	MAFF	MAFF
IRX2	IRX2	IRX2
NKX6-1	NKX6-1	NKX6-1
ATF6	ATF5	ATF6
FOXA2	NA	FOXA2
FOXN3	NA	FOXN2
GATA4	NA	GATA4
GLI2	NA	GLI2
GLIS3	NA	GLIS3
HBP1	NA	HBP1
KLF3	NA	KLF3
PBX1	NA	PBX1
RFX3	NA	RFX3
SMAD3	NA	SMAD2
SOX5	NA	SOX5
TFDP2	NA	TFDP1
TOX3	NA	TOX3
XBP1	NA	XBP1
YBX1	NA	YBX1
NFIB, NFIA	NA	NFIC
NA	SOX9	SOX9
NA	LMX1B	LMX1A,B
NA	PAX4	PAX4
NA	INSM1	INSM1
NA	IRX1	IRX1
NA	TFCP2L1	TFCP2L1

## Sheet: Sheet2
Sheet2: NEUROG3 TF targets derived from pig multiome atlas								blue - activating; black - inhibiting
Primary targets	Secondary targets
GLIS3	ZNF521	ZENF423	REL	PBX3	NR6A1	NFIB	HNF1B	HES1	GLI3	GATA6	ATF3
ID1	ZBTB10	NR4A1	ID4	ID3	ID2	HMGB2
ZEB1	ZNF385D	JUNB	IRX2
ARID5B
HNF4G
NPAS3
NR3C1
TFDP2
THRB
ARX
ETS1
ISL1
ARNT2	ELF1	FOXN3	FOXP2	HIVEP1	MECOM	MLXIP	NR5A2	RBPJ	SMAD3	ZNF704	PLAGL1
FOXA2	KLF5
NEUROD1	HBP1	FOS
NFAT5	HMBOX1
NKX2-2	AHR	KLF3	PBX1	REST	ATF4
ONECUT1	TCF7L2
PROX1	YBX3	MAFF
DACH1	TOX3	TCF4	SMARCA1	PAX6	JAZF1	ETS2
ZBTB38	CREB5
ST18	ATF6
SOX6	HIVEP2	ETV1	EHF	BCL11A	BACH2
SIM1	STAT1	RFX2	POU6F2	PDX1	NKX6-1	ZFHX3	ZBTB44	ZBTB16	XBP1	STAT3	NFIA	MITF	MEIS1	GATA4	FOXP1	FOXSB	ETV6	EGR1
RORA	FOXO1
RFX3	GRHL2	KLF6	PRDM16	TEAD1	ZBTB20	CCDC88A	MEIS2	MLXIPL	SOX5	TOX	ZNF536

## Sheet: Sheet3
Sheet3: The 138 TFs genes bound by NEUROG3 from Schreiber et al. 2021
AKAP8L
ANKZF1
ARID4A
ARID4B
ATF6
BARX2
CAMTA1
CENPX
CIC
CXXC1
DACH1
DMRT1
DPF1
E2F3
E2F7
E4F1
EEA1
EHF
ELK3
ERF
ERG
ETS2
ETV5
FBXL19
FOXA1
FOXA2
FOXN2
FOXP1
GATA4
GATAD2A
GATAD2B
GLI2
GLIS3
GTF3A
HBP1
INSM1
IRX1
IRX2
IRX3
IRX4
IRX5
ISX
JARID2
KAT6B
KAT7
KLF1
KLF13
KLF3
KLF4
LMX1A
LMX1B
MAFF
MLXIPL
MSANTD4
MXD1
MYCL
NAIF1
NEUROD1
NEUROG3
NFATC2
NFE2L1
NFE2L3
NFIC
NFKBIL1
NFYA
NKX2-2
NKX6-1
NPAS3
NR2C1
NR2E3
NRL
PAX1
PAX4
PBX1
PHTF2
RFX1
RFX3
RFXAP
SETBP1
SIX5
SMAD2
SMAD9
SOX1
SOX11
SOX2
SOX4
SOX5
SOX9
SP1
SP2
SRCAP
ST18
T
TERF1
TFCP2L1
TFDP1
TFEC
TIGD2
TOX
TOX2
TOX3
TOX4
TSHZ2
USF1
XBP1
YBX1
ZBTB18
ZBTB20
ZBTB43
ZBTB5
ZBTB7C
ZBTB8B
ZEB2
ZFP64
ZKSCAN1
ZNF12
ZNF138
ZNF140
ZNF143
ZNF157
ZNF195
ZNF236
ZNF280B
ZNF287
ZNF322
ZNF331
ZNF414
ZNF444
ZNF484
ZNF532
ZNF564
ZNF596
ZNF608
ZNF682
ZNF687
ZNF703
ZNF831
ZNF90

## Sheet: Sheet4
Sheet4: NEUROG3 TF targets identified in hESC-derived EPs
Early	Early	Constitutive	Late			Italic - NEUROG3 direct targets from ChIP-seq
RCOR2	GRHL3	HLX	EHF			Orange - downregulated
ATOH7	MIXL1	PAX6	ETV5
ATOH8	OSR1	DCC	HOXB2
HES6	BHLHE40	RASD1	FOXC1
SMYD1	LHX4	MYT1	TESC
TRIB1	TBX2	MAFB	ESRRG
LZTS1	SNAI1	ETS1	ELL2
IRF8	INO80C	LMX1B	MLXIPL
PIK3R1	ZNF326	NPAS3	DACH1
DAB2	ATF5	FOXP2	HOXB3
PRDM8	PARP12	PAX4	ST18
SOX9	NKX3-1	NEUROD1	LHX8
DSCAM	FUS	NKX2-2	PTF1A
SNAI2	MSX1	INSM1	LMO1
NLRP3	CCDC169	ARX	ETV1
SAMD11	AHRR	ISL1	ESRRB
DPF3	MSX2	RUNX1T1	EBF3
GBX2	CEBPD	NR0B1	HDAC9
ARID5B	TXNIP		LMO2
HAND1	RUNX2		ZEB1
CREB5	FOS		MAFF
	ZIC1		BEX1
	DMRTC1		MAK
	ANKRD1		CEBPE
			FEV
			ASCL1
			IRX1
			IRX2
			NKX6-1
			HOXA7
			TFCP2L1
			HMOX1
