# Supplementary material for: A multimodal cross-species comparison of pancreas development
Source: Research Square preprint supplement (doi:10.21203/rs.3.rs-4151759/v1), 2024-04-03
Supplement: Supplementary file 10 [file ce94a09dd682433e7c75b0be.xlsx]

## Sheet: Sheet content
Supplementary Table 4: CellRank computed lineage drivers for beta and alpha lineage in human, pig and mouse
Shee1: Beta lineage drivers in human, pig and mouse
Shee2: Alpha lineage drivers in human, pig and mouse

## Sheet: Sheet1
Shee1: Beta lineage drivers in human, pig and mouse
index	gene_name	human_corr	human_pval	human_qval	human_ci_high	human_ci_low	pig_corr	pig_pval	pig_qval	pig_ci_high	pig_ci_low	mouse_corr	mouse_pval	mouse_qval	mouse_ci_high	mouse_ci_low	human_corr_winsmaxabs	human_ci_high_winsmaxabs	human_ci_low_winsmaxabs	mouse_corr_winsmaxabs	mouse_ci_high_winsmaxabs	mouse_ci_low_winsmaxabs	pig_corr_winsmaxabs	pig_ci_high_winsmaxabs	pig_ci_low_winsmaxabs
ENSG00000133028	SCO1	-655573500502141	73870798702752	341040812789105	-176165476262336	-1131974067420789	-18773846628725	9475032172094874	9752516781775508	539552000511397	-57698267130884	-129423372665607	2345222001059983	3403018453156283	83960248709549	-342689179804331	-2566968281431533	-689794797230702	-4432365744262898	-508821682139913	330085625968476	-134726580931949	-65550637251809	1883896154232768	-2014588833898157
ENSG00000165490	DDIAS	-271034026927546	2686359289161451	5421047641917855	209200443760149	-750020684038541	-316143035461428	2673757876785797	5168119019813142	242554353311431	-872871775750721	-327959148743324	25841479397494	63295858784906	-114678956894428	-540941070041754	-1061262771876482	819146751939144	-2936786347937852	-1289355410076537	-450854730109963	-2126683453910277	-1103842906946422	846901156816615	-3047713250838694
ENSG00000142507	PSMB6	968101269298169	7.41097e+09	6091983346829	1441366260054596	490417675585804	-216311058719414	4480017815515434	6589364344285996	342371686160666	-773646102495727	-800833788658202	169.024	1083.78	-5884788636693	-1012464265703238	3790704245364614	564382402377727	1920282953654908	-3148439011185116	-2313575972785393	-3980453917799763	-755270245042701	1195422688202307	-270125755413279
ENSG00000196387	ZNF140	-244967998155831	3174181874591434	5994068832360869	235270952574977	-724078989248119	476303600013739	945783138941368	2786486433984467	1031829205028052	-82184229957241						-959198443424183	921228622480258	-2835208862510842				1663058462321745	3602727947139437	-286953907331045
ENSG00000138326	RPS24	-464820676891439	576906594941439	1808564386499821	15175509066247	-942679921721337	-337703353247107	2360878369179809	480016265871951	220982561318885	-894286657293405						-1820055162723836	59421331700861	-3691164235204059				-1179122768242421	771581232256705	-3122485307921931
ENSG00000163545	NUAK2	-800320297506653	10654088567065	65038862094357	-32159328324555	-1275383578200967	755228271745842	79604897233487	432273324768011	130798284202875	197792910272151	124317813241179	2535000159043915	3626267536603025	337588706251972	-8906624787541	-3133739873731698	-1259232957068035	-4993901049070613	488749424084061	1327213546121816	-35015961284634	2636949979541033	456694413803468	690612401850118
ENSG00000148331	ASB6	141773067664849	5629026891494988	7892248580211404	621312620885698	-338419542330541	445121112885112	1182568160599381	3232852565813981	1000903191406462	-113430055349686	72414476210621	5059725059357277	6200058488731014	285730766446291	-140967740584061	55512763645596	2432816136474499	-1325117977333859	284693984076343	1123336583091251	-554207801992365	1554181898940729	3494746884939237	-396051622170141
ENSG00000117115	PADI2	-165820009976154	4986084896468892	7553303117060598	314392536679593	-645268787534958	-38790656198452	8917858862210062	9478459816176064	51959116199211	-596930684522456	80383794896942	4603184539703757	5785554741930056	29369386101759	-13299945220588	-649286015541224	12310376623783	-2526619073729035	316024972103982	1154643101314016	-522880864570966	-13544119559035	1814201024039378	-2084239183340095
ENSG00000121989	ACVR2A	-90741399610585	7111775215740506	8440309848537129	389390519455631	-570455282279569	354491791184226	2135835094624475	4544958552620883	910958285021517	-204181585457192	-154127900183549	1568512246175405	2454186787306335	59252021459955	-367367528857825	-355307672495396	1524700299458624	-2233678778146316	-60594632809261	232946434701097	-1444287535915027	1237741165793235	3180695851728685	-712919057372354
ENSG00000205414	nan	51099254839605	8348313084793031	91686700105654	530931370053129	-428968282650169											200084607260028	2078918665106902	-1679671271733389
ENSG00000176055	MBLAC2	642016537126268	87077704324734	390219000840992	1118532180028983	162555110603819	1141002929139822	5.84073e+09	6157433375467	1688516596990065	586469364748422	1433700022206647	3.97229e-25	6.62611e-24	1642037550430255	1224083995529339	2513884538797428	4379732593974011	636501952237215	5636521765415828	6455590604222083	4812426572246935	3983918191643198	5895613250275759	2047712509225603
ENSG00000110786	PTPN5	-29142472736505	9053431084476284	9519077762643076	450882923502563	-509033602675796	-31677958589032	266413076268266	5157365246460923	241917538643581	-873504106019766	-599015124892884	3.62087e+07	1.56695e+09	-386148209232926	-811338621147942	-114110474416357	1765480395994773	-1993175610744996	-2354998770297408	-1518122865526479	-3189738248161715	-1106065482164062	844677658983997	-3049921090974455
ENSG00000236266	nan	-203592682653831	406051157214861	6824423836064153	276639971065098	-682887716445575											-797188962494119	1083213446785628	-2673920020489415
ENSG00000068366	ACSL4	137099899204335	5758456903545042	7892248580211404	616656452013334	-343088192329268	863902067129828	23863405324433	159170655368372	1415345295740604	307113949558751	347769260203018	139603623655	3585538843442	560713646286155	134508629139461	536829344650789	2414584408378119	-1343398576617781	1367237897827371	2204418373791479	528814120135055	3016394676244452	4941810162931353	1072317011032463
ENSG00000204920	ZNF155	7011667922576	9771750757975708	9882488187858174	486957610101504	-472966578935198	-18841455789824	5086933705101659	7080424084143508	370244184821386	-745899273258387						27454937003093	1906734696528787	-1851951314953847				-657867009462536	1292742117999657	-2604376910853118
ENSG00000184110	EIF3C	206708666100066	3989026285065227	6789045230761075	68599040867805	-273525034518418	217598857705169	4453028789074995	6571467488609735	774926783685105	-34108478530602	-479772460811179	1.03378e+10	3.5336e+11	-266685014754097	-692424101343717	809389929534161	2686068944357915	-1071016578992962	-1886202047794587	-1048459138514994	-2722231608893575	759766715363243	2705729172003135	-1190929353790335
ENSG00000253172	nan	-234387452054519	3387795883894308	6227869085072428	245851453759274	-713547061904104											-917769181531369	962657708495687	-2793969972571391
ENSG00000187189	TSPYL4	732070018747135	2766825438061	148194776074411	1207788589846507	25299663303643						1033604228485519	1.61205e-06	0.000154682	124422078202637	822056675386561	2866498594698378	4729225629828181	990635423512467	4063564651214561	4891593366986433	3231875756052592
ENSG00000173846	PLK3	-263234886892366	2826601701133264	5595782777581313	217001609021813	-742259425272236	28434254238741	9205641976590964	9627623121325262	586610433306497	-529919162414776	-2027568332123701	1.53182e-64	5.43365e-63	-1822090310269126	-2231276204079066	-1030724403444239	849693050362675	-2906396307672608	-7971286083467651	-7163459254592172	-8772153654283283	99280851814225	2048205063258929	-1850262201198824
ENSG00000126226	PCID2	-205919998578523	4007047592231421	6793121477236788	274313445880973	-685205113977737	399394818140712	1610713939172996	3905862903558993	955533563686904	-159229513127617	-498277057030616	4.64191e+09	1.64558e+11	-2852198449564	-710881736835655	-80630181735323	107410368815593	-2682994038819885	-1958951966003108	-1121327920153688	-2794796903290582	139452427421755	3336334596413133	-55596470245158
ENSG00000145365	TIFA	-416555623050588	889965456654934	2521334654035428	63533730517857	-89472911206442	-120188463586503	6733626080428711	8221350425278922	438374972627065	-678002837873508	-360706042383179	9182688583252	24250589598317	-147459090750328	-573625015021431	-1631068173139676	248773129047221	-3503407702391207	-1418098226489911	-579728228812744	-2255178790733987	-419649235141656	1530627120761789	-2367310171435134
ENSG00000170881	RNF139	-4108988065077	8668462158143265	9340237617567116	438959019009523	-520949471047684	-5.83586e+10	9983669596089112	9992544988972366	557687528712778	-558851062373705	98870101192255	363810212384209	4827754959260105	312164686888605	-114514492340291	-16089183018768	1718791070387487	-2039833470058896	388702984367176	1227260253043526	-450208145730613	-2037643786493	1947218043135374	-1951280629479347
ENSG00000164930	FZD6	-1111933717787703	5.21322e+09	5.75485e+10	-635362229005132	-1583445416505611	-1041060876284986	2479011205108	22313594666298	-485613929730199	-1590088700253039	-278709772036925	104507136890485	22662884522102	-65388218821807	-491777769982161	-4353895608088195	-2487828882385531	-6200150183670783	-1095733885741532	-257070595579418	-1933400335717214	-3634961188720592	-1695566347253788	-5551943064721165
ENSG00000111405	ENDOU	-191046748222418	4355969891160061	7091580886379486	289180746705249	-670394358431377						-413985856474465	1420683381501	4207976514791	-200802785229449	-626792658518845	-748064012016882	113231819746295	-2625000938606986	-1627565218978774	-789446363933146	-2464204789999717
ENSG00000174669	SLC29A2	-578911248540059	180370098376059	714480560736655	-99224619753376	-1055939591281926	403872645247853	1564224126141348	384161472389799	959977484352437	-15474555652962	-11965436628858	9124888127170714	9370488824931442	201400141754706	-225320121054124	-2266789020038197	-388524629883494	-413464460636726	-47041530966469	791794841999808	-885835074866619	1410159025378637	3351850960069608	-54030854960124
ENSG00000237945	LINC00649	-290303238200694	2360576927700064	4995474128435727	189923721232898	-769193814873464											-1136713433180649	743666679514758	-3011860795991787
ENSG00000062194	GPBP1	-118490608233037	1.18721e+09	1.49091e+11	-708975770507584	-1655453676963009	218964472103576	4424510302305396	6552864690837392	776284830100674	-339720103068662	-49297390264916	5.85594e+09	2.05779e+11	-279907876171287	-70559218956802	-463962671994462	-2776070591325719	-648210624268418	-1938102873003562	-1100444173755738	-2774001305995876	76453488545785	2710470917779511	-1186164438423008
ENSG00000173276	ZBTB21	-338795311641661	1666760191875271	3971810511985057	14139694243528	-817428429492787						-149066014371887	1709247409004498	2636557411811426	64314877576884	-362311218786927	-132658934233266	553654877820338	-3200728597542701	-586045770716899	252850806784677	-1424408899292393
ENSG00000232973	CYP1B1-AS1	43930959680769	8577344571990344	9297036113710408	5237828489303	-436123327761266											172016379531822	2050927864735334	-170768761748002
ENSG00000234741	GAS5	11830692249868	9614975039678144	980066761915441	49176509835909	-468158221056733											46324343082091	1925558931890841	-1833123674498068
ENSG00000103832	GOLGA8UP	-13184102928683	5905765412901685	7892248580211404	348341726866613	-611416462669915											-516237676036866	1363969353979038	-2394066668674954
ENSG00000281706	LINC01012	-456207701786639	624873511500342	1921733659457785	23806756025245	-934124648935904											-1786330135879636	93217903947878	-3657665147973749
ENSG00000104904	OAZ1	1593673669556771	542427	1.27258e+07	2057895091464506	1122295817670729	1162136602988373	4.23502e+10	4598335143058	1709316110737799	60781069126679	916077287392019	0.0323878	0.252374	1127234491896883	704093033229592	6240200004379937	8057908720009008	4394469520408292	3601513210023486	4431667468711555	2768107445913273	4057708385823479	596823669328427	2122227742078178
ENSG00000145247	OCIAD2	249776411324883	308008369959817	5893892726632234	72886495413704	-230462204238844	-462408748674116	1046134491329197	2985874869367255	96108651910866	-1018049964308753	5543829536849292	0	0	5689888049368341	539427440596917	97802630037618	2853948820816806	-902399453145645	10	10	10	-1614543292370487	335572325840263	-3554616442456421
ENSG00000073910	FRY	116937599018433	6332348468942012	7984224121306543	596565102962558	-36322859530535	-55614953993696	8453528693025381	923273289252805	502810456645384	-613693711064543	-138600696559959	2029836072166511	3029234959434098	74781854596216	-351857082454337	457881698020367	2335914578519212	-1422260482377016	-544901883770356	294001216824267	-1383308971786934	-194184801181815	1755609625549432	-2142768854634072
ENSG00000277959	nan	187218852383315	4448524733127833	7159160248739643	666582204909288	-29300676756891											733075475726024	2610074043045077	-1147299392086574
ENSG00000186960	LINC01551	71603137012252	7701510053318978	8808678811382413	551375976627396	-408499581197413											280369754757722	2158971712648165	-1599523878113801
ENSG00000013810	TACC3	147601646212111	5469587710109163	7892248580211404	627119704298489	-332596305694756	1019619976123	9714741527180652	9861509450719484	568433140704938	-548104297008735	-391638193454146	3195076623349	9014698698525	-178426850364532	-604493514829916	577950060250079	245555439376654	-1302316470366478	-1539706470935837	-701476466511011	-2376536793343533	35600982852003	1984737350056154	-1913757295449782
ENSG00000263677	nan	-5186677715773	9831148834597036	9914721225543888	474787471631638	-48513693060988											-20308992313141	1859081215402953	-1899605630905982
ENSG00000149506	ZP1	26642627140411	9134293932572566	95610261428483	506540183471235	-453377678278039											104322061143498	1983412360696729	-1775248875614056
ENSG00000150551	LYPD1	-868770331595998	3795266994266	26384333523405	-390436030227806	-1343132109125313	229555337149449	4206909195490562	6384383376756972	786816300412122	-329135759933001	-364440131278061	8116766514062	21580776711457	-151197261154977	-577351636093915	-3401763316161372	-1528794108906402	-525917768069647	-1432778614997965	-594424663577533	-2269829819862231	801513878976561	2747242529040982	-1149208216762348
ENSG00000186854	TRABD2A	-65981385145194	7877472581296383	8905418454851725	414112088211035	-545770877202883											-258357182990006	1621500250667366	-2137024345303429
ENSG00000137720	C11orf1	-6924554047371	9774585797861434	9882488187858174	473053497945332	-486870702718378	408162654302241	1520644201770953	3774760055357755	964234801213431	-150449464324208	940739475705717	0.00044717	0.0366895	1151788082732166	728841945634837	-27113833291072	1852291655650804	-1906394401358626	3698471401458115	4528198714452332	2865406588887288	1425137992283634	3366715779130931	-525308342806836
ENSG00000040341	STAU2	630123862411801	100357672215839	438863591170056	1106739018265869	15061705223289	1411650097850746	6.22402e+08	9.76564e+09	1954516226061059	860159553635725	65086683417651	5499636082224841	6574033792969401	278408457786002	-148294346841469	2467317496734202	433355520553394	589757205604564	255885123833416	1094549283448688	-583011997428557	4928908034707874	68243757750356	3003327341173833
ENSG00000204588	LINC01123	-176773138627433	4706711122117929	7332786272935029	30344664894627	-656178737344198											-692174164328105	1188177866181491	-2569338151133594
ENSG00000078967	UBE2D4	475867206221525	519900874639919	1669963480554802	953651412233953	-4104498325218	90469892896166	14646339812614	104659253368525	1455616408138591	348188210521116						186330903187583	3734124281826352	-16071602961305				3158840725998521	5082420509480593	121573162573431
ENSG00000064655	EYA2	-474128916103336	5285462315163	1691112539112864	5846718866099	-951925007237463	1144862466085275	5.50998e+10	5838385909335	1692315471938496	59036644598643	-1360549546504454	2.92346e-21	4.47124e-19	-1150528950867964	-1569354344604592	-1856502570672167	22893454156136	-3727364358090112	-5348934235207571	-452324849889247	-6169840122760838	3997394125013414	5908877376623131	2061319531996453
ENSG00000083845	RPS5	-5910249006725	8094256546982901	903659714065658	420979258928933	-538911947024163	-1505275473418654	1.03979e+07	1.88225e+08	-955031776739083	-2046348301709863	-4718880380325902	0	0	-4551343892436597	-4883076905996628	-231422132285771	1648389393383655	-2110167469301208	-10	-10	-10	-5255809769487477	-3334582560464146	-7145016035818658
ENSG00000109061	MYH1	231487024220996	3447926752532237	6296053011509285	710659775252727	-248751681403714											906412245588211	2782664492334914	-974013860577042
ENSG00000181852	RNF41	644020659959555	850012025267	382825365708397	1120519401049895	164567015973648	22186478912912	4364289504589827	6503250018244898	779169005500389	-336821696673314	212144927513988	513199402400539	941105309187743	425312853471999	-1216059652223	2521731896479214	4387513770798529	644379783274677	834037443561401	167209675564928	-4780879257607	774661612974937	2720541285303876	-1176044382049527
ENSG00000171450	CDK5R2	3197051510513	1.20376e-25	2.19707e-23	3621444074282019	2759431674273872	4413005742973868	5.13015e-47	1.86029e-43	4851745231725068	3952102239077143	843811948542661	7.93007	547.42	1055272513950401	631588599198362	10	10	10	3317405552214685	4148752459508008	2483059797049333	10	10	10
ENSG00000105325	FZR1	300681753210271	2197158109866143	4767297422142567	779519113011952	-179539681063949	128504991142617	6521991237306937	8093408434818715	686281947228099	-43007284223514	128807325672379	236757195520399	3430377180829928	3420737523761	-84576354666005	1177351620687525	3052290607138092	-703006857654377	506399723409311	1344846286378478	-332507816510136	448687167101289	2396217454252737	-150163945784429
ENSG00000100652	SLC10A1	-284624670644938	2453540984722763	5125983594554948	195604873392428	-763543929941799	-6337354223554	9822677068440518	9918190392420936	551951470983739	-564586676866209						-1114478393496423	765911839491983	-2989738066195337				-22127463596554	1927190062355113	-1971307062657889
ENSG00000130684	ZNF337	-585551803162271	167547397902728	671467865394691	-105887061191094	-1062527974650207						239317115766843	279140325700213	549232997716001	452446529666657	25969939489767	-2292790823151463	-414612133167897	-4160442127345967	940863577431069	1778771481239045	102099551449616
ENSG00000155974	GRIP1	624257058612049	107549764988636	465494230016131	1100920811024554	144728363609337	791113707077204	54299816353165	317014900226954	1343449598994714	233877339417261	991523680806608	6.42455e-05	0.000571736	1202340542973081	779812953388296	2444345397868384	4310773391699471	566699414366344	3898127028825647	4726943248197039	3065796621779497	2762247325393972	4690779629308845	816604553171447
ENSG00000074966	TXK	-9051415369293	7118685274880051	844292773638921	389617439248708	-570228756964787	277550323125555	3302270323778508	5842440523067809	834526539850855	-281154617274318	188380109199056	83552997725319	143632123863153	401579139785156	-24990371883785	-354417866756973	1525588828221321	-2232791794005649	74060721854327	1578788816960585	-9824842914628	969092850821985	2913827281782075	-981677580151397
ENSG00000152359	POC5	-167310352044075	4947561337558265	7515561329312481	312903247547916	-646753321822672	-168907100641994	5535583661130814	7408776655840029	389729694939512	-726491348353065	-285976031790944	86055183003326	1902230141335	-72659929215246	-499031979320031	-655121609588125	1225206191216077	-2532431926790272	-1124300831840659	-285658970601785	-1961919906192532	-589754902253092	1360777594728514	-2536612330134077
ENSG00000130829	DUSP9	1092302069042952	7.64369e+09	8.15942e+10	1564064573894026	61556693398513	-3316675749813	9907191905718352	9957147230213624	554962897372056	-561575575064972	-981607040531024	0.000149719	0.0131255	-769858966441678	-1192470014494118	4277025784031272	6124262417900431	2410318283804284	-3859140240873243	-3026663007210026	-4688137746525775	-11580482852417	19377047385797	-1960793519759378
ENSG00000125356	NDUFA1	983097572651651	5.71036e+10	485335711103	1456188878260677	505520540377121	879727167485245	197931299918	1357064989984	1430968625018932	32304442088531	1912374403459096	9.45843e-56	2.952e-54	2117096556169902	1705974770928133	3849423877896478	5701863573505309	1979419838913944	7518406766940572	8323261933114882	6706956670605904	3071649490741777	4996360474886193	1127939738107471
ENSG00000153012	LGI2	540939138753501	271449515292417	997987062282825	1018257761898603	61135535252974	677626832120032	173043366544143	803981230160861	1231238376260303	11981077675978	76757406234956	480802165837055	5961933356388864	290070338170964	-136625405636205	2118105155717156	3987097366066645	239382738537356	301768001812749	1140397397836203	-537136123770135	2365997312262577	429898367494161	418330506344999
ENSG00000230490	nan	1053578827216526	1.59545e+10	1520413248862	1525825391565247	576531893079051											4125400781729468	5974532802425329	2257472398798961
ENSG00000259342	nan	-112775896322159	6453763178060672	8060934730957067	367385292598501	-592417561407547											-441586105215135	1438536475990025	-2319674435179865
ENSG00000189367	KIAA0408	681930348570925	53214570029726	258475912207987	1158102199832635	202631232434737	-305791597829305	2833666681288967	5360642210504013	252909451603498	-862588335694816	121870962599784	2629643354459532	374102679035012	335144253647329	-9151326982201	2670171344000804	453467324617211	793424301148444	479129750035569	1317603299837944	-359779960372898	-1067699896583281	883056948715519	-3011807660357627
ENSG00000122550	KLHL7	-66232164101909	67991116041821	31833144917233	-182940860752207	-1138664277487737	26695359503451	92540747262552	9654097746725866	584877491482137	-531653171268441	1195673370737997	2.59708e-12	3.17052e-11	1405448376658406	984825315882209	-2593391348642735	-716324541136886	-445856197859027	4700731585481859	5525451797797092	3871792733572612	93209338593398	2042154335182067	-1856316654908065
ENSG00000272342	nan	-155033084233049	5269595716189179	7774973141026673	325171205733255	-634523265156555											-607048652048803	1273242695918559	-2484543829547191
ENSG00000180817	PPA1	1479134053238063	1.20091e+06	2.38818e+08	1945286239299151	1006315847571864	982462831328907	5466686624952	44778220131599	1532327636007223	426532976991693	123633959788051	3.56429e-15	4.56918e-14	1445885990426973	1025684773534595	5791707864547783	7616976694087477	394033752102588	4860608875609347	5684430305586466	4032429700032507	3430360647097757	53502649193451	1489279688049513
ENSG00000237248	LINC00987	-53952608750323	275493694275438	1010268635043437	-59718399670812	-1016855248427714											-2112572202147946	-233833792329019	-3981605674301656
ENSG00000140795	MYLK3	531357228361392	29990493543805	108300680659445	1008746936329982	51526306709264	371800837238126	192043639579897	4333073527113824	92814363341652	-186856308482612	60772429427529	5767162472884468	6793153636294201	274097325521036	-152607795095641	208058615894071	3949856709532819	201756774611364	238923844527981	1077600277053566	-599970109022372	1298177315160624	324070009917807	-652426236230939
ENSG00000229127	KANSL1L-AS1	-17959552030552	4636146914555638	7281847731825027	300625946448694	-658989807066708											-703225502187541	1177133103333257	-2580345195818971
ENSG00000274618	H4C6	-12953036395173	5971033663616753	7892248580211404	35064996400338	-60911400956906											-5071900183453	1373007503799867	-2385051166866459
ENSG00000160339	FCN2	187442248387634	4443092636610546	7156063873368332	666804686037425	-292783484854549	-440556889175153	1220819802523433	3290260712183976	118002635018586	-996375606936215						733950206716288	2610945191739628	-1146425104695278				-1538245485979421	412017210741768	-3478938401302112
ENSG00000234181	PIGO-AS1	-133460367658899	5860221108434978	7892248580211404	346724059668978	-613030015405765											-522578368933729	1357635204744726	-2400384707293311
ENSG00000198668	CALM1	3662591704869634	2.32108e-39	6.17149e-38	4070989857873717	3239578114543339	517562309676816	7.99202e-75	5.36993e-72	5572870353574231	4754736757627268	555216799992194	3.31165e+07	1.32174e+10	76766784742573	342261811042231	10	10	10	2182807790477565	3018048729583805	1345585629859265	10	10	10
ENSG00000258659	TRIM34	-410530399310899	937211217388347	2623095255216743	69569008797662	-888741560639829	416281485352087	1440703884809561	3653333360914021	972291205521935	-142318556387332	-18673035765379	8638245464730065	9009615658263908	194695157796285	-232024228455168	-1607475764025422	272404907790574	-347996280326305	-73412130074429	765434524337096	-912191946386722	1453485648444993	3394845466499989	-496918519067544
ENSG00000255237	nan	-54967862567874	8225274650178913	9100217678032228	425106621141848	-534789101755963											-215232555314916	1664550522346947	-2094024026918907
ENSG00000224610	nan	8356741225829	7331036976216079	8574431568665772	563303805493589	-396553972347813											327217156373822	2205676404559001	-1552749566772931
ENSG00000170439	METTL7B	-193796446092207	4290175140989653	7039273351477537	286432308843095	-673132661729618	-48434807786211	891300648771721	2673717225794567	74121642021728	-1039805775202209						-758830748637355	1121556394537372	-2635723058561712				-1691146507342416	258802629251305	-3630578886179269
ENSG00000198729	PPP1R14C	2841444728169292	9.04325e-18	1.08203e-14	3276719600775932	239413326283396	134911896517531	6360826090112737	7989941828153376	692659502423379	-423676502071074	1561772100199736	2.07907e-32	4.20696e-31	1769237078467144	1352919868153012	10	10	9374485305625756	6140030898406571	6955669349584065	5318938526604012	471057475032487	241848528329314	-1479306039332585
ENSG00000236432	MFF-DT	-30614389265628	9005864064369546	9492917695493682	449413976457712	-510501707343608											-119873921291924	1759728576453033	-1998924131869185
ENSG00000113924	HGD	-68318188597646	7804192776660942	8867177293159544	411779164377739	-548100795427424	610446605517991	320662085188798	1294719925086266	1164746521383633	52355733065621	-249057952865331	221367537943268	44578859527677	-35716495557412	-46217279507581	-267507187280584	1612365437441267	-2146147389746416	-979159203760552	-140417661627624	-1817009819682064	2131431282637787	4066821159426452	182804927200482
ENSG00000136828	RALGPS1	797976985735088	11022555093545	66984415646073	1273063496573035	319237331239789	664553924910947	195893949735534	885126044641671	1218303316402819	106680411856604	19049834753561	861104336022529	8992851372059104	232400825603079	-194318500022138	3124564385420311	4984816520875572	1250007974565339	74893496933032	913672519720136	-76395371265459	2320352036936947	4253819706506338	372484612119196
ENSG00000127080	IPPK	347212884574096	1563801858687337	3809478637094127	825799027825572	-132971040415742	51428261760128	710353288086084	230905248524852	1069481346443713	-44113332831262	80161867443952	4615578285082356	5794896261974402	293472110557028	-13322135463571	135954925103496	3233504572167063	-520662355685082	315152475138267	1153771300185406	-523753263159347	1795665745969832	3734193912133285	-154025817701419
ENSG00000169744	LDB2	-722981090913476	3124279141834	164796459696454	-243864981454063	-1198783597549064	-88392467198597	7565514954499164	8732389484411677	470108813898846	-646342815137292	-136844621237872	2087663683718245	3098259176080215	76538162521127	-35010283765066	-2830909923949252	-954879463347717	-4693965617664227	-537997959224537	300906055836752	-1376412243835034	-308630546936625	1641428788579307	-2256766247922391
ENSG00000170807	LMOD2	122855301365845	6161395629781925	791936930515156	602462383839496	-357317724246738	126032508220941	658462793689758	8127171928166039	683820668891117	-432541125498836						481053095602979	2359006013646162	-1399115833437627				440054262278145	2387623671282529	-1510257699169735
ENSG00000159322	ADPGK	-351802833120919	1509729153334844	3716004202899718	128376262845368	-830363077505931	150517092765179	5975522791776746	7725373909228695	708191303626	-408095123216855	-455491185566949	2.83316e+09	9.1696e+10	-24236628959587	-668202237988929	-1377521686351629	502671011809301	-3251375597697207	-1790741397528636	-952851255737299	-2627004533575505	525544473818752	2472716016431359	-1424902201197827
ENSG00000139168	ZCRB1	-12424544517535	6121531927527368	7901674145829004	35592913646222	-603847681823001	267817512693232	3474756351382055	599261900913345	82485353618531	-290886701946048	557775258031224	2.92277e+08	1.17342e+10	77021907881934	344825188001	-486496352633494	1393678669189666	-2364430296325777	2192866243570633	3028078771472597	1355663421445561	935109835049732	2880053086916469	-1015658061862821
ENSG00000071655	MBD3	112545557339	6460511197444118	8064783866402504	592188001368794	-36761534969378	-749795257116882	84241899321344	453358348644549	-192331033673515	-1302611981395035	-1091759182889023	7.67635e-09	8.05242e-09	-880449649859761	-1302086562415871	44068418824733	231877556825234	-1439437289195634	-4292198020249181	-3461444889391227	-5119089862478	-2617980102021003	-671541750069916	-4548191276988504
ENSG00000023608	SNAPC1	-656038696923736	73451308513463	339588142142309	-176632536671643	-1132435284156435	450846014492573	1135923456874761	3147764601201348	1006581811063738	-10769434259305	182099506078138	943810532925239	1593634581661908	395306355108495	-31273081136021	-2568789807862903	-691623622305671	-4434171687807538	715915333460847	1554127669710724	-122948594381336	1574170927081547	3514574315332514	-376024845893213
ENSG00000055044	NOP58	9572247702738	6960915470281093	834635544390624	575420440501785	-38441646607449	-557216530314549	504345023289728	1808469950879586	1056052258503	-111202657018387	-470646840312599	1.51856e+10	5.09213e+10	-257545023631752	-683321103658502	374811614809224	2253120387148136	-1505223860508977	-1850325115544838	-101252570885827	-268644361713204	-1945573508280101	3687304998548	-3882744530626195
ENSG00000125352	RNF113A	475911139832477	519683911529931	1669764643088189	953695045087497	-4060464999092	229222430900809	4213652184517813	6389506279934226	786485280071698	-329468480253454	-67104583568897	5376639297924363	648050854242862	146276796294731	-280424870578152	1863481058636698	3734295130939366	-15899185754989	-263818399934945	575080095780112	-1102476712070418	800351505746662	2746086740635589	-1150369940806634
ENSG00000267049	nan	143886955332591	5570943890363919	7892248580211404	623418750300097	-336307629728054											563404790107605	2441062911853936	-1316848557261835
ENSG00000179526	SHARPIN	910481454147633	1949413509315	14492412409432	1384394026492066	432408736548718	286953637790552	3140973840086131	5689383463800337	843871075657958	-271750997696529	232913557617131	323835136633555	627226057355989	44605233070754	19562842544362	356508768557371	5420743139078139	1693142737594254	915688300645201	1753632999654878	76910362060945	1001925401378073	2946454600471296	-948843964963846
ENSG00000115526	CHST10	-218334274195567	3729067665383163	6558834651642073	261902509217265	-697565609599827	688907756098125	155236642774113	739291453861707	1242398836698028	131142828797597	498605896312549	4.57517e+08	1.62322e+11	711209728427224	285549234766273	-854911243636464	1025507335902228	-2731392883770719	1960244781613926	2796086386248047	1122622900138272	2405385710931062	4337951463918705	457897423404661
ENSG00000004534	RBM6	-404131369459282	989566612061589	2735502005387042	75978334010258	-882382161836109	-135433198574261	6347786811726471	7980854880538598	423156039514722	-693178396328078	-466123019882071	1.83285e+10	6.07225e+10	-253014211372601	-678808366689364	-1582419677029146	29750130737584	-3455061895881011	-1832539935992244	-994713041272194	-2668702011667744	-472877649805143	147748879575383	-2420297049778281
ENSG00000124198	ARFGEF2	-326204308460836	1830147104977499	4229625303133426	153999131421341	-804906430371442	34843484457376	9027395820915688	9538892577651198	59299743175338	-523527649828833	64017840629834	3.9103e+06	1.83516e+07	852374595278493	427401752248033	-1277287920338292	60300009903359	-3151697368336539	2516830205035537	3351069180552921	1680309159384019	121659277154201	2070505864293433	-1827945638626586
ENSG00000205100	HSP90AA4P	104754846098435	6690431329648273	8195884618379945	584423337452976	-375396226984084											410178823663489	2288372194759339	-1469904147893588
ENSG00000229638	RPL4P4	32388498379862	8948578782873832	9465006126561424	512271194436147	-447643418890641											126820635612361	2005852748168457	-1752795768596037
ENSG00000136930	PSMB7	-292967946877715	2317821654576978	4940511181178185	187257692805923	-771844958003698	165383395468495	5618641216665161	7467873397716804	722985171745289	-393248982747042	-837423933909085	126.211	86.3148	-625180526826669	-1048910249806134	-1147147385510828	733227559562231	-3022241630970067	-3292291384004987	-2457866772819748	-4123739528092068	577451556850401	2524370187354161	-1373065516485749
ENSG00000273269	nan	-111907572151032	6479216814183155	8075866226463488	368252551461099	-591552171026437											-438186088888093	1441932320987382	-231628590642197
ENSG00000175928	LRRN1	-1154806812137337	2.20967e+08	2.62926e+11	-678605747986258	-1625758153674194	-347826068426308	2223263553868629	4640410616622913	210852664011726	-904339314224233	-578109496226609	1.06231e+06	4.4269e+08	-365199517370909	-790494891548941	-4521769802572926	-2657153514203333	-636583023957467	-2272809310039329	-1435764104413041	-310779214106995	-121446717281958	736211750609632	-315758509758791
ENSG00000172497	ACOT12	201885370523971	410000176636299	6861802887688432	681187647530544	-278346670027599	393180614632322	1676947564843727	3999777314559923	949366047279166	-165451850719711						790503798922839	2667263218501857	-1089896209434417				1372826802833921	3314800137397705	-577690574747435
ENSG00000230606	nan	-27897556313816	2548538297124865	5251925108140677	201256244408528	-757923051081523											-1092358707790413	788040388211263	-2967728912779213
ENSG00000205560	CPT1B	10706759520801	6621840773815605	8163399241308911	586728414731233	-373086457940807	75186940941944	82443911575838	445045170120517	1304662443565515	194416165293858						419234640597274	2297397971815614	-1460859999728686				2625222198320115	455535065698099	678822181681531
ENSG00000143882	ATP6V1C2	490099344367357	453466068104803	1503201278863037	967785160792127	10160915869841	51738759397521	856009303096274	9291866629898174	609831912005713	-5066768874083	-53011729411487	6263255823143963	7223546427895366	160366845787241	-266342041250348	1919036493662066	3789466488640343	3978615476098	-208413030635437	630474438676253	-1047110754899942	180650706069813	2129285022883927	-1769109629326568
ENSG00000167346	MMP26	-133115565285875	5869905115641201	7892248580211404	347068508310711	-612686447056683											-521228258298939	1358983930306747	-2399039428611482
ENSG00000088986	DYNLL1	2317011446847025	6.01465e-07	0.000376562	2766211343128586	185770828600706	4103035991605229	8.87713e-38	2.56707e-34	4556924422853653	3627866570286973	2029769427638912	1.02733e-64	3.65145e-63	2233457374874753	1824309573826925	9072506572053968	10	7274055834593773	7979939583214517	8780728820966379	7172184181113045	10	10	10
ENSG00000106638	TBL2	-267612613328072	2747283671741472	5502999296716525	212622817808495	-746615960063808	441365785941633	1213971127046123	3278540063526265	997178027076527	-117192274394621	353181446495809	11735161410168	30476569584038	566115287354326	139926451262872	-1047865860346682	832547424209408	-2923454786421905	138851564447262	222565466240006	550114023773723	1541069824516019	3481740126094124	-409187761010172
ENSG00000266283	nan	201501621884637	410890917251411	6868491650740978	680805523100655	-278730276992948											789001190009485	2665766969354609	-1091398263608103
ENSG00000005189	REXO5	-31387669222211	8980888622497127	947738378652814	448642248219676	-51127297640645	-681409361325024	166882942729108	780917826023448	-12361028969724	-1234980669719083	-113990844108206	2950880309853352	4097413981572038	99393766322222	-327271684652831	-122901781813582	1756706791851602	-2001944118520946	-448149448226357	390761748304631	-1286652678508575	-2379204365921545	-431596860290595	-4312050241738367
ENSG00000213740	SERBP1P1	12626372131614	6063859728756416	789372724830496	605858889683551	-353913086431375											494399129107238	2372305396190923	-1385784609287924
ENSG00000151276	MAGI1	-1416580031863044	590564	1.06168e+09	-94302940650477	-188373475403301	-691154829485697	151888527320306	727288494368561	-13340025763628	-1244621747426426	-30291667717339	53846945895772	123710014208456	-89614158456342	-515943657282789	-5546770891618474	-3692532680318494	-7375965258707367	-1190902153553259	-352313696592654	-2028407343906367	-2413231577333399	-465779446830797	-4345712964141968
ENSG00000160447	PKN3	-229030913938444	3499374503033192	6351961961384395	251207558954055	-708214730260131	-608723673785181	325557838316641	1309768495063664	-50626420992749	-1163040590176076	-183746069954923	914389969399252	1552099433980762	29625981393877	-396950885504219	-896795082621465	98363011225588	-2773090656696561	-722388719096541	116473102017099	-1560593060814729	-2125415505729593	-176766872739626	-4060864741438462
ENSG00000204071	TCEAL6	838015003415783	6091451361945	40009633419402	1312697458955444	359498633179896	1068074245924185	1697615430182	15874754196687	1616703575500084	512863012457827	414072575241244	1416111388658	419513796422	626879184871046	200889617863241	3281337533448742	5140007547091804	1407655416034878	1627906149584095	2464544964136502	78978774220108	3729280889375803	5644871385023509	1790709062151135
ENSG00000109099	PMP22	-508556632945245	378082818283398	1302009858869452	-28664269052884	-986111981611678	31013625566391	2765779663664421	5278549408221695	866904598385779	-248563403331614	154460120473163	1559592224717571	2442826445259433	367699379383946	-58919733662055	-199130798466098	-112238016656886	-3861227119152761	607252435970352	1445592190085616	-231640061417819	1082869674803567	3026878294284397	-867882315653734
ENSG00000261514	LINC01976	1053578789493087	1.59545e+10	1520413248862	152582535430648	576531855058967											4125400634019301	5974532656534635	2257472249927248
ENSG00000235225	RPL31P17	-174561002524408	4762429557753135	7374250153521409	305657415468786	-653975414170176											-683512308401461	119683435936891	-2560710803174708
ENSG00000205981	DNAJC19	52342300189331	8308733289161838	9149753747615828	532170936378995	-427727484871973	559438705409402	49521034794263	1786087843187462	1114228074106048	1173071678364						204951884510685	2083772319866881	-1674812795089869				1953332439970202	3890431286988118	4095889221826
ENSG00000106367	AP1S1	886323354850273	2877278930217	20601049308542	1360498101074553	408097077313644	3200962785003196	2.73347e-16	3.37547e-14	3693234018412609	2690777664109825	1583213552268283	1.0832e-33	2.28611e-31	1790525680366859	1374496096475326	3470494059399837	5327176082820945	1597947831031366	6224326922257136	7039364450445074	5403764416727893	10	10	9395101284968464
ENSG00000065320	NTN1	1568905827752344	1.08116e+06	2.42862e+07	203355516807977	1097205628416719	53609082159595	8508640139725863	9268101081964304	611695309562546	-504811296741744	-12614306988876	2465962114330433	3546464279870316	87240846797888	-33941215743978	6143218866089905	7962603142139808	4296226196142095	-495925331639483	342983137471645	-1334382355600129	187181112509425	2135791249323264	-1762595745439999
ENSG00000266456	nan	178468980817023	4664241449291383	7299136380382035	657867791813326	-301751824872475											698814416119333	2575951824878096	-1181541600931742
ENSG00000103274	NUBP1	-530417278903213	302829505706028	1090824396118204	-50583725168095	-1007813913029718	405789080410706	1544640608179785	3809902255869919	961879340385067	-152826429386561	-21334693928405	500144993491615	920318886461394	1.35036e+09	-426513228069179	-2076905686128057	-198065995595753	-3946203356833572	-838763094254921	5.30887e+09	-1676815969877402	1416850437568219	3358491467865669	-533607738111586
ENSG00000272374	nan	575111835824546	188086231175788	738660313791569	1052169840136707	95412875969285											2251912012469527	4119883741855111	373599338694617
ENSG00000254035	nan	-202469394894881	4086467670319626	6848883270726261	277762858554939	-681769197329801											-792790608921353	1087610233061812	-266954033904993
ENSG00000161180	CCDC116	-9.69223e+08	996844488665828	9986388218410682	478995335219214	-480929315666069	392225749624432	1687303382921436	4015683428639816	948418318293469	-166407927248182	168176733232921	1223921631069683	1987839450671541	381400314912574	-45199922258334	-3795096355762	1875557556123901	-1883130263776335	661178630551252	1499456750396364	-177701291524065	1369492802562454	3311491053213572	-581028805156055
ENSG00000126353	CCR7	-369828694061285	1311065163794783	3357480431943904	110329474936221	-848285285032929	-40294110981835	8876189869124027	9458593104404538	518091731010498	-598428792072963	-104354551799913	3378069862840262	4553498979555378	109030160647155	-317644264619795	-1448103876211306	432006880161181	-3321551921511087	-410264834644497	42864676295994	-1248802945844495	-140690648250694	180896562085837	-2089469965637913
ENSG00000168386	FILIP1L	-132862023812565	4.93605e+07	7.67011e+08	-854104426761169	-1797122539306792	-440895245726181	1217951384210107	3285793501686336	117663667037588	-996711255233823	-3031209822289	53536031731125	123139843819053	-89818634818309	-516147605533738	-5202354894949597	-3344337394429235	-7036825852040619	-1191705368922116	-353117585444498	-2029209156515481	-1539426889448664	410833672407734	-3480110348651838
ENSG00000175318	GRAMD2A	396583307577014	1054291849185607	2860453962699725	874880346100473	-83538032873012	1954580689942393	3802.54	1.14603e+06	2485726181065378	1411715786543063	-233034446997913	322937709757544	625720592614568	-19683797110001	-446173045018439	1552864432005936	3425687732599896	-327102118242966	-916163571354158	-7738588904099	-1754107582085122	6824600856692264	8679144899001919	4929137392906371
ENSG00000071189	SNX13	172900128148523	4804499169296862	7401320009606512	652321125826221	-30731723068153	60082164907271	8331066771271652	9162488946163148	618144124270708	-498354290667026	44487912691523	4.33589e+09	1373628758526	657615357753521	231738655594256	677008976831357	2554233259918274	-1203333543672253	1749020606121923	258538272988544	911069230601544	209782484912491	2158307887601968	-1740050506240646
ENSG00000267745	nan	-127158369716716	603837303239041	7892248580211404	353019412304564	-606750392445937											-497902220775148	1382285332493327	-2375796170775467
ENSG00000129646	QRICH2	-44397047662192	698646658529898	2091004825893705	36068711814035	-921968192798166	-135562721791528	6344548811618202	7978269257522862	423026724410334	-693307320745469	-156856935219876	1496375063820537	2358446243967682	5652241791108	-370093512523491	-1738413969612224	141230905623556	-361006524148533	-616675396337419	222215131376912	-1455004607844792	-473329892203766	1477037280000743	-2420747201411265
ENSG00000160813	PPP1R35	150689940328417	538602282795386	7858196737025761	630196477548437	-329510709864093	593553838750192	371489267173192	1448484777021945	1148019027225011	35401849902587	1004607614009612	2.07673e-05	0.00189003	1215362998922826	792946807365428	590042606752061	2467601829081915	-1290234489291034	3949565874563037	4778140399109356	3117431728607464	2072448611239953	4008415552764794	123608862206045
ENSG00000162771	FAM71A	-239107726468776	3291383031664401	6127281212979186	241131332303333	-718245778151329						-100495993804032	3559740285317905	4746589080626569	112888648369276	-313789148282584	-936251921745501	94417556720623	-28123682994727	-395095101931912	443816219394662	-123364674384524
ENSG00000156395	SORCS3	-129553597497145	5970375768622018	7892248580211404	350626755128262	-609137160795163											-507280991781687	137291662696267	-2385141817972761
ENSG00000242477	nan	-251311888390002	3050427559808661	5858356316984585	228926573332004	-730393216284264											-984038625340515	896386525797567	-2859932894997095
ENSG00000260840	LINC01964	176160519481837	472210545584097	7345080543293873	655568563492442	-304058893510516											689775388425573	256694895004109	-1190575175370612
ENSG00000236735	RPL31P63	-203250382941603	4068410743875615	6828673178517073	276982150087126	-682546871159373											-795848651295818	1084553285408519	-267258540425205
ENSG00000240563	L1TD1	-416712398211387	88876219832278	2520882923742294	63376689071043	-894884902385433	-2052340121329279	284.517	9672.3	-1511387676322113	-2581036968885883	-204432923281682	603906016466191	1085691001513869	8931409148296	-41761120678939	-163168204307917	248158216436304	-3504017716085	-803718074769408	35113399791067	-1641818107059142	-7165937033103768	-5277151096241529	-9011931407923688
ENSG00000168734	PKIG	6997181327782	42386539154301	212742692557958	1175731904147019	220496314009651	1654841434332612	4.69548e+06	1.01484e+09	2192852129541641	1106797251927297	-1396676879912	8979260922214805	9266190220290018	199399609958367	-227320431487596	273982131890377	4603704242317283	863376942176284	-54909670858206	783929848739142	-893699197849961	5778033277699606	7656547820653242	3864485877996829
ENSG00000101216	GMEB2	-24015000819786	3270335899774686	6108557954190593	240089055489047	-719283270968144	-76469296964865	788550439546053	891627142715778	482005770957945	-634467737203536	-129863173123501	2329357880805802	3382777619568768	83520405166242	-343128536960743	-940333087529086	940094420667063	-2816430713757196	-510550736206289	328356402513898	-1348993120567694	-266999685539947	1682968124230859	-2215303305278469
ENSG00000112343	TRIM38	-1123421623750021	4.15473e+09	4.65559e+10	-64694763584997	-1594784872699886	-605040115208086	336239518807278	1342196716259352	-46929333475799	-1159393268324116						-4398877734734179	-2533192784183575	-6244551039344617				-2112554017252666	-163858146706838	-4048129776868515
ENSG00000165985	C1QL3	945193544323399	1095724900293	8615782102089	141871974861813	467351388051227	-390903098596162	170172700224542	4037260591419124	167732239564021	-947105535218984						3701006593819897	5555149181829024	1829964433418373				-1364874643083501	585652765175567	-3306907348616017
ENSG00000129675	ARHGEF6	-170614752354822	4862716411273842	7445494337381255	30960110576464	-650044769383359	354675520325808	2133460864549557	4543079235440058	911140718563562	-203997701647221	625312772567925	8.8792e+06	4.0509e+08	837555767474332	412502684563315	-66806034304874	121227630126176	-2545319942370229	2458386690506452	3292809681241799	1621734200893008	1238382673234443	3181332835463221	-712277009892034
ENSG00000065911	MTHFD2	743618560134517	23665412055406	129164211717508	1219229352046758	264600613323226	438545431189778	1237980901266454	3320622751096104	994380222831678	-120017701326094	-45388920040312	3.0229e+10	9.75869e+10	-240761922322123	-666604084425889	2911718145847871	477402316002266	1036072051612514	-1784443270930369	-946543763989982	-2620721470729006	1531222292738626	3471971331516083	-419053002775975
ENSG00000002746	HECW1	125429487888806	608766851880834	789372724830496	605027582577724	-35474640445788						-65821146811391	5454708425087014	6544695541594684	147560012705865	-279142381829002	491132598740107	2369050324149188	-138904755530503	-258772630871565	580124998562469	-1097434670055688
ENSG00000129347	KRI1	-47460156380285	526183730948423	1686371876999434	5373005353906	-952394426172187	326075120536175	2526256176863179	4997603252549301	882737502676717	-23261762874981	-73671410608269	498617128987595	6132473427254659	139710986690131	-286986737150401	-1858353273380582	21038578143982	-3729202418224051	-289635560403543	549266935306736	-1128274370704272	1138521708726591	3082160356950763	-812206155835124
ENSG00000198911	SREBF2	851125322815022	4988192584848	3355964820242	1325672174635841	372685443070446	810127200550056	44068768532458	266672674848035	1362235527043696	253002153784342	182738170118146	932310162005301	1577364142498194	395944231779428	-3063421062064	3332672393737491	5190811436490416	1459289783037787	718426210008616	1556635450755347	-120436906085701	2828634711962987	4756372449966773	883380627029778
ENSG00000109814	UGDH	1819779498964587	5.95175	1950.1	2279829216701358	1351622586824515	-2049551694227983	3069.33	103726	-1508543174712878	-2578319810388585	45410198626209	2.99702e+10	9.67867e+10	666816361975852	240975023955836	7125541605118934	8926915566097035	5292423055824291	1785279828164714	2621556029571263	947381562677339	-7156200979697401	-5267219253458503	-9002444195498105
ENSG00000170075	GPR37L1	-133817296507028	5850204326448089	7892248580211404	346367495790948	-613385665633051	-226727343420976	4264391136435438	6429635582305461	331962134806689	-784004288100525						-523975962081063	1356239040676919	-2401777293863738				-79163967499953	1159076768356845	-2737424125672165
ENSG00000073111	MCM2	-401171756340267	1014557511211501	2784925454876637	78942575422625	-879440746597016	-1175646429346329	3.4383e+10	3796426323185	-621455916785232	-1722609768495953	-1897185994209165	1.23817e-54	3.7646e-53	-1690669122883165	-2102037709537035	-1570830994759346	30910811222415	-3443544469359823	-7458694276187092	-664678326124341	-8264058811476106	-4104879205125386	-216987132018273	-6014652739749737
ENSG00000228817	BACH1-IT2	-148561024102811	5443559797074986	7892248580211404	331637775827243	-62807551299397											-581706607171892	1298563243970313	-2459296965122059
ENSG00000124232	RBPJL	261225087020069	2863530610483928	5637796760032212	740259293173542	-219011836021788	-1458112950508892	2.59778e+08	4.38952e+09	-90722867312521	-2000101031680409	-13662294896188	2095047357297394	3105825072730653	76759863223162	-349881395509868	1022854816707954	2898564576139701	-857564309563147	-537126465474753	301777661342138	-1375541654850573	-5091137420113546	-3167673563790592	-6983539377276619
ENSG00000233954	UQCRHL	-82006336949589	7379045635367762	860482461686694	398112689957271	-561747563316194	60872908625168	8309430872668176	9152352745099296	618931871500212	-497565478858208	-812620116297915	74.1965	484.54	-600300486444689	-1024204776726034	-321104598744064	1558852892578691	-2199582771572709	-3194776383889703	-2360052106595769	-402661116470783	21254344038614	2161058380556796	-1737296296207809
ENSG00000146678	IGFBP1	932361925692486	1358910346715	10455722590272	1406032280830228	454433177870417	2370218828276553	0.0237488	11.1177	2890243829749107	1836247127423096	8797613203174	4190552448600779	538238090123286	301280016623814	-125407844542739	365076301625041	5505470042330124	1779381797357572	345873875534142	1184467702365846	-493034829023074	8275840198994827	10	6411428181703624
ENSG00000165973	NELL1	54665332854443	8234881122791184	9105354250424948	534487427722758	-425408612822746	737879527726162	95265782490714	502968985671453	1290831432436105	180353168989897	211423323126604	521172482653138	954240454609006	424592228973246	-1937987824608	214047967807988	2092842789919584	-1665733003129846	831200491080052	1669263655552328	-7619104683908	2576375221021991	4507058391080485	629719917898039
ENSG00000213820	RPL13P2	-240999738840688	3253241755676106	6089966770273472	239239321127799	-72012908973014											-943660298903904	936767194732373	-2819742607743485
ENSG00000108021	TASOR2	-145912753471283	5515556340258626	7892248580211404	334283684109048	-625437073411262	68766575843509	157114890142125	745748943548069	1241170170328523	129895131888758	349646299949768	13147960380078	33891539488411	562587042886399	136387609306584	-571337019770064	1308923581338691	-2448965872245216	1374617388113507	2211783541224677	53620123908932	2401049160202421	4333661460645338	45354097322751
ENSG00000163320	CGGBP1	-214501341513799	3813593585842465	6629004443768296	265734568978452	-69374943862243	83520964765973	33243870443818	210317424616183	1387011699250475	278237694414305	-275099783474378	114921690245037	246729661907946	-61775606182609	-488173684665968	-839902985048488	1040512176476142	-271645025743211	-1081541391641978	-242867785050396	-1919231049943004	2916212416436096	4842880767038566	971492871813806
ENSG00000100075	SLC25A1	900023542066602	2309960915136	1691588855127	1374050285361692	421883654150023	1089290296608661	1253054485634	12134815482965	1637601058238891	534269987545779	328275772473803	25594642283849	62743457666418	541257106983984	11499588007261	3524138610326702	5380241112421066	1651930649771593	1290600200842143	212792593774648	45210069813962	3803358709965123	571783689590563	1865453513109941
ENSG00000259712	nan	-26073986012159	9152700654468298	957040899137174	453945153036079	-505972995805346											-102095485879821	1777470883830199	-1981191476620663
ENSG00000136110	CNMD	143231860584248	5588912625985138	7892248580211404	622766064404764	-336962116988392	-83444202408019	769784398490376	8810924687365419	475046392239328	-64141470106552	-31537844998191	7720696174174981	8303567605284691	181834827274175	-244881803814056	560839696431548	2438507250299931	-131941127225352	-123989500602094	714874761642284	-962740877291601	-291353218708281	1658668804070011	-2239559277808978
ENSG00000262319	nan	-106674518115776	6633478742025818	8170208686755617	373479032156951	-58633664515876											-417695505127111	1462397166133639	-2295863956079166
ENSG00000100813	ACIN1	-1291369779924063	1.16473e+08	1.70529e+10	-81646799083452	-1760420865571377	-413408965330947	1468611524404439	3697017110194976	145195433778514	-969440855971317	-1632090435731363	1.09721e-36	2.44417e-34	-1423687614234592	-1839046878543411	-505649673472954	-3196967897071825	-689311651619636	-6416484007559624	-559715847143202	-7230123176378029	-1443455976762462	506963404914153	-3384893205083964
ENSG00000138138	ATAD1	32169195637271	1891498675208568	4324909580686423	800418440074905	-158515120948158	581845875549064	410603722295525	1558438617019652	1136423765307376	23653410701055	-381458091735607	4560832825617	12576820459653	-168234577866211	-594334810870189	125961932226958	3134124161472993	-620682939883223	-1499683897160344	-661406043907952	-2336598343813981	2031569165278122	3967929613850195	82588090512073
ENSG00000257467	PPFIA2-AS1	-280894692433383	2515983115925536	520825916644447	199336380565472	-759832624608018											-1099873264167433	780522955633501	-2975206052519942
ENSG00000269886	nan	-90470035882014	7120027076756535	84440541383318	389661493687981	-570184778995374											-354245118741409	1525761328098426	-2232619593554474
ENSG00000067560	RHOA	1671204715638642	5826.7	1.56628e+06	2134049507773446	120087478620121	126670412496096	6568444431893068	81173346545641	68445568886588	-431904311268556	660930844723447	1.20663e+06	5.9291e+06	873060122687751	448202447362254	6543781122234652	835609949649135	4702153890888262	2598417405326246	3432393323445752	1762086078496172	442281564576337	2389840902776774	-1508034202864934
ENSG00000198944	SOWAHA	182808491266678	455.09	15125.4	228797230150265	1360055874735954	1693198585449764	20220.9	4.55569e+07	2230384928807994	1145759705191471	79673018561392	46429441226628	5814789643873688	292983650802462	-133710147657318	7158062342338125	8958800687112318	5325444498210634	31323058958071	1151850944465592	-525674929102294	5911960849849162	7787597091397221	4000526919072166
ENSG00000102078	SLC25A14	1323054006925614	5.62028e+07	8.66456e+08	1791639140162881	848479659288895	1432927746690442	4.18602e+08	6.79671e+09	1975394685368806	881711787040544	829321784960213	22.6408	1529.44	1040840512092071	617053189646588	5180559720302264	7015355015183932	3322313014736194	3260438180273659	4092013747550819	242591454278498	5003200931003737	6897274863833138	3078578975099724
ENSG00000124827	GCM2	-136066134011409	5787276945273452	7892248580211404	344120929673009	-615626419154186											-532781526277019	1347442370337939	-2410551204357152
ENSG00000134058	CDK7	-613627742076462	121753238430823	514661333873334	-134060243953959	-1090378708263929	5866434598925	9835851748350332	9923302234098948	564117256913512	-552420954903963	-380901975719484	4649258435591	12800678033778	-167677809752281	-593779851063648	-2402725170114748	-524927248839678	-4269494658826058	-1497497554145472	-659217137202332	-2334416546380732	20483203786655	1969668039092472	-1928829309269119
ENSG00000274718	nan	-1735861782856	9435323471463138	9709425276167118	462642257071843	-49727951701283											-67969527964866	1811525326517428	-1947151228961791
ENSG00000204060	FOXO6	-658539946467541	71232192271953	330987642925796	-179143844298555	-1134915100687299	-813798104955319	42307222532698	257873132006268	-256695020473813	-1365862038518874	-355783898488069	10786227729392	28173697004246	-142531657828878	-56871262428931	-2578583718443447	-701456916388276	-4443881675129511	-1398747057648751	-56035626642229	-2235865965977794	-284145201721823	-896274615649587	-4769034753164415
ENSG00000112339	HBS1L	65862695898939	7881199629637927	8909042361852653	545652536271947	-41423057900953	-88730799302201	18078039689843	124960005057331	-330676725260637	-1438451821406513	-4294821624099	6932326593194978	7668579702472872	170427837566053	-256285168414343	257892442529554	2136560968708928	-1621964214084351	-168848819054585	670028737528576	-1007572649470527	-3098118650454066	-115458864098798	-5022488753314538
ENSG00000175193	PARL	-82666217751621	7358739351246935	8593777755165791	397453808627324	-562405403953725	771015278448316	67398412103108	376734632623723	1323587403593356	213665671041374	-726105106410401	237534	1.32828e+06	-513540257037342	-938012354684746	-323688432726134	1556272972136657	-2202158617072085	-2854646838857269	-2018958492971973	-3687749858071397	2692071786494669	4621428920765882	746033627129338
ENSG00000105518	TMEM205	-3561900691512	9884038529039514	9944991254376268	476408573826383	-483515964549195	-360348414497091	2061086683391291	4473259099570021	19831984586338	-916773425485665	125793357424021	2479086507826576	3562149272877539	339062791994088	-8759058803623	-13947003790905	1865428814736486	-1893258564619946	494550454127725	1333008842376843	-344358128105421	-1258190112559143	692452246634131	-3200999957257621
ENSG00000272361	nan	643214288910123	85831318813246	386079597594169	1119719835130183	163757508905112											2518574464238022	4384382984771879	64121007161468
ENSG00000143995	MEIS1	-486268328118577	470604860899029	1546919549631013	-6320750206818	-963980818602425	-114845962096889	5.21774e+10	5557072909621	-593998744973329	-169585594234514	-681104648306825	371654	1.90408e+06	-468424930356751	-893167127560735	-1904035739072788	-24749574659936	-3774570179187327	-2677729730936676	-1841589784839008	-3511443033181727	-4009953926932412	-2074002042831288	-5921239259401675
ENSG00000235724	nan	244777466819447	3177948845874528	5999604163183705	723889342870586	-235461492615091											958452397562442	2834466281800299	-921974702422386
ENSG00000260519	ATP8A1-DT	137931598813273	5735319436486918	7892248580211404	617485141416685	-342257312216138											540085953580509	241782923052534	-1340145176511701
ENSG00000197448	GSTK1	779099026755983	14449235681528	84632360313594	1254370785359858	300259481668443	789911093645109	5501378261086	32025298563344	1342261245680916	232667822006935	173196083832527	1116263916004488	1839612097790771	386413728362298	-40179200401641	3050645714393477	4911623207324259	1175698171221991	680911962813734	1519166741043434	-157962568231174	2758048288382516	4686630382831004	812381410275802
ENSG00000197892	KIF13B	66459550388327	7862462287769514	8897840044076435	546247637817249	-413634721089596	64067047766961	8222166345256553	910540453523612	622113835829367	-494379072582073	-114825313185797	2915669223497256	4059690772686926	98559269763158	-32810536680184	260229490231628	2138891152570617	-161963106855675	-451430122736754	387480965752163	-1289930259247603	223696075238025	2172168505914351	-1726170661377905
ENSG00000146521	LINC01558	88065596616389	3148100731354	2234694972023	1354891418169075	40239448402602											3448302791776381	530522251518683	1575618716019818
ENSG00000165828	PRAP1	78641604899826	7482868890439813	8671589776113874	558393169294851	-401472260777781	406746108275826	153493089770254	379857112736032	96282907253474	-151868041793638	13213776230789	903401489437236	9306525441448344	226567825347798	-200152303394295	307929629895198	218644828238177	-1572007652081427	51949317273178	890740363489878	-786889026299706	1420191989657515	3361807546283735	-530261438405792
ENSG00000259658	nan	-195992763581467	4238038734178472	6985660509566949	284236945619663	-675319825946572											-767430665086945	1112960214617875	-2644287134392878
ENSG00000089351	GRAMD1A	-318323153296918	1938279984093871	4389562146943186	1618865119116	-797067698321324	-240377697864981	3991168182234124	6203217781667875	318318769000715	-797576683377131	1179692760974278	1.34571e-12	1.60081e-11	1389555689338734	968770717835082	-1246428412882115	633883982422056	-3121003973127793	46379045970166	5462970472135671	380867486377698	-839301161226254	1111439683611902	-2784813410191711
ENSG00000106868	SUSD1	706006455981414	39064525114778	198802617532368	1181963625308259	226812695610414	-460263597614083	106235321692538	3017463538562763	98258175223022	-1015922471743956	390481316611046	3328340402976	9365264928093	60333909185619	177268568104557	2764443922156764	4628105214210405	888109411091146	1535158266008001	237199823568355	696922736255225	-1607053297284909	343077587052094	-3547188103654635
ENSG00000186871	ERCC6L	222053839957403	3648159300122645	6505249780323017	70126877532086	-258183655613375	23258148471212	9349889547764354	9701309652145176	581451948385157	-535080625495684	-358107817510931	9999349518337	26254237402114	-144858061082456	-571031951344879	869475601902957	2745893025920295	-1010945766166476	-1407883432030097	-569502407435627	-224498428726352	812079955555	2030193731828836	-1868283931150933
ENSG00000175792	RUVBL1	213321352444125	383984997472217	665464473185332	692574581496528	-266914260901479	-66891561098658	8145182212124124	9057471166081368	491561302558677	-624927488710422	-303314764559901	53242629854516	122562322907792	-9001257979747	-516341049273187	835282611418424	2711849978477737	-1045131386596673	-1192467214712395	-35388007067809	-2029969671149574	-233558127084965	1716332154421102	-2181992637484508
ENSG00000155761	SPAG17	-645006454975826	83996124508928	378853305455244	-165556653337143	-1121496868358977	-359755333190062	2068568738306843	4478602872034731	198913462757506	-916184562282016	3272332147414	26415646549907	64576860822602	540216479778562	113952337955991	-2525591882486614	-648254814404314	-4391341148776175	1286501435926629	2123834762603707	447998063165535	-1256119313836498	694524915409099	-319894388643651
ENSG00000187229	nan	1602176634594	513231197693935	7665260759739478	639688083224003	-319990734374231											627349427501773	2504767228065205	-1252958005260238
ENSG00000105364	MRPL4	701683608594864	41321701623179	20841814703944	1177679728728859	222470518647825	359858797987062	2067262056163574	4478602872034731	916287291498576	-198809904809378	266811518781306	142387068865489	299365338194342	479898763442895	53481527485251	2747517350051205	4611331158163555	871107151959575	1048956482932746	1886698600435774	210260018866661	1256480570829303	3199302575081574	-694163333170439
ENSG00000224790	HLCS-AS1	207216537851945	3977447089508865	6777615156796616	686496105318127	-273017324560587											811378555793626	2688049053734073	-1069028586255427
ENSG00000249346	LINC01016	-126971849737264	6043682636488374	789372724830496	353205729797044	-606564528913398											-497171881811264	1383014878597777	-2375068402199805
ENSG00000165092	ALDH1A1	608613319176289	129012394325063	54099297830586	1085405056487084	129027894510412	675131045234303	177216354352849	820033950818481	1228769051486701	117303871876908	-174391495659171	1091759144665721	1803771538582113	38983446134304	-3876077103671	2383090659988014	4250019792401062	505222545411656	-685611666151357	153261518604656	-1523860823106168	2357283039474499	4290361797087147	4095774140325
ENSG00000232386	nan	807442152948911	9602940891013	59516126034464	1282434512876582	328753881774882											3161626261773945	5021509739252396	1287271047818776
ENSG00000149571	KIRREL3	1053578843539063	1.59545e+10	1520413248862	1525825407686724	576531909529943	39033851296173	8911116536018748	9476655217341486	597173016369694	-519348619481359	2856143366477	7930663315788924	8472643935495092	241907128871786	-184810265188009	4125400845642111	5974532865550699	2257472463214191	112287884501233	951046087727926	-726572550791479	13629033396606	2085085307596195	-1813354164231966
ENSG00000076351	SLC46A1	577865980557824	182464795512867	72105896229984	1054902497255926	98175945432733	423592775593556	1371504074126551	3538341115010848	979545654818343	-134995758249889	325757576480687	2761887078372	67294807226817	538743566081346	11247531433729	2262696161260443	4130583753590927	384418433222737	1280700036020401	2118044074186085	442191216791893	1479013700523992	34201750531156	-471350286095974
ENSG00000138100	TRIM54	-133032040335506	5872252083570767	7892248580211404	347151947401543	-612603220865371											-520901207406642	1359310645006827	-2398713547542283
ENSG00000159592	GPBP1L1	-978923076989298	6.14243e+10	518985831077	-501316161989739	-1452062944352084	-1173541266672248	3.55233e+10	3916646980632	-619329519328152	-1720538421227601	-645436838971668	291275	1.38391e+07	-432672238141226	-857616246493732	-3833078192861885	-196295714486777	-5685708037220624	-2537503476819107	-1701029817814069	-3371676476851863	-409752883322059	-216244680505172	-6007420437489287
ENSG00000027644	INSRR	-187281348738517	4447004690926341	7159160248739643	292944302955527	-666644445370483	226279982429897	427352592532755	6438134594188524	783559447089889	-332409231524962	-724520655704641	26244.7	1.46204e+06	-511951614474128	-936433515648283	-733320186900874	1147054805200216	-2610317752239526	-2848417648126352	-2012712822157767	-3681542729344835	790077672356877	2735870921776363	-1160637848266337
ENSG00000271605	MILR1	-13052376085599	5942933497178107	7892248580211404	349657617303568	-61010388213939	-42863276347284	8805056520009267	9431237039790574	515529383412365	-600988761675612	-347384677089345	14132423668561	36244085961837	-134123650315805	-560329807759063	-511079770359611	1369121863973593	-2388927118973659	-1365725928058763	-527300594651934	-2202909331328726	-149661128847503	1800018945132296	-2098408338370869
ENSG00000227477	STK4-DT	169097288647322	4901581467567551	747735940409423	648533266857552	-311117545315919											66211855131617	2539401492283277	-1218214082800916
ENSG00000280095	nan	-84646670986392	7297906634190399	8556070565921078	39547632996723	-564379709178387											-331443109558894	154852994256975	-2209889220712546
ENSG00000139370	SLC15A4	436498969263912	747099651578304	2200531345191732	914545298797755	-43554608916531	202611815226992	4772798496107118	6825325924479944	760021437553562	-356060228900154	-449498039929877	3.60686e+10	1153633588626	-236364288595691	-662223370693558	1709158482031048	3581000104714413	-170542737791038	-176717963753461	-929254681314786	-2603498908186017	707438058141696	2653685765198774	-1243217512425978
ENSG00000231890	DARS1-AS1	-282860841331937	2482931937015174	5162740744651414	197369442393916	-761788947184382											-1107571930839124	772821198478805	-2982866243174275
ENSG00000177981	ASB8	744282814729005	23452140286898	128130072389379	1219887368909976	265268095942838	707807597320349	128993801660008	641040547949292	1261093717612926	150131540535649	-78905990433545	4686063871237434	5852196414663081	134477086081165	-292217231182422	2914319105882924	4776599695552596	1038685651325801	-310215055877473	528690110138627	-1148837803081143	2471376270062361	4403226385012565	524198282234292
ENSG00000197415	VEPH1	-1489007176101156	928055	1.88029e+08	-1016308068134521	-195499777518049	-1364697445669383	1.46297e+08	2.12066e+10	-812619239740203	-1908427035166079	-266609753094005	143122370078422	300839679609155	-53279623924018	-479697318935965	-583036713495579	-3979463131237034	-7655003253355487	-1048163250966246	-209466244855516	-1885906631174249	-476496846856474	-2837335899322251	-6663451064541605
ENSG00000106100	NOD1	-56540120591313	8175392547968314	9074810966543382	423537145166946	-536356898674097						100825282710215	3544000344421798	4729171029174427	314118145954824	-112559367940303	-221388900062381	1658405071008605	-2100162903730575	396389685218557	1234940182159831	-442521669435756
ENSG00000184887	BTBD6	94680599080956	1066277842804	8402643944557	1420313970796477	468974828854888	655393313230794	21343475369712	946045197557375	1209238177898831	97480683932799	813922052880998	67.6972	443.572	1025501616179708	601606358313973	3707320300799069	5561391529578342	1836321189825683	3199894884115744	4031709625818009	2365186078207721	2288366906498541	4222167929570911	340362903666225
ENSG00000173933	RBM4	-59948581397927	8067509949595477	9023844769336044	420134634136802	-539755607129881						-184811306358258	895752301883644	1524712315742396	28560392147284	-398014800203659	-234735093543935	1645082174514298	-2113470910837555	-726576644101571	112283789825996	-1564775789605309
ENSG00000251414	nan	-200994448236143	4120699058670749	687432189206754	279237261230863	-68030049389835											-78701529724862	1093383414711552	-266378947340256
ENSG00000158402	CDC25C	-14923476029489	9514433006135624	9757730650149664	46507216566493	-494850361292346	-20691339751991	4679755337522584	6749263293754866	351762232422976	-764299826265462	-299254662703112	59703352859999	135997385979613	-85949103699971	-51228800812925	-5843446934182	1821039893961742	-193763960947082	-1176505122132962	-337904712435752	-2014035337418613	-722457434088895	122821065668902	-2668624158593705
ENSG00000108849	PPY	-413039638511988	917296854988337	2578079390040953	67055624824644	-891235152984277	55906978793857	49671719102427	1789827165449442	111386259215814	80299674511	2774710129187891	5.67192e-135	4.02388e-134	2970484898322108	257660352970931	-1617300958965099	262563483552325	-3489726731259095	10	10	10	1952044330197889	3889155172664656	2803738061473
ENSG00000160310	PRMT2	1070260497708393	1.1656e+10	1189739316919	1542300266809506	593346096011936	766937237437895	7037908122619	390579450901956	1319556753501747	209565209186456	390237759878943	3357051057946	944153907636	603096051010448	177024716219939	4190719649867237	6039041941614393	232331021190948	1534200734585564	2371042732443199	695964044455059	2677832925793469	460735552987966	731716481957536
ENSG00000198618	PPIAP22	210590435104655	3901039087761683	6699894643789742	689855490325802	-269644439236519											82458941197662	2701203085666743	-1055821692387452
ENSG00000166326	TRIM44	-858630764903034	444345473813	30293980593582	-380235424777522	-133309925387677	-84696560368241	29055587765883	18802633265314	-290067848242262	-1398621729569232	74707129209502	4925992517474267	6072835356353055	288021656602942	-138675411758216	-3362060756389872	-1488852545340729	-5219892961019	293707437608169	1132343106094763	-545195622931031	-2957259433812484	-1012798957750558	-488341827120369
ENSG00000196911	KPNA5	1005751023631768	3.82457e+10	337442466435	1478575933315832	528339105984533	-369260255034142	195101308404473	4373865636502014	189399483118957	-925621414812731						3938125892371413	5789522486193555	2068768377402955				-1289306635339103	661305967771943	-3231893537580099
ENSG00000096093	EFHC1	-87616188834827	7207011707682789	849761366190541	392511201762053	-567339938317699	1501190547467378	1.12691e+08	2.0271e+10	2042343604609818	950890363512137	1011770776355636	1.11206e-05	0.00102797	1222492196514266	800137611520881	-343070574857963	1536919665389178	-2221480315075822	397772749822712	4806168491996077	3145702024698183	5241546869372863	7131033262224099	3320122429755822
ENSG00000111450	STX2	278549388440079	2555807245226074	52589819069383	757498993634405	-20168257741969	1369457183433518	1.34329e+09	1.96715e+11	1913100333337152	817437406682551	266312897974883	144210296699955	302946235129589	479400936050037	52982566269058	1090689975098374	2966068470410167	-789709740795133	104699617953276	1884741416302551	208298377162253	4781587537089204	6679768321161399	2854158978774348
ENSG00000116584	ARHGEF2	-739183880067723	25135302681972	136288774889636	-260144491840552	-1214836209036391	-2206937100097809	3.56079	1437.21	-1669233852468742	-2731551896533819	-301563655824811	55947463329465	128202353056817	-88260007123802	-514592994406861	-2894353680900711	-1018623630504174	-4756821337870351	-1185582816061306	-346989916623828	-20230972786347	-7705726809588688	-5828285748547765	-9537468322033564
ENSG00000161013	MGAT4B	1264609281590528	2.12635e+08	2.99707e+10	1734046559003507	789438565999012	661855708971493	2009250076004	903035962744669	1215633317623177	103970576284605	-384922127250873	4044410154358	11235179332715	-171702705057405	-597791614752793	4951713136300271	6789845093003358	3091131288110447	-1513302583967587	-675040816939697	-235018859980985	2310930964219565	4244497156635323	36302296837058
ENSG00000125355	TMEM255A	-133524480878672	5858421262003357	7892248580211404	346660012096903	-61309389904344	131742065445429	6440354121059932	8041365235991835	689504249399275	-426841163212494	41241296276957	7048408666576674	7767319968501369	254579331914193	-172134287005265	-522829411115043	1357384419614007	-2400634850521322	162138146403352	1000866236404747	-676737560334406	459989714074061	2407468422949546	-1490355748995639
ENSG00000182326	C1S	-269163335314185	2719554500345936	5464226632517065	211071674453659	-748159131479573						-78483314578979	4709919667697969	5871196876006254	134899711430801	-291794889578181	-1053937878432559	826473756209149	-2929497239440592	-308553326354507	530351641103921	-114717738764704
ENSG00000111012	CYP27B1	-36566425778232	8813896546727764	9398202293636788	443473736051464	-516438118211577	460156679702635	1063166763825011	3018273234693969	1015816432631647	-98365309704372						-143179757977016	173646892868625	-2022168784668528				1606679983420805	3546817858199724	-343451657090218
ENSG00000224094	RPS24P8	-129475719955978	5972581125557334	7892248580211404	350704549955561	-609059559163372											-506976053925202	1373221240944143	-2384837960468999
ENSG00000123124	WWP1	-509562981782576	374298620092091	1291456164838731	-29673223952819	-987111123821681	285488835395448	3165753768425379	5715308793281693	842415493955098	-273215912612713	-98104449797563	3675374299868968	4865883759813034	115280116921971	-311399705568152	-1995248451356943	-116188687670196	-386513936752728	-385692863223242	453218161460497	-1224252766263807	996810907137977	2941372301138534	-953958852081791
ENSG00000110619	CARS1	327883999479519	1807689695516096	4192570856378436	80657700331421	-152318036353416	459070551329582	1071459177821242	3032018446342905	1014739224406144	-99453630841042	-429343514129694	7.95183e+10	2440818858456	-21618110992475	-642115741257696	1283864930489346	3158238675684409	-596417591177295	-1687943101589301	-849905498004501	-2524446743011525	1602887664861967	3543056685168377	-347251631887827
ENSG00000108774	RAB5C	337642606611308	1681246657608745	3995324552605525	816282104611207	-142550734966925						-19025358760832	805252881959433	1393494529762283	23116232605933	-403450253444029	1322075802281855	3196240039648006	-55817267609897	-747972707604643	90880341912261	-1586145009121043
ENSG00000135631	RAB11FIP5	4.0699e+10	9986749552131808	9995103169490346	480368381438825	-479556276856789	26870484651988	3458797912224681	599261900913345	825735460952437	-289999478167013	76560574182133	4819280006925357	5970864169051511	289873660063945	-136822212459977	1593612357793	1880933865709297	-1877753983206885	300994166189756	1139624167443637	-537909860206343	938208043900701	2883132409531413	-101256023725336
ENSG00000008952	SEC62	-99440445438955	4.6799e+10	4055980435907	-516909211566103	-146736340102373	-502117793850461	779886751627188	2462204649104907	56309348234577	-1057422955532642	-95179712085648	0.00180933	0.151048	-739939322182916	-1162796199335059	-3893697184796243	-2024013401172604	-5745618614657706	-374194399447	-2909035383951397	-4571476588392059	-175319112877007	196609343466297	-3692090915124525
ENSG00000234224	TMEM229A	-69841123650749	7756539263104897	8840002625285719	410258729563833	-549619215138662	-525205384302881	652322784236651	2169424179684693	33161143612048	-1080307155900072	-2567428597626	9811866349577322	9860428892097132	210794162843907	-215926682514912	-273470402653081	160641201202323	-2152092924814053	-10093720407004	828726978090983	-848905229042335	-1833803605088553	1157852271171	-377199323598337
ENSG00000271980	nan	-297618418754952	2244526061296688	4827759690616875	182604754096886	-776471592959545											-1165356806412395	715008479516448	-3040357715851968
ENSG00000121716	PILRB	30168753665292	9020261712015296	95001895687649	51005722800671	-449858715211702											118128987352003	1997183725402641	-1761469998694996
ENSG00000070831	CDC42	1225286168404664	5.03546e+08	6.74014e+09	1695278713345253	749732952009672	2888444560842851	1.86902e-10	1.64222e-07	3392016576244969	2368365871596284	-448304330847141	3.78324e+10	1206986997392	-23516883405892	-661032487314263	4797739273418476	6638045439619037	2935659702350298	-1762486628451677	-924554810064381	-2598817008218451	10	10	826937042785023
ENSG00000006025	OSBPL7	123731767694178	6136248849420272	7908203874656463	603335797094046	-356442241130262	1546113542313	956756427570777	9793485342707412	573680915724256	-542855018422695	361223537633686	9027598246457	23855276443332	574141478872395	147977148085854	484484993418937	2362425956824607	-1395687785493039	1420132733846961	2257209243193999	581764945979652	53983996975452	2003060446194805	-1895428949467626
ENSG00000102359	SRPX2	658559192034596	71215353170735	330980807345303	1134934181110486	179163167490834						68577067388197	5287767204437327	6405828030820416	281896258099201	-144804556620229	2578659076523282	4443956386570837	701532578417992	269607398308491	1108261400400819	-569292057249941
ENSG00000198695	MT-ND6	-620634418616641	112215991639171	48224397255809	-141092376256757	-1097328015338435	-515837038599475	701845758490747	2288717339885505	42554806460574	-1071022049782104	-32188586554755	7675006041806002	8264491418988298	181184293504468	-245532160705573	-2430160562825274	-552462316316148	-4296705415246995	-1265478593176	71231721983068	-965297723715221	-180109315192474	148584077455388	-3739573421599022
ENSG00000065802	ASB1	-181290903670231	4594044138446465	7248001073162603	298931534982948	-660678358842317	-211681463915521	4577805083633835	6658175153473926	346997899200107	-769041944020828	628597304193043	7.41943e+06	3.40073e+07	84083003822017	415794521901957	-709863957400796	1170498453694533	-2586956901213138	2471299666517766	3305682317106291	1634675898960994	-739105582807284	1211575542691594	-2685181705213466
ENSG00000084090	STARD7	220549976625302	3680738681193509	6525532552239375	699771558619923	-259687247018577	502807421187619	775802179064752	2452804236925923	1058106592831811	-55617997050928	173882513174005	110214029096685	1818711652492237	387099337415794	-39492575169809	863587063897448	274003051351125	-1016833239413077	683610626316372	1521862179623848	-155263134595156	1755599026965414	3694477898543313	-194195426300081
ENSG00000167637	ZNF283	-336767641690232	1692305541930567	4010032397024823	143426516822752	-815411974110718											-1318649783386877	561601893789494	-3192832950444811
ENSG00000274523	RCC1L	263421522010941	2823188823929231	5590568012225435	742445160661228	-21681493226865	-84127963245923	31017278162755	19870715637357	-28434579515797	-1393006527232201	292100678887699	72825263839002	163398609470025	505146294671419	78789345820653	1031455193247695	2907123574488482	-848962097534528	1148379583414657	1985958039013141	309756473266605	-2937406334740896	-992819875494175	-4863812268301384
ENSG00000184857	TMEM186	21319642685684	930676536346551	964858985428693	50123068356855	-458689623246094	-7974213203188	7797288577211364	8867638108539568	478740289017174	-637727528582115	5200719743745	6328790821472742	7279943339279545	265338191510194	-161371145491108	83479345189648	1962622444951177	-1796048365275036	20446376213574	1043164168569507	-634422794017096	-278427094557695	1671566389339497	-2226685171040964
ENSG00000185668	POU3F1	-556073090028271	23124794165813	873598828186487	-76314438849422	-1033277662480459						-1268825328271307	1.04277e-16	1.41587e-15	-1058329972020028	-1478184067580922	-2177363763432856	-29881736188492	-4045909396074489	-4988324941436934	-4160772706902421	-5811408621858735
ENSG00000215271	HOMEZ	-31132286666874	8989135880705312	948224614109567	448897118939847	-511018258599645	-88805475324197	755450163809943	8729600664509487	46969668537951	-646754129073207	87027832702266	424087025633511	5432951851342354	300332502810043	-126356066203682	-121901804055666	1757704765464086	-2000946743657131	342145682936026	1180742597984434	-496762716271146	-310072603344066	1639989803399212	-2258202388908465
ENSG00000239213	NCK1-DT	-76983737939406	7534194054252128	8703279196869131	403127544784222	-556740356248074											-301438074182571	1578489093961003	-2179976515809505
ENSG00000152193	OBI1	-439339092353743	728367842432443	2157455401247081	40709079281644	-91736700521867	-222638990573605	4348294454902543	6489207396279632	336047989355372	-779938882376632	-86867721506262	424940065358001	5441512326603181	126516163907416	-300172523862525	-1720279288289039	159400761626606	-3592048798532044	-341516213572013	497392132590957	-1180113648548899	-777364809557444	1173342910755952	-2723229382252849
ENSG00000235501	CNN3-DT	-112542885141448	6460589499328708	8064783866402504	367618018618122	-592185338204917											-440673724971508	1439447739654852	-231876514034884
ENSG00000121446	RGSL1	-131832453216595	5906007049632616	7892248580211404	348350294019272	-611407917173876	-97845052449363	7314729670993398	8579606681411109	460675884071393	-655756150378338						-516204095514993	1364002899583186	-2394033207869622				-341635130340258	1608492833920177	-2289633786254752
ENSG00000164107	HAND2	-339270549292471	1660815066096017	3963760425366791	1409212527062	-817901033046813						100523202258028	3558438059097834	4745927392522706	313816332690045	-112861440633274	-132845018627287	551792263719225	-3202579127394727	395202070642784	1233753618018331	-443709253506549
ENSG00000066279	ASPM	-307939630884677	208780090816697	4614157840861163	172277323946583	-786739164881654	-446688593761864	1169650177065585	3213162373143733	111859650915405	-1002458036259214	-161437791120665	1381015620172753	2204925090736079	51940536242004	-374669175167411	-1205770618353599	674570320249452	-308056149381307	-634684808061701	204201686894601	-1472993602532788	-1559654904680209	390568408556758	-350017577082188
ENSG00000180209	MYLPF	64641711421858	7919568648809868	893190982349278	544435127171936	-415449514167202	478534441673421	930413989885424	2756849234621598	1034041286579542	-79948438888377	855808570373775	3.28221	23.1458	106722030882052	643623362158021	25311154698941	2131794072940779	-1626737085294778	3364569686284002	4195724632759772	2530373881106703	1670847654131606	3610451636281079	-279147434197207
ENSG00000224861	YBX1P1	28141733948	9085790831197028	9533772332837536	508035443682874	-451881631519309											110191974467651	1989267212262303	-1769390944239073
ENSG00000174032	SLC25A30	-370526378195765	1303803913727086	3343031396121884	109630917948649	-848978895074359											-1450835733191944	429271605430741	-3324267825943877
ENSG00000186868	MAPT	1100001125679926	6.58355e+09	7.10015e+10	1571665703467288	623329721747975	4540203880098826	3.99582e-51	1.69045e-47	497243893434189	4085487658303396	2971851968905356	2.77275e-158	2.21632e-158	316514300506593	2776094068231967	4307172265194587	6154025455153569	2440714311019302	10	10	10	10	10	10
ENSG00000184787	UBE2G2	-308741574892036	2075963776639546	4596014787981692	171474853904844	-787536898590723	-666219490400423	192843497700219	874456074823644	-108353190861963	-1219951423888608	13858096029555	8987160142792255	9272663184121548	227211814637163	-199508239706134	-1208910716037227	671428162821848	-3083685105622639	54482429160868	893272175995965	-784356921298378	-2326167514253819	-378325276099851	-4259574227574367
ENSG00000189180	ZNF33A	-100632696704664	6813367786814455	8258135180695141	379512937619262	-580314735188105	809706213531928	44274971504486	26772411964531	1361819621642039	252578657803787						-394038106052074	1486023569463006	-2272284522382613				2827164796507792	4754920277449641	881901951298163
ENSG00000073711	PPP2R3A	-834638137991177	6410279646951	41835815986783	-356102335722547	-1309355257999197	414891092644746	1454160975045797	3676032696129382	970911555429544	-143711069751546	947753083600753	0.0025221	0.208581	115877033594125	735880693377285	-326811505507067	-1394356849450592	-5126920801153653	3726045059086729	4555649102661208	2893079082600803	1448630962572732	3390028289470196	-501780609411151
ENSG00000143158	MPC2	898353348161865	2373030179324	17307128673254	1372398229522848	420202830996574	-235751502388965	4082564964187385	6278045765717137	322942829232314	-792977140206934	-47102010071872	6652877120976752	7520032911572455	166275136826663	-260436273730568	3517598787142854	537377231077759	1645349206625563	-185179257064052	653702596955038	-1023892517715645	-823148368061304	1127585021371735	-2768753676039398
ENSG00000167173	C15orf39	-673828829952108	58927264111784	281837994042972	-19449552275653	-1150071684820599	-731966363566396	101199167254387	52674754520995	-174409764330281	-1284984771866557	-103572743414763	3414389910447254	4593693660933035	109811959926939	-316863158698777	-2638448979826533	-761568058217794	-4503228904227742	-407191193079995	431720368727139	-1245732065983492	-2555728856613423	-608967965962568	-4486644230162471
ENSG00000188517	COL25A1	-268064293736995	2739187137009977	549086684379969	212171017053391	-747065443578197	122064490878612	6685652247794205	8191932092842308	679870491539153	-436502260403633	383029090257922	4319438610544	11955951591236	595902536051973	169807425674618	-1049634463382286	830778349945438	-2925214787281579	1505860201287643	234276177896251	667589618413397	426199559480162	2373831258475517	-152408837129489
ENSG00000152207	CYSLTR2	-131077869323768	5927285741064396	7892248580211404	349104090517183	-61065602066481											-513249441434128	1366954470534895	-2391089076527807
ENSG00000276651	nan	-46890977914429	8482613566905808	9240306560534868	433168840585704	-526734761440873											-18360664807142	169611900639102	-2062486394447713
ENSG00000169903	TM4SF4	-508850889729385	376972969035379	1299490292231936	-28959286839949	-986404132171306	2778310667264212	1.42114e-07	1.08946e-05	328561852496927	2255017721721061	1173463652612439	2.53972e-12	3.00296e-12	1383360559591997	962513066745812	-1992460178626882	-113393190411277	-3862371065970918	4613415161069881	5438614621458265	3784073213488407	9700730932999974	10	7873604786286601
ENSG00000111704	NANOG	-110608735204617	6517367068629218	8105123833991655	369549781421379	-590257708978058											-433100353662913	1447011763886173	-231121730157879
ENSG00000282996	MPP7-DT	316883759274324	1958524968330321	4420072539340891	795635988400132	-163326978371381											1240792311365426	3115397959533442	-639524283181455
ENSG00000198093	ZNF649	-45571986252663	8524799757056447	9265298829949314	434485377965541	-525419392068025	498881926485526	799286426673044	2506134836308771	1054215124504056	-5955323293765						-178441994898843	1701274049559745	-2057335924735497				1741892795933512	3680890473772341	-207935669587045
ENSG00000184047	DIABLO	55546723074842	8206901036397325	9088909735223386	535366322562753	-424528787661527	122814177924898	6666518812128411	8180326569461099	680616821433057	-435753887128252	-418773739379809	1187990157698	3555115388064	-205597003046714	-631569870030012	217499145650892	2096284196833154	-1662287953443846	-1646388547281927	-808294597633783	-2482986164236737	42881716175397	2376437138938534	-1521475356174781
ENSG00000087448	KLHL42	651062092848042	78051659794444	356521441567965	1127501147681749	171636100454456	-102662050943088	7188004836057852	8495083832371527	455868518743596	-660552765305988	712820467971782	54455.7	297360	924774436664061	500220805484477	2549303381395444	4414851547781939	672059540963319	2802418930267502	3635705628527801	1966593718320178	-358454130044962	1591707469313161	-2306381614836558
ENSG00000112578	BYSL	-142759929193748	5601874732568062	7892248580211404	337433608191282	-622295865814451	186601293188981	5127819924915318	7108119884457347	74409543833589	-372055588593381	-118392327664965	2768348435024264	3896332969859263	94992104304428	-331668984024849	-558991798507825	1321257446575493	-2436666137340999	-465453666321861	373456828598266	-1303940446685687	651535826538293	2598078652909227	-1299066803287803
ENSG00000213671	OLA1P2	-131204783007931	5923704416945657	7892248580211404	348977309647379	-610782482737854											-513746385562401	1366458046455474	-2391584252324357
ENSG00000137460	FHDC1	-777218066601275	14839625011885	86612738179127	-298368757731616	-1252508098022445	558745465900796	498045053417215	1792915103264464	1113541289111243	47765842419	-415958905163094	1320023057636	3924963358551	-202778432609351	-628761321423038	-3043280613375705	-116829483906921	-4904329655480415	-1635322163740877	-797213525323341	-2471944492264052	1950911929541204	3888033313096312	1667788957341
ENSG00000240463	RPS19P3	-263623407502915	2819500216167563	5588383477478414	216613001363004	-742646072530522											-1032245697522169	848171415437956	-2907910266439035
ENSG00000107862	GBF1	81578101224574	7392233376575117	8610878372616058	561320649346029	-3985402748317	440283382096211	1223142310156173	3292798264850079	99610428812189	-118276635402477	415583881591805	1338623222348	3974916662091	628387132746284	202402913815153	31942779588024	2197911144181616	-1560527146967312	1633847776847263	2470473387717614	795737191484996	1537290510492932	3477991066345716	-412973908648516
ENSG00000197122	SRC	163853914077028	5037148781873022	7598366573730531	643310320938168	-316357210899982	-1320755857255211	3.17303e+09	4.32764e+10	-768150420497131	-1865271807217191	-272749317776688	122188098347219	260714187378141	-59423461877663	-485827032750261	641587556394472	2518950487933007	-1238730554789634	-1072300650302307	-233620444348105	-1910005302301332	-4611542312520696	-2682068867644318	-6512770559435718
ENSG00000240409	MTATP8P1	-13184102928683	5905765412901685	7892248580211404	348341726866613	-611416462669915											-516237676036866	1363969353979038	-2394066668674954
ENSG00000142039	CCDC97	745628357039022	23025505370516	126022950232483	1221220262994959	266620190166985	266387173707632	3500578848164665	599261900913345	823431897973845	-292316845008032	62755886505932	5643408230765121	6687067775453841	276079357256906	-15062471831359	2919587720963448	4781818785152829	1043979921128094	246721709367224	1085392538228104	-592173739299703	930115673019627	2875089304451108	-1020651539807339
ENSG00000048545	GUCA1A	-97780842047446	6898919601494595	8301599701496765	382360934165343	-577472157832614	-220137083823373	4400105796458174	6531965489641106	338548275142165	-777450926919136	93529393904786	0.00695513	0.0563072	1146366746795208	7233770353522	-382871363585021	1497175205082531	-2261154106184472	367706253947795	4506884996426951	2843921560445482	-768629168691422	1182072891876878	-271454245362718
ENSG00000272092	nan	-161895868012812	508827631534964	7636137342602272	318313804225656	-641359836232446											-633920617238794	1246391805591899	-2511313156086661
ENSG00000228903	RASA4CP	212015748041753	3869029902718868	6664051264783769	691274639865007	-268219520936872											830170377494357	2706759917739665	-1050242272114937
ENSG00000109654	TRIM2	2376025504887116	4.87844e-08	3.28334e-06	2823785309858304	1917935362318124	559146923821678	496401812530714	1789537542569695	1113939009841823	88037451224	-27427103874612	117438758327774	251465191906813	-60946266904259	-4873462873142	9303582439262512	10	750988140480892	-1078283222132006	-239607278095713	-1915978177578038	1952313657331146	3889421992137606	3073909755353
ENSG00000272275	nan	516274532881336	349875455884342	1221275152898067	993774366188352	36402405307795											202152824878092	3891230006934812	142537518251349
ENSG00000164086	DUSP7	209052484256781	3935757618162723	6733212472982013	688324168192226	-27118194237052						4353736408852	968102637372762	9776215108437568	217712150784871	-209008641841049	818567400650858	2695207029782037	-1061841950641575	17116502510481	855924710530236	-821707289286259
ENSG00000228283	KATNBL1P6	-2241487749814	3603076039608416	6454786946019503	256089063175227	-703354415364717											-877678544447372	1002744165053659	-2754059572974079
ENSG00000215808	LINC01139	-213683057762644	3831789810777753	6646686304342821	266552648089826	-692934715119059											-836698907347335	1043715452888307	-2713260120262611
ENSG00000110955	ATP5F1B	260948953459376	2868629723292127	5643193126648022	739984484891401	-219288025232997	139046139015468	6257729123103204	7914010495954041	69677456387265	-419548834004121	-1048134455836092	4.35703e-07	4.2807e-06	-836645011897018	-1258680100910873	1021773586165239	2897488534867151	-85864575801142	-4120689531907448	-3289229090075592	-4948439474500717	48549256847139	2432853404310883	-1464893901132909
ENSG00000225285	LINC01770	-174204684650875	4771437994106087	7379179956847823	306013508344843	-653620511460023											-68211710759062	1198228679178026	-2559321143587706
ENSG00000198522	GPN1	-139831450451195	5682632267859689	7892248580211404	340359307652692	-61937809204013	-1350084085427	9622348299170366	9818460761496284	544809519449551	-57172704662543	-76341382908134	4831834103061375	5984614293786548	137041375444452	-289654640028913	-547525026224897	1332713336285325	-2425241281508147	-300132426378395	538771488798819	-113876310084993	-47139445577369	190225327217322	-1996238329924893
ENSG00000260551	PWRN2	126499874095967	6057127554252018	789372724830496	606094212879134	-353677191568371											495323810618805	2373226829376498	-1384860937677311
ENSG00000188171	ZNF626	724714514018842	30530210633409	161515388457811	1200501073048765	245606491053443	509674388134732	736071852226243	2363395848785457	1064913627592031	-48733573651852	58442029568987	5914177151648622	6918803932706815	271768578892341	-154937726689359	2837697327842738	4700690576999056	961698530774928	229761991057004	1068444923175161	-609130121533014	1779575682803309	3718245295558526	-170157819631333
ENSG00000137364	TPMT	779496193571946	14368023082638	84202479763479	1254764089565785	30065871449941	708031663391426	128707757018505	639758204762351	1261315330218527	150356684336248	-717957089704429	395814	2.18161e+06	-505370798342755	-929893082386359	3052200863615087	4913163232082421	1177261410146708	-2822613308274284	-1986840664255731	-3655829334725963	2472158617656654	4404000166103221	524984392821771
ENSG00000127220	ABHD8	173292182748657	4794550304130415	7393808665114316	652711628148996	-306925428488194	171857131614218	5466513207467146	7365960494549189	729426598500003	-386783255581952	39803342924588	2544112555373	7263899836863	610875082846029	184829958586503	67854410862415	2555762313602751	-1201799400205322	1564849028776908	2401625616990854	726649974427893	600055210653715	2546861029904047	-1350489826785616
ENSG00000185551	NR2F2	-97173915903789	6917178228162834	8313707975051272	382967029166764	-57686719602818	-3745632406025	9895189377435832	9955749414274644	554535260761794	-562003177955965	-150098770136753	1679791795693891	2599657029077304	63281932727323	-363342845821852	-380494879241548	1499548434999528	-2258785313421693	-590105999674743	248789834449569	-1428464690703484	-13078225042613	1936211605453109	-1962286535151995
ENSG00000188612	SUMO2	-536613639828597	283993175000336	103667602879063	-56797594553335	-1013964460368346	126710381577605	6567430957997358	81173346545641	684495477075705	-431864410334734						-2101168201229077	-222397066947252	-3970286483927038				442421120353856	2389979827023931	-1507894885031423
ENSG00000099860	GADD45B	-10134934984706	6791932826931248	8249836855993361	378797241732103	-581029044774321	-14917807951297	9582746625202826	9802132083070476	543396744405927	-573139373459325	841267468350579	0.954657	6.55423	1052738311463095	629036108619181	-396844238215606	1483221185534917	-2275081478100827	3307402052345679	413878936593444	2473024804733835	-52086918410819	1897320436285378	-2001169600846644
ENSG00000072786	STK10	898966537573769	2349689966305	17148516707663	1373004762849664	420819919651139	1391908845887777	8.946e+08	1.36066e+10	1935140937669112	840168158922163	-38034413638243	7268348032300979	7942800370590584	175340252028839	-251374451240291	3519999795984215	5376147257004635	1647765483369339	-149530443597834	689341655580721	-988266404226321	4859979611465022	6756725147748252	2933525521176999
ENSG00000127804	METTL16	215678867318058	3787502016271798	6607954055137819	694921829943761	-26455732636617	-157726788023869	5801161218208943	7605597017502629	400895514043449	-715366176763691	193679251160024	752197859073771	1313001500053179	406871554372574	-19689321891927	844513713498898	272104088126449	-103590255689426	761440536907214	1599595686983278	-7740760945188	-550717797535767	1399764093988693	-2497767755463728
ENSG00000067334	DNTTIP2	77825840426701	7508110016989706	8687126111309085	557579894919432	-402286757584438	-228634118190711	422558387666313	6398899258686152	330056461363023	-785900297138412	-31319490991364	40075817992619	94329023962642	-9990123057825	-526203719419924	304735416697095	2183263819428032	-1575196901595653	-1231310524658159	-392756819295751	-206874427817067	-79829735702515	1152422931713958	-274404421814051
ENSG00000102103	PQBP1	766712471086453	17204333694572	98486480081015	1242103944168174	287809259372679	755015722308406	79781925697489	433028769911892	1307772730266948	197579225447979	531488685013092	1.02798e+09	3.90018e+09	744005429577902	318489410993823	3002144828534736	4863591076330112	1126947991866787	2089521862835499	2925021087011569	1252125597625472	263620784334769	4566210513213267	689866301348046
ENSG00000136758	YME1L1	-32509568491941	8944671437853656	9464081982660486	447522590046724	-512391948030453						-161920677482321	1369265726935622	2188570310017893	51457536529919	-375151508877666	-127294698608041	1752322650311696	-2006325571804884	-636583252258909	202302797065705	-1474889874007947
ENSG00000185418	TARS3	98935203124725	686424185794507	8280227226087319	57862277305477	-381208144153875	747749075908675	86049865729621	46134925665177	1300589124507947	190274068724608	688856318851633	2.34247e+06	1.22028e+07	900892671422333	476195769346736	387391388064999	2265659463367373	-1492661332279066	2708205045903119	3541815632366422	1872140459613482	2610835669407741	4541128283418772	664359665019792
ENSG00000189221	MAOA	197790408773069	4195642882532518	6947896336776597	677109945070471	-282440046999222	311541265420359	2744064649510082	5252023870480715	868300380770119	-24715789873266	-400957132276119	2289951289104	6574352270766	-187757318900331	-613792479436111	774469537440046	2651296537621521	-1105924265544145	-1576343424752567	-738158748835743	-2413095219504382	1087775397466675	30317517987168	-862974865201847
ENSG00000132471	WBP2	-127798521189425	6020165988953334	7892248580211404	352379953244589	-607388288410942	2157443546566	9939629062451	9971930347006856	560419991093514	-556118551975722	145946354773449	1800572151429027	2749101733361604	359194941158439	-67435080693423	-500408802454391	1379781462030332	-2378293920772632	573780981043379	1412157405668911	-265117733273122	7532915449294	1956758690497955	-1941739814460068
ENSG00000182257	PRR34	88213576370444	7188773125936334	8488661034499375	567935447022728	-391914687088842											345409709759658	2223812093215047	-1534583948273755
ENSG00000198961	PJA2	717408750324316	33637287333983	175198611200001	1193262329925201	238266842637655	869721253561663	22285210843197	150045871415516	1421090606524496	312971554054063	1221572069413119	1.72071e-13	2.1619e-13	1431202289911695	1010846253327066	2809090827334225	467234650271694	932959351009797	4802551057140645	5626702052626111	3974092780997261	3036712908647088	4961870451616016	1092769383688436
ENSG00000148948	LRRC4C	838610744228649	6036757412611	39686704638405	1313287073124865	360097813629219	345781461855047	2250586628152785	4666423263763875	902308949552541	-212898813694515	-45341226106217	6770795862654561	7552797986473403	168035466421869	-258676638403707	3283670220431072	5142316244545296	1410001571282288	-178256820715523	66062324696829	-1016974597184556	1207328238198141	3150495889887698	-743356073148955
ENSG00000055118	KCNH2	463083128859833	586329002776968	1832767450334917	94095407115847	-16916800778293	478581452656341	930092278660787	2756253483721064	1034087901635651	-79901323004795	-1541255754514357	3.37565e-31	6.65523e-30	-1332276415522468	-1748865170542797	1813251607239699	3684406482412073	-66239545966871	-6059371885216039	-5237779798653167	-6875578186411803	1671011797364966	3610614397099036	-278982924693398
ENSG00000259529	nan	-259405313623858	2897247493046783	5679481925724674	220831962663601	-738448240217358	83679971605739	7691523372396746	8805610071897538	641649516319668	-474811138409434	-59182343569369	5867287634029623	6878666705775257	154197563957267	-272508370209435	-101572929899882	864691210443283	-2891473204247829	-232672499470035	606220207823893	-1071353376684319	292176428861241	2240379157178947	-1657847393371903
ENSG00000177410	ZFAS1	-1431557598536296	405858	7.46452e+06	-95817885534092	-1898475621696557											-5605417158671392	-3751851970396236	-7433684705427104
ENSG00000177301	KCNA2	-52284390693386	8310576241807399	915102410756204	427785289989657	-53211318928801	-275602279183171	3336343257393827	5881985006572154	283102600740137	-832590550380042	226327953157202	376058398962154	715539812329434	439476169353007	12973781385338	-204725133674706	1675039137221584	-2083546204944924	889797317662808	1727779141781136	51005789234523	-962291073629323	988479146184489	-290706759390168
ENSG00000082516	GEMIN5	-226833850616881	3545806075224717	6404676164222916	253404364972874	-706027516373957	877540222133	7582549503994913	8743542210324065	645706985369815	-470745895411038	-52597763273388	6290227365438925	7244547294984914	160780716728696	-26592835678102	-888192245785582	992231941595301	-2764526386380243	-20678554293829	632101552112433	-1045484374569842	30640135669852	2254546188961325	-1643653218123844
ENSG00000178971	CTC1	409411510561443	946202131142589	2642764271614309	887629629617698	-70689726177746	564323117460858	475618260760021	1738741532448077	111906685887961	6072952511157	-417870347130022	1228944054467	3670210772977	-204692408002675	-630668498755146	1603094635245653	3475608918210094	-276793196769492	-1642836904679038	-80473822630391	-2479442466998257	1970386820401939	3907326355521704	2120428034696
ENSG00000110931	CAMKK2	-685072580641641	51136832426318	249635548792643	-205786896603322	-1161216725109568	-440940090008825	1217571611872408	3285544941321186	117618741622371	-996755740481588	645172499339221	2.95635e+06	1.40349e+08	857352753263311	432407289770495	-2682475090342361	-805780642308364	-4546868503594017	2536464238436829	3370640566057901	1699988186206895	-153958346744584	410676811128609	-3480265673045233
ENSG00000157881	PANK4	441487857863552	714452397883578	2128532479349651	91950178613119	-38556171657043	242952572823179	3940834970357145	6158123910725585	800136621261215	-315744978883117	-241368258803779	26599688378522	525420435208087	-28022253089098	-454494637905561	172869300986822	3600407761922185	-150970821153158	-948927546317585	-110168122345139	-1786823518965	848291577398897	2793751672176339	-1102453055261438
ENSG00000272588	nan	339403312942174	1659157070099696	3961559403407667	818033060443602	-140788362374285											1328970036567998	3203096094812687	-551271917386322
ENSG00000100234	TIMP3	-286981271629236	2414654242141429	5074590984875094	193247237442676	-765888664992967	28739987685329	9197129491684152	96243151132575	586915116631651	-529614284526076	-1267775188127243	1.1706e-16	1.58457e-17	-1057274605907011	-1477140063390796	-1123705917144114	756680263326167	-2998919127510505	-4984196366639508	-4156623586462744	-5807304170265176	100348348670323	2049268893518056	-1849197691602921
ENSG00000272933	TRIM8-DT	220503874716504	368174027307152	6525532552239375	69972566012684	-259733340248015											863406546934045	2739850793043875	-1017013722391516
ENSG00000272564	nan	249779304375371	3080027644784027	5893892726632234	728867833614784	-230459310919805											978037628425336	2853960095720429	-902388124044948
ENSG00000174721	FGFBP3	760346206320397	18800932086438	106165619912331	1235798643133977	281410850204284	1054204263498914	2064211282547	18953740655064	160303919638227	498870970753593	628916698456222	7.29062e+06	3.34429e+08	841148432250447	416114629051677	2977217036741529	4838901994560846	110189433522217	2472555349497659	3306934067719277	1635934384619581	368085255155947	5597160930339569	1741854542973212
ENSG00000240065	PSMB9	-195579066207332	4247830728424752	6996509368893994	284650466790058	-674907856200188	-75362301514413	7915404287564782	8934694540122257	48311025228761	-633365126669042	556259878193093	3.14742e+08	1.25847e+09	768707982696803	343306891293821	-765810788693676	1114579401066521	-2642674022711171	2186908601589606	3022137970710659	1349694311936027	-263134507633308	1686824523850183	-2211453437715044
ENSG00000175166	PSMD2	1128167757024755	3.78042e+09	4.27845e+10	159946931212038	651734425782209	5934192496027157	8.97975e-113	1.20672e-107	6284271575920167	5560123270017804	-614632638458036	1.58237e+07	7.0784e+07	-401799114201234	-826908681305672	441746172808711	6262893463801197	2551935973035049	-2416398263753626	-1579653635656863	-3250951180859311	10	10	10
ENSG00000105287	PRKD2	-222720911401975	3633765793925458	648816077248905	257516697831077	-701932891594378	24480714334469	3904820890641454	61271813480805	801980387725458	-313891143821472	-341739169879813	16893721155486	42736300187836	-128472407023529	-554695158305115	-87208759161632	1008334221509925	-274849344434477	-1343530891600325	-505083007063738	-2180756981607211	854766983420775	2800189354824162	-1095980217166306
ENSG00000007384	RHBDF1	-809523438475541	9314380006065	5797797751174	-330846582345715	-1284494981907252	-549205315663755	538454750028074	1891879231681232	9091857816955	-1104089425617838	-163561163369847	1329923775027556	2133649583389748	49816658126146	-376790109848976	-316977575824897	-1295465241122422	-5029577726507143	-643032742576044	195851763590074	-1481331953868841	-1917601604817489	31745069909773	-3855031249775851
ENSG00000247157	LINC01252	285480654874519	2439365785920355	5108578464738106	764395610254058	-194748519410385											1117830091460201	2993072911709706	-762558693722823
ENSG00000187957	DNER	2013382743474634	0.00813346	3.4756	2469481293471388	1548383181467781	1982217987568942	1852.39	57497.1	2512681662200203	1439882595704325	-1165251893828004	5.83629e-12	6.80067e-13	-954263935232548	-1375193343398898	7883615852261113	9669518592612588	6062860245701557	-4581131031611912	-375164215496842	-5406505609027334	6921099060132699	8773262476542655	5027484435277848
ENSG00000145736	GTF2H2	700786523849642	41804671668145	21049421808603	1176790704924192	221569445247634	263670109289857	3549964900045515	599261900913345	820731299065424	-295033474256187	-1257732240032	99078305738391	9928063252984726	212103273676803	-214617593050143	2744004718614796	4607850090203563	867578902517277	-4944713005649	833873683530523	-843758607610544	920628789081476	2865659911375227	-1030136904310157
ENSG00000198060	MARCHF5	-728488313527476	29029799054066	15445029205223	-249397996068851	-1204240054866473	-1100387058774826	1066697276243	10535537948892	-545468642354533	-1648529238165942	-1199225112343204	1.79621e-14	2.20501e-12	-988393650703056	-1408980430393021	-2852474044155593	-976544574896581	-4715330960912613	-4714695084507317	-3885821468016682	-5539337894918812	-3842104090483515	-1904554661297318	-5755993655806105
ENSG00000170634	ACYP2	1569015349575982	1.0779e+06	2.42577e+07	2033662810318153	109731656241	-212171505008496	4567398071203553	6648868811333275	346508227395719	-769529303935947	2508676283430398	1.44277e-107	8.09096e-106	270754452669571	230766769033138	6143647710524873	7963024626857326	4296660570078605	9862738547059754	10	907248305951752	-740816607008097	1209865807896341	-2686883367831619
ENSG00000226149	nan	145812302068135	5518296410630603	7892248580211404	625336993589674	-33438404458106											570943691538358	2448573998980919	-1309316553519792
ENSG00000256162	SMLR1	170246580166294	4872130664867987	7452163426107983	64967804553821	-309969031500102	-1819890926587414	1.08575e+06	2.8576e+06	-1274571134592198	-2354241385128454						666618725397428	2543883995862596	-1213716953899687				-6354318980323601	-4450284043944748	-8220053465422072
ENSG00000272406	nan	-125936729438049	6073187030696935	789372724830496	354239720298346	-605533045619399											-49311875737363	1387063579190633	-2371029518845774
ENSG00000140285	FGF7	211770486308247	3874526477034091	6668718671452347	691030440084262	-268464716153002						16511342695201	8794606107884395	9129178190981728	229863681639817	-196856029018515	829210028898698	2705803727333822	-1051202360254684	64913539119919	903697861877201	-773929884236452
ENSG00000261423	TMEM202-AS1	-377433203596873	1233591592601974	322112780430028	102715198747441	-855845138234263											-147788014806907	402192365926413	-335115333670746
ENSG00000229380	PRKAR1B-AS2	-392188311809985	1093497744861719	294125901474795	87939551687753	-870512028073342											-1535655355186407	344336736754712	-3408583115329274
ENSG00000155254	MARVELD1	923699714129435	1569057675089	11890497941024	1397466501173721	445713414797189	121559833737414	6698544179589871	8198673548498827	67936809077313	-437006029640525	360358494482934	9288228294882	24507326785526	573278159165627	147111165998506	3616845198778578	5471929814320385	1745238630781391	141673185885797	2253815143841039	578360379607194	424437501983187	2372077079323003	-1525847328591132
ENSG00000065618	COL17A1	95619555188047	6964020744580388	8348101494345406	575317849994792	-384519245186673	298779291067978	2945596194574827	5485176480686496	855621417928806	-259923557057126	-202604273153347	627260559011981	1123105389716871	10760815240543	-415784975458042	374408613319944	2252718683026134	-1505626303134809	-796528825909785	42305620685968	-1634638367581992	1043215773222709	2987482016909356	-907547352378091
ENSG00000105197	TIMM50	-16505937870985	9463018236764064	9724914050922728	463493111052872	-496428939577545	-562674916739212	482155412341804	1753007385631768	-4419502022885	-1117434084077829	-633198647333068	5.76018e+06	2.6658e+07	-420406177407544	-845416929687581	-64630768232157	181485693644333	-194382070188038	-248938962282465	-1652806397830509	-3323715457366601	-1964631973792216	-15431103687217	-3901625369950549
ENSG00000078804	TP53INP2	307883108149189	2088637053762856	461505860540583	786682938665703	-172333883524713	-195865981348781	4920723835794635	6950286634643775	362800023271957	-753311562998432	-366564614505092	7562751988422	20220374432492	-153324093133471	-579471844074736	1205549297526771	308034133404026	-674791785337592	-1441130917267579	-602786199849056	-2278165314209725	-683884349716541	1266750133350977	-2630257612105443
ENSG00000162367	TAL1	-27355398527594	2642083869170174	5366393345465649	206679706041993	-752528278637084	-186593781275988	5127989661446335	7108119884457347	372063092720606	-74408796541232	-109958706291083	312501933365916	4275361410245434	103425995050713	-323243307440745	-1071129938785915	809276533323904	-2946605103260054	-432297294906034	406614259038567	-1270815309823681	-651509597993157	1299093004648203	-25980525604993
ENSG00000151773	CCDC122	68715823658125	7791742517188591	8861929890642627	548497253682432	-411382184269141	133372805589216	6399388844386575	8015046362893434	691127503708711	-425213096772395	-324944154351701	28303328893893	68848568563842	-111661132530942	-537931641862039	269064169963766	214769976452169	-1610811019292349	-1277502106562715	-438990300699681	-21148520336873	465683595446981	2413136166833342	-1484671203108624
ENSG00000148334	PTGES2	1081424258023795	9.4228e+09	9.85619e+10	1553324169049825	604600061816575	623971585634117	284373477584208	1179364889659194	1178136911723244	65931958334273	112823444370392	3000615720476281	4149837681219252	326105380826592	-100561199518318	4234432549502733	6082207211972065	2367376320802985	44355987305079	1282067411855956	-395351455019803	217865501270031	4113574956725987	230207584494626
ENSG00000075624	ACTB	1341942849074667	3.60985e+06	5.70818e+08	1810245711930837	867568370991988	529423882455851	630981809985155	2117329531303008	1084487855670757	-28930923538308	-2090031980695923	1.51435e-69	5.79024e-67	-1885077673395224	-2293166496949945	5254521005547088	7088211040508231	3397056910634516	-8216858873640817	-7411091003010482	-9015472324459316	184853288500872	3786590539324902	-101015019016817
ENSG00000007001	UPP2	12347352923409	6143653295540972	7908897849734962	603078458942289	-356700190666679	29767406065401	2963504001097782	5505509384815713	854523291728907	-261029020785547	935632890129503	0.0676702	0.0548094	114670419520047	723717188608963	483473833059979	236141832171938	-1396697814540408	3678395109136526	4508211658386569	2845258856396954	1039356758105645	2983647806818593	-911407182134338
ENSG00000166265	CYYR1	-886077093611223	2888578815423	20668213271685	-407849279877769	-1360254483955165	436345117214607	125696790443784	3350692155995619	992197440717712	-122221910453702	-371032123348765	6510360037653	17566138699426	-157796604046082	-583930299979713	-346952979713313	-1596977553621397	-5326222173888073	-1458694710560818	-620369658532548	-229569351631568	1523539691187709	3464349944094424	-426749204615074
ENSG00000116199	FAM20B	496755640827744	424937547893647	1427973157900685	974394779809754	16833445860836	359278949591353	2074592825478376	4482871586260025	91571156399275	-199390273705921	658296686108476	140365	6.85716e+06	870434558613031	445562061196082	1945099935629337	3815347160079319	65913160856659	2588061339108162	3422071046243806	1751705528964043	1254455976051267	3197292368775076	-696189745325704
ENSG00000124193	SRSF6	-701987164127106	41159422896494	207794301669434	-222775425624112	-1177980554872334						-611439895270134	1.87725e+08	8.33834e+07	-3985994597615	-82372572345569	-2748705954261597	-872301047893923	-4612509075159794	-2403846149509884	-1567074350163366	-323843753719471
ENSG00000244245	nan	33992059457917	8896847426561858	944177604345436	513870551890833	-446043041995267											133099550824084	2012115203642489	-1746529321392765
ENSG00000265148	TSPOAP1-AS1	490056454378482	453654996190746	1503596130033874	967742570204172	10117922665552											1918868553315257	3789299720629915	39617810263159
ENSG00000159023	EPB41	-1067276843888356	1.23334e+10	1251172959551	-590338538938192	-1539353792760706	-1225823527824693	1.55423e+10	1860920464154	-672154046969071	-177196655572096	-91627371577924	4000119526778709	5194215777752564	121756868208051	-304928195901592	-4179036833656789	-2311533799948072	-602750470678178	-360228545865483	478681193494902	-1198810341401092	-4280077226380711	-2346888572254078	-6186986567722471
ENSG00000177459	ERICH5	-641107199678884	88034726980005	393443435353471	-161642254764256	-1117630498928412						-503731098319269	3.64654e+09	1.30954e+11	-290683076960652	-71632165913315	-251032393059291	-632927567391149	-4376201965015765	-198039426352477	-1142806350525815	-2816183692686601
ENSG00000008516	MMP25	308220288984188	2083652697220034	4610193973703295	787018350191339	-17199648245337	-78217147524002	7838358454479185	8891568543253239	480261862173548	-636208636623383						1206869565212829	3081654673805938	-673470655292532				-273102468855385	1676879103989725	-2221381818042479
ENSG00000244617	ASPRV1	-6513384624884	7904097367699248	8924188958807414	414958207066233	-544925822609322	-538048556084946	589141629883814	2013304492849027	20281662598375	-1093034639909531	-315116650624887	37887776933578	89584738258823	-10182467410494	-528122012838202	-255038553633338	162481331970074	-2133715443500523	-1238865754607697	-400318743781216	-2076285955255906	-1878646737734619	70815317400937	-3816432433976803
ENSG00000234745	HLA-B	-380514803299371	1203232357735134	3159475163196974	99629482727221	-858908484869205											-1489946481876526	390109914235881	-3363148198673208
ENSG00000205758	CRYZL1	-161753308357758	5092009342698869	7637789700012639	318456256673677	-641217825667333						13365026562219	2195896323123067	3225553679358804	346911778110046	-79732907494867	-633362409635139	1246949593414931	-25107570985035	525439505799561	1363866748768551	-313466040003958
ENSG00000050344	NFE2L3	-392307955040959	1092415422149126	2939449143781324	87819733345803	-870630947502358	-644771417494101	235469273953063	1018613058787678	-86814614544283	-1198725828356074	-529793539262168	1.11264e+08	4.20694e+09	-316791193726304	-742314885663578	-1536123831076239	343867575199091	-340904875709499	-2082857479929283	-1245449139201454	-2918374796001674	-2251279566427425	-30312132716802	-4185463080257444
ENSG00000061936	SFSWAP	-181245303555217	4595173755419161	7248001073162603	29897710931833	-660632942833402	-41034345652501	8855685213039557	9450596069177772	517353468232584	-599166384765591	-35990500354223	9427629494615	24852868978119	-146657184107041	-572825570452375	-709685405264718	1170676904887699	-2586779069964217	-1414948981325638	-576575571925871	-2252035813371964	-143275246673043	1806387907483557	-2092045339347426
ENSG00000154134	ROBO3	-135243394018412	5810262139299404	7892248580211404	344942844305856	-614806642304047	302416561325203	2887174456745342	5420570386616317	859235212974323	-256285422487805	106718132656937	3269781677223078	4432900485659684	320005705927143	-106666591452218	-529559999683478	1350660665145382	-2407341280266951	419557137593919	1258086837258637	-419354505859445	1055915641711746	3000099919506292	-894844466062724
ENSG00000247092	SNHG10	283816769682994	2466972766111791	5142891052672762	762740084722157	-196413116873194											111131497071887	2986590524111313	-769076603438682
ENSG00000166578	IQCD	58940233313387	8099388351639543	9038450722356576	538750155728743	-421141233657412	922810983313526	11717977602762	86661443293978	1473489202702923	366429446247284	-62442618528722	5662868782128183	6704730364362893	15093792734292	-275766315514232	23078679858132	2109533958149161	-1649023622787498	-245490111582051	593405105334158	-1084161829872984	3222080653765251	5144825039374328	1279422602323054
ENSG00000171840	NINJ2	147124516178953	5482555114472839	7892248580211404	626644346067846	-333073010689139						-189874962190345	811298897068389	1402480288304787	2349499279235	-403072107141926	57608180648403	2453693077683076	-1304183059847663	-746484160226321	92369419126144	-1584658345363421
ENSG00000179331	RAB39A	70613845004459	38997398851011	198507912799394	1182094427257955	226945282728442	1392874643191673	8.78965e+08	1.34314e+09	1936088929600017	841146090590909	534243558046079	9.03451e+08	3.44548e+10	746752797861709	321249301948195	276496075905339	4628617383258974	888628570157587	2100352511904953	2935822231525368	12629759744083	4863351782868063	6760035150030113	2936940060847146
ENSG00000268034	nan	-127639413138272	6024688995509124	7892248580211404	352538889565465	-607229741326435											-499785797832762	1380403794223661	-237767311267601
ENSG00000267743	nan	-94967452383202	6983707255747444	8359090070033287	385170441325205	-574667844125138											-37185523491922	1508176131386442	-2250173515399822
ENSG00000143631	FLG	-99180734200021	6856874413218637	8274584201125667	380962945593948	-578867505748056											-388352791297295	1491701231046323	-2266617740449368
ENSG00000002933	TMEM176A	1021461251678675	2.88194e+09	2603538690735	1494098570306833	544166769644732	781189517476408	60449857035313	345762890328427	1333642611136349	223896665015035	-313984651012256	39163120915644	92328377282111	-100691669540042	-526992045753067	399964097353253	5850303034476173	2130743290290338	-1234415353299049	-395864391551708	-2071843544730053	2727596091397813	4656537616132228	781756097220618
ENSG00000095932	SMIM24	791830867619577	12045624867211	72263683221486	1266978060262559	313058312628025	112814564892031	6923464523266186	8333766111703252	670661473645733	-445735460786555	16835007501724	1220073129255331	1982394391859402	381573453448682	-45026534911453	3100498601424521	4960988342989037	1225813365151407	661860115328427	1500137436113103	-177019627619898	393902579807135	2341677113226808	-1556326951962111
ENSG00000171847	FAM90A1	505745871061245	388824795211067	1332397711131385	983321297047104	25846280113516						27352025970284	8016419396923234	8537411746949355	240698415932416	-18601926655393	1980302145350273	3850299894737413	101203879036555	107533157091284	946294091713856	-731325680740478
ENSG00000156976	EIF4A2	606374706797829	132374801861854	55163861529679	108318456868053	126781357538047						1784923643252318	1.1177e-47	2.97352e-44	1990702844778412	1577571103489407	2374325133368153	4241325234484422	496425989195294	7017340314546563	7826351216622519	6202143909869768
ENSG00000103978	TMEM87A	-750676161016073	21487504260662	118812934341948	-271692729871866	-1226220464248697	-1392346381575192	8.87484e+08	1.35344e+11	-840611190530812	-1935570408235329	223154385390692	403681362913324	761618207397615	436307086214222	9798614000799	-2939352938273253	-1063841993830481	-4801397608899195	877320590653748	1715320045867417	3852277340514	-4861507308143154	-2935072407376932	-6758224684303181
ENSG00000149970	CNKSR2	-321124686186362	189931739019495	4336895529328736	159082834552268	-799854218795976	-730675199778921	102537632623437	532985714967561	-173112049814302	-1283708078274959	-290554283479713	75981097861695	169749094944587	-77241731045855	-503602522968227	-1257398115075815	622905883326744	-3131914892602897	-11423000052323	-303672101203053	-1979888775798315	-2551220637773713	-604436874643051	-4482186535361849
ENSG00000228719	nan	-131469897260632	5916226469547898	7892248580211404	348712472336421	-61104665310819											-51478446882403	1365421047588912	-2392618639713455
ENSG00000236153	UBE2E3-DT	-123137909886534	6153282345401666	7915143156717176	357035433558775	-602744008726811											-482159679545306	1398010494003392	-2360108746066624
ENSG00000108309	RUNDC3A	2090362884931882	0.00483485	2.31911	2544793418530183	1626721376392712	3543291047168334	1.39552e-23	2.45236e-20	4022000721854181	3045260367973481	934098868195115	0.00766048	0.0619324	1145176970179744	722177729813772	8185039844032457	9964411287459244	6369601841331751	3672364176662594	4502207447647449	2839206549169742	10	10	10
ENSG00000127415	IDUA	184891680165338	4505336755539763	7190693524120823	664264534839139	-295332731117426	-179592355292095	5287453111004621	7229075014860554	379056988086772	-737122606985492	-9330018968897	9317095898393504	9512020981628688	204034479394655	-222686022791235	723963183565953	2600998957562918	-1156406951571869	-36680514874366	802151612045869	-875479245919803	-627063465882258	1323512842904642	-2573732361629281
ENSG00000102144	PGK1	683334547609931	52276837927758	254610189608804	115949402884645	204041422200202	53487193180527	8511991420242551	926821619538826	611573873084265	-504932878517133	-73515357877139	13384.4	76318.8	-522612874378944	-947028575725284	2675669635788353	454012310180066	798946050267307	-2890220466963921	-2054627045893191	-3723196691683476	186755525765808	2135367242528367	-1763020259553306
ENSG00000167685	ZNF444	-446053454921678	685607459414901	2059978774193462	33981625893266	-924037523504184	277820176089292	3297568164441774	5839803479792476	834794719652367	-28088476934174	-97914668059488	368464959236653	4875970862922673	115469891626973	-311210089534687	-1746570094321801	133058697083808	-3618167927579371	-384946745569082	453964251464473	-1223507300069245	970035067624278	291476365658234	-980735380915865
ENSG00000131069	ACSS2	-159616274867616	5148140369517629	7673044923065825	320591659700062	-639089000009104	9740285441685	6104798379742	49245804726415	1524010724966929	418032382381363	597287248145136	3.9632e+07	1.71132e+06	809615930838431	384416702320546	-62499462603597	1255310992758566	-25024214535496	2348205707072336	3182965575165807	1511315530486074	3400911546491836	532122564841467	145959906879518
ENSG00000154144	TBRG1	-415288841409867	899736235672075	2541327122317311	64802655127349	-893470279586178	-133454035537313	6397351143026099	8014668870986082	425131999230386	-691208360002423	-777087147388947	856.562	526.668	-564662919814399	-988808143653519	-1626107953898447	253741739312277	-3498478608947362	-3055080248336199	-2219944750198495	-3887451026850964	-465967217390155	1484388043473661	-2413418484127366
ENSG00000089775	ZBTB25	45265308050566	645607925147723	1970028036824387	930593635961646	-27368709716222	-651589258517722	221110823446323	971025905734575	-93660663240889	-1205473498104128	320620801656126	32208102173992	77209407640598	533616203318642	107333789597029	1772411635400612	3643839088349159	-107165115263867	126050505614022	2097886097368394	421977562849626	-2275084694519613	-327024944982432	-4209023198793457
ENSG00000204860	FAM201A	76691682266719	7543247034269004	8708840918458538	5564491881666	-403419142704591											300294498904398	2178836415989826	-157963087686093
ENSG00000176788	BASP1	1673153966566268	55011	1.48841e+06	2135963423520577	1202851143270006	2783022917343016	1.18566e-07	9.15085e-07	3290173569487539	2259864599441418	-140949591719846	1954322560956061	293439082356896	72432627729485	-354203508600411	6551413623090674	8363593638662221	4709892528744271	-554136450617196	284765345888136	-1392533831826296	9717184193840128	10	7890528112099058
ENSG00000092148	HECTD1	-715736353994693	34387828148458	17867567064737	-236586762249337	-1191605204425062	-319421287791982	2624432621681684	5112138748492332	239274691689409	-87612824620021	-504417659676128	3.53681e+09	1.27065e+11	-291370804275908	-717006434212083	-2802542380319762	-926380816240219	-4665857850271486	-1983093446039445	-1145510116949104	-2818875852536665	-1115289230845289	835449912245089	-3059083521267403
ENSG00000175893	ZDHHC21	-36290022586262	138488408639261	3485189129310311	11726635678685	-841397023611	25982332577649	3620631818119143	599261900913345	816907687296115	-298879500518732	234149952269078	314756771495753	611680788610835	447286931897472	20799906819366	-1420974716641468	45916898428675	-329458019588344	92054912596319	1758486774064359	81773819969348	907197385509384	2852309414109619	-1043565663870347
ENSG00000106245	BUD31	1482183209555155	1.10923e+06	2.22021e+08	1948285589596609	1009401683515161	236921452122995	4059334213687676	6265719830386887	794140372074491	-321773442088457	-256925708064592	182590301144105	374617615529689	-43589165941175	-470028485614451	5803647162803593	7628720971537037	3952420442288069	-1010090899888549	-171368681563947	-1847894084184809	827233356723186	277281520864366	-1123501997045936
ENSG00000066294	CD84	85720065900711	7265006184885375	8539471148828607	565449756226762	-394404531540328	381348374839748	1808673111764298	4177390076408678	937621522101589	-177298382147881	-51129063778191	6386316898466644	7332268816548373	162249072579392	-264460650716084	335646102352831	2214079104578679	-1544333200993347	-201011422450525	63787432157859	-1039714159704732	1331513433557072	3273793031883582	-61905384460349
ENSG00000257084	MIR200CHG	456716574793108	621950725520243	1914911808473668	934630132383664	-23296823357532											1788322682658726	3659644422572546	-91221207951651
ENSG00000225573	RPL35P5	-17742955773498	9422842509722008	9703602654351344	462258739892467	-497662904988374											-69474444367452	1810023623910339	-1948652425657432
ENSG00000279531	nan	-13184102928683	5905765412901685	7892248580211404	348341726866613	-611416462669915											-516237676036866	1363969353979038	-2394066668674954
ENSG00000109917	ZPR1	-74450473621445	7612830175871261	875467340333935	405656811383009	-554214763657801	70374718821633	134275531592954	660961973549031	1257077673256286	146051699348914	309031892709071	45213912180373	105495147096327	522048116083229	95734578738431	-291518806323655	1588392708322165	-2170087287422324	1214943825404546	2052406726177287	376375830650789	2457198972807559	4389203991412817	50995313604952
ENSG00000130511	SSBP4	2289364020165632	1.90385e-06	0.00115828	2739227485952427	1829504440325259	2565533068324994	3.47244e-05	0.00020821	3079693202907409	2036430719782273	1766082814113286	2.14799e-45	5.63807e-44	1972012467277616	1558595354830162	8964250110650357	10	7163620654977576	6943268513001087	7752870908360454	6127541678805928	8957798092479426	10	7110387873130045
ENSG00000135472	FAIM2	-132303027503114	5892755014636251	7892248580211404	347880208002692	-611876812796203	1154933865710911	4.72833e+10	5088024679418	1702227809033701	600536612866289						-518046679552674	1362162227418767	-2395869218917801				4032559356547155	5943487226490086	2096829618614077
ENSG00000133884	DPF2	-749830319785998	21738476802639	119985026883252	-270842726566069	-122538261646245	-157507973604025	5806417896289797	7610305039629399	401114030885803	-715148427687197	-476037206116201	1.21099e+10	4.10412e+10	-262943834874925	-688698149317758	-2936040956310793	-1060513714814594	-4798116926122486	-187151707600027	-1033750872147785	-2707583210089138	-549953786571775	1400527065933113	-2497007464245446
ENSG00000275763	ZNF516-DT	-175096539438494	4748907629555563	7361781013297212	305122214427437	-654508821847471											-685609260567682	1194738722348378	-2562799418086139
ENSG00000177034	MTX3	-725278448536684	30301598291296	160542563935953	-246173062619314	-1201059813192634	-479475425319449	923991484468401	2743869161923908	79005350804996	-1034974340610795	475789414616967	1.22372e+09	4.14357e+10	688450972845976	262695652418651	-2839905473869074	-963917002445363	-4702878383897559	1870542895797241	2706611447836562	1032775154916205	-1674133186332891	275854554156543	-3613709481492482
ENSG00000169762	TAPT1	580748324952633	176739575173488	701389392023481	1057762276680585	101067708432659	442647955582677	1203176909380969	3260355859544274	998449915907182	-11590776938392	-491319221892592	6.29323e+09	2.204e+10	-278250469791063	-703941730003306	2273982289561799	4141781526333979	395741441081569	-1931597576250581	-1093928161346187	-2767512604652947	154554663945424	3486181044623593	-404702791910884
ENSG00000005961	ITGA2B	-112363719065414	6465840394063112	8067971929967954	367796965074968	-592006777664956						388383959346034	358329212613	10042655149627	60124616880858	175168677484446	-439972181004377	1440148423679521	-2318065967423082	1526912608136072	2363770010721234	688667118621188
ENSG00000224856	RPL35AP36	-37438692585113	8785819469428472	9396380345262524	442603169436953	-517308066600939											-146595212116779	1733060131831876	-2025575160796092
ENSG00000271973	nan	-184852264153871	4506302519105472	7190992805049707	295372126209416	-664225279322898											-723808845949898	115656120727547	-2600845248383116
ENSG00000184923	NUTM2A	28230918898505	9082906336234052	9532603370375362	508124399113428	-451792627938831	-212995598494094	4549926748970196	6640457201828668	345684748887717	-770348882526243						110541187696911	1989615526781603	-1769042441183587				-743694006307469	1206990555848628	-2689745002952769
ENSG00000119401	TRIM32	-301319906689559	2187381277177421	475518628914607	178901154044234	-780153960774198	944578001255155	8916075118854	68604828592199	1494963921931668	388356620500371	-251267740740094	209812181558713	424599861064804	-37927637234983	-464379221014171	-1179850379009456	700506636694882	-3054776421570759	-987846877095371	-149110657372204	-1825684275727764	3298082227942501	5219806025321773	1355983377205603
ENSG00000083520	DIS3	-317321072763588	1952357879865739	4413091064091984	162889341164721	-796070969411702	180711269255242	5261800722823192	7207688339835129	738235793428814	-377939314351905	-272804040118363	122014402288792	260375020105282	-59478223031426	-485881666568863	-1242504659187788	637810667808945	-3117101174289484	-1072515788521689	-233835735155319	-1910220092496567	630970258388063	2577619155965194	-13196103807716
ENSG00000078401	EDN1	-720030220001127	32490758895922	17046369655091	-240900411485465	-1195859809334412	-35659818568719	2108729336534522	4516629394765894	202073395058271	-913049803494366	-134550217434434	2165004266970948	3189192826554519	78832850395427	-347810805712635	-281935547272632	-943271372002282	-4682517211645853	-528977622489921	309927509382118	-1367401231973695	-1245095838743516	705558113883769	-3187998583631768
ENSG00000057657	PRDM1	-79572243244813	7454106256284033	8657665234405933	400543060817286	-559320959119025	490508103079085	85131114573163	2591341446531263	1045913317362223	-67947258151159	-42087372071614	6990781881237609	7718742542162783	171288445991213	-255424872216869	-311573644046526	156836927007869	-2190081142844656	-165464452156236	673412177610029	-1004190436897005	1712654810166308	36519039395127	-237244191848614
ENSG00000145819	ARHGAP26	-668224794273872	63195899014948	299197642797305	-188868207602867	-1144516399980884	723307339855886	110480702978742	566539093052607	1276422439902415	165707168428104	535035367065324	8.70435e+08	3.32603e+09	747542443887996	322042559234183	-2616505777694319	-739533702805307	-4481476591227074	2103465470475015	2938926686394031	1266094626768481	252549506737313	4456748049176722	578582040349441
ENSG00000148143	ZNF462	1087314629620603	8.41544e+07	8.88884e+10	155914027323522	610538517425211	-169482255378416	1.95039e+06	4.40283e+08	-1147409672570353	-2231973644304489	546137306973394	5.13653e+08	2.00923e+09	758613775878622	333165087837569	4257496930603052	6104980791065752	2390628980003489	2147112206166532	2982453088549804	1309822305912235	-591763108681773	-4006287934130472	-7793144239792891
ENSG00000273749	CYFIP1	-374668410578947	1261335119712811	3273725533050712	105483607076262	-853096644777079						-544470434399943	5.56345e+08	2.17094e+08	-331495090370106	-756951532277178	-1467054304778725	413032365353924	-3340391316093586	-2140558977879648	-1303256792256835	-2975918058840771
ENSG00000124795	DEK	-1511321281021681	515002	1.08635e+08	-1038894858381057	-197694331326397	-618445877159668	298748895680502	1225299555084575	-60385064800458	-1172666434144677	-1679479260911438	1.10778e-38	2.63023e-38	-1471391325874399	-1886081219288454	-5917740403575783	-406790412846739	-7740933359035616	-660279086424354	-5784703288886266	-7415036394781543	-2159361485969691	-210840088152497	-4094474273821817
ENSG00000162032	SPSB3	-839143416811627	5988240567014	39452045607768	-360633564624121	-131381426481902	-62221837689547	8272551806332165	9131561379062262	496219829356592	-620275672810976	-28130058883324	97559048065193	212616133957856	-67980953187791	-494364315936199	-3285755957001944	-1412099361704881	-5144380520108742	-110591955571185	-267263804381436	-1943569215079261	-217253352080115	173259783541323	-2165750388220565
ENSG00000143543	JTB	702116443432373	41090486612407	207494914459886	1178108671510584	222905280757834						697511845472212	139072	736201	909518723420963	484873003682508	2749212161232763	4613010729583684	872809509583101	2742233826981702	3575728535405269	1906254583516413
ENSG00000178828	RNF186	-787982937642563	12730014403251	75778419072088	-309189970746495	-1263167939572239	231441431641328	4168826110466439	6350392244689325	788691687008302	-327250695443061	925226906337096	0.015632	0.0124668	1136344122314215	713274522129333	-3085431619320152	-1210666458047909	-4946069407197724	3637484490996066	446748153673616	2804204022059419	808099353882414	275379061632987	-1142626338204373
ENSG00000156738	MS4A1	208344995827799	3951791407549105	6750228224157088	687619721521261	-271889217211885	2784736505906	992207625211982	9964759608838924	561045311749573	-555493196812674						815797153904634	2692448693365232	-10646113610626				9723167348199	1958942055915923	-1939556328557728
ENSG00000272631	nan	-91577738326002	7086364402334806	8425722958651688	38855537671939	-571288964688647											-358582446343583	1521430208595042	-2236943150942427
ENSG00000071967	CYBRD1	-5252426007186	9829008738529046	9913705858741164	474721871513741	-485202524154481	-469789374460354	991827239994772	2883468223171365	8871258858305	-1025369445870802	95848650832376	3786563177472634	4981355267355829	309145866281427	-117535822344722	-20566436792648	1858824351112723	-1899862469457767	376824299528789	1215391906949721	-462086357397422	-1640313435973599	309748280620287	-3580173095295539
ENSG00000173281	PPP1R3B	-1152866515775275	2.29874e+09	2.72022e+11	-676648300786621	-16238435913918	-739506122702305	93688899821315	496825189512058	-181988151634165	-1292439666166106	397492243670361	2593968163739	7399071146851	610335060621341	184288100046832	-4514172364277791	-264948891996608	-6358333565825706	156272138406163	2399502545932671	724519683986848	-2582054629155305	-635428612357246	-4512673689209646
ENSG00000128655	PDE11A	675916383490864	57404728616869	275657890796326	1152141002086677	196591825746273	557404860210584	503565428593395	1806808892133832	1112213150304738	-86713559811	-37894174206752	4973861428981	13626436436563	-165715288089	-591823682399972	2646623019374612	4511331537696257	769776357178656	-1489790991075472	-651501578927346	-2326725964614078	1946231079684768	3883395992527599	-3027684851375
ENSG00000236810	ELOA-AS1	-125867303922367	6075168186446556	789372724830496	354309069670611	-605463863671109											-492846914328508	1387335124088048	-2370758629514872
ENSG00000129083	COPB1	117848385386069	63059065393412	7979090380958628	59747276808605	-362318882207558	229704261912405	4203894785353866	6383884688536026	786964381121023	-32898691794366	139986811374445	1985021667105422	2971896580169275	35324174311387	-73395546885633	461447979627374	2339468638560353	-1418698403273077	5503513266107	138875269768795	-288551015622318	802033863682274	2747759566653204	-1148688521068435
ENSG00000270362	HMGN3-AS1	-328758243802239	1796082263250202	4175069159777274	151443050509867	-807446491226151											-1287288127804254	592991490358132	-3161643248763295
ENSG00000124782	RREB1	-477843433146283	510215978502931	1646960660823987	2123767588719	-955614092292144	-7940060451467	9777842800812888	9895663792343526	55035363246843	-566184260685836	69454344503648	5235176610309329	6363935439679679	282772877667286	-143927420563366	-1871047160138914	8315839540796	-3741809365881939	273056370533469	1111707787510373	-565843639589928	-27723461936415	1921611060088005	-1976885175631258
ENSG00000163728	TTC14	-575397643916947	187495920606401	737148529043459	-95699606808567	-1052453421727852	444921445905024	1184221654650184	3232852565813981	1000705132064234	-113630092756502	84746134605117	4363377238281442	5556044468236571	29805267902961	-128637561697021	-2253031124677705	-374722064017074	-4120994135959066	333175298066468	1171779581899699	-505732304613699	1553484743049252	3494055342265353	-396750071441103
ENSG00000166165	CKB	577582873588398	183035784954292	723045066133637	1054621602386394	9789191768506	397824613196963	2.38378e-34	6.48302e-32	4437951514211352	3497657451669386	-2358427732050747	5.23584e-93	2.5692e-91	-2155915759303668	-2558911847940793	226158762558868	4129483879633311	383306292145094	-92720436897282	-8475877738367364	-10	10	10	10
ENSG00000139826	ABHD13	539327952249327	276064890118309	1012190932665649	1016658589243567	59519693260576	7907476885678	54516224656329	317953319446986	1343087922270985	233509217937311	-5652409463422	6036447509602091	7024164762342463	156855258855716	-269851987206739	2111796382332452	3980835634195442	233055736089707	-222221723332221	616668805793423	-1060909936369007	2760969337615981	4689516801280661	815319222675571
ENSG00000063245	EPN1	542535474939618	266942434270476	984273105098997	1019842170638482	62736508728436	97765421999343	731683084553167	8580203068584581	655676854725375	-460755353100611	222812010155015	406761710709432	766692874485929	435965192231844	9456068763803	2124355781090398	3993301288246198	245651521713882	875974559100465	1713975906338024	37176073499957	341357093193866	2289356918083523	-1608770307450777
ENSG00000260733	nan	-38242327990259	1184725434952665	3126124931704918	97718410978293	-860805611744511											-1497419326496641	382626908044691	-3370576602217635
ENSG00000239523	MYLK-AS1	122213541218511	6179837034333838	7929882638730212	601822854535421	-3579587597995											478540214985884	2356501868134867	-140162587682704
ENSG00000242071	RPL7AP6	-5347347768233	8272752650881814	9132253912969842	426598339810134	-533298935092044											-209381131182452	167039150662007	-2088189119685169
ENSG00000166126	AMN	263515845440294	2821465053648889	5589416497698372	742539029250275	-216720587670228	-27198986812712	9240044473500568	9649333333201704	531150962496266	-585379398140497	-121819928861328	263164294236774	3743294353565193	9156430686129	-335093269652857	1031824526741437	2907491127006273	-848592681151028	-478929113379977	359980610005519	-1317402858748401	-94967800336074	1854563146119986	-2043906789111572
ENSG00000225982	nan	-266151675768042	2773583205385937	5532011622003791	214084131190284	-745162114919704											-1042145402800921	838269353325533	-2917762099990605
ENSG00000273416	nan	60461179529582	8051316674147333	9013473708863246	54026672898982	-419622921158675											236742226449813	2115472263243357	-1643078507521898
ENSG00000272030	nan	-242909605421868	3215032996486488	6042073791040968	237329420863172	-722030138762316											-951138586131652	92928877561348	-2827186368913368
ENSG00000132466	ANKRD17	-12839241583934	9582181025611912	9787310140309974	467151875901448	-492771205227198	-171204477565456	5481757323583053	7372307117177009	387435123403494	-728777222827651	202761358455633	625225464083523	1120142781240916	415941853539292	-1060366555991	-50273426058788	1829183222219551	-1929498451130385	797146399120113	1635255126112916	-41687794375306	-597776408144704	1352765884108927	-2544593674152169
ENSG00000177112	IRAG1-AS1	654369299411945	74966672367774	34535983375075	1130780158555031	174956459796881											2562253103040963	4427690866179856	68506076372237
ENSG00000260339	HEXA-AS1	247546090465517	3123498297805066	593635570418529	726645073061147	-232692708193627											969293240087711	2845256638619077	-911133230363836
ENSG00000226259	GTF2H2B	-129475719955978	5972581125557334	7892248580211404	350704549955561	-609059559163372											-506976053925202	1373221240944143	-2384837960468999
ENSG00000141452	RMC1	84948958309888	7288636218712881	8552651097440302	564681054797417	-395174493360885	727345751602769	106061914478912	54868306980769	1280415858963804	169765796331864	180858379124588	966484386819462	1627027678749684	394066753293212	-32514604355405	332626747962061	221106917177098	-1547348068997879	711035903329737	1549254235586382	-12782958241226	2539595558802965	4470691444446984	592753118377338
ENSG00000229544	NKX1-2	103750188683659	6720313620423675	8198449590308936	583421996743616	-376399573875284	785315023178295	57820965385946	333397262554755	133771952723542	228045516659631						406244979913765	2284451337925033	-1473832860147836				2742000679498095	4670772549100487	79624219985823
ENSG00000228395	nan	195676554069806	4245522054809637	6995853748617838	675004937094064	-28455302059806											766192512864351	2643054153352697	-111419784006106
ENSG00000278727	nan	229650290705438	3486354864852816	6336339639184395	708831322035	-250588246342687											899220318714613	2775504987854651	-981205127370959
ENSG00000204442	NALF1	1625717223997297	218597	547433	2089376503716867	1154765331939124	-296205993501666	2987403010266866	5532278877203303	262497376717739	-853064640117226	797339784122088	21.5258	13712.7	100898373002327	584974510494806	6365669975039444	8181177562701067	4521607382412503	313470250263296	3966770361399134	229979877906579	-1034230864661019	916534083880749	-2978554788612735
ENSG00000236330	RPL5P9	-37438692585113	8785819469428472	9396380345262524	442603169436953	-517308066600939											-146595212116779	1733060131831876	-2025575160796092
ENSG00000015133	CCDC88C	-902268943513414	2227644489538	16346432494443	-424143388164687	-1376271260510893	-644446037117478	23617427567198	1021082764520513	-86487901037344	-1198403784096331	152740942607115	1606169760411319	2504193708610193	36598210989471	-60639255780745	-3532930720271098	-166077888042105	-5388937578580053	600493571974739	1438840828780435	-238400278825916	-2250143470481896	-301980576473601	-4184338632675288
ENSG00000105697	HAMP	-65088128255999	7905534261296584	8924188958807414	415003848263391	-544880238429517	16890219764016	9527638596797196	9776710404879484	575105288850703	-541430130697851	-8031651964694	9411942802290628	9578405899439104	205332303422225	-221388294910531	-254859539933999	1624992032698354	-2133536953760463	-31576048273728	807253943960336	-870377292002054	5897377829647	2008033777871016	-1890453821023097
ENSG00000139910	NOVA1	1075676048801078	1.05161e+10	108521785567	1547648119393941	598805254476181	1519349644580676	7.86735e+07	1.4506e+10	2060144666024964	969302027605357	168519704880565	12163162010168	1976653697420586	38174288429219	-44856860337031	4211924820409894	6059982031394564	2344686131787711	662527006869117	1500803545217082	-176352560299709	5304951051330591	7193187329134182	3384408472890436
ENSG00000144468	RHBDD1	-9639547457139	694062289559819	8330463649651044	383744399307712	-576091268993438	-95094817975111	7387414375732051	8621237940015498	463420502536809	-653017438138635	-245924399318271	238700410719586	476564506709028	-32581058037397	-459043973216408	-377446808799877	1502592311076302	-2255747087981887	-966839790705152	-128090841824367	-1804709009026091	-33203243005489	1618075925386676	-2280071316926427
ENSG00000232411	nan	-167527241231994	494196828636719	7511303527416385	312686509816224	-646969364036624											-655970862441614	1224357531405672	-2533277863226446
ENSG00000277423	nan	-23179077564623	3441597772573687	6287360355239587	248447954733196	-710962154213327											-907601616838602	972824586256394	-2783848489552979
ENSG00000196345	ZKSCAN7	-548102881715	251724991678322	938608231609423	-6832028107397	-1025367789571021	-919657859268116	12185409027526	89653999753247	-363253566473759	-1470377989862915	218294008560144	449311103138736	837951925353228	43145349451619	4935870719921	-2146155558828952	-267515380595825	-4014937441208818	858212256016673	1696238386648152	19405135183923	-3211071226949417	-1268333721759218	-5133961949442799
ENSG00000213085	CFAP45	109083704529127	6562277658617847	8137949786010973	588737794504288	-371072904597775	1040694974492498	249160554799	22409735725923	1589728141366405	485244891900001	271125678106358	12744241191352	270715513041407	48420601380304	57798676454661	427128932656428	2305265913608306	-1452975715875579	1065917390067072	1903632345311278	227232679642078	3633683608470603	5550684139725502	1694277817235519
ENSG00000118004	COLEC11	167437051121215	4944293662313908	7512674217989167	646879526181834	-312776637001057	331143708763841	2453205061100219	4907913969772703	887771805852069	-227546247428023	-41862433753067	7006085836887352	7728394299276575	171513322188866	-255200076562491	655617713399605	2532926093480503	-1224710434054397	-164580118119319	674296267421679	-1003306663737315	1156219157462652	3099738096227603	-794498954750322
ENSG00000132612	VPS4A	-98627407676916	6873481822096854	8286782376614342	381515521946832	-578315977636756	181314545009398	5247996325706608	7200629192838887	738835975357981	-377336701481948	346356211255747	14602205065891	37351281854759	559303330032948	133094129366697	-386186182010926	1493864902960816	-2264458173037109	1361682564756627	2198873784174269	523253083214592	633076651974074	2579714747172577	-1317506301707622
ENSG00000173838	MARCHF10	799008755418692	10858890965895	66135859722403	1274085044336057	320274659914743											3128604390163525	4988816500593539	1254069746134792
ENSG00000176681	LRRC37A	46514243609631	8494658538288468	9246409629996902	526359063443678	-433544875592212	-295839162130163	2993394747477659	5537174332479929	262864276483073	-852700157714263						18213150453648	2061015308686225	-169759141174858				-1032950038699163	917815148646048	-2977282164293714
ENSG00000149294	NCAM1	477451476952454	512124749533851	1652573248526684	955224825877704	-2516620042895	2783931927882289	1.1449e-08	8.86617e-08	3291052227337709	2260799609957259	3332621905638625	2.95393e-207	3.50209e-205	352094666291482	3141599803790427	1869512413666552	3740285151528967	-9854095416575	10	10	10	9720358088955836	10	7893792788558954
ENSG00000089356	FXYD3	1504377772265151	619168	1.28961e+08	1970114992096298	1031865975505755	331877053331668	2442759488854832	489301538999462	888500166365943	-226812474933108	-1161655084412558	8.3868e-12	9.73408e-12	-950650847552603	-13716159540523	5890552351090131	7714196335895699	4040381784472435	-4566990350686895	-3737437476839852	-539244127715655	1158779698448038	3102281234923562	-791936919617579
ENSG00000244607	CCDC13	18224459690161	9407208188371	9696245166448728	49814321677431	-461778262245409	138509376181098	6271073929070072	7923586652906165	696240302101226	-420084754028974	-175059274455616	1078256626011189	1785805672087723	38315473387876	-388274687788585	71359824542996	1950533137917386	-1808142262203391	-688237005945139	150635416305968	-1526483012333351	483618410950991	2430987979485129	-1466765115905238
ENSG00000261147	nan	-84762299117405	7294360134532187	8554706720617496	395360874343822	-564494977200606	214201874951379	4524420789270999	6625666213518973	771548536670929	-34447935893185	208447507125256	555154916994723	1008516208217995	421620430489895	-4915115582487	-331895863894639	1548077863706016	-2210340565003725	819501215498222	1657580174646709	-1932353737261	747905833113165	2693933707336112	-120278182434535
ENSG00000115204	MPV17	-178194560589549	4671099426945208	7302954436407703	302026082221676	-657594471834041	148644357577489	6021199697248935	7752257798009502	706327519146624	-409965143618462	275555042861466	113559443660071	244042283729337	488628202646077	62231193426358	-697739894316408	1182615484967337	-2574881611214839	1083331221735084	1921017965230704	244658904095986	519005644170004	246620843901586	-1431431551917656
ENSG00000205593	DENND6B	227382105779968	3534183313163834	6388761626289197	706573318023563	-252856178360047	201120987530346	4805279355606406	6856324207034435	758538600313447	-357549765613809	144497517959927	1844197644428255	2801494597585978	357747660901601	-6888415579925	890338997618439	2766663531218188	-990085458178332	568084949720604	140646749387288	-270814701430481	702232694132902	264850830061453	-1248418368847201
ENSG00000011304	PTBP1	-158760535311267	5170706807302834	7692305899625691	321446734072301	-638236534907213	-576227007066501	430579497677798	1615999445449205	-18015664190337	-1130858447701713	-337248382061264	19435600367027	48589000917569	-123977153657994	-550212910556084	-621643886116446	1258659128078437	-2499083535107342	-132587557815187	-487410137534938	-2163135243025862	-201195036168661	-6290337252379	-3948497788142099
ENSG00000075643	MOCOS	-138963644335297	5706669794248705	7892248580211404	341226274367105	-618513442420294	181875620458821	5235174210275442	7195569149494162	739394169776722	-376776238899887	-44657493598173	681680120715363	7582569946752022	168719018927165	-257993348361784	-54412703839861	1336108037345161	-2421855653280388	-175568759682099	663310600329682	-1014288275685123	635035699258488	2581663735069543	-1315549394306787
ENSG00000135899	SP110	-404886613720084	983268586841356	2722892627557968	7522189517237	-883132748942101	16629781666556	5597029641772181	7448685900401111	723895057423195	-392335721197031	178837268911643	1004337727238852	1682149042540468	392048112643089	-34536345789051	-1585376916851572	294539390058843	-3458000900114796	703090007027082	1541318048249607	-135777960328339	580644343782646	2527547138098063	-1369876778569397
ENSG00000177556	ATOX1	843992439314813	5562956504227	36921230887996	131861327025945	365510736998974						-93620371104393	0.0646151	0.0524552	-724290035197267	-1147272484385969	3304742824152755	5163171540091347	143119645269427	-3680639263742432	-2847510974840985	-4510445859623579
ENSG00000100181	TPTEP1	824667000846623	7444456452784	47576041134603	1299485847612551	346074465114555											3229071999242043	5088276067344939	135509164766727
ENSG00000234981	nan	-87220067244841	7219114289524855	850459435576862	392906742678946	-566945060678973											-341519518330654	1538468448228776	-2219934129372953
ENSG00000260814	nan	138672606705768	5714742119133863	7892248580211404	618223461778484	-341517028866847											542987449377499	242072020300794	-1337246517741256
ENSG00000213420	GPC2	-664652946433502	66059651987985	310774732386464	-185281680574169	-11409754690513	92228351720626	7463419697753317	8671641897832089	650162891617924	-466281025691404	-302966024546195	53771699463329	123585359227128	-89663547189774	-515992918490118	-2602519824776291	-725490271952607	-4467611696785765	-119109616034448	-352507865991164	-2028601011942218	322023895663499	2270104401397712	-1628063708890264
ENSG00000101144	BMP7	-264526692058592	2803036487384674	557171980383098	215709508817015	-743544996100445	-877949683597588	20216275407918	138262229516942	-321254960656914	-1429213941116523	-1123043555229782	3.82549e-09	4.18435e-09	-911868073518009	-1333209447966788	-1035782604980682	844633693571091	-291143009799058	-4415191005451663	-3584964890815378	-5241447970236337	-3065443239894789	-1121691670749306	-4990233832315116
ENSG00000147475	ERLIN2	-694865019850826	4512308433103	224541558973522	-21562180811902	-1170922218413207	273079428912386	3380805311824665	5929256667329531	830083248990709	-285625309626034	249318692412009	219975894995263	443228976401792	462433139019516	35977393757847	-2720818435258791	-844290292091562	-4584871402501622	980184288581081	1818033349208788	141443370187666	953482306507096	2898313117149875	-997287419648188
ENSG00000170473	PYM1	259006307558782	2904675848022104	5685540646991917	738051141984659	-22123104192655	-126727721760408	6566991292178467	81173346545641	431847099711576	-684512738783632	-650495318140075	2.18932e+06	1.05208e+06	-437742423960775	-862658471484997	1014166948000245	2889918323571337	-866253848055972	-2557390641142885	-1720963006266285	-3391499738670361	-442481665220088	150783444337545	-2390040097887811
ENSG00000137076	TLN1	768442845873087	16792433487172	96519519619226	1243817682427323	289548438962662	428153025942081	1329656356995086	3477106167073344	984070152758643	-130428026681675	180895829621201	965793895467643	1626227162657126	394104157865427	-3247714199788	3008920296409621	487030140209914	113375793589256	711183138132007	154940128983912	-127682300979392	1494936240123108	3435972759845417	-455401625120258
ENSG00000154957	ZNF18	-13086439194015	9574144198476314	9784509458599092	4669052170536	-493017802697436	1071333728207587	1620823433524	15212699810541	1619914435213128	516151495326779	-201964196004673	635609677736755	1136556833406193	11401153622775	-415145741588364	-51241354786593	1828217403072994	-1930464029946334	-794012393794165	4482307982859	-1632125250776647	3740661675903646	5656082401310079	1802191106929409
ENSG00000145241	CENPC	-206303604089931	3998275988154677	6793121477236788	273929965710808	-6855870797009	132390985461516	6424039793564498	8031201724731016	690150194117096	-4261933106963	593339361881894	4.86721e+08	2.08738e+08	805679847045259	380460569756242	-807803865833854	1072602130462372	-2684489666533944	2332684784630066	3167491053559421	1495762188113065	462255478859573	2409723799203543	-1488093711485611
ENSG00000277855	nan	51643736031018	8330971058052368	9159668596470698	531474329175605	-428424787767211											20221658170244	2081044679725312	-1677543159287408
ENSG00000078061	ARAF	-85526692164135	7270929552008218	854289368369953	394597618483139	-565256986427244	55830412981649	499856775557043	1797171551400795	1113104059394111	3494128428	667410030253696	829727	4.13342e+06	879518043011458	454697077132509	-334888926768595	1545089253605868	-2213324293774701	2623890007472968	3457782322469321	1787619398919797	194937096342272	3886506684741973	122000754346
ENSG00000275718	CCL15	196138099959183	4234601833323051	6981598383547313	675464555001941	-284091670754073	346306303915749	2243550168841938	4659267180662122	902830140189864	-21237357998841	88323410717876	4172213656795221	5366010502168735	301627006685608	-12506059333969	767999745245691	2644853836515903	-1112391375316449	347239184763933	1185831876883103	-4916696278417	1209160773224976	3152315675629099	-741522170655652
ENSG00000258323	nan	124307866352604	6119744616337209	7900314080324551	60390988497629	-355866784719693											486740769441034	2364673859437122	-1393434524261239
ENSG00000147852	VLDLR	1299824404098046	9.60546e+07	1.42671e+10	1768752077943565	825009031183021	-485778024200043	881885648804345	2653519185307873	72688400514579	-1041223575817442	-550473434179659	4.16871e+08	1.6478e+10	-337509399709091	-762937806167647	5089601721537907	6925738270872068	323041125567042	-2164159478955234	-1326901756313512	-2999452802897924	-1696139298406554	253798332796384	-3635529269319308
ENSG00000198440	ZNF583	-150847957899424	5381764355241132	7855442827436683	329352827893527	-630353903184531	225405956146879	4291405711889476	6451054362442354	782690337785841	-333282735036176	-20005009506559	8542161281893915	8945241510738989	193363680529101	-233355485983768	-59066134148184	128961628551931	-2468218246027121	-78648719923656	760199886351189	-917425720481096	78702592803619	2732836345546542	-1163687767280492
ENSG00000161270	NPHS1	-79953894291908	7442321030637521	8646774992546814	400161997244861	-559701439603627	99792948333086	7263394340603274	8544692569958046	65769583461468	-458731914798406	-263874564967606	153425783298993	320248902514086	-5054258390362	-476966467711612	-313068039612725	1566877174832505	-2191570954947996	-1037409992147692	-198705705405958	-1875170422674729	348436390572291	2296406374753742	-1601705283815913
ENSG00000269437	NXF2B	597828977331134	145932715727948	597633180953189	1074707590867096	118205821724372						-230984151199194	33844983273778	651998442015504	-17632404218632	-444125709998309	2340863414024863	4208132719605745	462847559906858	-908102933343402	-69320937863948	-1746058584231094
ENSG00000272779	BMS1P20	-136558742040351	5773535226052331	7892248580211404	343628812712052	-616117249931815											-534710385793922	1345515433650347	-2412473104856118
ENSG00000186376	ZNF75D	94266374963837	7004894901857963	8371577062125671	57396901658961	-38587053943621	-942676574024396	9133537439434	70042182881466	-386440989489996	-1493088234997826						369110091168047	2247437181309873	-1510917440550805				-3291443217348183	-1349294772789432	-5213256889375913
ENSG00000186009	ATP4B	25280302055878	9178399504513064	9584716356123828	505181335351358	-454737203845173											98987731311197	1978091645292071	-1780572243636032
ENSG00000255150	EID3	529317495208173	306282425978105	1100464109805904	1006722222594624	49480872640505											2072599365235829	39419287259678	193747658360871
ENSG00000271855	nan	344149542278958	1600698268495812	386352556411457	822752858787876	-136037492782142											1347554406062178	3221576970923793	-532669378475113
ENSG00000183535	COL18A1-AS1	425595587525623	822694340387137	2371619329262183	903711906512542	-54478024594379											1666465122612021	3538580796497796	-213314542246908
ENSG00000118260	CREB1	-56248279983018	215843880986282	827452770523597	-82743853931008	-1039638412178174	-84615483902874	7666458845818309	8790501256596548	473877664941638	-642581237359538	315096087383264	37910603543048	89626714612949	528101486566925	101804092559104	-2202461668918783	-323992425504709	-4070815593026705	1238784911225413	2076205257220736	400237828436811	-295442857337347	1654588083658674	-2243632348126558
ENSG00000262202	nan	-682277393369106	5298141054472	257428963032861	-202979756053981	-1158446189145145											-2671530235091558	-794788982721515	-4536020173181345
ENSG00000137831	UACA	-1268176853187816	1.96379e+08	2.77703e+09	-793041585910407	-1737563034540056	-48601902084895	880306799132521	265066677556115	72446846253432	-1041462523258536	1312595087352094	7.70604e-19	1.10673e-17	1521693931047313	1102321767332585	-4965682345130341	-3105239298612448	-6803614229733012	5160403616127994	5982465529607903	4333724306217668	-1696980760693097	252954923554676	-3636363576605565
ENSG00000169184	MN1	-43441295384158	761106667971436	2233236281757605	45644545823464	-912472761163022	-826269116532988	36788758587442	229002504068152	-269241779403034	-1378181130691601	-569237353979262	1.65905e+08	6.80139e+08	-356309665059276	-781648457322373	-1700990465142626	178726109672576	-3572884861547388	-2237928915180949	-1400814083300026	-3073012816042372	-2884995717785172	-940082795162297	-4812048012953725
ENSG00000131043	AAR2	-91111858886612	7100515428876968	8434460983087254	389020590770471	-570824565760414	-655668633574242	212888296518305	94451553302468	-97757166141437	-120951064228048	-83788082310295	4415417888955201	5605746514905392	129595522298426	-297095407117721	-356758245482857	1523251804056553	-2235124747181763	-3294087621604	509498480031566	-11680161140311	-2289328213167245	-341328267095651	-4223119264382509
ENSG00000197965	MPZL1	-440388465930336	721544648301915	2143662110822388	39657688416764	-918409554750927	-2758934939967903	2.98155e-08	2.24057e-05	-2235091157349143	-3266886711637386	-2108177544501622	4.94925e-71	1.92574e-68	-1903378536428897	-2311142423752152	-1724388222961388	15528392804583	-3596131012927646	-8288197273412301	-7483039954128181	-9086143804618892	-9633078773237092	-7804029327476798	-10
ENSG00000254635	WAC-AS1	-161767061372341	5091649147661177	7637789700012639	318442514010073	-641231525718576											-63341626103728	1246895782543157	-2510810742522009
ENSG00000273391	nan	-343644542869007	1606843336442525	3873148845770863	13654299622283	-822250681844759											-1345577026765283	534648731358362	-3219610643298195
ENSG00000155975	VPS37A	929201971698209	1432298807956	10954339285138	1402907587119153	451252144842069	626790518305745	277271865833942	1157156699849545	1180927538872716	68761830823115	-446522964908111	4.06173e+10	1290245023858	-233384874722581	-659255326888024	3638389877818367	5493234969314856	1766926121709149	-1755483275077895	-917541260875468	-2591830188613249	2188497579151899	412331869180584	240088348338788
ENSG00000185883	ATP6V0C	32016333146095	8960591414477799	9468151311268668	511900001288193	-448014841595208						-158363225254599	1457657900558016	230668519334922	55015800466995	-371598104763342	125363382764588	2004399301626837	-1754250113991171	-622597302199343	216291938321038	-1460919838908919
ENSG00000122484	RPAP2	-1029211873185015	2.50263e+09	2285802212517	-551976211499077	-1501755785913475	276265555419354	3324716659471538	5869187240988123	83324972699177	-282439349859733	-240211469795263	273342141020884	538604452998765	-26864801705384	-453339562643764	-4029989362466671	-2161321996599292	-5880285682602244	-944379686707135	-10561765863888	-1782282396866256	964606964496848	2909369170547893	-986163343849033
ENSG00000130985	UBA1	22617714915874	9264673058987532	9626267062495872	502525492442469	-45739426815124	-37221101176497	191553298525733	4324145360494437	186445708632231	-928550836463841	-945762726910763	0.0296845	0.244693	-733883180924134	-115678889843447	88562086086516	1967692407826919	-1790976263612699	-3718220068760787	-2885225959740733	-4547859177669377	-129960947779361	650992588541137	-324212188661304
ENSG00000157927	RADIL	1053578809980875	1.59545e+10	1520413248862	1525825374541903	576531875707864	-53145187611753	8521396134314388	9270061651829152	505274021226204	-611233136295188	498524015631317	4.5917e+09	1.62844e+10	711128058863106	285467216960824	412540071424143	5974532735768601	2257472330780217	1959922871706147	2795765306336912	1122300451133317	-185561381410623	1764211391153326	-2134177528235881
ENSG00000189057	FAM111B	-18636600950849	4469297213853634	7163062017294611	293859173537696	-665732850308101	-205112393287438	4718588459558913	6779632286705872	353561760481097	-762508557795023						-729736078073367	1150637078986823	-2606748304101595				-716169059763353	1234493876814078	-2662369777589723
ENSG00000261420	MPC1-DT	-206828542322952	3986291347539406	6785892394513038	273405196708206	-686109771717425											-809859317728788	1070547341207276	-2686536323127521
ENSG00000083812	ZNF324	480351387366529	498142948666653	1615495359950869	958104801216855	38995647241						638842440531404	4.21257e+06	1.97335e+08	851042874324155	426062743086511	1880867323598423	3751562003539067	1526916348904	2511577920731604	3345833584522844	1675044910122592
ENSG00000182938	OTOP3	-235865834395433	3357406701046776	6193975340110023	244373142353407	-715018715134309	619926191250065	294837899773814	1212524180077912	1174131985093449	61871020602849	-627670705430098	7.80577e+06	3.5741e+08	-414865857446923	-839906338793304	-923557945985771	956869221795062	-2799732388471834	-2467656788639374	-1631024899914827	-3302050837826393	2164530140741264	409959138170689	216028441487914
ENSG00000274044	FAM230J	143886955332591	5570943890363919	7892248580211404	623418750300097	-336307629728054											563404790107605	2441062911853936	-1316848557261835
ENSG00000254560	BBOX1-AS1	128793597533941	5991913441868337	7892248580211404	608379850929058	-35138594540714											504305130496966	2382176490051455	-1375889317841661
ENSG00000243538	RPS26P28	-76233461094743	755745751346878	8718356407939644	403876644037309	-555992357937688											-298500284810262	1581422272347325	-2177047648282287
ENSG00000160867	FGFR4	-1672184210160817	5660.8	1.52778e+06	-1201867896842921	-2135011250881922	-2054324598057209	269.549	9204.56	-1513412114902254	-2582970674003557	-139215223643433	6.62499e-23	1.05149e-20	-1182303598549061	-1600757938518307	-6547616437982365	-4706042522010892	-8359865304676782	-5473178670498344	-4648168977701745	-629330182176709	-7172866018766628	-5284219612440141	-901868311977195
ENSG00000178104	PDE4DIP	3685247300421285	4.29398e-41	1.20103e-38	4092816711809092	3263000262633565	-178837359899263	5304798088856646	7243760450683208	379811138729003	-736371468428529	672393382456751	620588	3.12505e+06	884484918151489	459692430344062	10	10	10	2643481813793805	3477309350019895	180725838662067	-624427329021174	1326146030240181	-2571109691270506
ENSG00000138119	MYOF	-597852411573027	145893924233138	597587950971683	-118229336737066	-1074730837525175	-256133683415068	3689232693157863	599261900913345	302568261134986	-813240116031789	-464855502818656	1.93146e+09	6.38339e+09	-251744750989311	-677543939463023	-2340955173309814	-462939635458534	-4208223744386174	-1827556754430331	-989722219642901	-2663730977649703	-894314654931814	1056445315752389	-2839503746826967
ENSG00000255306	nan	-343816377757548	1604750374182862	3868969977474118	136370990104513	-822421556612346											-1346249864682298	533975222972813	-3220279721758744
ENSG00000147255	IGSF1	3180514155899201	3.33236e-27	5.83488e-23	3605438494308683	2742415539195978	51636458796265	8562909121718973	9292472579000396	609729989068673	-506778928055183	886535369399711	0.323956	24.0348	1097819263724181	674450666711874	10	10	10	3485370599172796	4316022932712371	2651569926580328	180293513975077	212892914943904	-1769465913766355
ENSG00000214944	ARHGEF28	44887745536666	668249239120444	2025057529609824	926842955274768	-31151989751031	-309032185786863	2782925373982295	5300202598468156	2496678465632	-865807764127349	-262535304318309	158704771354554	330214344638185	-49202428147779	-475629318970429	1757627770636455	3629152896259913	-121978953592733	-1032144754174334	-193436948364845	-1869913487565196	-107901471180945	871738582250061	-3023048595127822
ENSG00000163964	PIGX	699616239706776	4244241364211	212973500142155	1175630925142189	220393969442617						-612046104874863	1.81744e+07	8.09302e+07	-399206978256016	-824330078438566	2739422345665464	4603308848204661	862976201058543	-2406229433027032	-1569462779516922	-3240813529356428
ENSG00000235872	nan	274043551385979	2633540879898963	5356188547302637	753015435746085	-20618998143644											1073046887343432	2948512619115898	-80735896416022
ENSG00000112852	PCDHB2	197040055442647	4213308933495994	6964510952523801	676362736941037	-283190092477836						17924101988616	869236058605353	9051841240763866	231275694062661	-195443809094759	771531448579553	2648370764132483	-1108861148977899	70467733430644	909249119902676	-768377810431255
ENSG00000177576	C18orf32	447610026559508	675994488007518	203991779294072	925583869589624	-3242195740208						969764556936091	0.000406645	0.00351094	1180682051649333	757972436338875	1752665017345726	3624222811357315	-126951647998761	3812582093767489	4641793945092139	2979931693405203
ENSG00000168546	GFRA2	149438666081473	5419803355742452	7885314116910437	628949882157512	-330760901886037	171015576777369	548617341079263	7375485880630708	728589270033572	-387623795742809	257865357958415	178382224078156	366750696967019	470966676999215	44529420536119	585143108372677	2462720651264581	-1295129750102477	1013785087651936	1851582537890912	175065246680321	597116843417169	2543937419434168	-1353424651186259
ENSG00000131480	AOC2	-114398236964263	6406317861344784	8031910463127514	365764922953674	-594034401361085						-33031986922215	761590908411798	8218389369025297	180341159753311	-246375059836992	-447938553821994	1432191745034184	-2326005345251282	-129863646758847	709002480578435	-968611540571401
ENSG00000130182	ZSCAN10	116721366258549	6338633030837854	7989715993770792	596349610062418	-363444572087807	-268218705928008	3467535225399916	599261900913345	290485559557796	-82525228488434	-33360927860016	7592897652360213	8201573745196477	180012321977964	-246703804461708	457035015481181	2335070792980124	-1423106162609161	-131156862024756	707709670890686	-969903984041983	-936510638663438	1014257435784498	-2881445355205523
ENSG00000260806	PAPOLA-DT	-79413235601803	7459018104697115	8660682321046834	40070182328802	-559162438757398											-310951032583739	1568990921543162	-2189460439384333
ENSG00000171303	KCNK3	327277437265759	1815775715425793	4206794490439469	805973736879981	-152925108722611	-1351035353790833	1.86606e+08	2.65609e+11	-798790869046269	-1895011685572171	520597437352968	1.70227e+09	6.32268e+09	733143535665879	307578643275879	1281489871152377	3155876521325314	-598794648082529	2046703453448619	2882318080454782	1209230446082589	-4717265999990107	-2789052852748584	-6616610119676797
ENSG00000280184	nan	41671921573041	888709903193419	2520882923742294	89489167707244	-63369859966943											1631708737805355	3504044243097837	-248131476347508
ENSG00000160185	UBASH3A	926079397979884	1508468967675	11462670873841	1399819763882276	448108836650078	424907036057727	13593408872923	3521277080189657	980849635040918	-133679365616238						3626163105861855	5481144266591731	1754618161699441				1483602563565488	3424728021734335	-466753978385791
ENSG00000205181	LINC00654	-123830647392042	6133414722791973	7907533845242187	356343471892092	-60343433189439											-484872167470207	1395301043958536	-2362811780392684
ENSG00000130224	LRCH2	1921972259245836	2.00138	7.65608	2379979886775762	1455435951673737	496165977578258	815869690309731	2543469306103413	1051522618019786	-62275820290325	1273903250016465	5.95306e-17	8.13938e-16	1483232253275222	1063433230689541	7525688307255265	931906624523247	5698915408783214	5008288543303668	5831255317890718	4180835919652452	1732409806904382	3671489336150471	-217441837367733
ENSG00000253626	EIF5AL1	-161990457699061	5085800207029237	7635222558256473	318219285564624	-641454061485135	11008897791543	1058906464548	10476707744745	1649024289343132	545976011867367	867835143570674	1.33884	9.63755	1079197320362205	655688791249468	-63429099328994	1246021707647601	-2511682105159155	3411851572688212	4242811669931914	2577808527566672	3843859385596216	5757722173183435	1906326189292946
ENSG00000099953	MMP11	-95545711502771	9.20612e+10	7359768349145	-477685371012699	-1428866898235409	-6422770282055	240920755250952	1035744254025722	-84310035820352	-1196256984190747	-686961944434099	262341	1.36262e+07	-474296686724556	-899004705474955	-3741194704584009	-187042825091959	-559488143335314	-2700757405203606	-1864674308836861	-353439318625501	-2242570173480126	-294376356856512	-4176842880491617
ENSG00000213928	IRF9	853297726206224	4824445272957	32602471868112	1327821951190885	374870682010432	120985986032875	6713215453487644	8209098155297532	678796805364711	-437578864254069	-701822761530877	1.07014e+06	570773	-489194851087551	-913814840859743	3341178671973903	5199229116925541	1467846320240705	-2759181983372288	-1923245715962542	-3592618511742994	422433859178283	2370082383014084	-1527847434094298
ENSG00000175093	SPSB4	352733165670416	1498944755321387	3694480435759511	831288136168539	-127444926788232	-564705152151741	474113688020365	1735479442849743	-6456208397438	-1119445313736904	-203638357409974	3.08389e-65	1.10501e-62	-1830978440028839	-2240011526130007	1381164503127952	3254997764004355	-499024265691299	-800594277768244	-7198402503576261	-8806496147207475	-1971720730172	-225424540347	-3908647765968762
ENSG00000267060	PTGES3L	216069435849728	3778872108499797	6602818529950647	695310692516929	-264166848823379	257302488245475	3667414473977887	599261900913345	814401945507334	-301399752092182	29725192516181	63143408081644	143334400380654	510288727599708	83944727682528	846043026431398	2722563514333694	-1034373600238465	1168631457093473	2006175263452379	330024605807165	898395646055867	2843560382848665	-105236535739835
ENSG00000273059	nan	-130379363362324	5947014308983974	7892248580211404	349801862730497	-609959997519343											-510514366501959	1369686672397644	-2388363723327613
ENSG00000228300	FAM174C	953135615697945	9.57741e+09	7631098638404	1426571819081145	47534785574641						652420954944061	196275	9.46545e+06	864577892166701	439672545995824	3732104625225543	558589480502259	1861275459445666	2564961188391149	3399045847536819	1728551186981884
ENSG00000254505	CHMP4A	72681519630284	7667887959453699	8788893186948074	552451130356083	-407422937323243											284592277439946	2163181592268205	-1595308163669463
ENSG00000065559	MAP2K4	248649590592715	3101967887061127	5917367793058946	727743413809722	-231589123451657	-192926439495038	4985943194270432	7007744079802388	365736774399371	-750387532733134	149791191245057	1688524244398217	2610289732851536	363035603567635	-63589568409015	973614113068244	2849557309499819	-906812026065098	588896768252009	1427256782754592	-249999289139405	-673620665051812	1277004073934332	-2620048087599123
ENSG00000156113	KCNMA1	2467227170744109	8.72233e-10	6.7573e-08	2912698026747452	2011079564383971	-979090815238434	5713972002432	4658661327465	-42313435470246	-1529002640183588	-172992651012505	1120476960476108	1843974800336356	40382690889983	-386210538260316	9660692333560098	10	787459750776174	-68011217659619	158762581168908	-1518367909060035	-3418586938282235	-1477413081208454	-5338655386178605
ENSG00000246334	PRR7-AS1	-215807144306582	3784666303715527	6607065938776909	264429079423339	-695049546793744											-845015995791466	1035400392248823	-2721540970274586
ENSG00000137285	TUBB2B	281957502852038	2.8846e-17	3.37639e-15	3255481262589534	2371708791746937	150571012299521	1.03091e+08	1.87063e+09	2046774404010577	955472447960558	-312014129459412	41476480690413	97366382909788	-987194116868	-52502504929841	10	10	928667988645586	-1226668343848124	-388110555920387	-2064110394030854	5257327389040247	7146503811760297	3336121205152018
ENSG00000140598	EFL1	-51024634006391	8350690426750392	9169878127819466	429042768088994	-530856957597525	28415240673533	9206171398203986	9627623121325262	586591485014002	-529938122738453	-238416271064106	285087445224619	559625482819524	-25068586365895	-451547012159011	-199792421392467	1679962927449713	-2078627295164199	-937321950385251	-98555925570884	-1775235071996047	99214464177186	2048138903527658	-1850328402938089
ENSG00000104412	EMC2	8744638324285	9715359303650892	9857001901284774	488686457620697	-471237469910343	900621415760038	15392330502665	109238207621431	1451592262838722	344082126384593	771711051086453	1228.67	748.686	983452208125277	559271469403379	34240568286906	1913504184224371	-1845180803304826	3033944387728943	3866394427345138	2198748525661857	3144603708190991	5068369830681679	120139484984168
ENSG00000254777	nan	-8400329928863	7317650397143582	8571540487716115	396118739466461	-563738338842696											-328923918743431	1551045365793772	-2207377866444705
ENSG00000146830	GIGYF1	-605881893653151	133125319946306	553284449186337	-12628680635798	-1082695739129921	1188530062966	6767857600813081	8240301651917059	676673317561636	-43970804615588	275745095982492	112995012105216	242947527852804	488817945997377	62421383676828	-237239547069861	-494489521061966	-4239411170004271	108407840631809	1921763931969129	245406627796718	414986361405286	2362668027211526	-1535281671373896
ENSG00000273274	ZBTB8B	270202078129143	2701087654065417	5440997768937507	749192803754962	-210032636456873	558043389050812	500929728507492	1800115441782127	1112845743655327	-22661437883	42718822968813	6947885794309169	7682423795472676	256055921471694	-170657168327336	1058005187218713	293354469398579	-822405291606921	167946970584586	1006671376287935	-670930340240042	194846056271019	3885604751237118	-79124524859
ENSG00000146856	AGBL3	41320256855005	8661066897580354	9335071452967074	521179225662874	-438729082569236						219095491955426	441500113279444	824952348326781	432253865960967	5737737398863	161793892898597	2040733098871308	-1717890729619427	86136324892464	1699385007976901	2255763495292
ENSG00000174607	UGT8	381000036634502	1198505646232308	3152059604702065	859390835806147	-99143592897231	1529929976196015	6.36847e+07	1.19252e+09	2070514739466404	98003125243127	66871032913268	5390803900970271	6492708182357663	280191492957016	-146510307376449	1491846464989664	3365036895447408	-388207360546785	262900206914515	1101559199326665	-57599813321764	534189326639374	7229395408164422	3421870562491212
ENSG00000247315	ZCCHC3	186992837178493	4454024366148844	7159160248739643	666357114822007	-293232667667802						201538190030861	641217181547857	1145192752203306	414720295895051	-11827332491847	732190488975561	2609192678691466	-1148183928127435	792337572069678	1630452631767637	-46498581282365
ENSG00000134369	NAV1	1082560890753358	9.21987e+09	9.67682e+10	1554446496278221	605745946772568	303848080601894	2864396708760243	5394208458628946	860657452940736	-2548535224572	982428018068958	0.000139636	0.00122659	1193287190359655	770683019805072	4238883156737758	6086601804484534	2371863156121909	3862367874052993	4691350433615772	302990273284767	1060913924838325	3005065803055203	-889844853498327
ENSG00000130023	ERMARD	-243066973352431	3211897800666453	603776232285532	237172048593935	-722186778597899	471915042345953	976610164762146	2855947160009118	1027477392242824	-86582361240495	247388577013617	230460201358244	461887843997433	460505945197715	34046110813036	-951754777124668	92867256763192	-282779970897248	972596133957175	1810456680620866	133850625411915	1647735403737708	3587533186741438	-302310393086783
ENSG00000183734	ASCL2	1681289661597527	4324.04	118181	2143951254613738	1211100375206788	-1753963097323103	511103	1.24082e+08	-1207517616112452	-228981093823863	-301450338062914	56126696179288	128579702763211	-8814659507894	-514479873817245	6583269808669628	8394870847148944	4742193280241505	-1185137312802991	-346544042696631	-2022652550549598	-6124125812862021	-4216160427551815	-7995088548238573
ENSG00000048342	CC2D2A	215405981708713	3793538814597599	6613359677026752	694650135403156	-264830147533008	29304943249076	9181401952904312	9620330861304338	587478128971599	-529050907182909	93247221118074	0.00873515	0.0704918	1143557509625389	720545318652943	843445200657682	271997703218054	-1036970817403936	3665969053886297	4495840617402999	2832788804247091	102320943735946	2051234703636466	-1847230607041715
ENSG00000137054	POLR1E	-704497164468923	39839569494296	202221260475765	-225296634771431	-1180467953323664	-139748955990389	6240274431846111	7904578286416657	418847115712354	-697474101213052	-323836836316761	2925998099831	70805145799335	-110552784886424	-536826358417081	-2758534129529346	-882173112440562	-4622248750303703	-1273148739673893	-434632885950982	-2110506665689836	-487946519517681	1462443786241366	-2435295904207235
ENSG00000228140	EFHD2-AS1	-132537099371141	5886168327222316	7892248580211404	347646378217339	-612110048879031											-518963213031133	1361246641840955	-2396782479789765
ENSG00000213082	PPP1R14BP2	-2241487749814	3603076039608416	6454786946019503	256089063175227	-703354415364717											-877678544447372	1002744165053659	-2754059572974079
ENSG00000255467	nan	-371965306712843	1288926520105657	3318542793008432	108190174427375	-850409406393549											-1456470011971909	423630219807381	-3329869146283666
ENSG00000172572	PDE3A	-957455469492644	8.89743e+10	7144813793952	-479697553961565	-1430842469349714	-1053201660795166	2093402266597	19167845603376	-497859629372289	-160205137434522	401762357077049	2224255451764	6393015384872	614595960976522	188563557383359	-3749019475601466	-1878307168847511	-560261699372013	1579509126814501	2416254068022544	741328436139443	-3677351870668612	-173832335017428	-559371185752564
ENSG00000147854	UHRF2	-460955914228068	598037943233622	186045606454	19048559025797	-938841138190839	188004868257026	5096156609190272	7087647494030913	745491717376555	-370653457212097	130554247206527	2304584025230472	3357011363543851	343818912803098	-82829261713495	-1804922270432529	74586673788284	-3676133066991002	51326766028396	1351707299546196	-32563920571255	65643653985297	2602953891463531	-1294171130740159
ENSG00000153071	DAB2	-2280996231268706	2.69003e-06	0.00162739	-1820969737171856	-2731059137004808	-43752308326704	1246774989638694	3332355531940447	121041865833485	-993366027518788	-110169012854185	311577269083625	4267873786624449	103215685461233	-323453419572674	-8931485136673112	-7130202110345376	-10	-433124104909503	40578743713704	-1271641355430469	-1527652669573281	422628968716138	-3468430173948725
ENSG00000262294	nan	-336669342626167	1693551363766855	4011656939058624	143524907206051	-815314217719966											-1318264882869459	561987151877158	-3192450174822893
ENSG00000144524	COPS7B	-492598937422198	442569350519331	1475939315908151	-12666554881856	-970267274791052	814430748363488	42010161381594	256404524916515	1366487016304851	25733146422078	-154999646681001	1545188163634753	2424349312603953	58380096816632	-368238304093314	-1928823918082591	-49597252774603	-3799185471944667	-609373556962462	229518505459435	-1447710946315805	284366095070846	4771216921419498	898496818377331
ENSG00000129474	AJUBA	-1105487148646033	5.91551e+09	6.44422e+10	-628861508741147	-1577081606789573	-152121265184042	7.58074e+07	1.40342e+10	-971191159569037	-2061970738694248	-621607321151696	1.08618e+07	491860	-408789046649713	-833861836874158	-4328653375908207	-2462374615684197	-6175232004888963	-2443818888850064	-160713421442117	-327828717311226	-5311455915011225	-3391004553412502	-7199563232245936
ENSG00000138385	SSB	-243140335443936	3210436910802337	6035829682055005	237098684398479	-722259801183881	-1022928604096513	318043899742	27784752923924	-467328075383533	-15722194337825	-451443034839187	3.33609e+10	1072857114708	-238312140553882	-66416374850194	-952042034254202	928385302264141	-2828085636731763	-1774826290230531	-936912566359144	-2611127408974655	-3571650668490865	-1631719580588307	-5489550853496109
ENSG00000257225	nan	-129496999112418	597197850000674	7892248580211404	350683293405527	-609080762936455											-507059374742159	1373138008644991	-2384920986114345
ENSG00000154217	PITPNC1	270107136286886	2702771961839331	5442692823013902	7490983257911	-210127605709718						-238428258745358	285007595215056	559530914589238	-25080580790028	-45155898220176	1057633432262987	2933174755395622	-822777153891741	-93736907936987	-9860308106481	-177528213163575
ENSG00000164924	YWHAZ	229822408731896	3482742315038577	6332889345878562	709002665492422	-250416145489867	201748689896223	72.8306	23566.8	2547068538146127	1475840002132681	-96100238301876	377406078380005	496819690538975	117284246383948	-309397236264225	899894265288479	2776175901520466	-980531248042313	-377813403403922	461097298768285	-1216380155786484	7044243755129318	8893327462473956	5153033074931411
ENSG00000140481	CCDC33	-60143177993458	8061361550718644	9021130383733338	419940373866904	-539949643587426	168423855395736	5546938660966434	7417318733333462	726010515149905	-390212342582798	-175091513426866	1077608112420519	1784898950389917	38283225004942	-388306888023043	-23549705736343	1644321527613854	-2114230681376752	-68836375188943	150508633360099	-1526609605985832	588067606385199	2534933456139723	-136246280400987
ENSG00000163040	CCDC74A	950819531394166	9.96187e+08	7896526652882	1424282042591661	473015845010725	1653093860470027	4.87692e+06	1.05206e+09	2191141734264913	1105022501295794	30150213686504	56044702697521	12840851791851	514531582496523	88198436972042	3723035748981509	557692893984413	1852144221551096	1185340957269116	2022855840702138	346747856572828	5771931460495997	7650575815951209	3858289170568737
ENSG00000154654	NCAM2	95833878976498	8.76412e+10	7050906154923	1431715706815822	480586999111728	2407626280357777	0.00712062	0.349829	2926559578357062	1874552920557801	110164979498192	3115949857397903	4267873786624449	323449389947344	-103219718877044	3752478210769522	5606036248580096	1881789886630936	433108247966984	127162551315487	-405803294314731	8406451808346048	10	6545176432665363
ENSG00000205930	C21orf62-AS1	2406730845824	921769174382249	9602932669990084	503971422637042	-455947689830771											9423812491568	1973354102425297	-1785312031207933
ENSG00000276509	nan	-458795669628579	61012627198792	188709457246905	21213373144068	-936695352953173											-17964636012478	83063235413397	-3667731014986713
ENSG00000268043	NBPF12	-216700863831459	3764945846245222	6594472892858112	263535564842615	-695939359413189											-848515450347054	1031901740174024	-2725025126923356
ENSG00000156521	TYSND1	498742034747468	416723511173479	1405634183264404	976367162467528	18824767042317	856340534722909	26066675094999	171760367045068	1407879203360447	299503067491919	370398978097785	6650734788993	17916940426472	583298442896454	157162744701138	1952877873850535	3823070235703141	73710392299189	1456205530863153	229320940098663	617877671409265	2989992880295222	4915741604740867	1045742906140934
ENSG00000269837	IPO5P1	-13184102928683	5905765412901685	7892248580211404	348341726866613	-611416462669915											-516237676036866	1363969353979038	-2394066668674954
ENSG00000277459	nan	-353005310048016	1495801184190242	3689311738880582	127172487285776	-831558736249785											-1382230113596853	497957499629404	-3256057327615422
ENSG00000274641	H2BC17	-7765890663286	7513278524592836	8688667683837258	402453431183187	-557413469901558											-304081769541497	157584952992949	-2182612164439245
ENSG00000131351	HAUS8	175272063857326	4744480347023519	735750136259516	654683647804065	-304946799493109	1981213043834	994456037207813	9975563436380296	560244313897907	-556294237289506	-483406083154132	8.85331e+09	3.05576e+10	-270324458341697	-6960486172057	686296545235859	2563483967850589	-1194051866378506	-1900487456950006	-1062767433610042	-2736481216362869	6917590205312	1956145297177429	-1942353236125967
ENSG00000104885	DOT1L	145987633094913	5513514240489001	7892248580211404	625511675983617	-334208872205338	683645413678617	163332333512788	768395213982631	1237192862553337	12585645778774	51483127667651	6363095934708745	7311786228233265	264814475957635	-161895092375293	571630218959227	2449257986610427	-1308630647314131	202403407376505	1041105206398089	-636482665657528	2387011751355394	4319774319434164	439439565763733
ENSG00000273149	nan	-10291560866877	6745176614013546	8219002474455996	377233057862355	-582590164613132											-402977092445929	1477096456001319	-2281194210093002
ENSG00000036257	CUL3	-48757467941594	8422990757572544	9207857530142408	431305795094306	-528596097156436	-889359073480763	17638037294131	122633141791265	-332741845511144	-1440476378831837	432634366295269	7.00461e+10	2163981051121	64539905415734	219476521877102	-190915089754421	1688824052156873	-2069774653871387	1700880926497388	2537354927663032	862861249492078	-3105280189257748	-1161799201034594	-5029557684472195
ENSG00000010270	STARD3NL	21768854020908	9292196633773312	9638589746259008	501678767410938	-458241354030228	508345549345563	743627737750802	2380296436726508	1063596426995988	-50065831775848	1170935678852424	3.28324e-12	3.87173e-11	1380846328595285	959973556991612	85238280302639	1964376965245165	-1794293119131333	4603476555434098	542873004482665	3774089254653696	177493591817981	3713646166772262	-174809523181431
ENSG00000120053	GOT1	613577171355105	121824604645123	514861952559268	109032854991304	134009491229753	810886999510996	43698810915754	264730664378257	1362986149758215	25376648599148	719736807771928	354209	195596	931666546060203	507155175561052	2402527155036968	4269298258429028	524728521110242	2829610183121451	3662801620729287	1993855856327196	2831287620930331	4758993319213522	88604936424921
ENSG00000123200	ZC3H13	-164073858417512	14185	361971	-1169989838966847	-210413103552497	-503261989643462	773119354926249	2446935804134058	55162289401077	-1058557210078573	-567736423179101	1.78786e+08	7.31078e+08	-354805771511994	-78015184255413	-6424487720251683	-458122057088132	-8238950512842833	-2232028078888522	-1394901599111684	-3067128948019087	-1757186195143804	192604280519517	-3696051270706517
ENSG00000105976	MET	-91037513489231	1952797212055	1450254950208	-432301729073878	-138428887314556	-476049183915097	947548742070794	2791328305945493	82439206963587	-1031576924933027	380007684806954	4794816120746	13166551651326	592887416693822	166782472973351	-3564671381138112	-1692723738361399	-5420331399883432	1493981693006451	2330907984148873	655697164290531	-1662170144774313	287844183340063	-3601847087647939
ENSG00000168484	SFTPC	38154611750484	8762786384152667	9388041043586984	518022077466964	-441888640268929						-1245466794091687	1.33404e-14	1.74046e-15	-1034856315597245	-1454960914607345	14939847031463	2028370946843393	-1730262316317566	-4896492002696378	-4068487170673393	-5720107927731883
ENSG00000156928	MALSU1	106118350767165	6649959245115906	8176862765384157	585782325304216	-374034485450938	535393020372486	601771925781849	2046364936660664	1090403173760835	-22944857751177	-113453253760373	2973714589327471	4121345380548389	99931372800264	-326734599696419	415517772284098	229369345729712	-1464572103019265	-446035937973512	392875321972607	-1284541155177471	1869374687012188	3807244424382133	-80114111774009
ENSG00000243859	RPL5P17	45343472355251	8532112790560218	9269843775931766	525191504036057	-434713464966744											177547224249825	2056443604729683	-1702167148650917
ENSG00000150527	MIA2	319045052268424	1928184492741939	4376158193504979	797785736049947	-161164067575292	470844492773241	984250489608351	2869840770274764	1026415773988455	-87655213427494	-3070273854704	47894724911422	111309079800062	-93728347828028	-52004715233447	1249255085651582	3123815526787046	-631055174218274	-1207063202886097	-368488431600929	-2044540034716734	1643997480013885	3583826447548972	-306056356603241
ENSG00000249163	PRPF39-DT	-32206786631137	8954443718053674	9466008525985224	447824768261145	-51208995747938											-126109123791058	1753505861486589	-2005143095445936
ENSG00000186416	NKRF	36465020744421	1365943810187383	3452597986812251	843136892995725	-115514293722889	259326203880323	3629827922013055	599261900913345	816413547931251	-299376512484317	-19833834307215	684654569112729	1211259185115309	15028453338997	-411524632644401	1427826957022737	3301392840874432	-45230859363824	-779757529697206	59083631885152	-1617889037439512	905461638023532	2850584080410106	-1045301027523314
ENSG00000219747	RPL32P16	-248543645995264	310403071672968	5919250061976544	23169507668068	-727637965057037											-973199275645685	907226897285501	-2849144413610569
ENSG00000249502	MED28-DT	307134873686014	2099728595229066	4632437487753369	785938626586595	-173082602805762											1202619505318006	3077426900346566	-677723475902688
ENSG00000204262	COL5A2	2422736395344454	6.34762e-09	4.51184e-06	2869333478458345	1965630857485435	-3213080583107064	1.56719e-16	1.96716e-13	-2703302152980862	-3704892837702121	-15854542275351	8842210262226164	91643771580747	197512575782945	-229207225546104	9486483935600552	10	7696638226382521	-62331360278685	776511065843764	-901117036737394	-10	-9438831706495052	-10
ENSG00000137094	DNAJB5	508090811989113	379845432371993	1306408667677359	985649493215099	28197245104798	1512441829509151	9.02434e+07	1.65061e+10	2053373471377356	962297691062012	-621196537885133	1.11065e+07	5.02165e+07	-408377359455289	-833452327204002	1989484012797717	3859416196283489	110409334349735	-2442203914457243	-1605515686280016	-3276677205801644	528083177045486	7169545071216318	3359952178289632
ENSG00000128322	IGLL1	19940716933265	9351500685251088	9667098863186916	499855206767315	-46006564493808	674082185945349	178996171425478	825927597700477	1227731292493316	116250361154791						78080013663591	1957236618163012	-1801436325641317				2353620849400292	4286738364730664	405898983045388
ENSG00000249115	HAUS5	-207334341411056	3974764127466568	6775187575247129	272899558176462	-686613403996567	360011861145864	2065330081511416	4477364368203482	916439266241392	-198656703625352	-370735503540829	6575777126768	17739936307937	-157499649481598	-583634283872943	-811839828251171	1068567459360523	-2688508349277255	-1457528564241791	-619202196134467	-2294529743418366	1257015005130258	3199833209076555	-693628416941536
ENSG00000055483	USP36	784550027151665	13370667800701	79067565190473	1259768642097915	305738970938606	166775592118408	5585753854603575	743868408830464	724370459423495	-391858547935449	393788853865807	2960507770684	8387709666262	606639598310244	180580138686561	3071989690480168	4932759093725541	1197153698549101	1548161687531069	2384974015956287	709942014607782	582312541356474	2529207048540858	-1368210683602564
ENSG00000188419	CHM	932343131587516	1359336177404	10455722590272	1406013696717839	454414258109514	373606950791053	1898914203906329	4305001787242522	929936648767023	-185048307991522	148789246077902	1717206547561152	2643525373652963	362034752209161	-6459169577001	365068942591874	5505397274246905	1779307715006633	5849576696575	1423321984415605	-253939104020117	1304483529155275	3246960579576792	-646113433815626
ENSG00000003096	KLHL13	-333042509429826	1739998761634231	408306312152064	147155044699223	-811707342564042	2422165565896828	0.0443282	0.222079	2940670508913988	1889445744338019	586146354813394	7.05371e+07	2.98095e+08	798508173696993	37325270956564	-1304063628898822	576201344176069	-3178327068697877	2304405827894062	313929596930481	1467424837051389	8457217080435392	10	659717611651164
ENSG00000141642	ELAC1	-160016512960822	5137603387277141	7666981066807498	320191730307529	-639487704205013	281397041413714	3235650947419219	5777286776702766	838349331215557	-277307893771897	73443415378085	4999470871701903	6144980027039668	286758917224578	-139938949679296	-626561801172691	1253745026372405	-2503982622547108	288739208267505	1127378707768786	-550163160688779	982524026654177	2927174914528447	-968246386113122
ENSG00000271380	nan	641233911641819	87900809912056	392926472203394	1117756144485382	161769456519565											2510820084860102	4376693943656143	633425639492859
ENSG00000179676	LINC00305	-128558405862769	599858566707079	7892248580211404	351620885388283	-608145490623969											-503384212309313	1376809250510038	-2381258827166776
ENSG00000256713	PGA5	-371044790993468	1298428669305355	3335431566177175	109111853544139	-849494277622529	-563261081825921	479821961217592	174797204656608	-5007530635903	-1118014766531989						-1452865634045735	427239153140682	-3326285861530951				-1966678623886275	-17484260457266	-390365287692149
ENSG00000057935	MTA3	-308089100106601	2085590964835152	4611166472605961	172127757149553	-786887849837907	-44675806781027	8754929878493403	9401888453635208	513721618640837	-602794760387211	145288890773131	1820272897029305	2771754221706979	358538184612626	-68092653938444	-1206355881106647	673984675430622	-3081143685689855	571196193367875	1409575399316315	-267702950438852	-155989747980269	1793706965753828	-2104714151386308
ENSG00000116473	RAP1A	2481008600347	9193628786022738	9593879737045596	504712315272933	-455206449496745	1862434483149757	387071	1.059e+07	2395793754831096	1317867581981956	378525666845888	5045425305027	13809643324032	591408467901043	165298729332437	97146549977561	1976255146922705	-1782409625261223	1488155211619202	2325093569047167	649863898477061	6502863777709611	8365137441401903	4601457629905316
ENSG00000197217	ENTPD4	2966552645243	99034196784241	995519018036032	482922006580829	-477002569018212	-111272172706608	6963422992529601	8356766036159842	447274971218128	-669125810278005						11615854728268	1890932858556277	-1867754666552613				-388517173574403	1561702296282385	-233631520128891
ENSG00000260167	nan	846340034117054	5367314723122	35843676648649	1320936569986598	36787204210829											3313935083129652	5172268669098665	1440442395847484
ENSG00000204592	HLA-E	-7381323750009	9759720978227016	9877554375498896	472597749182451	-487326388899561	1560709869566737	3.41469e+08	6.6165e+07	2100676052137253	1011251570682565	1027417071604479	2.7983e-07	2.65193e-05	1238063547319122	815845050067112	-28902364001499	1850507122539382	-1908178689424704	4039240145470083	4867386498809951	3207455053834986	5449364136103866	7334706445642494	3530879216766965
ENSG00000272148	nan	-161902750700779	5088096123460183	7636137342602272	318306926708638	-641366692405793											-633947567140962	1246364875937137	-2511340002167992
ENSG00000271971	nan	-79322227126051	7461829879404704	8661030995027708	400792691329641	-559071709069695											-310594679145997	1569346725096018	-2189105177571066
ENSG00000144320	LNPK	228075662518144	3519514733267984	6373479257579464	707263766893969	-252162704201925	1195860625619245	2.50652e+10	2865942785505	174249680059014	641876574961655	-318737167994117	3405803859802	81214261856644	-105448442420799	-531735992876331	893054693336627	2769367057747135	-987370085811193	-12530996421976	-414565412309355	-2090494141647185	4175458957555844	6084090167923171	2241171953613803
ENSG00000133703	KRAS	948065098165648	1043803896064	8237597841528	1421558830299858	47024253886992	2509272754437213	0.000241953	0.135809	3025164043260456	1978722388342976	224776823861653	389351857241735	738289025136888	437927237346455	1142186487752	3712250470556571	556626591034201	1841285044215995	883699128432205	1721689591085139	4490450511725	8761359957010257	10	6908893849268326
ENSG00000072134	EPN2	-187119688052678	445093722456437	7159160248739643	293105881457137	-666483446534699	-535949079238949	599108799805453	2040041814213085	22387201583481	-109095419899319	229079351280231	35342757289837	677033213525492	442223644708327	15726601150728	-732687187164635	1147687483135301	-260968734404809	900614305293113	173858070724137	61828365982486	-1871316218429111	7816700323079	-3809168380395891
ENSG00000198523	PLN	102178464968851	6767166449300508	8230978149449605	58185544244533	-37796922793832						-12370432275463	9095393230642068	9351072134751024	200995309453075	-225724911317628	400090727308992	2278317326724519	-1479979008809347	-48633751613487	790203263535594	-887426488059985
ENSG00000113494	PRLR	-339192455115552	1661790912993355	3965210601943041	140999421320837	-817823371869797	145062666115088	6108993393364914	7820237256047375	702762837867316	-413541533934593	647087867084754	2.65421e+06	1.26447e+08	859261981382708	434327075119937	-1328144400155887	552098341305068	-3202275036735257	2543994413382251	3378146603362387	1707535728746792	506499834229034	2453762021716344	-1443918852411785
ENSG00000151116	UEVLD	-1468117307938	9952202482086488	9979076533204372	478497584323231	-481427054916495	331987203333175	2441193237684042	4891431252613974	888609567237134	-226702260136033	128665448319056	2372740468495123	3436396653149585	341932017481199	-84718245369209	-5748570617956	1873608559160077	-1885079215140734	505841939509165	1344289062546677	-333065652894687	1159164297456162	3102663218273288	-791552094369684
ENSG00000179564	LSMEM2	-116067148305315	6357663193575303	8001226681472056	364098012843035	-59569762785213	-35334768472258	2150662589115215	4562768095127887	205326646554962	-909822238030407						-454473354990315	1425664779897963	-2332517886780308				-1233746411328263	716917145038429	-3176729237657101
ENSG00000178457	LINC00314	-134002027660972	5845023190279581	7892248580211404	346182953049892	-613569734549132											-52469929670701	1355516443801822	-2402498035426378
ENSG00000115414	FN1	-1452054260268478	2.41361e+06	4.56172e+07	-97891429087064	-1918644952120475	-3324563600587763	8.25415e-19	1.14282e-15	-2818607712624225	-3812080613766742	-1022340293902249	4.38877e-06	4.12162e-06	-810748317918364	-1233011200647841	-5685674033760825	-3833043789872907	-7512659879707718	-4019281041352364	-318741749978327	-4847523444099753	-10	-9841431826905876	-10
ENSG00000215840	nan	15946472686243	515213306654663	7676755024809797	638938032406384	-320743090416044											624401223584332	2501830323726003	-1255903935951759
ENSG00000225071	RPS26P58	14393365753735	5569663959530051	7892248580211404	623465280619262	-336260970674306											563587657594161	2441245106304032	-1316665858737686
ENSG00000059573	ALDH18A1	-564361137618356	211502268764757	814287515621483	-84628041418956	-1041502328470859	-379440197434091	1830615672274863	420813192122351	179208717494683	-935727345392009	-284553346494743	89420229843876	19656649579294	-71236158958173	-497611671112808	-2209816501779429	-331370163491568	-4078113956976591	-1118707613933727	-280061487224061	-1956336033695069	-1324850854097254	625723958716169	-3267179337160491
ENSG00000260246	nan	204515970721674	403925072673974	6807523507457061	683807075898055	-275717002924109											800804195847758	2677519870928675	-1079599466139863
ENSG00000156509	FBXO43	104563710003364	6696112423084983	8198449590308936	584232833104654	-375587114497727						-37710109314919	7290719397550047	7959861443616909	175664461113096	-251050346929212	409430409804314	2287626254572246	-1470651588405548	-148255456955774	690616267795031	-986992203922655
ENSG00000237264	FTH1P11	1529344494753	9950209132945032	9978471507554348	481488140179195	-478436497302877											5988312228004	1885318401031704	-1873369366386825
ENSG00000167925	GHDC	406997540326015	965834918773469	268888141747986	885230629880097	-7310760055169	-66650193953316	8151753975402318	9062070661610872	491802096932244	-62468705310464	151060533283676	1652705188560752	2563592435900311	364303553741801	-62319989398704	1593642476148439	3466215377701109	-286260642939367	593887124614996	1432241667070315	-24500800113376	-232715371175549	1717172910444421	-2181153134132386
ENSG00000184508	HDDC3	200442437986398	4133553973960598	6883503590596876	679750814882505	-27978906251732	-261502983054968	3589668298159622	599261900913345	297200194232675	-818577247047284	52309678215732	1.51753e+09	5.66389e+09	735636188895137	310082422700192	784853841971622	2661637146321673	-1095544051770407	2056529505740455	2892117825145253	1219073932866679	-91306206562243	1037702209280088	-2858138837763888
ENSG00000262528	nan	-131882419632739	5904599275077462	7892248580211404	348300379549329	-611457705446913											-516399744370965	1363807454128131	-2394228159187171
ENSG00000272106	nan	34527133943482	1587111236661166	3838043420612118	823868377467967	-134914567198616											1351946923018846	3225944903835884	-528272443039023
ENSG00000144152	FBLN7	1105120617049048	5.95804e+09	6.484e+10	1576719768863206	628491910432901	520937134102013	674516779822862	2222927846949406	1076076950035453	-37441050601029	-130188089245972	2317686754724499	3370538941484175	83195456682762	-34345312505115	432721818216886	6173815189719815	246092741390833	-511828128106879	327078883387579	-1350269222826211	1818900611250893	375722307749556	-130728921718126
ENSG00000107833	NPM3	-919184644180257	1690353263266	12764774975798	-441168635570856	-139300141401469	-1139186210478117	6.00284e+10	6302153392694	-58463503215312	-1686728376167841	-954617907374364	0.000143397	0.12028	-742770328110595	-1165604268221013	-3599165958633717	-1727443060778684	-5454446287145659	-3753033779193008	-2920165345785969	-4582516374364933	-3977574948921709	-2041307765811441	-588936951041989
ENSG00000171792	RHNO1	-4633166807916	8500497118556655	9251829717119196	43372711173469	-526176989646955	-7557163778029	7909747762756834	8930249976213194	482901392496873	-633573634778203	-877021797400094	0.669302	4.89372	-664905543576759	-1088345702571957	-181416610485202	1698304976889809	-2060302379227195	-3447968454503677	-2614043740159655	-4278778088739835	-263865424738338	1686095270402563	-2212181463233627
ENSG00000164007	CLDN19	-810448220028308	9188756008366	57328574203993	-33177644943507	-1285410500868709	-256176314678174	3688435476580755	599261900913345	302525640928849	-813282493140203	-62818033916921	5639551394425797	6683394296426385	150562582547152	-276141459736805	-3173396839502845	-1299106235339688	-5033162539092321	-24696603888475	591929455562161	-108563669110124	-894463505964781	1056296503325861	-2839651710455113
ENSG00000164978	NUDT2	-399540752450505	1028542722570713	2810419261101934	80576093842382	-877819735672726	214135217725217	4525828105949791	6626452802693263	771482245806169	-344545967595406	562917636137688	2.27009e+08	9.20594e+08	77534684756236	349977537656797	-1564444624278075	315504328617031	-3437197227405535	2213083252480538	3048238344382114	1375919633015702	747673093188376	2693702246596343	-1203014394709269
ENSG00000133321	PLAAT4	63057087149496	7969439939013937	8957197994287818	542855121844178	-417031457472475											246906780869327	2125607392793181	-1632931353800977
ENSG00000188312	CENPP	-43900687893587	8578314457951601	92970591022999	436153542549166	-523752659606286	86032167284575	7628549085554361	8770502855759632	643992160970957	-472464050468407	-444663979999078	4.37305e+10	1384158315199	-231523197888462	-657400716346316	-171897847105696	1707805926719351	-2050809655202578	-1748174766506334	-910222169131624	-258453887765364	300389339552263	2248558719566102	-1649652316824034
ENSG00000204427	ABHD16A	133091427469365	5870583319666973	7892248580211404	612662395585193	-347092621321612	675533781066288	176537074353888	817553104320815	1229167521864758	117708397033904	-166878593491811	1253044868511992	2029062022391084	46498399134919	-380103693208169	521133744092192	2398945252497913	-1359078347384474	-656075057424388	182806190082619	-1494359145356824	2358689229210297	4291753093592555	410989851363532
ENSG00000229782	SPNS2-AS1	951305506918078	9.88001e+10	7841405288549	1424762502243888	473505158001972											3724938638214339	557881023109039	1854060178994863
ENSG00000165272	AQP3	-522351639109532	328946447164194	11640682932263	-42495850136102	-999807360916697	253513133996791	3738443004690849	6013253991987663	810635150861717	-305188091873212	620144824884884	1.17575e+08	5.30648e+08	832403871677642	40732333545575	-2045323809337777	-166397054347509	-3914852844187757	2438069156052378	3272555253996619	1601371842294069	885164762120019	2830408267871913	-1065592699225728
ENSG00000184277	TM2D3	29334787726077	9047214195422254	9517614638874106	509225420800032	-450690997673365	17691005197399	5349205731133666	7285631400326662	734453977322826	-381736261367888	-56671311165907	1.88117e+08	7.68164e+08	-353780445565421	-779131468149437	114863504363262	1993926695162442	-1764728889847009	-2228004979518977	-1390870580122364	-3063117395775352	617697953567089	2564414592157936	-1332867775562938
ENSG00000274002	nan	550147727960089	246327220117004	922313862945049	1027397213654416	70371213338334											2154162373392883	4022883868646257	275546025620303
ENSG00000275163	nan	1649125726078048	1112.22	2.87906e+06	2112368276116417	1178491370121689						43361074053961	0	0	4507764092697946	4161244882558728	6457328472997471	8271204310942617	4614509226999003	10	10	10
ENSG00000271992	nan	910808705382332	1939032958187	1442021851536	1384717688382611	432738106815179											3566369072845904	5422010471888725	1694432422162353
ENSG00000180712	LINC02363	576671917587426	184883678278713	729408276074125	1053717759114744	9697800413938											2258020679764171	4125944784462543	3797277657374
ENSG00000182612	TSPAN10	-219453422698914	3704607882694532	6536067155966022	260783588969234	-698679837526295	-270829285323661	3420780290366338	5971857384488689	287875267067715	-827846914033943						-859293389510425	1021126083786414	-2735755762598704				-94562572021096	1005143355994551	-2890504744980678
ENSG00000240373	SEC62-AS1	95927230467106	695473932884167	8341271978908674	575624534485339	-384211996275089											375613348840401	2253919539008016	-1504423237101883
ENSG00000229766	TMX4-AS1	-134002027660972	5845023190279581	7892248580211404	346182953049892	-613569734549132											-52469929670701	1355516443801822	-2402498035426378
ENSG00000163406	SLC15A2	-714764767651649	34830818895264	180498399072983	-235610724245873	-1190642477565476	-247415235197279	3854513257112779	6091307262040105	311284021208572	-804573221268457	-100181722869519	3574803403865063	4761575993681054	113202910781595	-313475154868573	-2798738029894744	-922559034861862	-4662088190103181	-393859561068982	445051726753002	-1232412294040639	-863873379479582	1086877205298311	-2809242475071315
ENSG00000150394	CDH8	635206291866481	94476388586407	417724898580466	1111779084303172	155718709484039						314045688761696	39093371973356	921885483793	527052974047158	100752761337112	2487218293811545	4353290124111594	609733291179109	1234655320236276	2072083081348909	396104570974557
ENSG00000237821	ST13P7	-136558742040351	5773535226052331	7892248580211404	343628812712052	-616117249931815											-534710385793922	1345515433650347	-2412473104856118
ENSG00000224660	SH3BP5-AS1	-362395528100693	1390383870893875	3494622554795873	117771649374282	-840895236803757											-141899851847973	461147511551484	-3292615395876657
ENSG00000086289	EPDR1	-751829372177928	21149605063319	117213766375733	-272851626724028	-1227362766311387	368103637571201	1965050807751076	4389516544741697	924473133852847	-190557256857962	382328285613684	4425609787136	1223066284258	595203192905244	16910579478106	-2943868460136182	-106837977862299	-4805870415015508	150310502198279	2340012345463887	664831190749609	1285268197545734	3227884207465014	-665348442811079
ENSG00000205090	TMEM240	649727749759239	79328174185555	36130202497915	1126178151194696	170296480613581	479216671898464	925754003327219	2747674445369668	1034717768664523	-79264683898415	365754891339639	7769632361391	20720192582122	578663752636929	152513472491802	2544078618065503	4409671213286861	666814115945272	1437947530104752	2274988342104615	599599284302225	1673229724619792	3612813636601892	-276760039850034
ENSG00000078795	PKD2L2	-79119197891838	7468103835136403	8665511141497371	400995406985586	-558869301493377	-545246100233716	556009430003512	1933338725788468	13062960092202	-1100166554958386	140104780110169	1981241289808865	2968249290515953	353359587712069	-73277561354266	-309799696426243	1570140479966466	-2188312629019407	55081511494595	138921599798257	-288087161255816	-1903777634717554	45610544038888	-3841334180833674
ENSG00000153291	SLC25A27	-350350183595752	1526686198694665	3744475647567133	129830462617374	-828918646295443	6078464683843	8311845212564584	9152899385583568	618843944522328	-497653525353175	-208652943336702	552751044435483	1004872614999775	4709590028984	-421825590563101	-137183368149438	508365086824148	-3245719772531619	-820308877951514	18515523675375	-1658386751475967	212235266122225	2160751375309235	-1737603718760417
ENSG00000267328	nan	45811306021839	8517142265573042	9260586276940964	525658055840303	-434246504742978											179379077096527	2058270438307042	-1700338715863168
ENSG00000227533	SLC2A1-DT	-113181718112775	6441881302761335	8053401363112505	366979966212622	-592822009583915											-443175143917321	1436949377098167	-2321258095348289
ENSG00000241685	ARPC1A	497596787770101	421442732630462	1417874415518537	975229998203753	17676674626969	2607470949669496	7.9068e-06	5.04555e-05	3120318673840418	2079471921427771						1948393536605276	3818617547188959	69214913436646				9104228118328082	10	7260670244758093
ENSG00000226479	TMEM185B	-10280228183467	9665402465150176	9826925973277598	469705277590232	-490218370150677	583764474244891	403964905049917	1540921398541553	1138323999008459	25578536690238	-256121513267095	186260511530892	38108546863484	-42784456608871	-469225536088978	-40253334908481	1839181340111507	-1919502551869454	-1006929247234914	-168205006041794	-1844737327257448	2038268131644957	3974564457124283	89309847532709
ENSG00000162522	KIAA1522	-132416686468123	5.47652e+08	8.45504e+08	-849604196022845	-1792735460573209	-778507155496075	62216312497792	353829140904173	-221199226710366	-133099174131333	-26734238469441	8060318243705812	8570213180153073	186636844086953	-240080980918222	-5184917234079472	-3326716258804392	-7019647775213803	-105104355639817	733753656713693	-943866676046471	-2718230374258	-772337739687647	-4647281856798144
ENSG00000245248	USP2-AS1	21425814884174	9303321797328752	9646412861637348	5013365894557	-458583673894279											83895073808461	1963037130799404	-1795633509236256
ENSG00000131771	PPP1R1B	-624150905410655	107684009184842	465981616599144	-14462181749045	-1100815534114132						-476917835162232	1.16677e+10	3.96213e+10	-26382585547337	-689576590497894	-2443929743634737	-566282221622155	-4310361168677013	-1874979226176966	-1037218493144978	-2711036758777694
ENSG00000280639	LINC02204	-27293040593691	9113245958906192	954908914162512	452728595124295	-507188930654493											-106868824707168	1772707320980752	-1985952599801598
ENSG00000277383	nan	43434669187605	761555081214276	2234247620775353	912406926638728	-45710931667147											1700731009317077	3572627079413796	-178986050556305
ENSG00000117614	SYF2	-82048498324151	7922626433667	50199942777846	-341868939626395	-1295346215378929	521071831637611	673807021049054	2220909161140622	1076210450038721	-37305988326161	-552099827166801	3.85318e+08	1.52787e+09	-339138883351367	-76455964123913	-3212696861234648	-1338624462025096	-5072066893800922	-2170553563721332	-1333307991839645	-3005828968440741	1819370920264773	3757689205213571	-130257339183051
ENSG00000160688	FLAD1	-232910024905185	3418341014622721	6260272995912376	247328789037021	-712076338676538	41436588271344	1459269217306311	3685777943898499	97039039787626	-144237075106019	227162622853673	369066293211048	703448000601334	440309652437633	13808878937274	-91198415723194	968442373062073	-2788211198195925	893078780896554	1731055939908243	54288934561178	1446797143091358	3388208619244804	-503617206186732
ENSG00000105204	DYRK1B	24434246868869	3186560102154081	6009715230651359	723456363872564	-235896509309562	-378193285546309	1845060215876686	4231543081186918	180457017469881	-934489560601226	-779831461191798	71.1821	4395.08	-567415119128517	-991542118778442	956749115774389	2832770906142807	-92367805689865	-306586938430698	-223076488767252	-3898199516813332	-1320497144894372	630082514555783	-3262857496068412
ENSG00000123268	ATF1	53224721219366	8280662050647267	9136770253844468	533050878722714	-426846650374493	-485167115639943	885898129132773	2662589496123957	7330071966012	-1040617858973612	479701205851783	1.03691e+10	3.54363e+10	692353024400207	266613646205425	208407098599163	2087217828393515	-1671363793239596	1885921912394358	2721952173354126	1048178556544062	-1694006254166389	255936302227235	-3633414352440928
ENSG00000141524	TMC6	-596650951145447	14789448329938	60383004489455	-117023742072013	-1073538987694855	47324298902469	8681774336291918	9358541672845204	605433642570261	-511080024361196	-338088092030199	18935132442393	47431808649303	-124817692064706	-551051030184262	-233625072627736	-458219000376299	-4203556928677001	-1329176856971169	-490714673316982	-216643026949798	165237205347439	2113928054756899	-1784483592844929
ENSG00000130821	SLC6A8	-577988415063332	182218344127226	720476680276862	-98298778384471	-1055023974864777	-1531524345460271	6.16803e+07	1.15974e+09	-981648169520255	-2072077319235441	-544711360553921	5.49969e+08	2.14701e+09	-331736467454278	-757191790099672	-2263175566684779	-384899398805978	-4131059412183878	-2141506167312389	-1304205754499658	-2976862620760854	-5347460155447088	-3427516179378491	-7234851301229003
ENSG00000128829	EIF2AK4	-693658141357841	45827977018464	227313943124521	-21440964497124	-1169726104778392	-258962700802295	3636561483287126	599261900913345	299739933430804	-81605222399189	-75260999931826	4893971210353265	6043481400271963	138121615987337	-288575098088185	-2716092773210735	-839543937411441	-4580187891409111	-295884953359896	543018401847258	-1134518934321825	-9041924331089	1046569945668007	-284932248416146
ENSG00000109193	SULT1E1	-298484531531224	2231060159769601	4810388518099433	181738158915534	-777333243519647	295653883386883	2996424087374943	5539638122204465	852516064818673	-263049589198497						-1168748163785946	711615233234119	-304373160094001				1032303120679036	2976639386771446	-918462185283085
ENSG00000111728	ST8SIA1	70610812374063	7732487193484994	8824894106623196	550386613374587	-409490295998644	-445514383889751	1179316669084082	3230781785013293	113036053432255	-1001293294663733	583931242473758	7.90067e+07	3.31982e+09	796299586875699	371033067765551	276484201316097	2155097754828288	-1603403128066333	2295697221685085	3130613017853171	1458698423489386	-1555555041348706	394675927711951	-3496108966861702
ENSG00000122861	PLAU	-131901331144501	5904066494542535	7892248580211404	348281487692148	-611476549528051	585856797849542	396828764588541	1520927300095184	1140396248457273	27678025784792						-516473794421508	1363733481037205	-2394301945205881				2045573674740852	3981799909431997	96640409605197
ENSG00000167363	FN3K	306821404956685	2104387971603454	4637257004383824	785626799531927	-173396273046125	753667267682419	80913250965475	438128281181863	1306439729157539	196223579573496	505644920182303	3.3485e+09	1.20692e+11	7182304966701	292600154012451	1201392084922288	3076205908103878	-678951685336449	1987918360908487	2823688194435232	1150343245525519	2631499588199629	4561556215460272	685132937284861
ENSG00000004399	PLXND1	414103894487645	908953704059299	2560980628509305	892292754477888	-65989592586388	50755514601916	8587166930785175	9306600338431014	608852292248936	-507657628872038	-422985707625152	1013462782805	3062405073257	-20981462526248	-635772369873412	1621468167265531	3493867883222094	-258389320105372	-1662947695166696	-824875973827721	-2499508087560713	177217615121482	2125864589096909	-1772533979658105
ENSG00000135968	GCC2	-1278053559563514	1.57389e+08	2.25829e+09	-80301707741924	-1747297658766121	-247907798621587	384505675339341	608734036945755	310791632299654	-805062894548435	769518013828517	1422.46	8620.16	981267359699694	557072204416312	-5004355647165902	-314429940442095	-6841731193888554	3025322568627832	3857804802239337	2190102222547179	-865593210635597	1085157983479064	-2810952215018729
ENSG00000228205	nan	-146569786328134	5497650566525594	7892248580211404	333627243626614	-62609167344804											-57390970231764	1306353218296614	-2451529028825135
ENSG00000076053	RBM7	-562967757078	9816729504474384	9905495846039392	4743454693421	-485578887009206	58096820592878	8385443977912602	9199319850102268	616166272688478	-500334753774765	-766872827108237	1696.38	102170	-554419533393135	-978632022984816	-22043605709824	1857350508080746	-1901336158540147	-3014923145951184	-2179673375698441	-3847444104378883	202850469990541	2151402034253496	-1746965477974108
ENSG00000267278	MAP3K14-AS1	-314651695555211	1990224234597097	4463548822296956	165560665694011	-793415801328954											-1232052426722883	648270525217527	-310670457917839
ENSG00000069966	GNB5	-695767872554357	4460219264737	222257617548916	-216528623428461	-1171817009012652	1530601437321486	6.2833e+06	1.17851e+08	2071172815957179	980712205928456	175738071093695	1064667145817833	1767503199092169	388952667882475	-37636477648266	-2724353651753957	-847841024594735	-4588375050964439	690905661846347	1529148458030874	-147965977646794	5344237735565929	7231693143635678	3424248175164957
ENSG00000231043	nan	-120288550285483	6235296953223141	7945722789840528	359881553573974	-599904531507065											-471002706738004	1409154781865191	-2348990468782151
ENSG00000014257	ACP3	-296489767810641	2262160702898693	4854539164839492	183734022846795	-775348746094112	-184343763705436	5178961516766925	7148234548788983	374310749889971	-741849598029133	25004201689602	216155063157368	436186793542942	46315536453526	36701159887876	-1160937452712718	719430252300137	-3035961088645006	983028003538489	1820872743626014	14428882145487	-643653451701231	1306940909379141	-2590237091923613
ENSG00000156603	MED19	377317034081721	1234747646747145	3222974193187887	855729655050302	-102831521650096	265065332636676	3524550366152785	599261900913345	822118077526375	-293638484680257	-382688274649193	4370771311888	12088566654846	-169466207981679	-595562431460339	1477425273885724	3350701149927427	-402647840714962	-1504520301331698	-666248137682975	-2341424674335622	925500341582211	287050197776898	-1025266168042294
ENSG00000277443	MARCKS	124765755472211	6106640893507426	7894755082746229	60436617364727	-35540940379405	1582337748114181	2.18726e+08	4.33373e+07	2121863130844459	1033195394858129	-3059765067199599	2.51664e-169	2.20082e-167	-2865109002100609	-3251896059479125	488533683348542	2366460506616554	-1391643600241646	-10	-10	-10	5524879892103518	7408683107869862	3607498126407413
ENSG00000251595	ABCA11P	-182834287956433	4555902780171822	7223680661518712	297389011461401	-66221550014938											-715907243936487	1164458537575074	-2592975742695118
ENSG00000267026	nan	-135567477393277	580120300807951	7892248580211404	344619086821841	-615129559247355											-530828982861079	1349392958028322	-2408605696156815
ENSG00000160408	ST6GALNAC6	434308205243975	76181562980986	2234707602726091	912368688256192	-45749490231373	249857081882922	3807772514185508	605769937928746	807000713897618	-308843013069569	931453486402863	0.00948258	0.000764187	1142543286053869	719522996013532	1700580310785608	3572477352929995	-179137030745819	3661963987069994	4491853246860121	2828769592613511	872399315026014	2817718292090194	-1078354197615715
ENSG00000167580	AQP2	-69530275352562	776625909926305	8844689451685701	410569069340885	-549309290275322											-272253242836261	1607627180671061	-2150879380805316
ENSG00000110665	C11orf21	771758380834252	16028410389932	92672181092072	1247101261254227	292880925629298											302190262878695	4883158606808889	114680664448892
ENSG00000254959	INMT-MINDY4	141616567884475	5633338590601071	7892248580211404	621156693782696	-338575894183783	-315295628339903	2686610976896801	5183314565256939	24340210516518	-872029979751239	17123221152983	8750296969652847	9096868877643452	23047523766636	-196244385211663	554514844798025	2432205587196173	-132573018976726	6731910945657	90610216459115	-771525236418496	-1100884105911865	849861161515898	-3044774041560313
ENSG00000108468	CBX1	-847435795527199	5278206265106	35314298953584	-368974221219634	-1322020973598137	304796212687658	2849377304045392	5378427884153857	861599426607415	-253905125567681	-1715035001396255	5.45088e-42	1.3486e-39	-15071896824433	-1921364768319853	-3318225654334413	-1444758096248902	-5176514767626075	-6742576525137713	-5925442783091033	-7553751948241952	1064224416483954	3008354792005968	-886533437265679
ENSG00000168763	CNNM3	315068188826207	1984281043458214	445598111314682	793830082074273	-165143873103227	-68556479387323	809988679572073	9032603429085232	489900317489992	-62658596372052	-19002793959704	86144384652904	8994801719432257	194365523219468	-232353810040687	1233683250749872	3108326739824034	-646638529171838	-74708558344533	7641385820632	-913487680327912	-239371344639816	1710532670070812	-2187783357731033
ENSG00000105298	CACTIN	-65074478205704	790596328932248	8924188958807414	415017475380866	-544866628327988	99149868414493	7280328795517848	8555069766658363	657055470358093	-459373703060152	-27811782806488	106155096635772	229807571332221	-64795840752882	-491186797791778	-254806091699559	162504539113688	-2133483661949697	-1093406686864041	-254741690071199	-1931076957351967	346191017032106	2294170483200845	-1603946147415694
ENSG00000128573	FOXP2	1932161911790246	1.4116	545.809	2389960585350032	1465792830550297	-770454509834348	67801449050592	378524951994329	-213101808232967	-1323033162508632	-267557337923342	139697898146057	294061412148487	-54227857782768	-480643393849362	7565586983544459	9358146739863592	5739468877693099	-1051888634541895	-213194180058672	-1889626078588966	-2690113810554876	-744064847520948	-4619493736303515
ENSG00000128833	MYO5C	-75904315477991	19144036770565	107707711579849	-28010126770852	-1234508022359566	-1772123323324263	33555.8	8.28737e+06	-12259829454041	-2307563387521171	-357444039360292	10218504690416	26789831605255	-144193571008567	-570369487136971	-2972114798821694	-1096766524647201	-4833848430637454	-1405273820580329	-566889997094297	-2242379841515562	-6187533936437055	-4280633847734125	-8057072881351771
ENSG00000197302	KRBOX5	435759931339326	752037835163624	2212051195837063	913811040549155	-442950409498											1706264699854474	3578125037871272	-17344197874953
ENSG00000187239	FNBP1	127029846281618	6042031443345734	789372724830496	6066223213777	-353147796249772	20972511369868	82.5919	29760.4	2624788597967341	1557214184694485	65784629435375	1.44034e+06	7.03055e+06	8699856334133	445110607622121	497398973494615	2375294694785846	-138278803358625	2586290645874461	3420306118699596	1749930661239769	7322748034823153	916469430323286	5437158626197494
ENSG00000227676	LINC01068	-186319281559792	4470436945198087	7163062017294611	29390587734613	-66568631328398											-72955310978366	115081995275274	-2606566083397526
ENSG00000100034	PPM1F	-280141421991489	2528726521525934	5223593237493195	200089943544411	-759083109054508	8805147505248	9753645588452996	988401866608532	567046570955901	-549491160959978	58160220034273	5932071347455417	6933768302309266	27148696770932	-155219478027435	-1096923753044423	783473612216654	-2972271244064711	228654070605365	1067337782533537	-610237813187407	3074399410412	1979896012399523	-1918599660340867
ENSG00000105821	DNAJC2	-831064361263126	6764536966998	43723839333204	-352508114232905	-1305818049558938	590863926551709	380183814969132	1474834310234308	1145355141899187	32702501974982	-16724766426805	1244710508674195	2017415463412208	46129233240607	-380472333125771	-3254121549386261	-1380283290111656	-5113070482518134	-657526041194374	181354832360564	-1495808435227076	2063056531808976	3999114348588218	11418383704641
ENSG00000102221	JADE3	-232593169279591	3424914708803634	6268580613878122	247645622227821	-711760918090639	-3361911428579	9905926167208894	995692024330725	554917800995512	-56162066807885	32445197557653	7657010853893731	8249639956942715	245788619524636	-180927763942807	-910743475081015	96968296736716	-278697613509668	127556712969464	966305979063754	-711308686361071	-11738427445673	193754728037315	-1960950966224866
ENSG00000197019	SERTAD1	-1113155056837766	5.08948e+09	5.62401e+10	-636593872862205	-1584651032177399	465089921535938	102613979513648	2950926941074129	10207089947799	-93421941699079	245766162746822	23960606151124	478048461327769	458885974474188	3242272744266	-435867789199684	-2492651515870114	-6204870901007139	966217691336217	180408784467118	127468372807458	1623904857592064	3563900695454897	-326191426444605
ENSG00000165175	MID1IP1	-1316950737898538	6.476e+07	9.90579e+08	-842312553959051	-1785626360308305	-874525609434736	21054849248499	142991028500613	-317807916340009	-1425833690258743	3981979719343952	0	0	4159996949625812	380091171189911	-5156661716503228	-3298165053054047	-6991811331435116	10	10	10	-3053487765462129	-1109655993880474	-4978431371041174
ENSG00000086205	FOLH1	-137939290868605	573510565293798	7892248580211404	342249627709014	-617492805600978	-409743206635135	1504822962501882	3749747008982929	148866618805567	-965803257592947						-540116072647312	1340115087000715	-2417859240460104				-1430656638231903	519781689986559	-3372192190929334
ENSG00000235280	MCF2L-AS1	-190606026884543	4366569259841954	7100785423528856	289621259337442	-669955456699876											-746338320398156	1134043071872216	-2623282371851976
ENSG00000064787	BCAS1	-220721234817449	3677019477289547	6525532552239375	259516020889478	-699942060990882	-158225864017967	5789180029154162	7596478910289527	400397114770395	-7158628209142	-26182992777908	8099540452892274	8597943759410013	187187901051716	-239530048372962	-864257643697943	1016162785158882	-2740698133812903	-102937160068713	735920110314698	-941700711594678	-552460367936878	139802388642225	-2499501834856037
ENSG00000122257	RBBP6	-462007454993384	592225904343523	184664388328456	17994777678726	-939885624516873	327045165218212	2512159553105267	4980498567273264	883701007767074	-231647071763711	127003888264066	2433863965508593	3508299220784112	34027211940606	-86379955372162	-1809039690964522	70460480018366	-3680222865110152	499309597129703	1337763254160001	-339598584787258	1141908710246725	308552452487635	-808817365557556
ENSG00000174059	CD34	-12807505627281	9583212848028396	978740785676992	467183542647823	-492739546275882	77962671631412	7845217722388889	8895137033477819	635955174884557	-480515766286595	-39328681832009	7179299395228873	7870596554425443	174046359456596	-252667916737423	-50149160520222	1829307216757857	-1929374487114467	-154618795924996	684254779991271	-993351600790786	272213942531803	2220496832731394	-167776563389168
ENSG00000109606	DHX15	-460693824443281	599493890015724	1863640287134621	19311205601554	-938580805042001	54436474431007	8485898514146171	925256421776464	612519625854739	-503985985418729	-918834499729705	0.0260241	0.204046	-706859811679519	-1129979691170085	-1803896029799068	75615094596445	-3675113704653811	-3612353055955358	-2778984900549212	-4442460085865869	19007002982727	2138669426572652	-1759714093947651
ENSG00000168496	FEN1	252520339868067	3027221093196312	5828990673595796	731595973655017	-227717984841393	-453170330789526	1117403674089354	311343906995625	105365532048885	-1008887233498051	-588412888184508	6.27833e+07	2.66795e+09	-375523899287243	-800768008486324	988770446580187	2864642420349502	-891654168070592	-2313316593382272	-1476353908754618	-3148180399645198	-1582286494309358	367893586581912	-3522623912875971
ENSG00000164654	MIOS	-724508680974071	30614043520152	161839630656241	-245399696267117	-1200297135171508	-71859566151525	8010212922048607	8988844260550197	486604942540853	-629876176230609	-106268797874611	3290192661166097	4454759972369058	107115925853093	-319556779722675	-2836891366502335	-960888803632422	-4699892036390108	-417790599795697	421121042158011	-1256321905764352	-250904380281013	169902656095148	-2199271441712726
ENSG00000082014	SMARCD3	-157354052047071	5207907584530309	7724663762837238	322852108776875	-636835418295643	-952738316422343	8036113645578	62571580174931	-396578358000755	-1503013318228574	-602870476246738	2.95724e+08	1.29146e+06	-390011706529251	-815182354452548	-616136650200428	1264162023310481	-2493597312894681	-2370155896253141	-1533312016858042	-3204849698323039	-3326574729770354	-1384690340840997	-5247911243564433
ENSG00000241684	ADAMTS9-AS2	-589855831814726	15966987751908	644938138058598	-11020550310797	-1066797965191744											-2309643708487375	-431521455184931	-4177161732811628
ENSG00000244558	KCNK15-AS1	98060970322665	6890498356829202	8295278643076593	577751378273932	-382081188314314											38396823586047	2262247423739013	-1496079830229973
ENSG00000116668	SWT1	-257218186182837	2938122678904097	5724993045829868	223019472537053	-736271551785477	82211592666772	773091314623837	8830296821135546	640187068516335	-476276297532402	-2181978065465119	3.18765e-77	1.33753e-74	-1977825350998991	-2384238731408301	-1007165367167761	873256639729501	-2882950147475526	-8578340424885184	-7775723977418048	-9373518375794028	287049446784529	2235272884215722	-1662963133160621
ENSG00000102226	USP11	278310752046845	2559883770142209	5263218783537256	757261542038549	-201921301697532	1124720218303201	7.45408e+10	7670649647088	1672488017566333	570030121563594	374425331448416	5803851459826	15782794956564	587316575349515	161193668387396	1089755568732409	296513870324528	-790644491282696	1472034942835371	23090064929007	633725051433263	3927065587452091	5839647969625213	1990313357735032
ENSG00000170248	PDCD6IP	-61613959272258	8014930270816193	8984414367489114	418472122832784	-541416179566226	-348299193641464	2216974878709813	4636342109017806	210379175050004	-904809137250179						-241256059044723	1638572433376704	-211997306013104				-1216119133654603	734558519719533	-3159225528521186
ENSG00000166448	TMEM130	1388614993386835	1.17711e+07	2.01043e+08	1856206027793665	914749311068712	2399931872769699	0.00913861	0.0445142	2919090947971733	1866672406807507	51295698996493	2.41081e+09	8.8245e+09	725523379616905	299924805113245	5437270787202332	7268173581602536	3581798936619865	2016665406902517	2852359808319305	1179139754358767	83795860663035	10	6517660883592269
ENSG00000274370	nan	-247426891717614	3125829857831155	5939214613860572	232811915381113	-726526430927657											-968826504618966	911599998878672	-2844792082633704
ENSG00000127329	PTPRB	17058833875355	4863391486280273	7445998609512919	650018459733014	-30962750172808	104054215266849	7151521543748947	8473012867640043	661938990534461	-454479090319037	-47574993831559	6621340672674589	750503105423189	165802272866598	-260908946689086	667956917762923	2545216924115404	-1212379657484756	-187038769664226	651843555341238	-1025750808416171	36331500168126	2311221749567493	-1586856150324208
ENSG00000228929	RPS13P2	33947011482843	8898300057869118	9441925113153068	513825622341913	-446088000855174											132923160651099	2011939277179799	-1746705362625765
ENSG00000100216	TOMM22	-241801675264325	3237162440319336	606566621516944	23843737483022	-720927327981183	1075148446256851	1535096737216	14485454341889	1623672100569204	520000306972961	-819810772069785	4.46389	295.557	-607512967760353	-1031367190983205	-946800366892656	933627088081144	-2822868195141211	-3223046096617598	-2388407625385414	-4054769847297046	3753981119915862	5669202640520563	1815629591916465
ENSG00000155849	ELMO1	-358425196878353	1434236837762497	3574720376679886	121746574416077	-83694772069565						184501491383672	901141098026992	1532996640035467	397705370133977	-28870310243053	-1403452261184831	476711756438655	-327715847360602	725358621627931	1563559280366541	-113502217715541
ENSG00000204842	ATXN2	223502080411897	3616955568598615	646942713071243	702710594573346	-25673565648969	231442825554195	4168798040541557	6350392244689325	788693072992943	-327249302276715	471684418046578	1.45409e+10	4.8843e+10	684356127034587	258584217345867	875146342571584	2751538623684473	-1005275970454488	185440430183925	269051276109288	1016611248299832	808104220859252	2753795455624567	-1142621473834082
ENSG00000022277	RTF2	64561548287224	7922089520535414	8934285071151029	544355198277923	-415529542254844	99790939774221	726344721197523	8544692569958046	657693834544912	-458733919330162	-459434895132833	2.41311e+10	7.87067e+10	-246315910132902	-672136468551508	252797659646819	2131481102792437	-1627050443846403	-1806245899488796	-968378996392453	-2642471769296134	348429377501599	2296399391323525	-1601712282825578
ENSG00000258429	PDF	79443716732516	11601531455448	69969807604591	1269558671147157	315678519306237						387799055970636	3657582445637	10233977571045	600662498694127	174583070970332	3110703847168913	4971093001402482	1236073065137165	1524613089021173	2361475340111636	686364835150694
ENSG00000231503	PTMAP4	-226271637926389	3557749736870688	6416283376568749	253966504368568	-705467816678853											-885990841758717	994433058628531	-276233482225607
ENSG00000075914	EXOSC7	8028312390487	9738667234296532	98689179209528	487971839373487	-47195220322585	-1035117434017478	2691156361875	23977951282002	-47961973568592	-1584231862942527	456817355300411	2.6847e+10	8.70827e+10	66952522755483	243694439614632	31435717343697	1910706019910964	-1847979418180478	179595516920438	263220580257747	958072812808189	-3614209105473657	-1674637059442717	-5531493370762507
ENSG00000256982	nan	125429487888806	608766851880834	789372724830496	605027582577724	-35474640445788											491132598740107	2369050324149188	-138904755530503
ENSG00000248592	STIMATE-MUSTN1	-13160364188224	5912455645143082	7892248580211404	348578867170225	-611179921305829	141751181757277	6190664144582536	7873619006455482	699466953695314	-416847989724665	-133327828791138	2207041003815835	3238098193349837	80055381207178	-346589671567138	-515308160219757	1364897902245792	-2393140465620086	-524171861112356	314733829688035	-1362600402593088	494937477606189	2442254134597871	-1455463651321165
ENSG00000116791	CRYZ	-742724728711764	23955193119937	1305803579408	-263702444959916	-121834390761526	-861271654795292	24609769275726	163290786844021	-304466296837961	-1412748155058021	-634864393516954	5.25351e+06	2.4409e+07	-422075679155865	-847077422004123	-290821825314416	-1032555177153379	-4770556107481817	-2495938422765855	-1659369962590261	-3330243601984392	-3007210346140251	-1063072484510992	-4932742003904452
ENSG00000261200	nan	1635536323354	9946751895297716	9976862684846634	481594085770879	-478330548492467											6404117710619	1885733242347288	-1872954512467974
ENSG00000108064	TFAM	-927963284947706	1462071136554	11152559679484	-450005221654855	-1401682696485422	-171953322545466	5464268238351244	7364695047089458	386687180126183	-729522305850454	-248156295858684	226239120624178	454355851048899	-34814292152859	-461272503862441	-3633539667129962	-1762043660370325	-5488438778799832	-9756143831815	-136870692911833	-1813470368652723	-600391070265538	1350154370367203	-2547195201048395
ENSG00000119185	ITGB1BP1	962510492670935	8.15959e+10	662394055893	1435839691525541	484787730688477	-60683704599844	8314606612400922	9152899385583568	497754221262914	-618743385087951	685352546742707	2.88773e+06	1.49332e+06	897400740234208	472683301177491	3768812960467214	5622184152567747	1898238301199346	2694430136614478	3528087275080839	1858331362187504	-211882816877496	1737955307924991	-2160400262661121
ENSG00000185880	TRIM69	-130338122874008	5948180039469926	7892248580211404	34984305975123	-609918903473145	-256165043194765	3688646246076562	599261900913345	302536909490828	-813271288855927						-510352884951321	1369847983746303	-2388202815186779				-89442415052874	1056335848561456	-2839612589651115
ENSG00000141376	BCAS3	101222017397673	6795739430217622	8252334873635928	580902129078692	-37892440445955	572315509008023	444964378884749	1656111312418068	1126984022878317	14091233932243	-485171977544216	8.20766e+08	2.84291e+11	-272093202180449	-697810065689591	396345654367231	2274584526096443	-1483719104818852	-1907429984683119	-1069721163811724	-2743406265232457	1998293001241887	3934969872356889	49200858097432
ENSG00000225470	JPX	86419240088787	7243602935735229	8527521806400412	566146743797605	-393706391309757											338383793797974	2216808234089765	-1541599558119596
ENSG00000197444	OGDHL	181299365423633	4593834538952604	7248001073162603	660686786430015	-29892307801113	278532503364092	328517674514815	5828662841170354	835502626427527	-280172451435775	267931814576721	138364642247388	291532848914613	481017272744077	54602591984131	70989709030286	2586989900335728	-1170465339515273	1053360871254399	1891095965242415	214667429308523	972522224769982	2917235379141084	-978248256482323
ENSG00000284188	nan	-107876305337583	6597922655246735	814622737072717	372278777758768	-587534430145052											-422401231757375	1457697441438506	-2300554011527459
ENSG00000100099	HPS4	247885424582328	3116867098029216	5930181208410714	726982821869721	-23235334930333	13912020296282	625588873092437	7914010495954041	696848282465569	-419474886097481	-927706472766019	0.128156	1.02763	-715762787244514	-1138812790632732	970621939179413	2846579130266523	-909804434268895	-3647232785568808	-2813986515093252	-4477186985918965	485751169654318	2433110799656585	-1464635705116954
ENSG00000135077	HAVCR2	-228114410610806	3518696356483392	6372533083550522	252123960586576	-707302341218759	-8905106980013	9750849779534064	988279339899981	549391503170506	-567146209040809						-893206415645038	987218381034181	-2769518099648825				-31093011937268	191825169587007	-1980243908069997
ENSG00000259353	nan	-282544525137374	2488228668955527	5170685145049709	197685888076768	-761474214348207											-1106333360888196	774060275455002	-2981633873032762
ENSG00000249201	CTD-3080P12.3	-64249049196358	86582586211688	388328563432188	-163030902427372	-1119002141198999											-2515740359743942	-638364966100176	-4381572777288333
ENSG00000225850	nan	170811271565696	485769539097704	7440980486164475	65024051498212	-309404717570272											668829835074606	2546086405234979	-1211507322245061
ENSG00000061676	NCKAP1	784422770106651	13394978072731	79189580772007	1259642628933022	30561104552182	1425104517257914	4.84659e+08	7.7481e+09	1967718799424811	873787000142505	1602855130349184	6.96613e-35	1.51175e-32	1810025535499908	1394262875646375	3071491401885694	4932265675676954	1196652792873342	6301546829242779	7116027180568157	5481476545697733	4975885395471201	6870473791839122	3050908842200245
ENSG00000245526	LINC00461	-133109501195405	5870075495935547	7892248580211404	347074566169848	-612680404659007											-521204513702978	1359007650503256	-239901576895598
ENSG00000156463	SH3RF2	-533518986377404	2932706926742	1063149454321537	-53694150519175	-1010892733245886	-361657963254368	2044635535710908	4465011724619381	197009100556518	-91807364670822						-2089050754069986	-210245199318703	-39582588072645				-1262762524236379	687875657092372	-3205539800977043
ENSG00000226856	THORLNC	-154519758704802	5283289333721376	7781317265975332	32568411050368	-634011882207492											-605038670943633	1275251029501395	-2482541454818951
ENSG00000164849	GPR146	852372274846064	4893580246861	33038569835941	132690614439992	373939757067739						65826285798339	545439471208855	6544695541594684	27914751703405	-147554874615217	3337554968017414	5195643177313085	1464201183885352	258792834548301	1097454858864069	-580104798409494
ENSG00000114062	UBE3A	-252673349586332	3024291161238865	5825100860495375	227564956773931	-731748261412258	1701638933530265	1.67546e+06	3.81235e+08	2238641743940706	1154335509124885	-52667363705882	1.28632e+09	4.83155e+09	-313665670567441	-73920342117457	-989369572525998	891054970276534	-286523871937957	-2070591736466384	-1233161297225887	-2906142225001487	5941431112723122	7816426531858908	4030470138695669
ENSG00000146909	NOM1	-478974122823181	504742994121516	1631984666625895	99048413719	-956737014481111						48096527027962	6586636501017061	7483947629154589	261430136076319	-165280870660177	-1875474496714471	3878346762782	-374620628802627	189089152008776	1027799839091724	-649793687977419
ENSG00000133627	ACTR3B	42182700119573	850220210036086	2432411352756004	899967247814211	-58253268937048	261916868840244	3582064145313791	599261900913345	818988639890993	-296786390092336	492205430743394	6.05528e+09	2.12446e+10	704825679528919	279138136966068	1651708819059083	3523918184149921	-228096915962231	19350816631578	2770987809133294	1097417981583938	914507186460522	2859575254263888	-1036257373512912
ENSG00000178202	POGLUT3	-256560451863233	295049025946037	573844236716845	223677312871949	-735616947859608	260435399991426	3609329285038481	599261900913345	817516085550162	-298267557859421	183429947598171	919980501635362	1560389396196705	396635154449613	-2994220752895	-1004589937967619	875832484043877	-2880386975667454	721145899457308	1559351779560813	-117716329655743	909334499742173	285443369338197	-1041429008976297
ENSG00000103254	ANTKMT	1479808283564708	1.18002e+06	2.34881e+08	1945949464010863	1006998180674592	1436524957658132	3.91225e+08	6.38851e+09	1978923922867115	885355929502383	2119739140602119	5.50084e-72	2.16902e-70	2322595211539358	1915039825159356	5794347885630927	7619573621506175	3943009269396935	8333651125022834	9131169881648534	7528885742454853	5015760928745516	6909597525864113	3091302838532402
ENSG00000171532	NEUROD2	-861238580579428	426754232072	29298711814264	-382858843902865	-1335679717116108	-494867140085801	823898178123544	2561855706986849	63577803196985	-1050234962523983	-2353061204823254	1.65876e-92	8.11688e-91	-215049734357654	-2553601282076246	-3372271938080401	-1499124824007421	-522999704131161	-925094544947296	-8454575501004613	-10	-172787479460771	221987832171586	-3666993366838484
ENSG00000125821	DTD1	1046154970166152	1.83192e+10	1719879335098	1518492720732293	5690499251256	1131149978663842	6.77229e+10	7032409008601	1678817771806301	576521334491512	2974883275161697	1.17197e-159	9.54052e-159	3168134850504188	2779162807150409	4096331874033237	5945820944133384	2228175951635546	10	10	10	3949515695698504	5861748897169939	2012978033354101
ENSG00000161057	PSMC2	96917507825832	6924897339547369	8317787894054196	576611616766041	-383223085050563	258168677830881	3651297139240122	599261900913345	815262955959167	-300533771859743	-1450053953484129	5.0775e-26	8.70816e-25	-1240531524595504	-1658283922688501	379490885939936	2257784565437218	-1500551049247179	-5700816449218487	-487708923119428	-6519462424982544	901420027815617	284656668118029	-104934170661402
ENSG00000102362	SYTL4	-155525340299098	5256481169718945	7764945494353324	324679350779354	-635013656011567	362546406126442	2033528936027105	4462040783511384	918955750657938	-196119834970175	3795284245393526	9.12131e-280	1.79031e-277	3976444882708238	3611165710655311	-608976133417287	1271316785147667	-2486464007482016	10	10	10	1265864605422936	3208619749224723	-684770703322178
ENSG00000113391	FAM172A	-319958318834307	1915468159252224	4361314703421121	160250103890381	-798694110681091	54950855637652	537129478297122	1887868054073545	1104389875516402	-8787699417649	-407828102972126	1783311805036	5202675976212	-194637028442823	-62064848626346	-1252831078740562	627476451485049	-3127372364981418	-1603356311184674	-765205991616915	-244004927621613	1918660398060853	3856080298631026	-30683072478225
ENSG00000234222	LIX1L-AS1	896717094700262	2436379805183	17745117302749	1370779719964014	418556190531043											3511191861400584	5367434863187751	1638901609456516
ENSG00000205413	SAMD9	315335189204018	1980477880154579	4450031518506955	794095663203439	-164876679963315	194986445771844	494018998314843	6962714551485342	752436678669535	-363678733956575						1234728719336455	3109366651190485	-645592305804596				680813369182075	2627202871837507	-1269818233696942
ENSG00000188529	SRSF10	-977827155332332	6.26088e+10	5277517210843	-50021242333573	-1450979744239284	-1222372250442895	1.64313e+10	1958125518773	-668666016139356	-1768572580491251	-770407611741071	134.048	8142.9	-557964326100358	-982153638301684	-3828786994193527	-1958635337909953	-5681466651121475	-3028819979466162	-2193609555470132	-3861289163369952	-4268026769370827	-2334709787151406	-6175136186523348
ENSG00000263089	nan	352802703704823	1498141035127602	3693813792048445	831357279673151	-127375313411653											1381436786752198	3255268502804917	-498751687056707
ENSG00000273747	nan	-149928566065779	5406565007748318	787616278218855	330271427405392	-629437952054299											-587061364250658	129321316032967	-2464631741238801
ENSG00000167487	KLHL26	-138583877940919	5717204210885074	7892248580211404	341605671152119	-618135055096892	492017022792816	841739748185849	2591341446531263	1047409317291587	-66434756304164	88114417346314	4183244324090407	5376283083670937	301418187070655	-125269570233515	-542640022392052	1337593606106653	-2420374037173995	346417537509005	1185010912743814	-492491210315209	1717923344140882	3657127362854639	-231963150521507
ENSG00000169750	RAC3	1574228084810685	93309.8	2.11316e+06	2038785956045099	1102596646328909	2291011473133761	0.283692	125.88	2813298642518137	1755191093751886	945575726228028	0.00301419	0.0248348	1156602734875796	733695508807084	6164058733845269	7983084852861198	4317335304387961	371748488469016	4547127284711199	2884488135958819	7999280327844275	9822894713252454	6128413476974847
ENSG00000131981	LGALS3	-482611378218317	48746943618171	1588535216681115	-2655198654207	-96034920058471	569379278927616	456026779368155	1687387718604716	1124075511596759	11145409063075	-140049496482955	1983012230038329	2970146773242927	7333285285981	-353304362266743	-1889716559921157	-10396714816917	-376035018973594	-550597770059826	288304537115211	-1388998881835703	1988040879942775	392481453383034	38915235698091
ENSG00000173451	THAP2	243636045115923	3200577002046214	6024106941690645	722753215461596	-236602959154465	310970786807447	2752867574430168	5263139989777988	867733651399322	-247728580930736						953983038586767	283001765320212	-926444236957636				1085783518159549	3029773010238352	-86496745534557
ENSG00000174514	MFSD4A	37539102987911	878258836753518	9396380345262524	51740820965324	-442502954282713	-314485959458354	2698931192695743	5199180630502931	244212095920295	-871225664679708	-31036220959572	7755970509928078	8332325907699584	182336289907298	-244380475061906	146988379807222	202596728164702	-1732667728658081	-122017390141093	716846237545444	-960769927734961	-1098057071463459	852689319815893	-3041965700439137
ENSG00000223460	GAPDHP69	103750188683659	6720313620423675	8198449590308936	583421996743616	-376399573875284											406244979913765	2284451337925033	-1473832860147836
ENSG00000198221	AFDN-DT	-463245761887537	585441692632605	1830525222739318	1675381858	-941115610531341											-181388841428469	65601371707027	-3685039007134388
ENSG00000231731	nan	-349378668809614	1538107390984994	3763915336853064	130803002855507	-82795261659988											-1368029611258094	51217317232759	-324193717975517
ENSG00000182621	PLCB1	-626551924143648	104683721469584	455285401714549	-147031750024123	-1103196706372245	-2536118675303401	9.6412e-05	0.00564752	-2006254677740053	-305118811661707	958778399272128	0.00101639	0.00859066	1169745940803717	746945955352105	-2453331189736502	-575718570665534	-4319684903779971	3769390550325989	4598799158277921	293658162078526	-8855094994650212	-7005025406677464	-10
ENSG00000228013	IL6R-AS1	-131892281094441	5904321452391212	7892248580211404	348290528336992	-61146753174715											-516438357980847	1363768880650735	-239426663511857
ENSG00000175449	RFESD	-436589476996109	746496709752587	2199056167137392	43463930090279	-914635220820259	952164707912112	8095236654941	62903292987121	1502447530314823	396000407356072	520783369497602	1.68782e+09	6.27163e+09	733328970922757	307764904401937	-170951287475375	170187675131233	-3581352204028057	2047434436613777	2883047110129944	1209962722622183	3324571922134695	5245935742271106	1382672372237744
ENSG00000088930	XRN2	-1585567808180869	68062.1	1.57619e+07	-1114083798768413	-2049929908725815	-687418662394495	157490939697111	746758098252491	-129646904051955	-1240925724530946	-1084174023019277	1.56794e-07	1.62545e-06	-872832621331969	-1294539932017375	-6208460635675003	-4362314480534632	-8026720193580827	-4262377333886787	-3431498912952855	-5089420652854079	-2400186401320678	-452674262573702	-4332807955334381
ENSG00000174516	PELI3	1406534148137808	7.57814e+06	1.33233e+09	1873846451613511	932869465164008	1130173144552557	6.87193e+10	71293951202	1677856160103159	575535134056434	10455212767862	923497731257466	9451706796264128	223810656896231	-202909750335365	5507435157544602	7337246551119866	3652750341430537	4110415945827	879900690094145	-797729794563348	3946104988252644	5858391340182482	2009534622514766
ENSG00000136161	RCBTB2	263608268875321	2819776697593296	5588383477478414	742631006924689	-216628143409586	721160596656831	112895494286826	575691421201459	1274299540955956	163549753501813	-1229938486899899	7.06933e-15	8.97125e-14	-101925277546441	-1439521328703962	1032186420603824	290785127544522	-848230705743715	-4835443219749536	-4007142613085329	-5659407948206543	2517999513185597	4449335749421985	571049224830507
ENSG00000248445	SEMA6A-AS1	-409308235825746	947035471524009	2644405931571709	70793169090195	-887526996487488											-1602690251952849	277198238576387	-3475207047192319
ENSG00000013293	SLC7A14	1109218153921348	5.49874e+07	6.02967e+10	1580764762112211	632623805127245	113504021259365	6905630434435432	8321945839250802	671347913653211	-44504728399656	3373689609504635	3.56161e-212	4.43069e-210	3561414560834075	3183242530945076	4343262526815393	6189653794179646	2477106290288281	10	10	10	396309881045386	2344073882563172	-1553924118487534
ENSG00000182768	NGRN	313191201366295	2011167562972657	4499274519969057	791963052615085	-167022196304644						527403858857374	1.24347e+09	4.68157e+08	739931671811477	314397204232244	1226333705244222	3101016185937151	-653993304916466	2073462567879775	2909005306888929	1236037286177502
ENSG00000198542	ITGBL1	642917949545994	86138198668988	386992885789992	1119425995083992	163460018641104	1776748937799136	3.01237e+06	7.48831e+06	231208456711877	1230686877416829						2517414115707039	4383232422588067	64004521661191				6203684700982303	8072859001778421	429705806527044
ENSG00000272942	nan	448627735903486	669769472948232	2028522730823525	926594880852681	-31402210663408											1756649967322665	3628181534280755	-122958720384604
ENSG00000216895	nan	63861049801531	7944127140979762	8943115858124275	543656744067039	-416228858023238											250054782772468	212874623049513	-162978868966445
ENSG00000089220	PEBP1	-270424439801624	2697145679768177	5435428698902145	209810210247338	-749414078649199											-1058875868171844	82153435795204	-2934411119542267
ENSG00000163281	GNPDA2	454271361809287	636099075288414	1946365952927357	932201184225638	-25747105354283	235868978990179	4080228761408201	6276535321148095	79309394294137	-322825409812544	373029027166402	6085466125411	1649528296845	585923129816317	159795771302303	1778748189232733	3650133615814618	-100815549640882	1466545440600027	2303528229697005	628229287170241	823558548575934	2769161503685295	-1127175040511452
ENSG00000110074	FOXRED1	-556622470065063	229891279525278	870152633943043	-76865492295802	-1033822861411346	106405057258317	7090062589153525	8438703753736183	664279754742783	-452132819176503	-205114793150505	595384049957686	1072439669018701	8249253738972	-418292171087498	-2179514919829227	-300975070695828	-4048044180902712	-806398812927511	32431539044401	-1644495285010112	371523185846526	2319394746212568	-1578663925704491
ENSG00000226439	nan	-839428483571	9726758871866806	986392187171495	471587045066767	-48833693997191											-32868721664412	184654960228439	-191213561042212
ENSG00000157827	FMNL2	834458416916454	6427675094559	41936636931697	1309177378787306	355921583548266	-1359545153209077	1.60404e+09	2.30713e+10	-807403990026083	-1903368033499348	-37416772442135	7310974436875617	7975483375258429	175957711454606	-250757190583441	3267411337946709	5126224296040952	1393649094945836	-147102217336303	691769167221016	-985839674036337	-4746978758690153	-2819126368321566	-664578708817755
ENSG00000177627	C12orf54	129225531555529	5979668529564179	7892248580211404	608810256753578	-350954472236717	18577497820217	948051482596735	9755235644308032	576786975258958	-539747778191806						505996414437269	2383861790172403	-1374199838413472				64865067066015	2013905542880013	-1884579730271514
ENSG00000082212	ME2	604958265457684	13454206193118	558525903587479	1081779570758283	125359927064021	679433688383387	170076215150761	792613450656702	1233026032166357	121625725797432	-181234099944292	95957491697231	1617434357356676	32138764270148	-394442013107244	2368778905538817	4235823814583949	490860225877695	-712513031421513	126351985433775	-1550729551256826	2372306119499988	4305225442339961	424667570258988
ENSG00000151014	NOCT	-663609316602501	6691811313495	314218644642303	-184233785036056	-1139940849740543	435045286531599	1268290412791966	3368297428532024	990907941807912	-123524016683615	448606083091605	3.73789e+10	1193167493852	661333525834466	235471026953055	-259843338035521	-721387124698288	-4463560534022115	1763672952694782	2600000526489408	925742866700192	1519001211073556	3459847538330462	-431295630013573
ENSG00000187531	SIRT7	501566959769026	405273544478182	1376498395746194	979172096930957	21656764861203	111178670470327	696584805832174	8357920109892865	669032715103545	-447368297905104	464735518602184	1.94105e+10	6.4103e+10	677424247379109	251624583172664	1963939170443835	3834053257124235	84799383188228	1827085042330745	2663260414055032	989249785728175	388190701791934	233599015080077	-1562028155118076
ENSG00000108784	NAGLU	713347706508105	35486225699247	183101783153977	1189238321958025	234187186720882						675179816680253	527086	267020	887262093275304	462485621284794	279318937515879	465659006837654	916985021160453	2654436544145623	3488227678672538	1818239680676987
ENSG00000263033	nan	-122590675675211	6168996902106321	7922396862987814	357582051634177	-60219867849986											-480016925358469	1400150835644015	-2357973447134594
ENSG00000185875	THNSL1	-195244446039155	4255760658176939	7005756882607715	284984943232943	-674574632232395	745513727822321	88064485205961	470384186235723	1298379204444507	18802699389069	179051132600172	1000277214725449	1676142762106341	392261715838262	-34322416133152	-764500547572918	1115889079415499	-264136924856261	703930801695809	15421578188014	-134936906312111	2603030742988671	453341214131434	656513793567404
ENSG00000186594	MIR22HG	166954849625392	4956736195023214	7525782688206907	646399206704418	-313258500738392											653729601778119	2531045351103735	-1226597223146335
ENSG00000132950	ZMYM5	46878051318356	84830267983358	9240306560534868	526721870425334	-433181743209824	-275183566162298	3343696363563846	5889764623526033	283521295221419	-832174422860374	-320657197021645	32173277128663	77136392572996	-107370218220218	-533652532392357	1835560325995	2062435918295185	-169616952799819	-1260648142746017	-422120780206332	-2098028923351194	-960829098047726	989941057033375	-2905614645838787
ENSG00000196459	TRAPPC2	242021986569181	3232754135337375	6062504631500287	721146622234002	-238217059730546	1116244770038679	8.45215e+10	8574129836299	1664143703314195	561474385484884	1184284295184849	8.40772e-13	1.00625e-10	1394122072432691	973383397917913	947663019411669	2823726865284003	-932764420703114	4655955989995378	548092298472523	3826809390721996	3897472769010499	5810513017823695	1960440206898717
ENSG00000223754	nan	91395546886975	70918972505288	8428794828355983	571107352480187	-388737308192883											357869056243506	2236232028881696	-1522142580772217
ENSG00000266903	CEACAM16-AS1	-169135752524458	4900594279347813	747691265190662	311079107671639	-648571579905517											-662269160748237	1218063576086407	-2539551511127564
ENSG00000148450	MSRB2	763385171278987	18022556554731	102441752578317	1238808554673915	284465110481056	510363480958624	732178363003116	2355861225747351	1065596677552206	-4804269986631	-1335498182146722	5.51838e-20	8.28226e-19	-1125344329398669	-1544457802589513	2989116429641192	4850687625686902	1113853618578963	-5250446017122459	-4424236386967581	-6071960581170542	1781981714695711	3720630228228414	-167745569345152
ENSG00000162813	BPNT1	612981336661449	122668248246712	517921632306184	1089737572025362	133411514001608	473930516283041	962354534929295	2825107857936232	1029476017259182	-8456251738825	140944121304506	195449600136517	2934401824249169	35419804396255	-72438098944711	2400194100454347	4266984221190588	522387077204271	554114943945889	1392512347868867	-284786855704155	1654772619048628	3594511572473492	-295257919809345
ENSG00000122507	BBS9	359148853171548	1426165926711715	3561198326213357	837667229762303	-121022092135043	295908874779731	2992255461832358	5535963396951752	852769424080453	-262794550951784	125428114755679	2492845830501768	3578136149818293	338697911198934	-8795586019862	1406285814935657	3279975788446974	-473874968443947	493114520377372	1331574331313292	-345794177810186	1033193446919868	2977524014274363	-917571695447611
ENSG00000279307	NDUFAF2P1	12492810545365	6101997801195843	789372724830496	604527955689471	-355247233515712											489169382095556	2367093981536631	-1391008605141378
ENSG00000135476	ESPL1	763770708076967	1792595157835	10202727778619	1239190399370896	284852594104202	332935947786285	2427731942639897	4876762916795916	889551853717876	-225752951963217	-147303310513208	1760412880207881	269757924435047	66077893645934	-360550430941801	2990626040281313	4852182779509978	111537085222161	-579115786402513	259782018538921	-1417486447691913	1162476927239518	3105953299443542	-788237496306374
ENSG00000067141	NEO1	100764894532195	680941183515527	8256985985456807	580446501079664	-379380916742881	436410993225319	1256396174828512	3350340914434149	992262792612399	-122155918612869	899845298297372	0.115859	0.878392	1111072571406899	687805388657877	394555740809864	2272800465848826	-1485506627576403	3537697935969747	436812766596223	270407336506383	152376970342586	346457812633257	-426518787945248
ENSG00000157404	KIT	-168529640938314	4916162749578953	749164346831401	311684804230383	-647967843433313	-6156986291093777	6.16496e-124	1.08337e-120	-5798009445018383	-6492105283463265	-930379056502971	0.0103393	0.0832088	-718444776341508	-1141473598724125	-65989586589198	1220435245858412	-2537187516284417	-3657739918281299	-2824530624520375	-4487647823254831	-10	-10	-10
ENSG00000267080	ASB16-AS1	-164345098545111	502436584394623	7589407152550847	315866385083419	-643799602858982											-643510841806306	1236808673716254	-2520866323717164
ENSG00000184530	C6orf58	142430988084536	5610918054397511	7892248580211404	621968131226161	-337762241221035						-150648286366099	1664274981224546	2579122514547908	62732314032342	-363891759615815	557703794350916	2435382857446031	-1322544244414271	-592266395949545	246629035336118	-1430622718532937
ENSG00000171357	LURAP1	145000831470332	5540455815640999	7892248580211404	624528521180983	-3351947770643	-326939126107797	2513697833263542	4982683470794413	231753167388629	-883595684030301	-160558468066117	1402611199074715	2233179525160418	52820063147475	-373790855924294	567766291469137	2445408338642402	-1312491063422357	-631227792326873	207659504059398	-146954053323368	-1141538464798428	809187808331513	-3085156777221874
ENSG00000255389	nan	-142391647765658	5612000079411854	7892248580211404	337801544625061	-621928935134143											-557549753117303	1322698141103826	-2435229380948141
ENSG00000126522	ASL	1042330435620586	1.9664e+10	1832556356028	151471495949196	565195662836488	863638395546536	23937276555817	159477131209581	1415084962718963	306848546281702	481674209751253	9.53347e+09	3.27711e+11	694321091177093	268589803345332	4081356499247363	593102871523559	2213084174684693	1893678681070065	2729689531973007	1055947722030872	3015474042308755	4940901185895174	1071390330726432
ENSG00000163453	IGFBP7	-1043469039832752	1.92541e+10	179824862671	-566343102444171	-1515839653225066	102785041902665	2973629425033	26188343953307	1577070214249114	472291210407558	424827599305272	9.4501e+10	2870287721731	63761009731004	211659013265557	-408581482603375	-2217577097408879	-5935432574050805	167018900254183	2506733023415504	832127095374901	35888356445635	5506487806111279	1649048829624242
ENSG00000110660	SLC35F2	-369868661078996	1310648357244597	335681218575061	110289458043443	-848325018790365	400909506681204	1594872874925808	3886907748319451	957036807703693	-157712776346894	-168760058194317	1211008397728895	1969296082654969	44616443460493	-381982955399253	-1448260371351346	431850189729972	-3321707503295528	-663471944208427	175407373066404	-1501747373074547	1399812950589037	3341583313162247	-550668874458209
ENSG00000143786	CNIH3	-490806469606552	450360755924124	1494978360101398	-10869745374381	-968487347300567	387811119966184	1735804899135676	4078274480889778	944036549562302	-170828025343014						-1921805318299766	-42561652632239	-379221597514862				1354078711190997	3296191698835201	-596461990084094
ENSG00000081052	COL4A4	-220497586080964	3681876910619246	6525532552239375	259739627698044	-69971939923711	-816318647767353	41134883559379	25180236198125	-259230731232463	-1368352014259251	-13047161261942	230753644155146	3359733952219664	82911904702741	-343736361814652	-863381923107804	1017038341575762	-2739826277859324	-512942786431975	325964112597135	-1351382754358273	-2850252727632924	-90512828636518	-477772873579627
ENSG00000217555	CKLF	958931882617302	8.67567e+10	6987576570228	1432302025575312	481184208677785						-53600636664691	8.3153e+08	3.18426e+10	-323015338495856	-74851078734197	375480052937863	5608332042502923	1884128324673752	-2107282908008005	-1269919061026999	-294273368149076
ENSG00000100401	RANGAP1	424703562400369	829143634075193	2385535840007447	902825557274959	-55371638035189	-100505525070596	7244645386803188	8533080240950524	458020763920313	-658405396844939	295749155517165	65840714918317	148850054661578	508788540737359	82440739850666	16629723026597	3535110201091783	-216813581418966	1162723391473574	2000277351915204	324111750943591	-350924418740323	1599222234169079	-2298883877488431
ENSG00000261610	nan	123001467550375	6157198823064987	7917343784843908	602608041380495	-357171722542152											481625424959213	2359576351354152	-1398544148120237
ENSG00000129103	SUMF2	2771015633425	9909785382174492	995880023218198	482726925387792	-477197660955902	-613165240573863	31306517688759	1270558530111388	-55084503631176	-1167438264584605	-21576830712338	8429053809830456	8862957888932859	191792435461884	-23492645227652	10850208608042	1890168997243325	-1868518569937405	-848282583909	754022612944622	-923601897899439	-2140923650605407	-192332684245883	-4076219631973467
ENSG00000175115	PACS1	147528146610227	5471584288318629	7892248580211404	627046477776077	-33266973996381	246197918926732	3877944751137582	6107662725938509	803363036135271	-312500894551502	333910220893104	21547558840883	53452833439714	546881041908589	120635728946551	577662264683923	2455267667472316	-1302604010114938	1312751760205742	215003616381806	474273489127442	85962300613578	2805017000759001	-1091126032119009
ENSG00000231742	LINC01273	137931598813273	5735319436486918	7892248580211404	617485141416685	-342257312216138											540085953580509	241782923052534	-1340145176511701
ENSG00000076604	TRAF4	-604757445373621	134851852880068	559537611789933	-125158401199873	-1081580371556275	-322377194700601	2580498518509489	5058042784671754	236317410957358	-879064410997573	-2169459660611205	3.71967e-76	1.53883e-73	-1965195659850508	-2371841392371157	-236799257298317	-490071129764506	-4235043828765655	-8529124926291012	-7726070962180357	-93247788415583	-1125610055626106	82512429063157	-3069335414624675
ENSG00000276790	nan	-130917702555932	5931806834637572	7892248580211404	349264089450923	-610496423616484											-512622291293892	1367580963502745	-2390464157185355
ENSG00000158352	SHROOM4	-259157486862992	2901859815826804	568288700422492	221079835068498	-738201598609497	-46574221095861	8702481517659403	937155606066414	511828156565199	-604686294306947	-103386226363847	3423091615838235	4603998278801768	109998474420147	-316676808850731	-1014758906763708	865661781402489	-2890507452606289	-406457910384295	432453641367335	-1244999440637727	-162618238697505	1787095766241827	-2111318618562065
ENSG00000014824	SLC30A9	137613648957809	5744159444193349	7892248580211404	617168343111235	-342574949570877	241658075508164	3966091468457673	6180025891611455	798849642624919	-317038940065002	67897251767627	5328704563943819	6440750333360764	281216949765789	-145484260673853	538840986855288	241658877281758	-1341388919606851	26693473632728	1105590732794347	-571964280611141	843771719236736	2789258066182478	-110697104146475
ENSG00000172738	TMEM217	9158058291362	9701908469218544	9849163455176044	489098889778181	-470824966869312	-149816982303073	5992580417413057	774040186074133	408794223353375	-707494543888302	241197406904558	267070895958863	52701154793491	45432403947677	27851303000608	35859358463117	1915119106526283	-184356560345079	948255850402327	1786152819556384	109496040403555	-523099972814494	142734317455603	-247028321479402
ENSG00000170477	KRT4	-168129206806486	492646275529966	7499910112454143	31208496223515	-647568976520649	144547219444564	6121674426399604	7828554244215934	702249827433744	-414056205927185	174341657742117	1092772206357848	1805276444899596	387557932182374	-39033298449948	-65832792314503	1222002107400269	-2535625710152021	685415730809328	1523665122598876	-153457510554039	504700104083669	2451970797919616	-1445715877696867
ENSG00000175264	CHST1	211115013868232	388923962561193	6685864544543745	69037780293968	-269120007986656	284239690496663	3186986336276834	573276002909479	84117419344275	-274465134509014	-675345887482347	521971	2.64504e+06	-462652095835802	-887427611196127	826643456330431	2703248256668606	-1053768225639393	-2655089443410535	-1818894167261077	-3488878404311678	992449401168821	2937038184576565	-958320626894958
ENSG00000167900	TK1	3287587867187	179607507212562	4175069159777274	807447031186559	-151442507130628	-53018340616167	8524884798276602	9271949946068856	505400547863089	-611106759548658	-622122057538061	1.05627e+07	4.78558e+08	-409304916732635	-834374976354908	1287290253651827	3161645363036126	-592989362698502	-2445842549867194	-1609162332511062	-328030455597279	-185118483289712	1764653170711941	-2133736272033427
ENSG00000087157	PGS1	230679721490939	3464783769605834	6316858380259109	709856115943031	-249558914031847	1182376334351434	3.09662e+10	345084429266	1729231246000413	628254043883318	-242206322547461	260782487224187	516390834751179	-28860800277372	-455331456524166	903251165251708	2779517678201202	-97717466642195	-952222353082531	-113464829748938	-1790113430581387	4128377296403803	6037772246292513	2193607615264448
ENSG00000072201	LNX1	-69804654782364	43311648706316	216741073987603	-21881733483252	-1174075302277198	-1275647424699358	6.84746e+09	8.76852e+10	-722523613796582	-1820948748374469	-182936314519189	928765130771865	1572420551570347	3043600180695	-396142131547396	-2733276048915299	-856802719317096	-4597217640202442	-719205205064677	119657657794457	-1557413484048396	-4454042011280232	-2522758614709262	-63580124637962
ENSG00000250988	SNHG21	218347724517278	3728773107202554	6558834651642073	6975790008553	-261889061710248											854963909812234	2731445318666305	-1025454680747695
ENSG00000239665	nan	-107876305337583	6597922655246735	814622737072717	372278777758768	-587534430145052											-422401231757375	1457697441438506	-2300554011527459
ENSG00000095059	DHPS	373896292402321	1269169068276235	3281009989612924	852329065539206	-106256721745388						92618350825753	0.0144797	0.115739	1137296522897358	71423447682551	1464030993330966	3337385777346831	-416059578674834	3641245324825911	44712258532132	28079780371637
ENSG00000128789	PSMG2	-41911806600667	870462227278371	2476178178430099	60966905500053	-897275428767892	-343348553478386	2283409731801636	4705941584020642	215333497265799	-89989292755296	99020325284323	3630816992587862	4819897961528863	312314779215993	-114364273215443	-1641101693082446	23872245067227	-3513378078264065	389293583063916	1227850333713848	-449617566562257	-1198833511591534	751856998013228	-3142060123642297
ENSG00000168781	PPIP5K1	380660573736965	1201810862573919	3158129681019806	859053389632361	-99483515308249	1341249817118731	2.21814e+09	3.0993e+11	1885401630752465	788887540708504	134606487707968	2163083154573289	3187426086547977	347867018084502	-7877657342387	1490517261643231	33637155887989	-389538363167486	529198846327968	1367622228174159	-30970625921112	4683098885631891	6583055716580059	2754474457798817
ENSG00000267416	HEATR6-DT	-134724344485265	5824784937192666	7892248580211404	345461369794938	-614289458827508											-527527605623835	1352691007254341	-2405316192951892
ENSG00000183793	NPIPA5	209316998469161	3929773060492191	6728481500316803	688587543931347	-270917506778914											81960313439032	2696238305707474	-1060806524750177
ENSG00000089682	RBM41	-583215481910676	171964583072248	686742300320233	-103542991023498	-1060210056366326	-72126802580277	800296911436303	8985934798860877	486338324720686	-630142365763412	-193107671606447	760846450097598	1326525122480663	20261113020625	-406300706207099	-2283642706970005	-405433675275593	-4151366069956345	-759193399748462	79655578407909	-1597351425241205	-251837461207262	1698095639954827	-2200200867304086
ENSG00000266967	AARSD1	12258286798551	6169221237366793	7922396862987814	60219089795463	-357589850512342	-236634975112982	4065015258242782	6265719830386887	32205978275528	-793855541422149	139684405364502	1994736523304489	2983659668431312	352939655052407	-73697995678878	479986353512904	2357942981576114	-1400181372987067	549162432120476	1387565053196679	-289740078313009	-826233095512166	1124501782201986	-2771820695844067
ENSG00000266916	ZNF793-AS1	763919366719378	1788882895129	101896775753487	1239337634004668	285002003804932											299120812912343	4852759292493696	1115955881913046
ENSG00000164902	PHAX	109532430462566	6549050156972147	8127630127389024	589185017352553	-370624742244376	138680433817038	6266819829857067	7921037310458664	696410563036185	-419913965331756	-18625992812809	870898858987058	1489872975402517	27111282768197	-399461616822871	428885967126723	2307017062587556	-1451220888163315	-732271829990559	106586686924986	-157046387863261	484215674647899	2431582461426223	-1466168791232972
ENSG00000115380	EFEMP1	-1034479648356465	2.27245e+09	2091528515035	-557284297716677	-1506959753403452	95640147356406	7372983334656404	8612998787084555	653560489518198	-462876293426567	-10613102742407	3296467370957902	4461204022674583	107253696014059	-319419134373731	-4050615900556554	-2182106376909427	-5900662374878762	-417248961983688	42166267883157	-1255780759783174	333936498473204	2281967431489138	-1616175768499274
ENSG00000118960	HS1BP3	64027753741402	7938881156320778	8940800447884124	543822961938124	-416062435971773	-885342093631722	18509199551999	127747028327923	-328697413757736	-1436511300249708	274829773521901	115736458057662	248207421584145	487904114017923	61505402199879	25070752991022	2129397074378471	-1629137046290954	1080479860672848	1918171246077838	241805491260782	-3091254529298993	-1147677690190263	-5015713242629659
ENSG00000134297	PLEKHA8P1	197413774523566	4204504782252119	6955939429663842	676734890203216	-282816527400746											772994785682334	2649827970104221	-1107398414893611
ENSG00000266074	BAHCC1	-462520020437469	589409889963278	1839194552323839	17481116215658	-940394747515274						-92976758949093	3931078952752146	5128693478609059	12040756371295	-306276437908215	-1811046695878718	68449183524412	-3682216390759437	-365533596552352	473376468631255	-1204110889143068
ENSG00000276121	nan	97136601399511	6918301374806098	8314237861123762	576830002178741	-383004292456203											380348770302054	2258639676919147	-1499694343401833
ENSG00000131269	ABCB7	-519058730712588	340150028045351	1193712099399173	-39194044360401	-996538398117502	81558813088218	7748443006486327	8842597546058012	63953691797613	-476927637999418	-16607876059131	8787613106200662	9124922732249864	196759532780532	-229960164241277	-2032430073696937	-153468480066852	-390205287010051	-65293055335621	773550513979601	-904077178522726	284770205976536	2233002822940435	-1665237349176398
ENSG00000065154	OAT	617329248948789	116629046685442	497394015537501	1094049965899177	137775139560885	1933555172847589	6524.68	1.92083e+06	2465213855211082	1390293320017596	1041525274984983	7.91821e-07	7.70663e-06	125210328420355	830009287272733	2417218816864482	428386986144701	539473320614245	4094705859492135	492258304013942	3263141062109657	6751188301909568	8607524199320237	4854338852148009
ENSG00000275645	nan	1151894462419967	2.34465e+07	2.76846e+10	1622884417010973	675667668955992											4510366185216216	6354577815768605	2645649150965261
ENSG00000009694	TENM1	873460550351002	3526317280144	24697982199178	1347772637849786	395154820697364	558122886869975	500602389482682	1799285964086198	1112924502182209	-14686818476	1032122876921	9244751594785888	9460580287445992	223676739827116	-203043679277746	3420128370221442	5277348168118048	1547271038576071	40577407897328	879374201663416	-798256329673243	1948738136763569	3885879743982516	-5128039710
ENSG00000277543	nan	163426208733692	504829364391805	7607942076066269	642884270385379	-316784602056362											639912830296938	251728224134516	-1240404050654479
ENSG00000215162	LINC00269	-109893467436144	6538415387704457	8121458056737604	370264157315194	-58954484357255											-430299646079409	1449808979238895	-2308426000704872
ENSG00000119688	ABCD4	-851379660063642	4968757568952	33472671805611	-372941280694459	-1325923865122716	723967503034397	109747377545159	563524341253083	1277075260344172	166370623798254	62290649668272	5672320836935892	671137457859361	275614456251289	-151089867456429	-3333668278484958	-1460291542665862	-5191796957558688	244892653413449	108356480258164	-594002450485563	252780008870932	4459027432662402	580898556679926
ENSG00000166169	POLL	-859053584217765	4414481319915	30153721594361	-380660769484976	-1333517642762019	-143695017451392	6142665775794465	7842129464649092	414907120622134	-701401646866598	-115936605517139	2869217415646954	4007965020354534	97447936218948	-329215606544206	-3363716350718898	-1490518028115541	-52215312075267	-455799114378191	383111812084344	-1294295112686779	-501724561307357	1448686925751318	-2449009296327505
ENSG00000185896	LAMP1	618107403476077	115576439762823	493686985952385	1094821744692691	138556125595214	752731983907	9789388235696172	9902961264866448	565772841966475	-55076512224564	-72516224335075	252065	1.40598e+06	-512594898222451	-937072832259355	2420265764290012	4286891844003831	54253135510897	-2850940018689023	-2015241860863633	-3684056171443938	26282339576284	1975448668784005	-1923047815040368
ENSG00000271384	nan	-264881636329759	279658497792885	5565005143643503	215354480669636	-743898224598534											-1037172427304287	843243542821192	-2912813202020864
ENSG00000236939	BAALC-AS2	58325356673199	171891767454545	686578819671467	1060247841612959	103581201738702											2283791832168388	4151514022137967	405583293424991
ENSG00000275111	ZNF2	197186085269671	4209867447494073	6961068346770045	676508155086942	-283044122987105	241461875249779	3969927958734019	6184738421800237	798654580312623	-317235057430138	-255626765840871	188550379875942	385190523939924	-42289394009274	-468731553396324	772103244013363	2648940164463334	-110828958979731	-100498417184041	-166258691558534	-1842795258375704	843086667727557	2788576987918247	-1107655803544415
ENSG00000144339	TMEFF2	2079016495785535	0.000738291	0.346418	2533696346831439	1615171144672017	-5922335385294	9834287816274164	992289674319965	552365224672843	-564172979809558	5535660368463	6111427970668611	7089930721866489	268685306244306	-158022496945967	8140611841641966	99209595142475	6324375671501064	217631789562002	105632318702382	-621257745459473	-20678386598246	1928634721967095	-1969862600783401
ENSG00000269947	nan	183653511582603	4535730000903085	7209027807438937	663031400777483	-296570235433756											719115001818962	2596170489022625	-116125253231258
ENSG00000100003	SEC14L2	-329141750375991	1791007904034304	4167794406179018	151059216330877	-807827908996405	-267655488941312	3477675342058771	599261900913345	29104870465322	-824692499164923	-515919289900513	2.10773e+09	7.7585e+09	-30289226717263	-728477841795484	-1288789788883886	59148854650509	-3163136730909029	-2028311544730502	-1190806186824902	-2863975132387604	-934544114001812	1016223709431039	-2879490811133766
ENSG00000160785	SLC25A44	415138926700626	900898223819369	2543608422443336	89332130459353	-64952822418769	-30532808768094	2840975172831691	537002133239616	253373097623753	-862127842545055	-42471934893489	6964645998909711	769613859444139	170903988873497	-255809190635096	1625520946792078	3497895281401997	-25432973543123	-166976342148629	671900703188385	-1005701366028367	-106608150765112	884675812057061	-3010199805557603
ENSG00000188766	SPRED3	929689077411002	142074800485	10869857826095	1403389263624366	451742493561193	1373641915332762	1.24589e+09	1.84222e+11	1917208864477568	821673722313778	582104779224009	8.67235e+07	3.63198e+08	794478488535681	369202885566435	3640297192426853	549512102527936	176884613465639	2288516570432044	3123453458481277	1451503151368153	4796198918983829	6694113640996445	286895047008236
ENSG00000245958	SEPTIN7P14	-107876305337583	6597922655246735	814622737072717	372278777758768	-587534430145052											-422401231757375	1457697441438506	-2300554011527459
ENSG00000214087	ARL16	39353884705741	1081329528139794	2915812451176505	871854385113905	-86587031778519						423380270841654	9.98416e+09	3019521828732	63616604225566	210209722010867	1540943520648311	3413839258145972	-339040800136851	1664498901223192	2501055791345755	826429277438822
ENSG00000138623	SEMA7A	-163496312214965	504646604491012	7607169735385234	316714550192552	-642954102756279	-112683197333231	6926864528832998	8334158961337078	445866583936153	-670530680218794	-227270002893281	368174848025677	702051887993694	-13916314236422	-440416879604517	-640187327988971	1240129755076153	-251755567747548	-893500940289067	-5471131120388	-1731477498289093	-393443897717958	1556784780673754	-2341220435772595
ENSG00000104356	POP1	-273697058093701	2639585259298234	5363395636788916	206536587143176	-752670647674907	-196719278284478	4901877743512453	6938252605361958	361947518364066	-754160339241873	-146214789201794	1792574276815331	2739021243832092	67166601131269	-359463086212294	-1071690155733132	808716135941375	-2947162564481518	-574836317916169	264062218958962	-1413211604879995	-686863715586845	1263773532919659	-263322119355692
ENSG00000141622	RNF165	734968627313483	26609316253145	143092345603995	1210660265337526	255909035059351	242357186830234	395243925258436	6169089006406046	799544695686853	-316340120615034	-609118737916595	2.12443e+08	9.39848e+07	-396273305258261	-821411652955942	287784840710599	4740469982893648	1002039245677165	-239472063249689	-1557929187099864	-3229339881802014	846212731650331	279168490880214	-1104531048149833
ENSG00000182472	CAPN12	-871633998291834	3628867266738	25350280351527	-393317116346565	-1345965461740407	206698222367053	468438561152193	6752999892422445	764085816186212	-351977233115386	133735770820888	2192947714586746	3222447024842542	346997195647175	-79647392441385	-3412976309931213	-1540075310293069	-5270271976435219	525775665321115	136420256365292	-3131298417388	72170612996516	2667876922433179	-1228961351667826
ENSG00000269939	PCF11-AS1	-151537737741064	5363195012686333	7843805955747146	328663637169834	-631041096311875											-593362248356972	1286917685398619	-2470909024345279
ENSG00000043514	TRIT1	-162715139947885	5066850892515277	7620385016002215	317495144613338	-642175948853911	666113296319887	193036745776333	874694134367	1219846343816885	108246535926	-551724956815225	3.9238e+08	1.55517e+10	-338763299624843	-764185822447051	-637128564279955	1243186256166092	-251450873249689	-2169079779203553	-1331831402723025	-3004359318077876	2325796727712884	4259207330699149	377952880439191
ENSG00000183621	ZNF438	62525437878073	7986190682208305	8970875122449291	542325016868714	-417562201873583	-174287988269673	540992049661061	7323411327827161	384355285450202	-731845203013371	-10710422192441	3252309427381649	4415312483453491	10628050182416	-320391443438178	244825051184488	2123531709964631	-1635009540369147	-421075028732788	417836613302953	-1259603345484214	-60854277348429	1342012342521893	-2555305813237303
ENSG00000145220	LYAR	-257541784308509	2932050728602758	5714712809223311	222695820726724	-736593608276477	-72616148475729	7989709175216888	8978077125213632	485850109517939	-630629792593419	-970213808389573	0.000391606	0.0338606	-758423347738015	-1181129245674639	-1008432450300155	87198934638908	-2884211194172186	-3814348303962421	-2981704429595592	-4643552066608467	-253546058061056	1696390991020115	-2201902763561814
ENSG00000106125	MINDY4	11694226444665	6332212902629475	7984224121306543	596569752422667	-363223935395148	19492423000774	9454969477388908	9744922683397252	577698855126971	-538835510632858	77606479778729	475962112611646	5916452550337574	290918745746457	-135776439028059	45789996600442	2335932783978427	-1422242235999343	305106093070186	1143732870871804	-533798452924904	68059613703648	2017089456524747	-1881394462967706
ENSG00000196570	PFN3	682674176847585	52715963998776	256227424202582	1158839477824311	20337823172636											2673083883314178	453756013714281	796349256910657
ENSG00000114739	ACVR2B	-912234596618461	1894405651139	1413714986438	-434173243174557	-1386127928399695	104912288725572	7129066982821526	8458246441057271	662793392649257	-453622692392719	-1550679126697128	9.42902e-32	1.87361e-30	-1341757944095492	-17582224216831	-3571952302755458	-170005185234254	-5427532417773187	-6096419413701147	-5275055966152282	-6912365763240882	366311045227397	2314204974273744	-1583865957055804
ENSG00000123178	SPRYD7	724281060515047	30706994221261	162211561084944	1200071610015796	245171012743674	488789276492322	862320871603247	261373494915433	1044209177216371	-69670134053339	314574426270508	3849387843627	90885843171943	527580762738906	101281967698127	2836000094207052	469900896847944	959993368794506	1236734025983957	2074158056868544	398185119991824	170665336675858	3645953775183773	-243259773818954
ENSG00000171467	ZNF318	-100136215928542	6828232527032632	8261019232580089	380008752342696	-579819875093714	634613755930259	258357643844368	1095024188056512	1188671763147359	76615897411599	244457845754684	247208902773938	491883900371888	457579619794191	31113637154216	-39209408237865	1487964985135768	-2270346844662152	961074106842929	179895197491244	122321748137429	2215813143287519	4150358373457818	267511554678694
ENSG00000117600	PLPPR4	126072916822576	606930156713148	789372724830496	605668755080239	-354103682144927						137815200410009	2055556661802427	3058833159021134	351072406723542	-75567456417218	493652013669292	2371560903780033	-1386530907225364	541813743938267	1380224057392769	-297089772096947
ENSG00000151062	CACNA2D4	-390015819668812	1113298314702973	2981114733775696	90115199528887	-868352655079314	-6999886266648	8060696861366844	901045260057374	488461316740002	-628022740022971	170891169625572	1164735378445115	1902749121402174	384111553856513	-42484757655117	-1527148729439974	352855718982453	-3400127859009115	671850304939919	1510115854171249	-167026754211047	-244407560444702	1705508264682129	-2192799996253576
ENSG00000155100	OTUD6B	-113337374008597	6437326329436135	8051143853488155	366824499913695	-592977138202187	50492854991662	8594402153076605	9310509304098126	608590599195634	-507919617930639	-7153528162344	5111511354983891	6246766874022016	141846804906245	-284852241935573	-443784631254876	1436340632147568	-2321865518074103	-281237473404707	557663800533514	-1119882706792573	176300514584072	2124950863383284	-1773448738901851
ENSG00000162194	LBHD1	107794568849167	6600338492124556	814622737072717	587452966296173	-372360410435168						3129860559133	9770663311325204	9832469164562324	216488851608725	-210231980082741	422081183779477	2300235031098879	-1458017082929333	12304894253343	851115369437146	-826516783963639
ENSG00000213753	CENPBD2P	212015748041753	3869029902718868	6664051264783769	691274639865007	-268219520936872											830170377494357	2706759917739665	-1050242272114937
ENSG00000125257	ABCC4	902953307991256	2203107788687	161829237534	1376948170744199	424832130719891	-856018000171226	26164657844517	172306603764197	-29917844230495	-140756072581983	-623195327896321	99644.4	4.52382e+08	-410380554596604	-83544491340504	353561042270906	5391588093124864	1663475725690004	-2450062059974474	-1613391150351655	-3284510961341615	-2988866720813009	-1044609447010548	-4914629610691342
ENSG00000205089	CCNI2	-7392864905838	9759345400847648	9877554375498896	472586233796724	-487337902652279	225854526949238	4282223968312059	6442795479194481	783136386137299	-332834433598724						-28947554633704	1850462032812773	-1908223772757091				788592154847812	2734393764985479	-1162122480981577
ENSG00000177098	SCN4B	629468023448873	101139848016442	441656307122895	1106088628038913	149958750292617	352603823353716	2160342594778153	4572698430975604	909083608901359	-206071120735375	-154299558431026	1563898453939504	2448533349321388	59080328389779	-3675389961072	24647494890062	4331008532915431	587179553824876	-606621194126739	232271431763224	-1444961651049426	1231149149950755	317415024513312	-71951654610464
ENSG00000212126	TAS2R50	132031599880385	5900397127050364	7892248580211404	611606353686665	-348151354250265	177684979165774	5331327939750412	7267389867151869	735224962347237	-380962217815334						516983875614266	2394810207296562	-1363223929602604				620403684164007	2567106558309637	-1330165130274842
ENSG00000187726	DNAJB13	-404193452560569	989047687316607	273512070386977	75916152918809	-882443862311669	537206571827133	593122279664098	202379033616106	1092200295751979	-21126083991307	9782823277782	9284040222710392	9490340288998268	223138602515435	-203581862757232	-1582662770064015	297257830649993	-345530349070385	38460692947165	877258541048859	-800372171794276	1875706871134709	3813519243499835	-73763693485519
ENSG00000121570	DPPA4	126007793275784	6071159421478098	789372724830496	605603860094252	-354168734352986											493397015444285	2371306800509347	-1386785626115918
ENSG00000250538	NPY2R-AS1	-150977979254572	5378261628715353	7854516768361688	329222917934554	-630483437299836											-591170454028821	1289107609155988	-2468725450734292
ENSG00000144744	UBA3	-27229311339095	9115308023634912	9550785157140604	452792194211683	-507125364844473	555426273962866	511806362633589	1824619572572905	1110252927593336	-2851866470181	-75139579432005	4697.48	27641.9	-538899310906889	-963212027500087	-106619285982644	1772956350021627	-1985703701061823	-2954075945823223	-2118656377377427	-3786821143629733	1939322661183195	3876551692026535	-9957557882219
ENSG00000226334	nan	928564771739394	1447542203307	11063064738339	1402277485910907	450610706070525											3635894853108011	5490767740522936	1764414499473393
ENSG00000109586	GALNT7	-1369330737461329	1.87893e+07	3.10325e+08	-895252248548686	-1837218369086191	-91965046344163	7470413828526012	8676033499841633	466543780558304	-649900676574915	-25962777854342	8115222583299619	8608900248257734	187408040219216	-239309958184695	-5361761216949925	-3505456099345845	-7193825369535697	-102071395828967	736785576723162	-940835437745682	-321104540373115	1628981142025142	-226918885310832
ENSG00000124664	SPDEF	-453446071458036	640933854448416	195965253027478	26574093551694	-931381370618472	-763773190349408	72772550480361	401470397421842	-206383895519296	-1316429349907639	-383674284957678	4223798733888	11709573859719	-170453382916113	-59654638337882	-1775516676438195	104053710533972	-3646923547798341	-1508396752805937	-670129167827374	-2345293033349877	-2666785360153527	-720608628447048	-4596435908419469
ENSG00000100911	PSME2	1735577606821995	840.742	247027	2197236694244783	1266162561335288	934889094635815	1007637267768	76147778306849	1485405764121858	378595763745614	508459068254707	2.95231e+09	1.07133e+11	721037287338263	295419117091177	6795840074777947	8603515695194599	4957795169564177	1998982046906618	2834722955157155	1161425861486344	3264252506429849	5186432825477486	1321902435081629
ENSG00000185565	LSAMP	1593632213685231	543058	1.27267e+07	2057854356631622	1122253817238765	1504112536055205	1.0639e+08	1.9228e+08	2045208223137074	953852738620282	-99007753361637	3631426318912419	4820344599007204	114376844726126	-312302218324091	6240037679473208	8057749218406393	4394305063216878	-389244157162573	44966699084383	-1227800951179495	5251749265171787	7141035345103464	3330465838858819
ENSG00000113407	TARS1	680837841375704	53954618471209	261343395768997	1157019303938216	201534077472962	-178913134659773	5303055967039383	7242680311293997	379735449038787	-736446856385081	-372305184489459	6236409320543	16886292251287	-159071106198594	-58520076584672	2665893515023245	4530433051272626	789128273342966	-1463699688392361	-625380301631825	-2300688290955204	-624691903667876	1325881752624348	-2571372915355097
ENSG00000223478	ZDHHC12-DT	1224164409425474	5.15883e+08	6.89241e+09	169417258089368	748600502715312											4793346905946657	6633714259490379	2931225475804037
ENSG00000130816	DNMT1	987785085179922	5.25951e+10	450393769655	1460821664998114	510241809776105	454060763022057	1110372178890564	3102689271732478	1009770411789683	-104473362043907	-30570620668481	49739443156643	115156915250603	-92406042352334	-518728299725321	3867778335435821	5720003746347148	1997906475097381	-1201869052878677	-363289852066274	-2039355029958624	1585395521533574	3525707612288689	-36477849176305
ENSG00000219932	RPL12P8	103750188683659	6720313620423675	8198449590308936	583421996743616	-376399573875284											406244979913765	2284451337925033	-1473832860147836
ENSG00000185862	EVI2B	-136140406818926	5785204059880884	7892248580211404	344046731055177	-615700424145737	56326804450064	8433988563446548	9222016534491022	614402899667912	-502100381092171	24494791226453	821995242614823	8694417077295281	237842797777189	-188875516559412	-533072349412675	1347151837699944	-2410840978830698	96300077944282	935067368106166	-742554888436652	196670293471472	2145245052815612	-1753130330499753
ENSG00000131409	LRRC4B	2378108552273631	4.45866e-08	3.01022e-05	2825816936446172	192006185678227	562547280937369	482664774662735	1753853471794207	1117307641601545	4291460955265	-94481533078554	3854945362192691	5051369063311504	118902872838196	-307779925626401	9311738834488686	10	7518207921722618	-371449542706616	467460849788815	-1210021777834098	1964186321480656	3901183884246525	14984036352383
ENSG00000248734	nan	-147571569235229	5470404691897526	7892248580211404	332626355942876	-627089739075459											-577832290624555	130243413533267	-2455437061725198
ENSG00000070961	ATP2B1	26382973293334	2815733862037687	5584520746322773	742851402524221	-216406629115305	2895301397473635	1.41761e-10	1.27001e-07	3398636565080596	2375427509701459	525392614918273	1.36493e+09	5.11923e+09	737925851550668	312382352543819	1033053586851356	2908714258029068	-847363342790716	2065555460351901	2901119522287935	1228115994958985	10	10	829402679620085
ENSG00000049192	ADAMTS6	-370283665433444	1306326438855719	3348131918795147	109873934893731	-848737600147556	-40685546959702	8865346065739561	945512749168162	51770133852957	-598818831732583	14513914675324	8939505429911376	923379507773269	227867295056861	-198852679923082	-1449885365366064	430223164316812	-332332300980488	5706074820515	895849165320932	-781779619960253	-142057383491473	180760252908452	-2090831825503246
ENSG00000182578	CSF1R	843522790878086	5602883555556	37163320953498	1318148475918295	365038352158173	-640174564840062	24560020413875	1052671043817963	-8219903838406	-1194175999009829	-123125836627912	2580804961941754	3681951191463502	90258311132006	-336397901023204	3302903865379134	516135158804902	142934677923731	-484063226120414	354846151444013	-1322531953399238	-2235229226463324	-287005612335027	-416957692656015
ENSG00000039650	PNKP	-89087199594785	7162129706544511	8471128974125385	391042334182217	-56880631648759	22697982385962	4259240690431016	6426591342906508	784255345339483	-331709802530539	112778977184338	3002521164928594	4151172918405229	326060955269842	-100605667863818	-348830475097317	1531168157001219	-2227222075912419	443385052475944	1281892754944689	-395526280152956	792521234009467	2738300715447602	-1158195726670081
ENSG00000272085	nan	-197668568946744	4198508474412797	6950290316174359	282561837205359	-676988616316863											-773992460545767	1106401148145261	-2650821461887223
ENSG00000223572	CKMT1A	139756710040348	9.45314e+06	1.63528e+08	1865019262310034	923801441724812	2297773062785714	0.230406	102.805	2819869743595573	1762107662236099	903853547417657	0.0847531	0.646723	1115063622009847	691827275974557	5472323721383026	730268274562916	3617243524077693	3553456172042675	4383818286902423	2719885219041223	8022889049023588	9845838325799756	615256332120774
ENSG00000147905	ZCCHC7	-628999835574733	10170153680624	44383910804377	-149488806700384	-1105624327390793	-341464807466663	2309056695541051	4733524785502092	217218572255179	-898022211286948	409629713959459	1669085830663	4899368760164	622446140396831	196440964218072	-2462916249221877	-585339439338247	-4329190513981079	161043925697921	2447116665832153	772298077201844	-1192256236623277	758438913230978	-3135528343246968
ENSG00000198863	RUNDC1	534753837018216	289537940523194	1052629747644839	1012118446572912	54932497758486	530294789896839	626648509713715	2106812703012108	1085350935198554	-28057571223781	259754867322299	170176806765591	351417930806545	472853242116196	46420157291829	2093885944059884	3963058219123268	21509408061466	1021213601630124	1858999476705889	182498586089655	1851573739601446	3789604062028316	-97965627920003
ENSG00000106588	PSMA2	-55658318456044	820336001327086	9087792017170644	424417389905967	-535477601466367						-1620861526538693	5.45484e-36	1.2e-33	-1412385510455137	-182790057633041	-21793610932267	1661851763596444	-2096719921303028	-6372338098313598	-5552724801235213	-7186302032446689
ENSG00000183454	GRIN2A	963320989839134	8.04681e+09	6547187272193	1436640898717065	485603887283832	99376737619594	7274353048658047	8550430455566446	657281382041923	-459147290059107						3771986548968524	5625321365170028	1901434049794054				346983152030399	2294959274924275	-1603155605296431
ENSG00000178852	EFCAB13	-300930048716368	2193350381284349	4763354559011901	17929124068468	-779766122776945											-1178323848344812	702034062730663	-3053257800338327
ENSG00000149231	CCDC82	446894384136971	680400260874465	204862021787409	924872931284693	-33139026520485	1017848612196194	3407937353197	29535026112969	1567212481268499	462205723114375	376961358846413	5323158175279	14531539045946	589847389349226	163732610021081	1749862842764093	3621439056252182	-129759408960926	1482005210956383	2318956264800427	643706776729856	3553913402767684	5472068611605407	1613834409684769
ENSG00000176020	AMIGO3	-183824091383605	4531535939329686	7209018283745269	296399748021654	-663201287853166	717789636878266	116781838801041	591794007480585	1270965920743233	16016214103713	200774309653153	651374361279019	1161102733803619	413957418232307	-1259152095081	-719782925306244	1160584970583935	-25968357000697	789334413592706	1627453415415678	-49502950965777	2506229492581664	4437696103396266	559221059819167
ENSG00000226286	nan	-184193366313562	4522464036596301	7202840016538588	296030672140077	-663569062203913											-721228860859773	1159139814425665	-2598275759944555
ENSG00000278330	nan	-88676733376811	7174643670096486	8480619246633944	391452204461153	-568397145014879											-347223250642193	1532773047993189	-2225619921171095
ENSG00000013561	RNF14	926358356891046	1501512298345	11420673613535	1400095622065295	448389644050891	701140728210984	137765704258242	673930945134807	1254499596317548	14343286334789	252160308257444	20529593536187	416175430131678	465270424697463	3882075748912	3627255399367049	5482224418863658	1755717693163916	991355962790232	1829187999575492	152621916124805	2448098274495665	4380202395226348	500809225793939
ENSG00000223784	LINP1	-293641563550204	2307100979564003	4925160166258627	186583731697636	-772515134693232											-1149785003765377	730588592632412	-3024865779602785
ENSG00000189343	RPS2P46	-93289926467062	7034443484346165	8391067681881201	386845616114845	-572995693858977											-365286702459148	1514735457758795	-2243626031873208
ENSG00000134697	GNL2	-517278655414762	3463409806301	1212080874200597	-3740920289869	-994771224373383	-5274995537175	853226712765588	927526255204847	505668254695718	-610839368676173	-268711511353895	135624664180547	2865458309711	-55382826923695	-481795723013752	-2025459998145409	-146479742089972	-3895133311964836	-1056426211135054	-217734884948387	-1894156404539587	-184181391166375	1765587894097219	-2132802651852473
ENSG00000100644	HIF1A	606195415856939	132647415253184	552043938610207	1083006727282611	126601434008883	427507374279559	1335520563132131	3485260139907875	983429576977714	-131074751721045	-56454948366864	604087679865595	7027004388796085	156924390309152	-269782889073902	2373623100479301	4240628877436382	495721479339277	-221949878151979	61694059273346	-1060638280427281	1492681887099032	3433736129735543	-457659725939753
ENSG00000272913	nan	-50492002871322	8367663859128773	917635197994075	4295744312514	-530325812279609											-197706847115322	1682044711526184	-2076547538763312
ENSG00000116830	TTF2	-61177461199085	124392705132128	524788577949196	-132200460633935	-108854067336162	-3424922837801	2295042514056197	4716111288913739	216190375984531	-899042585483506	-119176868370182	2736638863526643	3858832658781205	9420752310605	-332452770251277	-2395469040714324	-517645067987065	-4262297636233203	-468538049869546	370372285853692	-1307021864036784	-1195843766043268	754848870013208	-3139091074963192
ENSG00000186298	PPP1CC	648291395045138	80723121271969	366315605316985	1124753991659459	168854464971854	1601804340672071	1.45706e+06	2.96143e+08	2140928636750797	1052950932529869	-1512419359833202	1.58931e-29	3.01196e-27	-1303264433026796	-1720228782482563	253845441728686	440409476403769	661167749197979	-5946003004879211	-5123720603380901	-6762995622357731	5592849316405655	7475252100703563	3676476429535408
ENSG00000111602	TIMELESS	491025117353565	449404205587697	1493183951826943	968704466997265	11088921067553	15922173712371	9554682581652584	978477536096138	574140436607181	-542395336492333	-899524362696087	1.18789	0.900218	-687483364043113	-1110753009923815	1922661456979806	3793066130583931	4341985854203	-3536436193294207	-2702807340984872	-4366871325565429	55593755180837	2004664906234452	-1893823927115827
ENSG00000164880	INTS1	-13005626973904	5956149872874891	7892248580211404	350124615375361	-609638050743884	-395506510924424	1651922000436354	3957856119556215	163122960611615	-951674519190177	351191817728419	12512030939154	32379874969258	56412954971392	137934736095484	-509249258802719	1370950444959347	-2387103106233909	1380693515938905	2217847831642447	542283692660097	-1380947886762221	569559037631246	-3322860382473594
ENSG00000197498	RPF2	-294131643304297	2299323464824248	4913725884294486	186093398611905	-773002709019652	18033284915532	161132	4.14067e+07	233805953987424	125772121351109	-207085092394435	571318274774702	1034687033411432	6278118251691	-420259842507124	-115170396355122	728668640899396	-3026774929118135	-814144948381775	24682115940157	-1652231089301192	6296489692996128	8163553042823491	4391450972259834
ENSG00000111875	ASF1A	-938524484815935	122585156782	9531106576223	-460637124274827	-141212580372006	-247401240391128	3854782144217681	6091307262040105	311298011016742	-804559308538349	-1571757589035138	5.2795e-34	1.08824e-30	-1362967877145086	-1779151625040727	-3674893176774323	-1803674014214451	-552932988408455	-6179288361116542	-5358441784262996	-699464790624909	-86382451530808	1086926052018896	-2809193897475976
ENSG00000197496	SLC2A10	-78782538310444	1275878648103	75928705289296	-309031583493979	-1263011930157733	-88605590188431	7559831177273812	8731849842586188	469896145046274	-646555064117689	-303735998760264	52609850135768	121230498649668	-90434168107719	-516761546908989	-308481469764524	-1210046275790572	-4945458535619885	-119412327644212	-355537524573575	-2031622837111625	-309374685741683	1640686235436875	-2257507335041947
ENSG00000143416	SELENBP1	891443805793884	2651490998798	19111499879896	1365563443549972	413249603316408	-260236446863399	3613000717567973	599261900913345	298466468685055	-817318327739073	-969960899477228	0.000400003	0.00345528	-758169504242332	-1180877495109584	3490543733690832	5347009974000239	1618123098653098	-3813354004899144	-2980706456263469	-4642562321531108	-908639836331775	1042123524683944	-2853743203532192
ENSG00000226754	MAGOH-DT	112830408404074	6452166616472433	8060645356105618	592471889070046	-367330847153766											44179955311247	2319887160963217	-1438323289017709
ENSG00000248810	LINC02432	157957566387914	5191928083879498	7711624492587086	637436632150233	-322249072438797											618499775264431	2495951430158279	-1261800769917518
ENSG00000124733	MEA1	-100618457931174	6813793926990876	8258135180695141	379527157323686	-580300542927637	773386290592605	65717971664585	368695251148686	1325930778194036	216049805084899	1118976970497729	5.6768e-10	6.16733e-09	1329164088913038	907783826024536	-393982352608886	1486079248239223	-2272228951066147	4399203425764076	5225543838268556	3568907870842069	2700350396630545	4629611031839447	754358053600772
ENSG00000115163	CENPA	13156829778377	9571855756057484	978328788758219	493088022282363	-466834979777035	194246299185802	4956602949717089	69782466762575	751700439550783	-364418179685887	-615283482145717	1.52804e+08	6.84403e+07	-402451372110025	-827557524929023	51516976661532	1930738982254664	-182794238149116	-2418957023992641	-1582217955837249	-3253502077942887	678229078315409	2624632224257481	-127240007745694
ENSG00000164715	LMTK2	-115897764426349	6362594225748477	8004763032958119	364267194828152	-595528822163512	-349762634433104	2197603718879231	4613513780352511	208914593275874	-906262348239823	384506957891748	4103289217233	11389786929987	59737731480752	171287042599247	-4538101142639	142632723008738	-233185691002015	1511670365865616	2348559799766067	673406660242909	-1221228873729156	729444795798155	-3164299550287548
ENSG00000148297	MED22	138835337872898	5710227880011527	7892248580211404	618385602039879	-341354456109465	27037887739215	9244532181847932	9650490664152622	585218849771567	-531311608118822	-341774032759196	1687524334501	4269567082349	-128507304907056	-55472995455049	543624640697927	2421355080573651	-1336609946691168	-1343667953311564	-505220206392064	-2180893781350095	94405307889148	2043346219501027	-1855124055300641
ENSG00000254459	nan	-3613646415657	8827741927103724	9408307496240742	443902856924189	-516009296714817											-141496197179952	1738149197440771	-2020489688152674
ENSG00000274422	nan	460386860978987	601202848354816	1867605040389106	93827589814499	-19618820345701											180269408146559	3673919809029877	-76819593085967
ENSG00000140527	WDR93	-42137374139636	853580374073094	2439755874772692	58707320297278	-89951685675899	518679928533857	686502279186808	2253001661833449	1073839782431746	-39704338008521	315656318648011	37293154862383	88237822213234	528660709956739	10236482315553	-1649934031750963	229874802711709	-3522154629716884	1240987433139693	2078403816723835	402442313449252	1811019367394635	3749411798061876	-138631400883909
ENSG00000271862	nan	254062576802421	2997775545803959	579491352861137	733130923476639	-226175552662169											994809240536786	2870652680835434	-885614609611785
ENSG00000114503	NCBP2	-227880881801702	3523630411062931	6377178837232129	252357462193065	-707069859464855	-757000304895185	78142619801289	425648104282417	-199574429007616	-1309734532852889						-892292008571977	988132681592488	-2768607792432585				-26431371986266	-696832740744711	-4573060329993698
ENSG00000115963	RND3	-1052102692675505	1.64002e+10	155805767557	-575044161278929	-1524367429594484	-1781220710439252	271323	6.83393e+07	-1235234596133849	-2316455158449124	-665990044487514	9009.7	4.47823e+06	-453273691202698	-878102733008256	-4119620818776384	-2251647025535299	-5968823996118156	-2618307402636744	-1782023426505974	-3452218100167377	-6219298312406841	-4312936849508856	-8088119329218912
ENSG00000186496	ZNF396	107837003822701	6599084222591167	814622737072717	587495259731943	-372318029365515	-64502122983091	821029672009566	909591431141686	493945041866468	-622547243930254						422247342464966	2300400635578089	-1457851135310265				-225215180951085	1724655202635889	-2173681790738984
ENSG00000256341	nan	-236400450423143	334646058231541	6182504804739603	243838546806507	-715550892629578											-925651292322719	95477595565292	-2801816186473738
ENSG00000198198	SZT2	88953187605534	7166214521129225	8472703235702685	568672727393348	-391176151782601	-1063599950853599	1808604222331	1679575750372	-50834910431217	-1612295835513542	159631621847319	1425654074358857	2263542982522847	372865064201637	-53747120660567	348305736794937	2226698993500757	-1531692134153163	627583941587854	1465900828194848	-211304185491636	-3713658470649915	-1774948330677425	-5629481349583674
ENSG00000135837	CEP350	-350178613645071	1528698486400296	3748016964731347	130002214323878	-828748045668152	431314867695554	1301225516704145	3424561901994197	987207070727519	-127260860976989	323939512885622	2917004974887	70606868842669	536928846547191	110655556705857	-1371161880969942	509037599032984	-3245051767496771	1273552407600391	2110909592778568	435036928350461	1505976105630074	3446925601632877	-444343170540865
ENSG00000160216	AGPAT3	-916625584477672	1762958227419	13247070986147	-438592825035537	-1390470598100502	-563042117295738	4806925211425	1749517632273221	-4787869525605	-1117797850506436	-877155086555019	0.662568	48.505	-665039272094906	-1088478433809483	-3589145686182506	-1717357198647166	-5444536606274044	-3448492474320369	-2614569487311442	-4279299915131463	-1965914088798027	-1671729319455	-39028954943783
ENSG00000198768	APCDD1L	132778195669338	587938752782742	7892248580211404	612350283762815	-347405530717014	445756739144683	1177316410937465	3227165216102681	1001533696927299	-112793246884855						519907251418542	2397723145216745	-1360303577648271				1556401247334953	3496948353796366	-393828145995942
ENSG00000154928	EPHB1	-270065758544766	2703506245203383	5443662490926072	210168995370859	-749057150190478	760644926172496	7521038201756	412627564166949	1313337206657835	20323867099595	-273186354610665	120806975341944	258078996180367	-598608090391	-486263362244096	-1057471413280374	822939219544558	-2933013527919703	-1074018839315939	-235339853399022	-1911720710441669	2655862733888176	4585639401741481	709626783549589
ENSG00000198105	ZNF248	-7892117665632	7474224649896168	8667038033522352	401193121996957	-558671886201836	-120028367980021	6737726235938959	8224356858777636	438534783515832	-677843455041464	302128035373084	55062459367414	126321862951346	515156391123713	88824857066008	-309024323061951	15709146542773	-218753962829368	11878016467501	2025312245369661	349210596643445	-419090246393444	1531185115391532	-236675367140538
ENSG00000136603	SKIL	-125910219649005	6073943491204936	789372724830496	354266201017862	-605506628840794	628945155914163	271947235828363	1138358177870668	1183060482274082	70924890497399	-128661246696091	2372893652709801	3436396653149585	84722447386213	-341927820075757	-493014955454285	1387167267285126	-2370926081118768	-505825421033246	333082172919752	-1344272560651744	2196020697406334	4130766062712113	247640873022039
ENSG00000273125	LINC01990	-234644854274458	3382492162269551	6221712574873399	245594065399955	-71380329401359											-918777067502427	961649876797372	-2794973276849601
ENSG00000213347	MXD3	-379918085221636	1209065024805638	3171697130236178	100227005024142	-858315308360086	-1544218152830108	4.77592e+08	9.08458e+07	-994522530530482	-2084517045954027	-277127888955119	108962743673244	235395238716871	-63805179025609	-49019848051002	-1487609968308895	392449576809902	-3360825552496949	-1089514789499057	-250846951770683	-1927191436124736	-5391781768310986	-3472468212124885	-7278285767791333
ENSG00000233223	nan	15993610354319	5139719408577051	7667805168557545	639407603076287	-320272077829406											626246949482634	2503668977995293	-1254059635703002
ENSG00000158966	CACHD1	-490120739711762	453371847533441	1503120301774587	-10182362709102	-967806406776122	-45676799829236	8727268030349118	9383651252097972	512723241805068	-603792130546582	-217709223885638	455083459781919	847464612802826	-4350808122227	-430869519425391	-1919120269425449	-39870132157989	-3789549679567038	-855913203568545	-17104990094326	-1693942517038913	-159484808608619	1790221039875325	-2108196562360236
ENSG00000160593	JAML	15258848188916	5334970297197715	7828830908761333	632087891370198	-327613781650555	681983152414992	165965429992836	777059501385496	1235548343490306	124186671206778						597476549648889	2475007862553071	-1282806863628046				2381207811051392	4314032327679022	433609350112077
ENSG00000134508	CABLES1	221761458657329	3654479256060538	6507898109622607	700977687950445	-258475985746987	-23666139751024	4064491084917962	6265719830386887	322033372971643	-79388181201035	-110894002358078	3084035142113015	4239648310149915	102490684077396	-324177737369194	868330751595861	2744753242133415	-1012090416125808	-435974365811433	40293712952969	-1274488975547597	-82632535177761	1124409569978177	-2771912422054023
ENSG00000166747	AP1G1	499386968416613	414085653759202	1398488744709416	97700753895325	19471308658143	96705509597236	7344817377398887	8593229320557608	654621391892033	-461813110195935	482705695657657	912259	3.14195e+10	695349989368244	269622944394611	1955403180732303	3825577698444944	76241995268466	1897733917641253	2733734595067791	106000946571561	337656310143742	2285671671117922	-1612463565046162
ENSG00000177192	PUS1	266285478805645	277116740580946	5529241469234606	745295269230556	-213950294585856	-504568354868982	76545128485851	2429352905385777	53852637382554	-1059852207394826	139061950506979	201484223040996	3009401200658826	352317853414826	-74320537370229	1042669322930735	291828347996132	-837745301761219	546715281183687	1385120470362257	-292187570632761	-1761747491222862	188031508296005	-3700572874669655
ENSG00000151650	VENTX	129370608223118	5975558294131316	7892248580211404	608954819734936	-350809549956795											506564477673186	2384427842014845	-1373632379699006
ENSG00000178980	SELENOW	380771828306346	1200726836340047	3156744857697215	859163983367559	-99372110261521	-300013866877334	2925678422685473	5465179999363401	258688704471455	-856848042120024	143144073762717	1885652932785239	2852132807402281	356395662695067	-70237814503411	1490952890829808	336414863041843	-389102144770734	562763949819866	1401152178814013	-276136544654843	-1047526409856713	903235749353758	-2991764889726682
ENSG00000153485	TMEM251	5863381687811	9809122839700928	9900603552284134	485812039895024	-474112290732339	13200109114566	9630754438556696	982381439858954	571427296843453	-545109358608178	505081189781919	3.43377e+09	1.23614e+10	717668236057758	292035463143737	22958699219856	1902249093645304	-1856437472250733	1985702082312982	2821477694239783	1148123190895584	46089412647555	1995191725592107	-1903300188572919
ENSG00000186166	CENATAC	48988878432463	8415604839187308	9204986015535952	528826866284189	-431074809336274	836679773421095	32691650429542	207859937117419	1388463659446094	27971701353556	123379152105926	2571022961331455	3670070352478396	336650968068608	-90004977748292	19182120232547	2070678255116437	-1687919602672755	485059123576804	132352687415493	-353850183592236	2921345497706203	4847950421540881	976658052557782
ENSG00000110076	NRXN2	511211770925107	368168233098354	1275330565323476	988748084907523	31326303953031						231274745599732	336213234802191	648385021045928	444415885847992	17923153021148	2001704461900999	3871549064048075	122661499527239	909245391066894	1747199396442298	70464002611292
ENSG00000176124	DLEU1	613191671689943	122369845889247	516963391705906	1089946192942347	133622604972403											2401017689794375	4267801098743346	523213626517373
ENSG00000215244	LINC02649	-41606182593624	8651890081279426	932958564680652	438443701925457	-521464379225107											-162913465763146	1716773291132127	-2041849648196484
ENSG00000128165	ADM2	-747057647944904	22580102682147	123868484835812	-268056459985117	-1222636099641869						-144693194047792	1838260428298718	2794413774126248	6868844805169	-357943127287481	-2925184262644171	-1049603789487475	-4787362645241015	-568854240723701	270045285958837	-1407235960442842
ENSG00000271234	nan	-183892976778405	4529842867659812	7207761778135613	296330899857147	-663269893425294											-720052653450182	1160315388219198	-2597104332537985
ENSG00000170801	HTRA3	803666584454715	10147613601041	62317979505457	1278696602003166	324957712880457						-277075017247211	109114536663711	235651054567021	-63752268841178	-490145695305031	3146842618808587	5006873548735957	127240674177913	-1089306926956139	-250638937959189	-1926983913663828
ENSG00000148843	PDCD11	-576697445435103	184831673244675	729336706975189	-97003614757607	-1053743087748753	-478842714968104	928306000799663	2753547293668254	79639477258497	-1034346963149832	-85931216453407	4299496081902611	5491330944024989	127452587851347	-299236790154207	-2258120636786885	-37982804685707	-4126043961442795	-337834389597627	501073637689561	-1176434857077968	-1671924019104316	27806866583793	-3611518934548276
ENSG00000213269	RPS6P26	-13184102928683	5905765412901685	7892248580211404	348341726866613	-611416462669915											-516237676036866	1363969353979038	-2394066668674954
ENSG00000109775	UFSP2	-237880556655781	3316275796619014	615341016901729	242358482947528	-717024233454937	159976366527252	5747248161255558	756487003018456	717604771906559	-39864896387744	656953812636102	1.51582e+06	7.38063e+06	869096055228337	444216024404589	-93144680685987	948980607034371	-280758521033382	2582781897496948	3416808785419328	1746413650917879	558572410783704	2505584019283593	-1391920054463264
ENSG00000266402	SNHG25	160798333666987	511705294229153	7653723815413062	6402665241978	-319410508178264											62962310391442	25070321756741	-1250686067422662
ENSG00000268081	nan	-291600466398677	2339693790410006	4964989709321044	188625859087229	-770484447577873											-1141792869178977	738584761226341	-3016914406628365
ENSG00000221909	FAM200A	-220659316520285	3678363883331293	6525532552239375	259577927626788	-699880415992734	-610054122519705	321771759247927	1297595029129551	-51961793693062	-1164357913973209						-864015195971276	1016405187621702	-2740456756217814				-213006089162752	-181429451123549	-4065464300392827
ENSG00000247934	nan	-6851163852426	9776974235449516	9882488187858174	4731267239173	-486797486428917											-26826466119507	1852578379789707	-1906107715132616
ENSG00000185163	DDX51	96207795824452	6946279688670803	8334374688295437	575904195565438	-383931818925677	121475058111655	6700710805294001	819941484154474	679283693910585	-437090655831616	-227434773441394	366810525232961	699979251187239	-14081169673949	-440581415479811	376711932557748	2255014581930915	-1503326172671174	-894148727668821	-55359432322228	-1732124363064096	424141499975617	2371782399802535	-1526142808833616
ENSG00000205138	SDHAF1	691262856038877	47256552410701	233218233104783	1167352143509063	212003912957996						406430494770831	1876942272962	5456012053954	619253938099557	193237626336851	2706713776905896	4570892391705344	830124035955858	1597861682654225	2434566678073555	759704310437655
ENSG00000100883	SRP54	598811568593116	144313970581774	591679037582273	1075682312317454	119191804235751	-272070931020834	3398684621362986	5947828265285539	28663373108853	-829080946964155	219076285186895	441685947151418	82521119179148	432234685871244	5718521413226	2344710855389085	4211949345879357	466708280071443	861287738450209	1699309602388903	22482088241886	-949961042017953	100080841727815	-2894813486101496
ENSG00000135637	CCDC142	76533896592635	7548139391349676	8710978355561997	556291881682052	-403576680733652	138103857650514	6281163872926632	7930625398274822	695836670975074	-42048963369455	-43923297840565	6866334045273095	76156081440164	169453019176042	-257259625507235	299676672191867	2178220465595264	-158024773389284	-17268230484236	666196286536374	-1011403680040713	482202505163387	242957866374621	-1468178791036056
ENSG00000204962	PCDHA8	971416147538912	6.99824e+10	5821594012326	1444642928674431	493755920793448											3803684006282768	5656654170830859	1933354210435573
ENSG00000136848	DAB2IP	-467519683681746	562519930248359	1774570343893204	12470629333448	-945360701381718	-612835947299413	313977064944309	1273580619434082	-54753978274382	-1167112232906418	-348403817235574	13680680321753	3518771372798	-135143840470491	-561346973384624	-1830623412991395	48830085297729	-370166111519148	-1369732627875498	-531311422525745	-2206908268413684	-2139773892412012	-19117862412202	-4075081261947756
ENSG00000168476	REEP4	-3232468233211	8950638446778627	9465006126561424	447707107709437	-512207545168419	1674631421988772	3.04777e+06	6.70774e+07	2212218789771906	1126897435796873	-273469369405808	11991998900423	256277111754142	-60144025230382	-486545918548527	-126570757039935	1753045148989854	-2005603522641085	-1075131498190215	-236453304052404	-1912831566782055	5847131866162658	7724168321909003	393466754548277
ENSG00000261316	LINC01834	1053578815418315	1.59545e+10	1520413248862	1525825379912364	576531881188062											4125400735532309	5974532756797216	2257472352238519
ENSG00000196581	AJAP1	-133027269838045	5872386142897172	7892248580211404	347156712993147	-612598467429412	928733878211713	1088437657909	81392334844296	1479333076117847	372395389832635	-788562194074121	393.346	24613.7	-576171153630515	-100023974769932	-520882528012707	1359329305191353	-2398694934954487	-3100193835138406	-2265188810588614	-3932393821033669	324276099395497	5165229468681907	1300253251020788
ENSG00000270006	C16orf95-DT	275220391698246	2613082824582768	5330867177516253	754186475843018	-205012750697745											1077654931676502	2953097952084374	-80274939107064
ENSG00000114993	RTKN	291843013644078	2335803753393987	496137284595243	770725759860117	-188383191514537	-898557548223407	15783093164961	111422980022726	-342003869045096	-1449555338427666	-1430819517768987	5.69248e-25	9.48657e-24	-1221187124470674	-1639175873854502	1142742588905623	3017859290724451	-737634570345296	-5625197202601594	-4801037664859854	-6444340062229355	-3137397522111764	-1194138420423063	-5061257719039401
ENSG00000131400	NAPSA	-151931405301046	5352611668144328	7837215200847375	328270303781309	-631433285557778	764858545732803	71943430639241	397866541997967	131750214795863	207475161096949	-110667561196262	3093924919183667	4248615026226638	102717129190687	-323951506247137	-594903695866868	1285377546372868	-2472444683358007	-435084123419445	403827387456709	-1273599558916686	2670574979746848	4600181682915003	724418884035089
ENSG00000005001	PRSS22	-1036299107263898	2.19773e+10	2028828121331	-559117742501172	-1508757112670265	-357237535693973	2100551331384599	450802649459212	2014334901182	-913684628495599	192286541601504	773412768167193	1345872992130666	405480624476931	-21082544532065	-4057740186851181	-2189285426404182	-5907700127662717	755965167152097	1594127313886029	-82884996362373	-1247328188948585	703323826077345	-3190215134357742
ENSG00000126814	TRMT5	-99662540935392	6842425920169131	8265021146532954	380481789674497	-579347744139121	153137920469419	5911864951353774	768066151813042	710799539749101	-405478029053808	-143385946895714	18781944896668	2842798874129382	69995903609922	-35663727798886	-390239357191936	1489817213491148	-2268498165323841	-563714862254469	275185483766706	-1402102077566351	534695338291954	248182291622412	-141576437273207
ENSG00000104808	DHDH	903661860767324	2177971030835	16009202078873	137764900114642	42554522110094	748248170378142	85605710874046	459322668010465	1301082534067346	190775789159607	244130967228036	249140752791531	495448767090218	457253230406391	30786566563832	3538384837020336	5394332269653943	1666267907479757	959788999845956	1797668790941009	121035886051238	2612578304317327	4542851068934408	666111468733055
ENSG00000160211	G6PD	656407029857389	73120680348944	338302920016156	1132800464600452	177002346956471	801257764984978	4860195799108	288317769490061	1353472740515155	244080281627451	-153633799279288	1581850169112912	2472096423380138	59746221895608	-366873977021438	2570232054928975	4435601590962673	693071654098557	-604003794467694	234889359628829	-1442347160923699	2797666250099389	4725776363165438	852229077913118
ENSG00000183742	MACC1	-694299646311814	45452067304686	225709286036668	-215053957179706	-1170361889492393	802164331639376	48120011707548	28605299699686	1354368445949901	244992167232503	-180630203129881	970699902709712	1632465135316743	3274285248611	-393838856974634	-2718604654590882	-842066810897335	-4582677374576764	-710138840526786	128726928814372	-1548358272316503	2800831612163021	4728903802267219	855413011589259
ENSG00000189190	ZNF600	-355885059268772	1462844064623346	3627550100148877	124289571456916	-834422100951658											-139350608021615	486669133816795	-3267269138895543
ENSG00000124160	NCOA5	-760558248031507	18745636405329	105936701984144	-281623956233715	-1236008660501727	-171347332826483	5478418844898632	737188817531205	387292440641175	-728919360910026	-440459454270096	5.16267e+10	1622750482015	-227312638270784	-653206030048505	-2978047308780199	-110272877471326	-4839724340066195	-1731644878511924	-89366855919787	-2568047672903352	-5982752006181	1352267693930866	-2545089962529384
ENSG00000185745	IFIT1	584271416478293	169955690371157	679728078648767	1061257679863464	104602421298116											2287777331905674	4155468152005079	409581988026566
ENSG00000176108	CHMP6	58683835274417	8107499289934357	9040187015651888	538494492693386	-421397185525564	351498736231266	2174781062290041	4583295238087882	907986283536899	-207177106817484	85530740615939	4321022524667167	5512447670848957	298836643024061	-127853027861862	229782844588437	2108532882141675	-1650025829750739	336259938359956	1174861698137114	-502647948075312	1227290635149397	3170318831234017	-723378199707528
ENSG00000135390	ATP5MC2	-743748702719731	23623488078621	129000776559144	-264731388015545	-121935827284784						-719225876740552	365694	2.01812e+06	-506642905566727	-931157411949947	-2912227733084165	-1036584113931903	-4774527963232279	-2827601482672006	-1991841891810171	-3660799984787651
ENSG00000188895	MSL1	64479098967587	7924682511752463	8936054723287801	544272989815111	-415611852611802	900882429013798	1534355027156	109061420645236	145184986532181	344344962916898	164442165271958	130915983951628	2105118368655526	377670094748455	-48935440685757	2524748205019	2131159206748222	-1627372738868064	646496358618247	148479157161476	-192387300169636	3145515060321085	506926927378772	120231256811894
ENSG00000167264	DUS2	-681377674095155	53587791476137	259878465440572	-202076205317071	-1157554388909509						-52981481085068	6265224936603484	7225172901495008	160397087182444	-266311813530089	-2668007287875638	-791251033001864	-4532528233808418	-208294110814283	630593331247668	-1046991916090903
ENSG00000242259	C22orf39	45220772651206	8536040017654473	9270836805861038	525069140181957	-434835935243934						324347903819313	28814843760106	69833202774355	537336487530956	111064326939986	177066780412203	2055964475948504	-1702646694143107	1275157976653117	2112512213439709	436643988604374
ENSG00000155304	HSPA13	688525475905267	48938364905151	240252009337186	1164639066312831	209254662086157	1437030702622171	3.87517e+08	6.34156e+09	1979420099919035	885868284566167	636739382903172	4.73499e+06	2.20521e+08	848946483456059	423954910078771	2695995271701193	4560269047255839	819359049603751	2503309852159485	3337591725993292	1666758067378667	5017526784477442	6911329974338116	3093091774044362
ENSG00000104983	CCDC61	195058816177288	4260163490441927	7009789983470684	674389776448715	-285170492899741	1992881346719852	1399.48	4415.89	2523079755268957	1450752607327972	-368882470260814	6998479990546	18799901008668	-155644533436994	-581785013539547	763773693959808	2640645425935578	-1116615619016224	-145024345420966	-611908897814858	-2287259427227478	6958331173583417	8809568388716112	5065438095119429
ENSG00000248485	PCP4L1	-129980529903986	5958292362827506	7892248580211404	350200275133091	-609562579609325	21234298573967	456375946908556	6647056746653467	769699845809909	-346336875256627	169549510594468	1193702057032259	1944733638059103	382771479145593	-43826780549544	-50895269136356	1371246698847164	-2386807590920327	666575637845372	1504847415754293	-172302851816516	741415347981492	2687478830697456	-1209267515914199
ENSG00000171443	ZNF524	456052391762012	625767813854543	1923178544616003	933970372927074	-23962388965392	401597253655445	1587719171050005	3873085367072863	957719349898441	-157024090878933	-43678726828663	6882864183559521	76301095577395	169697524550564	-257015211515683	1785722002837802	3657061063731556	-93827301400028	-171720785828324	66715754750025	-101044277834453	1402214283321804	3343966472921768	-54826426488705
ENSG00000155893	PXYLP1	-502351124783394	402142815150132	1368670956050633	-22442906848995	-979950699353248	-1957268254675772	354.737	1.07195e+06	-1414454457431609	-2488347804313473	299361101520004	59525341947632	135644371195165	512394262739645	8605563007609	-1967009652575509	-87877606371163	-3837101958330637	1176923581154239	2014453072241024	338323515691862	-6833984739729795	-4938699717853272	-868829854119072
ENSG00000185024	BRF1	304345290650523	2141455573077865	469324602395217	783163620013024	-175873945881486	-10807766467992	7046449552666927	8409138590120459	450463426362367	-665945154507114	-243305519183625	254077420089174	504422812175943	-29960635543323	-456429015531565	1191696594057804	3066561064784779	-688653278788998	-956543791087863	-117788778496154	-1794428430329041	-377363250726487	157283508492645	-2325209644884633
ENSG00000184840	TMED9	-9599959408068	8.51908e+10	6882052973697	-482255661157479	-143335392214745	-228376169749383	4230821608070423	640298904513871	330314263193034	-785643807442984	-558077445960791	2.87986e+08	1.15725e+10	-345127958770574	-770520411348944	-3758966963226164	-1888323711656797	-561245085623465	-2194054280688487	-1356853749970498	-3029263445627185	-797396705973634	1153323070858381	-2743148660436416
ENSG00000128881	TTBK2	-16052922724893	5124121663896796	7657914667638976	319679409225525	-639998451298785	-492290976798008	84001136236682	2591341446531263	6616014919908	-1047680922931489	733092360295917	15262.1	86633.9	944974734588123	520546124880689	-628569388901606	1251738978284119	-2505982507515829	2882116886981827	3715122115347419	2046501720964586	-1718879880112075	231004334191103	-36580756992893
ENSG00000038002	AGA	-686153510149396	50439200342667	246832323967286	-206872468836261	-1162288101819973	27404185932309	923432862783749	9645532303736756	585583895384853	-530946340538982	476034336086229	1.21114e+10	4.10412e+10	688695286412798	262940960315213	-2686707585644177	-810031316698075	-4551063593894292	1871505792617308	2707571954717813	103373957095637	95684272208839	2044620810321443	-185384868946329
ENSG00000140538	NTRK3	-132739689961823	5880470253322545	7892248580211404	347443996726223	-612311915669857	-65942625166631	205550886814676	919485022377382	-101530726836354	-1213229198311469	-83250942106809	4444749710217351	5634886151212107	130132609379517	-296558702730734	-519756478195144	1360454195428699	-2397572910837889	-327297021628117	511610011715742	-1165906086890144	-2302448287351036	-354504006364859	-4236102949735245
ENSG00000160345	C9orf116	-584203498591283	170084280964966	680116071136738	-104534278242602	-1061190296864535	2444161504366777	0.000215074	1.09674	2962014109627242	1911981196586129	304785621411427	8.32673e-170	7.14038e-167	3240146241228674	2853048924375686	-228751139214215	-409315166591639	-4155204306653145	10	10	10	8534017951997357	10	6675860750770936
ENSG00000214184	GCC2-AS1	-96139425716977	6948340842773315	8335516989167369	384000094550262	-575836045887875											-37644422207654	1503593513194503	-2254747734566645
ENSG00000155313	USP25	-770466855084209	16322143850278	94117807792085	-291582783894015	-1245822196001932	-883142911988047	19002686980582	130718573945016	-326483280201424	-1434340458103717	53761173895551	6214553617209658	717939243005746	267090973942307	-159617571787123	-3016845521334509	-1141723631437414	-4878150289770436	211359435100086	1050055147278873	-627528704460928	-308357588138915	-1139946836282316	-5008133544720278
ENSG00000164402	SEPTIN8	1104547682574595	6.02511e+09	6.55037e+10	157615416864284	627914184926225	68007045754658	8114827628430852	9039557108031148	626038659817807	-490448456549789	25763456352461	179407853164558	368687729892035	470736241149045	44298477227677	432497479584813	6171600521456778	2458665267787604	1012877730583282	1850676590576343	174157304318287	237452945844885	218587239508695	-1712446548743781
ENSG00000146409	SLC18B1	-99704444801248	6841169845271764	8265021146532954	380439942306396	-579389511497443	440400352433464	1222148625461693	3291359066642621	996220322708649	-118159454196939	364508348643425	8098406990912	21541689428469	577419716479156	151265553639131	-390403436268408	148965335563769	-2268661709890438	1433046808245296	2270097474578883	594693152150726	1537698923339704	3478396211932325	-412564759535451
ENSG00000240291	nan	-497038548495151	423759394705787	1424458574025059	-17117052958008	-974675694246122											-1946207690912691	-67023654832196	-3816447110652978
ENSG00000019485	PRDM11	46225429838261	8503894887985316	92545924306488	526071043211333	-433833152343263	-210334880388937	4606470812425589	6684547145389226	348343454146126	-767702714385431	-205223649502364	594032847641647	107055603484898	8140351618511	-418400882687206	181000623270261	2059887534607081	-1698720190254202	-806826776369691	32003395665192	-1644922679366264	-734403860777378	1216273673336484	-2680505659980814
ENSG00000047579	DTNBP1	886279410491372	2879292313919	20608613680586	1360454628590542	408052858783281	-777715355615025	6274654520247	35595848650371	-220402991996719	-1330209222414082	-286098636379259	85770554727599	189652878866321	-72782627708422	-499154378651568	3470321990554223	532700586165202	1597774688638017	-112478284580444	-286141353747951	-1962401113199294	-2715465731092155	-769557611889985	-4644549619046249
ENSG00000169717	ACTRT2	108037994590346	6593144745746558	814622737072717	587695579880332	-372117293675795											423034343350466	230118501058204	-1457065133209711
ENSG00000214194	SMIM30	789139268952601	12520672947793	74676746961129	12643129236487	310352420909648						-725402443053655	24828.3	1.38575e+06	-512835733371513	-937312181275046	3089959358457594	4950552715026318	1215218156210316	-2851884352114774	-2016188692514982	-3684997160434366
ENSG00000213903	LTB4R	963581381342778	8.01088e+10	6520423071786	1436898304277673	485866098367118	255113236021774	370834727125643	5998610535072881	812225746225592	-303588437798803						3773006139800209	5626329264221834	1902460765384784				890751667642356	2835961979999946	-1060007357764616
ENSG00000269570	nan	130361072382926	5947531320848787	7892248580211404	609941771491953	-349820134433168											510442746212373	2388292357364573	-1369758217207141
ENSG00000272008	nan	201672174015109	4104948974594282	686453032578904	680975353545812	-278559788002275											789669005149842	2666431958658791	-1090730695698394
ENSG00000119782	FKBP1B	2556012508690323	1.46606e-11	1.26298e-10	2999181192111428	2101835277848916	34365815336328	3.34003e-21	5.19068e-19	3919650841835182	2934613918145454	1101443501344992	3.06164e-09	3.25219e-07	1311721334358436	890175015654276	10	10	8229961227687514	4330271446290057	5156968498816097	349967969104314	10	10	10
ENSG00000115956	PLEK	-130816018026978	5934677944458393	7892248580211404	349365667299875	-610395100656148						-78540668348869	470667870133255	5867984985464005	134842364558737	-291852198037608	-512224134625971	1367978702453688	-2390067416278097	-308778809905673	530126184671222	-1147402693062329
ENSG00000164051	CCDC51	191623971098381	4342110099833808	7084547365160662	670969195321067	-288603794354494	475274705722384	952939720601388	2803594065310847	1030808944634534	-8321538816754	-182098905659121	94382139786849	1593634581661908	3127368174833	-395305755428879	750324190033197	2627251774038406	-1130059078717071	-715912972942744	122950955659357	-155412531209954	1659465981899546	3599165612777146	-290554292437479
ENSG00000100201	DDX17	-545153688343591	25968993549793	962640643858678	-65362381187081	-1022440768942478	-594156562071376	369564445790754	1441717855889651	-36006698623974	-1148615907820518	243112214161484	255245652781358	506278290633582	456235998876141	29767217837539	-2134607676197307	-255933406669975	-4003476378327524	955783821814106	1793669594754978	117028366212147	-2074553075954696	-125720747953913	-4010499617057663
ENSG00000132768	DPH2	159745633145771	5144733555731249	7671152491677092	639217862693978	-320462401363168	628067824447062	274104605838133	114561282846179	1182191990487338	70044123406939	-28258195473459	7952142131074635	8487890679482383	185113402085538	-241604065464289	62550114223394	2502926029198979	-1254804867891311	-111095718330517	727764318730627	-949854608711257	2192957412727021	4127733642601579	244565592543198
ENSG00000224858	RPL29P11	-34777574024435	8871523463088995	9429793524334718	445259078229988	-514653998303658											-136175317271797	1743459627273461	-2015182872012829
ENSG00000105369	CD79A	-76600064263868	7546087653949543	8710477532592523	403510616941811	-556357848433394	-1387214111901816	9.7449e+07	1.46945e+11	-835414591267719	-1930532610973478	1557172631821109	3.89685e-33	7.83138e-31	1764670145534533	1348291746542082	-299935758797993	1579989054037604	-217847876547803	6121948312632757	6937714675330634	5300743292043825	-4843587509697417	-2916927996166241	-6740634745097304
ENSG00000269910	nan	247613420699267	3122181806004961	5935424976249346	726712088827487	-232625373132366											969556878831933	2845519046032462	-910869572716978
ENSG00000133256	PDE6B	-21347398335709	3836447516953165	6650480535465253	266761669177458	-692726549344066						281429216570449	97225074750491	211989738704908	494492730891853	68109676874987	-835880254111496	1044533897352109	-2712445024867088	1106425249391968	1944074072219065	267769875284252
ENSG00000102547	CAB39L	-100990188975011	6802672035336779	8254501528257828	379155923477867	-580671059022588	139731524544737	6240707093366982	7904688043245104	697456751176066	-418864519974832	187651340852613	84755377104223	1454725744797997	400851287268473	-25719393253614	-395437905339468	1484625642340752	-2273679746534192	737742101306018	1575927300263402	-101114541132642	487885655998696	2435235324934204	-1462504554847763
ENSG00000048544	MRPS10	-274769980547295	2620899718605555	5339978273508506	205463312849284	-753738286164439	694961135487418	146361864370439	706601181644691	1248386997668642	137224234410139	8812947015555	9354857622447048	9540652364104808	222169206229	-204551335970285	-107589129855648	804513615449643	-295134301737744	34647671689491	873447406792619	-804183608483766	2426521649896708	4358859686690141	479131218543848
ENSG00000186010	NDUFA13	96799540115748	7.42452e+10	6100795559597	1441261610514455	490311062926727	-276942331987228	3312880377012982	5855532086101476	28176259409305	-833922315467415	1500912284164188	7.23554e-29	1.34685e-26	1708800538363079	1291688289301287	3790289707316699	5643414257290364	1919865500365475	5900763497687982	6718066037561594	5078209558491619	-966969993032159	983800387943021	-2911717575968405
ENSG00000258525	nan	-16426355815286	5026486722987578	7589949137838005	315947866097094	-643718378463755											-643191561663952	1237127721355431	-2520548280895014
ENSG00000112242	E2F3	-142120976753211	5619447408479297	7892248580211404	33807196125166	-621659256036763	-807084594676644	45578825908461	273724573574866	-249941459847439	-1359229603818427	-316992256149668	35857489070098	85194693264733	-103701956785692	-529994238670392	-55648991176752	1323756986378566	-2434173423548079	-1246239606320059	-407699189150542	-2083646519871558	-28180111696569	-872693928562253	-4745876988549458
ENSG00000121644	DESI2	400542078581759	1019938716681806	2795777032095718	878814929800624	-79573226996422	-32181542161219	2588808807690401	5070416427613788	236879452667805	-878506397362287	-644402035338573	3.08712e+06	1.46282e+08	-431635053203201	-856584754555804	1568365424030244	3441094016641562	-311577496031353	-2533435196767123	-1696952175777808	-3367621216568032	-1123648572470069	82708671170651	-306738705795001
ENSG00000163251	FZD5	-1352164976773412	2.83343e+08	4.55061e+08	-877900115452295	-1820313684737856	-1080979209441577	1412256768231	13527465773685	-525883500625424	-1629415351788684	-232927833602705	323729047205463	627185086519469	-1957712622445	-446066586022122	-529454684178257	-3437511963044581	-7127633266748518	-91574442598674	-76966517653091	-1753689043729419	-3774339773631419	-1836171311502301	-5689255738043908
ENSG00000239677	PDZRN3-AS1	-258825850428324	2908039644982282	5688505888645178	22141153165936	-737871547204261											-101346034877119	86696057494303	-2889215100966337
ENSG00000100575	TIMM9	18729534441647	9390810980111828	968908192386071	498647038651758	-46127426161527						423833615416528	9.81389e+10	2972605486005	63661836246375	210663680424299	73337498847744	1952505906459601	-1806168793735863	1666281203325398	2502834066199872	828213992817402
ENSG00000186710	CFAP73	-72015768255381	7688639793627938	8800033758588771	408087616582323	-551787373685647	346306303915749	2243550168841938	4659267180662122	902830140189864	-21237357998841	-107917983768808	321568235933236	4376350452820196	105466737136036	-32120446180331	-281985456600809	1597910786524226	-2160582581908127	-424274293765061	41463733709071	-1262799687563986	1209160773224976	3152315675629099	-741522170655652
ENSG00000149256	TENM4	195149236962216	4258018527978148	7008192574112101	674479820219268	-285080111219378						-540373201537331	6.7632e+07	2.61198e+10	-327390226947205	-752865627403314	764127746231162	2640998001966752	-1116261719862984	-2124450906560416	-1287118721761705	-2959854522957227
ENSG00000077152	UBE2T	66247719721336	7869110981195867	8901166807875097	546036429680881	-413846198453313	-846433352442236	29234300855634	18882035709555	-289532203974472	-1398096117900604	-365371163567707	7869496345281	20967519297043	-152129320384884	-578280797166279	259400044558818	2138064144483161	-1620459130832737	-1436438923070513	-598089009015669	-2273482771335229	-2955401028944188	-1010928705809744	-4881583049018972
ENSG00000175229	GAL3ST3	-21259045852743	9308730806193556	964876963004094	45875009284288	-501170238682048	-261028698215702	3598394583940973	599261900913345	297674383157767	-818105816614652	39342539845904	7178347976566815	7870253041587189	252681766118017	-174032505425894	-83242071797732	1796285140460155	-1962385766521822	154673278031249	993406048955637	-684200313544747	-911406055851626	1039357884157605	-2856492794420184
ENSG00000160321	ZNF208	94171597715794	7007761008426893	8372646059868385	573874543138138	-385965183931834											368738980698601	224706726038845	-1511288031213931
ENSG00000146733	PSPH	557376668023661	22804008034492	864361001476338	1034571314808558	77621992284479	1295534552552468	4.89369e+09	6.48846e+10	1840492357156603	742636426272755	70050993982293	1.15923e+06	616056	912506534195284	487878691978246	2182468062743269	4050974830371157	303937227455291	2754020688808336	3587474967852472	19180713005678	4523479773804881	6426250797431502	2592984376153486
ENSG00000270141	TERC	752502905328089	20954513419235	116253826767151	122802992217215	273528486558409											2946505751350107	4808482735269512	107103009582541
ENSG00000257103	LSM14A	-201024103188373	4120009141112753	6873703375330805	279207617421667	-680330023530273	846645281303001	29163022202473	188519876122104	1398305403425918	289745483469032	-54488245234717	5.45485e+08	2.13044e+09	-33190787962288	-757362407132817	-787131414391402	1093267341200514	-2663905099840252	-2142178806359327	-1304879653086683	-297753339331158	2956140998336179	4882313788958591	1011673391065656
ENSG00000221983	UBA52	349605891945992	1535430345902438	3759072792963602	828178557659365	-130575540694803	1005967018509438	4000717150344	3403962134064	1555500616696775	450226193628374	-1917067968621355	4.25285e-56	1.3344e-53	-1710704767017445	-2121749886926247	1368919327793986	3242821876181622	-511282519866339	-7536859289633396	-6725552419712961	-8341556276201693	3512427709764192	5431175543644111	1572006764700032
ENSG00000028116	VRK2	-98675447328158	6872039372744992	8285920499989302	381467547541557	-578363861266469	-39147858842007	890795606799583	947492012424074	519234917635293	-597286619005432	-592635803541068	5.04805e+07	2.16179e+09	-37975554883635	-804978385086468	-386374286412484	1493677054036833	-2264645666519654	-2329918779301279	-1492990432725959	-3164733290054436	-13668840195014	1812957163627149	-2085481961798894
ENSG00000163481	RNF25	337459174836738	1683560593122018	3997226821085757	816099686951865	-142734338617936	-232489708541083	4147747874044513	6331371120041888	326202973825029	-789733995488563	-382437809716731	4408857986725	12186273875058	-169215447874678	-595312488738323	1321357555515067	3195525763758048	-558891595866378	-1503535610656222	-665262286543185	-2340442036705065	-811759510490392	1138968120414343	-2757429933644284
ENSG00000116833	NR5A2	-108964191456705	8.04649e+09	8.54102e+09	-612884893385424	-1561438124975313	12359510352256	6646611106642345	8168809486294619	681394243351363	-434974323378869	-683130038207107	3.29589e+06	1.69397e+06	-470455303828191	-895185715594728	-4266609664163525	-2399816466473834	-6113978275753178	-2685692452621525	-1849572099190988	-3519379013660752	43154383634471	2379151580105882	-1518753436604379
ENSG00000228624	HDAC2-AS2	-318459279113345	1936373355274937	4387551073388355	161750283641344	-797203096417563											-1246961428101285	633350566033942	-3121534138880596
ENSG00000198690	FAN1	-604407082084033	135393841089895	560980599375352	-12480680749501	-1081232835242249	-402676521489029	1576541924211081	385776566608849	155943339600365	-958790439431295	-127733942882888	2406872681818473	3477621947024646	85649836320835	-341001445234925	-2366620687983759	-488694426942255	-4233683013091949	-502179771284126	336728157319583	-1340630563112226	-1405982647666944	544490720955332	-3347706281966809
ENSG00000111907	TPD52L1	646375750961583	82617661271992	373261290290518	112285458163414	166931302033883	1868872040542641	33041.6	916062	2402079627378395	1324420874819051	669883303314368	718535	3.59879e+07	881983151571844	457176293082304	2530953507629543	4396657420574764	653637398660603	2633613559975142	346747377663652	1797366315600929	6525341110021625	8387085151922169	4624339063319821
ENSG00000152223	EPG5	-173206698698099	4796718608843293	7394676306589417	307010857629481	-652626482684018	338529649162001	2349424658871956	478792206350846	895107277007921	-220155722137677	444003775624725	4.48895e+10	1420081986551	656742061958436	230862041054433	-678209386665159	1202133907161179	-2555428917411876	1745579205183864	258194941002745	907622863260356	1182007857529185	312535057822544	-768694246104916
ENSG00000132541	RIDA	-51656417217159	8330567251567932	9159668596470698	428412129518732	-531486974878339	-2538472693794642	8.88908e-05	0.00522033	-2008669280530225	-3053469703577949	-145800009813096	1804943579044362	2754109728238633	67581450130232	-359048753829808	-202266236245477	1677493594559244	-2081094195329268	-573205632963926	265693177580569	-141158267731089	-8863314269860829	-701345621762079	-10
ENSG00000174106	LEMD3	-663603394879162	66923012628232	314218644642303	-184227839138457	-1139934979114864	617565915568306	301094794763863	1232707990390761	1171795236952052	59501761215223	182026087357915	945139832236483	1595403261964403	395233026790269	-31346523480351	-2598410193213004	-721363842899177	-4463537546958271	715626691340379	1553839383001301	-12323732937883	215628901796611	4091432407534214	207755951265474
ENSG00000086061	DNAJA1	650339812400588	78740337020625	359286152206189	1126785011251592	170910961562114	-32382231650315	909579245631152	9578146995362936	525982152871956	-590544770371616						2546475214916029	4412047438860541	669220181936682				-113065583324094	1836515765026098	-2061942168226398
ENSG00000000460	C1orf112	-280420273148723	2524003848577473	521834221818307	199810984729732	-759360570830658	-97749871224718	731724120060643	8580203068584581	460770872343636	-655661369323968	-14174106741866	1929347440427133	2904791829467766	71641034954379	-3549941470528	-1098015624627566	78238131908925	-2973357675377357	-557248098754228	281653237471367	-1395642188369813	-341302796213253	1608824494335867	-2289302849359601
ENSG00000271553	nan	-252599829997426	3025698728033898	5827101270291162	227638485207523	-731675088746049											-989081698698516	891342878736332	-2864952203965078
ENSG00000126603	GLIS2	-202844638636428	4077785862054041	6838767978645921	277387749874742	-682142849406135	-916622119157365	12651628360335	92636682657645	-360196023967804	-1467382497729371	-817495989774117	525.968	346.558	-605191135291239	-1029061524008707	-794259915996179	1086141454834172	-267100341378908	-3213945642833932	-2379279454188438	-4045705229954321	-320047165709429	-1257658026806901	-5123502909155544
ENSG00000267980	nan	122038041664518	6184884326597618	793164655262486	601647964355509	-358134060513515											477853027678647	2355817066897135	-1402312285555038
ENSG00000100554	ATP6V1D	749648747915791	21792700333703	120240101529812	1225202759615112	270660262150034	-2187038030662319	6.38166	250.496	-1648901093101971	-2712192644265752	224435764139552	392327727866435	743213867320169	437586659386281	11080633442778	2935329992198814	4797412677366304	1059799255843795	882358268756434	1720350625432905	43562970361599	-7636247351914915	-5757292022012243	-946987368636904
ENSG00000163995	ABLIM2	18689286385158	119.332	418.574	2328008376117243	1401538322376261	575451512753441	433399838738596	1623384049185642	1130090316940051	17237592271403	209907573748353	538257756412001	981352385903395	423078530654794	-3454410079828	7317990327025751	911556622685724	5487873466506713	825241396270053	1663312624383969	-13580844876917	200924265093284	3945815787915111	601866618186
ENSG00000086544	ITPKC	-63409056751241	795835551875328	8949877437595393	416680085434516	-543206067582414	-800581581510083	48964262735057	290145144160304	-243400136928348	-1352804652252448	-163539973005636	1330426322130011	2134215490412881	49837853633793	-376768943905569	-248284955556095	1631555518939239	-2126981558432679	-642949433691869	195935092695418	-1481248740993866	-2795305292403554	-849854289233347	-4723443670658305
ENSG00000159650	UROC1	-127669702585626	6023827831587921	7892248580211404	352508632829174	-607259924001051	30466450499489	285146050516936	5379158979404957	861468574993343	-254036870646577						-499904399409184	1380285320730911	-2377791296172336				1063764546785291	300789791138595	-886993437501497
ENSG00000141934	PLPP2	-1062696609091349	1.34467e+09	1352650559188	-585721778504994	-1534830469602509	-1289271455832314	5.44274e+07	7.12138e+10	-73630176893795	-1834337910439355	-1306801211407512	1.49021e-17	2.13154e-16	-1096498026929575	-1515934923284996	-4161102433568285	-229345637981759	-600979315031273	-5137625275218513	-4310828554645332	-5959824271257683	-4501611587210256	-2570866328995639	-6404761972459925
ENSG00000185247	MAGEA11	-128857608718474	599009807045906	7892248580211404	351322002632202	-60844363575244	272868069267546	3384547429554648	5933086711799872	82987318880039	-285836654194926						-504555773148365	137563894305536	-2382426246361515				952744324585619	2897579672395108	-998025348930586
ENSG00000240342	RPS2P5	-56520093867362	8176027464793486	9074810966543382	423557136603378	-53633692892246											-221310483279025	16584833496199	-2100084710028418
ENSG00000197859	ADAMTSL2	21993313224097	369415403082044	6529081318502574	699157434261068	-260303973581684	39525089733063	8897499873403193	9468203121291968	597662509089655	-518858697218951	-1129119324799792	2.11544e-10	2.3385e-08	-91797036488998	-1339253374371736	86117174361994	273762584378493	-1019248098348954	-4439077597411328	-3608955751946903	-5265209372344449	138005538804873	2086794417101461	-1811643554939166
ENSG00000261480	GOLGA8M	888233221084692	2791037307887	20043538012659	1362387441507196	410018877415539											3477972345269805	533457399771486	1605472845238068
ENSG00000183688	RFLNB	654957360422606	74429705946434	343253228472884	1131363195167185	175546870602197	-589893575618273	383362381514439	1483889123296742	-31728767188231	-114439416025049	-85191507830876	4339305750085042	5531377982050243	128192229763392	-298497688143664	256455571893492	4429973808503129	687372580489064	-334926261198114	50398150382005	-1173529113543922	-2059668460983506	-110783951181351	-3995758991494643
ENSG00000179271	GADD45GIP1	1508471564796066	55550.4	1.1638e+08	1974140926356018	1036010046289744	-1221690995060796	1.66124e+10	1975585820504	-667977521905218	-1767902620758097	-1727353413290613	8.40935e-43	2.11611e-40	-1519593421067066	-1933587634482903	590658203436679	7729960312840946	4056608337635976	-6791005761158118	-5974207476989677	-7601805550876177	-426564810263774	-2332305845290983	-6172796959602526
ENSG00000260278	BMP2K-DT	-399496588356425	1028923530987561	2811103144345947	80620325668234	-877775841814524											-1564271695035824	315677523070292	-3437025356300819
ENSG00000176919	C8G	-58899042225214	8100691260183691	9038450722356576	421182353109435	-538709082763443	-72175744638303	8001642658739596	8984887025751097	486289495869289	-630191116005414	455859949409213	2.79111e+09	9.0418e+10	668570118282758	242735603334689	-230625510462235	1649184630407562	-2109373132552841	1792191174602657	2628450837021915	954303194702827	-252008346969539	1697925149464058	-2200371083322817
ENSG00000235530	TMEM11-DT	-118200266569604	6295703348344708	7976872364093789	361967413549285	-597823441256778											-462825808103167	1417322190084147	-234084173693257
ENSG00000258553	PCNX4-DT	-178187334845364	4671280079421605	7302954436407703	302033303667352	-65758727505071											-697711601140863	118264376131161	-2574853431438621
ENSG00000184939	ZFP90	931490812678727	1378780239584	10593931509074	1405170897534319	453556244265885	75284226699261	81612458364727	441226009276653	1305624173260048	195394189297931	-524390752583751	1.42962e+09	5.35273e+09	-311378699538162	-736926684500563	3647352079911237	5502097203743666	177594806987159	-2061616687409851	-1224170182080637	-2897191345725214	2628619021312106	45587086259464	682237043749087
ENSG00000113722	CDX1	-131831703589449	5906028171113678	7892248580211404	348351042866906	-611407170219162	-256220319572833	3687612684937798	599261900913345	302481647426119	-813326235669868	-325686544465578	27678033038044	67411064885848	-112404215870728	-538672664983294	-516201160269586	1364005831776331	-2394030283088408	-1280420777114771	-441911696635614	-2117765329974484	-894617153160486	1056142895906139	-283980444157896
ENSG00000138758	SEPTIN11	1406362165204695	7.61044e+06	1.33692e+09	1873677158185221	932695538182096	730651332555884	102562521614892	532993813988219	1283684478361618	173088061677572	-342735168945735	16373089859694	41496503927044	-129469408170355	-555689251664175	5506761739943203	7336583664562764	3652069311697774	-1347446613387622	-509002668483273	-2184665211200855	255113730313748	4482104134062361	604353117825376
ENSG00000112115	IL17A	154811690379034	5275499461778173	7775161288463458	634302709432705	-325392418427431	-256212023063234	3687767802113678	599261900913345	302489941789585	-813317988627173						60618176069257	248368021997942	-1274108877924032				-894588185123091	105617185645011	-2839775646259876
ENSG00000159713	TPPP3	1486090906390665	1.00165e+06	2.01612e+08	1952129329263036	1013356520731096	3398008913537772	2.28902e-19	3.30967e-18	3882624663900521	2894651267850382	-139798435500729	1991069210849757	2978678659354756	73583949455933	-35305356534357	5818948168446014	764377154603134	3967906031140812	-549610736043752	289291711145585	-1388012885954927	10	10	10
ENSG00000254894	NAV2-AS1	-234880607064331	3377639197851734	621508808288032	245358324746306	-714037974553096											-919700182810473	960726809010011	-2795892193646451
ENSG00000134716	CYP2J2	10226425716516	6764605749943784	8230978149449605	581940953079716	-377883549324858	933753081676373	10221195969286	7703834441384	1484285013933162	377451384241013	-2435717889011	8229786622317041	8702213616858048	189013080588969	-237705262421454	400426655845687	2278652152775337	-1479643525018459	-95759061750536	743095714714623	-934526654557929	3260286011183009	5182519621618843	1317906727261702
ENSG00000175711	B3GNTL1	-40435703912232	8689468080983372	9352207966239076	439611944220901	-520297056605375	573653424398927	439999181459766	1641643197852093	1128309276467381	15433553392587	427337654694127	8.58727e+10	262355791116	640114454603682	214172493901827	-158330331077373	1721347669009107	-2037278871408291	1680057162974655	2516578782064699	842008722001008	2002964457667262	3939597118919694	53887691742191
ENSG00000004939	SLC4A1	1053578849154089	1.59545e+10	1520413248862	1525825413232585	576531915189123	266387622825373	3500570721028032	599261900913345	823432344363154	-2923163959554	-629146438152808	7.19931e+06	3.3067e+07	-416344881796355	-841377452213409	4125400867628346	5974532887266112	2257472485373317	-2473458559918339	-1636839612063831	-3307834448542291	930117241156126	2875090863061031	-1020649971898174
ENSG00000172663	TMEM134	-38485258847707	8752152078898487	9384402037401012	441558633483689	-518351841560436	471283075339158	981114659753422	2863987273456035	1026850699103818	-87215689081722						-150693154450381	172897013939199	-2029662173483349				1645528831965989	3585345029171197	-304521716338898
ENSG00000203709	MIR29B2CHG	375663124889734	1251298207514053	3254735446283835	854085503234988	-104487600529882											1470949215239445	3344263297334947	-409132395006286
ENSG00000000005	TNMD	85174722470025	7281715163611582	8546858110998018	564906115072685	-394949065248584	26922995640272	9247732857422012	9652067668485282	585104350245875	-531426176650588						333510751720163	221195041939246	-1546465381071084				94004151405352	2042946433723367	-1855524082019448
ENSG00000144285	SCN1A	-468894523959497	555307009969009	1756446919327736	11092770450879	-94672623034696	-121823173980963	6691815695900312	8193071953097305	436743153077685	-679630253947688						-1836006747403659	43434931214878	-3707007990161972				-425356979015255	1524929470543524	-2372992446508859
ENSG00000135372	NAT10	-424127369202509	83333118910655	2394609565127558	55948853111009	-902253026324022	-94747411433449	7396612585607796	862824829034978	46376719367185	-652671481093319	32440521886892	28765309989797	69741861236586	537393697273092	11112169527902	-166071615645832	219073728892986	-3532868394810615	1275383307977377	2112737130752779	436869529433419	-330819427698913	1619286429833683	-2278863375622191
ENSG00000100154	TTC28	186917383035443	4455861254912361	7159160248739643	666281969416586	-293308083274043	-782100110417239	59860526652084	342993160613713	-224812394428647	-13345424953272	-2409454885034967	7.78611e-98	4.02169e-96	-2207442520607007	-2609400852637394	731895040194053	2608898438805224	-1148479226013938	-9472654454858888	-8678452689256075	-10	-2730775511616211	-784953451913004	-465967964575086
ENSG00000166532	RIMKLB	-96485781823745	6937901566417052	8328498190509116	383654216622647	-576181284858403	1945085438674128	4856.28	1.45022e+06	2476463279964262	1402040640915598	-176510252361574	1049373527273727	1746977981273243	36864067495572	-389723917884328	-377800416522277	1502239191110473	-2256099554745742	-693941454868479	144929284775166	-1532180589826011	6791447300907458	8646802615505812	4895355719180859
ENSG00000116288	PARK7	692034004901882	46792295700499	231460070533426	116811643315026	212778419018825	690370282290814	153050210509468	73177732504998	1243845642737785	132612088460681	870593451845262	1.08805	7.87724	108194417512282	658456098622414	2709733292902317	4573885049683858	83315669742006	3422695727242603	425361079555431	2588688061637682	2410492257598038	4343003122204904	463027480611807
ENSG00000273249	WDR5-DT	15635184725196	5234499162691254	7747817934707556	635837026033229	-323853512070044											612212409945784	2489688001020298	-1268083125198396
ENSG00000136895	GARNL3	43287424938238	8597967551381289	930495832703362	523141065347702	-436765648889836	386620740273835	1749059391391242	4095660290727032	94285499374006	-172019842193043	78974206967344	4682220010843866	5849050031225295	292285393699487	-134408877627011	169496550297097	2048414892354952	-1710202694679251	310483245855546	1149105780695059	-528421951925284	1349922389423369	3292066186433388	-60062332982186
ENSG00000127954	STEAP4	-241955017622468	323409373255221	6063081190631698	238284029880132	-721079962493845	351624847326724	2173129870001379	4581078885317108	908111509553754	-207050893825082	69473265541297	5234045303466904	6363783487214734	282791784486863	-143908502531878	-947400795325549	933026649499212	-2823465851929284	273130757670862	1111782118750109	-56576926427111	1227730963806346	3170756069556439	-722937515267891
ENSG00000234193	ACSL3-AS1	41439889008643	8657227071075329	9332333922105678	521298534830892	-438609678580172											162262325413933	2041200266701843	-1717423190506927
ENSG00000128591	FLNC	-219974152953	992838351364584	9968187764364854	477767632649013	-482156980890529	-266836952050624	3492445745198537	599261900913345	291867130739849	-823878942751778	-1084262497100743	1.55498e-08	1.61296e-06	-872921465708345	-1294627958091844	-8613323646129	1870750355170349	-1887937318498638	-4262725165426254	-3431848200288716	-508976672307587	-931686116072042	1019081320478098	-2876650203006056
ENSG00000237187	NR2F1-AS1	-430556069107817	787567787105968	2294001545969873	49508570638033	-908640686762743											-1685888419728765	193856112837843	-3557879963652541
ENSG00000048707	VPS13D	10304125046862	6741431337561299	8215368455670101	582715393158779	-377107581491112	-166930242774815	5582106368758104	743868408830464	391704091655892	-724524341276634	131086331115962	2285637714349605	3333811429608271	34435045772399	-82297123004579	403469056374901	2281684555880864	-1476605139825783	515359522242602	1353797042497649	-323547128312419	-582852518553443	1367671385090504	-252974434138948
ENSG00000234104	nan	-132537099371141	5886168327222316	7892248580211404	347646378217339	-612110048879031											-518963213031133	1361246641840955	-2396782479789765
ENSG00000253982	CLN8-AS1	207453517120234	3972051024169184	6771698230194347	686732068809496	-272780419939634											812306473509319	2688972994066401	-1068100960829376
ENSG00000105270	CLIP3	1492104972187223	855652	1.74344e+08	1958044683302689	1019443428964977	209843779935256	79.9048	28837.7	2625944332355967	1558425351993555	-1029788052952387	2.26611e-06	0.000215916	-818225388545049	-1240423081355715	5842496887438441	7666933748563317	3991739972501146	-4048561543088749	-3216813238554338	-487666289188207	732689137719814	9168729657689862	5441387529833636
ENSG00000237506	RPSAP15	212015748041753	3869029902718868	6664051264783769	691274639865007	-268219520936872											830170377494357	2706759917739665	-1050242272114937
ENSG00000013588	GPRC5A	89090259648663	7162036442619993	8471128974125385	568809366883002	-391039278565038	594592736039049	368176800711106	1437531876986023	1149047851074514	36444413231297	300279660820679	58008878288184	132462103795342	513311230347484	86974947018351	34884245706614	2227234020062484	-1531156192404766	1180534852278523	2018058085702495	341937765447117	2076076018061289	4012007787232695	127249069347598
ENSG00000108684	ASIC2	1751232732720107	519.012	154605	2212597610166054	1282046332234444						305193431842172	50472549460099	116731812806056	518216425714788	91892832229117	6857139397571638	8663663007301384	5019989776357203	1199853103575113	2037342622232579	361272191478328
ENSG00000198755	RPL10A	-1289449988783451	1.21663e+08	1.77403e+10	-814528674348105	-1758529003925233	-757659392165569	7760490271894	423223681693528	-200237053363587	-1310386045224952	-3329454009808772	8.3744e-207	9.86225e-205	-3138387856945592	-3517824742594362	-5048979586825987	-3189374295584774	-6885708729220851	-10	-10	-10	-2645438463329175	-69914635551165	-4575335146231987
ENSG00000272189	nan	-260124253893101	288389515035003	5660813876511902	220112886641221	-739163739066554											-1018544386652572	861875591233578	-2894274816652663
ENSG00000215414	PSMA6P1	-38773065445844	8742897445201933	937906262398234	441271383382297	-51863887870989											-151820092021894	1727845380843106	-2030786098196103
ENSG00000067842	ATP2B3	167849944084488	4933652811077491	7505020524945326	647290805870395	-312364031475022	-657492324379559	209299251203787	93187320088687	-99588574549819	-1211315394446725	-152139229732646	1622717827112784	252602312442257	61241086162599	-365381061977489	657234440035957	2534536503166869	-1223094832909348	-598127967133459	240766345641753	-1436477838186168	-2295695799778711	-347722800438332	-4229420724968531
ENSG00000166922	SCG5	5494593673408447	3.89878e-125	7.63345e-122	5821043560076886	5150459148164339	2703158625159982	2.43106e-07	0.000172477	3212941725326438	217775359967869	4777639496445691	0	0	4940637091999555	4611284615963786	10	10	10	10	10	10	9438330565716176	10	7603829894825108
ENSG00000162419	GMEB1	-223396673439332	3619221009149249	6471329420842454	256841046577501	-702605655629363	113132564968809	6915236728567017	8328659443637868	670978083133741	-445418051551799	-675460885122395	518456	2.6295e+06	-462767373125666	-887542225918534	-87473361027687	1005688636635139	-2751127724005818	-2655541551027932	-1819347374308097	-3489329006507031	395012906747115	2342782584796345	-1555218688002181
ENSG00000162595	DIRAS3	-809403011107355	9330855531082	58059281582236	-330725493336056	-1284375760141116	1360575617744766	1.57482e+09	2.26983e+11	1904379862873951	808447021901021						-3169304211985869	-1294991104131243	-502911090090804				475057672176696	6649319984850619	2822768211435993
ENSG00000170515	PA2G4	142956713107592	5596468080722534	7892248580211404	622491927451495	-337237008084777	148147433765193	6033346230729706	7759877542898922	705832963836838	-410461340501902	-676329212505605	492657	2.50368e+06	-463637813925341	-888407660143468	559762327006531	2437433837687508	-1320487637794116	-2658955337816772	-1822769469890772	-3492731418985109	51727058831247	246448165300584	-143316406963526
ENSG00000084774	CAD	-43132151195368	8602944953958106	9305917213576488	436920629214445	-522986213535699	-217714570414669	4450608280836125	6571467488609735	340969152389246	-775041855938108	32110217294503	7680504294456277	8268395902344453	245453837866445	-181262637836484	-16888855932037	1710809536745339	-2047808553493742	126239754390274	964989801290281	-712625226753861	-760170737085369	1190525610671957	-2706130957511642
ENSG00000278601	nan	23291628796413	3418211158418795	6260272995912376	71208257336042	-247322526411805											912008680910284	2788235610768668	-968417851082043
ENSG00000169213	RAB3B	5339763835305904	1.66018e-115	2.55395e-111	5674300344949117	4987628718164002	2283348743699493	3.58823	157.338	2805851196589553	1747353370281584	3225976635786442	2.47543e-191	2.63425e-189	341582608559052	3033495621517527	10	10	10	10	10	10	7972525193031575	9796891260887496	6101047334157015
ENSG00000235559	NOP56P1	328484154411283	179971540625359	4179455282702669	807173893829019	-151717373170742											1286214901427163	3160575864447879	-594065630128584
ENSG00000274828	nan	105305971133064	6674060969770927	8191671003929815	584972638942443	-374845816751472											412336812785856	2290523043595243	-1467748957655104
ENSG00000253477	nan	542797912546471	266207682899413	98223657128742	1020102645055855	62999711059726											2125383383658425	3994321203735473	246682118642377
ENSG00000156650	KAT6B	714040552632165	35164389127378	181745967995284	1189924860534513	234883196925548	1387800765699941	9.64145e+08	1.45481e+11	1931108480424804	836008583189657	553680943818134	3.5686e+06	1.41885e+10	766136316082919	340723015472485	2795902288391269	4659278283730689	919710323689554	2176769646779755	3012027588749278	1339535930070568	4845635866172986	6742645447019759	2919001974385808
ENSG00000071626	DAZAP1	-276930635660528	2583548207760697	5294688148305465	203301915609878	-755888267087925	2643577218514749	2.16242e-06	0.00144446	3155280010194796	2116544477026561	-70760753709565	5157360849878756	6290421261049471	142621215330113	-284078301596315	-1084351575151757	796050432979822	-2959761498039095	-278192454658206	560708357373778	-1116839998067043	9230296525000276	10	7390112531792419
ENSG00000198225	FKBP1C	234135580232931	3392990810182581	6233877734798854	713296334440468	-246103311401728	3631748325456192	1.24994e-25	2.4199e-22	4106753459897378	3137083188454937	1379255821927698	3.14123e-22	4.92804e-21	1587943281018927	1169336492537099	916782950427599	2792988222323792	-963643884079539	542247704537695	624292162033525	4597189432372322	10	10	10
ENSG00000161021	MAML1	-168235605971905	4923724818963493	7498922383566703	311978636589497	-647674959410447	-615273133191352	307281516784468	1251978999632812	-57200312017554	-1169525250570119	-101414109279555	3515964302916306	4699925040561222	111970555376038	-314706450594393	-658744540477171	1221585777942649	-2536040697512366	-398704628179241	440206781535341	-1237253073179057	-2148283554362338	-199720226648493	-4083506538274103
ENSG00000123609	NMI	-324493404518498	1853233467457285	4265740815789558	155711437594449	-803204786293692	74954529012851	7926425949209048	8939534005217254	63295896596054	-483517095246486	412323796321253	1511042574247	4459165899445	625134280019494	199138548905295	-1270588692640415	609704817316286	-3145034398630588	1621030910487524	2457684955751194	782903499931895	261710731895721	221003528970332	-1688245054002748
ENSG00000267651	nan	722435235719479	314702988432	165796434977009	1198242758362369	243316585842108											2828772569452507	4691847903881504	952732161572269
ENSG00000213509	PPIAP16	-205201543835862	4023506961847287	6793121477236788	275031662069275	-684489726614117											-80348863083083	1076915940593177	-268019286294877
ENSG00000253683	nan	-130090531109721	5955180819934756	7892248580211404	350090390210059	-609672190548264											-509383412870492	1370816432657615	-2387236784295805
ENSG00000113396	SLC27A6	-253997564590459	2999012942962351	579491352861137	226240573566145	-733066218907408	336717985995605	237458852682611	4816434747392258	893308049096308	-22196856643033						-994554678255235	885869205927848	-2870399323161959				1175682266541284	3119068406089922	-775023961105351
ENSG00000101447	FAM83D	-7601284784613	7564302179180324	872075242401406	404096909997199	-555772413650358	390377931166818	1707479513836192	4038866172456803	94658428056122	-168258061182519	-338492931935879	18698099976112	46904563487364	-125222932452598	-55145510228468	-297636449998118	1582284747313265	-2176186432859721	-133076846533033	-492307856152443	-2168018859268174	1363040972001693	3305087339341273	-587488720419847
ENSG00000160633	SAFB	-559474694933671	22295830508537	849885489667898	-79726451865187	-1036653333079035	212345305478275	4563710258351387	6647056746653467	769702152845707	-346334557255324	-939288488282745	0.00503148	0.0411106	-72738578358814	-1150343555985615	-2190683111898643	-312177464421999	-4059127195983223	-3692766915119098	-2859681758767284	-4522519627947801	741423447565281	2687486885928209	-1209259422396361
ENSG00000112473	SLC39A7	-37454815118249	8785300649523089	9396380345262524	442587078260679	-517324146213082	285025511311968	3173618367749836	5725897299892987	841955081473162	-273679267291539	561783163472794	2.40069e+08	9.7133e+08	774215607567076	348840855412238	-146658341622692	1732997125107116	-2025638122240259	2208623128487443	3043790929472045	1371450822167839	995193167868724	2939764727997747	-955576698177549
ENSG00000213614	HEXA	-6.93104e+10	997743449444904	9989958470801904	479270820205398	-480653835075789	-171423753323879	5476633336028416	7371336155162267	387216112328528	-728995397659331	1233561220851816	4.80016e-15	6.13566e-14	1443123455352164	102289296845025	-2713923350763	1876636247103636	-1882051590009234	4849685821726247	5673569533573002	4021453854403036	-598542029915392	1352001186505227	-2545355451934409
ENSG00000179886	TIGD5	422348263779153	846369136567448	2423325192003872	900485208836642	-57731093587169	149135119283364	6009214598652844	7748368489855163	706815939029722	-409475097122832	-37817459569529	7283311529785592	7954723517600005	175557142433921	-25115763102602	1653749878554195	352594631602923	-226052282432264	-14867749925002	690194349638069	-987413986120726	520719184457995	2467913802611115	-142972050885297
ENSG00000037241	RPL26L1	-14642315641064	5501644113686208	7892248580211404	333773741703138	-625945586820237	1151808122326444	4.95892e+09	530865165967	169915155056608	597380093052862						-5733355571653	130692684721151	-245095701098179				4021645531863836	5932746183011267	208580833515736
ENSG00000130653	PNPLA7	109708935466912	6.96682e+09	7.47233e+10	1568791034023966	620393779911273	595993668235965	363749802532303	1423409427689357	1150435180605961	37850308222671	145379974263275	1817534103716982	27685384101199	35862917020363	-68001555423921	4295770913825434	6142769378947078	2429218316191614	57155428367039	1409933104733131	-267344801068724	2080967503544819	4016851777740504	132157882891046
ENSG00000198771	RCSD1	-43374426932498	8595178887954571	9304136570905788	436678811200828	-523227830827474	546772249258808	549187090477311	1917203404944099	110167871473121	-11532249929827	-2845188147271	7938421260192412	847888092153691	184919780830481	-241797639869884	-16983721592729	1709862672403876	-2048754631887326	-111857185397215	727003106202573	-950615637052935	1909106326440376	3846614027776894	-40265926679653
ENSG00000122707	RECK	197764920816312	4196242247350986	6947896336776597	677084564037931	-28246552458761	-287118435922663	3138193957881962	5686685251670771	271586185403409	-844034834925259	5726734550906	5988929682642665	6985932668800651	270594719398034	-156112165927018	774369736614504	2651197155469206	-1106024025771227	225143777924054	1063829951781761	-613747372159149	-1002500809433301	948268507464133	-2947026381233105
ENSG00000140015	KCNH5	-151414656387979	5366506084393472	7843805955747146	328786613737973	-630918476854258											-592880310131643	1287399213327265	-2470428894721144
ENSG00000167895	TMC8	-342576589827679	1619897302192708	3894588992780124	137612007084755	-821188689641754	51683051748243	696452185637684	2275847544112846	1072006747314969	-41558689496462	-298959508900604	60199486852569	137056828876226	-85653707349846	-511993364877262	-1341395342208101	538834557925429	-321545229904213	-117534473934283	-336743376081483	-2012876961832968	1804561976143975	3743011584915049	-14510604212964
ENSG00000159208	CIART	400487257202459	102040829013329	2796352378750562	878760444388044	-79628132977875	168382282252383	5547916052077908	741746018667524	725969149391315	-390253864193148	-24021441837655	8253791050289307	8717160044443418	189348699446899	-237369712842092	1568150765045859	3440880673170866	-311792486284533	-94439127891076	744415183898068	-933207457739797	58792244987608	2534789023733855	-1362607780586699
ENSG00000070388	FGF22	-39280810831748	8726574712383947	9370542825784428	440764617826756	-519145264709286	-8949707846569	9749602328832352	9882052856618284	549347036876868	-567190666470713						-153808223481845	1725861086013923	-2032768906832533				-3124874002446	1918096437656777	-1980399135334735
ENSG00000261519	nan	-70189087988918	7745663017907081	8833425513584999	409911333366601	-549966144684984											-27483289430118	1605051744991843	-2153451364623803
ENSG00000222037	IGLC6	83567417379581	7331036818887755	8574431568665772	563303810598986	-396553967234218											327217176426785	220567642454973	-1552749546750102
ENSG00000273167	nan	-162270477431921	5078473729806499	7628868572144979	31793947558865	-64173300186151	-114229854621678	5.72767e+10	6049400018968	-587777566312168	-1689791868435674	44778271843111	680866590190064	7576383190996838	258114048592051	-168598272623941	-635387440556152	124492608170695	-2512774326089405	176043593465902	1014762802758048	-662835892123172	-3988441959558665	-2052280217050922	-5900065979520963
ENSG00000137124	ALDH1B1	52492660002328	8303948566412052	9148006684432394	532320874363822	-427577395923109	-34680241325936	9031930068768002	9540755976475446	523690447369622	-59283476053665	-234011923677508	2.64305e-91	1.25847e-88	-2137430753732382	-2540793773186703	2055406344685	2084359418111301	-1674225105729588	-920006473282306	-8403204839837292	-9989006892779178	-12108929852891	1828514061430543	-2069937882561716
ENSG00000255321	nan	-131419025398205	5917661051311889	7892248580211404	348763291109738	-610995962416196											-514585274596125	1365620033940719	-2392420154877792
ENSG00000074800	ENO1	957297790336993	8.92143e+10	7158745978124	1430686589273749	479538782267195	819794103701459	39566661347956	243320231011184	1371785208317805	262727219097696	-1513653236857512	1.34992e-29	2.56413e-27	-1304505749911101	-1721454173377849	3748402065973272	5602006628581204	1877685481266904	-5950853932266843	-5128600780215519	-6767813186942679	2862387606314241	4789716053195732	917336599996471
ENSG00000112769	LAMA4	-102748315777978	6750164724741935	8223061179504259	377400130248841	-582423421738734	139552395626048	6245153956904116	7907537496584489	697278458633132	-419043369357539	-46507071332163	6692629149555459	7538916842679325	166869923522028	-259841724575	-402322039207744	1477750645831268	-2280541310502938	-182840284403441	65604097186072	-1021555076686098	487260210664955	2434612799884452	-1463129024155539
ENSG00000173041	ZNF680	-217213340677159	375366635756324	6581139070566551	263023202054406	-696449592520211	509674388134732	736071852226243	2363395848785457	1064913627592031	-48733573651852	58442029568987	5914177151648622	6918803932706815	271768578892341	-154937726689359	-85052210834478	1029895528780624	-2727022999321888	229761991057004	1068444923175161	-609130121533014	1779575682803309	3718245295558526	-170157819631333
ENSG00000203497	PDCD4-AS1	285092809185206	2445781421590142	5119027645946248	764009715531716	-195136533507225											1116311440108684	2991561899578396	-764078004492056
ENSG00000181123	nan	359796614499469	1418971046322876	3547345261132418	838311274580721	-120373587170481											1408822193818326	3282497614938485	-471335677772334
ENSG00000183773	AIFM3	88564973765588	7178052220948609	848111206290159	568285737651054	-391563801533351						58815183844118	5890521030618359	6898896373789917	27214147000174	-154564648953102	346785643910171	2225183693701501	-1533210018286243	231229028903873	106991092639878	-607663384594998
ENSG00000196196	HRCT1	-235893634696708	3356836930563801	619377664397934	244345343184843	-715046388697916						-31521169532494	7721868045352367	8303816827244753	181851497391525	-244865138181797	-923666801044025	956760371172059	-279984074727517	-123923941821391	714940299396222	-96267535717058
ENSG00000274443	C8orf89	-280349848081195	2525196000130029	5220064750853697	199881437057188	-759290496727345	665733457133984	193729346792951	877254098609507	121947048824569	107865049373163	263324692243627	155574232958076	324350150502115	476417463017565	49992342740148	-1097739867730096	782657182725889	-2973083292717874	1035248194331615	1873012037476025	19654245908797	2324470483753319	4257894995902039	376620884544263
ENSG00000279847	LINC02906	-137037989165204	576018096874541	7892248580211404	343150041101343	-61659476578343											-536586929259334	1343640752111513	-2414342869335673
ENSG00000178585	CTNNBIP1	915217070504217	1804159877361	13538742605829	138907760318101	437175118471383	863956387260611	23848212698581	159162260911219	1415398927985013	307168626540839	28247238264707	7952918538210879	8488206511841894	241593114563834	-185124355626798	3583630498806808	5439082185416898	1711806016697662	111052640598312	949811555779814	-727807382044266	3016584340049577	4941997424917017	1072507920817216
ENSG00000132823	OSER1	-694913870123909	45094760413586	224452474006799	-215670872593378	-1170970632671185	691084580722174	151992228135015	727632533894471	124455225488535	133329684276207	-698921654945006	1.27673e+06	677482	-48628637929872	-91092370194828	-272100971373702	-844482409297834	-4585060973715991	-2747776424216416	-1911811200870179	-3581252140013279	2412986297220795	4345470324450601	465533033359052
ENSG00000067840	PDZD4	923007096568411	1587117581396	12014675342895	1396781563548152	445016226947163	435092488362207	1267877866998027	3367593288172297	990954768778931	-12347673255065	-183355395409921	921302928057181	1562182398169525	300167841294	-396560694481409	3614133180509156	5469247867661089	1742508717055707	-720852801162531	118009523925894	-1559059043824652	1519166020669426	34600110390691	-431130533051344
ENSG00000105514	RAB3D	235465647067571	3365615477663327	6202212761396001	714620351386874	-244773312552853	-986269664149357	5199492822066	42866262547858	-430370001465574	-153608123574721	-244797075949578	245217784986952	488252048218498	-31453067152958	-457918341886137	921990969626193	2798172552536802	-958436131086492	-962407773821649	-12365620063524	-1800283644309182	-3443652559097814	-1502677017024645	-5363370963077657
ENSG00000183655	KLHL25	-278582781538892	2555237164604032	52589819069383	201649171979249	-757532220897679	144480710250516	6123311533802349	7828554244215934	702183632377711	-414122614946941	-174474863393559	1090066178067933	1801311415862491	38900054290573	-38769097815895	-1090820729354618	789578938213922	-2966198575319591	-685939422336146	152933667635159	-152418818637174	504467881026819	2451739671704958	-1445947750985829
ENSG00000272040	nan	387319245454663	1138267376694223	3035144792851737	865672302294084	-92815627482464											1516590004184996	3389632650497085	-363429533967064
ENSG00000197134	ZNF257	-317082294063131	1955723423124341	4415600730037627	16312829684702	-795833464499562	509674388134732	736071852226243	2363395848785457	1064913627592031	-48733573651852	58442029568987	5914177151648622	6918803932706815	271768578892341	-154937726689359	-1241569695602644	638746324385453	-3116171198358973	229761991057004	1068444923175161	-609130121533014	1779575682803309	3718245295558526	-170157819631333
ENSG00000137992	DBT	-161159624378933	5107570780120567	7651763487163095	319049492095164	-64062642626339	382653170660172	1793781610266457	4159454007971702	938916721179688	-175992087264465	-279101016282531	103430449901587	224542079084617	-6577975080474	-492168371111629	-631037776406873	124927247026888	-2508441410772961	-1097272043425702	-258609884488866	-193493596502163	13360692499118	327831534031703	-614492794130451
ENSG00000163512	AZI2	326670080899968	1823899151424884	4217448574644377	805369677094841	-153532972364558	405613301679161	1546429058504677	3812666937355854	961704900567752	-153002456745584	-142903216802062	1893101720731442	2859726517592006	70478708817731	-356155062242633	1279111702228043	3153511260515725	-601174803301002	-561817032417302	27708360891152	-1400206269861019	141623668972549	3357882394966906	-534222354060352
ENSG00000141744	PNMT	3481377926259402	1.00698e-34	2.43679e-32	3896236855545038	3052419395690358						-39260738952349	718396463014497	7872990582015689	174114282795661	-252600016173137	10	10	10	-154351681804834	684521817288536	-993084653031454
ENSG00000198792	TMEM184B	475192627449406	52324174856665	1678941826412389	952981449137281	-4780605837342	419215486080877	141261983407395	3608509544545666	975202467110154	-13938000955111	68295334407025	5304713254667699	6420098632755885	281614735589879	-145086243604491	1860667646417098	3731500969539371	-18718974365321	268499778823372	1107154608375521	-57039949590045	1463729985754918	3405010407978869	-486658308599332
ENSG00000268635	nan	-169200555199956	4898931338724384	747691265190662	31101434916027	-648636128437021											-662522902567313	121781000719671	-2539804257818602
ENSG00000105556	MIER2	-162854006653553	5063223980966871	7619778832931556	317356381057833	-64231427941984	157247114759968	5812687535129102	7615407879090996	714888838193949	-401374534275689	-426243010726841	8.95398e+10	2726013820225	-213076352858848	-639022298890968	-637672311744616	1242642912596947	-2515050380648959	-167575362356514	-837699296911367	-2512285025106768	549042973577567	2496101083308029	-1401436637825915
ENSG00000187546	AGMO	-225443893131333	3575380433336338	6433372410390961	254794135724445	-70464376627118	-211259223936168	4586782848554576	6667836727663333	347419818833531	-768622012120704	-204450500264708	603685077914334	1085514749730935	8913824829649	-417628760453826	-882749718326484	997673737877505	-2759108164593463	-803787177821554	35044267899285	-1641887118435387	-737631292521061	1213048714460116	-2683715473801232
ENSG00000182463	TSHZ2	-373279063782606	12754586606566	3292132451409539	106874742829187	-85171546124717						1679141405585907	1.16449e-39	2.76117e-37	1885745924777785	1471051191323007	-1461614168538648	41847950644518	-3334983143997861	6601462602496715	7413718200753546	5783366066474048
ENSG00000092931	MFSD11	51139800299984	8347021411887502	91686700105654	530971802268545	-428927810734373	142241384815397	6178544343357147	7866513154098759	699954855117349	-416358538766816	323423808829647	29624300352239	71579366770899	536414088491696	110139374698884	20024336735431	2079076981778399	-16795127996108	1271524942237349	2108885846570309	433007583946364	496649067323418	2443957687937948	-1453754687632209
ENSG00000057252	SOAT1	358085211458483	1438040744025554	3581714294446439	836609681987078	-122086946157756	351221422668976	2178415139762057	4588832998419934	907710915610247	-207454643821029	2058389029266192	5.45466e-68	2.00743e-65	2261816049818724	1853167310155088	1402121011846218	3275834846824071	-478044518461703	8092456152225521	8892219569438311	7285636965094991	1226322368971124	3169357358424117	-724347246051791
ENSG00000257740	nan	-87529475080391	7209660450387596	8499762861448368	392597788531774	-567253497001108											-342731037861683	1537258705163201	-2221141844839114
ENSG00000166341	DCHS1	-166036490139574	4980479272809311	7550121918666441	314176210784491	-645484425404577	-1240712092994914	1.22057e+10	1488724395002	-687202715254934	-1786606434727444	-233117482792088	322322525370157	624734190329584	-19766877714137	-446255960525574	-650133666815463	1230190615158189	-2527463426911651	-916490022532177	-77712516387188	-1754433560360506	-4332062040892822	-2399432401733334	-6238103071289519
ENSG00000250064	nan	26602623295482	9135588693076842	95610261428483	506500281978461	-453417600170249											104165421802541	19832561221266	-1775405194060361
ENSG00000106615	RHEB	182290653291331	53.8059	1774.61	2282895208466081	1354797686503155	-42750297337025	8808182628493569	9433356717825492	515642064156845	-600876188592161	251204272679308	2101365908583	425202799726856	464315849802739	37864130000192	7137785841585452	8938920785351849	5304855498806215	98759735550753	1825435134898438	148860981773671	-149266652091354	1800412380465648	-2098015278946046
ENSG00000032444	PNPLA6	675573256855208	57652525420824	276539518928353	1151800875746065	196247258088099	54055100448214	577441313985697	1986019968244939	1095514335123038	-17771923829426	21467194325605	8436932970112212	8867639728507897	234816875862815	-191902032004197	264527947026903	4509999736567381	768427165595008	84397228279629	923171103569204	-754453486409499	1887384269811549	3825090521189838	-62052330310776
ENSG00000173230	GOLGB1	-1153935765069173	2.24924e+09	2.67054e+08	-677726996947706	-1624898663658054	-1248447859580949	1.07535e+10	1322910015139	-695022662352873	-1794212035432331	1438284889488516	2.23689e-25	3.7633e-24	1646592377281921	1228694987051598	-4518359124450795	-2653712670359722	-6362464814327998	565454694768933	6473497684008273	4830554460698356	-4359072191735856	-2426736476688385	-6264658735813023
ENSG00000149743	TRPT1	-40894149099215	8674746212696661	934468791048197	439154376530513	-520754267209638	15090424482105	5966099614906848	7719541495361382	708576600437749	-40770852750946	508202126330383	2.98653e+09	1.08308e+11	72078101856834	295161734133499	-16012542232627	1719556013692146	-2039069128516271	1997971892253296	2833715446977554	1160413972931884	526896251346159	2474061316200805	-1423552366213036
ENSG00000139797	RNF113B	129225531555529	5979668529564179	7892248580211404	608810256753578	-350954472236717	229222430900809	4213652184517813	6389506279934226	786485280071698	-329468480253454						505996414437269	2383861790172403	-1374199838413472				800351505746662	2746086740635589	-1150369940806634
ENSG00000125740	FOSB	-1413849323675967	6.32093e+06	1.1288e+09	-940267597140654	-1881046973897706	-58238231869724	838156824158642	9197661950189344	500193691627068	-61630715172586	1478379516868592	1.35883e-27	2.43692e-25	1686420516169594	1269021926799888	-5536078511135275	-368171851984432	-736544096761033	5812177021207917	6630080071006391	4989097858970751	-203344220658434	1746472946323216	-2151893926557638
ENSG00000281538	nan	219190515109136	3710344952736229	6540861033566355	698418086940802	-261046444019211											858263946673899	2734730850136422	-1022155320897719
ENSG00000182400	TRAPPC6B	-41493025676858	8655521647902673	9331429630619206	43855664321117	-521351527995583	1420121602062908	5.31849e+08	8.44929e+09	1962829386171254	868739762849315	776974126774691	863.105	5305.06	988695548137544	564549575138859	-162470387731559	1717215524837222	-2041407767116046	3054635913299352	3887008363067292	2219499141130503	495848708212264	6853401949243598	3033285942244118
ENSG00000183048	SLC25A10	-26363277978879	914333579752511	9565260750536664	453656454838703	-506261548720676	-374800525504876	1884788893595267	4287791503105345	183853466238994	-931121547698995	-573757144689068	1.32307e+06	5.48253e+07	-360838435810496	-786155193233836	-103228239571168	1776340455106337	-1982321336477108	-2255698252082915	-1418618724797166	-3090730828640883	-13086510066385	641941532348537	-3251097764758166
ENSG00000112936	C7	1241341677516213	3.55276e+08	4.86432e+10	1711109265614376	765942813748572	466384206819267	1016596966940279	2930862911376914	1021992562830762	-92124954505684						4860606339582702	6700031663164157	2999131152764744				1628423975425809	3568382393071481	-321662874639755
ENSG00000147251	DOCK11	44030346413542	722095390474825	2143888671719921	918325106110146	-39742854011937	212130046658141	4568278008704654	6648868811333275	769488072521154	-34654965460747	1497453128583294	1.13846e-27	2.10146e-27	1705364971075488	1288208482567487	1724055389326034	3595800345226574	-155617403058641	5887163996104896	6704559272204046	5064528867907324	740671851309442	2686739404499654	-1210010454871655
ENSG00000277476	nan	-77354655752133	7522701429601582	8694200197978496	402757207149225	-557110145622111											-30289044261961	1577038997272028	-2181424465723948
ENSG00000267423	nan	-333615688000899	1732595723006001	4072791321368723	146581352344548	-812277375341381											-130630797100602	573954990294129	-318055909311266
ENSG00000100626	GALNT16	1759740179156748	398.576	12065.1	2220944214455668	1290679040507553	225374448381406	429205106983975	6451054362442354	782659007114312	-333314223796865	-5116508058915	9625180463446702	9733730987336042	208246202019458	-21847455979574	6890451215608987	8696345030678913	5053792070536192	-20115302078751	818709794285455	-858922084400188	786915915733119	2732726951583501	-1163797713226587
ENSG00000244879	GABPB1-AS1	-44610801065995	685268650119458	2059822877546793	33926962009384	-924091721240504											-1746783713160279	132844654789607	-3618380144622849
ENSG00000228331	RPL17P43	-60803585558957	8040504511401896	9004177707054006	419281104992299	-540608147496438											-238082953944294	1641740089699188	-2116809123986677
ENSG00000163877	SNIP1	-484243939494871	479879025098503	1569939835703111	-4291584004048	-961970468740272	119954860882829	673960912610522	8225576379119307	677770275115719	-438608159790552	-131860539686685	2258268363456016	3300372261129255	81522832539249	-345123879884544	-1896109028517276	-16804156981714	-3766698438906834	-518403285507064	320503043083301	-1356837714028858	418833589504807	2366498156866378	-1531441315501301
ENSG00000133112	TPT1	-961058176800118	8.36544e+10	6775720071149	-483325289744767	-1434404006682691	-2267809692432343	0.576262	247.923	-1731461538237328	-2790746781443774						-3763126262069321	-1892511956993708	-561656257474176				-7918269145616565	-6045559519741517	-9744152786045224
ENSG00000225194	LINC00092	137653450776257	5743052475609483	7892248580211404	617208000828462	-342535186925229											538996835139913	2416744056858435	-1341233224707521
ENSG00000178977	LINC00324	289632178884357	2371431356537992	5011137865557176	768526161123531	-190595102140471											1134085828528116	3009246526199393	-746295543392231
ENSG00000230457	PA2G4P4	124928056480639	6101999201552553	789372724830496	604527906887818	-355247282434554											489169190336484	236709379044853	-1391008796688345
ENSG00000171314	PGAM1	2042641078350082	0.00281999	12.4848	2498112147344329	1578150793140633	2295755064934502	0.245184	109.186	281790864837733	1760043355544607	540803097011016	6.62647e+08	2.56309e+10	753294337656875	327820919671042	7998179997296337	97816257685522	6179418518602541	2126141019664097	2961539976425753	1288811969215505	8015843021231003	9838990978859648	6145355601778338
ENSG00000154447	SH3RF1	-912451416630681	1887704713549	1409202648725	-434391470721822	-1386342366815266	-882915714527629	19054350791501	130968900899864	-326254541172705	-143411618537387	237667364777017	290114259234141	568167227203004	450799206588548	24319260047991	-3572801284744086	-1700906345685444	-5428372074364964	93437766181578	1772295110840346	95609985670734	-3082782600256789	-1139148172620393	-5007350475557606
ENSG00000204604	ZNF468	190240816564144	4375363817961875	7105965654735307	669591752817902	-289986295297443											744908300258847	2621858250333724	-1135472409284706
ENSG00000274776	nan	246104603288017	3151770968098717	5971119927862604	725210308004892	-234134288272339											963648942598721	2839638662316051	-916777891617476
ENSG00000273687	nan	-450461415863942	658672414723802	2002799349979744	29564834582998	-928416467524002											-1763829937674093	115764277479483	-3635314152062861
ENSG00000163273	NPPC	321207503952111	189817442840853	4334745272466813	799936591632266	-158999952243418	15718624612014	5814150943573688	7616507730141688	714828265634947	-40143531986479	135498692105671	2132786381612869	3151457250622445	348758302607762	-77884261018081	1257722396910962	3132237432269076	-62258134876617	532706504435633	1371126269840282	-306198176474929	548830445042084	2495889588566377	-1401648876382035
ENSG00000230223	ATXN8OS	973330449013725	6.76989e+10	5648788149306	1446535117291732	495683765015768											3811179658811705	5664063238096966	1940902891043386
ENSG00000198846	TOX	-825737192390169	7326468472141	46933418050121	-347150699637444	-1300545166006148	3190030324094384	4.50473e-16	5.47396e-14	3682714310140113	2679479774453996	539851119781676	6.93291e+08	2.67518e+09	752344983968716	326867178043623	-3233262448894499	-1359305759252808	-5092423942013786	2122398367581901	2957807638667852	128506238048825	10	10	9355653649053132
ENSG00000103353	UBFD1	331280133645307	1762909011504925	4122898401648558	809954619664989	-14891898043032	-127743079519058	6541267310000524	8105784078368781	430833466975668	-685523495607685	13717833301786	2076583673372078	3085600552730475	350436202583629	-76204407552156	129716285768803	3171464094394368	-583108223524825	539309930823996	137772285182234	-299593914441912	-446026881575283	1504295250098117	-2393569249650557
ENSG00000187994	RINL	192478060579944	4321649178045482	7067762043250478	671819748533465	-287750099286266	22412393464541	4317710165011959	6469131556168699	781415513182584	-3345639742949	188235101372542	837911360597226	1439854492699417	401434314367617	-2513543023677	753668468908102	2630582206272508	-1126716344209839	740037127340339	1578219442889649	-98818718991569	782549630341117	2728385176493104	-1168161333702031
ENSG00000180071	ANKRD18A	740531408066835	24680069787533	134056661542022	1216171135237751	261498514923206											2899630071159639	4762048384439986	1023925452958616
ENSG00000146910	CNPY1	-173010127907765	4801706657272287	739836573742118	307207301889649	-652430690207244	31918611456995	2627950055365045	5115500938549288	875894639514835	-239509970014425						-677439692674391	1202903105709525	-2554662270991243				1114468101597052	3058267861728074	-836271408470201
ENSG00000167851	CD300A	109085347597804	6562229204717285	8137949786010973	588739432072735	-371071263596243	-14975038417881	9581147346320284	9802017686294174	543339682784259	-573196416038989	-78110474230474	4731018243096502	58913080491309	135272506596289	-291422343438067	427135366267877	2305272325683015	-1452969290358259	-307087522694869	53181726712873	-1145712740653353	-5228674392495	1897121200309026	-2001368770336062
ENSG00000273063	nan	-283427695205	2473459659243319	5151955014866233	196802354064509	-762352961215314											-1109791507913617	770600703365378	-2985074700542635
[truncated: 23,031 more rows]

## Sheet: Sheet2
Shee2: Alpha lineage drivers in human, pig and mouse
[truncated: 23,780 more rows]
