# Supplementary material for: A multimodal cross-species comparison of pancreas development
Source: Research Square preprint supplement (doi:10.21203/rs.3.rs-4151759/v1), 2024-04-03
Supplement: Supplementary file 11 [file d95c2e32cf3d0d5847136e54.xlsx]

## Sheet: Tabelle1
Supplementary Table 12: Thresholds used for low quality cell filtering in the preprocessing of scRNA-seq, scATAC-seq and multiome raw data
Pig pancreas - scRNA-seq
Sample	Lab	Age (embryonic day)	mt fraction	min counts	max counts	min genes	min peak region fragments	max peak region fragments	TSS.enrichment (min, max)	nucleosome signal (min, max)
E22	Lickert	22	0.15	2000	40000	1000	NA	NA	NA	NA
E23_1	Lickert	23	0.15	2000	40000	1000	NA	NA	NA	NA
E23_2	Lickert	23	0.15	2000	40000	1000	NA	NA	NA	NA
E33	Lickert	33	0.15	2000	40000	900	NA	NA	NA	NA
E40	Lickert	40	0.15	2000	40000	1000	NA	NA	NA	NA
E54_1	Lickert	54	0.15	1300	40000	800	NA	NA	NA	NA
E54_2	Lickert	54	0.15	1300	40000	800	NA	NA	NA	NA
E54_3	Lickert	54	0.15	2000	40000	1000	NA	NA	NA	NA
E63_6_GFP-	Lickert	63	0.15	2000	40000	1000	NA	NA	NA	NA
WT_E63_3	Lickert	63	0.15	3000	40000	1000	NA	NA	NA	NA
WT_E63_2	Lickert	63	0.15	3000	40000	1000	NA	NA	NA	NA
E63_4_GFP+	Lickert	63	0.15	3000	40000	1000	NA	NA	NA	NA
E85_GFP+_2	Lickert	85	0.15	3000	40000	1000	NA	NA	NA	NA
E85_WT_1	Lickert	85	0.15	3000	40000	1000	NA	NA	NA	NA
E85_WT_2	Lickert	85	0.15	3000	40000	1000	NA	NA	NA	NA
E85_GFP+_1	Lickert	85	0.15	3000	40000	1000	NA	NA	NA	NA
E85_GFP-_1	Lickert	85	0.15	3000	40000	1000	NA	NA	NA	NA
E85_GFP-_2	Lickert	85	0.15	3000	40000	1000	NA	NA	NA	NA
Pig pancreas - Multiome
Sample	Lab	Age (embryonic day)	mt fraction	min counts	max counts	min genes	min peak region fragments	max peak region fragments	TSS.enrichment (min, max)	nucleosome signal (min, max)
mG_rest	Lickert	45	0.01	3000	50000	2250	2000	130000	0, 15	0.3, 1.5
mG_only	Lickert	45	0.015	3000	40000	2000	4000	130000	0, 10	0.4, 1.5
mT_mTplusmTmG_mG	Lickert	85	0.2	1000	30000	750	2000	70000	0, 10	0.2, 1.4
mG_low	Lickert	85	0.05	3000	30000	2000	3000	130000	0, 10	0.2, 1.4
GFP_low	Lickert	63	0.01	2000	40000	2000	3000	100000	0, 15	0.3, 1.4
GFP_high	Lickert	63	0.01	3000	60000	2250	3000	130000	0, 15	0.4, 1.5
Human pancreas - scRNA-seq
Sample	Lab	Age (week post conception)	mt fraction	min counts	max counts	min genes	min peak region fragments	max peak region fragments	TSS.enrichment (min, max)	nucleosome signal (min, max)
10wpc_1	Sneddon	10wpc	0.175	NA	40000	1000	NA	NA	NA	NA
10wpc_2	Sneddon	10wpc	0.175	NA	40000	1000	NA	NA	NA	NA
12wpc_1	Sneddon	12wpc	0.175	NA	15000	800	NA	NA	NA	NA
12wpc_2	Sneddon	12wpc	0.175	NA	15000	800	NA	NA	NA	NA
12wpc_EPCAM	Sneddon	12wpc	0.175	NA	50000	2000	NA	NA	NA	NA
16wpc_1	Sneddon	16wpc	0.175	NA	25000	1000	NA	NA	NA	NA
16wpc_2	Sneddon	16wpc	0.175	NA	30000	1000	NA	NA	NA	NA
19wpc_1	Sneddon	19wpc	0.175	NA	34000	1000	NA	NA	NA	NA
19wpc_EPCAM	Sneddon	19wpc	0.175	NA	35000	1000	NA	NA	NA	NA
20wpc_1	Sneddon	20wpc	0.175	NA	35000	600	NA	NA	NA	NA
57dpc_1	Sneddon	8wpc	0.175	NA	25000	1500	NA	NA	NA	NA
57dpc_2	Sneddon	8wpc	0.175	NA	25000	1500	NA	NA	NA	NA
85dpc_1	Sneddon	12wpc	0.175	NA	30000	1000	NA	NA	NA	NA
85dpc_2	Sneddon	12wpc	0.175	NA	30000	1000	NA	NA	NA	NA
W8_1	Wang	8wpc	0.175	NA	30000	1000	NA	NA	NA	NA
W10_1	Wang	10wpc	0.175	NA	30000	600	NA	NA	NA	NA
W12_1	Wang	12wpc	0.175	NA	30000	500	NA	NA	NA	NA
W12.EpCAMPosGP2Neg_2	Wang	12wpc	0.175	NA	35000	900	NA	NA	NA	NA
W12.EpCAMPosGP2Pos_2	Wang	12wpc	0.175	NA	30000	1000	NA	NA	NA	NA
W14_1	Wang	14wpc	0.175	NA	35000	250	NA	NA	NA	NA
W16_1	Wang	16wpc	0.175	NA	35000	300	NA	NA	NA	NA
W18_1	Wang	18wpc	0.175	NA	30000	500	NA	NA	NA	NA
W19_1	Wang	19wpc	0.175	NA	30000	300	NA	NA	NA	NA
Mouse pancreas - scRNA-seq
Sample	Lab	Age (embryonic day)	mt fraction	min counts	max counts	min genes	min peak region fragments	max peak region fragments	TSS.enrichment (min, max)	nucleosome signal (min, max)
E14_5_1	Xu	E14	0.15	NA	30000	1800	NA	NA	NA	NA
E14_5_2	Xu	E14	0.15	NA	30000	1250	NA	NA	NA	NA
E14_B1	Sneddon	E14	0.1	NA	10000	1000	NA	NA	NA	NA
E14_B2	Sneddon	E14	0.1	NA	10000	800	NA	NA	NA	NA
E12_B2	Sneddon	E12	0.1	NA	13000	1000	NA	NA	NA	NA
E17_B2	Sneddon	E17	0.1	NA	12000	750	NA	NA	NA	NA
E12_v2	Sneddon	E12	0.1	NA	30000	1700	NA	NA	NA	NA
E14_v2	Sneddon	E14	0.1	NA	25000	1650	NA	NA	NA	NA
E17_1_v2	Sneddon	E17	0.1	NA	35000	1250	NA	NA	NA	NA
E17_2_v2	Sneddon	E17	0.1	NA	32000	1250	NA	NA	NA	NA
E15_red	Lynn	E15	0.2	2000	30000	1300	NA	NA	NA	NA
E15_yellow_green	Lynn	E15	0.2	2000	18000	2000	NA	NA	NA	NA
E18_red	Lynn	E18	0.2	2000	30000	1500	NA	NA	NA	NA
E18_yellow	Lynn	E18	0.2	2000	18000	1600	NA	NA	NA	NA
E18_green	Lynn	E18	0.2	2000	19000	1500	NA	NA	NA	NA
E12_5	Lickert	E12	0.15	NA	35000	2000	NA	NA	NA	NA
E13_5	Lickert	E13	0.15	NA	37000	2500	NA	NA	NA	NA
E14_5	Lickert	E14	0.15	NA	37000	2200	NA	NA	NA	NA
E15_5	Lickert	E15	0.15	NA	34000	2000	NA	NA	NA	NA
E8.5	Zorn	E8-9	0.15	NA	35000	1600	NA	NA	NA	NA
E9.0	Zorn	E8-9	0.15	NA	33000	1700	NA	NA	NA	NA
E9.5Anterior	Zorn	E8-9	0.15	NA	39000	1700	NA	NA	NA	NA
E9.5Posterior	Zorn	E8-9	0.15	NA	39000	2000	NA	NA	NA	NA
Human 12wpc scATAC-seq
Sample	Lab	Age (week post conception)	mt fraction	min counts	max counts	min genes	min peak region fragments	max peak region fragments	TSS.enrichment (min, max)	nucleosome signal (min, max)
HFP_12wpc	Sneddon	12wpc	NA	NA	NA	NA	3000	75000	(2, max)	(0, 3)
