# Supplementary material for: A multimodal cross-species comparison of pancreas development
Source: Research Square preprint supplement (doi:10.21203/rs.3.rs-4151759/v1), 2024-04-03
Supplement: Supplementary file 12 [file f31ffe29c409b5d330c70d7c.xlsx]

## Sheet: Tabelle1
Supplementary Table 1 Overview scRNA-Seq and ATAC-seq data
pig pancreas - scRNA-seq
Sample name	Internal ID	Genotype	Number of pancreas	Age (embryonic day)	Assay	Sequencer	Number of cell retrieved	genes detected RNA (CellRanger)	high quality fragments per cell ATAC (Cell ranger)	Cell number after QC filtering	Cell number after doublets exclusion
E22	143_susscrofa	Wild-type	6	22	Chromium Single Cell 3’ V2	HiSeq4000	15926	30284	NA	12273	11444
E23_1	MUC11253	Wild-type	8	23	Chromium Single Cell 3’ V2	Novaseq 6000	9055	30284	NA	8269	7980
E23_2	MUC11254	Wild-type		23	Chromium Single Cell 3’ V2	Novaseq 6000	8817	30284	NA	8243	7890
E33	139_susscrofa	Wild-type	4	33	Chromium Single Cell 3’ V2	HiSeq4000	17217	30284	NA	15228	14041
E40	MUC8384	Wild-type	2	40	Chromium Single Cell 3’ V2	HiSeq4000	8058	30284	NA	7638	7170
E54_1	MUC11250	Wild-type	1	54	Chromium Single Cell 3’ V2	Novaseq 6000	1386	30284	NA	1057	1029
E54_2	MUC11251	Wild-type	1	54	Chromium Single Cell 3’ V2	Novaseq 6000	1170	30284	NA	1021	997
E54_3	MUC11252	Wild-type	1	54	Chromium Single Cell 3’ V2	Novaseq 6000	1208	30284	NA	1119	1107
E63_6_GFP-	MUC11260	INS-eGFP	2	63	Chromium Single Cell 3’ V2	Novaseq 6000	63910	30284	NA	3644	3579
E63_4_GFP+	MUC11258	INS-eGFP		63	Chromium Single Cell 3’ V2	Novaseq 6000	5338	30284	NA	4829	4473
WT_E63_2	MUC11257	Wild-type	1	63	Chromium Single Cell 3’ V2	Novaseq 6000	5373	30284	NA	4472	4263
WT_E63_3	MUC11259	Wild-type	1	63	Chromium Single Cell 3’ V2	Novaseq 6000	12578	30284	NA	5404	5202
E85_WT_1	MUC12809	Wild-type	1	85	Chromium Single Cell 3’ V2	Novaseq 6000	6267	30284	NA	5369	5160
E85_WT_2	MUC12810	Wild-type	1	85	Chromium Single Cell 3’ V2	Novaseq 6000	12815	30284	NA	12202	10899
E85_GFP+_1	MUC12811	INS-eGFP	1	85	Chromium Single Cell 3’ V2	Novaseq 6000	11596	30284	NA	10706	9944
E85_GFP-_1	MUC12812	INS-eGFP		85	Chromium Single Cell 3’ V2	Novaseq 6000	10452	30284	NA	9692	9054
E85_GFP+_2	MUC12813	INS-eGFP	1	85	Chromium Single Cell 3’ V2	Novaseq 6000	12824	30284	NA	11953	11007
E85_GFP-_2	MUC12814	INS-eGFP		85	Chromium Single Cell 3’ V2	Novaseq 6000	12132	30284	NA	11501	10744
pig pancreas - Multiome
Sample name	Internal ID	Genotype	Number of pancreas	Age (embryonic day)	Assay	Sequencer	Number of cell retrieved	genes detected RNA (CellRanger)	fragments per cell ATAC (Cell ranger)	Cell number after QC filtering	Cell number after doublets exclusion
E45_mT	mT_rest	PTF1A-iCre+/ROSA-mTmG+	2	45	Chromium Single Cell Multiome ATAC + Gene Expression	Novaseq 6000	7934	30286	171044	6172	5518
E45_mG	mG_only	PTF1A-iCre+/ROSA-mTmG+		45	Chromium Single Cell Multiome ATAC + Gene Expression	Novaseq 6000	8955	30286	171492	6514	5713
E85_mT&mG_high	mT_mTmG_mG_high	PTF1A-iCre+/ROSA-mTmG+	1	85	Chromium Single Cell Multiome ATAC + Gene Expression	Novaseq 6000	7893	30286	118586	3415	3088
E85_mG_low	mG_low	PTF1A-iCre+/ROSA-mTmG+		85	Chromium Single Cell Multiome ATAC + Gene Expression	Novaseq 6000	11131	30286	153403	7434	6327
E63_mG_low	540_GFP_low	PTF1A-iCre+/ROSA-mTmG+	3	63	Chromium Single Cell Multiome ATAC + Gene Expression	Novaseq 6000	9057	30286	157208	6711	5939
E63_mG_high	541_GFP_high	PTF1A-iCre+/ROSA-mTmG+		63	Chromium Single Cell Multiome ATAC + Gene Expression	Novaseq 6000	4917	30286	136247	3652	3275
hESC - ATAC
Sample name	Tissue	Treatment	Treatment factor	Sampling day	Treament duration	Condition_sum	Replicate	ControlID	bamControl	PeakCaller
WT_Pan_0-24h_D12_3dpi_7.26	hESC derived EP	-	dox (0 ng/mL)	Differentiation day 12	24 hours	0-24h_D12	1	WT_Pan_0-24h_D12_3dpi_7.26	NA	macs
WT_Pan_0-24h_D12_3dpi_7.29	hESC derived EP	-	dox (0 ng/mL)	Differentiation day 12	24 hours	0-24h_D12	2	WT_Pan_0-24h_D12_3dpi_7.29	NA	macs
WT_Pan_0-24h_D12_3dpi_7.30	hESC derived EP	-	dox (0 ng/mL)	Differentiation day 12	24 hours	0-24h_D12	3	WT_Pan_0-24h_D12_3dpi_7.30	NA	macs
WT_Pan_0-24hpi_D9_7.26	hESC derived EP	-	dox (0 ng/mL)	Differentiation day 9	24 hours	0-24hpi_D9	1	WT_Pan_0-24hpi_D9_7.26	NA	macs
WT_Pan_0-24hpi_D9_7.30	hESC derived EP	-	dox (0 ng/mL)	Differentiation day 9	24 hours	0-24hpi_D9	3	WT_Pan_0-24hpi_D9_7.30	NA	macs
WT_Pan_100-24h_D12_3dpi_7.26	hESC derived EP	+	dox (100 ng/mL)	Differentiation day 12	24 hours	100-24h_D12	1	WT_Pan_100-24h_D12_3dpi_7.26	NA	macs
WT_Pan_100-24h_D12_3dpi_7.29	hESC derived EP	+	dox (100 ng/mL)	Differentiation day 12	24 hours	100-24h_D12	2	WT_Pan_100-24h_D12_3dpi_7.29	NA	macs
WT_Pan_100-24h_D12_3dpi_7.30	hESC derived EP	+	dox (100 ng/mL)	Differentiation day 12	24 hours	100-24h_D12	3	WT_Pan_100-24h_D12_3dpi_7.30	NA	macs
WT_Pan_100-24hpi_D9_7.26	hESC derived EP	+	dox (100 ng/mL)	Differentiation day 9	24 hours	100-24hpi_D9	1	WT_Pan_100-24hpi_D9_7.26	NA	macs
WT_Pan_100-24hpi_D9_7.30	hESC derived EP	+	dox (100 ng/mL)	Differentiation day 9	24 hours	100-24hpi_D9	3	WT_Pan_100-24hpi_D9_7.30	NA	macs
WT_Pan_100-8h_D12_3dpi_7.26	hESC derived EP	+	dox (100 ng/mL)	Differentiation day 12	8 hours	100-8h_D12	1	WT_Pan_100-8h_D12_3dpi_7.26	NA	macs
WT_Pan_100-8h_D12_3dpi_7.29	hESC derived EP	+	dox (100 ng/mL)	Differentiation day 12	8 hours	100-8h_D12	2	WT_Pan_100-8h_D12_3dpi_7.29	NA	macs
WT_Pan_100-8h_D12_3dpi_7.30	hESC derived EP	+	dox (100 ng/mL)	Differentiation day 12	8 hours	100-8h_D12	3	WT_Pan_100-8h_D12_3dpi_7.30	NA	macs
WT_Pan_100-8hpi_D9_7.26	hESC derived EP	+	dox (100 ng/mL)	Differentiation day 9	8 hours	100-8hpi_D9	1	WT_Pan_100-8hpi_D9_7.26	NA	macs
WT_Pan_100-8hpi_D9_7.30	hESC derived EP	+	dox (100 ng/mL)	Differentiation day 9	8 hours	100-8hpi_D9	3	WT_Pan_100-8hpi_D9_7.30	NA	macs
hESC - ChIP
Sample name	Tissue	Treatment	Treatment factor	Sampling day	Treament duration	Condition_sum	Replicate
ID_09172018	hESC derived EP	+	dox (100 ng/mL)	Differentiation day 9	8 hours	100-8hpi_D9	1
ID_05042019	hESC derived EP	+	dox (100 ng/mL)	Differentiation day 9	8 hours	100-8hpi_D9	2
ID_07142019	hESC derived EP	+	dox (100 ng/mL)	Differentiation day 9	8 hours	100-8hpi_D9	3
hESC - RNA
Sample name	Tissue	Treatment	Treatment factor	Sampling day	Treament duration	Condition_sum	Replicate
WT_Pan_0_D9-1	hESC derived EP	-	dox (0 ng/mL)	Differentiation day 9	8 hours	0-8h_D9	1
WT_Pan_0_D9-2	hESC derived EP	-	dox (0 ng/mL)	Differentiation day 9	8 hours	0-8h_D9	2
WT_Pan_0_D9-3	hESC derived EP	-	dox (0 ng/mL)	Differentiation day 9	8 hours	0-8h_D9	3
WT_Pan_0_D10-1	hESC derived EP	-	dox (0 ng/mL)	Differentiation day 10	8 hours	0-8h_D10	1
WT_Pan_0_D10-2	hESC derived EP	-	dox (0 ng/mL)	Differentiation day 10	8 hours	0-8h_D10	2
WT_Pan_0_D10-3	hESC derived EP	-	dox (0 ng/mL)	Differentiation day 10	8 hours	0-8h_D10	3
WT_Pan_0_D11-1	hESC derived EP	-	dox (0 ng/mL)	Differentiation day 11	8 hours	0-8h_D11	1
WT_Pan_0_D11-2	hESC derived EP	-	dox (0 ng/mL)	Differentiation day 11	8 hours	0-8h_D11	2
WT_Pan_0_D11-3	hESC derived EP	-	dox (0 ng/mL)	Differentiation day 11	8 hours	0-8h_D11	3
WT_Pan_0_D12-1	hESC derived EP	-	dox (0 ng/mL)	Differentiation day 12	8 hours	0-8h_D12	1
WT_Pan_0_D12-2	hESC derived EP	-	dox (0 ng/mL)	Differentiation day 12	8 hours	0-8h_D12	2
WT_Pan_0_D12-3	hESC derived EP	-	dox (0 ng/mL)	Differentiation day 12	8 hours	0-8h_D12	3
WT_Pan_100_8h_D9-1	hESC derived EP	+	dox (100 ng/mL)	Differentiation day 9	8 hours	100-8hpi_D9	1
WT_Pan_100_8h_D9-2	hESC derived EP	+	dox (100 ng/mL)	Differentiation day 9	8 hours	100-8hpi_D9	2
WT_Pan_100_8h_D9-3	hESC derived EP	+	dox (100 ng/mL)	Differentiation day 9	8 hours	100-8hpi_D9	3
WT_Pan_100_8h_D10-1	hESC derived EP	+	dox (100 ng/mL)	Differentiation day 10	8 hours	100-8h_D10	1
WT_Pan_100_8h_D10-2	hESC derived EP	+	dox (100 ng/mL)	Differentiation day 10	8 hours	100-8h_D10	2
WT_Pan_100_8h_D10-3	hESC derived EP	+	dox (100 ng/mL)	Differentiation day 10	8 hours	100-8h_D10	3
WT_Pan_100_8h_D11-1	hESC derived EP	+	dox (100 ng/mL)	Differentiation day 11	8 hours	100-8h_D11	1
WT_Pan_100_8h_D11-2	hESC derived EP	+	dox (100 ng/mL)	Differentiation day 11	8 hours	100-8h_D11	2
WT_Pan_100_8h_D11-3	hESC derived EP	+	dox (100 ng/mL)	Differentiation day 11	8 hours	100-8h_D11	3
WT_Pan_100_8h_D12-1	hESC derived EP	+	dox (100 ng/mL)	Differentiation day 12	8 hours	100-8h_D12	1
WT_Pan_100_8h_D12-2	hESC derived EP	+	dox (100 ng/mL)	Differentiation day 12	8 hours	100-8h_D12	2
WT_Pan_100_8h_D12-3	hESC derived EP	+	dox (100 ng/mL)	Differentiation day 12	8 hours	100-8h_D12	3
